# Supplementary material for: Identification of RBPMS as a mammalian smooth muscle master splicing regulator via proximity of its gene with super-enhancers
Source: eLife. 2019 Jul 8;8:e46327. doi: 10.7554/eLife.46327 (PMC6613909; doi:10.7554/eLife.46327)
Supplement: Supplementary file 1. [file elife-46327-supp1.xlsx]

## Sheet: Summary
RBP list (Gerstbergr et al RBPs)	1542 RBPs from Table S3 of Gerstberger et al 2014
Superenhancer (SE) associated genes Gene name and SE columns	Aorta SE genes
	Bladder SE genes
	Stomach Smooth Muscle SE genes
	Skeletal Muscle SE genes
RBPs associated with Superenhancers (SE)	Aorta RBPs
	Bladder RBPs
	Stomach Smooth Muscle RBPs
	Skeletal Muscle RBPs

## Sheet: Gerstbergr et al RBPs
RPS11		1542 RBPs from Table S3 of Gerstberger et al 2014
ERAL1
DDX27
DEK
PSMA6
TRIM56
TRIM71
UPF2
FARS2
FDXACB1
ALKBH8
ZNF579
POLR2B
WDR12
RPF1
MRPS34
UBTF
CDC5L
DAZAP1
MSI1
MSI2
TARDBP
TRIT1
MRPL36
KPNB1
ZNFX1
SNRNP27
RBMS2
RBMS1
RBMS3
LARS2
KIAA0020
RBFOX1
RBFOX2
RBFOX3
CWF19L1
CWF19L2
ZC3H15
LONP1
DBR1
RRP15
L1TD1
NMD3
SRSF10
SRSF12
SRSF2
SRSF8
RSL1D1
DAP3
NARS2
RBM25
POLR2E
TOE1
TSFM
TPR
STAU1
STAU2
TRMT1L
METTL3
REXO2
MRPL52
WDR3
CNOT11
YTHDC1
METTL2A
METTL2B
ZNF326
AKAP8
AKAP8L
RPS14
ELAVL1
ELAVL2
ELAVL3
ELAVL4
PNN
DDX41
TNPO2
TNPO1
PUSL1
RBM43
ZGPAT
SCAF11
USP39
RPL38
NARS
RPS16
CLASRP
RPS9
TOP3B
NCBP2L
NCBP2
SMG9
FTSJ2
DDX56
RBM28
UTP11L
MRPS18B
RPL14
RPL37
GEMIN5
MKRN1
MKRN2
MKRN3
NOA1
PINX1
HRSP12
TDRD9
DHX30
DHX29
DHX57
YTHDC2
DHX36
DHX9
EIF3G
NOL10
UTP15
GATC
TCOF1
NONO
PSPC1
SFPQ
NUDT21
MRPL19
URM1
MRPL53
RBM48
REPIN1
ZC3H12B
ZC3H12C
ZC3H12D
ZC3H12A
TRMT5
TRMT61A
PABPN1L
PABPN1
LSG1
GNL1
EEF1G
RBM33
RPP25
RPP25L
RPP38
GARS
DRG2
TRMU
GNL2
CPSF2
CD3EAP
HDLBP
RDM1
BYSL
GEMIN8
XPO5
ZNF622
DZIP1
DZIP1L
GSPT1
HBS1L
GSPT2
EIF2D
METTL1
RNASEH1
ZNHIT6
DARS2
SNRPD2
DICER1
DYNLL1
ZNF638
SAMD4B
SAMD4A
RTF1
CNOT4
TARBP2
PRKRA
GLE1
EXOSC2
SSU72
GTPBP10
RPL10A
HENMT1
THOC2
ENDOG
EXOG
ASH1L
TRMT10C
TRMT10A
TRMT10B
MRPL33
SSB
LARP7
MRPL24
RNASEK
PELO
QARS
IPO4
CAPRIN1
CAPRIN2
PNLDC1
PARN
TIAL1
TIA1
CDC40
ZNF598
RCL1
RTCA
MRPL38
ADAT2
BOP1
U2SURP
DUS3L
CSTF3
SRSF11
SREK1
POLR1E
EXOSC7
EXOSC8
EXOSC9
MRPL12
RPS28
TEFM
RPL12
ZC3H3
EIF6
NELFE
EIF2B3
APOBEC2
APOBEC3H
APOBEC3F
APOBEC3G
APOBEC1
ZC3H7A
ZC3H7B
NOP9
PQBP1
PATL2
PATL1
EDC3
WBP4
GLTSCR2
RPS18
ASCC1
EIF5A
EIF5A2
EIF5AL1
MRPL47
BOLL
DAZL
DAZ1
DAZ2
DAZ3
DAZ4
INTS1
RPLP1
MRPS11
WDR43
TRMT112
PPP1R8
FBXO17
MTHFSD
SON
SPATS2L
SPATS2
MAEL
RRP1B
RRP1
ZC3HAV1
PARP12
TIPARP
MRPS17
U2AF2
UHMK1
NUP153
CSDE1
POLR2L
NKRF
MRPL48
XRCC6
SUPT5H
TSR3
XRN2
RSRC1
TDRD5
POLR2J
POLR2J2
POLR2J3
SAFB2
SAFB
SLTM
BRIX1
POLR2I
PWP2
ELAC2
ZCCHC14
ZCCHC2
LARS
MRPL28
CNOT1
DDX18
TSEN15
USP10
SMNDC1
THUMPD2
THUMPD3
SND1
LSM4
EIF3M
MRPL34
SRP72
SUGP1
SUGP2
RPS3
RPS27A
CCAR2
CCAR1
DDX49
MRPL4
SFSWAP
MRPS12
EIF1
EIF1B
CLP1
ZMAT5
SF3B3
PLD6
QTRTD1
QTRT1
PIH1D1
SWT1
EXOSC4
EXOSC6
PTRH1
INTS8
EXOSC10
CASC3
GTF3A
MRPL54
GTPBP3
UBA1
LSM12
HINT3
CCDC59
POLDIP3
RPL32
AZGP1
EMG1
C17orf85
N4BP1
NYNRIN
KHNYN
NOP2
NSUN4
NSUN3
NSUN6
PAN2
ZCCHC9
RRP9
TNRC6A
TNRC6B
TNRC6C
RP9
MRPL15
NGDN
LSM10
PUS1
MAK16
RPS13
SNRNP200
PRDX1
TSN
NUFIP2
RBM19
TDRKH
NOP58
RBM6
RBM10
RBM5
RBM44
OASL
OAS1
OAS2
OAS3
SF3A3
NOC3L
MYEF2
HNRNPM
C11orf68
MRPL10
RNASE10
CALR
CANX
CALR3
RPP14
RPS8
PDCD7
RPS19BP1
TRMT6
RPL4
PRPF3
RARS
RARS2
APOBEC4
ZCCHC24
RPS21
DDX24
RTCB
MBNL2
MBNL3
MBNL1
ALYREF
LSMD1
PUS7
PUS7L
MRPS24
RBBP6
RPL19
NOL3
RPS27
RPS27L
PTRF
MRPS18A
SLBP
EARS2
SMAD1
SMAD2
SMAD5
SMAD9
SMAD3
SMAD4
SMAD7
SMAD6
PRPF39
SRP68
ADARB2
ADAD1
ADAD2
ADAT1
ADARB1
ADAR
CLK3
CLK4
PRPF4B
CLK1
CLK2
LSM3
FAM46A
CRYZ
KIN
RPS2
DUS4L
EIF4A1
EIF4A2
EIF4A3
IGF2BP1
IGF2BP2
IGF2BP3
UBAP2
UBAP2L
SNRPE
EIF2B5
CRNKL1
POLRMT
METTL10
MRPL41
MRPS7
NSUN5
NSUN7
MTG1
MRPS28
TDRD10
RPUSD1
NHP2
XAB2
FAU
RRP36
GRWD1
ENDOV
VARSL
MRRF
MTFMT
C12orf65
MRTO4
RBM26
RBM27
DIS3
DIS3L
DIS3L2
C1QBP
SUB1
MRPS33
PRPF6
SMG8
PSTK
GAPDH
TNPO3
IPO13
MOV10
MOV10L1
PARP1
MRPS35
GPKOW
SETD1A
SETD1B
SF3A2
AFF1
AFF3
AFF4
AFF2
PARK7
TRNAU1AP
SRBD1
EIF3D
NOP10
WARS
MATR3
SNRPD1
SNRPC
FXR1
FXR2
FMR1
MEPCE
KAT8
CIRBP
RBM3
CNOT7
CNOT8
A1CF
RBM46
RBM47
DND1
HNRNPR
SYNCRIP
ABCE1
GPATCH4
PAIP1
RBM20
GNL3
GNL3L
FAM120A
FAM120B
FAM120C
KHDC1
KHDC1L
RPL10L
RPL10
EIF2S1
MRPL20
EPRS
DHX58
DDX58
IFIH1
CDK5RAP1
HABP4
SERBP1
METTL5
ZCCHC7
WDR36
CCDC86
C2orf15
MRPL30
RPS26
TEX13A
BARD1
XPO4
RUVBL1
IMP4
DDX52
THOC1
TRPT1
NHP2L1
EIF2B2
RNF113B
RNF113A
INTS10
LENG9
RPS29
NOP16
U2AF1
U2AF1L4
RANBP6
IPO5
THOC7
DNMT3B
GFM1
RNASE9
PLRG1
REXO1
ZC3HAV1L
LSM14A
LSM14B
LUZP4
TDRD6
TDRD15
MRPS22
EEF1B2
EEF1D
SIDT1
SIDT2
TRMT44
GPATCH8
WDR4
SLIRP
ATXN1
ATXN1L
YTHDF1
YTHDF2
YTHDF3
LRPPRC
TFIP11
ILF2
STRBP
ILF3
TCERG1
NXF5
NXF2B
NXF2
NXF1
NXF3
ZRSR1
ZRSR2
MRPL35
RRS1
PRKDC
NOC2L
MTIF3
NOL11
EXOSC3
PNPT1
TSNAX
RIOK1
RIOK3
PIWIL1
PIWIL2
PIWIL3
PIWIL4
PEG10
ZCCHC5
POP7
FASTKD3
TBRG4
FASTK
TRMT13
IREB2
ACO1
ZCCHC3
SNUPN
PTRHD1
HARS
HARS2
HNRNPK
PCBP1
PCBP2
PCBP3
PCBP4
AQR
ICT1
UNK
UNKL
CEBPZ
MRPS9
THG1L
ZCCHC13
CNBP
SRRT
CD2BP2
SNRPG
APTX
RPL17
BMS1
SARS
SARS2
PAIP2
PAIP2B
GEMIN4
PNRC2
FASTKD2
GEMIN6
DDX20
DDX39A
DDX39B
DHX37
ZNF346
MRPL50
RNASE1
RNASE2
RNASE3
RNASE4
RNASE6
RNASE7
RNASE8
ANG
DYNC1H1
FTSJ3
SF3B2
CTU2
XPOT
RBMXL1
RBMXL2
RBMXL3
RBMY1A1
RBMY1B
RBMY1D
RBMY1E
RBMY1F
RBMY1J
RBMX
PPP1R10
PRR3
DKC1
MRPL17
TRA2A
TRA2B
RPL26L1
RPL26
AUH
EIF3C
EIF3CL
SCAF8
SCAF4
EEF2K
RPL6
MRPL11
G3BP1
G3BP2
MRPS26
SF3B5
DHX34
UTP23
SNRNP48
PRPF38B
HEXIM1
HEXIM2
SRRM2
SRRM3
PIH1D3
DHX40
DHX38
TRMT61B
CSDC2
CARHSP1
POP4
LARP6
RNPC3
RPL30
RUVBL2
DRG1
TRIM25
RQCD1
MRPS18C
MRPL45
RPLP2
SRP19
RPS24
AKAP17A
NXT2
NXT1
MRPL9
RPL27
RPL24
CNOT10
ABT1
DDX25
DDX19A
DDX19B
MRPS30
SMG1
EXOSC5
AIMP2
BZW2
BZW1
PARS2
INTS12
EIF3H
SKIV2L
RC3H2
RC3H1
ZFP36
ZFP36L1
ZFP36L2
ANKHD1
ANKRD17
HELZ2
UPF1
DROSHA
MRPL37
PUS10
NUDT16
NUDT16L1
TRMT11
PET112
NUFIP1
PURA
PURB
PURG
ZRANB2
THOC5
TSEN54
SRP9
PIN4
ZC3H14
CNOT2
TARBP1
AGO1
AGO2
AGO3
AGO4
LARP4B
LARP4
SNW1
EZH2
EIF3B
RPP30
ZMAT3
PTGES3
KARS
RAN
SNRPA
SNRPB2
HEATR1
PTGES3L-AARSD1
AARSD1
CPSF3
CPSF3L
CWC25
RPS5
POLR2D
C9orf114
MRPL44
ETF1
GAR1
MVP
RPF2
ZC3H18
INTS5
INTS3
LSM6
SNRPF
TUT1
MTPAP
EIF2AK1
EIF2AK2
EIF2AK3
EIF2AK4
MRPL22
PES1
LSM7
PAPD4
ZCCHC11
ZCCHC6
KHDRBS1
KHDRBS2
KHDRBS3
QKI
SF1
LRRC47
ISY1
SRRM1
IPO9
MTRF1
MTRF1L
WIBG
PPAN
FUBP3
FUBP1
KHSRP
CHTOP
PTCD2
POLR2A
MRPL43
DDX55
RPS15
CPSF4
CPSF4L
CSTF2
CSTF2T
RAVER2
RAVER1
EIF1AX
EIF1AY
DALRD3
NSUN2
URB2
PHAX
PPARGC1A
PPARGC1B
PPRC1
PHF5A
MCTS1
RRP7A
DGCR8
ZC3H13
UPF3A
UPF3B
RBM24
RBM38
THOC3
IGHMBP2
PAPD5
PAPD7
GFM2
PHRF1
VARS
VARS2
MRPL1
INTS7
ATXN2L
ATXN2
PPIL4
PPIL3
PPWD1
CWC27
PPIH
NUTF2
MRPL18
LSM11
AARS2
AARS
MIF4GD
CTIF
C9orf129
LUC7L2
LUC7L3
LUC7L
DUS2
RNF17
TDRD1
MRPS10
FAM103A1
ENOX1
ENOX2
RBPMS
RBPMS2
NIP7
RPL3
RPL3L
RNASE11
RNASE12
RPLP0
RBM34
CMTR2
ENDOU
PUM1
PUM2
TYW5
TYW3
TRMT1
RAE1
SLU7
EIF2B4
EIF5B
GPATCH1
RPL36
EEF1A1
EEF1A2
RRP8
UBA52
R3HDM1
R3HDM2
PA2G4
AAR2
ERI1
ERI2
ERI3
NIFK
METTL14
MRPL32
CPSF6
CPSF7
RPL7A
WDR46
SRP14
TFAM
CMSS1
XPO6
EXOSC1
ZNF106
UTP14A
UTP14C
TRUB1
TRUB2
PRIM1
PTCD3
HNRNPA0
HNRNPA1
HNRNPA1L2
HNRNPA2B1
HNRNPA3
HNRNPAB
HNRNPD
HNRNPDL
RANBP2
RPL7
RPL7L1
RNASE13
RPS6
MRPL3
DDX28
DDX47
RNASEH2C
TFB2M
TEP1
NOC4L
CPSF1
DDX1
DDX3X
DDX3Y
DDX4
NOP56
RPS20
MPHOSPH10
MRM1
DXO
DENR
RPL21
RPS10
NAT10
UTP18
NOL12
DDX31
ABCF1
DNMT1
SNRPA1
API5
SHQ1
AKAP1
FTO
PUF60
SAMHD1
RBM45
FAM98B
FAM98A
FAM98C
PCF11
EIF5
ZC3HC1
HNRNPC
HNRNPCL1
RALY
RALYL
SEPSECS
NPM1
NPM3
NPM2
NUPL2
MRPS14
SF3A1
EIF3A
FASTKD5
TDRD3
SNRPB
SNRPN
YRDC
POLR2K
ERN2
ERN1
RPL5
RPS17
RPS17L
DARS
IPO7
IPO8
SMN1
SMN2
GTPBP4
MRPL13
MRPL46
LSM5
EIF4G3
EIF4G1
EIF4G2
GTF2F1
RPS15A
PIH1D2
TTF2
PUS3
RBM7
RBM11
TSEN2
RBM42
UTP3
HNRNPL
HNRNPLL
PTBP1
PTBP2
PTBP3
SYMPK
POLR2F
TSR2
KIAA0391
POLR2G
WDR5
SNRNP40
WDR83
ZFC3H1
RPL15
SNRNP35
SNRNP70
MRPL39
TLR7
TLR8
TLR3
NAA38
PRPF31
MRPL55
TRMT2A
TRMT2B
RPS3A
BRCA1
RIOK2
DHX16
DHX33
DHX35
DHX32
DQX1
DHX15
DHX8
MRPS5
SAP18
TUFM
EEFSEC
TDRD12
SKIV2L2
TRDMT1
ZNF473
FCF1
URB1
CARS
CARS2
CELF1
CELF2
CELF3
CELF4
CELF5
CELF6
XPO1
DDX17
DDX46
DDX5
DDX42
DDX43
DDX53
FIP1L1
MRPL14
TXNL4A
TXNL4B
RBM39
RBM23
CPEB1
CPEB2
CPEB3
CPEB4
INTS9
CACTIN
MPHOSPH6
RPL34
OBFC1
RPS12
PRPF8
SECISBP2L
SECISBP2
RPUSD3
RPUSD4
DDX6
RPL28
ELAC1
NOM1
TROVE2
EEF1E1
TARSL2
TARS
TARS2
IARS
RPL18A
ESF1
EEF2
EFTUD2
DDX60
DDX60L
MRPL2
SLC4A1AP
MAZ
EIF2S3L
EIF2S3
AIMP1
APEX1
EIF3J
PABPC3
PABPC1L
PABPC1L2A
PABPC1L2B
PABPC4L
PABPC5
PABPC4
PABPC1
MEX3A
MEX3B
MEX3C
MEX3D
GEMIN7
MRPS23
PSIP1
SRP54
FARSB
SPEN
RBM15B
RBM15
DNAAF2
SF3B1
RNASEH2B
FARSA
NOB1
EIF2A
RNASEL
TRNT1
EIF4ENIF1
MECP2
RBM22
CMTR1
RPL39
RPL39L
RPSA
PARP4
CSTF1
NCBP1
SNRNP25
DNAJC21
CWC22
NFX1
MRPS31
SMG5
SART1
GEMIN2
NR0B1
DCP2
TAF15
EWSR1
FUS
EDC4
FBLL1
FBL
MRPS27
ALKBH1
ZCCHC17
MRPL49
RPL18
RPS4X
RPS4Y1
RPS4Y2
NOP14
KRR1
NCL
PRPF18
C1D
ADAT3
UTP20
SNIP1
GUF1
GCFC2
UTP6
SRSF1
SRSF3
SRSF4
SRSF5
SRSF6
SRSF7
SRSF9
USB1
NOL6
PPIE
RRBP1
SUZ12
TERT
MSL3
BICC1
MRPS16
RBMX2
MRPL40
ISG20
ISG20L2
AEN
REXO4
TGS1
ZC3H4
ZC3H6
ZC3H8
RPL27A
RPS19
SYF2
TFB1M
DIMT1
TSEN34
DCAF13
RPL9
ARHGEF28
AC004381.6
EIF4H
EIF4B
DDX54
MRPS36
PRPF40A
PRPF40B
EIF3L
NOL8
MTO1
PSMA1
HTATSF1
FTSJ1
LAS1L
POP1
DZIP3
DGCR14
CDK9
PAN3
RPL29
DCPS
MRP63
MRPL27
POLR2H
ZNF239
XRN1
ZFR
ZFR2
AGFG1
NSA2
DDX10
TBL3
INTS2
YBX1
YBX2
YBX3
SURF6
THOC6
EIF3I
STRAP
RPL13
RRP12
MRPS2
ZCCHC8
EFTUD1
RPL35
NSRP1
RPUSD2
BCDIN3D
THUMPD1
TRIM21
RANBP17
XPO7
TRMT12
ACIN1
ZNF385A
RPL23
EED
DNTTIP2
SBDS
DDX51
RBM18
IPO11
RPL22
RPL22L1
LCMT2
ZC3H11A
FYTTD1
RNPS1
RPS23
RNASEH2A
FRG1B
FRG1
NOL7
PRPF38A
RBM41
RBM12
RBM12B
ESRP1
ESRP2
HNRNPF
HNRNPH1
HNRNPH2
HNRNPH3
GRSF1
RNH1
NOL9
SRFBP1
ARL6IP4
RPP40
ALKBH5
SMG7
PDE12
CCRN4L
ANGEL1
ANGEL2
CNOT6
CNOT6L
PDCD11
RPL35A
MRPL21
SMG6
PRPF19
PRPF4
INTS4
SRPK2
SUPV3L1
RBM17
NAF1
YARS
LRRFIP1
LRRFIP2
EIF4E2
EIF4E1B
EIF4E3
EIF4E
BUD13
CTU1
GTPBP1
GTPBP2
MTERFD2
SRPR
DDX50
DDX21
ZCRB1
RPL13A
SRA1
PAPOLB
PAPOLG
PAPOLA
RPL41
ZNF768
SCAF1
MRPS15
RNASET2
EIF2B1
RPL36A
RPL36AL
DDX26B
INTS6
RPS7
RRNAD1
MRPS21
SETD7
RBM8A
MAGOH
MAGOHB
RPL37A
NOLC1
IARS2
LSM1
SUPT4H1
EXO1
DCP1B
DCP1A
DNAJC17
RNGTT
DUSP11
CHERP
WDR61
NANOS1
NANOS2
NANOS3
EBNA1BP2
HELZ
RNMTL1
PDCD4
PTRH2
SART3
ZC3H10
LSM2
MRPS25
RPP21
ZMAT2
IFIT1
IFIT2
IFIT5
IFIT1B
IFIT3
NOVA1
NOVA2
SNRPD3
YARS2
PTCD1
TSR1
MRPS6
TAF9
RPL11
DDX23
DDX59
CCNT2
CCNT1
RPL8
SARNP
IMP3
SRRM4
CNP
LIN28A
LIN28B
EIF3K
SF3B14
EIF2S2
RNMT
MRPL42
THRAP3
BCLAF1
CXorf23
PNO1
RBM4
RBM4B
RBM14
R3HCC1
R3HCC1L
KIAA0430
POP5
MRPL51
MARS
TYW1
MRPL16
DUS1L
QRSL1
WARS2
WRAP53
RSL24D1
SF3B4
TDRD7
LARP1
LARP1B
RPL23A
BAZ2A
BAZ2B
EIF3E
CWC15
TOP1
RPL31
SUPT6H
TST
HNRNPU
HNRNPUL1
HNRNPUL2
RPS25
MRPL23
EIF1AD
SETX
MARS2
CNOT3
MTIF2
JAKMIP1
FASTKD1

## Sheet: AORTA SE Genes
# GREAT version 3.0.0	Species assembly: hg19	Association rule: Basal+extension: 5000 bp upstream, 1000 bp downstream, 1000000 bp max extension, curated regulatory domains included
Gene	SE
A1CF	20_MACS_peak_5319_lociStitched (-134331)
A4GALT	9_MACS_peak_26894_lociStitched (+7398)
ABCC1	13_MACS_peak_15747_lociStitched (+22421)
ABCC6	13_MACS_peak_15747_lociStitched (+251466)
ABHD2	23_MACS_peak_14986_lociStitched (+27505)
ABL1	13_MACS_peak_42822_lociStitched (+134955)
ABR	9_MACS_peak_16807_lociStitched (+68827), 7_MACS_peak_16800_lociStitched (+155198)
ABTB1	5_MACS_peak_29299_lociStitched (+28202)
ACCSL	4_MACS_peak_7711_lociStitched (-113432), 10_MACS_peak_7721_lociStitched (-35676)
ACSM1	1_MACS_peak_15809_lociStitched (+78619)
ACSM2B	1_MACS_peak_15809_lociStitched (-36270)
ACSS1	4_MACS_peak_24891_lociStitched (+9806)
ACTB	2_MACS_peak_37287_lociStitched (+883)
ACTG1	7_MACS_peak_18603_lociStitched (+100453)
ACTL8	32_MACS_peak_561_lociStitched (-155828)
ACTN1	21_MACS_peak_13088_lociStitched (-86016), 28_MACS_peak_13065_lociStitched (+47936), 4_MACS_peak_13045_lociStitched (+180088)
ACTN4	17_MACS_peak_20403_lociStitched (+43926)
ACTRT3	7_MACS_peak_29849_lociStitched (+109935)
ADA	8_MACS_peak_25238_lociStitched (+56872)
ADAM30	11_MACS_peak_2449_lociStitched (-154227)
ADAMTS9	8_MACS_peak_28364_lociStitched (+10201)
ADAMTSL4	13_MACS_peak_2618_lociStitched (+5416)
ADCY5	27_MACS_peak_29041_lociStitched (+62971)
ADHFE1	10_MACS_peak_39960_lociStitched (+89848)
ADI1	6_MACS_peak_20980_lociStitched (+42109)
ADIRF	MACS_peak_5939 (+1408)
ADPRHL1	5_MACS_peak_12331_lociStitched (+46291)
ADRA1A	4_MACS_peak_39467_lociStitched (+260256)
ADRA1B	12_MACS_peak_34383_lociStitched (-145931)
ADRM1	5_MACS_peak_25595_lociStitched (+62009)
ADSSL1	4_MACS_peak_13690_lociStitched (+6468)
AEBP1	5_MACS_peak_37744_lociStitched (-11815)
AGBL3	96_MACS_peak_38833_lociStitched (-159637)
AHDC1	12_MACS_peak_874_lociStitched (+41695)
AHNAK	7_MACS_peak_7936_lociStitched (-9410)
AKAP1	8_MACS_peak_18120_lociStitched (+15283)
AKAP10	9_MACS_peak_17342_lociStitched (-102075)
AKAP8	17_MACS_peak_20009_lociStitched (+91563)
AKNA	9_MACS_peak_42329_lociStitched (+12280)
ALDH1B1	5_MACS_peak_41470_lociStitched (-5674)
ALDH4A1	2_MACS_peak_579_lociStitched (-48918), 7_MACS_peak_572_lociStitched (-17481)
ALG8	9_MACS_peak_8385_lociStitched (-36371)
ALKBH3	4_MACS_peak_7711_lociStitched (+53710), 10_MACS_peak_7721_lociStitched (+131466)
ALOX5AP	7_MACS_peak_11534_lociStitched (+136817)
ALPK3	8_MACS_peak_14860_lociStitched (+14364)
AMOTL2	14_MACS_peak_29431_lociStitched (+32708)
ANAPC1	5_MACS_peak_22919_lociStitched (+395003)
ANKS1A	16_MACS_peak_35484_lociStitched (+149893)
ANO1	13_MACS_peak_8234_lociStitched (-79481), 13_MACS_peak_8239_lociStitched (+26324)
ANO2	8_MACS_peak_9363_lociStitched (+498184)
ANP32E	4_MACS_peak_2592_lociStitched (+78883)
ANTXR1	64_MACS_peak_22345_lociStitched (+111305)
ANXA11	7_MACS_peak_5887_lociStitched (+4373), 7_MACS_peak_5883_lociStitched (+45748)
ANXA2	13_MACS_peak_14246_lociStitched (+11448)
APMAP	4_MACS_peak_24891_lociStitched (-55397)
APOL1	29_MACS_peak_26682_lociStitched (+79736)
APPL2	28_MACS_peak_10866_lociStitched (-875041)
AQP1	6_MACS_peak_37571_lociStitched (-6753)
ARF6	8_MACS_peak_12625_lociStitched (+96486)
ARFGAP3	11_MACS_peak_26925_lociStitched (-128551), 14_MACS_peak_26908_lociStitched (-68817)
ARHGAP10	21_MACS_peak_31891_lociStitched (+104789)
ARHGAP23	7_MACS_peak_17609_lociStitched (+15354)
ARHGEF10L	32_MACS_peak_561_lociStitched (+59650)
ARHGEF16	MACS_peak_73 (-381981), MACS_peak_79 (-333272), 14_MACS_peak_85_lociStitched (-257549), 16_MACS_peak_106_lociStitched (-100487), 4_MACS_peak_115_lociStitched (+84041)
ARHGEF17	9_MACS_peak_8303_lociStitched (+31646)
ARHGEF2	8_MACS_peak_2781_lociStitched (+3520)
ARHGEF7	17_MACS_peak_12308_lociStitched (+86521)
ARID1A	5_MACS_peak_830_lociStitched (+81939)
ARID1B	5_MACS_peak_36933_lociStitched (+447575)
ARID5A	5_MACS_peak_22630_lociStitched (+1753)
ARID5B	32_MACS_peak_5461_lociStitched (+138684)
ARL8B	6_MACS_peak_27079_lociStitched (-135817)
ARVCF	4_MACS_peak_26254_lociStitched (+27392)
ASAP2	8_MACS_peak_21021_lociStitched (-28095), 13_MACS_peak_21035_lociStitched (+30723), 16_MACS_peak_21045_lociStitched (+107810)
ASB13	13_MACS_peak_4491_lociStitched (+46162), 5_MACS_peak_4486_lociStitched (+119782)
ASB2	8_MACS_peak_13559_lociStitched (-681)
ASIC2	6_MACS_peak_17559_lociStitched (-954275)
ASPN	15_MACS_peak_41805_lociStitched (-5770)
ATF7IP2	9_MACS_peak_15547_lociStitched (+181771)
ATG7	25_MACS_peak_27238_lociStitched (+244897)
ATOH8	12_MACS_peak_22539_lociStitched (+20831)
ATP10A	8_MACS_peak_13783_lociStitched (+18353), 9_MACS_peak_13772_lociStitched (+72670), 8_MACS_peak_13764_lociStitched (+133440), 8_MACS_peak_13758_lociStitched (+181925)
ATP2B4	8_MACS_peak_3575_lociStitched (-63713), 6_MACS_peak_3588_lociStitched (+54220)
ATP6AP1L	19_MACS_peak_33256_lociStitched (+91208)
ATP6V0A1	7_MACS_peak_17743_lociStitched (+64604)
ATP8B1	15_MACS_peak_19325_lociStitched (+9672)
ATXN10	3_MACS_peak_26966_lociStitched (-125417)
AZIN1	1_MACS_peak_40370_lociStitched (+57016), 13_MACS_peak_40360_lociStitched (+106239)
B3GNT7	10_MACS_peak_24295_lociStitched (-190986)
B4GALNT3	9_MACS_peak_9206_lociStitched (+7631)
BCAR1	4_MACS_peak_16505_lociStitched (+14923)
BCL2L1	20_MACS_peak_24938_lociStitched (+29963)
BCL2L11	5_MACS_peak_22919_lociStitched (+368758)
BCL2L14	18_MACS_peak_9531_lociStitched (-291182)
BCL9L	3_MACS_peak_8894_lociStitched (-9472)
BCR	12_MACS_peak_26323_lociStitched (+52210)
BEAN1	5_MACS_peak_16240_lociStitched (+84184)
BGN	7_MACS_peak_43946_lociStitched (-4545)
BHLHE40	6_MACS_peak_27079_lociStitched (+7287)
BID	4_MACS_peak_26210_lociStitched (-71563)
BIN3	5_MACS_peak_39375_lociStitched (+10768)
BLID	24_MACS_peak_8973_lociStitched (-72017)
BMF	7_MACS_peak_13899_lociStitched (+20761)
BMP8A	15_MACS_peak_1157_lociStitched (-317310), 15_MACS_peak_1170_lociStitched (-105058)
BMPR1A	4_MACS_peak_5909_lociStitched (-67306)
BOP1	3_MACS_peak_40907_lociStitched (+22684)
BRD1	1_MACS_peak_27006_lociStitched (+809688)
BRD4	17_MACS_peak_20009_lociStitched (-7778)
BRSK2	1_MACS_peak_6951_lociStitched (+72435)
C10orf10	8_MACS_peak_5251_lociStitched (-2308)
C10orf105	3_MACS_peak_5591_lociStitched (-49852)
C10orf35	7_MACS_peak_5557_lociStitched (+112306)
C10orf54	3_MACS_peak_5591_lociStitched (+3825)
C11orf30	5_MACS_peak_8358_lociStitched (+170450)
C11orf44	20_MACS_peak_9168_lociStitched (+213065)
C12orf44	7_MACS_peak_10166_lociStitched (-30344)
C17orf70	5_MACS_peak_18614_lociStitched (-12751)
C19orf12	4_MACS_peak_20248_lociStitched (+41184)
C19orf26	3_MACS_peak_19531_lociStitched (+25473)
C19orf77	4_MACS_peak_19631_lociStitched (+21080), 11_MACS_peak_19625_lociStitched (+95348)
C1QTNF1	6_MACS_peak_18563_lociStitched (+13167)
C1QTNF3	17_MACS_peak_32571_lociStitched (-466907)
C1QTNF7	27_MACS_peak_30577_lociStitched (+48860)
C1QTNF8	2_MACS_peak_15371_lociStitched (+2152)
C1orf191	7_MACS_peak_1485_lociStitched (+51973)
C1orf198	8_MACS_peak_4117_lociStitched (+22940)
C1orf61	12_MACS_peak_2813_lociStitched (-54435)
C1orf86	MACS_peak_45 (-19039), MACS_peak_44 (-14229)
C1orf95	7_MACS_peak_3986_lociStitched (+120046)
C2CD4B	22_MACS_peak_14274_lociStitched (-268161)
C5	20_MACS_peak_42435_lociStitched (+108275)
C7orf69	14_MACS_peak_37842_lociStitched (-224618)
C9orf3	22_MACS_peak_41892_lociStitched (+40107), 22_MACS_peak_41923_lociStitched (+168073), MACS_peak_41981 (+334674)
CABIN1	7_MACS_peak_26352_lociStitched (+146768)
CABLES1	9_MACS_peak_18976_lociStitched (+104912)
CACNA1A	6_MACS_peak_19928_lociStitched (+343377)
CACNA1C	23_MACS_peak_9243_lociStitched (+42955), 6_MACS_peak_9279_lociStitched (+231811), 9_MACS_peak_9283_lociStitched (+287866)
CACTIN	2_MACS_peak_19642_lociStitched (-43885)
CALD1	96_MACS_peak_38833_lociStitched (+47221)
CALM1	7_MACS_peak_13430_lociStitched (+3562)
CALM2	19_MACS_peak_22030_lociStitched (+165462)
CALM3	MACS_peak_20629 (+22126)
CALML3	5_MACS_peak_4486_lociStitched (+21835), 13_MACS_peak_4491_lociStitched (+95455)
CAMK2G	9_MACS_peak_5664_lociStitched (+11762)
CAPN12	17_MACS_peak_20403_lociStitched (+52878)
CAPN13	2_MACS_peak_21462_lociStitched (+115023)
CAPN2	13_MACS_peak_3891_lociStitched (+12061)
CAPN9	8_MACS_peak_4117_lociStitched (+98329)
CAPNS1	5_MACS_peak_20337_lociStitched (+1111)
CAPZB	26_MACS_peak_594_lociStitched (+64963)
CARS	4_MACS_peak_6991_lociStitched (-100489)
CASZ1	4_MACS_peak_325_lociStitched (+161390)
CAV1	5_MACS_peak_38631_lociStitched (-15732)
CAV2	5_MACS_peak_38631_lociStitched (+9663)
CBL	4_MACS_peak_8914_lociStitched (+107352)
CBR4	32_MACS_peak_32118_lociStitched (+146165)
CC2D2A	27_MACS_peak_30577_lociStitched (-81069)
CCDC19	4_MACS_peak_2857_lociStitched (-18175)
CCL2	6_MACS_peak_17559_lociStitched (-8023)
CCL22	6_MACS_peak_16196_lociStitched (-49931)
CD1D	10_MACS_peak_2840_lociStitched (-170574)
CD300A	7_MACS_peak_18407_lociStitched (-25441)
CD34	13_MACS_peak_3709_lociStitched (-315881), 11_MACS_peak_3680_lociStitched (+74190)
CD44	22_MACS_peak_7664_lociStitched (+26280)
CD46	11_MACS_peak_3680_lociStitched (+85155)
CD81	6_MACS_peak_6965_lociStitched (+11666)
CD9	21_MACS_peak_9377_lociStitched (+877)
CD93	7_MACS_peak_24869_lociStitched (-65922)
CDC42BPG	7_MACS_peak_8021_lociStitched (-22393)
CDC42EP1	4_MACS_peak_26707_lociStitched (-4061)
CDC42EP4	4_MACS_peak_18401_lociStitched (+10796)
CDS2	14_MACS_peak_24656_lociStitched (+32880)
CEBPB	6_MACS_peak_25458_lociStitched (+207394)
CEP120	34_MACS_peak_33599_lociStitched (+288366)
CHST3	10_MACS_peak_5596_lociStitched (+25729)
CHSY1	10_MACS_peak_15323_lociStitched (+64421)
CIC	4_MACS_peak_20515_lociStitched (-8926)
CITED4	8_MACS_peak_1227_lociStitched (+61637)
CLCNKA	1_MACS_peak_486_lociStitched (-4864)
CLEC18A	17_MACS_peak_16351_lociStitched (-94921), 6_MACS_peak_16367_lociStitched (-21505)
CLMP	21_MACS_peak_9033_lociStitched (+37720)
CMKLR1	12_MACS_peak_10913_lociStitched (+13044)
COA1	12_MACS_peak_37722_lociStitched (+15006)
COL13A1	7_MACS_peak_5557_lociStitched (-59368)
COL16A1	2_MACS_peak_957_lociStitched (-3257)
COL18A1	5_MACS_peak_26151_lociStitched (-147149), 8_MACS_peak_26164_lociStitched (-33738)
COL27A1	8_MACS_peak_42314_lociStitched (+15237)
COL4A2	92_MACS_peak_12229_lociStitched (+22225), 12_MACS_peak_12265_lociStitched (+211823)
COL5A1	4_MACS_peak_42903_lociStitched (+10893)
COL6A1	7_MACS_peak_26171_lociStitched (-10210), 4_MACS_peak_26178_lociStitched (+71521)
COL6A2	4_MACS_peak_26178_lociStitched (-44839)
COL8A1	18_MACS_peak_28747_lociStitched (+308552)
COPRS	10_MACS_peak_17487_lociStitched (+285435)
CORO1C	18_MACS_peak_10960_lociStitched (-84518), 17_MACS_peak_10923_lociStitched (+48950)
CORO2B	12_MACS_peak_14525_lociStitched (-85099)
CORO7-PAM16	4_MACS_peak_15487_lociStitched (+35360)
COX4I2	20_MACS_peak_24938_lociStitched (+55047)
COX7A1	5_MACS_peak_20337_lociStitched (+12183)
CPO	13_MACS_peak_23816_lociStitched (+208933)
CPSF4L	4_MACS_peak_18401_lociStitched (-39499)
CPXM2	9_MACS_peak_6801_lociStitched (+17729)
CREB3L2	45_MACS_peak_38958_lociStitched (+70165)
CRIM1	64_MACS_peak_21683_lociStitched (+93466)
CRIP1	MACS_peak_13710 (-1181)
CRTAP	20_MACS_peak_27692_lociStitched (+32956)
CRYBB3	16_MACS_peak_26393_lociStitched (-106368)
CSDC2	5_MACS_peak_26865_lociStitched (+2393)
CSNK1A1	MACS_peak_34092 (+143353)
CSNK2A3	8_MACS_peak_7217_lociStitched (-222803)
CSPG4	3_MACS_peak_14726_lociStitched (+7631), 5_MACS_peak_14724_lociStitched (+55044)
CSRNP1	2_MACS_peak_27857_lociStitched (+5433)
CSRP1	8_MACS_peak_3408_lociStitched (+12809)
CTAGE1	17_MACS_peak_18922_lociStitched (+230525)
CTBP2	15_MACS_peak_6849_lociStitched (+3613)
CTDSP1	4_MACS_peak_24065_lociStitched (+1495)
CTDSP2	19_MACS_peak_10368_lociStitched (-20899)
CTDSPL	15_MACS_peak_27782_lociStitched (-267704), 16_MACS_peak_27797_lociStitched (-183164)
CTIF	10_MACS_peak_19224_lociStitched (+276326), 9_MACS_peak_19237_lociStitched (+399712)
CTRB1	4_MACS_peak_16505_lociStitched (+32084)
CTSD	2_MACS_peak_6959_lociStitched (-61991)
CXCR5	2_MACS_peak_8893_lociStitched (-3405)
CXCR6	10_MACS_peak_28001_lociStitched (+25200)
CXXC5	3_MACS_peak_33882_lociStitched (+6315)
CYB5R3	9_MACS_peak_26894_lociStitched (-43079)
CYFIP1	13_MACS_peak_13729_lociStitched (+30194)
CYP17A1	12_MACS_peak_6439_lociStitched (+40892)
CYP26A1	20_MACS_peak_6132_lociStitched (+373250)
CYR61	6_MACS_peak_2044_lociStitched (-5732)
DAAM1	16_MACS_peak_12849_lociStitched (+61924)
DAAM2	18_MACS_peak_35624_lociStitched (+38731), 2_MACS_peak_35639_lociStitched (+91863)
DAB2IP	13_MACS_peak_42484_lociStitched (-84818), 9_MACS_peak_42498_lociStitched (+181853)
DBN1	3_MACS_peak_34592_lociStitched (-15436)
DBX1	27_MACS_peak_7512_lociStitched (+83439), 30_MACS_peak_7467_lociStitched (+269186), 38_MACS_peak_7440_lociStitched (+415629)
DCAF5	21_MACS_peak_13088_lociStitched (+87871)
DDAH1	6_MACS_peak_2044_lociStitched (-109889)
DDR1	10_MACS_peak_35356_lociStitched (-122138)
DGKI	45_MACS_peak_38958_lociStitched (-85029)
DHRS3	10_MACS_peak_408_lociStitched (+36504), 26_MACS_peak_391_lociStitched (+150058)
DHX16	2_MACS_peak_35344_lociStitched (-12078)
DHX37	6_MACS_peak_11313_lociStitched (+66240)
DHX40	16_MACS_peak_18182_lociStitched (-207114)
DIAPH1	3_MACS_peak_33914_lociStitched (+101515)
DISP2	5_MACS_peak_13910_lociStitched (-24731)
DKK3	5_MACS_peak_7238_lociStitched (-70830), 8_MACS_peak_7230_lociStitched (+12992)
DLGAP1	3_MACS_peak_18731_lociStitched (+856250)
DLGAP4	11_MACS_peak_25060_lociStitched (+214503)
DMBT1	8_MACS_peak_6786_lociStitched (-77735)
DMPK	2_MACS_peak_20596_lociStitched (+5270)
DMRT1	42_MACS_peak_40983_lociStitched (-121678)
DNAJB5	2_MACS_peak_41348_lociStitched (+4402)
DNASE1L3	19_MACS_peak_28253_lociStitched (+174024)
DOCK5	19_MACS_peak_39445_lociStitched (+186267)
DPYSL2	4_MACS_peak_39467_lociStitched (+27307)
DPYSL3	19_MACS_peak_34036_lociStitched (+81524)
DSN1	13_MACS_peak_25088_lociStitched (-67541)
DSTN	23_MACS_peak_24787_lociStitched (+9197)
DUSP1	17_MACS_peak_34484_lociStitched (+14396)
DUSP7	5_MACS_peak_28188_lociStitched (-12995)
E2F6	9_MACS_peak_21105_lociStitched (+77838)
E2F8	18_MACS_peak_7395_lociStitched (-361852)
EAPP	2_MACS_peak_12556_lociStitched (-11841)
ECE1	11_MACS_peak_658_lociStitched (-36095), 7_MACS_peak_648_lociStitched (+36184)
ECM2	8_MACS_peak_41822_lociStitched (-77554), 15_MACS_peak_41805_lociStitched (+47779)
EDEM3	16_MACS_peak_3326_lociStitched (-128403)
EEF1G	7_MACS_peak_7936_lociStitched (+17728)
EEF2K	9_MACS_peak_15852_lociStitched (+4743)
EFCAB1	11_MACS_peak_39872_lociStitched (+205957), 2_MACS_peak_39864_lociStitched (+303627)
EFCAB13	14_MACS_peak_17920_lociStitched (-34093)
EFHC1	7_MACS_peak_35784_lociStitched (+90072), 11_MACS_peak_35794_lociStitched (+136875)
EHD1	7_MACS_peak_8021_lociStitched (+11757)
EHD4	16_MACS_peak_13949_lociStitched (+29143)
EIF4E3	32_MACS_peak_28520_lociStitched (+588737)
EIF4G3	7_MACS_peak_648_lociStitched (-77455)
ELMSAN1	13_MACS_peak_13197_lociStitched (+6413)
ELN	13_MACS_peak_38056_lociStitched (-141081), 29_MACS_peak_38086_lociStitched (-5173)
EML4	5_MACS_peak_21817_lociStitched (-114227)
EMP2	9_MACS_peak_15547_lociStitched (+12872)
ENG	10_MACS_peak_42645_lociStitched (+2690)
ENGASE	6_MACS_peak_18563_lociStitched (-37607)
ENPP5	35_MACS_peak_35737_lociStitched (-300814)
ENSG00000170276	MACS_peak_8737 (+23)
ENSG00000171282	7_MACS_peak_18603_lociStitched (+5814)
ENSG00000204775	3_MACS_peak_40901_lociStitched (+7837)
ENSG00000232850	2_MACS_peak_42661_lociStitched (-32111)
ENSG00000248751	6_MACS_peak_26530_lociStitched (-8943)
ENSG00000250424	16_MACS_peak_37554_lociStitched (-69217), 3_MACS_peak_37567_lociStitched (+101), 6_MACS_peak_37571_lociStitched (+51707)
ENSG00000255168	3_MACS_peak_2499_lociStitched (-75350)
ENSG00000259753	14_MACS_peak_17920_lociStitched (+35991)
ENSG00000261130	1_MACS_peak_15680_lociStitched (-251894)
ENTPD6	5_MACS_peak_24893_lociStitched (+36402)
EPAS1	9_MACS_peak_21989_lociStitched (+9222)
EPHA1	2_MACS_peak_39050_lociStitched (+22779)
EPPK1	2_MACS_peak_40891_lociStitched (-67138)
EPS15L1	8_MACS_peak_20062_lociStitched (+143985)
ERCC1	10_MACS_peak_20577_lociStitched (-29945)
ERF	4_MACS_peak_20515_lociStitched (-20582)
ERG	20_MACS_peak_25942_lociStitched (+40584), 40_MACS_peak_25925_lociStitched (+180677)
ERGIC1	27_MACS_peak_34518_lociStitched (+59941)
ERRFI1	5_MACS_peak_200_lociStitched (-177439), 8_MACS_peak_196_lociStitched (-101243), 19_MACS_peak_172_lociStitched (-24764)
ESM1	33_MACS_peak_32757_lociStitched (+323132), 14_MACS_peak_32736_lociStitched (+452513)
ETAA1	5_MACS_peak_22245_lociStitched (-957333)
ETS1	9_MACS_peak_9116_lociStitched (+79485)
ETS2	9_MACS_peak_25975_lociStitched (+9154), 10_MACS_peak_25992_lociStitched (+109665)
ETV6	18_MACS_peak_9531_lociStitched (+129903)
EVA1B	8_MACS_peak_1104_lociStitched (-41769)
EXT1	81_MACS_peak_40539_lociStitched (+159558)
EYA2	14_MACS_peak_25314_lociStitched (+439133)
FADD	13_MACS_peak_8239_lociStitched (-98537)
FADS2	MACS_peak_7908 (+3076)
FADS3	MACS_peak_7908 (+60697)
FAM129A	16_MACS_peak_3326_lociStitched (+91232)
FAM129B	20_MACS_peak_42618_lociStitched (+31689)
FAM180A	6_MACS_peak_38942_lociStitched (-7941)
FAM198B	15_MACS_peak_32004_lociStitched (-5633)
FAM19A5	1_MACS_peak_27006_lociStitched (+523492)
FANCC	MACS_peak_41981 (+223244), 22_MACS_peak_41923_lociStitched (+389845), 22_MACS_peak_41892_lociStitched (+517811)
FAS	28_MACS_peak_5978_lociStitched (-31559)
FAT2	14_MACS_peak_34202_lociStitched (-112345)
FBLN1	3_MACS_peak_26966_lociStitched (+43491)
FBLN5	29_MACS_peak_13495_lociStitched (+35740)
FBXO31	18_MACS_peak_16698_lociStitched (+794910)
FBXO32	20_MACS_peak_40667_lociStitched (+31681)
FCHSD2	5_MACS_peak_8291_lociStitched (-7442)
FCN2	4_MACS_peak_42903_lociStitched (-228145)
FEM1B	16_MACS_peak_14518_lociStitched (+69827)
FEZ2	64_MACS_peak_21683_lociStitched (+148799)
FGF3	13_MACS_peak_8234_lociStitched (-211135)
FGFR1	6_MACS_peak_39702_lociStitched (+8541)
FHL1	27_MACS_peak_43867_lociStitched (+37772)
FHL3	4_MACS_peak_1130_lociStitched (-178)
FILIP1L	18_MACS_peak_28747_lociStitched (+167486)
FKBP4	23_MACS_peak_9243_lociStitched (-698435), 6_MACS_peak_9279_lociStitched (-509579), 9_MACS_peak_9283_lociStitched (-453524)
FKBP5	4_MACS_peak_35535_lociStitched (+2157)
FLNB	19_MACS_peak_28253_lociStitched (+32247)
FMOD	11_MACS_peak_3568_lociStitched (-112369)
FOS	8_MACS_peak_13274_lociStitched (-1816)
FOSB	10_MACS_peak_20577_lociStitched (-14484)
FOSL2	4_MACS_peak_21389_lociStitched (+9503)
FOXB1	13_MACS_peak_14246_lociStitched (+382315)
FOXC1	7_MACS_peak_34667_lociStitched (+4929), 5_MACS_peak_34669_lociStitched (+81410), 15_MACS_peak_34695_lociStitched (+289385)
FOXL1	18_MACS_peak_16698_lociStitched (+10338)
FOXN3	6_MACS_peak_13399_lociStitched (+199302), 14_MACS_peak_13381_lociStitched (+377973)
FOXO3	16_MACS_peak_36178_lociStitched (+26980)
FOXP1	32_MACS_peak_28520_lociStitched (-5801)
FOXS1	7_MACS_peak_24954_lociStitched (+19166)
FPGS	10_MACS_peak_42645_lociStitched (+49191)
FRMD8	8_MACS_peak_8056_lociStitched (+49485), 13_MACS_peak_8071_lociStitched (+103014)
FSCN1	12_MACS_peak_37295_lociStitched (+98006)
FSTL1	18_MACS_peak_28974_lociStitched (+18228)
FTH1	4_MACS_peak_7917_lociStitched (-2742)
FYCO1	10_MACS_peak_28001_lociStitched (+25596)
G6PC3	9_MACS_peak_17821_lociStitched (+34614)
GADD45A	42_MACS_peak_1898_lociStitched (+77738)
GALNT18	8_MACS_peak_7217_lociStitched (+45845)
GALNT2	10_MACS_peak_4081_lociStitched (+26421), 16_MACS_peak_4102_lociStitched (+161114)
GAPDH	3_MACS_peak_9408_lociStitched (+10254)
GATA6	17_MACS_peak_18922_lociStitched (+17949)
GCH1	17_MACS_peak_12765_lociStitched (+142724), 22_MACS_peak_12747_lociStitched (+208661)
GFPT1	64_MACS_peak_22345_lociStitched (+262767)
GJD3	7_MACS_peak_17684_lociStitched (+35518)
GLIS2	9_MACS_peak_15484_lociStitched (-4614)
GLRX5	8_MACS_peak_13578_lociStitched (-27680)
GLUD1	MACS_peak_5939 (+125266)
GMDS	5_MACS_peak_34726_lociStitched (-380298), 15_MACS_peak_34695_lociStitched (+345860), 5_MACS_peak_34669_lociStitched (+553835), 7_MACS_peak_34667_lociStitched (+630316)
GMPPA	12_MACS_peak_24107_lociStitched (-37415)
GMPR	18_MACS_peak_35028_lociStitched (-17050)
GNAI2	8_MACS_peak_28145_lociStitched (+13114)
GNAT1	2_MACS_peak_28141_lociStitched (-28626)
GNG12	42_MACS_peak_1898_lociStitched (+70668)
GNRH1	19_MACS_peak_39445_lociStitched (+53523)
GNS	22_MACS_peak_10426_lociStitched (+103649)
GORASP1	2_MACS_peak_27857_lociStitched (-39779)
GPATCH2L	10_MACS_peak_13296_lociStitched (-155547)
GPC1	4_MACS_peak_24513_lociStitched (-188018)
GPR135	16_MACS_peak_12849_lociStitched (+139963)
GPR156	18_MACS_peak_28974_lociStitched (-147931)
GPR17	5_MACS_peak_23033_lociStitched (+8193)
GPR26	9_MACS_peak_6801_lociStitched (+207730)
GPRC5A	8_MACS_peak_9584_lociStitched (+3346)
GPRC5C	7_MACS_peak_18407_lociStitched (+10062)
GPRC5D	8_MACS_peak_9584_lociStitched (+56256)
GRK5	15_MACS_peak_6706_lociStitched (+25129), 3_MACS_peak_6720_lociStitched (+102034)
GRTP1	5_MACS_peak_12331_lociStitched (-43107)
GSN	29_MACS_peak_42452_lociStitched (+20567)
GTDC1	13_MACS_peak_23119_lociStitched (-210280)
H2AFY	4_MACS_peak_33781_lociStitched (+161116)
HAAO	5_MACS_peak_21880_lociStitched (-429845), 10_MACS_peak_21870_lociStitched (-298183), 13_MACS_peak_21855_lociStitched (-143716)
HABP2	21_MACS_peak_6628_lociStitched (-509596), 6_MACS_peak_6644_lociStitched (-67860)
HAND2	9_MACS_peak_32177_lociStitched (+6151)
HAPLN3	6_MACS_peak_14962_lociStitched (-12221)
HCRTR1	6_MACS_peak_944_lociStitched (-36808), 7_MACS_peak_952_lociStitched (+15429)
HDAC5	9_MACS_peak_17821_lociStitched (+18289)
HDAC7	8_MACS_peak_10071_lociStitched (+6135)
HEATR2	17_MACS_peak_37183_lociStitched (+93636)
HECTD2	15_MACS_peak_6077_lociStitched (+200357)
HEG1	7_MACS_peak_29249_lociStitched (+4737)
HEY2	8_MACS_peak_36417_lociStitched (+13750)
HEYL	8_MACS_peak_1189_lociStitched (+2118)
HFE2	10_MACS_peak_2510_lociStitched (-185220)
HIST2H3A	3_MACS_peak_2579_lociStitched (+4799)
HIST2H4B	3_MACS_peak_2579_lociStitched (+3734)
HK1	15_MACS_peak_5542_lociStitched (+65600)
HLF	13_MACS_peak_18094_lociStitched (+15727)
HMCN2	5_MACS_peak_42793_lociStitched (-343216)
HMG20B	4_MACS_peak_19639_lociStitched (+28848)
HNRNPUL1	3_MACS_peak_20489_lociStitched (+47923)
HOXA2	6_MACS_peak_37487_lociStitched (-8113)
HOXA3	6_MACS_peak_37487_lociStitched (+8671)
HRCT1	9_MACS_peak_41408_lociStitched (+18809)
HRH1	23_MACS_peak_27191_lociStitched (-85787)
HS1BP3	15_MACS_peak_21211_lociStitched (+27918)
HSP90AB1	6_MACS_peak_35714_lociStitched (-15303)
HSPA8	21_MACS_peak_9033_lociStitched (-95226)
HSPB1	13_MACS_peak_38172_lociStitched (+13563)
HSPB2-C11orf52	MACS_peak_8737 (-471)
HSPB7	1_MACS_peak_486_lociStitched (+1602)
HSPG2	12_MACS_peak_688_lociStitched (+12000)
HTR2B	10_MACS_peak_24295_lociStitched (-79436)
HTRA1	8_MACS_peak_6786_lociStitched (+21405)
HTRA4	6_MACS_peak_39737_lociStitched (-54347)
ID2	2_MACS_peak_21011_lociStitched (+2026)
ID3	9_MACS_peak_720_lociStitched (-7626)
IER2	6_MACS_peak_19928_lociStitched (+10872)
IER3	10_MACS_peak_35356_lociStitched (-17392)
IFFO1	3_MACS_peak_9408_lociStitched (+11892)
IFFO2	2_MACS_peak_579_lociStitched (+4987), 7_MACS_peak_572_lociStitched (+36424)
IFITM1	2_MACS_peak_6916_lociStitched (+1812)
IFITM3	2_MACS_peak_6916_lociStitched (+5385)
IFT140	5_MACS_peak_15382_lociStitched (+70681)
IFT43	10_MACS_peak_13296_lociStitched (+10607)
IGF1R	31_MACS_peak_15230_lociStitched (+240369), 2_MACS_peak_15250_lociStitched (+301260)
IGFBP2	20_MACS_peak_23912_lociStitched (-86433), 25_MACS_peak_23920_lociStitched (+33433)
IGFBP5	25_MACS_peak_23920_lociStitched (+28697)
IGFBP6	6_MACS_peak_10190_lociStitched (-41113)
IGFBP7	42_MACS_peak_30987_lociStitched (+31640)
IGLL1	12_MACS_peak_26323_lociStitched (+347888)
IL12B	12_MACS_peak_34383_lociStitched (-439964)
IL17B	MACS_peak_34092 (-28335), 6_MACS_peak_34086_lociStitched (+367)
IL18BP	3_MACS_peak_8269_lociStitched (+28137)
IMP3	3_MACS_peak_14726_lociStitched (-56511), 5_MACS_peak_14724_lociStitched (-9098)
INMT-FAM188B	16_MACS_peak_37554_lociStitched (+32040)
INPP5A	9_MACS_peak_6902_lociStitched (+45374), 3_MACS_peak_6904_lociStitched (+92129)
INPP5J	4_MACS_peak_26558_lociStitched (-28957)
INTS3	5_MACS_peak_2692_lociStitched (-39387), 9_MACS_peak_2705_lociStitched (+32052)
IPO9	26_MACS_peak_3432_lociStitched (-77653)
IPPK	8_MACS_peak_41822_lociStitched (+56656)
IQCJ-SCHIP1	20_MACS_peak_29799_lociStitched (+714118)
IQSEC1	6_MACS_peak_27292_lociStitched (+16426)
IRAK2	5_MACS_peak_27174_lociStitched (+24906)
IRF1	10_MACS_peak_33710_lociStitched (+64061)
IRF2BP2	13_MACS_peak_4194_lociStitched (-367481), 6_MACS_peak_4191_lociStitched (-313344), 3_MACS_peak_4180_lociStitched (-112579), 15_MACS_peak_4173_lociStitched (+6309), 7_MACS_peak_4156_lociStitched (+75999)
IRF2BPL	5_MACS_peak_13327_lociStitched (-10609)
ISCA2	26_MACS_peak_13235_lociStitched (+113795)
ITGA11	12_MACS_peak_14525_lociStitched (-61982), 16_MACS_peak_14518_lociStitched (+84524)
ITGA3	3_MACS_peak_18035_lociStitched (+15063)
ITGA9	15_MACS_peak_27782_lociStitched (+142351), 16_MACS_peak_27797_lociStitched (+226891)
ITGB1BP1	16_MACS_peak_21045_lociStitched (+108654), 13_MACS_peak_21035_lociStitched (+185741)
ITGB5	35_MACS_peak_29236_lociStitched (+66413)
ITPKB	7_MACS_peak_3986_lociStitched (+70317)
JAG1	32_MACS_peak_24708_lociStitched (+60697)
JAK2	15_MACS_peak_41065_lociStitched (-122559)
JPH2	18_MACS_peak_25223_lociStitched (+36302)
JUN	4_MACS_peak_1564_lociStitched (+4545)
JUNB	4_MACS_peak_19898_lociStitched (-4253)
JUND	9_MACS_peak_20147_lociStitched (-15155)
KALRN	22_MACS_peak_29133_lociStitched (+17314), 17_MACS_peak_29172_lociStitched (+178275)
KANK1	42_MACS_peak_40983_lociStitched (+249721)
KANK2	20_MACS_peak_19834_lociStitched (+26119)
KANSL3	5_MACS_peak_22630_lociStitched (+99807)
KBTBD13	9_MACS_peak_14400_lociStitched (-1214)
KCNA5	13_MACS_peak_9351_lociStitched (+11427)
KCNB1	24_MACS_peak_25395_lociStitched (-73405)
KCNJ12	2_MACS_peak_17387_lociStitched (-89970)
KCNJ15	40_MACS_peak_25925_lociStitched (+208596), 20_MACS_peak_25942_lociStitched (+348689)
KCNK15	14_MACS_peak_25246_lociStitched (-26978)
KCNMA1	16_MACS_peak_5810_lociStitched (+97690), 10_MACS_peak_5790_lociStitched (+226262)
KCNQ4	8_MACS_peak_1227_lociStitched (+16697)
KCTD10	5_MACS_peak_10971_lociStitched (+15586)
KCTD21	9_MACS_peak_8385_lociStitched (+12791)
KIAA1462	10_MACS_peak_5022_lociStitched (+191950), 8_MACS_peak_5015_lociStitched (+259202)
KIAA1967	5_MACS_peak_39375_lociStitched (+53720)
KIDINS220	2_MACS_peak_21011_lociStitched (+156754)
KIRREL	10_MACS_peak_2840_lociStitched (+15763)
KIT	3_MACS_peak_30931_lociStitched (-426343)
KLF10	1_MACS_peak_40370_lociStitched (-151819), 13_MACS_peak_40360_lociStitched (-102596)
KLF13	5_MACS_peak_13820_lociStitched (+19659)
KLF14	13_MACS_peak_38759_lociStitched (-172581)
KLF2	8_MACS_peak_20062_lociStitched (+3210)
KLF6	4_MACS_peak_4387_lociStitched (+6285)
KLF7	13_MACS_peak_23816_lociStitched (+17458)
KLF9	8_MACS_peak_41545_lociStitched (-179187), 5_MACS_peak_41527_lociStitched (+1642)
KLHL21	4_MACS_peak_133_lociStitched (+7143)
KLHL38	11_MACS_peak_40686_lociStitched (-2965)
KREMEN1	12_MACS_peak_26488_lociStitched (-154859)
KRT7	7_MACS_peak_10181_lociStitched (+125)
LACTB	15_MACS_peak_14346_lociStitched (-64102)
LAMA5	5_MACS_peak_25595_lociStitched (+2298)
LAMC2	11_MACS_peak_3273_lociStitched (+118567)
LASP1	13_MACS_peak_17627_lociStitched (+27309)
LAX1	6_MACS_peak_3588_lociStitched (-84395)
LBH	11_MACS_peak_21434_lociStitched (+14325)
LCLAT1	11_MACS_peak_21434_lociStitched (-201401), 2_MACS_peak_21462_lociStitched (+245166)
LDB3	4_MACS_peak_5909_lociStitched (+20895)
LDLRAD2	12_MACS_peak_688_lociStitched (+113032)
LDLRAP1	5_MACS_peak_795_lociStitched (+13033)
LETM2	6_MACS_peak_39702_lociStitched (+72803)
LGMN	15_MACS_peak_13531_lociStitched (+173397)
LGR6	23_MACS_peak_3481_lociStitched (+58694)
LHFPL2	12_MACS_peak_33181_lociStitched (+122032)
LIMD1	8_MACS_peak_27985_lociStitched (+10864)
LIMS2	5_MACS_peak_23033_lociStitched (+10488)
LINGO1	4_MACS_peak_14761_lociStitched (-252253)
LMCD1	8_MACS_peak_27092_lociStitched (-48137)
LMNA	13_MACS_peak_2801_lociStitched (+5334)
LMOD1	19_MACS_peak_3471_lociStitched (+31591)
LOXL1	6_MACS_peak_14661_lociStitched (+11594)
LOXL2	6_MACS_peak_39407_lociStitched (+66369)
LPP	73_MACS_peak_30196_lociStitched (+48514)
LRIG1	15_MACS_peak_28420_lociStitched (+30983), 6_MACS_peak_28411_lociStitched (+91914)
LRP1	7_MACS_peak_10333_lociStitched (+11674)
LRP5	13_MACS_peak_8174_lociStitched (+35272)
LRRC16A	18_MACS_peak_35195_lociStitched (+22124)
LRRC32	5_MACS_peak_8358_lociStitched (+52611)
LRRC8A	12_MACS_peak_42702_lociStitched (+16133)
LRRFIP1	35_MACS_peak_24402_lociStitched (-29213)
LRRK1	10_MACS_peak_15323_lociStitched (+268296)
LRRTM2	11_MACS_peak_33861_lociStitched (-250859)
LRSAM1	20_MACS_peak_42618_lociStitched (+85886)
LRTOMT	3_MACS_peak_8269_lociStitched (-53136)
LSM3	7_MACS_peak_27305_lociStitched (-41837)
LSM4	9_MACS_peak_20147_lociStitched (+26497)
LSMEM2	8_MACS_peak_28145_lociStitched (-29960)
LTBP1	101_MACS_peak_21522_lociStitched (+235394)
LTBP2	26_MACS_peak_13235_lociStitched (+4816)
LYL1	17_MACS_peak_19909_lociStitched (+54513)
LYVE1	42_MACS_peak_7171_lociStitched (-65253)
LYZL1	40_MACS_peak_4972_lociStitched (+369882)
LYZL2	7_MACS_peak_5057_lociStitched (+189926)
LZTS2	1_MACS_peak_6402_lociStitched (+911)
MACF1	15_MACS_peak_1157_lociStitched (+90974), 15_MACS_peak_1170_lociStitched (+303226)
MAFF	14_MACS_peak_26748_lociStitched (+42020)
MAFK	2_MACS_peak_37215_lociStitched (+4879)
MAN1C1	5_MACS_peak_795_lociStitched (-60855)
MANBAL	13_MACS_peak_25109_lociStitched (+14263)
MAP1B	48_MACS_peak_33016_lociStitched (+53196)
MAP2K3	2_MACS_peak_17387_lociStitched (+1555)
MAP3K8	7_MACS_peak_5057_lociStitched (+5899)
MAP6	5_MACS_peak_8344_lociStitched (+100439)
MAP7D3	27_MACS_peak_43867_lociStitched (+66407)
MAPK11	4_MACS_peak_27019_lociStitched (-30821)
MARVELD1	5_MACS_peak_6364_lociStitched (+3475)
MATN4	MACS_peak_25267 (-34292)
MBNL2	16_MACS_peak_12039_lociStitched (+31245)
MBOAT2	8_MACS_peak_21021_lociStitched (-174857)
MCAM	4_MACS_peak_8914_lociStitched (+3722)
MCL1	13_MACS_peak_2618_lociStitched (+24752)
MEAF6	3_MACS_peak_1115_lociStitched (+35737)
MECOM	7_MACS_peak_29849_lociStitched (-513655)
MED15	4_MACS_peak_26278_lociStitched (+52107)
MED21	11_MACS_peak_9842_lociStitched (+167241)
MED30	81_MACS_peak_40539_lociStitched (+431582)
MEDAG	7_MACS_peak_11534_lociStitched (-33866), 4_MACS_peak_11536_lociStitched (-4244)
MEF2A	5_MACS_peak_15258_lociStitched (-449718), 5_MACS_peak_15277_lociStitched (-125278)
MEF2D	12_MACS_peak_2813_lociStitched (+17001)
MEGF6	4_MACS_peak_115_lociStitched (+73028)
MEIS1	5_MACS_peak_22245_lociStitched (+4586)
METRNL	7_MACS_peak_18674_lociStitched (+15724)
METTL21D	8_MACS_peak_12625_lociStitched (+126979)
MFAP4	3_MACS_peak_17320_lociStitched (-3464)
MFGE8	6_MACS_peak_14962_lociStitched (+5564)
MFSD6L	23_MACS_peak_17092_lociStitched (+120983)
MGLL	5_MACS_peak_29299_lociStitched (+121716)
MICAL2	5_MACS_peak_7238_lociStitched (-30679), 46_MACS_peak_7259_lociStitched (+89095)
MICAL3	4_MACS_peak_26210_lociStitched (+178980)
MICALCL	46_MACS_peak_7259_lociStitched (-87214)
MKLN1	13_MACS_peak_38759_lociStitched (-421150)
MMD	13_MACS_peak_18094_lociStitched (+141253)
MN1	13_MACS_peak_26454_lociStitched (-143)
MNT	5_MACS_peak_16866_lociStitched (-1134)
MOB2	1_MACS_peak_6951_lociStitched (+3159)
MOCS1	2_MACS_peak_35639_lociStitched (+42798), 18_MACS_peak_35624_lociStitched (+95930)
MPG	4_MACS_peak_15343_lociStitched (+612)
MRGPRD	4_MACS_peak_8203_lociStitched (-26082)
MRGPRF	4_MACS_peak_8203_lociStitched (+6340)
MRPL33	11_MACS_peak_21348_lociStitched (-51323)
MRPS23	12_MACS_peak_18152_lociStitched (-36720)
MRPS27	48_MACS_peak_33016_lociStitched (+159831)
MRVI1	42_MACS_peak_7171_lociStitched (+59808)
MSI2	8_MACS_peak_18120_lociStitched (-156061)
MSL1	7_MACS_peak_17679_lociStitched (-14554)
MSN	13_MACS_peak_43472_lociStitched (+21275)
MTERFD2	3_MACS_peak_24525_lociStitched (+101375)
MTPN	6_MACS_peak_38942_lociStitched (+220529)
MTSS1L	8_MACS_peak_16410_lociStitched (-32418)
MUC13	7_MACS_peak_29249_lociStitched (-116470)
MXRA7	10_MACS_peak_18482_lociStitched (+16923)
MYBL1	10_MACS_peak_39960_lociStitched (+90915)
MYBPHL	19_MACS_peak_2241_lociStitched (-70006)
MYH10	23_MACS_peak_17092_lociStitched (-47605), 73_MACS_peak_17072_lociStitched (+85298)
MYH11	44_MACS_peak_15701_lociStitched (+52752)
MYH9	8_MACS_peak_26695_lociStitched (-74051), 29_MACS_peak_26682_lociStitched (+55203)
MYL9	11_MACS_peak_25060_lociStitched (-61126), 5_MACS_peak_25074_lociStitched (-3140)
MYLIP	18_MACS_peak_35028_lociStitched (+92405)
MYLK	51_MACS_peak_29061_lociStitched (+171744)
MYLK2	7_MACS_peak_24954_lociStitched (+7143)
MYLK4	5_MACS_peak_34726_lociStitched (+124976)
MYO18B	6_MACS_peak_26412_lociStitched (+6900)
MYO1C	2_MACS_peak_16826_lociStitched (+627)
MYO1H	5_MACS_peak_10971_lociStitched (+114055)
MYO9B	20_MACS_peak_20090_lociStitched (+35075)
MYOF	20_MACS_peak_6132_lociStitched (+35054)
MYOM3	14_MACS_peak_749_lociStitched (+112143)
MYOZ2	57_MACS_peak_31565_lociStitched (-164242)
MYOZ3	18_MACS_peak_34167_lociStitched (-28489)
MYSM1	4_MACS_peak_1564_lociStitched (-79476)
MYT1L	8_MACS_peak_20973_lociStitched (+510446)
NAA20	8_MACS_peak_24840_lociStitched (-28424)
NAGLU	7_MACS_peak_17743_lociStitched (-12688)
NANOS3	MACS_peak_19952 (-35449)
NARS	15_MACS_peak_19325_lociStitched (-171250)
NAV1	26_MACS_peak_3432_lociStitched (+103239)
NAV2	18_MACS_peak_7395_lociStitched (-110124), 38_MACS_peak_7440_lociStitched (+31098), 30_MACS_peak_7467_lociStitched (+177541), 27_MACS_peak_7512_lociStitched (+363288)
NBEAL2	6_MACS_peak_28020_lociStitched (-36624)
NBPF3	11_MACS_peak_658_lociStitched (-113554)
NBPF9	6_MACS_peak_2474_lociStitched (-112838), 8_MACS_peak_2481_lociStitched (+167365)
NCOA7	8_MACS_peak_36417_lociStitched (-17831)
NCOR2	8_MACS_peak_11307_lociStitched (-183027), 4_MACS_peak_11284_lociStitched (+113323)
NCS1	5_MACS_peak_42793_lociStitched (+7875)
NDE1	44_MACS_peak_15701_lociStitched (+160992)
NDEL1	73_MACS_peak_17072_lociStitched (+109602)
NDFIP1	9_MACS_peak_33951_lociStitched (+194892)
NDRG1	6_MACS_peak_40783_lociStitched (-257968)
NDST1	14_MACS_peak_34149_lociStitched (+14059)
NDST2	9_MACS_peak_5664_lociStitched (-51239)
NEDD9	25_MACS_peak_34895_lociStitched (-4706)
NEK6	6_MACS_peak_42551_lociStitched (+14487)
NEURL	7_MACS_peak_6481_lociStitched (+147375)
NEURL1B	17_MACS_peak_34484_lociStitched (+115533)
NFIA	26_MACS_peak_1661_lociStitched (+93247)
NFIB	8_MACS_peak_41166_lociStitched (-41090)
NFIC	11_MACS_peak_19625_lociStitched (+18608), 4_MACS_peak_19631_lociStitched (+92876)
NFIX	17_MACS_peak_19909_lociStitched (+52746)
NINJ2	9_MACS_peak_9206_lociStitched (+195784)
NIPA2	13_MACS_peak_13729_lociStitched (+111551)
NKD1	10_MACS_peak_16120_lociStitched (+33237)
NKX6-2	3_MACS_peak_6904_lociStitched (+156103), 9_MACS_peak_6902_lociStitched (+202858)
NMNAT2	11_MACS_peak_3273_lociStitched (+113747)
NMUR1	6_MACS_peak_24316_lociStitched (-141381), 7_MACS_peak_24310_lociStitched (-93468)
NNMT	36_MACS_peak_8791_lociStitched (-127763), 12_MACS_peak_8832_lociStitched (+43804)
NOA1	42_MACS_peak_30987_lociStitched (-99922)
NOTCH2	11_MACS_peak_2449_lociStitched (+18895)
NOTCH2NL	10_MACS_peak_2510_lociStitched (+3459)
NPLOC4	5_MACS_peak_18614_lociStitched (+72018)
NPR1	5_MACS_peak_2692_lociStitched (+10043)
NR1D1	7_MACS_peak_17679_lociStitched (-7335), 2_MACS_peak_17669_lociStitched (+30365)
NR1D2	22_MACS_peak_27493_lociStitched (+293242)
NR2F2	7_MACS_peak_15180_lociStitched (+7356)
NR3C2	21_MACS_peak_31891_lociStitched (+605669)
NR4A1	7_MACS_peak_10166_lociStitched (+16795)
NRF1	16_MACS_peak_38734_lociStitched (+236346)
NT5C1B-RDH14	2_MACS_peak_21169_lociStitched (-784503)
NTF3	13_MACS_peak_9351_lociStitched (-376767), 8_MACS_peak_9363_lociStitched (+15935)
NTHL1	2_MACS_peak_15404_lociStitched (-77051)
NTMT1	2_MACS_peak_42712_lociStitched (-466685), 5_MACS_peak_42722_lociStitched (-282699), 11_MACS_peak_42736_lociStitched (-129154)
NTN1	7_MACS_peak_17125_lociStitched (+209981)
NUAK1	28_MACS_peak_10866_lociStitched (+28909)
NUFIP1	8_MACS_peak_11775_lociStitched (+71331)
NXPH3	26_MACS_peak_17983_lociStitched (+31372)
NXPH4	7_MACS_peak_10333_lociStitched (-76622)
NXT1	7_MACS_peak_24869_lociStitched (-198474)
OLA1	11_MACS_peak_23390_lociStitched (+245044)
OPTC	8_MACS_peak_3575_lociStitched (+68705)
OR2S2	9_MACS_peak_41408_lociStitched (+33153)
ORM1	8_MACS_peak_42314_lociStitched (-152259)
ORM2	9_MACS_peak_42329_lociStitched (+52256)
OSBPL5	4_MACS_peak_6991_lociStitched (+7428)
OSR1	2_MACS_peak_21187_lociStitched (-502615), 7_MACS_peak_21179_lociStitched (-445984), 2_MACS_peak_21169_lociStitched (+1346)
OTOS	4_MACS_peak_24513_lociStitched (-103091)
OTUD7A	5_MACS_peak_13820_lociStitched (+308825)
P2RY2	5_MACS_peak_8291_lociStitched (-68596)
PABPC4	8_MACS_peak_1189_lociStitched (-61426)
PACSIN2	11_MACS_peak_26925_lociStitched (+29192), 14_MACS_peak_26908_lociStitched (+88926)
PALLD	32_MACS_peak_32118_lociStitched (+366989)
PCBP3	7_MACS_peak_26171_lociStitched (+327833)
PCDHGC5	3_MACS_peak_33914_lociStitched (+28299)
PCSK7	6_MACS_peak_8861_lociStitched (+22166)
PDCD4	14_MACS_peak_6584_lociStitched (-61500)
PDE4DIP	3_MACS_peak_2499_lociStitched (-138773), 8_MACS_peak_2481_lociStitched (+15909)
PDE6D	3_MACS_peak_24321_lociStitched (+69521)
PDE8A	6_MACS_peak_14876_lociStitched (-64724)
PDGFA	3_MACS_peak_37169_lociStitched (-77311), 7_MACS_peak_37161_lociStitched (-2131)
PDGFRA	3_MACS_peak_30931_lociStitched (+2478)
PDGFRB	9_MACS_peak_34130_lociStitched (+283)
PDK2	3_MACS_peak_18035_lociStitched (-23772)
PDLIM1	116_MACS_peak_6218_lociStitched (-108530)
PDLIM3	24_MACS_peak_32283_lociStitched (-21915)
PDLIM4	4_MACS_peak_33699_lociStitched (+2162)
PDLIM7	3_MACS_peak_34592_lociStitched (+8949)
PEF1	7_MACS_peak_952_lociStitched (+11758)
PEX14	4_MACS_peak_325_lociStitched (+160371)
PFKFB3	14_MACS_peak_4523_lociStitched (+16642)
PGBD5	16_MACS_peak_4102_lociStitched (+149321), 10_MACS_peak_4081_lociStitched (+284014)
PGPEP1L	2_MACS_peak_15250_lociStitched (+55331), 31_MACS_peak_15230_lociStitched (+116222)
PHF15	6_MACS_peak_33768_lociStitched (+14077)
PHKA2	3_MACS_peak_43125_lociStitched (+99999)
PHLDA3	8_MACS_peak_3408_lociStitched (-27463)
PHLDB1	11_MACS_peak_8884_lociStitched (+19573)
PHYHD1	12_MACS_peak_42702_lociStitched (-22773)
PIGT	2_MACS_peak_25274_lociStitched (-3552)
PIGV	5_MACS_peak_830_lociStitched (-10223)
PIK3C2B	11_MACS_peak_3612_lociStitched (+20537)
PIP5K1C	2_MACS_peak_19642_lociStitched (+29779)
PITRM1	4_MACS_peak_4387_lociStitched (-606179)
PITX1	4_MACS_peak_33781_lociStitched (-204208)
PKD1	2_MACS_peak_15404_lociStitched (+10981)
PKDCC	5_MACS_peak_21817_lociStitched (+7103)
PKIG	8_MACS_peak_25238_lociStitched (+62961)
PLAC9	7_MACS_peak_5883_lociStitched (+27103), 7_MACS_peak_5887_lociStitched (+68478)
PLB1	4_MACS_peak_21389_lociStitched (-93710), 21_MACS_peak_21413_lociStitched (+137805), 11_MACS_peak_21418_lociStitched (+241933)
PLCB2	5_MACS_peak_13910_lociStitched (-25582)
PLCG1	7_MACS_peak_25185_lociStitched (+99860)
PLEC	2_MACS_peak_40891_lociStitched (+5274)
PLEKHA1	8_MACS_peak_6768_lociStitched (-248551)
PLEKHA2	6_MACS_peak_39737_lociStitched (+18583)
PLEKHF1	4_MACS_peak_20248_lociStitched (+8816)
PLEKHG3	12_MACS_peak_12967_lociStitched (+17816)
PLEKHG6	3_MACS_peak_9398_lociStitched (+25007)
PLEKHH2	20_MACS_peak_21888_lociStitched (-314554)
PLEKHH3	5_MACS_peak_17761_lociStitched (+9821)
PLEKHO1	4_MACS_peak_2592_lociStitched (+7451)
PLGLB1	4_MACS_peak_22585_lociStitched (-511185)
PLGLB2	4_MACS_peak_22585_lociStitched (-287446)
PLLP	6_MACS_peak_16196_lociStitched (-24154)
PLN	23_MACS_peak_36326_lociStitched (-241832)
PLXDC1	13_MACS_peak_17627_lociStitched (+254481)
PLXNA1	6_MACS_peak_29283_lociStitched (+13580)
PLXNA2	13_MACS_peak_3709_lociStitched (+17037)
PLXNB1	5_MACS_peak_28059_lociStitched (+10637)
PLXNB2	4_MACS_peak_27019_lociStitched (+6413)
PLXND1	7_MACS_peak_29369_lociStitched (-3922)
PMEPA1	9_MACS_peak_25535_lociStitched (+9883)
PMFBP1	7_MACS_peak_16433_lociStitched (-674947)
PMM1	5_MACS_peak_26865_lociStitched (+26734)
PNMA1	13_MACS_peak_13197_lociStitched (-39460)
POC1A	5_MACS_peak_28188_lociStitched (+84867)
POFUT2	8_MACS_peak_26164_lociStitched (-133852), 5_MACS_peak_26151_lociStitched (-20441)
POLM	5_MACS_peak_37744_lociStitched (-10006)
POLR3E	9_MACS_peak_15852_lociStitched (-86384)
PPARA	MACS_peak_26986 (-75967), MACS_peak_26988 (-62108)
PPEF1	3_MACS_peak_43125_lociStitched (+193685)
PPIAL4B	6_MACS_peak_2474_lociStitched (-334664)
PPIF	3_MACS_peak_5859_lociStitched (-197309)
PPP1CB	21_MACS_peak_21413_lociStitched (-117976), 11_MACS_peak_21418_lociStitched (-13848)
PPP1R12B	23_MACS_peak_3529_lociStitched (+240221)
PPP1R15B	11_MACS_peak_3612_lociStitched (-58096)
PPP1R18	2_MACS_peak_35344_lociStitched (+2780)
PPP1R3C	15_MACS_peak_6077_lociStitched (+22352)
PPP2R1B	6_MACS_peak_8730_lociStitched (+33388)
PPP2R2C	4_MACS_peak_30455_lociStitched (+105281)
PPP2R4	2_MACS_peak_42712_lociStitched (+30881), 5_MACS_peak_42722_lociStitched (+214867), 11_MACS_peak_42736_lociStitched (+368412)
PPP6R3	13_MACS_peak_8174_lociStitched (-112889)
PQLC2	26_MACS_peak_594_lociStitched (+108194)
PRDM11	12_MACS_peak_7754_lociStitched (+34540)
PRDM16	MACS_peak_73 (+3234), MACS_peak_79 (+51943), 14_MACS_peak_85_lociStitched (+127666), 16_MACS_peak_106_lociStitched (+284728)
PRDM6	34_MACS_peak_33599_lociStitched (+45815)
PRELP	11_MACS_peak_3568_lociStitched (-11970)
PREX1	13_MACS_peak_25346_lociStitched (+116726)
PRICKLE2	8_MACS_peak_28364_lociStitched (-452344)
PRKAR1B	3_MACS_peak_37169_lociStitched (+116502)
PRKCQ	14_MACS_peak_4523_lociStitched (+360727)
PRKG1	20_MACS_peak_5319_lociStitched (-54168)
PROKR2	14_MACS_peak_24656_lociStitched (+157066)
PRPS1	10_MACS_peak_43662_lociStitched (+100884)
PRRX2	12_MACS_peak_42755_lociStitched (+44717)
PSD2	3_MACS_peak_33882_lociStitched (-141214)
PSMB7	6_MACS_peak_42551_lociStitched (+142989)
PSMC3	5_MACS_peak_7811_lociStitched (+12466)
PSMG1	10_MACS_peak_25992_lociStitched (+268881), 9_MACS_peak_25975_lociStitched (+369392)
PTCD2	9_MACS_peak_33068_lociStitched (+126308)
PTGES	12_MACS_peak_42755_lociStitched (+42689)
PTGIR	MACS_peak_20629 (+1756)
PTGIS	24_MACS_peak_25395_lociStitched (+12094)
PTH1R	6_MACS_peak_28020_lociStitched (+59702)
PTMA	7_MACS_peak_24310_lociStitched (-84552), 6_MACS_peak_24316_lociStitched (-36639), 3_MACS_peak_24321_lociStitched (+3272)
PTP4A3	3_MACS_peak_40862_lociStitched (+23231)
PTPDC1	10_MACS_peak_41867_lociStitched (+66055)
PTPLB	51_MACS_peak_29061_lociStitched (-127373)
PTPN1	6_MACS_peak_25458_lociStitched (-112121)
PTRF	8_MACS_peak_17737_lociStitched (+8187)
PTTG1IP	3_MACS_peak_26106_lociStitched (+1955)
PXDC1	10_MACS_peak_34770_lociStitched (+7059)
PXDN	8_MACS_peak_20973_lociStitched (-76164), 10_MACS_peak_20956_lociStitched (+17522), 3_MACS_peak_20950_lociStitched (+94072)
PYGB	5_MACS_peak_24893_lociStitched (-15947)
QRFP	13_MACS_peak_42822_lociStitched (+44937)
R3HCC1	6_MACS_peak_39407_lociStitched (+49963)
RAB11FIP4	10_MACS_peak_17487_lociStitched (+182279)
RAB17	35_MACS_peak_24402_lociStitched (-72033)
RAB20	12_MACS_peak_12265_lociStitched (+42643), 92_MACS_peak_12229_lociStitched (+232241)
RAB8A	11_MACS_peak_20041_lociStitched (-31181)
RAD51B	11_MACS_peak_13013_lociStitched (+561270), 4_MACS_peak_13031_lociStitched (+734454)
RAI1	5_MACS_peak_17262_lociStitched (+16817)
RAI14	17_MACS_peak_32571_lociStitched (-173815)
RAMP1	17_MACS_peak_24455_lociStitched (+37354)
RANBP3	19_MACS_peak_19704_lociStitched (-104964)
RAP2A	16_MACS_peak_12039_lociStitched (-180622)
RAPGEF1	4_MACS_peak_42849_lociStitched (+36120)
RARA	7_MACS_peak_17684_lociStitched (+19103)
RASA2	24_MACS_peak_29492_lociStitched (-81051)
RASGRP3	101_MACS_peak_21522_lociStitched (-293862)
RASSF3	22_MACS_peak_10426_lociStitched (+45285)
RBM20	14_MACS_peak_6584_lociStitched (+165910)
RBM7	12_MACS_peak_8832_lociStitched (-98395)
RBPMS	75_MACS_peak_39571_lociStitched (+97208)
RCAN2	35_MACS_peak_35737_lociStitched (+19577)
RCL1	15_MACS_peak_41065_lociStitched (+69817)
RELT	9_MACS_peak_8303_lociStitched (-36329)
RER1	3_MACS_peak_56_lociStitched (-74736)
RERE	15_MACS_peak_214_lociStitched (+387671), 7_MACS_peak_207_lociStitched (+454559)
REV3L	10_MACS_peak_36264_lociStitched (-95266)
RFX2	19_MACS_peak_19704_lociStitched (+27430)
RGPD3	19_MACS_peak_22810_lociStitched (-370483)
RGS10	3_MACS_peak_6720_lociStitched (+233085), 15_MACS_peak_6706_lociStitched (+309990)
RGS3	44_MACS_peak_42253_lociStitched (+94331)
RHOB	8_MACS_peak_21203_lociStitched (-1102), 15_MACS_peak_21211_lociStitched (+176096)
RHOBTB2	6_MACS_peak_39388_lociStitched (+8882)
RIN2	8_MACS_peak_24840_lociStitched (+102171)
RIN3	15_MACS_peak_13531_lociStitched (+61509)
RLBP1	23_MACS_peak_14986_lociStitched (+106096)
RNF216	12_MACS_peak_37295_lociStitched (+90910)
RNF24	8_MACS_peak_24620_lociStitched (-56096)
ROCK2	9_MACS_peak_21105_lociStitched (-43726)
ROR1	24_MACS_peak_1776_lociStitched (+175399)
RPL10A	4_MACS_peak_35517_lociStitched (+22074)
RPL11	9_MACS_peak_720_lociStitched (-124358)
RPL26L1	27_MACS_peak_34518_lociStitched (-64677)
RPL32	6_MACS_peak_27292_lociStitched (-109655)
RPL37A	20_MACS_peak_23912_lociStitched (+48773)
RPL39L	17_MACS_peak_30091_lociStitched (+182428)
RPRD1B	10_MACS_peak_25135_lociStitched (+114262)
RPS6KA5	7_MACS_peak_13430_lociStitched (+660063)
RRBP1	23_MACS_peak_24787_lociStitched (+103223)
RRN3	1_MACS_peak_15680_lociStitched (-49543)
RTKN2	32_MACS_peak_5461_lociStitched (+228723)
RUSC2	13_MACS_peak_41365_lociStitched (-40374)
RXFP4	8_MACS_peak_2781_lociStitched (+33318)
RYK	14_MACS_peak_29431_lociStitched (-91234)
SACM1L	8_MACS_peak_27985_lociStitched (-83539)
SAMD4A	22_MACS_peak_12747_lociStitched (+126274), 17_MACS_peak_12765_lociStitched (+192211)
SAR1B	6_MACS_peak_33768_lociStitched (+92803)
SCAMP1	12_MACS_peak_33181_lociStitched (+166277)
SCARB1	8_MACS_peak_11307_lociStitched (+185568)
SCGN	18_MACS_peak_35195_lociStitched (-350684)
SCHIP1	20_MACS_peak_29799_lociStitched (-56479)
SCRG1	9_MACS_peak_32177_lociStitched (-124542)
SCXA	3_MACS_peak_40907_lociStitched (+1849)
SCXB	3_MACS_peak_40901_lociStitched (+1799)
SCYL1	8_MACS_peak_8056_lociStitched (-88993), 13_MACS_peak_8071_lociStitched (-35464)
SDC4	MACS_peak_25267 (+5603)
SEC11C	24_MACS_peak_19356_lociStitched (-249497)
SEC22A	27_MACS_peak_29041_lociStitched (+178465)
SELPLG	17_MACS_peak_10923_lociStitched (-50568)
SEMA3F	2_MACS_peak_28141_lociStitched (+7857)
SEMA4A	13_MACS_peak_2801_lociStitched (-33486)
SENP8	15_MACS_peak_14588_lociStitched (-810322)
SEPT10	8_MACS_peak_22861_lociStitched (+308013), 20_MACS_peak_22850_lociStitched (+549052)
SEPT11	58_MACS_peak_31118_lociStitched (-297877), 9_MACS_peak_31165_lociStitched (-204547)
SEPT9	7_MACS_peak_18500_lociStitched (+115811), 1_MACS_peak_18508_lociStitched (+320638)
SERAC1	15_MACS_peak_36966_lociStitched (+133351)
SERPIND1	4_MACS_peak_26278_lociStitched (-214163)
SERPINE1	14_MACS_peak_38444_lociStitched (-9778)
SERPINH1	5_MACS_peak_8344_lociStitched (+6311)
SESN1	16_MACS_peak_36178_lociStitched (+506973)
SETD1B	3_MACS_peak_11185_lociStitched (-1377)
SEZ6L	6_MACS_peak_26412_lociStitched (-420521)
SH3PXD2A	7_MACS_peak_6481_lociStitched (+214053)
SH3RF3	20_MACS_peak_22850_lociStitched (+76734), 8_MACS_peak_22861_lociStitched (+317773)
SHB	5_MACS_peak_41470_lociStitched (-317779), 11_MACS_peak_41457_lociStitched (+26198)
SHISA4	19_MACS_peak_3471_lociStitched (+26288)
SHISA5	2_MACS_peak_28067_lociStitched (+31997)
SHROOM3	58_MACS_peak_31118_lociStitched (+216726), 9_MACS_peak_31165_lociStitched (+310056)
SIK2	6_MACS_peak_8730_lociStitched (+130603)
SIL1	11_MACS_peak_33861_lociStitched (+72249)
SIVA1	4_MACS_peak_13690_lociStitched (-16898)
SIX5	2_MACS_peak_20596_lociStitched (-6107)
SKI	MACS_peak_44 (-19692), MACS_peak_45 (-14882), 3_MACS_peak_56_lociStitched (+88402)
SLC1A2	22_MACS_peak_7664_lociStitched (+253788)
SLC22A23	10_MACS_peak_34770_lociStitched (-288408)
SLC22A3	9_MACS_peak_37038_lociStitched (-4575)
SLC22A4	4_MACS_peak_33699_lociStitched (-34610)
SLC22A5	10_MACS_peak_33710_lociStitched (+56985)
SLC24A6	20_MACS_peak_11070_lociStitched (+102331)
SLC25A25	2_MACS_peak_42661_lociStitched (+28021)
SLC25A26	6_MACS_peak_28411_lociStitched (+340157), 15_MACS_peak_28420_lociStitched (+401088)
SLC25A33	23_MACS_peak_277_lociStitched (-185492)
SLC25A51	11_MACS_peak_41457_lociStitched (-138903)
SLC27A3	9_MACS_peak_2705_lociStitched (-15173)
SLC28A1	8_MACS_peak_14860_lociStitched (-53638), 6_MACS_peak_14876_lociStitched (+31034)
SLC29A1	6_MACS_peak_35714_lociStitched (+8937)
SLC29A4	6_MACS_peak_37277_lociStitched (+135888)
SLC2A1	9_MACS_peak_1272_lociStitched (+15329)
SLC2A9	6_MACS_peak_30531_lociStitched (-79768)
SLC35F1	23_MACS_peak_36326_lociStitched (+398940)
SLC39A13	5_MACS_peak_7811_lociStitched (+5342)
SLC45A1	19_MACS_peak_172_lociStitched (-266754), 8_MACS_peak_196_lociStitched (-190275), 5_MACS_peak_200_lociStitched (-114079), 7_MACS_peak_207_lociStitched (+45079), 15_MACS_peak_214_lociStitched (+111967)
SLC48A1	8_MACS_peak_10071_lociStitched (+40442)
SLC6A1	23_MACS_peak_27191_lociStitched (+174188)
SLC9A3R2	2_MACS_peak_15402_lociStitched (+8359)
SLC9A8	16_MACS_peak_25429_lociStitched (+44862)
SLCO3A1	11_MACS_peak_15091_lociStitched (+97825)
SLX4IP	32_MACS_peak_24708_lociStitched (+178046)
SMAD3	24_MACS_peak_14445_lociStitched (-314438), 8_MACS_peak_14470_lociStitched (-2916)
SMAD6	24_MACS_peak_14445_lociStitched (+49179)
SMAD7	9_MACS_peak_19237_lociStitched (+11840), 10_MACS_peak_19224_lociStitched (+135226)
SMARCD3	MACS_peak_39089 (-338)
SMC5	5_MACS_peak_41527_lociStitched (+153961)
SMIM18	75_MACS_peak_39571_lociStitched (-156882)
SMIM19	20_MACS_peak_39799_lociStitched (-54409)
SMOC2	11_MACS_peak_37107_lociStitched (+109309), 3_MACS_peak_37121_lociStitched (+724160), 7_MACS_peak_37131_lociStitched (+791310)
SMOX	8_MACS_peak_24620_lociStitched (-77114)
SMTN	4_MACS_peak_26558_lociStitched (+12718)
SNED1	3_MACS_peak_24525_lociStitched (+2117)
SNX18	14_MACS_peak_32736_lociStitched (+15385), 33_MACS_peak_32757_lociStitched (+144766)
SNX19	20_MACS_peak_9168_lociStitched (+30488)
SNX20	10_MACS_peak_16120_lociStitched (+99785)
SNX6	2_MACS_peak_12556_lociStitched (+78632)
SOGA1	13_MACS_peak_25088_lociStitched (+22394)
SORBS1	116_MACS_peak_6218_lociStitched (+161824)
SORBS2	24_MACS_peak_32283_lociStitched (+399229)
SORBS3	MACS_peak_39357 (-228)
SORT1	19_MACS_peak_2241_lociStitched (+20904)
SP3	11_MACS_peak_23390_lociStitched (-37952)
SPARC	14_MACS_peak_34202_lociStitched (+5876)
SPATA2	16_MACS_peak_25429_lociStitched (+56164)
SPC24	20_MACS_peak_19834_lociStitched (-15640)
SPECC1	9_MACS_peak_17342_lociStitched (-7110)
SPEG	12_MACS_peak_24107_lociStitched (+26640)
SPEN	7_MACS_peak_478_lociStitched (+99628)
SPINK8	5_MACS_peak_28059_lociStitched (-90404)
SPINT2	12_MACS_peak_20371_lociStitched (-169)
SPOCK2	10_MACS_peak_5596_lociStitched (+98679)
SPOP	26_MACS_peak_17983_lociStitched (+70933)
SPRY4	9_MACS_peak_33951_lociStitched (+21604)
SPSB1	23_MACS_peak_277_lociStitched (+61110)
SPTB	12_MACS_peak_12967_lociStitched (+100896)
SPTBN5	16_MACS_peak_13949_lociStitched (-49358)
SRC	13_MACS_peak_25109_lociStitched (-34995)
SRCIN1	7_MACS_peak_17609_lociStitched (+162167)
SREBF1	5_MACS_peak_17262_lociStitched (+138697)
SRP14	7_MACS_peak_13899_lociStitched (-48925)
SRSF10	14_MACS_peak_749_lociStitched (-19713)
SSBP3	7_MACS_peak_1485_lociStitched (+116409)
SSH1	18_MACS_peak_10960_lociStitched (+41476)
SSTR5	2_MACS_peak_15371_lociStitched (+15311)
ST3GAL1	6_MACS_peak_40783_lociStitched (+16386)
ST3GAL5	12_MACS_peak_22539_lociStitched (+114289)
ST6GAL1	17_MACS_peak_30091_lociStitched (+26609)
ST6GAL2	19_MACS_peak_22810_lociStitched (+47787)
ST6GALNAC1	10_MACS_peak_18482_lociStitched (-50194)
ST8SIA2	11_MACS_peak_15091_lociStitched (-442308)
STAMBPL1	28_MACS_peak_5978_lociStitched (+79364)
STAT3	8_MACS_peak_17737_lociStitched (-26762)
STK11	3_MACS_peak_19531_lociStitched (+6813)
STK17A	12_MACS_peak_37722_lociStitched (+52225)
STK32A	19_MACS_peak_34036_lociStitched (+193569)
STK38L	11_MACS_peak_9842_lociStitched (-54384)
STK40	8_MACS_peak_1104_lociStitched (+19961)
STOM	13_MACS_peak_42484_lociStitched (-112098), 29_MACS_peak_42452_lociStitched (+49845)
STOML1	6_MACS_peak_14661_lociStitched (+54296)
STX8	7_MACS_peak_17125_lociStitched (+344713)
SUFU	8_MACS_peak_6431_lociStitched (+122263)
SULF2	13_MACS_peak_25346_lociStitched (-912364)
SUMO3	3_MACS_peak_26106_lociStitched (-53753)
SUN1	17_MACS_peak_37183_lociStitched (-12164)
SUPT7L	11_MACS_peak_21348_lociStitched (-56585)
SUSD2	7_MACS_peak_26352_lociStitched (-22591)
SUSD5	20_MACS_peak_27692_lociStitched (+72280)
SVIL	10_MACS_peak_5022_lociStitched (-131773), 8_MACS_peak_5015_lociStitched (-64521), 40_MACS_peak_4972_lociStitched (+76858)
SYNE3	8_MACS_peak_13578_lociStitched (-31077)
SYNJ2	15_MACS_peak_36966_lociStitched (+53032)
SYNM	5_MACS_peak_15258_lociStitched (+10901), 5_MACS_peak_15277_lociStitched (+335341)
SYNPO	14_MACS_peak_34149_lociStitched (-78909), 18_MACS_peak_34167_lociStitched (+31313)
SYNPO2	57_MACS_peak_31565_lociStitched (+82701)
SYT13	12_MACS_peak_7754_lociStitched (+104436)
SYT2	23_MACS_peak_3529_lociStitched (+54533)
SYT8	2_MACS_peak_6959_lociStitched (-8461)
TACC2	8_MACS_peak_6768_lociStitched (+136952)
TACR2	15_MACS_peak_5542_lociStitched (+62523)
TAGLN	6_MACS_peak_8861_lociStitched (+8486)
TAGLN2	4_MACS_peak_2857_lociStitched (+7394)
TARBP1	15_MACS_peak_4173_lociStitched (-124113), 7_MACS_peak_4156_lociStitched (-54423)
TATDN2	5_MACS_peak_27174_lociStitched (-58252)
TBC1D10A	6_MACS_peak_26530_lociStitched (+18476)
TBC1D2B	4_MACS_peak_14761_lociStitched (+192909)
TBX2	7_MACS_peak_18248_lociStitched (+5686)
TBX4	7_MACS_peak_18248_lociStitched (-50864)
TBXA2R	4_MACS_peak_19639_lociStitched (+4874)
TC2N	29_MACS_peak_13495_lociStitched (-44554)
TCF7L2	21_MACS_peak_6628_lociStitched (+93180), 6_MACS_peak_6644_lociStitched (+534916)
TCP11	16_MACS_peak_35484_lociStitched (+102489)
TCTEX1D4	MACS_peak_1321 (+318)
TEAD3	4_MACS_peak_35517_lociStitched (+6594)
TEF	2_MACS_peak_26854_lociStitched (+32329)
TENC1	6_MACS_peak_10190_lociStitched (+7383)
TEX29	17_MACS_peak_12308_lociStitched (-118870)
TGFB1	3_MACS_peak_20489_lociStitched (+41657)
TGIF1	1_MACS_peak_18727_lociStitched (-926), 3_MACS_peak_18731_lociStitched (+147410)
TGM2	10_MACS_peak_25135_lociStitched (+17564)
THBS2	7_MACS_peak_37131_lociStitched (+20998), 3_MACS_peak_37121_lociStitched (+88148), 11_MACS_peak_37107_lociStitched (+702999)
THRA	2_MACS_peak_17669_lociStitched (+7550)
THRB	22_MACS_peak_27493_lociStitched (+256273)
THSD4	15_MACS_peak_14588_lociStitched (+209579)
TIMM22	7_MACS_peak_16800_lociStitched (+27613), 9_MACS_peak_16807_lociStitched (+113984)
TIMP2	4_MACS_peak_18555_lociStitched (-3126)
TINAGL1	6_MACS_peak_944_lociStitched (+4357)
TK2	5_MACS_peak_16240_lociStitched (+38931)
TLE1	11_MACS_peak_41680_lociStitched (+91096)
TLN2	22_MACS_peak_14274_lociStitched (-127921), 24_MACS_peak_14301_lociStitched (+18747)
TM2D1	26_MACS_peak_1661_lociStitched (+550314)
TM4SF4	10_MACS_peak_29626_lociStitched (+164781)
TMEM144	15_MACS_peak_32004_lociStitched (-31566)
TMEM167A	19_MACS_peak_33256_lociStitched (+706826)
TMEM184A	2_MACS_peak_37215_lociStitched (+20837)
TMEM184B	14_MACS_peak_26748_lociStitched (+29131)
TMEM204	5_MACS_peak_15382_lociStitched (+7856)
TMEM211	16_MACS_peak_26393_lociStitched (-146787)
TMEM241	9_MACS_peak_18976_lociStitched (+197230)
TMEM242	5_MACS_peak_36933_lociStitched (+197995)
TMEM247	9_MACS_peak_21989_lociStitched (-172962)
TMEM43	7_MACS_peak_27305_lociStitched (+11581)
TNFRSF10B	6_MACS_peak_39388_lociStitched (+72880)
TNFRSF1A	3_MACS_peak_9398_lociStitched (+6174)
TNFRSF1B	26_MACS_peak_391_lociStitched (+300619), 10_MACS_peak_408_lociStitched (+414173)
TNP1	19_MACS_peak_23995_lociStitched (-861875)
TNRC18	6_MACS_peak_37277_lociStitched (+4728)
TNRC6C	7_MACS_peak_18500_lociStitched (-607834), 1_MACS_peak_18508_lociStitched (-403007)
TNS1	36_MACS_peak_24031_lociStitched (+38514), 19_MACS_peak_23995_lociStitched (+222189)
TNS3	14_MACS_peak_37842_lociStitched (-31072), 19_MACS_peak_37815_lociStitched (+53143)
TOB2	2_MACS_peak_26854_lociStitched (+32765)
TOMM20	13_MACS_peak_4194_lociStitched (+179499), 6_MACS_peak_4191_lociStitched (+233636), 3_MACS_peak_4180_lociStitched (+434401)
TOX2	18_MACS_peak_25223_lociStitched (+236424)
TP53BP2	13_MACS_peak_3891_lociStitched (+121579)
TPCN1	20_MACS_peak_11070_lociStitched (+11239)
TPM1	24_MACS_peak_14301_lociStitched (-462573), 15_MACS_peak_14346_lociStitched (+15013)
TPM4	11_MACS_peak_20041_lociStitched (+12910)
TPO	3_MACS_peak_20950_lociStitched (+236973), 10_MACS_peak_20956_lociStitched (+313523)
TPRA1	6_MACS_peak_29283_lociStitched (+588595)
TPRG1	73_MACS_peak_30196_lociStitched (-910528)
TRAF1	20_MACS_peak_42435_lociStitched (-13232)
TRAF3IP2	10_MACS_peak_36264_lociStitched (+27268)
TRAK1	15_MACS_peak_27892_lociStitched (-43886)
TRAM2	11_MACS_peak_35794_lociStitched (+19732), 7_MACS_peak_35784_lociStitched (+66535)
TRAPPC12	6_MACS_peak_20980_lociStitched (+97941)
TRAPPC3	14_MACS_peak_1089_lociStitched (-1264)
TRDMT1	15_MACS_peak_4772_lociStitched (-16601)
TREH	11_MACS_peak_8884_lociStitched (+53653)
TREX1	2_MACS_peak_28067_lociStitched (+2638)
TRIM47	2_MACS_peak_18461_lociStitched (+4387)
TRIM56	14_MACS_peak_38444_lociStitched (+31872)
TRIM8	8_MACS_peak_6431_lociStitched (-18246)
TRPM3	8_MACS_peak_41545_lociStitched (+527787)
TRPM5	6_MACS_peak_6965_lociStitched (+34085)
TSC2	2_MACS_peak_15402_lociStitched (-12238)
TSC22D1	8_MACS_peak_11775_lociStitched (-341586)
TSC22D3	10_MACS_peak_43662_lociStitched (+46396)
TSHB	11_MACS_peak_2343_lociStitched (+51304)
TSPAN2	11_MACS_peak_2343_lociStitched (+8366)
TTC32	2_MACS_peak_21187_lociStitched (+42455), 7_MACS_peak_21179_lociStitched (+99086)
TTC7A	19_MACS_peak_22030_lociStitched (+69965)
TTC8	14_MACS_peak_13381_lociStitched (+416495), 6_MACS_peak_13399_lociStitched (+595166)
TTLL11	9_MACS_peak_42498_lociStitched (+344633)
TUBG2	5_MACS_peak_17761_lociStitched (+7825)
TULP1	4_MACS_peak_35535_lociStitched (-213488)
TXN2	8_MACS_peak_26695_lociStitched (+19963)
TXNRD2	4_MACS_peak_26254_lociStitched (-47606)
UBASH3B	24_MACS_peak_8973_lociStitched (-467443)
UBC	6_MACS_peak_11313_lociStitched (-7533)
UBE2F	17_MACS_peak_24455_lociStitched (-70056)
UBE2H	16_MACS_peak_38734_lociStitched (+104888)
UBE2T	23_MACS_peak_3481_lociStitched (+89385)
UBE2U	24_MACS_peak_1776_lociStitched (-254377)
UBE2V2	2_MACS_peak_39864_lociStitched (+423204), 11_MACS_peak_39872_lociStitched (+520874)
UBE3A	8_MACS_peak_13783_lociStitched (-436207), 9_MACS_peak_13772_lociStitched (-381890), 8_MACS_peak_13764_lociStitched (-321120), 8_MACS_peak_13758_lociStitched (-272635)
UCK1	4_MACS_peak_42849_lociStitched (-142522)
ULK4	15_MACS_peak_27892_lociStitched (-84754)
UMPS	22_MACS_peak_29133_lociStitched (-618371), 17_MACS_peak_29172_lociStitched (-457410), 35_MACS_peak_29236_lociStitched (+90518)
UNC13B	13_MACS_peak_41365_lociStitched (+336196)
UPK2	3_MACS_peak_8894_lociStitched (-35941)
USE1	20_MACS_peak_20090_lociStitched (-104502)
USP47	8_MACS_peak_7230_lociStitched (+154667)
VAC14	8_MACS_peak_16410_lociStitched (+82677)
VASN	4_MACS_peak_15487_lociStitched (+9379)
VCP	2_MACS_peak_41348_lociStitched (+79206)
VDAC3	20_MACS_peak_39799_lociStitched (+92468)
VEZF1	12_MACS_peak_18152_lociStitched (+101376)
VGLL4	25_MACS_peak_27238_lociStitched (+126399)
VIL1	4_MACS_peak_24065_lociStitched (-17842)
VIM	15_MACS_peak_4772_lociStitched (-9976)
VIPR2	3_MACS_peak_39161_lociStitched (+45043), 4_MACS_peak_39155_lociStitched (+123365)
VSIG4	13_MACS_peak_43472_lociStitched (+351137)
WASF2	12_MACS_peak_874_lociStitched (-71779)
WBP1L	12_MACS_peak_6439_lociStitched (+52671)
WBP2	2_MACS_peak_18461_lociStitched (-17681)
WBSCR28	13_MACS_peak_38056_lociStitched (+25549), 29_MACS_peak_38086_lociStitched (+161457)
WDR1	6_MACS_peak_30531_lociStitched (+15609)
WDR60	4_MACS_peak_39155_lociStitched (+165015), 3_MACS_peak_39161_lociStitched (+243337)
WDYHV1	20_MACS_peak_40667_lociStitched (+92800)
WFS1	4_MACS_peak_30455_lociStitched (+6739)
WISP2	14_MACS_peak_25246_lociStitched (+3958)
WNT7B	MACS_peak_26988 (-111382), MACS_peak_26986 (-97523)
WSCD2	12_MACS_peak_10913_lociStitched (+194522)
WWP2	17_MACS_peak_16351_lociStitched (+93953), 6_MACS_peak_16367_lociStitched (+167369)
WWTR1	10_MACS_peak_29626_lociStitched (+64518)
XPNPEP1	10_MACS_peak_6525_lociStitched (+11814)
XRCC6BP1	19_MACS_peak_10368_lociStitched (-73939)
YPEL2	16_MACS_peak_18182_lociStitched (+26709)
YWHAG	13_MACS_peak_38172_lociStitched (+42924)
ZBP1	9_MACS_peak_25535_lociStitched (-79546)		Z-RNA?
ZBTB16	36_MACS_peak_8791_lociStitched (+70475)
ZBTB17	7_MACS_peak_478_lociStitched (+28634)
ZBTB38	24_MACS_peak_29492_lociStitched (+18186)
ZBTB48	4_MACS_peak_133_lociStitched (+15678)
ZC3H12A	3_MACS_peak_1115_lociStitched (+4474)
ZDHHC21	8_MACS_peak_41166_lociStitched (+338713)
ZDHHC22	5_MACS_peak_13327_lociStitched (+102491)
ZEB2	13_MACS_peak_23119_lociStitched (+16281)
ZFHX3	16_MACS_peak_16457_lociStitched (-21223), 7_MACS_peak_16433_lociStitched (+201173)
ZFP36L1	28_MACS_peak_13065_lociStitched (-138063), 4_MACS_peak_13045_lociStitched (-5911), 4_MACS_peak_13031_lociStitched (+238978), 11_MACS_peak_13013_lociStitched (+412162)
ZFP36L2	20_MACS_peak_21888_lociStitched (-96110), 5_MACS_peak_21880_lociStitched (+4171), 10_MACS_peak_21870_lociStitched (+135833), 13_MACS_peak_21855_lociStitched (+290300)
ZFYVE27	5_MACS_peak_6364_lociStitched (-21278)
ZHX3	7_MACS_peak_25185_lociStitched (+62981)
ZMIZ1	3_MACS_peak_5859_lociStitched (+81133)
ZMYND8	14_MACS_peak_25314_lociStitched (+23018)
ZNF169	10_MACS_peak_41867_lociStitched (-108792)
ZNF366	9_MACS_peak_33068_lociStitched (+61052)
ZNF503	3_MACS_peak_5709_lociStitched (-1138)
ZNF532	24_MACS_peak_19356_lociStitched (+27380)
ZNF618	44_MACS_peak_42253_lociStitched (-337220)
ZNF664	4_MACS_peak_11284_lociStitched (+408805)
ZNF691	9_MACS_peak_1272_lociStitched (+96865)
ZNRF3	12_MACS_peak_26488_lociStitched (+34667)
ZRANB1	15_MACS_peak_6849_lociStitched (+82154)
ZSWIM4	MACS_peak_19952 (+46338)
ZYX	2_MACS_peak_39050_lociStitched (+5033)

## Sheet: AORTA RBPs
67 common elements in "RBPs" and "AORTA SEs":
A1CF
AKAP1
AKAP8
BOP1
CACTIN
CARS
CPSF4L
CSDC2
CTIF
DHX16
DHX37
DHX40
EEF1G
EEF2K
EIF4E3
EIF4G3
GAPDH
HNRNPUL1
IMP3
INTS3
IPO9
LRRFIP1
LSM3
LSM4
MBNL2
MRPL33
MRPS23
MRPS27
MSI2
MTERFD2
NANOS3
NARS
NOA1
NUFIP1
NXT1
PABPC4
PCBP3
PDCD4
PTCD2
PTRF
R3HCC1
RBM20
RBM7
RBPMS
RCL1
RPL10A
RPL11
RPL26L1
RPL32
RPL37A
RPL39L
RRBP1
SAMD4A
SETD1B
SMAD3
SMAD6
SMAD7
SPEN
SRP14
SRSF10
TARBP1
TNRC6C
TRDMT1
TRIM56
ZC3H12A
ZFP36L1
ZFP36L2

## Sheet: BLADDER SE genes
# GREAT version 3.0.0	Species assembly: hg19	Association rule: Basal+extension: 5000 bp upstream, 1000 bp downstream, 1000000 bp max extension, curated regulatory domains included
Gene	SE
AAGAB	16_MACS_peak_8614_lociStitched (+132365)
ACTB	1_MACS_peak_22130_lociStitched (+439)
ACTG1	2_MACS_peak_11755_lociStitched (-433)
ACTL8	6_MACS_peak_373_lociStitched (-192837)
ACTN1	9_MACS_peak_7739_lociStitched (+179589)
ACTN4	16_MACS_peak_13238_lociStitched (+22720)
ADAM30	5_MACS_peak_1533_lociStitched (-128766)
ADAMTSL4	5_MACS_peak_1671_lociStitched (+18026)
ADRM1	9_MACS_peak_16340_lociStitched (+63105)
AHDC1	21_MACS_peak_647_lociStitched (+69101)
AHNAK	8_MACS_peak_4588_lociStitched (-2975)
AHRR	9_MACS_peak_19680_lociStitched (+82611)
AKNA	6_MACS_peak_24813_lociStitched (+3751)
ANXA11	6_MACS_peak_3375_lociStitched (+5703)
APOL1	27_MACS_peak_17053_lociStitched (+102334)
APOLD1	4_MACS_peak_5666_lociStitched (-257)
ARHGEF10L	6_MACS_peak_373_lociStitched (+22641)
ARL8B	4_MACS_peak_17428_lociStitched (-138952)
ARNTL	16_MACS_peak_4258_lociStitched (-443818)
ASCC1	13_MACS_peak_3215_lociStitched (-44037)
ATIC	4_MACS_peak_15345_lociStitched (+89026)
ATN1	2_MACS_peak_5590_lociStitched (+6949)
ATP4A	1_MACS_peak_13162_lociStitched (-12070)
ATP6V0A1	5_MACS_peak_10948_lociStitched (+63326)
ATXN10	5_MACS_peak_17315_lociStitched (-161959), 7_MACS_peak_17324_lociStitched (-128434)
B3GNTL1	11_MACS_peak_11827_lociStitched (+187334)
B4GALT1	7_MACS_peak_24308_lociStitched (+8270)
BCL2L1	6_MACS_peak_15934_lociStitched (+12775)
BCL6	4_MACS_peak_18669_lociStitched (+1557)
BCL9L	7_MACS_peak_5259_lociStitched (-9846)
BHLHE40	4_MACS_peak_17428_lociStitched (+4152)
BRD2	1_MACS_peak_21122_lociStitched (-852)
BTBD2	11_MACS_peak_12407_lociStitched (-32738)
BTG2	5_MACS_peak_2242_lociStitched (-22743), 11_MACS_peak_2256_lociStitched (+11389)
C10orf105	12_MACS_peak_3191_lociStitched (-22342)
C10orf54	12_MACS_peak_3191_lociStitched (+31335)
C12orf44	5_MACS_peak_5987_lociStitched (+79664)
C12orf57	2_MACS_peak_5590_lociStitched (-12611)
C19orf77	15_MACS_peak_12485_lociStitched (+94959)
C1orf61	5_MACS_peak_1858_lociStitched (-61117)
C1orf86	5_MACS_peak_75_lociStitched (-7311)
C5orf55	9_MACS_peak_19680_lociStitched (+56356)
CACNA1A	7_MACS_peak_12812_lociStitched (+349379)
CAPN12	16_MACS_peak_13238_lociStitched (+74084)
CAPZB	20_MACS_peak_409_lociStitched (+42980)
CARTPT	1_MACS_peak_19951_lociStitched (+131852)
CASD1	23_MACS_peak_22726_lociStitched (-98642)
CCR7	9_MACS_peak_10880_lociStitched (+19695)
CD1D	6_MACS_peak_1891_lociStitched (-172230)
CD300A	4_MACS_peak_11488_lociStitched (-25786)
CD34	11_MACS_peak_2357_lociStitched (+83955)
CD46	11_MACS_peak_2357_lociStitched (+75390)
CD81	6_MACS_peak_4023_lociStitched (+11633)
CD9	14_MACS_peak_5530_lociStitched (+19528)
CDC42EP2	11_MACS_peak_4706_lociStitched (-12901)
CDC42EP4	9_MACS_peak_11483_lociStitched (+14111)
CDC7	17_MACS_peak_1299_lociStitched (+225875)
CEBPB	6_MACS_peak_16215_lociStitched (+242345)
CEBPD	3_MACS_peak_23670_lociStitched (+2800)
CHIT1	5_MACS_peak_2242_lociStitched (-53122)
CIRBP	9_MACS_peak_12372_lociStitched (-5957)
CLCF1	6_MACS_peak_4824_lociStitched (+11802)
CNN2	5_MACS_peak_12343_lociStitched (-2387)
COL1A1	18_MACS_peak_11172_lociStitched (+5193)
COL1A2	23_MACS_peak_22726_lociStitched (+16595)
COL5A1	8_MACS_peak_25253_lociStitched (-272719), 15_MACS_peak_25262_lociStitched (-225676)
COL6A1	6_MACS_peak_16718_lociStitched (-3362)
COL6A3	3_MACS_peak_15598_lociStitched (+40393), 6_MACS_peak_15590_lociStitched (+88762)
COPS8	6_MACS_peak_15590_lociStitched (+240301), 3_MACS_peak_15598_lociStitched (+288670)
COX4I2	6_MACS_peak_15934_lociStitched (+72235)
CPEB2	1_MACS_peak_18947_lociStitched (+645)
CPSF4L	9_MACS_peak_11483_lociStitched (-36184)
CREB3L1	8_MACS_peak_4418_lociStitched (+7062)
CRELD2	7_MACS_peak_17380_lociStitched (+32767)
CRIP1	4_MACS_peak_8150_lociStitched (-10903)
CRIP2	4_MACS_peak_8150_lociStitched (+2452)
CRISPLD2	14_MACS_peak_9988_lociStitched (+6901), 8_MACS_peak_9998_lociStitched (+179616)
CSNK1A1	12_MACS_peak_20406_lociStitched (+136545)
CSRNP1	4_MACS_peak_17668_lociStitched (+5902)
CSRP1	5_MACS_peak_2156_lociStitched (+6130)
CTAGE1	5_MACS_peak_11984_lociStitched (+240466)
CTDSP1	6_MACS_peak_15435_lociStitched (+2346)
CTIF	9_MACS_peak_12115_lociStitched (+399920)
CTSB	8_MACS_peak_23272_lociStitched (+12517)
CXXC5	8_MACS_peak_20324_lociStitched (+5006)
CYGB	4_MACS_peak_11579_lociStitched (+12188)
CYP26A1	17_MACS_peak_3494_lociStitched (+378707)
DCPS	10_MACS_peak_5400_lociStitched (+38875)
DCST2	6_MACS_peak_1794_lociStitched (+24578)
DDIT4	13_MACS_peak_3215_lociStitched (-13608)
DGKZ	8_MACS_peak_4418_lociStitched (-76871)
DHRS3	6_MACS_peak_270_lociStitched (+12228), 15_MACS_peak_258_lociStitched (+160238)
DHX16	1_MACS_peak_21033_lociStitched (-12665)
DHX37	7_MACS_peak_6757_lociStitched (+62306)
DPM2	9_MACS_peak_25022_lociStitched (-28254)
DTX4	6_MACS_peak_4527_lociStitched (+14107)
DUSP1	9_MACS_peak_20612_lociStitched (-10866)
EAPP	6_MACS_peak_7411_lociStitched (-11847)
ECE1	14_MACS_peak_447_lociStitched (-39523)
EHD2	6_MACS_peak_13561_lociStitched (+17853)
EIF1	6_MACS_peak_10905_lociStitched (-31549)
ELMSAN1	12_MACS_peak_7801_lociStitched (-7133)
ENO3	2_MACS_peak_10327_lociStitched (-2972)
ENSG00000248751	7_MACS_peak_16908_lociStitched (+4236)
ENSG00000255168	3_MACS_peak_1567_lociStitched (+7006)
EPHA1	3_MACS_peak_23100_lociStitched (+22676)
ERCC1	10_MACS_peak_13461_lociStitched (-35833)
ERGIC1	9_MACS_peak_20612_lociStitched (-52214), 8_MACS_peak_20629_lociStitched (+65136)
ETAA1	7_MACS_peak_14435_lociStitched (-957225)
ETNK2	8_MACS_peak_2284_lociStitched (+70274)
ETS1	12_MACS_peak_5425_lociStitched (+96447)
ETS2	9_MACS_peak_16563_lociStitched (+13064), 12_MACS_peak_16579_lociStitched (+109309)
EYA2	4_MACS_peak_16162_lociStitched (+418628)
FAM129B	21_MACS_peak_24989_lociStitched (+26800)
FAM53B	8_MACS_peak_3841_lociStitched (+26539)
FANCC	4_MACS_peak_24631_lociStitched (-185745)
FASN	7_MACS_peak_11787_lociStitched (-125729)
FAT2	14_MACS_peak_20510_lociStitched (-110628)
FBLIM1	3_MACS_peak_326_lociStitched (+77272)
FBLN1	5_MACS_peak_17315_lociStitched (+6949), 7_MACS_peak_17324_lociStitched (+40474)
FCGR1B	2_MACS_peak_1546_lociStitched (-546097)
FDFT1	8_MACS_peak_23272_lociStitched (+53101)
FEM1B	3_MACS_peak_8630_lociStitched (-2147)
FKBP5	4_MACS_peak_21203_lociStitched (+1955)
FLNA	8_MACS_peak_25907_lociStitched (+8468)
FMOD	11_MACS_peak_2256_lociStitched (+34564)
FN1	4_MACS_peak_15345_lociStitched (+35329)
FOS	6_MACS_peak_7841_lociStitched (-12587)
FOSB	10_MACS_peak_13461_lociStitched (-8596)
FOSL2	10_MACS_peak_14098_lociStitched (-10278)
FOXF1	9_MACS_peak_10071_lociStitched (-11839)
FOXO3	2_MACS_peak_21579_lociStitched (-691)
FRMD8	6_MACS_peak_4714_lociStitched (+37070), 14_MACS_peak_4734_lociStitched (+102722)
GATA6	5_MACS_peak_11984_lociStitched (+8008)
GCNT1	1_MACS_peak_24492_lociStitched (+130194)
GJD3	8_MACS_peak_10867_lociStitched (+37307)
GLOD4	11_MACS_peak_10188_lociStitched (-86263)
GLTSCR2	6_MACS_peak_13561_lociStitched (-14326)
GNAI2	6_MACS_peak_17855_lociStitched (+14852)
GORASP1	4_MACS_peak_17668_lociStitched (-39310)
GPR39	3_MACS_peak_14961_lociStitched (-168646), 2_MACS_peak_14964_lociStitched (-135304)
GPRC5C	4_MACS_peak_11488_lociStitched (+9717)
GSN	11_MACS_peak_24866_lociStitched (-17140)
HAAO	3_MACS_peak_14251_lociStitched (-425807), 7_MACS_peak_14242_lociStitched (-383681)
HAUS5	1_MACS_peak_13162_lociStitched (-37042)
HDAC7	6_MACS_peak_5887_lociStitched (-537)
HES7	4_MACS_peak_10409_lociStitched (-24862)
HFE2	4_MACS_peak_1570_lociStitched (-159741)
HFM1	1_MACS_peak_1284_lociStitched (+17461)
HIC1	9_MACS_peak_10256_lociStitched (+16508)
HK1	10_MACS_peak_3146_lociStitched (+67624)
HM13	8_MACS_peak_15919_lociStitched (+85230)
HOOK2	4_MACS_peak_12780_lociStitched (-10625)
HOXA9	MACS_peak_22282 (-1649)
HSPG2	14_MACS_peak_462_lociStitched (+21984)
HTRA4	8_MACS_peak_23584_lociStitched (-48349)
ID1	8_MACS_peak_15919_lociStitched (-5625)
ID2	3_MACS_peak_13876_lociStitched (+2090)
ID3	7_MACS_peak_500_lociStitched (-5710)
IER2	7_MACS_peak_12812_lociStitched (+4870)
IFITM3	8_MACS_peak_3930_lociStitched (-2422)
IFT140	10_MACS_peak_9093_lociStitched (+73909)
IGFBP2	5_MACS_peak_15362_lociStitched (+49012)
IGFBP4	3_MACS_peak_10875_lociStitched (+6741)
IGFBP5	5_MACS_peak_15362_lociStitched (+13118)
IL17B	12_MACS_peak_20406_lociStitched (-35143)
IMP3	5_MACS_peak_8731_lociStitched (-4171)
INPP5A	11_MACS_peak_3884_lociStitched (-127941)
IPO9	9_MACS_peak_2175_lociStitched (-114579)
IRF2BP2	9_MACS_peak_2633_lociStitched (-370966), 4_MACS_peak_2624_lociStitched (-112470), 8_MACS_peak_2616_lociStitched (+2852), 10_MACS_peak_2613_lociStitched (+75429)
IRF2BPL	8_MACS_peak_7889_lociStitched (-5063)
IRF8	9_MACS_peak_10071_lociStitched (+599885)
IRS1	4_MACS_peak_15493_lociStitched (+3802)
JUNB	4_MACS_peak_12780_lociStitched (-5348)
JUND	7_MACS_peak_12976_lociStitched (-10808)
KDM6B	4_MACS_peak_10392_lociStitched (-672)
KHDRBS1	6_MACS_peak_743_lociStitched (-68940)
KIDINS220	3_MACS_peak_13876_lociStitched (+156690)
KIRREL	6_MACS_peak_1891_lociStitched (+14107)
KLF13	11_MACS_peak_8203_lociStitched (+20657)
KLF6	4_MACS_peak_2739_lociStitched (+4638)
KLF9	2_MACS_peak_24446_lociStitched (-1869)
KLHL21	3_MACS_peak_129_lociStitched (-5264)
KMT2E	2_MACS_peak_22883_lociStitched (-608)
KRT17	6_MACS_peak_10905_lociStitched (-32767)
KRT80	5_MACS_peak_5987_lociStitched (+42365)
LAMA5	9_MACS_peak_16340_lociStitched (+1202)
LAPTM4A	20_MACS_peak_13963_lociStitched (-151932)
LDLRAD2	14_MACS_peak_462_lociStitched (+103048)
LHPP	8_MACS_peak_3841_lociStitched (+255676)
LINGO1	15_MACS_peak_8755_lociStitched (-412719)
LMNA	8_MACS_peak_1845_lociStitched (+2537)
LMOD1	9_MACS_peak_2183_lociStitched (+38444)
LRP10	6_MACS_peak_7311_lociStitched (-27598)
LRRC8A	11_MACS_peak_25081_lociStitched (+18785)
LRRFIP1	10_MACS_peak_15622_lociStitched (-3904)
LRSAM1	21_MACS_peak_24989_lociStitched (+90775)
LSG1	10_MACS_peak_18735_lociStitched (-481326)
LSM4	7_MACS_peak_12976_lociStitched (+30844)
LSMEM2	6_MACS_peak_17855_lociStitched (-28222)
LSP1	8_MACS_peak_4009_lociStitched (+10731)
LYL1	11_MACS_peak_12792_lociStitched (+84223)
LZTS2	4_MACS_peak_3599_lociStitched (+3167)
MAFF	7_MACS_peak_17121_lociStitched (+29027)
MAFK	3_MACS_peak_22086_lociStitched (+3824)
MAP1B	1_MACS_peak_19951_lociStitched (-256219)
MAP2K2	6_MACS_peak_12510_lociStitched (+50094)
MAPK11	6_MACS_peak_17394_lociStitched (-24441)
MCL1	5_MACS_peak_1671_lociStitched (+12142)
MEAF6	2_MACS_peak_833_lociStitched (+38806)
MEF2D	5_MACS_peak_1858_lociStitched (+10319)
MEIS1	7_MACS_peak_14435_lociStitched (+4694)
MIDN	9_MACS_peak_12372_lociStitched (+4875)
MKNK2	11_MACS_peak_12407_lociStitched (+2786)
MMP14	6_MACS_peak_7311_lociStitched (+7458)
MNT	5_MACS_peak_10286_lociStitched (+683)
MPEG1	6_MACS_peak_4527_lociStitched (+26352)
MPND	7_MACS_peak_12528_lociStitched (+37003)
MRGPRD	7_MACS_peak_4882_lociStitched (-27183)
MRGPRF	7_MACS_peak_4882_lociStitched (+5239)
MYH9	27_MACS_peak_17053_lociStitched (+32605)
MYOF	17_MACS_peak_3494_lociStitched (+29597)
MZT2A	2_MACS_peak_14964_lociStitched (-788848), 3_MACS_peak_14961_lociStitched (-755506)
NAGLU	5_MACS_peak_10948_lociStitched (-13966)
NAIF1	9_MACS_peak_25022_lociStitched (+100583)
NANOS3	MACS_peak_12831 (-35181)
NAV1	9_MACS_peak_2175_lociStitched (+66313)
NBPF3	14_MACS_peak_447_lociStitched (-110126)
NCOR2	9_MACS_peak_6735_lociStitched (+70357)
NEK6	13_MACS_peak_24905_lociStitched (+15658)
NFIC	15_MACS_peak_12485_lociStitched (+18997)
NFIX	11_MACS_peak_12792_lociStitched (+23036)
NNMT	17_MACS_peak_5184_lociStitched (-86579)
NOTCH2	5_MACS_peak_1533_lociStitched (+44356)
NOTCH2NL	3_MACS_peak_1567_lociStitched (-8448), 4_MACS_peak_1570_lociStitched (+28938)
NR1D1	8_MACS_peak_10845_lociStitched (-2124), 5_MACS_peak_10840_lociStitched (+30300)
NR2F1	5_MACS_peak_20084_lociStitched (+7033)
NR2F2	11_MACS_peak_8978_lociStitched (+7441)
NR4A2	3_MACS_peak_15017_lociStitched (-4896)
NTMT1	4_MACS_peak_25092_lociStitched (-466344), 10_MACS_peak_25121_lociStitched (-118947)
NUP54	11_MACS_peak_19177_lociStitched (-58407)
NXN	11_MACS_peak_10188_lociStitched (+111166)
ORM2	6_MACS_peak_24813_lociStitched (+60785)
OSM	7_MACS_peak_16908_lociStitched (-28406)
OTUD7A	11_MACS_peak_8203_lociStitched (+307827)
PABPC1	1_MACS_peak_23901_lociStitched (-229077)
PCBP1	7_MACS_peak_14493_lociStitched (+2537), 8_MACS_peak_14496_lociStitched (+45665)
PCSK7	7_MACS_peak_5213_lociStitched (+21781)
PDE3A	1_MACS_peak_5729_lociStitched (+182341)
PDZD7	4_MACS_peak_3599_lociStitched (+28490)
PER1	4_MACS_peak_10409_lociStitched (+3489)
PFN1	2_MACS_peak_10327_lociStitched (+891)
PHF13	3_MACS_peak_129_lociStitched (-5552)
PHLDA3	5_MACS_peak_2156_lociStitched (-34142)
PHYHD1	11_MACS_peak_25081_lociStitched (-20121)
PIM3	7_MACS_peak_17380_lociStitched (-9111)
PITRM1	4_MACS_peak_2739_lociStitched (-607826)
PITX1	4_MACS_peak_20264_lociStitched (+496)
PLAC9	6_MACS_peak_3375_lociStitched (+67148)
PLEC	10_MACS_peak_24116_lociStitched (-2545)
PLEKHA2	8_MACS_peak_23584_lociStitched (+24581)
PLEKHG6	14_MACS_peak_5530_lociStitched (-91690), 4_MACS_peak_5548_lociStitched (+21880)
PLXNB2	6_MACS_peak_17394_lociStitched (+12793)
POLA2	11_MACS_peak_4706_lociStitched (+42557)
POLD4	6_MACS_peak_4824_lociStitched (-8389)
POLR3GL	14_MACS_peak_1579_lociStitched (+24209)
POU5F2	5_MACS_peak_20084_lociStitched (+151267)
PPARA	14_MACS_peak_17345_lociStitched (-77893)
PPIF	9_MACS_peak_3319_lociStitched (-255323), 7_MACS_peak_3325_lociStitched (-197197), 14_MACS_peak_3354_lociStitched (+71467)
PPP1R13B	9_MACS_peak_8109_lociStitched (+129853)
PPP1R18	1_MACS_peak_21033_lociStitched (+2193)
PPP2R4	4_MACS_peak_25092_lociStitched (+31222), 10_MACS_peak_25121_lociStitched (+378619)
PQLC2	20_MACS_peak_409_lociStitched (+130177)
PRPS1	12_MACS_peak_25764_lociStitched (+98518)
PRUNE2	1_MACS_peak_24492_lociStitched (+334227)
PSD2	8_MACS_peak_20324_lociStitched (-142523)
PSMB7	13_MACS_peak_24905_lociStitched (+141818)
PSMG1	12_MACS_peak_16579_lociStitched (+269237), 9_MACS_peak_16563_lociStitched (+365482)
PTCH1	4_MACS_peak_24631_lociStitched (+5214)
PTCH2	3_MACS_peak_971_lociStitched (+29466)
PTGR2	12_MACS_peak_7801_lociStitched (-84415)
PTMA	2_MACS_peak_15543_lociStitched (+233)
PTP4A2	6_MACS_peak_743_lociStitched (-6502)
PTPN1	6_MACS_peak_16215_lociStitched (-77170)
PVRL1	12_MACS_peak_5286_lociStitched (+37369)
RAB14	11_MACS_peak_24866_lociStitched (-80784)
RAB8A	10_MACS_peak_12905_lociStitched (-24889)
RAD51B	12_MACS_peak_7731_lociStitched (+836256)
RAI1	14_MACS_peak_10527_lociStitched (+36058), 7_MACS_peak_10539_lociStitched (+148696)
RARA	8_MACS_peak_10867_lociStitched (+17314)
RASA2	8_MACS_peak_18413_lociStitched (-69972)
RBKS	10_MACS_peak_14098_lociStitched (-491482)
RBPMS	21_MACS_peak_23472_lociStitched (+32261), 11_MACS_peak_23497_lociStitched (+165094)
RHBDF2	4_MACS_peak_11579_lociStitched (-24310)
RPL10A	4_MACS_peak_21187_lociStitched (+21656)
RPL11	7_MACS_peak_500_lociStitched (-126274)
RPL26L1	8_MACS_peak_20629_lociStitched (-59482)
RTP2	4_MACS_peak_18669_lociStitched (-41613)
RXRA	8_MACS_peak_25253_lociStitched (+42475), 15_MACS_peak_25262_lociStitched (+89518)
S100A6	5_MACS_peak_1732_lociStitched (+14401)
S100A7	5_MACS_peak_1732_lociStitched (-61142)
SCARB2	11_MACS_peak_19177_lociStitched (+6971)
SCYL1	6_MACS_peak_4714_lociStitched (-101408), 14_MACS_peak_4734_lociStitched (-35756)
SDC1	20_MACS_peak_13963_lociStitched (+21473)
SEMA4A	8_MACS_peak_1845_lociStitched (-36283)
SEPT9	31_MACS_peak_11615_lociStitched (+126100)
SERPINF1	7_MACS_peak_10239_lociStitched (+13053)
SETD1B	2_MACS_peak_6644_lociStitched (-3251)
SGCA	18_MACS_peak_11172_lociStitched (+30434)
SH3GL1	7_MACS_peak_12528_lociStitched (+20017)
SH3PXD2B	12_MACS_peak_20585_lociStitched (+37722)
SHCBP1	7_MACS_peak_9579_lociStitched (+260479)
SHISA4	9_MACS_peak_2183_lociStitched (+19435)
SHISA5	2_MACS_peak_17793_lociStitched (+31039)
SKI	5_MACS_peak_75_lociStitched (-26610)
SLC16A3	7_MACS_peak_11787_lociStitched (-9626)
SLC24A6	10_MACS_peak_6534_lociStitched (+82522)
SLC29A3	6_MACS_peak_3186_lociStitched (-74149)
SLC9A3R2	5_MACS_peak_9127_lociStitched (+6224)
SLCO1C1	1_MACS_peak_5729_lociStitched (-143879)
SMAD3	16_MACS_peak_8614_lociStitched (+56526)
SMAD7	9_MACS_peak_12115_lociStitched (+11632)
SMAP2	9_MACS_peak_887_lociStitched (+18430)
SMIM18	21_MACS_peak_23472_lociStitched (-221829), 11_MACS_peak_23497_lociStitched (-88996)
SMU1	7_MACS_peak_24308_lociStitched (-82427)
SMYD4	7_MACS_peak_10239_lociStitched (+54869)
SNX6	6_MACS_peak_7411_lociStitched (+78626)
SOX13	8_MACS_peak_2284_lociStitched (+8125)
SPAG9	10_MACS_peak_11221_lociStitched (+191127)
SPARC	14_MACS_peak_20510_lociStitched (+7593)
SPEN	3_MACS_peak_326_lociStitched (-6093)
SPIDR	3_MACS_peak_23670_lociStitched (+475681)
SREBF1	7_MACS_peak_10539_lociStitched (+6818), 14_MACS_peak_10527_lociStitched (+119456)
SRR	9_MACS_peak_10256_lociStitched (-230886)
ST3GAL4	10_MACS_peak_5400_lociStitched (-63155)
ST8SIA6	5_MACS_peak_2854_lociStitched (+220950)
STK32C	11_MACS_peak_3884_lociStitched (-101939)
SUFU	6_MACS_peak_3630_lociStitched (+134752)
TACR2	10_MACS_peak_3146_lociStitched (+60499)
TAGLN	7_MACS_peak_5213_lociStitched (+8871)
TARBP1	8_MACS_peak_2616_lociStitched (-127570), 10_MACS_peak_2613_lociStitched (-54993)
TBC1D2B	15_MACS_peak_8755_lociStitched (+32443)
TBX2	5_MACS_peak_11353_lociStitched (+2458)
TBX3	16_MACS_peak_6542_lociStitched (+5664)
TBX4	5_MACS_peak_11353_lociStitched (-54092)
TBX5	16_MACS_peak_6542_lociStitched (-269484)
TCTEX1D4	3_MACS_peak_971_lociStitched (-6312)
TEAD1	16_MACS_peak_4258_lociStitched (+88939)
TEAD3	4_MACS_peak_21187_lociStitched (+7012)
TGFBR3	17_MACS_peak_1299_lociStitched (+159247)
TGIF1	1_MACS_peak_11874_lociStitched (-1361)
THRA	5_MACS_peak_10840_lociStitched (+7615)
THY1	12_MACS_peak_5286_lociStitched (-267587)
TIA1	8_MACS_peak_14496_lociStitched (+115523), 7_MACS_peak_14493_lociStitched (+158651)
TKTL1	8_MACS_peak_25907_lociStitched (+70502)
TMED10	6_MACS_peak_7841_lociStitched (-89556)
TMEM160	5_MACS_peak_13527_lociStitched (-55964)
TMEM184A	3_MACS_peak_22086_lociStitched (+21892)
TMEM184B	7_MACS_peak_17121_lociStitched (+42124)
TMEM204	10_MACS_peak_9093_lociStitched (+4628)
TMEM259	5_MACS_peak_12343_lociStitched (-2794)
TNFRSF1A	4_MACS_peak_5548_lociStitched (+9301)
TNFRSF1B	15_MACS_peak_258_lociStitched (+290439), 6_MACS_peak_270_lociStitched (+438449)
TNNT3	8_MACS_peak_4009_lociStitched (-43666)
TNRC18	3_MACS_peak_22127_lociStitched (-1229)
TNRC6C	31_MACS_peak_11615_lociStitched (-597545)
TNS1	23_MACS_peak_15390_lociStitched (+12007)
TNS4	9_MACS_peak_10880_lociStitched (-44180), 3_MACS_peak_10875_lociStitched (+51395)
TOB1	10_MACS_peak_11221_lociStitched (-63393)
TOMM20	9_MACS_peak_2633_lociStitched (+176014), 4_MACS_peak_2624_lociStitched (+434510)
TPCN1	10_MACS_peak_6534_lociStitched (+31048)
TPM4	10_MACS_peak_12905_lociStitched (+19202)
TREX1	2_MACS_peak_17793_lociStitched (+3596)
TRIM8	6_MACS_peak_3630_lociStitched (-5757)
TRPM5	6_MACS_peak_4023_lociStitched (+34118)
TSC2	5_MACS_peak_9127_lociStitched (-14373)
TSC22D3	12_MACS_peak_25764_lociStitched (+48762)
TSPAN14	7_MACS_peak_3382_lociStitched (+12679)
TULP1	4_MACS_peak_21203_lociStitched (-213690)
TXNIP	14_MACS_peak_1579_lociStitched (+7709)
UBC	7_MACS_peak_6757_lociStitched (-11467)
UBTD2	12_MACS_peak_20585_lociStitched (-132730)
UNC5B	6_MACS_peak_3186_lociStitched (+32539)
UPK2	7_MACS_peak_5259_lociStitched (-35567)
VIL1	6_MACS_peak_15435_lociStitched (-16991)
VIM	5_MACS_peak_2854_lociStitched (+5121)
WASF2	21_MACS_peak_647_lociStitched (-44373)
WNT7B	14_MACS_peak_17345_lociStitched (-95597)
XXYLT1	10_MACS_peak_18735_lociStitched (+117364)
YWHAZ	1_MACS_peak_23901_lociStitched (+1194)
ZBTB16	17_MACS_peak_5184_lociStitched (+111659)
ZBTB38	8_MACS_peak_18413_lociStitched (+29265)
ZBTB7A	6_MACS_peak_12510_lociStitched (-7089)
ZBTB7B	6_MACS_peak_1794_lociStitched (+6363)
ZC3H12A	2_MACS_peak_833_lociStitched (+1405)
ZC3H4	5_MACS_peak_13527_lociStitched (+9157)
ZCCHC24	14_MACS_peak_3354_lociStitched (+26682)
ZDHHC22	8_MACS_peak_7889_lociStitched (+108037)
ZDHHC7	8_MACS_peak_9998_lociStitched (+11902), 14_MACS_peak_9988_lociStitched (+184617)
ZFP36	4_MACS_peak_13278_lociStitched (-2000)
ZFP36L1	9_MACS_peak_7739_lociStitched (-6410), 12_MACS_peak_7731_lociStitched (+137176)
ZFP36L2	3_MACS_peak_14251_lociStitched (+8209), 7_MACS_peak_14242_lociStitched (+50335)
ZFP69B	9_MACS_peak_887_lociStitched (-57980)
ZFYVE21	9_MACS_peak_8109_lociStitched (+2007)
ZMIZ1	9_MACS_peak_3319_lociStitched (+23119), 7_MACS_peak_3325_lociStitched (+81245)
ZMYND8	3_MACS_peak_16165_lociStitched (+13), 4_MACS_peak_16162_lociStitched (+43523)
ZNF33B	4_MACS_peak_3018_lociStitched (+535441), 12_MACS_peak_3009_lociStitched (+732842)
ZNF644	1_MACS_peak_1284_lociStitched (-365935)
ZNF664	9_MACS_peak_6735_lociStitched (+451771)
ZNF750	11_MACS_peak_11827_lociStitched (-23898)
ZSWIM4	MACS_peak_12831 (+46606)
ZYX	3_MACS_peak_23100_lociStitched (+5136)

## Sheet: BLADDER RBPs
36 common elements in "RBPs" and "BLADDER SEs":
ASCC1
CIRBP
CPEB2
CPSF4L
CTIF
DCPS
DHX16
DHX37
EIF1
GLTSCR2
IMP3
IPO9
KHDRBS1
LRRFIP1
LSG1
LSM4
NANOS3
PABPC1
PCBP1
RBPMS
RPL10A
RPL11
RPL26L1
SETD1B
SMAD3
SMAD7
SPEN
TARBP1
TIA1
TNRC6C
ZC3H12A
ZC3H4
ZCCHC24
ZFP36
ZFP36L1
ZFP36L2

## Sheet: STOMACH SMOOTH MUSCLE SE gene
# GREAT version 3.0.0	Species assembly: hg19	Association rule: Basal+extension: 5000 bp upstream, 1000 bp downstream, 1000000 bp max extension, curated regulatory domains included
Gene name	SE
A3GALT2	6_MACS_peak_701_lociStitched (-32744)
A4GALT	3_MACS_peak_18264_lociStitched (+2775)
ABCC1	15_MACS_peak_10416_lociStitched (+138977)
ABCC6	15_MACS_peak_10416_lociStitched (+134910)
ABHD2	7_MACS_peak_9903_lociStitched (+23289)
ABL1	5_MACS_peak_27714_lociStitched (+68679), 5_MACS_peak_27719_lociStitched (+129517)
ABTB1	14_MACS_peak_19573_lociStitched (+67654)
ACACB	2_MACS_peak_7118_lociStitched (+4807)
ACKR6	6_MACS_peak_11408_lociStitched (+3673)
ACSS1	3_MACS_peak_16896_lociStitched (+12358)
ACTB	1_MACS_peak_24209_lociStitched (+1217)
ACTG1	2_MACS_peak_12687_lociStitched (-1235), 3_MACS_peak_12683_lociStitched (+101224)
ACTG2	6_MACS_peak_15384_lociStitched (+3159)
ACTL8	6_MACS_peak_374_lociStitched (-206046)
ACTN1	10_MACS_peak_8640_lociStitched (+50735), 3_MACS_peak_8628_lociStitched (+179170)
ACTN4	12_MACS_peak_13971_lociStitched (+43869)
ADA	7_MACS_peak_17141_lociStitched (+57122)
ADAM11	6_MACS_peak_12045_lociStitched (+41096)
ADAM19	13_MACS_peak_22442_lociStitched (+32190)
ADAMTS9	4_MACS_peak_19097_lociStitched (+346641), 9_MACS_peak_19091_lociStitched (+451445)
ADAMTSL4	MACS_peak_1681 (+12395)
ADCY5	20_MACS_peak_19485_lociStitched (+67729)
ADHFE1	6_MACS_peak_25945_lociStitched (+86010)
ADORA3	7_MACS_peak_1481_lociStitched (-107165)
ADRA1A	2_MACS_peak_25613_lociStitched (+252769)
ADRM1	6_MACS_peak_17379_lociStitched (+56613)
AFAP1	14_MACS_peak_20327_lociStitched (+78931)
AFF1	15_MACS_peak_20720_lociStitched (+111507)
AFG3L2	4_MACS_peak_12878_lociStitched (+56430)
AGBL3	28_MACS_peak_25186_lociStitched (-114070)
AHDC1	10_MACS_peak_589_lociStitched (+42582)
AHNAK	5_MACS_peak_5099_lociStitched (+4389)
AHNAK2	2_MACS_peak_9094_lociStitched (+4808)
AKAP1	2_MACS_peak_12272_lociStitched (+12869)
AKAP13	8_MACS_peak_9877_lociStitched (+233377)
ALPK3	7_MACS_peak_9856_lociStitched (+14473)
AMFR	5_MACS_peak_10747_lociStitched (+160478)
ANGPTL1	2_MACS_peak_2108_lociStitched (-70429)
ANGPTL2	6_MACS_peak_27547_lociStitched (+9491)
ANKFY1	6_MACS_peak_11373_lociStitched (+44394)
ANKS1A	7_MACS_peak_23164_lociStitched (+152448)
ANP32E	1_MACS_peak_1665_lociStitched (+79416)
ANXA13	7_MACS_peak_26287_lociStitched (+66959)
AOC1	6_MACS_peak_25348_lociStitched (+141145)
AP5S1	4_MACS_peak_16724_lociStitched (-11982)
AP5Z1	6_MACS_peak_24192_lociStitched (-27193)
APMAP	3_MACS_peak_16896_lociStitched (-52845)
APOL1	15_MACS_peak_18074_lociStitched (+80275)
ARFGAP2	6_MACS_peak_4981_lociStitched (+10888)
ARHGAP10	8_MACS_peak_21096_lociStitched (+106680)
ARHGAP23	6_MACS_peak_11835_lociStitched (+15396)
ARHGAP27	MACS_peak_12077 (+133997)
ARHGAP44	5_MACS_peak_11537_lociStitched (-104097)
ARHGEF10L	6_MACS_peak_374_lociStitched (+9432)
ARHGEF17	2_MACS_peak_5379_lociStitched (+12830)
ARHGEF25	2_MACS_peak_6732_lociStitched (-1734)
ARHGEF39	MACS_peak_26733 (+4265)
ARL4D	7_MACS_peak_12016_lociStitched (-9342)
ARL8B	4_MACS_peak_18414_lociStitched (-136234)
ARNTL	7_MACS_peak_4705_lociStitched (-458814)
ARRB1	8_MACS_peak_5416_lociStitched (+24672)
ASB1	6_MACS_peak_16587_lociStitched (+280342)
ASB2	11_MACS_peak_8954_lociStitched (+8410)
ASCC1	9_MACS_peak_3567_lociStitched (-31596)
ASXL1	6_MACS_peak_16938_lociStitched (+108785)
ATAD2B	9_MACS_peak_14643_lociStitched (+336812)
ATL2	8_MACS_peak_14905_lociStitched (-76946)
ATN1	5_MACS_peak_6124_lociStitched (+3344)
ATP1A2	7_MACS_peak_1889_lociStitched (-3947)
ATP2B4	11_MACS_peak_2333_lociStitched (-95810), 12_MACS_peak_2344_lociStitched (+42411)
ATP6V0A1	4_MACS_peak_11953_lociStitched (+63354)
ATP6V1F	5_MACS_peak_25116_lociStitched (-18862)
ATP8B4	9_MACS_peak_9361_lociStitched (+674668)
ATXN1	10_MACS_peak_22868_lociStitched (+26371)
AZIN1	3_MACS_peak_26166_lociStitched (+65544), 6_MACS_peak_26160_lociStitched (+115333)
BAG3	5_MACS_peak_4217_lociStitched (+14499)
BARX1	4_MACS_peak_27117_lociStitched (-672)
BCL11A	2_MACS_peak_15203_lociStitched (+8984)
BCL2L14	9_MACS_peak_6186_lociStitched (-362990), 8_MACS_peak_6195_lociStitched (-300246)
BCL6	MACS_peak_20109 (-410343), 1_MACS_peak_20103_lociStitched (+2438)
BCL7A	7_MACS_peak_7299_lociStitched (+52187)
BCL9L	6_MACS_peak_5754_lociStitched (+1081)
BCR	5_MACS_peak_17816_lociStitched (+93285)
BHLHE40	4_MACS_peak_18414_lociStitched (+6870)
BID	6_MACS_peak_17734_lociStitched (-76371)
BMP8A	18_MACS_peak_786_lociStitched (-332336), 9_MACS_peak_800_lociStitched (-106793)
BMPR1A	5_MACS_peak_3813_lociStitched (-79376), 4_MACS_peak_3819_lociStitched (-12217)
BOC	9_MACS_peak_19381_lociStitched (+21327)
BRD2	2_MACS_peak_23115_lociStitched (+4234)
BRSK2	4_MACS_peak_4445_lociStitched (+62353)
BTBD2	6_MACS_peak_13287_lociStitched (-31364)
BTG2	MACS_peak_2314 (-27429)
C11orf44	1_MACS_peak_5930_lociStitched (+226482)
C11orf49	6_MACS_peak_4981_lociStitched (+229416)
C12orf44	7_MACS_peak_6572_lociStitched (-28933)
C12orf5	7_MACS_peak_6062_lociStitched (-33135)
C12orf57	5_MACS_peak_6124_lociStitched (-16216)
C14orf166	6_MACS_peak_8381_lociStitched (+61612)
C19orf77	13_MACS_peak_13330_lociStitched (+106773)
C1orf191	3_MACS_peak_1010_lociStitched (+47845)
C1orf61	7_MACS_peak_1849_lociStitched (-54646)
C1orf86	5_MACS_peak_38_lociStitched (-7487)
C1orf95	19_MACS_peak_2600_lociStitched (+134861)
C22orf23	10_MACS_peak_18117_lociStitched (+44407)
C9orf69	2_MACS_peak_27818_lociStitched (+32062)
CA9	MACS_peak_26735 (+11900)
CABIN1	8_MACS_peak_17847_lociStitched (+147703)
CACNA1C	8_MACS_peak_5990_lociStitched (+24159), 16_MACS_peak_6014_lociStitched (+239862)
CACNA1H	5_MACS_peak_10140_lociStitched (+18990)
CACNA2D4	11_MACS_peak_5985_lociStitched (-51366)
CACNB2	11_MACS_peak_3089_lociStitched (+31385)
CACTIN	5_MACS_peak_13354_lociStitched (-56874)
CALD1	28_MACS_peak_25186_lociStitched (+92788)
CALM1	3_MACS_peak_8837_lociStitched (+3434), 4_MACS_peak_8845_lociStitched (+162397), 12_MACS_peak_8851_lociStitched (+246294)
CALM2	3_MACS_peak_15113_lociStitched (-5217), 13_MACS_peak_15105_lociStitched (+155803)
CALN1	1_MACS_peak_24646_lociStitched (-422921)
CAMK2G	5_MACS_peak_3607_lociStitched (+11640)
CAPN12	12_MACS_peak_13971_lociStitched (+52935)
CAPS	10_MACS_peak_13426_lociStitched (+32686)
CAPZB	18_MACS_peak_407_lociStitched (+49219)
CARKD	4_MACS_peak_8069_lociStitched (+14803)
CARS2	4_MACS_peak_8069_lociStitched (+75693)
CASZ1	14_MACS_peak_211_lociStitched (+113349)
CAV1	6_MACS_peak_25066_lociStitched (+5604)
CBR4	8_MACS_peak_21217_lociStitched (+164215)
CBX6	3_MACS_peak_18162_lociStitched (-2220)
CCDC107	MACS_peak_26733 (+2708)
CCDC85C	11_MACS_peak_8982_lociStitched (+48247)
CCND1	7_MACS_peak_5327_lociStitched (-618998)
CCND2	7_MACS_peak_6062_lociStitched (+14298)
CCNK	11_MACS_peak_8982_lociStitched (+74370)
CCNL1	2_MACS_peak_19889_lociStitched (-7584)
CCR7	3_MACS_peak_11911_lociStitched (+18790)
CD34	3_MACS_peak_2425_lociStitched (-312998), 9_MACS_peak_2419_lociStitched (-245476), MACS_peak_2405 (+82290)
CD44	10_MACS_peak_4861_lociStitched (+27916)
CD46	MACS_peak_2405 (+77055)
CD81	4_MACS_peak_4464_lociStitched (+12341)
CD9	5_MACS_peak_6082_lociStitched (+8484)
CDC25B	4_MACS_peak_16724_lociStitched (+12739)
CDC40	4_MACS_peak_23595_lociStitched (+163168)
CDC42BPG	5_MACS_peak_5178_lociStitched (-24168)
CDC42EP2	4_MACS_peak_5200_lociStitched (-13362)
CDC42EP3	8_MACS_peak_14875_lociStitched (-184762)
CDC42EP4	4_MACS_peak_12455_lociStitched (-36251), 4_MACS_peak_12454_lociStitched (+14662)
CDC7	10_MACS_peak_1330_lociStitched (+240425)
CDH17	4_MACS_peak_26069_lociStitched (-40672)
CDHR3	11_MACS_peak_24988_lociStitched (+32756)
CDK17	5_MACS_peak_6985_lociStitched (+158890)
CDK8	4_MACS_peak_7511_lociStitched (+177800)
CDON	5_MACS_peak_5885_lociStitched (-58806)
CEBPB	5_MACS_peak_17260_lociStitched (+112969), 7_MACS_peak_17271_lociStitched (+210599)
CEBPD	2_MACS_peak_25850_lociStitched (+157), 3_MACS_peak_25844_lociStitched (+220083)
CEP44	7_MACS_peak_21249_lociStitched (-741500), 7_MACS_peak_21263_lociStitched (-149240)
CHD2	8_MACS_peak_9985_lociStitched (+158608)
CHIT1	MACS_peak_2314 (-48436)
CHMP4B	8_MACS_peak_16958_lociStitched (+4572)
CHRDL2	7_MACS_peak_5400_lociStitched (+31998)
CHST15	9_MACS_peak_4311_lociStitched (+7566), 9_MACS_peak_4300_lociStitched (+71824)
CHST3	7_MACS_peak_3556_lociStitched (+23387)
CIDEA	3_MACS_peak_12874_lociStitched (+25955)
CLCF1	3_MACS_peak_5274_lociStitched (+10550)
CLCN4	9_MACS_peak_27892_lociStitched (-57205)
CLCNKA	1_MACS_peak_327_lociStitched (-4279)
CLMP	16_MACS_peak_5844_lociStitched (-9734)
CMIP	25_MACS_peak_11040_lociStitched (+216638)
CNN1	5_MACS_peak_13569_lociStitched (+5254)
COL15A1	7_MACS_peak_27217_lociStitched (+32748)
COL1A1	9_MACS_peak_12186_lociStitched (+2519)
COL4A2	35_MACS_peak_8043_lociStitched (+32566)
COL5A1	5_MACS_peak_27786_lociStitched (-267960), 4_MACS_peak_27796_lociStitched (+10864), 6_MACS_peak_27806_lociStitched (+76998)
COL6A1	9_MACS_peak_17694_lociStitched (-6893), 4_MACS_peak_17703_lociStitched (+76776)
COL6A2	4_MACS_peak_17703_lociStitched (-39584), 7_MACS_peak_17706_lociStitched (+13387)
COL6A3	5_MACS_peak_16538_lociStitched (-11833), 12_MACS_peak_16533_lociStitched (+82316)
COL8A1	5_MACS_peak_19280_lociStitched (+223604)
COMMD7	6_MACS_peak_16938_lociStitched (+276863)
COPS8	12_MACS_peak_16533_lociStitched (+246747)
CORO1C	5_MACS_peak_7107_lociStitched (-57201), 12_MACS_peak_7091_lociStitched (+59061)
COX8C	8_MACS_peak_8941_lociStitched (+424578)
CPED1	8_MACS_peak_25087_lociStitched (+19429)
CPO	1_MACS_peak_16193_lociStitched (+225053)
CPSF4L	4_MACS_peak_12454_lociStitched (-35633)
CPXM2	9_MACS_peak_4311_lociStitched (-193074), 9_MACS_peak_4300_lociStitched (-128816), 6_MACS_peak_4295_lociStitched (+28357)
CRADD	2_MACS_peak_6949_lociStitched (+137170)
CREB3	MACS_peak_26743 (-3078)
CRISPLD2	2_MACS_peak_11080_lociStitched (+8682)
CROCC	2_MACS_peak_355_lociStitched (-149994), 5_MACS_peak_361_lociStitched (-19625)
CRY2	2_MACS_peak_4945_lociStitched (+4768)
CSNK1A1	MACS_peak_22311 (+102425), MACS_peak_22309 (+130569), MACS_peak_22307 (+165151)
CSPG4	MACS_peak_9738 (+6644)
CSRP1	4_MACS_peak_2270_lociStitched (+22262)
CTCFL	9_MACS_peak_17337_lociStitched (+59666), 4_MACS_peak_17329_lociStitched (+125180)
CTDSP1	2_MACS_peak_16339_lociStitched (+1899)
CTDSP2	2_MACS_peak_6748_lociStitched (-47034)
CTIF	6_MACS_peak_13063_lociStitched (+400633)
CTSL	8_MACS_peak_26985_lociStitched (-145085)
CTU2	5_MACS_peak_11192_lociStitched (+58840)
CUX1	11_MACS_peak_24916_lociStitched (+114604)
CXCR5	6_MACS_peak_5754_lociStitched (+26057)
CXXC5	5_MACS_peak_22188_lociStitched (+9544)
CYB5D2	6_MACS_peak_11373_lociStitched (+76198)
CYB5R3	3_MACS_peak_18264_lociStitched (-47702)
CYP17A1	12_MACS_peak_4055_lociStitched (+56085)
CYP26A1	8_MACS_peak_3904_lociStitched (+378030)
CYP46A1	8_MACS_peak_8992_lociStitched (+80050)
CYR61	2_MACS_peak_1263_lociStitched (-3838)
DAAM1	9_MACS_peak_8470_lociStitched (+62892)
DAB2IP	7_MACS_peak_27452_lociStitched (+177915)
DAPK1	8_MACS_peak_26985_lociStitched (+82553)
DBN1	3_MACS_peak_22604_lociStitched (-13153)
DCP1B	11_MACS_peak_5985_lociStitched (+34309)
DCST2	4_MACS_peak_1790_lociStitched (+24944)
DDIT4	9_MACS_peak_3567_lociStitched (-26049)
DDR2	3_MACS_peak_1932_lociStitched (-8140), 10_MACS_peak_1940_lociStitched (+71102)
DEPDC1B	5_MACS_peak_21648_lociStitched (+194950)
DES	MACS_peak_16365 (-11762), MACS_peak_16366 (+3459)
DGUOK	6_MACS_peak_15384_lociStitched (-30659)
DHRS3	3_MACS_peak_277_lociStitched (+9777), 9_MACS_peak_267_lociStitched (+152451)
DHX16	1_MACS_peak_23047_lociStitched (-12369)
DHX37	5_MACS_peak_7409_lociStitched (+66230)
DHX40	7_MACS_peak_12319_lociStitched (-195988)
DIP2C	3_MACS_peak_2871_lociStitched (+192626)
DISP2	3_MACS_peak_9250_lociStitched (-25624)
DIXDC1	4_MACS_peak_5655_lociStitched (+43104)
DLAT	4_MACS_peak_5655_lociStitched (-44507)
DLC1	10_MACS_peak_25503_lociStitched (+386810)
DLG5	7_MACS_peak_3700_lociStitched (+44738)
DMPK	4_MACS_peak_14124_lociStitched (+5983)
DNAJB5	1_MACS_peak_26714_lociStitched (+5608)
DNPEP	MACS_peak_16365 (-18600)
DPF1	2_MACS_peak_13957_lociStitched (-27849)
DPM2	3_MACS_peak_27593_lociStitched (-30882)
DPYSL2	2_MACS_peak_25613_lociStitched (+34794)
DPYSL3	9_MACS_peak_22283_lociStitched (+82546)
DSN1	4_MACS_peak_17036_lociStitched (-72949)
DSTN	11_MACS_peak_16827_lociStitched (+7154)
DUSP1	4_MACS_peak_22541_lociStitched (-9179), 3_MACS_peak_22539_lociStitched (+29981)
DUSP10	6_MACS_peak_2512_lociStitched (+18447)
DYNC1H1	6_MACS_peak_9026_lociStitched (-150277)
E2F8	11_MACS_peak_4771_lociStitched (-454888)
EAPP	2_MACS_peak_8290_lociStitched (-11844)
ECE1	8_MACS_peak_445_lociStitched (-34476)
ECM2	7_MACS_peak_27080_lociStitched (-76412)
EFHD2	10_MACS_peak_289_lociStitched (-229398)
EFNB2	11_MACS_peak_7999_lociStitched (+33515)
EGFL7	5_MACS_peak_27832_lociStitched (-107460)
EGFR	13_MACS_peak_24552_lociStitched (+45547)
EHD1	5_MACS_peak_5178_lociStitched (+9982)
EHD2	9_MACS_peak_14195_lociStitched (-90858)
ELK3	5_MACS_peak_6985_lociStitched (+47288)
ELMSAN1	10_MACS_peak_8702_lociStitched (+6318)
ELOF1	5_MACS_peak_13569_lociStitched (+15265)
EMILIN1	MACS_peak_14707 (-2559)
EML1	8_MACS_peak_8992_lociStitched (-28979)
EML4	4_MACS_peak_14981_lociStitched (-114127)
ENAH	7_MACS_peak_2558_lociStitched (+199406)
ENSG00000171282	3_MACS_peak_12683_lociStitched (+5043)
ENSG00000232850	4_MACS_peak_27601_lociStitched (-41991)
ENSG00000234469	9_MACS_peak_27892_lociStitched (+132427)
ENSG00000250424	9_MACS_peak_24372_lociStitched (-69168)
ENSG00000261130	1_MACS_peak_10355_lociStitched (-250660)
EPCAM	3_MACS_peak_15113_lociStitched (-187330)
ERGIC1	4_MACS_peak_22541_lociStitched (-53901), 9_MACS_peak_22549_lociStitched (+58932)
ERLIN2	4_MACS_peak_25739_lociStitched (-26948)
ERRFI1	3_MACS_peak_118_lociStitched (-177429), 5_MACS_peak_112_lociStitched (-108949), 8_MACS_peak_100_lociStitched (-6806)
ESD	17_MACS_peak_7772_lociStitched (+149566)
ESYT2	4_MACS_peak_25418_lociStitched (+9367)
ETAA1	7_MACS_peak_15265_lociStitched (-946843), 4_MACS_peak_15273_lociStitched (-827666)
ETV6	9_MACS_peak_6186_lociStitched (+58095), 8_MACS_peak_6195_lociStitched (+120839)
EVA1B	2_MACS_peak_745_lociStitched (-57602)
EYA2	7_MACS_peak_17187_lociStitched (+434093)
FAM105B	6_MACS_peak_21436_lociStitched (-464042)
FAM129B	12_MACS_peak_27563_lociStitched (+23845)
FAM20B	2_MACS_peak_2108_lociStitched (-84415)
FAM64A	6_MACS_peak_11408_lociStitched (+108380)
FAS	7_MACS_peak_3847_lociStitched (-28809)
FBXL22	2_MACS_peak_9516_lociStitched (+5285)
FBXO32	6_MACS_peak_26277_lociStitched (+26596)
FCN2	4_MACS_peak_27796_lociStitched (-228174), 6_MACS_peak_27806_lociStitched (-162040)
FEM1B	1_MACS_peak_9623_lociStitched (-1315)
FERMT2	2_MACS_peak_8399_lociStitched (-3408)
FGF7	9_MACS_peak_9361_lociStitched (+21458)
FGFR1	5_MACS_peak_25779_lociStitched (-313318), 5_MACS_peak_25772_lociStitched (-253860), 4_MACS_peak_25763_lociStitched (+12420)
FHL1	2_MACS_peak_28416_lociStitched (-85591), 7_MACS_peak_28425_lociStitched (+33208)
FILIP1L	5_MACS_peak_19280_lociStitched (+252434)
FKBP4	8_MACS_peak_5990_lociStitched (-717231), 16_MACS_peak_6014_lociStitched (-501528)
FKBP5	1_MACS_peak_23191_lociStitched (+2405), 5_MACS_peak_23187_lociStitched (+134679)
FLNA	5_MACS_peak_28473_lociStitched (+8573)
FLNB	5_MACS_peak_19033_lociStitched (-65822)
FLNC	5_MACS_peak_25116_lociStitched (+13665)
FMN1	5_MACS_peak_9178_lociStitched (+195058)
FNBP1	6_MACS_peak_27683_lociStitched (+94084)
FNDC9	2_MACS_peak_22426_lociStitched (-32013)
FOS	4_MACS_peak_8734_lociStitched (-1898)
FOSL2	2_MACS_peak_14740_lociStitched (+5588)
FOXF1	7_MACS_peak_11137_lociStitched (-80951), 3_MACS_peak_11143_lociStitched (-12505)
FOXF2	2_MACS_peak_22684_lociStitched (-423)
FOXK1	6_MACS_peak_24192_lociStitched (+66120)
FOXN4	2_MACS_peak_7118_lociStitched (+187818)
FOXP1	6_MACS_peak_19176_lociStitched (+9718), 8_MACS_peak_19170_lociStitched (+74196)
FRMD8	4_MACS_peak_5207_lociStitched (+49339), 2_MACS_peak_5209_lociStitched (+103112)
FSCN1	6_MACS_peak_24217_lociStitched (+89555)
FSTL1	5_MACS_peak_19436_lociStitched (+17109)
FTCD	7_MACS_peak_17706_lociStitched (+44083)
FXYD2	3_MACS_peak_5732_lociStitched (-49803)
FXYD6	3_MACS_peak_5732_lociStitched (+2635)
FZD4	2_MACS_peak_5528_lociStitched (+146252)
GADD45G	3_MACS_peak_27010_lociStitched (+14336)
GAPDH	4_MACS_peak_6103_lociStitched (+9736)
GAPVD1	8_MACS_peak_27518_lociStitched (+270969)
GCNT1	15_MACS_peak_26893_lociStitched (+417632)
GEM	4_MACS_peak_26069_lociStitched (+13086)
GFOD1	10_MACS_peak_22822_lociStitched (+66481)
GJC1	6_MACS_peak_12045_lociStitched (+30684)
GJD3	9_MACS_peak_11893_lociStitched (+34255)
GLOD4	27_MACS_peak_11258_lociStitched (-124830)
GLTSCR1	9_MACS_peak_14195_lociStitched (+14289)
GMPPA	MACS_peak_16369 (-47002)
GMPR	10_MACS_peak_22868_lociStitched (+496505)
GNAI2	5_MACS_peak_18922_lociStitched (+15651)
GNAO1	5_MACS_peak_10747_lociStitched (+73084)
GNS	10_MACS_peak_6785_lociStitched (+86672)
GPR135	9_MACS_peak_8470_lociStitched (+138995)
GPR156	5_MACS_peak_19436_lociStitched (-149050)
GPR17	6_MACS_peak_15752_lociStitched (+12413)
GPR26	6_MACS_peak_4295_lociStitched (+197102)
GRAMD1B	16_MACS_peak_5844_lociStitched (-320807)
GREM1	5_MACS_peak_9178_lociStitched (+154852)
GRK5	6_MACS_peak_4193_lociStitched (+23644)
GSN	14_MACS_peak_27424_lociStitched (+17746)
GTF2I	4_MACS_peak_24675_lociStitched (-189207)
GTF2IRD1	4_MACS_peak_24675_lociStitched (+14504)
HAAO	2_MACS_peak_15015_lociStitched (-427367), 4_MACS_peak_15001_lociStitched (-130278)
HAND2	7_MACS_peak_21263_lociStitched (-604435), 7_MACS_peak_21249_lociStitched (-12175)
HCRTR1	2_MACS_peak_649_lociStitched (-34884)
HDAC4	25_MACS_peak_16618_lociStitched (+116294)
HDAC7	8_MACS_peak_6491_lociStitched (+22259)
HEATR2	7_MACS_peak_24120_lociStitched (+94328)
HECTD2	8_MACS_peak_3873_lociStitched (+184296)
HERC1	2_MACS_peak_9516_lociStitched (+231250)
HEXIM2	3_MACS_peak_12071_lociStitched (-2554)
HIF3A	2_MACS_peak_14133_lociStitched (+310)
HIST2H3A	2_MACS_peak_1653_lociStitched (+4784)
HIST2H4A	1_MACS_peak_1651_lociStitched (-720)
HIST2H4B	2_MACS_peak_1653_lociStitched (+3749)
HK1	5_MACS_peak_3492_lociStitched (+120652)
HLA-DOA	2_MACS_peak_23115_lociStitched (+34477)
HLF	6_MACS_peak_12235_lociStitched (+19742)
HLX	6_MACS_peak_2512_lociStitched (+845372)
HMCN2	5_MACS_peak_27702_lociStitched (-326731)
HNRNPLL	8_MACS_peak_14905_lociStitched (+148821)
HNRNPUL1	4_MACS_peak_14044_lociStitched (+46804)
HOXA2	MACS_peak_24327 (-11501)
HOXA3	MACS_peak_24327 (+5283)
HOXB2	MACS_peak_12131 (-6594)
HOXB3	MACS_peak_12132 (-21470), MACS_peak_12131 (+1249)
HOXB4	MACS_peak_12132 (+4719)
HS1BP3	9_MACS_peak_14619_lociStitched (+38128), 2_MACS_peak_14607_lociStitched (+200770)
HSD17B7	10_MACS_peak_1940_lociStitched (-87179)
HSP90AB1	2_MACS_peak_23328_lociStitched (-15485)
HSP90B1	5_MACS_peak_7027_lociStitched (-76086)
HSPB7	1_MACS_peak_327_lociStitched (+1017)
HSPB8	6_MACS_peak_7222_lociStitched (+13540)
HSPG2	7_MACS_peak_465_lociStitched (+13704)
HTRA4	5_MACS_peak_25788_lociStitched (-53497)
ID2	2_MACS_peak_14484_lociStitched (-5357)
ID3	3_MACS_peak_485_lociStitched (-6372)
IER2	4_MACS_peak_13635_lociStitched (+1872)
IFFO1	4_MACS_peak_6103_lociStitched (+12410)
IGFBP2	6_MACS_peak_16266_lociStitched (+55690)
IGFBP4	9_MACS_peak_11904_lociStitched (+23053)
IGFBP5	6_MACS_peak_16266_lociStitched (+6440)
IGFBP6	8_MACS_peak_6593_lociStitched (-40873)
IGFBP7	10_MACS_peak_20598_lociStitched (+28757)
IGHMBP2	6_MACS_peak_5317_lociStitched (+36551)
IGLL1	5_MACS_peak_17816_lociStitched (+306813)
IGSF9B	4_MACS_peak_5937_lociStitched (+1011)
IL17B	MACS_peak_22311 (-69263), MACS_peak_22309 (-41119), MACS_peak_22307 (-6537)
IL18BP	3_MACS_peak_5357_lociStitched (+29980)
IL21R	2_MACS_peak_10536_lociStitched (-71458)
IL4R	2_MACS_peak_10536_lociStitched (+16791)
IL6R	6_MACS_peak_1773_lociStitched (+20446)
ILK	MACS_peak_4523 (+5193)
IMP3	MACS_peak_9738 (-57498)
INMT-FAM188B	9_MACS_peak_24372_lociStitched (+32089)
INO80C	9_MACS_peak_12968_lociStitched (+6569)
INO80D	7_MACS_peak_16175_lociStitched (+341096)
INPP5F	5_MACS_peak_4217_lociStitched (-60228)
INPP5J	2_MACS_peak_17959_lociStitched (-28654)
IPPK	7_MACS_peak_27080_lociStitched (+57798)
IQCJ-SCHIP1	6_MACS_peak_19904_lociStitched (+715472)
IRF1	17_MACS_peak_22068_lociStitched (+44766)
IRF2BP2	6_MACS_peak_2752_lociStitched (-368565), 2_MACS_peak_2745_lociStitched (-201030), 2_MACS_peak_2739_lociStitched (-104427), 4_MACS_peak_2734_lociStitched (+11827), 6_MACS_peak_2730_lociStitched (+67164)
IRF2BPL	2_MACS_peak_8777_lociStitched (-5403)
IRF8	7_MACS_peak_11137_lociStitched (+530773), 3_MACS_peak_11143_lociStitched (+599219)
ISL1	1_MACS_peak_21569_lociStitched (-411569), 3_MACS_peak_21570_lociStitched (+7776)
ISL2	1_MACS_peak_9745_lociStitched (+5000)
ITGA5	7_MACS_peak_6642_lociStitched (-960)
ITPKB	8_MACS_peak_2617_lociStitched (-64154), 19_MACS_peak_2600_lociStitched (+55502)
JAG1	7_MACS_peak_16785_lociStitched (+18065)
JPH2	12_MACS_peak_17126_lociStitched (+37323)
JUN	2_MACS_peak_1045_lociStitched (+4692)
JUNB	4_MACS_peak_13609_lociStitched (-4432)
JUND	3_MACS_peak_13770_lociStitched (-11772)
KALRN	6_MACS_peak_19509_lociStitched (+171997)
KANK2	14_MACS_peak_13551_lociStitched (+29559)
KAT7	4_MACS_peak_12159_lociStitched (-59252)
KCNH2	6_MACS_peak_25348_lociStitched (+12543)
KCNMA1	7_MACS_peak_3700_lociStitched (-244146), 7_MACS_peak_3679_lociStitched (+245084), 11_MACS_peak_3665_lociStitched (+431171)
KCTD10	3_MACS_peak_7125_lociStitched (+13734)
KIAA1456	10_MACS_peak_25503_lociStitched (+182399)
KIAA1462	12_MACS_peak_3227_lociStitched (+237529)
KL	6_MACS_peak_7611_lociStitched (+182350)
KLF10	3_MACS_peak_26166_lociStitched (-143291), 6_MACS_peak_26160_lociStitched (-93502)
KLF3	21_MACS_peak_20483_lociStitched (-647393), 5_MACS_peak_20510_lociStitched (+12986)
KLF6	1_MACS_peak_2901_lociStitched (+4380)
KLF7	1_MACS_peak_16193_lociStitched (+1338)
KLF9	6_MACS_peak_26869_lociStitched (-164198), 6_MACS_peak_26860_lociStitched (-56205), 3_MACS_peak_26856_lociStitched (+1650)
KLHL21	4_MACS_peak_83_lociStitched (+1461)
KLHL25	8_MACS_peak_9877_lociStitched (+180924)
KLHL38	7_MACS_peak_26287_lociStitched (-17493)
KLHL8	15_MACS_peak_20720_lociStitched (+174099)
KMT2E	9_MACS_peak_24950_lociStitched (-49763), 1_MACS_peak_24958_lociStitched (-851)
KSR1	6_MACS_peak_11697_lociStitched (-158466)
LACTB	5_MACS_peak_9502_lociStitched (-53986)
LAMA4	16_MACS_peak_23651_lociStitched (+15452)
LAMA5	6_MACS_peak_17379_lociStitched (+7694)
LAMC2	10_MACS_peak_2173_lociStitched (+118955)
LANCL2	13_MACS_peak_24552_lociStitched (-300800)
LAPTM5	6_MACS_peak_636_lociStitched (-134729)
LAX1	12_MACS_peak_2344_lociStitched (-96204)
LBR	7_MACS_peak_2558_lociStitched (-24919)
LCP1	17_MACS_peak_7772_lociStitched (-436318)
LDB3	5_MACS_peak_3813_lociStitched (+8825), 4_MACS_peak_3819_lociStitched (+75984)
LDHD	4_MACS_peak_10970_lociStitched (+17775)
LDLRAD2	7_MACS_peak_465_lociStitched (+111328)
LETM2	4_MACS_peak_25763_lociStitched (+68924)
LGMN	5_MACS_peak_8914_lociStitched (+101490), 6_MACS_peak_8911_lociStitched (+154472)
LHFPL2	10_MACS_peak_21803_lociStitched (+36758), 9_MACS_peak_21787_lociStitched (+123555)
LHFPL3	9_MACS_peak_24950_lociStitched (+635759)
LIMS2	6_MACS_peak_15752_lociStitched (+6268)
LINGO1	2_MACS_peak_9756_lociStitched (-257188)
LMNA	8_MACS_peak_1839_lociStitched (+4312)
LMO3	3_MACS_peak_6265_lociStitched (+8812)
LMOD1	8_MACS_peak_2281_lociStitched (+30473)
LMX1A	12_MACS_peak_1987_lociStitched (+580945), 6_MACS_peak_1968_lociStitched (+767166)
LOXL2	5_MACS_peak_25595_lociStitched (+51062)
LPP	MACS_peak_20109 (-56863), MACS_peak_20120 (+7832), MACS_peak_20123 (+53887)
LRIG1	16_MACS_peak_19126_lociStitched (+59942)
LRP5	6_MACS_peak_5302_lociStitched (+47169)
LRRFIP1	12_MACS_peak_16554_lociStitched (+10942)
LRRTM2	8_MACS_peak_22165_lociStitched (-251466)
LRSAM1	12_MACS_peak_27563_lociStitched (+93730)
LRTOMT	3_MACS_peak_5357_lociStitched (-51293)
LSG1	6_MACS_peak_20194_lociStitched (-555570), 4_MACS_peak_20186_lociStitched (-475391)
LSM4	3_MACS_peak_13770_lociStitched (+29880)
LSMEM2	5_MACS_peak_18922_lociStitched (-27423)
LTBP1	6_MACS_peak_14811_lociStitched (+199780)
LYL1	12_MACS_peak_13630_lociStitched (+54593)
LYST	2_MACS_peak_2777_lociStitched (-196651)
LYVE1	18_MACS_peak_4619_lociStitched (-69123)
LYZL1	19_MACS_peak_3174_lociStitched (+218908), 16_MACS_peak_3206_lociStitched (+327374), 6_MACS_peak_3212_lociStitched (+445630)
MACF1	18_MACS_peak_786_lociStitched (+75948), 9_MACS_peak_800_lociStitched (+301491)
MAMDC2	9_MACS_peak_26850_lociStitched (+43552)
MAP6	4_MACS_peak_5419_lociStitched (+100135)
MAP7D1	12_MACS_peak_735_lociStitched (+14515)
MAP7D3	7_MACS_peak_28425_lociStitched (+70971)
MAPK4	7_MACS_peak_13085_lociStitched (+79868)
MAPK8IP1	2_MACS_peak_4945_lociStitched (-33477)
MAPKAP1	8_MACS_peak_27518_lociStitched (+174433)
MBNL1	5_MACS_peak_19824_lociStitched (-58304), 6_MACS_peak_19830_lociStitched (+46)
MBNL2	12_MACS_peak_7925_lociStitched (+36581)
MCAM	MACS_peak_5778 (-2426)
MCL1	MACS_peak_1681 (+17773)
MCTP2	8_MACS_peak_10001_lociStitched (-205721)
MDM1	8_MACS_peak_6816_lociStitched (-16244)
ME3	9_MACS_peak_5520_lociStitched (-12337)
MED21	3_MACS_peak_6356_lociStitched (+167551)
MEF2A	4_MACS_peak_10060_lociStitched (-422010)
MEF2D	7_MACS_peak_1849_lociStitched (+16790)
MEIS1	7_MACS_peak_15265_lociStitched (+15076), 4_MACS_peak_15273_lociStitched (+134253)
MEIS2	1_MACS_peak_9212_lociStitched (-3492)
MET	6_MACS_peak_25066_lociStitched (-142016)
METTL14	2_MACS_peak_20873_lociStitched (+72038)
METTL24	4_MACS_peak_23595_lociStitched (+14963)
MGLL	14_MACS_peak_19573_lociStitched (+82264)
MGST1	3_MACS_peak_6265_lociStitched (+250560)
MICAL2	12_MACS_peak_4663_lociStitched (+36500), 6_MACS_peak_4671_lociStitched (+113562)
MICAL3	11_MACS_peak_17753_lociStitched (-37634), 6_MACS_peak_17734_lociStitched (+174172)
MICALCL	12_MACS_peak_4663_lociStitched (-139809), 6_MACS_peak_4671_lociStitched (-62747)
MICALL1	10_MACS_peak_18117_lociStitched (+2892)
MKNK2	6_MACS_peak_13287_lociStitched (+4160)
MLPH	5_MACS_peak_16538_lociStitched (-60960)
MLXIP	7_MACS_peak_7299_lociStitched (-7113)
MMD	7_MACS_peak_12249_lociStitched (-291010), 6_MACS_peak_12235_lociStitched (+137238)
MN1	8_MACS_peak_17902_lociStitched (-69909)
MNT	5_MACS_peak_11338_lociStitched (-4907)
MOB2	4_MACS_peak_4445_lociStitched (+13241)
MRGPRD	3_MACS_peak_5323_lociStitched (-28995), 6_MACS_peak_5317_lociStitched (+40594)
MRGPRF	3_MACS_peak_5323_lociStitched (+3427)
MRO	7_MACS_peak_13085_lociStitched (+180118)
MRPL35	5_MACS_peak_15450_lociStitched (+39828)
MRPS23	15_MACS_peak_12293_lociStitched (-44453)
MRVI1	18_MACS_peak_4619_lociStitched (+55938)
MSI2	2_MACS_peak_12272_lociStitched (-158475)
MSN	9_MACS_peak_28169_lociStitched (+3488)
MTSS1L	7_MACS_peak_10914_lociStitched (-29540)
MXI1	2_MACS_peak_4112_lociStitched (+10526)
MYBL1	6_MACS_peak_25945_lociStitched (+94753)
MYH11	32_MACS_peak_10364_lociStitched (+68604)
MYH9	5_MACS_peak_18084_lociStitched (-73939), 15_MACS_peak_18074_lociStitched (+54664)
MYL9	3_MACS_peak_17029_lociStitched (-3030)
MYLK	6_MACS_peak_19498_lociStitched (+217115)
MYO1H	3_MACS_peak_7125_lociStitched (+115907)
MYOCD	5_MACS_peak_11537_lociStitched (+19453)
MYOF	8_MACS_peak_3904_lociStitched (+30274)
MYOZ2	27_MACS_peak_20894_lociStitched (-165166)
MYOZ3	6_MACS_peak_22355_lociStitched (-26897)
MYSM1	2_MACS_peak_1045_lociStitched (-79329)
NACC2	2_MACS_peak_27818_lociStitched (-36221)
NAGLU	4_MACS_peak_11953_lociStitched (-13938)
NAIF1	3_MACS_peak_27593_lociStitched (+97955)
NANOS3	MACS_peak_13649 (-28265)
NAV2	11_MACS_peak_4771_lociStitched (-17088)
NBPF1	5_MACS_peak_361_lociStitched (-288838), 2_MACS_peak_355_lociStitched (-158469)
NBPF3	8_MACS_peak_445_lociStitched (-115173)
NBPF9	4_MACS_peak_1597_lociStitched (-118893), 5_MACS_peak_1602_lociStitched (+155460)
NCAPG2	4_MACS_peak_25418_lociStitched (-115457)
NCOR2	7_MACS_peak_7405_lociStitched (-244875), 13_MACS_peak_7388_lociStitched (-38692), 14_MACS_peak_7367_lociStitched (+95953)
NCS1	5_MACS_peak_27702_lociStitched (+24360)
NDE1	32_MACS_peak_10364_lociStitched (+145140)
NDRG1	5_MACS_peak_26356_lociStitched (+100065)
NDST2	5_MACS_peak_3607_lociStitched (-51361)
NDUFV2	14_MACS_peak_12807_lociStitched (-349866)
NEURL1B	3_MACS_peak_22539_lociStitched (+99948)
NEUROG3	8_MACS_peak_3500_lociStitched (+90565)
NFIC	13_MACS_peak_13330_lociStitched (+7183)
NFIL3	4_MACS_peak_27058_lociStitched (-519892), 17_MACS_peak_27053_lociStitched (-405516)
NFIX	12_MACS_peak_13630_lociStitched (+52666)
NFKB2	MACS_peak_4032 (+7887)
NFKBIA	3_MACS_peak_8301_lociStitched (+9937)
NID1	2_MACS_peak_2777_lociStitched (+1591)
NID2	6_MACS_peak_8381_lociStitched (+17907)
NIPAL4	2_MACS_peak_22426_lociStitched (-82285), 13_MACS_peak_22442_lociStitched (+83566)
NKD1	7_MACS_peak_10711_lociStitched (+47603)
NMNAT2	10_MACS_peak_2173_lociStitched (+113359)
NMUR1	3_MACS_peak_16464_lociStitched (-141308), 5_MACS_peak_16456_lociStitched (-80657)
NNMT	5_MACS_peak_5684_lociStitched (-185920), 9_MACS_peak_5696_lociStitched (-101512)
NOA1	10_MACS_peak_20598_lociStitched (-102805)
NOTCH1	5_MACS_peak_27832_lociStitched (-5534)
NQO2	7_MACS_peak_22702_lociStitched (-27729)
NR1D1	MACS_peak_11883 (+30343)
NR2F2	3_MACS_peak_10020_lociStitched (+4181)
NR3C2	8_MACS_peak_21096_lociStitched (+603778)
NR4A1	7_MACS_peak_6572_lociStitched (+18206)
NR4A2	2_MACS_peak_15851_lociStitched (-4899)
NRP2	7_MACS_peak_16175_lociStitched (+62586)
NSUN6	11_MACS_peak_3089_lociStitched (+479560)
NT5DC3	5_MACS_peak_7027_lociStitched (-13051)
NTHL1	1_MACS_peak_10173_lociStitched (-78266)
NTMT1	3_MACS_peak_27637_lociStitched (-465931), 9_MACS_peak_27658_lociStitched (-189421), 4_MACS_peak_27663_lociStitched (-132227)
NUDT9	11_MACS_peak_20741_lociStitched (+88312)
NUFIP1	3_MACS_peak_7745_lociStitched (+74777)
NXN	27_MACS_peak_11258_lociStitched (+72599)
NXPH3	8_MACS_peak_12151_lociStitched (+47140)
OAZ2	10_MACS_peak_9535_lociStitched (-44536)
OPTC	11_MACS_peak_2333_lociStitched (+36608)
OST4	MACS_peak_14707 (-4235)
PALD1	9_MACS_peak_3530_lociStitched (+28689)
PALLD	8_MACS_peak_21217_lociStitched (+348939)
PARP8	1_MACS_peak_21569_lociStitched (+304580)
PARVA	12_MACS_peak_4679_lociStitched (+52780), 3_MACS_peak_4698_lociStitched (+306536)
PBDC1	2_MACS_peak_28239_lociStitched (-25404)
PBX1	6_MACS_peak_1968_lociStitched (+29914), 12_MACS_peak_1987_lociStitched (+216135)
PCBP1	2_MACS_peak_15341_lociStitched (+2882), 3_MACS_peak_15342_lociStitched (+46205)
PCBP3	9_MACS_peak_17694_lociStitched (+331150)
PCSK7	5_MACS_peak_5723_lociStitched (+24226)
PDE4D	5_MACS_peak_21648_lociStitched (-611413)
PDE4DIP	5_MACS_peak_1602_lociStitched (+27814)
PDE6A	4_MACS_peak_22329_lociStitched (+155221)
PDE6H	10_MACS_peak_6250_lociStitched (+210525)
PDGFC	3_MACS_peak_21180_lociStitched (+14895)
PDK4	3_MACS_peak_24835_lociStitched (-4125)
PDLIM1	26_MACS_peak_3946_lociStitched (-147436)
PDLIM3	12_MACS_peak_21326_lociStitched (-3713)
PDLIM4	3_MACS_peak_22061_lociStitched (+7418)
PDLIM7	3_MACS_peak_22604_lociStitched (+11232)
PDZRN3	6_MACS_peak_19235_lociStitched (+7101), 15_MACS_peak_19227_lociStitched (+88483), 6_MACS_peak_19212_lociStitched (+206267)
PER1	MACS_peak_11465 (-3240)
PEX14	14_MACS_peak_211_lociStitched (+208412)
PEX26	11_MACS_peak_17753_lociStitched (-15730)
PGM2	4_MACS_peak_20472_lociStitched (+52335)
PGM5	13_MACS_peak_26806_lociStitched (+106517)
PHC2	6_MACS_peak_701_lociStitched (+21751)
PHLDA3	4_MACS_peak_2270_lociStitched (-18010)
PHLDB1	5_MACS_peak_5745_lociStitched (+7647)
PIEZO1	5_MACS_peak_11192_lociStitched (+19908)
PIP5K1C	5_MACS_peak_13354_lociStitched (+16790)
PITPNB	8_MACS_peak_17902_lociStitched (+47861)
PITRM1	1_MACS_peak_2901_lociStitched (-608084)
PKD1	1_MACS_peak_10173_lociStitched (+9766)
PKDCC	4_MACS_peak_14981_lociStitched (+7203)
PKIG	7_MACS_peak_17141_lociStitched (+62711)
PLB1	2_MACS_peak_14740_lociStitched (-97625), 13_MACS_peak_14746_lociStitched (+137920)
PLCB2	3_MACS_peak_9250_lociStitched (-24689)
PLCG1	4_MACS_peak_17099_lociStitched (+99834)
PLCG2	25_MACS_peak_11040_lociStitched (-117450)
PLD4	2_MACS_peak_9094_lociStitched (+48726)
PLEC	5_MACS_peak_26458_lociStitched (-2654)
PLEKHA1	8_MACS_peak_4250_lociStitched (-336285), 14_MACS_peak_4263_lociStitched (-229639)
PLEKHA2	5_MACS_peak_25788_lociStitched (+19433)
PLEKHG2	4_MACS_peak_13994_lociStitched (+1712)
PLEKHG6	5_MACS_peak_6082_lociStitched (-102734), 5_MACS_peak_6087_lociStitched (+24928)
PLEKHH2	12_MACS_peak_15029_lociStitched (-302462)
PLEKHO1	1_MACS_peak_1665_lociStitched (+6918)
PLN	9_MACS_peak_23684_lociStitched (-229501)
PLOD2	7_MACS_peak_19766_lociStitched (+12893)
PLXNA2	3_MACS_peak_2425_lociStitched (+19920), 9_MACS_peak_2419_lociStitched (+87442)
PLXNB1	6_MACS_peak_18859_lociStitched (+10427)
PLXNC1	2_MACS_peak_6949_lociStitched (-333836)
PML	5_MACS_peak_9688_lociStitched (+2411)
PNMA1	10_MACS_peak_8702_lociStitched (-39555)
PODN	7_MACS_peak_997_lociStitched (+63308)
POLA2	4_MACS_peak_5200_lociStitched (+42096)
POLD3	7_MACS_peak_5400_lociStitched (+106647)
POLD4	3_MACS_peak_5274_lociStitched (-9641)
POM121	1_MACS_peak_24646_lociStitched (-49657)
PPARA	MACS_peak_18342 (-74442)
PPARGC1B	4_MACS_peak_22329_lociStitched (+59261)
PPIAL4B	4_MACS_peak_1597_lociStitched (-328609)
PPIF	7_MACS_peak_3753_lociStitched (-256312), 6_MACS_peak_3765_lociStitched (-99355), 12_MACS_peak_3779_lociStitched (+68417)
PPP1CB	13_MACS_peak_14746_lociStitched (-117861)
PPP1R12B	3_MACS_peak_2297_lociStitched (+232248)
PPP1R14A	2_MACS_peak_13957_lociStitched (+4492)
PPP1R18	1_MACS_peak_23047_lociStitched (+2489)
PPP1R21	3_MACS_peak_15131_lociStitched (+80076)
PPP1R32	5_MACS_peak_5059_lociStitched (-12831)
PPP1R3C	8_MACS_peak_3873_lociStitched (+38413)
PPP2R1B	3_MACS_peak_5641_lociStitched (+37655)
PPP2R4	3_MACS_peak_27637_lociStitched (+31635), 9_MACS_peak_27658_lociStitched (+308145), 4_MACS_peak_27663_lociStitched (+365339)
PPP2R5C	6_MACS_peak_9026_lociStitched (+52453)
PPP4R2	6_MACS_peak_19212_lociStitched (+421888), 15_MACS_peak_19227_lociStitched (+539672), 6_MACS_peak_19235_lociStitched (+621054)
PPP6R3	6_MACS_peak_5302_lociStitched (-100992)
PQLC2	18_MACS_peak_407_lociStitched (+123938)
PRELP	3_MACS_peak_2326_lociStitched (+24)
PRF1	9_MACS_peak_3530_lociStitched (+95265)
PRICKLE2	4_MACS_peak_19097_lociStitched (-115904), 9_MACS_peak_19091_lociStitched (-11100), 9_MACS_peak_19076_lociStitched (+80350)
PRIM2	2_MACS_peak_23411_lociStitched (-57291)
PRIMA1	11_MACS_peak_8954_lociStitched (-179900), 8_MACS_peak_8941_lociStitched (+16712)
PRPS1	6_MACS_peak_28301_lociStitched (+101143)
PRSS23	9_MACS_peak_5520_lociStitched (-115267), 2_MACS_peak_5528_lociStitched (+8899)
PRSS38	8_MACS_peak_2635_lociStitched (-48261), 2_MACS_peak_2645_lociStitched (+125366)
PRUNE2	15_MACS_peak_26893_lociStitched (+46789)
PSAPL1	14_MACS_peak_20327_lociStitched (-426022)
PSD	MACS_peak_4032 (+16660)
PSD2	5_MACS_peak_22188_lociStitched (-137985)
PSEN2	8_MACS_peak_2617_lociStitched (-67246)
PSMA6	3_MACS_peak_8301_lociStitched (+102452)
PSMD6	9_MACS_peak_19076_lociStitched (-121545)
PTMA	5_MACS_peak_16456_lociStitched (-97363), 3_MACS_peak_16464_lociStitched (-36712), 3_MACS_peak_16466_lociStitched (-129)
PTP4A3	8_MACS_peak_26422_lociStitched (+4612)
PTPLB	6_MACS_peak_19498_lociStitched (-82002)
PTPN1	5_MACS_peak_17260_lociStitched (-206546), 7_MACS_peak_17271_lociStitched (-108916)
PTTG2	21_MACS_peak_20483_lociStitched (+56368)
PTX3	2_MACS_peak_19889_lociStitched (-268992)
PXDN	7_MACS_peak_14448_lociStitched (+17859)
PXN	9_MACS_peak_7236_lociStitched (+20872)
QRFP	5_MACS_peak_27719_lociStitched (+50375), 5_MACS_peak_27714_lociStitched (+111213)
R3HCC1	5_MACS_peak_25595_lociStitched (+65270)
RAB20	35_MACS_peak_8043_lociStitched (+221900)
RAB23	2_MACS_peak_23411_lociStitched (-38053)
RAB31	8_MACS_peak_12836_lociStitched (+123004)
RAB8A	4_MACS_peak_13703_lociStitched (-30772)
RAD51B	18_MACS_peak_8579_lociStitched (+377659), 7_MACS_peak_8607_lociStitched (+714795), 15_MACS_peak_8614_lociStitched (+815896)
RAI1	10_MACS_peak_11597_lociStitched (+36170), 7_MACS_peak_11604_lociStitched (+148689)
RALGPS1	6_MACS_peak_27547_lociStitched (+198618)
RALY	8_MACS_peak_16958_lociStitched (-177846)
RAMP1	9_MACS_peak_16567_lociStitched (+22574)
RANBP3	9_MACS_peak_13436_lociStitched (-100689), 10_MACS_peak_13426_lociStitched (+31218)
RAP1A	7_MACS_peak_1481_lociStitched (-9130)
RAP1B	8_MACS_peak_6816_lociStitched (-262263)
RAP2A	12_MACS_peak_7925_lociStitched (-175286)
RARA	9_MACS_peak_11893_lociStitched (+20366)
RASA2	9_MACS_peak_19731_lociStitched (-70414)
RASA4	3_MACS_peak_24933_lociStitched (-1253)
RASA4B	4_MACS_peak_24928_lociStitched (-1174)
RASGRP1	5_MACS_peak_9231_lociStitched (-917624)
RASGRP3	6_MACS_peak_14811_lociStitched (-329476)
RASSF3	10_MACS_peak_6785_lociStitched (+62262)
RBM38	4_MACS_peak_17329_lociStitched (+8520), 9_MACS_peak_17337_lociStitched (+74034)
RBM44	12_MACS_peak_16554_lociStitched (-95464)
RBPMS	31_MACS_peak_25689_lociStitched (+102102)
RBPMS2	10_MACS_peak_9535_lociStitched (+27770)
REEP1	5_MACS_peak_15450_lociStitched (+98798)
RELT	2_MACS_peak_5379_lociStitched (-55145)
RER1	6_MACS_peak_50_lociStitched (-90797)
RERE	10_MACS_peak_129_lociStitched (+386381), 6_MACS_peak_123_lociStitched (+455347)
RERG	10_MACS_peak_6250_lociStitched (+37870)
REV3L	2_MACS_peak_23617_lociStitched (-114403)
RFX2	9_MACS_peak_13436_lociStitched (+31705)
RGMA	8_MACS_peak_9985_lociStitched (+15426)
RGS10	6_MACS_peak_4193_lociStitched (+311475)
RGS3	7_MACS_peak_27330_lociStitched (+29484), 8_MACS_peak_27342_lociStitched (+112280)
RHOB	2_MACS_peak_14607_lociStitched (+3244), 9_MACS_peak_14619_lociStitched (+165886)
RIN3	6_MACS_peak_8911_lociStitched (+80434), 5_MACS_peak_8914_lociStitched (+133416)
RLBP1	7_MACS_peak_9903_lociStitched (+110312)
RMDN2	8_MACS_peak_14875_lociStitched (-93510)
RNF216	6_MACS_peak_24217_lociStitched (+99361)
ROR2	4_MACS_peak_27058_lociStitched (+6408), 17_MACS_peak_27053_lociStitched (+120784)
RPL10A	4_MACS_peak_23183_lociStitched (+14779)
RPL11	3_MACS_peak_485_lociStitched (-125612)
RPL26L1	9_MACS_peak_22549_lociStitched (-65686)
RPL27A	MACS_peak_4553 (+30875), 10_MACS_peak_4558_lociStitched (+99405)
RPLP0	9_MACS_peak_7236_lociStitched (-43789)
RPRD1B	5_MACS_peak_17061_lociStitched (+58363)
RPS16	4_MACS_peak_13994_lociStitched (+21651)
RPS24	6_MACS_peak_3716_lociStitched (+282086)
RPS27A	10_MACS_peak_15185_lociStitched (-99759)
RPS6KA5	12_MACS_peak_8851_lociStitched (+417331), 4_MACS_peak_8845_lociStitched (+501228), 3_MACS_peak_8837_lociStitched (+660191)
RPUSD4	5_MACS_peak_5885_lociStitched (+89594)
RRBP1	11_MACS_peak_16827_lociStitched (+105266)
RREB1	9_MACS_peak_22765_lociStitched (+30862)
RRN3	1_MACS_peak_10355_lociStitched (-50777)
RTN4	10_MACS_peak_15185_lociStitched (-82099)
RTP2	1_MACS_peak_20103_lociStitched (-40732)
RUSC2	5_MACS_peak_26727_lociStitched (-30874)
RXRA	5_MACS_peak_27786_lociStitched (+47234)
SBDS	1_MACS_peak_24624_lociStitched (+260)
SCAMP1	9_MACS_peak_21787_lociStitched (+164754), 10_MACS_peak_21803_lociStitched (+251551)
SCAPER	1_MACS_peak_9745_lociStitched (+563611)
SCARB1	7_MACS_peak_7405_lociStitched (+123720), 13_MACS_peak_7388_lociStitched (+329903)
SCGB1A1	5_MACS_peak_5099_lociStitched (+123411)
SCHIP1	6_MACS_peak_19904_lociStitched (-55125)
SCYL1	4_MACS_peak_5207_lociStitched (-89139), 2_MACS_peak_5209_lociStitched (-35366)
SDC3	6_MACS_peak_636_lociStitched (+16212)
SDHAF2	5_MACS_peak_5059_lociStitched (+38216)
SDK2	4_MACS_peak_12455_lociStitched (+295663)
SEC22A	20_MACS_peak_19485_lociStitched (+173707)
SEC24D	2_MACS_peak_20873_lociStitched (+78732)
SELPLG	12_MACS_peak_7091_lociStitched (-40457)
SEMA4A	8_MACS_peak_1839_lociStitched (-34508)
SEPT9	15_MACS_peak_12566_lociStitched (+124538)
SERP2	7_MACS_peak_7730_lociStitched (-129971), 3_MACS_peak_7732_lociStitched (-71922)
SERPINB6	7_MACS_peak_22702_lociStitched (-10918)
SERPINH1	4_MACS_peak_5419_lociStitched (+6615)
SERTAD1	4_MACS_peak_14013_lociStitched (-5764)
SERTAD3	4_MACS_peak_14013_lociStitched (+12916)
SETBP1	17_MACS_peak_13008_lociStitched (+62835)
SETD1B	MACS_peak_7291 (-4856)
SGCA	9_MACS_peak_12186_lociStitched (+33108)
SH2B2	11_MACS_peak_24916_lociStitched (-354510)
SH3PXD2B	11_MACS_peak_22523_lociStitched (+26044)
SHISA4	8_MACS_peak_2281_lociStitched (+27406)
SIK2	3_MACS_peak_5641_lociStitched (+126336)
SIL1	8_MACS_peak_22165_lociStitched (+71642)
SIX2	1_MACS_peak_15047_lociStitched (-159309), 1_MACS_peak_15046_lociStitched (+1679)
SIX3	1_MACS_peak_15046_lociStitched (+65988)
SIX5	4_MACS_peak_14124_lociStitched (-5394)
SKI	5_MACS_peak_38_lociStitched (-26434), 6_MACS_peak_50_lociStitched (+72341)
SKIDA1	2_MACS_peak_3112_lociStitched (+762)
SLC14A2	17_MACS_peak_13008_lociStitched (-871068)
SLC16A3	5_MACS_peak_12712_lociStitched (+417)
SLC1A2	10_MACS_peak_4861_lociStitched (+252152)
SLC1A7	7_MACS_peak_997_lociStitched (+17056)
SLC22A4	3_MACS_peak_22061_lociStitched (-29354)
SLC22A5	17_MACS_peak_22068_lociStitched (+76280)
SLC25A25	4_MACS_peak_27601_lociStitched (+18141)
SLC25A26	16_MACS_peak_19126_lociStitched (+372129)
SLC28A1	7_MACS_peak_9856_lociStitched (-53529)
SLC29A1	2_MACS_peak_23328_lociStitched (+8755)
SLC2A9	7_MACS_peak_20358_lociStitched (-81347)
SLC35B1	4_MACS_peak_12159_lociStitched (-21348)
SLC35F1	9_MACS_peak_23684_lociStitched (+411271)
SLC45A1	8_MACS_peak_100_lociStitched (-284712), 5_MACS_peak_112_lociStitched (-182569), 3_MACS_peak_118_lociStitched (-114089), 6_MACS_peak_123_lociStitched (+44291), 10_MACS_peak_129_lociStitched (+113257)
SLC48A1	8_MACS_peak_6491_lociStitched (+24318)
SLC9A6	2_MACS_peak_28416_lociStitched (+76341)
SLMAP	5_MACS_peak_19033_lociStitched (+186348)
SLX4IP	7_MACS_peak_16785_lociStitched (+220678)
SMAD7	6_MACS_peak_13063_lociStitched (+10919)
SMC5	9_MACS_peak_26850_lociStitched (-171888), 3_MACS_peak_26856_lociStitched (+153953)
SMIM18	31_MACS_peak_25689_lociStitched (-151988)
SMIM2	3_MACS_peak_7732_lociStitched (-140663), 7_MACS_peak_7730_lociStitched (-82614)
SMNDC1	2_MACS_peak_4112_lociStitched (+86820)
SMOC2	9_MACS_peak_24054_lociStitched (+108971), 8_MACS_peak_24058_lociStitched (+189365)
SMTN	2_MACS_peak_17959_lociStitched (+13021)
SNAI1	9_MACS_peak_17245_lociStitched (+127785)
SNAP47	8_MACS_peak_2635_lociStitched (+32436)
SNX19	1_MACS_peak_5930_lociStitched (+17071)
SNX20	7_MACS_peak_10711_lociStitched (+85419)
SNX6	2_MACS_peak_8290_lociStitched (+78629)
SOGA1	4_MACS_peak_17036_lociStitched (+16986)
SOGA2	14_MACS_peak_12807_lociStitched (+35393)
SORBS1	26_MACS_peak_3946_lociStitched (+122918)
SPAG9	8_MACS_peak_12220_lociStitched (+195759)
SPARCL1	11_MACS_peak_20741_lociStitched (+18609)
SPATA19	4_MACS_peak_5937_lociStitched (-110473)
SPATA32	MACS_peak_12077 (-29521)
SPC24	14_MACS_peak_13551_lociStitched (-12200)
SPEG	MACS_peak_16366 (-13010), MACS_peak_16369 (+17053)
SPICE1	9_MACS_peak_19381_lociStitched (+282347)
SPIDR	3_MACS_peak_25844_lociStitched (+258398)
SPINK8	6_MACS_peak_18859_lociStitched (-90614)
SPOCK2	7_MACS_peak_3556_lociStitched (+101021)
SPOP	8_MACS_peak_12151_lociStitched (+55165)
SRBD1	1_MACS_peak_15047_lociStitched (+442542)
SRCIN1	6_MACS_peak_11835_lociStitched (+162125)
SREBF1	7_MACS_peak_11604_lociStitched (+6825), 10_MACS_peak_11597_lociStitched (+119344)
SSBP3	3_MACS_peak_1010_lociStitched (+120537)
SSH1	5_MACS_peak_7107_lociStitched (+68793)
SSR1	9_MACS_peak_22765_lociStitched (+174537)
ST5	10_MACS_peak_4558_lociStitched (+129135), MACS_peak_4553 (+197665)
STAMBPL1	7_MACS_peak_3847_lociStitched (+82114)
STARD13	6_MACS_peak_7611_lociStitched (+86971)
STK32A	9_MACS_peak_22283_lociStitched (+192547)
STK38L	3_MACS_peak_6356_lociStitched (-54074)
STK40	2_MACS_peak_745_lociStitched (+4128)
STOM	14_MACS_peak_27424_lociStitched (+52666)
STOML1	5_MACS_peak_9688_lociStitched (-4780)
STON1-GTF2A1L	3_MACS_peak_15131_lociStitched (-48147)
STX10	4_MACS_peak_13635_lociStitched (-3609)
SUCNR1	5_MACS_peak_19824_lociStitched (+336094)
SUFU	10_MACS_peak_4043_lociStitched (+117530)
SUN1	7_MACS_peak_24120_lociStitched (-11472)
SUSD2	8_MACS_peak_17847_lociStitched (-21656)
SVIL	12_MACS_peak_3227_lociStitched (-86194), 6_MACS_peak_3212_lociStitched (+1110), 16_MACS_peak_3206_lociStitched (+119366), 19_MACS_peak_3174_lociStitched (+227832)
SYN3	8_MACS_peak_18002_lociStitched (+236987)
SYNGAP1	4_MACS_peak_23135_lociStitched (+3715)
SYNM	4_MACS_peak_10060_lociStitched (+38609)
SYNPO	6_MACS_peak_22355_lociStitched (+32905)
SYNPO2	27_MACS_peak_20894_lociStitched (+81777)
SYPL1	11_MACS_peak_24988_lociStitched (+116581)
SYT2	3_MACS_peak_2297_lociStitched (+62506)
TACC1	5_MACS_peak_25772_lociStitched (-65499), 5_MACS_peak_25779_lociStitched (-6041)
TACC2	8_MACS_peak_4250_lociStitched (+49218), 14_MACS_peak_4263_lociStitched (+155864)
TACR2	5_MACS_peak_3492_lociStitched (+7471)
TAF10	MACS_peak_4523 (+3659)
TAGLN	5_MACS_peak_5723_lociStitched (+6426)
TARBP1	4_MACS_peak_2734_lociStitched (-118595), 6_MACS_peak_2730_lociStitched (-63258)
TBC1D1	4_MACS_peak_20472_lociStitched (-12118)
TBC1D2B	2_MACS_peak_9756_lociStitched (+187974)
TBC1D7	10_MACS_peak_22822_lociStitched (-94162)
TCP11	7_MACS_peak_23164_lociStitched (+99934)
TDRD10	6_MACS_peak_1773_lociStitched (-77333)
TEAD1	12_MACS_peak_4679_lociStitched (-315076), 3_MACS_peak_4698_lociStitched (-61320), 7_MACS_peak_4705_lociStitched (+73943)
TEAD3	4_MACS_peak_23183_lociStitched (+13889)
TEF	4_MACS_peak_18222_lociStitched (+28253)
TENC1	8_MACS_peak_6593_lociStitched (+7623)
TGFB1	4_MACS_peak_14044_lociStitched (+42776)
TGFBR1	7_MACS_peak_27217_lociStitched (-128702)
TGFBR3	10_MACS_peak_1330_lociStitched (+144697)
TGIF1	1_MACS_peak_12768_lociStitched (-976)
TGM2	5_MACS_peak_17061_lociStitched (+73463)
THBS1	5_MACS_peak_9231_lociStitched (-98663)
THBS2	8_MACS_peak_24058_lociStitched (+622943), 9_MACS_peak_24054_lociStitched (+703337)
THRA	MACS_peak_11883 (+7572)
THRAP3	12_MACS_peak_735_lociStitched (-53699)
TIA1	3_MACS_peak_15342_lociStitched (+114983), 2_MACS_peak_15341_lociStitched (+158306)
TIMP3	8_MACS_peak_18002_lociStitched (+19684)
TINAGL1	2_MACS_peak_649_lociStitched (+6281)
TKTL1	5_MACS_peak_28473_lociStitched (+70397)
TLN2	15_MACS_peak_9491_lociStitched (+309559)
TLR10	5_MACS_peak_20510_lociStitched (+105776)
TM4SF4	5_MACS_peak_19796_lociStitched (+173691)
TMEM100	7_MACS_peak_12249_lociStitched (+19119)
TMEM106A	7_MACS_peak_12016_lociStitched (+103091)
TMEM160	3_MACS_peak_14161_lociStitched (-59928)
TMEM233	6_MACS_peak_7222_lociStitched (-401277)
TMEM252	13_MACS_peak_26806_lociStitched (+77451)
TMEM51	10_MACS_peak_289_lociStitched (+27965)
TNC	9_MACS_peak_27378_lociStitched (+27856), 4_MACS_peak_27367_lociStitched (+87210)
TNFRSF1A	5_MACS_peak_6087_lociStitched (+6253)
TNFRSF1B	9_MACS_peak_267_lociStitched (+298226), 3_MACS_peak_277_lociStitched (+440900)
TNFSF8	9_MACS_peak_27378_lociStitched (-159983), 4_MACS_peak_27367_lociStitched (-100629)
TNP1	6_MACS_peak_16282_lociStitched (-408213)
TNRC18	1_MACS_peak_24209_lociStitched (-105946), 1_MACS_peak_24206_lociStitched (-619)
TNRC6C	15_MACS_peak_12566_lociStitched (-599107)
TNS1	25_MACS_peak_16323_lociStitched (+55059), 6_MACS_peak_16282_lociStitched (+675851)
TNS4	3_MACS_peak_11911_lociStitched (-45085), 9_MACS_peak_11904_lociStitched (+35083)
TOB1	8_MACS_peak_12220_lociStitched (-58761)
TOB2	3_MACS_peak_18223_lociStitched (-633), 4_MACS_peak_18222_lociStitched (+36841)
TOMM20	6_MACS_peak_2752_lociStitched (+178415), 2_MACS_peak_2745_lociStitched (+345950), 2_MACS_peak_2739_lociStitched (+442553)
TOX2	12_MACS_peak_17126_lociStitched (+235403)
TP53I11	2_MACS_peak_4925_lociStitched (+87803), 15_MACS_peak_4921_lociStitched (+168880)
TPBGL	8_MACS_peak_5416_lociStitched (+86127)
TPCN2	7_MACS_peak_5327_lociStitched (+20492)
TPM1	15_MACS_peak_9491_lociStitched (-171761), 5_MACS_peak_9502_lociStitched (+25129)
TPM2	MACS_peak_26735 (+5264)
TPM4	4_MACS_peak_13703_lociStitched (+13319)
TPO	7_MACS_peak_14448_lociStitched (+313186)
TPRG1	MACS_peak_20120 (-951210), MACS_peak_20123 (-905155)
TPSG1	5_MACS_peak_10140_lociStitched (+53026)
TRAF3IP2	2_MACS_peak_23617_lociStitched (+8131)
TRAK1	9_MACS_peak_18730_lociStitched (-43174)
TREH	5_MACS_peak_5745_lociStitched (+65579)
TRIM47	7_MACS_peak_12514_lociStitched (+15203)
TRIM8	10_MACS_peak_4043_lociStitched (-22979)
TRIO	6_MACS_peak_21436_lociStitched (+57004)
TRMT61A	8_MACS_peak_9067_lociStitched (-184)
TRPM3	6_MACS_peak_26869_lociStitched (+542776), 6_MACS_peak_26860_lociStitched (+650769)
TRPM5	4_MACS_peak_4464_lociStitched (+33410)
TSC22D1	3_MACS_peak_7745_lociStitched (-338140)
TSC22D3	6_MACS_peak_28301_lociStitched (+46137)
TSHB	4_MACS_peak_1538_lociStitched (+48402)
TSHZ1	2_MACS_peak_13174_lociStitched (+2652)
TSPAN15	8_MACS_peak_3500_lociStitched (+31200)
TSPAN18	15_MACS_peak_4921_lociStitched (+16855), 2_MACS_peak_4925_lociStitched (+97932)
TSPAN2	4_MACS_peak_1538_lociStitched (+11268)
TTC7A	13_MACS_peak_15105_lociStitched (+79624)
TTLL11	7_MACS_peak_27452_lociStitched (+348571)
TUBA1A	6_MACS_peak_6523_lociStitched (-21934)
TUBA1C	6_MACS_peak_6523_lociStitched (-53649)
TUBB6	3_MACS_peak_12874_lociStitched (-27785), 4_MACS_peak_12878_lociStitched (+12825)
TUBD1	5_MACS_peak_12337_lociStitched (+54216)
TUBE1	16_MACS_peak_23651_lociStitched (-151749)
TULP1	1_MACS_peak_23191_lociStitched (-213240), 5_MACS_peak_23187_lociStitched (-80966)
TWIST2	6_MACS_peak_16587_lociStitched (-140866), 25_MACS_peak_16618_lociStitched (+449676)
TXN2	5_MACS_peak_18084_lociStitched (+20075)
TXNDC2	8_MACS_peak_12836_lociStitched (-54807)
TYW1	1_MACS_peak_24624_lociStitched (-1474)
UAP1	3_MACS_peak_1932_lociStitched (+62792)
UBC	5_MACS_peak_7409_lociStitched (-7543)
UBE2F	9_MACS_peak_16567_lociStitched (-84836)
UBE2V1	9_MACS_peak_17245_lociStitched (+5170)
UBTD2	11_MACS_peak_22523_lociStitched (-144408)
ULK4	9_MACS_peak_18730_lociStitched (-85466)
UMPS	6_MACS_peak_19509_lociStitched (-463688)
UNC13B	5_MACS_peak_26727_lociStitched (+345696)
USP20	6_MACS_peak_27683_lociStitched (+113608)
VAC14	7_MACS_peak_10914_lociStitched (+85555)
VCP	1_MACS_peak_26714_lociStitched (+78000)
VEZF1	15_MACS_peak_12293_lociStitched (+93643)
VIL1	2_MACS_peak_16339_lociStitched (-17438)
VMP1	5_MACS_peak_12337_lociStitched (+131254)
VSIG4	9_MACS_peak_28169_lociStitched (+368924)
WASF2	10_MACS_peak_589_lociStitched (-70892)
WASF3	4_MACS_peak_7511_lociStitched (-125811)
WBP1L	12_MACS_peak_4055_lociStitched (+37478)
WBP2	7_MACS_peak_12514_lociStitched (-6865)
WDR1	7_MACS_peak_20358_lociStitched (+14030)
WDYHV1	6_MACS_peak_26277_lociStitched (+97885)
WEE1	2_MACS_peak_4590_lociStitched (-1943)
WISP1	5_MACS_peak_26356_lociStitched (+6482)
WNT16	8_MACS_peak_25087_lociStitched (-320897)
WNT7B	MACS_peak_18342 (-99048)
WNT9A	2_MACS_peak_2645_lociStitched (+6839)
WSB1	6_MACS_peak_11697_lociStitched (+19464)
WWTR1	5_MACS_peak_19796_lociStitched (+55608)
XRCC6BP1	2_MACS_peak_6748_lociStitched (-47804)
XXYLT1	6_MACS_peak_20194_lociStitched (+43120), 4_MACS_peak_20186_lociStitched (+123299)
YPEL2	7_MACS_peak_12319_lociStitched (+37835)
ZADH2	2_MACS_peak_13174_lociStitched (-4059)
ZBTB16	5_MACS_peak_5684_lociStitched (+12318), 9_MACS_peak_5696_lociStitched (+96726)
ZBTB38	9_MACS_peak_19731_lociStitched (+28823)
ZBTB48	4_MACS_peak_83_lociStitched (+21360)
ZBTB7B	4_MACS_peak_1790_lociStitched (+5997)
ZBTB9	4_MACS_peak_23135_lociStitched (-30700)
ZC3H4	3_MACS_peak_14161_lociStitched (+5193)
ZCCHC24	12_MACS_peak_3779_lociStitched (+29732)
ZDHHC15	2_MACS_peak_28239_lociStitched (-624277)
ZDHHC22	2_MACS_peak_8777_lociStitched (+107697)
ZDHHC7	2_MACS_peak_11080_lociStitched (+182836)
ZFHX3	4_MACS_peak_10944_lociStitched (-6265)
ZFP36L1	10_MACS_peak_8640_lociStitched (-135264), 3_MACS_peak_8628_lociStitched (-6829), 15_MACS_peak_8614_lociStitched (+157536), 7_MACS_peak_8607_lociStitched (+258637), 18_MACS_peak_8579_lociStitched (+595773)
ZFP36L2	12_MACS_peak_15029_lociStitched (-108202), 2_MACS_peak_15015_lociStitched (+6649), 4_MACS_peak_15001_lociStitched (+303738)
ZHX3	4_MACS_peak_17099_lociStitched (+63007)
ZKSCAN3	3_MACS_peak_23009_lociStitched (-4448)
ZMIZ1	6_MACS_peak_3716_lociStitched (-753188), 7_MACS_peak_3753_lociStitched (+22130), 6_MACS_peak_3765_lociStitched (+179087)
ZMYND11	3_MACS_peak_2871_lociStitched (+362556)
ZMYND8	7_MACS_peak_17187_lociStitched (+28058)
ZNF396	9_MACS_peak_12968_lociStitched (-114037)
ZNF618	7_MACS_peak_27330_lociStitched (-402067), 8_MACS_peak_27342_lociStitched (-319271)
ZNF664	14_MACS_peak_7367_lociStitched (+426175)
ZNF703	4_MACS_peak_25739_lociStitched (+13928)
ZNRF1	4_MACS_peak_10970_lociStitched (+99962)
ZSWIM4	MACS_peak_13649 (+53522)

## Sheet: STOMACH SM RBPS
70 common elements in "RBPs" and "STOMACH SEs":
AFF1
AKAP1
ASCC1
ATXN1
CACTIN
CARS2
CDC40
CPSF4L
CTIF
CTU2
DCP1B
DHX16
DHX37
DHX40
DYNC1H1
GAPDH
HEXIM2
HNRNPLL
HNRNPUL1
IGHMBP2
IMP3
LRRFIP1
LSG1
LSM4
MBNL1
MBNL2
METTL14
MRPL35
MRPS23
MSI2
NANOS3
NOA1
NSUN6
NUFIP1
PCBP1
PCBP3
PPARGC1B
PSMA6
R3HCC1
RALY
RBM38
RBM44
RBPMS
RBPMS2
RPL10A
RPL11
RPL26L1
RPL27A
RPLP0
RPS16
RPS24
RPS27A
RPUSD4
RRBP1
SBDS
SETD1B
SMAD7
SMNDC1
SRBD1
TARBP1
TDRD10
THRAP3
TIA1
TNRC6C
TRMT61A
TYW1
ZC3H4
ZCCHC24
ZFP36L1
ZFP36L2

## Sheet: SKELETAL MUSCLE SE genes
# GREAT version 3.0.0	Species assembly: hg19	Association rule: Basal+extension: 5000 bp upstream, 1000 bp downstream, 1000000 bp max extension, curated regulatory domains included
Gene	SE
A3GALT2	6_MACS_peak_1000_lociStitched (-36871)
AAGAB	20_MACS_peak_13472_lociStitched (+119543)
ABCA1	3_MACS_peak_39964_lociStitched (-67460)
ABCB9	14_MACS_peak_10348_lociStitched (-118957)
ABCC8	4_MACS_peak_6828_lociStitched (+76297)
ABCG1	1_MACS_peak_25262_lociStitched (+9394)
ABHD2	15_MACS_peak_13938_lociStitched (+39610)
ABLIM2	9_MACS_peak_29367_lociStitched (+25804)
ABRA	4_MACS_peak_38505_lociStitched (-4997)
ABTB1	18_MACS_peak_28161_lociStitched (+67136)
ACACB	10_MACS_peak_9997_lociStitched (+19415)
ACAD9	9_MACS_peak_28212_lociStitched (-87816)
ACADL	4_MACS_peak_23210_lociStitched (-82795)
ACSL1	3_MACS_peak_30719_lociStitched (+17047)
ACSS1	6_MACS_peak_24179_lociStitched (+18103)
ACTA1	2_MACS_peak_3933_lociStitched (-2412)
ACTB	3_MACS_peak_35457_lociStitched (-11915)
ACTG1	5_MACS_peak_17959_lociStitched (+97695)
ACTN1	5_MACS_peak_12090_lociStitched (+180634)
ACTN2	6_MACS_peak_4119_lociStitched (+1325)
ACTN4	10_MACS_peak_19850_lociStitched (+42036)
ADA	7_MACS_peak_24509_lociStitched (+57214)
ADAMTSL4	MACS_peak_2514 (+15523), MACS_peak_2515 (+27033)
ADAR	5_MACS_peak_2658_lociStitched (-245584)
ADCK3	8_MACS_peak_3868_lociStitched (+66807)
ADCY9	7_MACS_peak_14420_lociStitched (-116187)
ADHFE1	3_MACS_peak_38108_lociStitched (+9030)
ADIPOR1	2_MACS_peak_3397_lociStitched (-2520)
ADPRHL1	1_MACS_peak_11364_lociStitched (+45595)
ADRA1A	11_MACS_peak_37672_lociStitched (+256062)
ADSSL1	6_MACS_peak_12730_lociStitched (+7306)
AFAP1	9_MACS_peak_29367_lociStitched (-192979)
AFF1	18_MACS_peak_29905_lociStitched (+128809)
AGMAT	10_MACS_peak_424_lociStitched (-17635)
AGO2	6_MACS_peak_38903_lociStitched (+62902)
AGTRAP	5_MACS_peak_327_lociStitched (+60067)
AHDC1	14_MACS_peak_826_lociStitched (+57290)
AHNAK	6_MACS_peak_7298_lociStitched (-9921)
AKAP1	2_MACS_peak_17255_lociStitched (+12899)
AKAP13	6_MACS_peak_13865_lociStitched (+221828)
AKIRIN2	7_MACS_peak_34194_lociStitched (+20534)
ALDOA	3_MACS_peak_14894_lociStitched (+10978)
ALOX15	7_MACS_peak_16078_lociStitched (+42819)
ALPK2	8_MACS_peak_18627_lociStitched (+61097)
ALPK3	2_MACS_peak_13845_lociStitched (+14429)
AMOTL1	14_MACS_peak_7905_lociStitched (-14564)
AMPD1	5_MACS_peak_2277_lociStitched (+8593)
ANAPC1	9_MACS_peak_22188_lociStitched (+428036)
ANGPTL2	9_MACS_peak_40400_lociStitched (-12041)
ANK1	1_MACS_peak_37888_lociStitched (+233929)
ANKFY1	13_MACS_peak_16059_lociStitched (-70657)
ANKMY2	7_MACS_peak_35572_lociStitched (+1302)
ANKRD12	7_MACS_peak_18160_lociStitched (-18326)
ANO6	3_MACS_peak_9038_lociStitched (+13874)
ANXA11	3_MACS_peak_5500_lociStitched (+8959)
ANXA2	6_MACS_peak_13273_lociStitched (+14115)
ANXA6	10_MACS_peak_32464_lociStitched (+65412)
AP4E1	6_MACS_peak_13130_lociStitched (-127467)
AP5Z1	12_MACS_peak_35442_lociStitched (-67879)
APBA1	9_MACS_peak_39501_lociStitched (+295475)
APMAP	6_MACS_peak_24179_lociStitched (-47100)
APOBEC2	MACS_peak_33773 (+5171)
APOL1	15_MACS_peak_26039_lociStitched (+100011)
APOL5	15_MACS_peak_25994_lociStitched (+160576)
ARFGAP2	2_MACS_peak_7134_lociStitched (-3154)
ARHGAP1	9_MACS_peak_7122_lociStitched (+10788)
ARHGAP26	7_MACS_peak_32249_lociStitched (+264383)
ARHGEF2	3_MACS_peak_2709_lociStitched (+5930)
ARID2	3_MACS_peak_9038_lociStitched (-499706)
ARID5A	1_MACS_peak_21905_lociStitched (-3399)
ARID5B	11_MACS_peak_5068_lociStitched (+165564)
ARL4D	2_MACS_peak_16948_lociStitched (-8776)
ARL5A	4_MACS_peak_22513_lociStitched (+57962)
ARL8B	2_MACS_peak_26484_lociStitched (-136151)
ARPP21	5_MACS_peak_27024_lociStitched (+19514)
ARRDC2	7_MACS_peak_19509_lociStitched (+24662)
ARRDC3	1_MACS_peak_31582_lociStitched (+2474)
ASAH1	3_MACS_peak_37500_lociStitched (+14487)
ASB15	10_MACS_peak_36846_lociStitched (+73393)
ASB2	5_MACS_peak_12525_lociStitched (+10261)
ASB5	6_MACS_peak_30668_lociStitched (+18534)
ASB8	1_MACS_peak_9110_lociStitched (+31120)
ASCC1	12_MACS_peak_5261_lociStitched (-32502)
ASCC2	14_MACS_peak_25833_lociStitched (+8838)
ATG13	9_MACS_peak_7122_lociStitched (+72211)
ATOH7	12_MACS_peak_5119_lociStitched (+110643)
ATOH8	9_MACS_peak_21784_lociStitched (-23657)
ATP1A2	4_MACS_peak_2783_lociStitched (+1573)
ATP1A4	4_MACS_peak_2783_lociStitched (-34224)
ATP1B1	1_MACS_peak_2981_lociStitched (+7980)
ATP2B2	8_MACS_peak_26568_lociStitched (+54940)
ATP6V1F	4_MACS_peak_36875_lociStitched (-19211)
ATXN1	4_MACS_peak_33211_lociStitched (+431475)
AUH	3_MACS_peak_39723_lociStitched (+154561)
AXIN2	3_MACS_peak_17473_lociStitched (+8162)
AZIN1	7_MACS_peak_38478_lociStitched (+86737)
B3GALT1	4_MACS_peak_22657_lociStitched (-619432)
B3GNT5	4_MACS_peak_28832_lociStitched (+44063)
B4GALT1	6_MACS_peak_39314_lociStitched (+14271)
BAG3	7_MACS_peak_6202_lociStitched (+17694)
BBC3	MACS_peak_20121 (+3416)
BCAN	2_MACS_peak_2734_lociStitched (+27235)
BCAR1	3_MACS_peak_15515_lociStitched (+14870)
BCAR3	9_MACS_peak_1985_lociStitched (+261786)
BCL2L1	4_MACS_peak_24216_lociStitched (+13547)
BCL2L11	9_MACS_peak_22188_lociStitched (+335725)
BCL2L14	13_MACS_peak_8755_lociStitched (-275765)
BCL3	3_MACS_peak_20006_lociStitched (+1623)
BCL6	9_MACS_peak_28952_lociStitched (-193076), 5_MACS_peak_28945_lociStitched (+10306)
BCL7A	6_MACS_peak_10297_lociStitched (+51835)
BCL9L	3_MACS_peak_8229_lociStitched (-9701)
BCLAF1	2_MACS_peak_34752_lociStitched (+1717)
BHLHE40	2_MACS_peak_26484_lociStitched (+6953)
BHLHE41	3_MACS_peak_8907_lociStitched (+10196)
BID	15_MACS_peak_25476_lociStitched (-117259)
BIN1	4_MACS_peak_22341_lociStitched (+30554)
BIN3	8_MACS_peak_37584_lociStitched (+17748)
BMF	5_MACS_peak_12922_lociStitched (+22643)
BMPR1A	12_MACS_peak_5538_lociStitched (-56926)
BRD2	1_MACS_peak_33568_lociStitched (-1129)
BSN	8_MACS_peak_27350_lociStitched (-80766)
BTBD1	11_MACS_peak_13822_lociStitched (-16356)
BTBD2	4_MACS_peak_18888_lociStitched (-33084)
BTG2	7_MACS_peak_3413_lociStitched (-3501)
BZW2	7_MACS_peak_35572_lociStitched (-1619)
C10orf10	5_MACS_peak_4872_lociStitched (-1962)
C10orf128	7_MACS_peak_4911_lociStitched (-108629)
C10orf137	5_MACS_peak_6330_lociStitched (-582721)
C11orf30	10_MACS_peak_7735_lociStitched (+177645)
C12orf44	5_MACS_peak_9220_lociStitched (-24980)
C19orf12	8_MACS_peak_19646_lociStitched (+29332)
C19orf77	12_MACS_peak_18965_lociStitched (+82461)
C1QTNF5	2_MACS_peak_8251_lociStitched (-22723)
C1orf61	6_MACS_peak_2726_lociStitched (-54415)
C1orf95	8_MACS_peak_3857_lociStitched (+131687)
C21orf33	12_MACS_peak_25345_lociStitched (+37302)
C2orf49	6_MACS_peak_22060_lociStitched (+54481)
C3orf20	6_MACS_peak_26700_lociStitched (-137470)
C5orf45	5_MACS_peak_32853_lociStitched (+29657)
C7orf49	3_MACS_peak_37011_lociStitched (+12666)
C9orf3	2_MACS_peak_39817_lociStitched (+107725)
CA9	1_MACS_peak_39405_lociStitched (+13133)
CACNA1E	2_MACS_peak_3152_lociStitched (-339052)
CACNA1S	1_MACS_peak_3321_lociStitched (+11370)
CACNG1	4_MACS_peak_17485_lociStitched (+6436)
CALM1	6_MACS_peak_12427_lociStitched (-1326)
CALM2	9_MACS_peak_21325_lociStitched (+116451)
CALN1	1_MACS_peak_36199_lociStitched (-422681)
CAP2	6_MACS_peak_33245_lociStitched (-99055), 9_MACS_peak_33248_lociStitched (+17490), 6_MACS_peak_33256_lociStitched (+81211)
CAPG	5_MACS_peak_21768_lociStitched (-116541)
CAPN12	10_MACS_peak_19850_lociStitched (+54768)
CAPN3	13_MACS_peak_13004_lociStitched (-440)
CAPN7	3_MACS_peak_26726_lociStitched (+122923)
CAPNS1	4_MACS_peak_19781_lociStitched (+957)
CAPZB	21_MACS_peak_557_lociStitched (+44253)
CARM1	11_MACS_peak_19217_lociStitched (+20016)
CASKIN2	11_MACS_peak_17683_lociStitched (+55878)
CASP10	9_MACS_peak_23083_lociStitched (-48350)
CBLC	3_MACS_peak_20006_lociStitched (-27699)
CBX1	4_MACS_peak_17100_lociStitched (+42223)
CBX3	1_MACS_peak_35673_lociStitched (-400)
CBX7	6_MACS_peak_26159_lociStitched (-89462)
CCDC110	6_MACS_peak_30738_lociStitched (-50094)
CCDC141	6_MACS_peak_22868_lociStitched (+172590)
CCNL1	3_MACS_peak_28606_lociStitched (-5264)
CCR7	6_MACS_peak_16818_lociStitched (+29127)
CD300A	9_MACS_peak_17628_lociStitched (-26187)
CD34	MACS_peak_3541 (+95329)
CD46	MACS_peak_3541 (+64016)
CD59	5_MACS_peak_6956_lociStitched (+23103)
CD93	11_MACS_peak_24139_lociStitched (-35420)
CDC42BPA	8_MACS_peak_3868_lociStitched (+354131)
CDC42BPG	5_MACS_peak_7388_lociStitched (-20881)
CDK1	13_MACS_peak_5035_lociStitched (+104217)
CDK15	7_MACS_peak_23116_lociStitched (+219120)
CDK5RAP1	7_MACS_peak_24258_lociStitched (-29676)
CDKL3	7_MACS_peak_31951_lociStitched (+133660)
CEBPB	11_MACS_peak_24688_lociStitched (+100157), 7_MACS_peak_24704_lociStitched (+219264)
CERK	7_MACS_peak_26402_lociStitched (-14876)
CFLAR	9_MACS_peak_23083_lociStitched (+18427)
CHD2	6_MACS_peak_14045_lociStitched (-83989), MACS_peak_14052 (+5736)
CHMP3	3_MACS_peak_21831_lociStitched (+7830)
CHRAC1	6_MACS_peak_38903_lociStitched (+61419)
CHST3	9_MACS_peak_5238_lociStitched (-101276)
CHURC1	6_MACS_peak_11975_lociStitched (-82421)
CLCNKA	1_MACS_peak_456_lociStitched (-4844)
CLIC5	11_MACS_peak_33895_lociStitched (+97740)
CLIP1	11_MACS_peak_10322_lociStitched (-6555)
CLTCL1	6_MACS_peak_25516_lociStitched (+15266)
CLVS2	6_MACS_peak_34574_lociStitched (+637821)
CMBL	10_MACS_peak_30861_lociStitched (-1833)
CMYA5	2_MACS_peak_31448_lociStitched (+6869)
CNBP	5_MACS_peak_28228_lociStitched (+4565)
CNEP1R1	6_MACS_peak_15052_lociStitched (-189192)
CNGA3	2_MACS_peak_21956_lociStitched (-181050)
COL4A2	18_MACS_peak_11279_lociStitched (+52172)
COL5A1	9_MACS_peak_40720_lociStitched (-290009)
COLQ	4_MACS_peak_26733_lociStitched (+12347)
CORO1C	15_MACS_peak_9972_lociStitched (-83048), 5_MACS_peak_9962_lociStitched (+47897)
CORO6	23_MACS_peak_16596_lociStitched (-71276)
COX4I2	4_MACS_peak_24216_lociStitched (+71463)
COX6A1P2	9_MACS_peak_33717_lociStitched (+27087)
CPEB4	9_MACS_peak_32741_lociStitched (+42302)
CPED1	10_MACS_peak_36815_lociStitched (+19463)
CREB3L1	3_MACS_peak_7103_lociStitched (+74795)
CROCC	3_MACS_peak_480_lociStitched (-287629), 6_MACS_peak_488_lociStitched (-23548)
CRY2	3_MACS_peak_7086_lociStitched (+5409)
CRYBB3	9_MACS_peak_25689_lociStitched (-61639)
CSDE1	6_MACS_peak_2286_lociStitched (+10414)
CSRNP1	2_MACS_peak_27078_lociStitched (-33805), 2_MACS_peak_27077_lociStitched (+5961)
CSRP1	7_MACS_peak_3338_lociStitched (+25272)
CSRP3	6_MACS_peak_6858_lociStitched (-2055)
CTBP2	5_MACS_peak_6330_lociStitched (-108965)
CTCFL	9_MACS_peak_24799_lociStitched (+70493)
CTDSP2	12_MACS_peak_9409_lociStitched (-14511)
CTIF	9_MACS_peak_18522_lociStitched (+402313)
CTRB1	3_MACS_peak_15515_lociStitched (+32137)
CTSB	9_MACS_peak_37405_lociStitched (+13896)
CUX1	12_MACS_peak_36605_lociStitched (+104233)
CXCR6	7_MACS_peak_27218_lociStitched (+32065)
CXXC5	8_MACS_peak_32110_lociStitched (+19184)
CYP17A1	11_MACS_peak_5917_lociStitched (+52000)
CYP26A1	12_MACS_peak_5689_lociStitched (+370493)
CYSTM1	11_MACS_peak_32131_lociStitched (+46596)
DAG1	8_MACS_peak_27350_lociStitched (+3591)
DAPP1	3_MACS_peak_29999_lociStitched (-171767)
DCST2	3_MACS_peak_2672_lociStitched (+24964)
DDC	9_MACS_peak_36032_lociStitched (-92635)
DDI2	10_MACS_peak_424_lociStitched (-14755)
DDIT3	1_MACS_peak_9391_lociStitched (-271)
DDIT4	12_MACS_peak_5261_lociStitched (-25143)
DDX3X	1_MACS_peak_41141_lociStitched (+225)
DENND2C	5_MACS_peak_2277_lociStitched (-16958)
DGCR6	5_MACS_peak_25505_lociStitched (+11676)
DGKD	3_MACS_peak_23571_lociStitched (+72924)
DGKZ	3_MACS_peak_7103_lociStitched (-9138)
DHRS3	12_MACS_peak_379_lociStitched (+29387), 11_MACS_peak_367_lociStitched (+149822)
DHRS7	7_MACS_peak_11853_lociStitched (+2035)
DHRS7B	12_MACS_peak_16486_lociStitched (+84194)
DHX37	5_MACS_peak_10438_lociStitched (+66391)
DHX40	16_MACS_peak_17323_lociStitched (-180810)
DIAPH1	5_MACS_peak_32184_lociStitched (+13039), 3_MACS_peak_32180_lociStitched (+100466)
DIP2A	8_MACS_peak_25421_lociStitched (-87761)
DLEU1	8_MACS_peak_10986_lociStitched (+321805)
DLGAP4	6_MACS_peak_24365_lociStitched (+208700)
DNAJB5	2_MACS_peak_39371_lociStitched (+5701)
DOCK3	5_MACS_peak_27410_lociStitched (-50493)
DPT	4_MACS_peak_2967_lociStitched (+106952)
DPYSL2	11_MACS_peak_37672_lociStitched (+31501)
DRGX	7_MACS_peak_4911_lociStitched (+94874)
DST	8_MACS_peak_34040_lociStitched (-175212), 8_MACS_peak_34026_lociStitched (-43686)
DTNA	9_MACS_peak_18369_lociStitched (+371308)
DUSP1	12_MACS_peak_32683_lociStitched (+10169)
DUSP10	10_MACS_peak_3744_lociStitched (+19742)
DUSP13	2_MACS_peak_5361_lociStitched (-1767)
DUSP27	5_MACS_peak_2930_lociStitched (+8366)
DYRK1A	3_MACS_peak_25179_lociStitched (+139343)
DYRK1B	8_MACS_peak_19883_lociStitched (+9640)
DYRK2	6_MACS_peak_9496_lociStitched (+152083)
EAPP	3_MACS_peak_11579_lociStitched (-8403)
EEF1G	6_MACS_peak_7298_lociStitched (+17217)
EEF2K	8_MACS_peak_14746_lociStitched (-6040)
EFCAB2	4_MACS_peak_4179_lociStitched (-7178)
EGFLAM	3_MACS_peak_31032_lociStitched (+199196)
EGFR	14_MACS_peak_36058_lociStitched (+70245)
EHBP1L1	MACS_peak_7431 (-1857)
EHD1	5_MACS_peak_7388_lociStitched (+13269)
ELL	10_MACS_peak_19546_lociStitched (+32589)
ELMOD1	3_MACS_peak_8007_lociStitched (+118320)
ELMSAN1	10_MACS_peak_12193_lociStitched (+6232)
EMC10	5_MACS_peak_20277_lociStitched (+18024)
EML6	4_MACS_peak_21405_lociStitched (+266695)
ENDOD1	8_MACS_peak_7926_lociStitched (+4510)
ENSG00000091436	11_MACS_peak_22733_lociStitched (-2515)
ENSG00000170091	9_MACS_peak_32741_lociStitched (-115022)
ENSG00000171282	5_MACS_peak_17959_lociStitched (+8572)
ENSG00000232850	6_MACS_peak_40480_lociStitched (-36464)
ENSG00000268083	3_MACS_peak_19856_lociStitched (-8564)
EPHX3	10_MACS_peak_19387_lociStitched (+1697)
ERCC1	8_MACS_peak_20044_lociStitched (-33237)
ERGIC1	14_MACS_peak_32691_lociStitched (+48076)
ERI1	4_MACS_peak_37370_lociStitched (+143922)
ERN1	5_MACS_peak_17434_lociStitched (-31937)
ESCO1	2_MACS_peak_18258_lociStitched (+146453)
ETS1	10_MACS_peak_8391_lociStitched (+99821)
ETS2	7_MACS_peak_25203_lociStitched (+104457)
ETV6	13_MACS_peak_8755_lociStitched (+145320)
EVA1B	5_MACS_peak_1076_lociStitched (-59442), 16_MACS_peak_1069_lociStitched (+62241)
EYA2	5_MACS_peak_24577_lociStitched (+443794)
FABP3	5_MACS_peak_922_lociStitched (-5850)
FAM120B	3_MACS_peak_35310_lociStitched (+231835)
FAM134B	3_MACS_peak_30940_lociStitched (+76252), 4_MACS_peak_30938_lociStitched (+118180)
FAM174B	6_MACS_peak_14045_lociStitched (-159881)
FAM189A2	9_MACS_peak_39501_lociStitched (+47506)
FAM53B	23_MACS_peak_6303_lociStitched (+61527)
FAM73A	2_MACS_peak_1812_lociStitched (+51173)
FAM8A1	9_MACS_peak_33248_lociStitched (-189649), 6_MACS_peak_33256_lociStitched (-125928)
FANCC	2_MACS_peak_39817_lociStitched (+450193)
FASTKD1	4_MACS_peak_22679_lociStitched (+61813)
FAT2	7_MACS_peak_32495_lociStitched (-112469)
FBLIM1	4_MACS_peak_444_lociStitched (+77318)
FBXO31	11_MACS_peak_15731_lociStitched (+23581)
FBXO32	10_MACS_peak_38650_lociStitched (-102773), 8_MACS_peak_38638_lociStitched (+17445)
FDFT1	9_MACS_peak_37405_lociStitched (+51722)
FGGY	9_MACS_peak_1572_lociStitched (+122844), 9_MACS_peak_1591_lociStitched (+409749)
FHL1	4_MACS_peak_41674_lociStitched (+43353)
FHL2	6_MACS_peak_22060_lociStitched (+7384)
FHOD1	2_MACS_peak_15257_lociStitched (-2467)
FILIP1L	17_MACS_peak_27835_lociStitched (-3028)
FLNC	4_MACS_peak_36875_lociStitched (+13316)
FNBP1L	9_MACS_peak_1985_lociStitched (+137232)
FNIP2	10_MACS_peak_30567_lociStitched (+28856)
FOS	9_MACS_peak_12252_lociStitched (-12252)
FOSB	8_MACS_peak_20044_lociStitched (-11192)
FOSL2	14_MACS_peak_20913_lociStitched (-25471)
FOXB1	6_MACS_peak_13273_lociStitched (+379648)
FOXK1	12_MACS_peak_35442_lociStitched (+25434)
FOXL1	11_MACS_peak_15731_lociStitched (+781667)
FOXN4	10_MACS_peak_9997_lociStitched (+173210)
FOXO3	9_MACS_peak_34341_lociStitched (+28655), 1_MACS_peak_34368_lociStitched (+526626)
FRMD8	MACS_peak_7421 (+36412), 3_MACS_peak_7426_lociStitched (+104004)
FRRS1	7_MACS_peak_2069_lociStitched (+97449)
FSCN1	3_MACS_peak_35457_lociStitched (-50199)
FSD1L	4_MACS_peak_39972_lociStitched (+396)
FUBP1	3_MACS_peak_1814_lociStitched (+82961)
FXYD3	2_MACS_peak_19743_lociStitched (+14967)
FYCO1	7_MACS_peak_27218_lociStitched (+18731)
FZD7	7_MACS_peak_23116_lociStitched (-8888)
G6PC3	4_MACS_peak_16968_lociStitched (+39155)
GABARAPL1	2_MACS_peak_8734_lociStitched (+3506)
GABPB2	4_MACS_peak_2534_lociStitched (+66554)
GADD45A	5_MACS_peak_1754_lociStitched (-241212)
GALNT2	15_MACS_peak_3967_lociStitched (+118961)
GAPDH	3_MACS_peak_8642_lociStitched (+10293)
GARNL3	9_MACS_peak_40400_lociStitched (-129602)
GATA5	MACS_peak_24882 (-105899)
GBE1	3_MACS_peak_27748_lociStitched (+10053)
GBF1	7_MACS_peak_5882_lociStitched (+56148)
GBGT1	5_MACS_peak_40671_lociStitched (+35046)
GCGR	4_MACS_peak_17976_lociStitched (+28571)
GCH1	9_MACS_peak_11751_lociStitched (+209078)
GDA	2_MACS_peak_39548_lociStitched (+209708)
GGT6	7_MACS_peak_16078_lociStitched (-38657)
GJD3	9_MACS_peak_16808_lociStitched (+47719)
GLOD4	15_MACS_peak_15880_lociStitched (-91963)
GMPR	4_MACS_peak_33211_lociStitched (+91401)
GNAT3	6_MACS_peak_36373_lociStitched (-110921)
GNLY	9_MACS_peak_21784_lociStitched (+35946)
GORASP1	2_MACS_peak_27077_lociStitched (-39251)
GPR126	13_MACS_peak_34842_lociStitched (+583407)
GPR98	1_MACS_peak_31582_lociStitched (+822085)
GPRC5C	9_MACS_peak_17628_lociStitched (+9316)
GPX3	4_MACS_peak_32458_lociStitched (+3735)
GRAMD2	6_MACS_peak_13594_lociStitched (-21349)
GRB10	9_MACS_peak_36032_lociStitched (+74261)
GREB1L	2_MACS_peak_18258_lociStitched (+90690)
GRTP1	1_MACS_peak_11364_lociStitched (-43803)
GSN	4_MACS_peak_40252_lociStitched (-15977), 11_MACS_peak_40263_lociStitched (+46090)
GTDC1	2_MACS_peak_22455_lociStitched (-216030)
GTF2I	8_MACS_peak_36236_lociStitched (-189895)
GTF2IRD1	8_MACS_peak_36236_lociStitched (+13816)
GYG1	5_MACS_peak_28462_lociStitched (+14466)
GYPC	4_MACS_peak_22341_lociStitched (+420868)
H1FOO	10_MACS_peak_28253_lociStitched (+49413)
H2AFY	10_MACS_peak_31989_lociStitched (+158948)
H3F3B	3_MACS_peak_17701_lociStitched (-259)
H6PD	6_MACS_peak_225_lociStitched (+19189)
HABP2	13_MACS_peak_6089_lociStitched (+88980)
HADH	4_MACS_peak_30077_lociStitched (+12880)
HBEGF	6_MACS_peak_32144_lociStitched (+28271)
HDAC4	18_MACS_peak_23737_lociStitched (+124886)
HDAC5	4_MACS_peak_16968_lociStitched (+13748)
HDAC7	8_MACS_peak_9099_lociStitched (+8183)
HDAC9	5_MACS_peak_35581_lociStitched (+19001)
HDGF	1_MACS_peak_2739_lociStitched (+3020)
HEATR2	12_MACS_peak_35347_lociStitched (+76949)
HECA	14_MACS_peak_34794_lociStitched (+122759)
HECTD2	8_MACS_peak_5652_lociStitched (+197114)
HELZ	4_MACS_peak_17485_lociStitched (+194157)
HEY2	2_MACS_peak_34611_lociStitched (-2014)
HHATL	3_MACS_peak_27138_lociStitched (+8228)
HIC1	6_MACS_peak_15979_lociStitched (+16964), 11_MACS_peak_15989_lociStitched (+152094)
HIF1A	16_MACS_peak_11902_lociStitched (-168606)
HIPK3	11_MACS_peak_6942_lociStitched (+32742)
HIST2H3A	2_MACS_peak_2475_lociStitched (+3995)
HIST2H4B	2_MACS_peak_2475_lociStitched (+4538)
HIVEP2	1_MACS_peak_34852_lociStitched (-615), 13_MACS_peak_34842_lociStitched (+59865)
HK1	11_MACS_peak_5158_lociStitched (+62091)
HLTF	5_MACS_peak_28462_lociStitched (+80723)
HLX	10_MACS_peak_3744_lociStitched (+844077)
HMOX1	5_MACS_peak_25962_lociStitched (-66019)
HNRNPA0	10_MACS_peak_32043_lociStitched (-88972)
HNRNPA2B1	1_MACS_peak_35673_lociStitched (-16)
HNRNPA3	6_MACS_peak_22807_lociStitched (+37393)
HNRNPL	3_MACS_peak_19856_lociStitched (+1591)
HNRNPU	4_MACS_peak_4179_lociStitched (-98220)
HOOK1	9_MACS_peak_1572_lociStitched (-395036), 9_MACS_peak_1591_lociStitched (-108131)
HOOK2	4_MACS_peak_19289_lociStitched (-8799)
HOXC10	MACS_peak_9282 (+7683)
HOXC6	MACS_peak_9284 (-8027)
HOXC8	MACS_peak_9284 (+11283)
HOXC9	MACS_peak_9282 (-7250)
HPGDS	5_MACS_peak_29966_lociStitched (-93010)
HRC	3_MACS_peak_20210_lociStitched (-1927)
HSP90AB1	3_MACS_peak_33874_lociStitched (-15009)
HSPA1A	MACS_peak_33521 (+6765)
HSPA1B	MACS_peak_33521 (-5456)
HSPB1	14_MACS_peak_36315_lociStitched (+25652)
HSPB7	1_MACS_peak_456_lociStitched (+1582)
HSPB8	7_MACS_peak_10194_lociStitched (+13434)
IBA57	10_MACS_peak_3905_lociStitched (+30055)
ICOSLG	12_MACS_peak_25345_lociStitched (+70039)
IER2	4_MACS_peak_19319_lociStitched (+2029)
IFFO1	3_MACS_peak_8642_lociStitched (+11853)
IFITM1	MACS_peak_6434 (-90)
IFNG	6_MACS_peak_9496_lociStitched (+358943)
IGFBP2	7_MACS_peak_23247_lociStitched (+59501)
IGFBP5	3_MACS_peak_23259_lociStitched (-105942), 7_MACS_peak_23247_lociStitched (+2629)
IGFBP6	5_MACS_peak_9239_lociStitched (-41232)
IGFBP7	13_MACS_peak_29717_lociStitched (+29509)
IL10	7_MACS_peak_3520_lociStitched (+81207)
IL12A	8_MACS_peak_28628_lociStitched (-133953)
IL6R	8_MACS_peak_2636_lociStitched (+14763)
INPP5F	7_MACS_peak_6202_lociStitched (-57033)
IP6K3	7_MACS_peak_33601_lociStitched (+14863)
IRF2BP2	9_MACS_peak_4084_lociStitched (-374223), 15_MACS_peak_4066_lociStitched (-285578), 3_MACS_peak_4055_lociStitched (-104327), 8_MACS_peak_4049_lociStitched (+10416), 7_MACS_peak_4037_lociStitched (+88971)
IRF2BPL	5_MACS_peak_12324_lociStitched (-80375), 6_MACS_peak_12317_lociStitched (+1926)
IRS1	12_MACS_peak_23447_lociStitched (+35997)
ISY1	5_MACS_peak_28228_lociStitched (-18297)
ISYNA1	10_MACS_peak_19546_lociStitched (-51237)
ITGA3	5_MACS_peak_17157_lociStitched (+29587)
ITGA7	MACS_peak_9316 (-700)
ITGB6	6_MACS_peak_22594_lociStitched (-25502)
ITPKB	8_MACS_peak_3857_lociStitched (+58676)
JOSD2	5_MACS_peak_20277_lociStitched (+16830)
JPH1	11_MACS_peak_38185_lociStitched (+48761)
JPH2	8_MACS_peak_24494_lociStitched (+19863)
JUN	2_MACS_peak_1525_lociStitched (+4076)
JUNB	4_MACS_peak_19289_lociStitched (-7174)
KCNJ11	4_MACS_peak_6828_lociStitched (-11889)
KCNJ12	5_MACS_peak_16493_lociStitched (-82680)
KCNJ6	3_MACS_peak_25179_lociStitched (+356804)
KCNN3	5_MACS_peak_2658_lociStitched (+16490)
KIAA0020	4_MACS_peak_39089_lociStitched (-667988)
KIAA0195	11_MACS_peak_17683_lociStitched (+3241)
KIAA0247	13_MACS_peak_12124_lociStitched (+42037)
KIAA0922	14_MACS_peak_30529_lociStitched (+54248)
KIAA1549L	11_MACS_peak_6942_lociStitched (-251946), 5_MACS_peak_6956_lociStitched (+171061)
KIAA1586	8_MACS_peak_34026_lociStitched (-359867), 8_MACS_peak_34040_lociStitched (-228341)
KIAA1967	8_MACS_peak_37584_lociStitched (+46740)
KIF21B	1_MACS_peak_3321_lociStitched (-77496)
KLF10	7_MACS_peak_38478_lociStitched (-122098)
KLF13	12_MACS_peak_12836_lociStitched (+37436)
KLF14	10_MACS_peak_36929_lociStitched (-187237)
KLF6	1_MACS_peak_4268_lociStitched (+4044)
KLF9	3_MACS_peak_39522_lociStitched (+7818)
KLHL21	6_MACS_peak_121_lociStitched (+1039)
KLHL24	4_MACS_peak_28844_lociStitched (-4243)
KLHL25	6_MACS_peak_13865_lociStitched (+192473)
KLHL31	7_MACS_peak_33986_lociStitched (-12125)
KLHL38	10_MACS_peak_38650_lociStitched (+8971)
KLHL40	3_MACS_peak_27138_lociStitched (+9080)
KLHL41	4_MACS_peak_22679_lociStitched (+2358)
KLHL8	18_MACS_peak_29905_lociStitched (+156797)
KLRD1	2_MACS_peak_8734_lociStitched (-91507)
KMT2E	7_MACS_peak_36648_lociStitched (-18290)
KPTN	3_MACS_peak_20131_lociStitched (-22107)
KSR1	8_MACS_peak_16525_lociStitched (+95441)
LACTB	3_MACS_peak_13346_lociStitched (-70371)
LAD1	5_MACS_peak_3333_lociStitched (-18695)
LANCL2	14_MACS_peak_36058_lociStitched (-276102), 9_MACS_peak_36083_lociStitched (+174241)
LDB3	12_MACS_peak_5538_lociStitched (+31275)
LDHD	4_MACS_peak_15510_lociStitched (+15725)
LEF1	4_MACS_peak_30077_lociStitched (+165828)
LEUTX	8_MACS_peak_19883_lociStitched (+47399)
LGALS9	8_MACS_peak_16525_lociStitched (-62347)
LGI4	2_MACS_peak_19743_lociStitched (+3971)
LGSN	3_MACS_peak_34060_lociStitched (-244230)
LHFPL3	7_MACS_peak_36648_lociStitched (+667232)
LHPP	23_MACS_peak_6303_lociStitched (+220688)
LIFR	3_MACS_peak_31032_lociStitched (+137799)
LMNA	3_MACS_peak_2715_lociStitched (-1356)
LMOD1	8_MACS_peak_3359_lociStitched (+47319)
LMOD2	10_MACS_peak_36846_lociStitched (-15404)
LMX1A	7_MACS_peak_2877_lociStitched (+737604)
LNPEP	6_MACS_peak_31636_lociStitched (+3246)
LPP	9_MACS_peak_28952_lociStitched (-274130), 9_MACS_peak_28977_lociStitched (+65259), 7_MACS_peak_29019_lociStitched (+747476)
LPXN	1_MACS_peak_7214_lociStitched (+621)
LRRC1	7_MACS_peak_33986_lociStitched (-117147)
LRRC32	10_MACS_peak_7735_lociStitched (+45416)
LRRFIP1	22_MACS_peak_23682_lociStitched (-20032)
LSMEM1	3_MACS_peak_36736_lociStitched (-1983)
LTBP1	6_MACS_peak_21002_lociStitched (+516671)
LY96	11_MACS_peak_38185_lociStitched (+281215)
LYL1	14_MACS_peak_19307_lociStitched (+58007)
LYPLAL1	10_MACS_peak_3689_lociStitched (-793474)
LYZL1	16_MACS_peak_4641_lociStitched (+344127)
LZTS2	1_MACS_peak_5851_lociStitched (+721)
MAF	2_MACS_peak_15575_lociStitched (+2923)
MAFA	10_MACS_peak_38968_lociStitched (-34353)
MAFK	2_MACS_peak_35377_lociStitched (+7477)
MAK16	1_MACS_peak_37789_lociStitched (+75546)
MANBA	2_MACS_peak_30049_lociStitched (-57178)
MAP2K3	5_MACS_peak_16493_lociStitched (+8845)
MAP7D1	8_MACS_peak_1050_lociStitched (+5801)
MAP7D3	4_MACS_peak_41674_lociStitched (+60826)
MAPK8IP1	3_MACS_peak_7086_lociStitched (-32836)
MAPKAPK2	7_MACS_peak_3520_lociStitched (+6250)
MAPKAPK3	5_MACS_peak_27410_lociStitched (+12840)
MAPRE2	9_MACS_peak_18369_lociStitched (-76713)
MAST3	7_MACS_peak_19509_lociStitched (-64964)
MAT2A	5_MACS_peak_21768_lociStitched (-12071)
MATN4	MACS_peak_24527 (-33874)
MB	9_MACS_peak_25985_lociStitched (-532)
MBD6	1_MACS_peak_9391_lociStitched (-1956)
MBNL1	MACS_peak_28541 (+7418)
MBP	12_MACS_peak_18762_lociStitched (+44284)
MCF2L2	4_MACS_peak_28832_lociStitched (+130968)
MCL1	MACS_peak_2515 (+3135), MACS_peak_2514 (+14645)
MDFI	6_MACS_peak_33784_lociStitched (+81793)
MEF2A	6_MACS_peak_14161_lociStitched (-444265), 2_MACS_peak_14162_lociStitched (-391655)
MEF2C	7_MACS_peak_31532_lociStitched (+9526)
MEF2D	6_MACS_peak_2726_lociStitched (+17021)
METTL6	4_MACS_peak_26733_lociStitched (-81886)
MGAT1	5_MACS_peak_32872_lociStitched (-6905)
MGLL	18_MACS_peak_28161_lociStitched (+82782)
MICAL3	15_MACS_peak_25476_lociStitched (+133284)
MIDN	MACS_peak_18853 (+205)
MKLN1	10_MACS_peak_36929_lociStitched (-406494)
MKNK2	4_MACS_peak_18888_lociStitched (+2440)
MLF1IP	3_MACS_peak_30719_lociStitched (-75638)
MLXIP	6_MACS_peak_10297_lociStitched (-7465)
MN1	11_MACS_peak_25756_lociStitched (+119412)
MNF1	7_MACS_peak_33601_lociStitched (-20395)
MNT	4_MACS_peak_16004_lociStitched (-162)
MPZL1	7_MACS_peak_2943_lociStitched (-64252)
MR1	2_MACS_peak_3152_lociStitched (+110690)
MRPL23	MACS_peak_6499 (-22799)
MRPL24	1_MACS_peak_2739_lociStitched (-8340)
MRPS18B	1_MACS_peak_33467_lociStitched (-2460)
MRPS23	19_MACS_peak_17289_lociStitched (-44274)
MSI2	2_MACS_peak_17255_lociStitched (-158445)
MSL1	MACS_peak_16797 (-13623)
MST1	2_MACS_peak_27363_lociStitched (-4770)
MT2A	2_MACS_peak_15134_lociStitched (-176)
MTFR2	2_MACS_peak_34752_lociStitched (-37823)
MTHFR	5_MACS_peak_327_lociStitched (+7023)
MTMR7	7_MACS_peak_37461_lociStitched (-109387)
MTR	6_MACS_peak_4119_lociStitched (-107477)
MTSS1L	10_MACS_peak_15418_lociStitched (-30969)
MTTP	3_MACS_peak_29999_lociStitched (+80996)
MTUS1	18_MACS_peak_37482_lociStitched (+149024)
MTX3	2_MACS_peak_31448_lociStitched (+294499)
MUC4	9_MACS_peak_29129_lociStitched (-76862)
MUSTN1	2_MACS_peak_27468_lociStitched (-5099)
MYBL1	3_MACS_peak_38108_lociStitched (+171733)
MYBPC1	10_MACS_peak_9821_lociStitched (-4694)
MYBPHL	4_MACS_peak_2144_lociStitched (-79435)
MYF6	3_MACS_peak_9601_lociStitched (-12646)
MYH2	7_MACS_peak_16268_lociStitched (-52818)
MYH3	7_MACS_peak_16268_lociStitched (+54534)
MYH9	9_MACS_peak_26051_lociStitched (-67812), 15_MACS_peak_26039_lociStitched (+34928)
MYL1	4_MACS_peak_23210_lociStitched (+6904)
MYL12A	1_MACS_peak_18106_lociStitched (+6895)
MYL12B	1_MACS_peak_18106_lociStitched (-7992)
MYL9	6_MACS_peak_24365_lociStitched (-66929)
MYLPF	2_MACS_peak_14910_lociStitched (-40)
MYO18A	10_MACS_peak_16571_lociStitched (+50894)
MYO18B	5_MACS_peak_25706_lociStitched (+11494)
MYOD1	5_MACS_peak_6830_lociStitched (-16846)
MYOF	12_MACS_peak_5689_lociStitched (+37811)
MYOM3	9_MACS_peak_691_lociStitched (+15564)
MYOT	10_MACS_peak_32043_lociStitched (-24469)
MYOZ1	5_MACS_peak_5310_lociStitched (+487)
MYOZ2	10_MACS_peak_30166_lociStitched (-133077)
MYOZ3	14_MACS_peak_32443_lociStitched (-30733)
MYPN	12_MACS_peak_5119_lociStitched (+12234)
MYSM1	2_MACS_peak_1525_lociStitched (-79945)
NANOS3	MACS_peak_19332 (-36866)
NAPA	3_MACS_peak_20131_lociStitched (+8865)
NBPF1	6_MACS_peak_488_lociStitched (-284915), 3_MACS_peak_480_lociStitched (-20834)
NBPF9	1_MACS_peak_2394_lociStitched (-274877), 3_MACS_peak_2398_lociStitched (-119357), 11_MACS_peak_2405_lociStitched (+168397)
NCOR2	10_MACS_peak_10396_lociStitched (+98392)
NDUFV2	7_MACS_peak_18160_lociStitched (+15821)
NEB	4_MACS_peak_22513_lociStitched (-36039), 4_MACS_peak_22507_lociStitched (+11801)
NEDD4L	8_MACS_peak_18627_lociStitched (+523482)
NES	2_MACS_peak_2734_lociStitched (+8214)
NEURL	6_MACS_peak_5965_lociStitched (+267291)
NEURL1B	12_MACS_peak_32683_lociStitched (+119760)
NEUROG3	10_MACS_peak_5173_lociStitched (+100040)
NEXN	2_MACS_peak_1812_lociStitched (-57831), 3_MACS_peak_1814_lociStitched (+7496)
NFE2L1	4_MACS_peak_17100_lociStitched (+10616)
NFE2L2	6_MACS_peak_22807_lociStitched (+15175)
NFIA	7_MACS_peak_1615_lociStitched (+27679)
NFIB	5_MACS_peak_39200_lociStitched (-13)
NFIC	12_MACS_peak_18965_lociStitched (+31495)
NFIX	14_MACS_peak_19307_lociStitched (+49252)
NFKB2	7_MACS_peak_5882_lociStitched (-92917)
NKX6-3	1_MACS_peak_37888_lociStitched (-15473)
NME1	3_MACS_peak_17215_lociStitched (-27570)
NME7	1_MACS_peak_2981_lociStitched (+254290)
NMUR1	8_MACS_peak_23535_lociStitched (-159027), 8_MACS_peak_23526_lociStitched (-91481)
NNMT	22_MACS_peak_8110_lociStitched (-98497), 6_MACS_peak_8131_lociStitched (+43455)
NOA1	13_MACS_peak_29717_lociStitched (-102053)
NOTCH3	10_MACS_peak_19387_lociStitched (-29754)
NR1D1	MACS_peak_16797 (-8266), MACS_peak_16796 (+4813)
NR2F2	4_MACS_peak_14117_lociStitched (+8515)
NR3C1	2_MACS_peak_32274_lociStitched (-1599), 7_MACS_peak_32249_lociStitched (+368922)
NR4A1	5_MACS_peak_9220_lociStitched (+22159)
NR4A3	3_MACS_peak_39925_lociStitched (-465380)
NRAP	13_MACS_peak_6089_lociStitched (+22121)
NRAS	6_MACS_peak_2286_lociStitched (-22882)
NTMT1	2_MACS_peak_40559_lociStitched (-118127)
NUFIP1	4_MACS_peak_10874_lociStitched (+71163)
NUP214	11_MACS_peak_40616_lociStitched (+157055)
NUP54	3_MACS_peak_29789_lociStitched (-58460)
NXN	15_MACS_peak_15880_lociStitched (+105466)
NXT1	11_MACS_peak_24139_lociStitched (-228976)
OARD1	MACS_peak_33773 (+14116)
OBSCN	10_MACS_peak_3905_lociStitched (-12260)
ORC3	7_MACS_peak_34194_lociStitched (+91540)
OTOG	5_MACS_peak_6830_lociStitched (+155349)
OTUD7A	12_MACS_peak_12836_lociStitched (+291048)
P2RY2	3_MACS_peak_7641_lociStitched (+8925)
P2RY6	3_MACS_peak_7641_lociStitched (-44978)
PADI2	6_MACS_peak_501_lociStitched (+17474)
PALMD	7_MACS_peak_2069_lociStitched (+22401)
PARK2	3_MACS_peak_35195_lociStitched (-617557)
PARVA	6_MACS_peak_6759_lociStitched (+306990)
PARVB	6_MACS_peak_26322_lociStitched (+46089)
PARVG	6_MACS_peak_26322_lociStitched (-127656)
PBDC1	2_MACS_peak_41399_lociStitched (-25382)
PBX1	7_MACS_peak_2877_lociStitched (+59476)
PCBP1	MACS_peak_21623 (-256)
PCDHGC5	3_MACS_peak_32180_lociStitched (+29348), 5_MACS_peak_32184_lociStitched (+116775)
PCM1	3_MACS_peak_37500_lociStitched (+147641)
PCNT	8_MACS_peak_25421_lociStitched (+47227)
PCNXL4	7_MACS_peak_11853_lociStitched (+75910)
PDCD4	14_MACS_peak_6014_lociStitched (-189571)
PDE4B	12_MACS_peak_1723_lociStitched (+514928)
PDE4DIP	11_MACS_peak_2405_lociStitched (+14877)
PDE6A	6_MACS_peak_32391_lociStitched (+142193)
PDE9A	3_MACS_peak_25269_lociStitched (-129246)
PDGFB	6_MACS_peak_26159_lociStitched (+2639)
PDGFRL	18_MACS_peak_37482_lociStitched (+75211)
PDK2	5_MACS_peak_17157_lociStitched (-9248)
PDLIM1	15_MACS_peak_5730_lociStitched (-139299)
PDLIM3	5_MACS_peak_30739_lociStitched (-44245), 6_MACS_peak_30738_lociStitched (+13655)
PDLIM5	5_MACS_peak_29966_lociStitched (-19359)
PDZRN3	12_MACS_peak_27724_lociStitched (+43571)
PEA15	4_MACS_peak_2788_lociStitched (-1658)
PER1	MACS_peak_16193 (-3110)
PFDN1	6_MACS_peak_32144_lociStitched (-15239), 11_MACS_peak_32131_lociStitched (+81883)
PFKFB3	12_MACS_peak_4343_lociStitched (-18160)
PFKM	1_MACS_peak_9110_lociStitched (+20552)
PFN2	5_MACS_peak_28507_lociStitched (-106545)
PGAP3	4_MACS_peak_16770_lociStitched (+18284)
PGBD5	15_MACS_peak_3967_lociStitched (+191474)
PHC2	6_MACS_peak_1000_lociStitched (+17624)
PHLDA3	7_MACS_peak_3338_lociStitched (-15000)
PHLDB1	9_MACS_peak_8216_lociStitched (+6213)
PIGF	5_MACS_peak_21293_lociStitched (+61562)
PIK3C2B	12_MACS_peak_3449_lociStitched (+6864)
PIM1	9_MACS_peak_33717_lociStitched (-98285)
PITPNM2	14_MACS_peak_10348_lociStitched (+9822)
PITRM1	1_MACS_peak_4268_lociStitched (-608420)
PITX1	10_MACS_peak_31989_lociStitched (-206376)
PIWIL4	14_MACS_peak_7905_lociStitched (+186499)
PKIG	7_MACS_peak_24509_lociStitched (+62619)
PKM	6_MACS_peak_13594_lociStitched (+12209)
PLA1A	4_MACS_peak_28008_lociStitched (+45077)
PLAC9	3_MACS_peak_5500_lociStitched (+63892)
PLB1	8_MACS_peak_20927_lociStitched (+113791)
PLEC	3_MACS_peak_38990_lociStitched (-2371)
PLEKHA1	15_MACS_peak_6225_lociStitched (-339669), 7_MACS_peak_6233_lociStitched (-247532)
PLEKHA3	9_MACS_peak_22860_lociStitched (+310407)
PLEKHA4	3_MACS_peak_20193_lociStitched (-4108)
PLEKHF1	8_MACS_peak_19646_lociStitched (+20668)
PLEKHG4B	1_MACS_peak_30765_lociStitched (+52082)
PLEKHH2	8_MACS_peak_21195_lociStitched (-392302), 8_MACS_peak_21201_lociStitched (-314731)
PLEKHM2	10_MACS_peak_439_lociStitched (+25505)
PLGLB1	9_MACS_peak_21847_lociStitched (-544560), 2_MACS_peak_21835_lociStitched (-56417)
PLGLB2	2_MACS_peak_21835_lociStitched (-742214), 9_MACS_peak_21847_lociStitched (-254071)
PLN	8_MACS_peak_34520_lociStitched (-15769)
PLXND1	4_MACS_peak_28258_lociStitched (-67270), 10_MACS_peak_28253_lociStitched (+14191)
PMFBP1	13_MACS_peak_15468_lociStitched (-856207)
PNMA1	10_MACS_peak_12193_lociStitched (-39641)
PNMT	4_MACS_peak_16770_lociStitched (+1665)
PNRC1	2_MACS_peak_34207_lociStitched (+1459)
POLR2J	4_MACS_peak_36623_lociStitched (-31452)
POLR2J3	4_MACS_peak_36630_lociStitched (-36888)
POLR3GL	MACS_peak_2431 (+18566)
POM121	1_MACS_peak_36199_lociStitched (-49897)
POPDC2	4_MACS_peak_28008_lociStitched (+17671)
POU2F1	5_MACS_peak_2930_lociStitched (-118418)
PPAPDC3	11_MACS_peak_40616_lociStitched (-7078)
PPARA	MACS_peak_26368 (-67237)
PPARGC1B	6_MACS_peak_32391_lociStitched (+72289)
PPFIA4	2_MACS_peak_3401_lociStitched (-18541)
PPIAL4B	3_MACS_peak_2398_lociStitched (-328145), 1_MACS_peak_2394_lociStitched (-172625)
PPIF	14_MACS_peak_5464_lociStitched (-221159), 11_MACS_peak_5485_lociStitched (+67369)
PPP1CB	8_MACS_peak_20927_lociStitched (-141990)
PPP1R10	1_MACS_peak_33467_lociStitched (+1995)
PPP1R15A	3_MACS_peak_20193_lociStitched (+348)
PPP1R15B	12_MACS_peak_3449_lociStitched (-71769)
PPP1R27	4_MACS_peak_17976_lociStitched (+2328)
PPP1R3B	4_MACS_peak_37370_lociStitched (+4627)
PPP1R3C	8_MACS_peak_5652_lociStitched (+25595)
PPP2CA	7_MACS_peak_31951_lociStitched (-7272)
PPP2R1B	2_MACS_peak_8055_lociStitched (+37700)
PPP2R4	2_MACS_peak_40559_lociStitched (+379439)
PPP4C	3_MACS_peak_14894_lociStitched (-11889)
PPP4R2	12_MACS_peak_27724_lociStitched (+584584)
PPTC7	10_MACS_peak_10060_lociStitched (+19245)
PQLC2	21_MACS_peak_557_lociStitched (+128904)
PRIMA1	5_MACS_peak_12525_lociStitched (-178049)
PRKCH	16_MACS_peak_11902_lociStitched (+207299)
PRMT8	6_MACS_peak_8576_lociStitched (-259871)
PRODH	5_MACS_peak_25505_lociStitched (+18654)
PRPS1	12_MACS_peak_41480_lociStitched (+110473)
PSAP	9_MACS_peak_5238_lociStitched (-11721)
PSD2	8_MACS_peak_32110_lociStitched (-128345)
PSMB1	3_MACS_peak_35310_lociStitched (+14750)
PSMG1	7_MACS_peak_25203_lociStitched (+274089)
PTCD2	13_MACS_peak_31366_lociStitched (+152781)
PTMA	8_MACS_peak_23526_lociStitched (-86539), 8_MACS_peak_23535_lociStitched (-18993)
PTP4A1	3_MACS_peak_34060_lociStitched (-7805)
PTP4A2	7_MACS_peak_943_lociStitched (-1557)
PTP4A3	4_MACS_peak_38939_lociStitched (+19344)
PTPN1	11_MACS_peak_24688_lociStitched (-219358), 7_MACS_peak_24704_lociStitched (-100251)
PTPRQ	3_MACS_peak_9601_lociStitched (+250505)
PTRF	13_MACS_peak_16893_lociStitched (+15813)
PTX3	3_MACS_peak_28606_lociStitched (-271312)
PXN	8_MACS_peak_10219_lociStitched (+19822)
QKI	3_MACS_peak_35195_lociStitched (-69315), 2_MACS_peak_35197_lociStitched (-1286), 4_MACS_peak_35217_lociStitched (+539842), 3_MACS_peak_35222_lociStitched (+682954)
RAB14	4_MACS_peak_40252_lociStitched (-81947)
RAB17	22_MACS_peak_23682_lociStitched (-81214)
RAB20	18_MACS_peak_11279_lociStitched (+202294)
RAB31	11_MACS_peak_18178_lociStitched (+121972)
RAB7A	9_MACS_peak_28212_lociStitched (+65673)
RAD51B	29_MACS_peak_12062_lociStitched (+789160)
RAD9B	10_MACS_peak_10060_lociStitched (+61836)
RAI1	8_MACS_peak_16387_lociStitched (+146846)
RALGDS	5_MACS_peak_40671_lociStitched (-7723)
RAMP1	5_MACS_peak_23694_lociStitched (+35172)
RAPGEF2	10_MACS_peak_30567_lociStitched (-469743)
RARA	9_MACS_peak_16808_lociStitched (+6902)
RASA2	5_MACS_peak_28403_lociStitched (-65257)
RASA4	4_MACS_peak_36630_lociStitched (+7330)
RASA4B	4_MACS_peak_36623_lociStitched (+7351)
RASGRP3	6_MACS_peak_21002_lociStitched (-12585)
RASSF8	3_MACS_peak_8907_lociStitched (+155873)
RBFOX1	9_MACS_peak_14480_lociStitched (+25937)
RBFOX2	15_MACS_peak_25994_lociStitched (+149978)
RBKS	14_MACS_peak_20913_lociStitched (-476289)
RBM17	12_MACS_peak_4343_lociStitched (+95425)
RBM20	14_MACS_peak_6014_lociStitched (+37839)
RBM24	6_MACS_peak_33245_lociStitched (+12815)
RBM38	9_MACS_peak_24799_lociStitched (+63207)
RBM7	6_MACS_peak_8131_lociStitched (-98744)
RBMS1	6_MACS_peak_22594_lociStitched (+267991)
RCSD1	7_MACS_peak_2943_lociStitched (+27605)
RERE	19_MACS_peak_182_lociStitched (+402317)
REV3L	10_MACS_peak_34410_lociStitched (-95232)
RFX3	4_MACS_peak_39089_lociStitched (+13754)
RGMA	MACS_peak_14052 (+168298)
RGS9	3_MACS_peak_17473_lociStitched (+416011)
RHOBTB1	13_MACS_peak_5035_lociStitched (+61576)
RHOF	MACS_peak_10288 (-4838)
RHOQ	5_MACS_peak_21293_lociStitched (+12829)
RIF1	4_MACS_peak_22507_lociStitched (+312745)
RIOK2	6_MACS_peak_31636_lociStitched (+244550)
RLBP1	15_MACS_peak_13938_lociStitched (+93991)
RNASEH2B	8_MACS_peak_10986_lociStitched (-505702)
RNF103	3_MACS_peak_21831_lociStitched (-89437)
RNF122	1_MACS_peak_37789_lociStitched (+6829)
RNF123	2_MACS_peak_27363_lociStitched (+4324)
RNF144B	8_MACS_peak_33292_lociStitched (+19656)
ROS1	6_MACS_peak_34491_lociStitched (+141385)
RPL19	3_MACS_peak_16762_lociStitched (+5207)
RPL26L1	14_MACS_peak_32691_lociStitched (-76542)
RPL31	5_MACS_peak_21997_lociStitched (+127270)
RPL7L1	4_MACS_peak_33813_lociStitched (-88457)
RPLP0	8_MACS_peak_10219_lociStitched (-44839)
RRAD	MACS_peak_15237 (+878)
RREB1	9_MACS_peak_33059_lociStitched (+32136)
RTKN2	11_MACS_peak_5068_lociStitched (+201843)
RTN4	4_MACS_peak_21405_lociStitched (+59306)
RTP2	5_MACS_peak_28945_lociStitched (-32864)
RUFY4	12_MACS_peak_23294_lociStitched (-118484)
RUNX1	7_MACS_peak_25111_lociStitched (-162978)
RUSC2	6_MACS_peak_39392_lociStitched (-29263)
RXFP4	3_MACS_peak_2709_lociStitched (+30908)
RXRA	9_MACS_peak_40720_lociStitched (+25185)
SAE1	MACS_peak_20121 (+98487)
SAMD4A	9_MACS_peak_11751_lociStitched (+125857)
SAMD8	2_MACS_peak_5361_lociStitched (-677)
SBDS	1_MACS_peak_36165_lociStitched (+182)
SCARB2	3_MACS_peak_29789_lociStitched (+6918)
SCD	2_MACS_peak_5842_lociStitched (+22479)
SCHIP1	8_MACS_peak_28628_lociStitched (+14934)
SCN4A	6_MACS_peak_17427_lociStitched (-2274)
SCNN1A	7_MACS_peak_8629_lociStitched (+27548)
SCYL1	MACS_peak_7421 (-102066), 3_MACS_peak_7426_lociStitched (-34474)
SDC4	MACS_peak_24527 (+6021)
SDHA	1_MACS_peak_30765_lociStitched (-25901)
SDHB	6_MACS_peak_501_lociStitched (-47791)
SDR42E2	8_MACS_peak_14746_lociStitched (+33945)
SEC13	8_MACS_peak_26568_lociStitched (-129466)
SEC14L1	9_MACS_peak_17760_lociStitched (+42686)
SEC61B	3_MACS_peak_39925_lociStitched (+139046)
SELPLG	5_MACS_peak_9962_lociStitched (-51621)
SEMA3C	6_MACS_peak_36373_lociStitched (+296410)
SEMA6C	4_MACS_peak_2534_lociStitched (+9299)
SENP6	2_MACS_peak_34132_lociStitched (-113655)
2009-09-01	9_MACS_peak_17760_lociStitched (-149975)
SERBP1	5_MACS_peak_1754_lociStitched (-13463)
SERINC2	5_MACS_peak_922_lociStitched (-30639)
SERPINF1	11_MACS_peak_15951_lociStitched (+19296)
SESN1	1_MACS_peak_34368_lociStitched (+7327), 9_MACS_peak_34341_lociStitched (+505298)
SESN3	8_MACS_peak_7926_lociStitched (+136877)
SETBP1	9_MACS_peak_18435_lociStitched (+112157)
SETD4	7_MACS_peak_25111_lociStitched (+847940)
SEZ6L	5_MACS_peak_25706_lociStitched (-415927)
SGIP1	12_MACS_peak_1723_lociStitched (-226840)
SH2B2	12_MACS_peak_36605_lociStitched (-364881)
SH3BP5	3_MACS_peak_26726_lociStitched (+3463)
SH3PXD2A	6_MACS_peak_5965_lociStitched (+94137)
SHISA4	8_MACS_peak_3359_lociStitched (+10560)
SIK2	2_MACS_peak_8055_lociStitched (+126291)
SIVA1	6_MACS_peak_12730_lociStitched (-16060)
SIX1	5_MACS_peak_11868_lociStitched (-4810)
SKIDA1	2_MACS_peak_4521_lociStitched (-1013)
SLC14A2	9_MACS_peak_18435_lociStitched (-821746)
SLC15A4	4_MACS_peak_10444_lociStitched (+13368)
SLC16A6	8_MACS_peak_17533_lociStitched (-162390)
SLC19A2	1_MACS_peak_2984_lociStitched (+471)
SLC24A6	10_MACS_peak_10120_lociStitched (+102363)
SLC25A1	6_MACS_peak_25516_lociStitched (-97628)
SLC25A25	6_MACS_peak_40480_lociStitched (+23668)
SLC25A34	10_MACS_peak_439_lociStitched (-26568)
SLC28A1	2_MACS_peak_13845_lociStitched (-53573)
SLC29A1	3_MACS_peak_33874_lociStitched (+9231)
SLC2A2	9_MACS_peak_28706_lociStitched (-288170)
SLC2A9	5_MACS_peak_29393_lociStitched (-82352)
SLC35F1	8_MACS_peak_34520_lociStitched (+625003)
SLC37A1	3_MACS_peak_25269_lociStitched (+10595)
SLC38A2	3_MACS_peak_9060_lociStitched (-6711)
SLC38A4	3_MACS_peak_9060_lociStitched (+446419)
SLC40A1	15_MACS_peak_22964_lociStitched (+53499)
SLC44A1	3_MACS_peak_39964_lociStitched (-248925)
SLC45A1	19_MACS_peak_182_lociStitched (+97321)
SLC48A1	8_MACS_peak_9099_lociStitched (+38394)
SLC6A6	6_MACS_peak_26700_lociStitched (+135060)
SLC7A2	7_MACS_peak_37461_lociStitched (-16063)
SLC9A5	2_MACS_peak_15257_lociStitched (+1175)
SLCO4A1	MACS_peak_24882 (-116872)
SLN	3_MACS_peak_8007_lociStitched (+10143)
SMAD3	20_MACS_peak_13472_lociStitched (+69348)
SMAD7	9_MACS_peak_18522_lociStitched (+9239)
SMC5	3_MACS_peak_39522_lociStitched (+147785)
SMIM19	15_MACS_peak_37929_lociStitched (-38206)
SMU1	6_MACS_peak_39314_lociStitched (-76426)
SMYD4	11_MACS_peak_15951_lociStitched (+48626)
SNTA1	7_MACS_peak_24258_lociStitched (+12655)
SNX6	3_MACS_peak_11579_lociStitched (+82070)
SOCS3	17_MACS_peak_17859_lociStitched (-3875)
SORBS1	15_MACS_peak_5730_lociStitched (+131055)
SORBS2	5_MACS_peak_30739_lociStitched (+376899)
SORBS3	3_MACS_peak_37572_lociStitched (-341)
SORT1	4_MACS_peak_2144_lociStitched (+11475)
SPAG17	2_MACS_peak_2358_lociStitched (-111991)
SPAG9	3_MACS_peak_17215_lociStitched (-5141), 5_MACS_peak_17207_lociStitched (+174095)
SPARC	7_MACS_peak_32495_lociStitched (+5752)
SPATA4	6_MACS_peak_30668_lociStitched (-55017)
SPEG	12_MACS_peak_23352_lociStitched (-4787)
SPEN	4_MACS_peak_444_lociStitched (-6047)
SPPL2A	6_MACS_peak_13130_lociStitched (-15398)
SPRY1	5_MACS_peak_30220_lociStitched (+3252), 13_MACS_peak_30246_lociStitched (+443145)
SPSB1	6_MACS_peak_225_lociStitched (-38916)
SPTB	6_MACS_peak_11975_lociStitched (-8792)
SQSTM1	5_MACS_peak_32853_lociStitched (+8471)
SREBF1	8_MACS_peak_16387_lociStitched (+8668)
SRL	7_MACS_peak_14420_lociStitched (+9708)
SRP14	5_MACS_peak_12922_lociStitched (-47043)
SRR	6_MACS_peak_15979_lociStitched (-230430), 11_MACS_peak_15989_lociStitched (-95300)
SRSF10	9_MACS_peak_691_lociStitched (-116292)
SRSF12	2_MACS_peak_34207_lociStitched (+35844)
SRSF5	13_MACS_peak_12124_lociStitched (-73267)
SSH1	15_MACS_peak_9972_lociStitched (+42946)
SSH2	23_MACS_peak_16596_lociStitched (+235977)
SSR1	9_MACS_peak_33059_lociStitched (+173263)
STAC	5_MACS_peak_27024_lociStitched (-720444)
STAC2	3_MACS_peak_16762_lociStitched (+20382)
STAT3	13_MACS_peak_16893_lociStitched (-19136)
STK40	5_MACS_peak_1076_lociStitched (+2288)
STOM	11_MACS_peak_40263_lociStitched (+24322)
STX10	4_MACS_peak_19319_lociStitched (-3766)
STYK1	3_MACS_peak_8741_lociStitched (-40651)
SUFU	7_MACS_peak_5906_lociStitched (+119519)
SUN1	12_MACS_peak_35347_lociStitched (-28851)
SUPT3H	11_MACS_peak_33895_lociStitched (-604722)
SVIL	16_MACS_peak_4641_lociStitched (+102613)
SYK	3_MACS_peak_39723_lociStitched (+405565)
SYNM	6_MACS_peak_14161_lociStitched (+16354), 2_MACS_peak_14162_lociStitched (+68964)
SYNPO	14_MACS_peak_32443_lociStitched (+29069)
SYNPO2	10_MACS_peak_30166_lociStitched (+113866)
TACC2	15_MACS_peak_6225_lociStitched (+45834), 7_MACS_peak_6233_lociStitched (+137971)
TACR2	11_MACS_peak_5158_lociStitched (+66032)
TARBP1	8_MACS_peak_4049_lociStitched (-120006), 7_MACS_peak_4037_lociStitched (-41451)
TBC1D10B	2_MACS_peak_14910_lociStitched (-4473)
TBC1D22A	7_MACS_peak_26402_lociStitched (-9484)
TBC1D4	11_MACS_peak_11075_lociStitched (+40498)
TBC1D8	5_MACS_peak_21997_lociStitched (+21700)
TBCC	4_MACS_peak_33813_lociStitched (-44358)
TBL1XR1	5_MACS_peak_28766_lociStitched (-151163)
TBX15	2_MACS_peak_2358_lociStitched (+692342)
TDRD10	8_MACS_peak_2636_lociStitched (-83016)
TEAD1	6_MACS_peak_6759_lociStitched (-60866)
TEAD4	10_MACS_peak_8555_lociStitched (+26925)
TEF	9_MACS_peak_26232_lociStitched (+43573)
TENC1	5_MACS_peak_9239_lociStitched (+7264)
TEX2	5_MACS_peak_17434_lociStitched (+101165)
TFEB	6_MACS_peak_33784_lociStitched (+14820)
TFF3	1_MACS_peak_25262_lociStitched (+87139)
TFIP11	11_MACS_peak_25726_lociStitched (-45031)
TGFB2	10_MACS_peak_3689_lociStitched (+34135)
TGIF1	1_MACS_peak_18107_lociStitched (-972)
THRA	MACS_peak_16796 (+33102)
THRAP3	8_MACS_peak_1050_lociStitched (-62413), 16_MACS_peak_1069_lociStitched (+37497)
TIAF1	10_MACS_peak_16571_lociStitched (-50661)
TLCD2	MACS_peak_15945 (-5431)
TLR2	14_MACS_peak_30529_lociStitched (-180903)
TM2D1	7_MACS_peak_1615_lociStitched (+615882)
TM6SF1	11_MACS_peak_13822_lociStitched (-23697)
TMBIM1	MACS_peak_23310 (-346)
TMCC1	4_MACS_peak_28258_lociStitched (+206378)
TMED10	9_MACS_peak_12252_lociStitched (-89891)
TMEM106A	2_MACS_peak_16948_lociStitched (+103657)
TMEM11	12_MACS_peak_16486_lociStitched (+3778)
TMEM110	2_MACS_peak_27468_lociStitched (+57278)
TMEM131	2_MACS_peak_21956_lociStitched (-169214)
TMEM132C	4_MACS_peak_10444_lociStitched (+543212)
TMEM140	3_MACS_peak_37011_lociStitched (+9957)
TMEM14E	MACS_peak_28541 (+65532)
TMEM160	2_MACS_peak_20115_lociStitched (-55455)
TMEM161B	7_MACS_peak_31532_lociStitched (-625708)
TMEM182	11_MACS_peak_22050_lociStitched (+29672)
TMEM183A	2_MACS_peak_3401_lociStitched (+25256)
TMEM184A	2_MACS_peak_35377_lociStitched (+18239)
TMEM189-UBE2V1	16_MACS_peak_24676_lociStitched (+18255)
TMEM211	9_MACS_peak_25689_lociStitched (-191516)
TMEM233	7_MACS_peak_10194_lociStitched (-401383)
TMEM30A	2_MACS_peak_34132_lociStitched (-203424)
TMEM30B	6_MACS_peak_11886_lociStitched (+156361)
TMEM63B	5_MACS_peak_33848_lociStitched (-338400), 3_MACS_peak_33860_lociStitched (-126513)
TNFRSF1A	7_MACS_peak_8629_lociStitched (-5562)
TNFRSF1B	11_MACS_peak_367_lociStitched (+300855), 12_MACS_peak_379_lociStitched (+421290)
TNIK	9_MACS_peak_28706_lociStitched (+145488)
TNIP1	10_MACS_peak_32464_lociStitched (-11034), 4_MACS_peak_32458_lociStitched (+57138)
TNK2	9_MACS_peak_29129_lociStitched (+6422)
TNNI1	5_MACS_peak_3333_lociStitched (+3443)
TNNT3	MACS_peak_6499 (+4917)
TNP1	9_MACS_peak_23286_lociStitched (-970365), 3_MACS_peak_23259_lociStitched (+58597)
TNRC18	1_MACS_peak_35453_lociStitched (-814)
TNS1	12_MACS_peak_23294_lociStitched (-6643), 9_MACS_peak_23286_lociStitched (+113699)
TNS4	6_MACS_peak_16818_lociStitched (-34748)
TOB1	5_MACS_peak_17207_lociStitched (-80425), 3_MACS_peak_17199_lociStitched (+9601)
TOB2	9_MACS_peak_26232_lociStitched (+21521)
TOM1	5_MACS_peak_25962_lociStitched (+15012)
TOMM20	9_MACS_peak_4084_lociStitched (+172757), 15_MACS_peak_4066_lociStitched (+261402), 3_MACS_peak_4055_lociStitched (+442653)
TOX2	8_MACS_peak_24494_lociStitched (+252863)
TPCN1	10_MACS_peak_10120_lociStitched (+11207)
TPM1	3_MACS_peak_13346_lociStitched (+8744)
TPM2	1_MACS_peak_39405_lociStitched (+4031)
TPRG1	9_MACS_peak_28977_lociStitched (-893783), 7_MACS_peak_29019_lociStitched (-211566)
TPST2	11_MACS_peak_25726_lociStitched (+32625)
TRAF3IP2	10_MACS_peak_34410_lociStitched (+27302)
TRAK1	11_MACS_peak_27110_lociStitched (-44177)
TRDN	6_MACS_peak_34574_lociStitched (+3005)
TREH	9_MACS_peak_8216_lociStitched (+67013)
TRIB1	6_MACS_peak_38718_lociStitched (+19726)
TRIM54	4_MACS_peak_20868_lociStitched (+9190)
TRIM8	7_MACS_peak_5906_lociStitched (-20990)
TRMT5	6_MACS_peak_11886_lociStitched (-144121)
TRPM4	3_MACS_peak_20210_lociStitched (-390)
TSC22D1	4_MACS_peak_10874_lociStitched (-341754)
TSC22D2	5_MACS_peak_28507_lociStitched (-330681)
TSC22D3	12_MACS_peak_41480_lociStitched (+36807)
TSPAN15	10_MACS_peak_5173_lociStitched (+21725)
TSPAN9	10_MACS_peak_8555_lociStitched (-91038), 6_MACS_peak_8576_lociStitched (+153988)
TTC7A	9_MACS_peak_21325_lociStitched (+118976)
TTN	6_MACS_peak_22868_lociStitched (-70046), 9_MACS_peak_22860_lociStitched (+16548)
TUBA8	1_MACS_peak_25500_lociStitched (+4766)
TUBD1	5_MACS_peak_17356_lociStitched (+53413)
TWIST1	5_MACS_peak_35581_lociStitched (+602368)
TWIST2	18_MACS_peak_23737_lociStitched (+441084)
TXLNB	14_MACS_peak_34794_lociStitched (+34268)
TXN2	9_MACS_peak_26051_lociStitched (+26202)
TXNDC2	11_MACS_peak_18178_lociStitched (-55839)
TXNIP	MACS_peak_2431 (+13352)
TYW1	1_MACS_peak_36165_lociStitched (-1396), 3_MACS_peak_36171_lociStitched (+338657)
UBC	5_MACS_peak_10438_lociStitched (-7382)
UBE2D3	2_MACS_peak_30049_lociStitched (+50724)
UBE2F	5_MACS_peak_23694_lociStitched (-72238)
UBE2G1	13_MACS_peak_16059_lociStitched (+31978)
UBE2V1	16_MACS_peak_24676_lociStitched (-19428)
UCN	4_MACS_peak_20868_lociStitched (+16793)
UGP2	7_MACS_peak_21491_lociStitched (+6407)
ULK4	11_MACS_peak_27110_lociStitched (-84463)
UNC13B	6_MACS_peak_39392_lociStitched (+347307)
UNK	3_MACS_peak_17701_lociStitched (-4733)
UPK2	3_MACS_peak_8229_lociStitched (-35712)
UQCR10	14_MACS_peak_25833_lociStitched (+62069)
USP18	1_MACS_peak_25500_lociStitched (-34341)
USP2	2_MACS_peak_8251_lociStitched (+12330)
USP40	3_MACS_peak_23571_lociStitched (+138159)
UTP11L	5_MACS_peak_1107_lociStitched (+213)
VAC14	10_MACS_peak_15418_lociStitched (+84126)
VASH1	6_MACS_peak_12317_lociStitched (+264576)
VCP	2_MACS_peak_39371_lociStitched (+77907)
VDAC3	15_MACS_peak_37929_lociStitched (+108671)
VEGFA	5_MACS_peak_33848_lociStitched (+17807), 3_MACS_peak_33860_lociStitched (+229694)
VEZF1	19_MACS_peak_17289_lociStitched (+93822)
VGLL2	6_MACS_peak_34491_lociStitched (+18896)
VMP1	5_MACS_peak_17356_lociStitched (+132057)
VOPP1	9_MACS_peak_36083_lociStitched (+32836)
VPS54	7_MACS_peak_21491_lociStitched (+170955)
WASF2	14_MACS_peak_826_lociStitched (-56184)
WBP1L	11_MACS_peak_5917_lociStitched (+41563)
WDR1	5_MACS_peak_29393_lociStitched (+13025)
WDR75	15_MACS_peak_22964_lociStitched (+85955)
WDR81	MACS_peak_15945 (-9091)
WDYHV1	8_MACS_peak_38638_lociStitched (+107036)
WFIKKN2	3_MACS_peak_17199_lociStitched (+21334)
WHAMM	1_MACS_peak_13804_lociStitched (-4508)
WIPI1	8_MACS_peak_17533_lociStitched (+3915)
WNT16	10_MACS_peak_36815_lociStitched (-320863)
WNT7B	MACS_peak_26368 (-106253)
WNT8B	2_MACS_peak_5842_lociStitched (-93438)
XCL1	4_MACS_peak_2967_lociStitched (+45839)
XIRP1	2_MACS_peak_27078_lociStitched (+5214)
XIRP2	4_MACS_peak_22657_lociStitched (+310753)
XRCC6BP1	12_MACS_peak_9409_lociStitched (-80327)
YBX3	3_MACS_peak_8741_lociStitched (+8369)
YIPF2	11_MACS_peak_19217_lociStitched (+37124)
YPEL2	16_MACS_peak_17323_lociStitched (+53013)
YWHAG	14_MACS_peak_36315_lociStitched (+30835)
ZBTB16	22_MACS_peak_8110_lociStitched (+99741)
ZBTB38	5_MACS_peak_28403_lociStitched (+33980)
ZBTB48	6_MACS_peak_121_lociStitched (+21782)
ZBTB7B	3_MACS_peak_2672_lociStitched (+5977)
ZC3H3	10_MACS_peak_38968_lociStitched (+76694)
ZC3H4	2_MACS_peak_20115_lociStitched (+9666)
ZCCHC24	11_MACS_peak_5485_lociStitched (+30780)
ZCCHC8	11_MACS_peak_10322_lociStitched (+113922)
ZDHHC15	2_MACS_peak_41399_lociStitched (-624299)
ZDHHC22	5_MACS_peak_12324_lociStitched (+32725)
ZEB2	2_MACS_peak_22455_lociStitched (+10531)
ZFAND5	2_MACS_peak_39548_lociStitched (+6162)
ZFHX3	13_MACS_peak_15468_lociStitched (+19913)
ZFHX4	3_MACS_peak_38197_lociStitched (-2536)
ZFP36	2_MACS_peak_19870_lociStitched (-868)
ZFP36L1	5_MACS_peak_12090_lociStitched (-5365), 29_MACS_peak_12062_lociStitched (+184272)
ZFP36L2	8_MACS_peak_21201_lociStitched (-95933), 8_MACS_peak_21195_lociStitched (-18362)
ZFP62	5_MACS_peak_32872_lociStitched (+44543)
ZFP91	1_MACS_peak_7214_lociStitched (-1566)
ZFP91-CNTF	1_MACS_peak_7214_lociStitched (-1627)
ZMIZ1	14_MACS_peak_5464_lociStitched (+57283)
ZMYND8	5_MACS_peak_24577_lociStitched (+18357)
ZNF236	12_MACS_peak_18762_lociStitched (+264325)
ZNF366	13_MACS_peak_31366_lociStitched (+34579)
ZNF423	6_MACS_peak_15052_lociStitched (-12479)
ZNF622	3_MACS_peak_30940_lociStitched (-75014), 4_MACS_peak_30938_lociStitched (-33086)
ZNF664	10_MACS_peak_10396_lociStitched (+423736)
ZNRF1	4_MACS_peak_15510_lociStitched (+102012)
ZSWIM4	MACS_peak_19332 (+44921)

## Sheet: SKELETAL MUSCLE RBPs
98 common elements in "RBPs" and "SKEL MUSCLE SEs":
ADAR
AFF1
AGO2
AKAP1
APOBEC2
ASCC1
ATXN1
AUH
BCLAF1
BZW2
CDK5RAP1
CNBP
CPEB4
CSDE1
CTIF
DDX3X
DHX37
DHX40
EEF1G
EEF2K
ERI1
ERN1
FAM120B
FASTKD1
FUBP1
GAPDH
HELZ
HNRNPA0
HNRNPA2B1
HNRNPA3
HNRNPL
HNRNPU
ISY1
KIAA0020
LRRFIP1
MAK16
MBNL1
MRPL23
MRPL24
MRPS18B
MRPS23
MSI2
NANOS3
NOA1
NUFIP1
NXT1
PCBP1
PDCD4
PIWIL4
POLR2J
POLR2J3
PPARGC1B
PPP1R10
PTCD2
PTRF
QKI
RBFOX1
RBFOX2
RBM17
RBM20
RBM24
RBM38
RBM7
RBMS1
RIOK2
RNASEH2B
RPL19
RPL26L1
RPL31
RPL7L1
RPLP0
SAMD4A
SBDS
SERBP1
SMAD3
SMAD7
SPEN
SRP14
SRSF10
SRSF12
SRSF5
TARBP1
TDRD10
TFIP11
THRAP3
TRMT5
TYW1
UNK
UTP11L
YBX3
ZC3H3
ZC3H4
ZCCHC24
ZCCHC8
ZFP36
ZFP36L1
ZFP36L2
ZNF622
