# Supplementary material for: Identification of RBPMS as a mammalian smooth muscle master splicing regulator via proximity of its gene with super-enhancers
Source: eLife. 2019 Jul 8;8:e46327. doi: 10.7554/eLife.46327 (PMC6613909; doi:10.7554/eLife.46327)
Supplement: Supplementary file 2. [file elife-46327-supp2.xlsx]

## Sheet: Sheet1
Genes with significant changes in mRNA abundance (padj < 0.05 and log2FC > 1 or < -1)
Gene name, Ensembl name, log2 Fold Change and p-adj value detected by using DEseq as described in Methods.
Samples
T	Rat aorta tissue
P9	Rat aorta Passage 9
D Ctr	Control Differentiated PAC1
D KD	RBPMS KD in Differentiated PAC1
P Ctr	Control Proliferative PAC1 (minus Dox)
P OE	RBPMSA overexpression Proliferative PAC1 (plus Dox)
Comparisons
(T vs P9)	Rat aorta dedifferentiation
(D Ctr vs P Ctr)	PAC1 dedifferentiation
(D KD vs D Ctr)	RBPMS knockdown in PAC1 cells
(P OE vs P Ctr)	RBPMS overexpression in PAC1 cells

## Sheet: T vs P9
Gene.name	Ensembl	log2.Fold.Change	padj.value
Atf3	ENSRNOG00000003745	-8.65279	0
Speg	ENSRNOG00000019850	-7.17818	0
Ecm2	ENSRNOG00000031716	-6.7527	0
PCOLCE2	ENSRNOG00000046848	-5.98482	0
Btg2	ENSRNOG00000003300	-5.67133	0
Csrp2	ENSRNOG00000003772	-5.49519	0
Ppp1r12c	ENSRNOG00000053828	-2.4197	0
Marcks	ENSRNOG00000000579	4.77002	0
Lmo7	ENSRNOG00000060775	6.22848	0
Ralgapa2	ENSRNOG00000036964	-4.70178	1.39477e-292
Kansl1l	ENSRNOG00000028149	-3.68485	1.10231e-270
Otud1	ENSRNOG00000016950	-5.63132	1.12851e-255
Arid5a	ENSRNOG00000015382	-6.35368	5.51114e-254
Junb	ENSRNOG00000042838	-3.91218	2.58475e-252
Ier2	ENSRNOG00000054344	-3.66469	1.63045e-245
Socs3	ENSRNOG00000002946	-5.35555	2.04234e-241
Atrnl1	ENSRNOG00000017406	-2.86515	1.01364e-240
Gem	ENSRNOG00000015160	-7.47424	1.82547e-235
Zbtb10	ENSRNOG00000061862	-2.68017	7.22577e-227
Myh9l1	ENSRNOG00000049236	2.86373	4.79895e-225
Tacc2	ENSRNOG00000020457	-4.70702	1.17691e-222
Rn50_8_0646.1	ENSRNOG00000053753	-8.16881	2.77046e-219
Sparcl1	ENSRNOG00000015093	-10.6725	2.31885e-215
Twsg1	ENSRNOG00000013340	-3.52723	7.20194e-210
Tmem117	ENSRNOG00000006068	-4.5966	1.37841e-209
Rrad	ENSRNOG00000011901	-7.40524	6.14303e-209
Mt-nd4l	ENSRNOG00000031053	-4.16078	3.76651e-203
Arpc1b	ENSRNOG00000000991	2.11092	1.13909e-200
Cfh	ENSRNOG00000030715	-8.95841	1.90318e-198
Tubb5	ENSRNOG00000061216	3.06887	2.75993e-198
Rasl12	ENSRNOG00000032339	-7.7301	1.1529e-195
Jun	ENSRNOG00000026293	-5.69165	2.3019e-193
Ptprj	ENSRNOG00000034025	-3.16059	4.98479e-193
Esm1	ENSRNOG00000010797	7.20045	2.53336e-187
Galnt16	ENSRNOG00000004589	-9.05741	3.34901e-187
Bmpr1b	ENSRNOG00000016289	-5.99914	4.04216e-187
Ldhb	ENSRNOG00000013000	-3.54619	1.44974e-185
Fos	ENSRNOG00000008015	-5.23091	1.04278e-184
Bcam	ENSRNOG00000029399	-6.92903	4.20093e-183
Sema5a	ENSRNOG00000011977	-4.50626	8.82193e-183
Tnxb	ENSRNOG00000033581	-6.96257	2.98356e-182
Hspa1b	ENSRNOG00000050647	-6.61396	1.35369e-181
Gfra1	ENSRNOG00000017438	-5.88893	4.85843e-180
Rassf3	ENSRNOG00000005388	-3.44084	1.67043e-178
Fhod3	ENSRNOG00000027230	-9.29223	4.93333e-176
Ttll7	ENSRNOG00000031997	-4.14642	3.66315e-171
Igfbp7	ENSRNOG00000002050	-3.23281	3.77472e-171
Pink1	ENSRNOG00000015385	-2.75786	6.269e-171
Ryr2	ENSRNOG00000017060	-10.4005	4.88904e-169
Fam46c	ENSRNOG00000015222	-6.18743	5.72857e-169
Matn2	ENSRNOG00000006060	-5.50602	1.11375e-167
Sh3bgr	ENSRNOG00000028238	-8.46647	1.22647e-166
Myom1	ENSRNOG00000057701	-8.24558	2.927e-165
Klf6	ENSRNOG00000016885	-2.53968	7.65869e-165
Crebrf	ENSRNOG00000020769	-3.27723	1.34359e-164
Map3k7cl	ENSRNOG00000001584	-4.32105	7.39176e-163
Cmya5	ENSRNOG00000023803	-6.58913	8.08849e-162
Colec12	ENSRNOG00000016366	-3.42183	1.59951e-160
Pxylp1	ENSRNOG00000012480	-2.1462	1.1459e-159
Phtf2	ENSRNOG00000013517	-3.29685	2.64664e-159
Synpo2	ENSRNOG00000014867	-5.52599	6.99763e-159
Tpm3	ENSRNOG00000017441	2.04858	2.97691e-156
Ctnnal1	ENSRNOG00000010593	-3.32564	3.94964e-153
Asns	ENSRNOG00000007546	7.60363	5.16251e-153
Col11a1	ENSRNOG00000023148	4.6947	6.32319e-145
Csrnp1	ENSRNOG00000033433	-3.38727	7.43822e-144
Slc4a3	ENSRNOG00000020138	-3.23638	2.2399e-142
LOC100359539	ENSRNOG00000008450	5.69898	3.61464e-141
Itga9	ENSRNOG00000043167	-6.30617	1.41805e-140
Sirt1	ENSRNOG00000051592	-2.09029	1.7123e-139
Jam2	ENSRNOG00000042848	-8.50627	1.92087e-139
Hr	ENSRNOG00000011427	-5.72812	1.9947e-139
Nme1	ENSRNOG00000002693	2.94567	1.32527e-135
Ptp4a3	ENSRNOG00000007628	-5.11948	2.50555e-135
Sulf1	ENSRNOG00000009037	1.97114	2.50555e-135
Cst3	ENSRNOG00000005195	-3.72998	6.05737e-134
Fyco1	ENSRNOG00000006336	-2.11643	7.27129e-134
Wisp2	ENSRNOG00000010666	3.16376	4.4075e-132
Scarb2	ENSRNOG00000002225	-1.94416	6.33748e-132
Bche	ENSRNOG00000009826	-8.15731	2.15975e-131
Phgdh	ENSRNOG00000019328	4.25707	2.54667e-130
Hrc	ENSRNOG00000020719	-7.06599	7.33772e-130
Dchs1	ENSRNOG00000031643	-9.2862	1.28598e-129
Rdh10	ENSRNOG00000006681	-3.03115	5.48782e-129
Gid4	ENSRNOG00000003847	-2.03663	1.1305e-128
Asap1	ENSRNOG00000058733	3.67361	9.69142e-128
Cbx7	ENSRNOG00000016875	-5.45705	1.14644e-127
Sh3d19	ENSRNOG00000011752	-3.96564	1.14644e-127
Sept11	ENSRNOG00000002182	2.68227	2.71111e-126
Gtse1	ENSRNOG00000016148	3.57456	6.78982e-125
Omd	ENSRNOG00000039560	-5.55359	2.0146e-122
Psat1	ENSRNOG00000013971	5.9855	2.09451e-122
Pik3cd	ENSRNOG00000016846	4.27997	5.64877e-122
Nfkbia	ENSRNOG00000007390	-3.78066	1.47554e-121
Agtpbp1	ENSRNOG00000018651	-2.56065	2.91471e-121
Cyp1b1	ENSRNOG00000040287	7.51892	7.30887e-121
Fabp5	ENSRNOG00000049075	5.27934	3.9528e-119
Caprin1	ENSRNOG00000009152	1.45612	4.67879e-118
Prima1	ENSRNOG00000008915	-7.54213	5.22519e-118
Ndrg2	ENSRNOG00000010389	-6.41735	5.26424e-118
Synm	ENSRNOG00000014030	-6.7359	5.57929e-118
Jund	ENSRNOG00000019568	-3.32838	1.09817e-117
Irf1	ENSRNOG00000008144	-3.94126	2.1459e-117
Tmem229b	ENSRNOG00000010646	-4.45903	3.38182e-115
Adgre5	ENSRNOG00000004489	-3.17468	9.75128e-115
Cd82	ENSRNOG00000000047	3.25625	1.22589e-114
Fam135a	ENSRNOG00000013587	-2.4694	1.9642e-114
Gfod1	ENSRNOG00000014007	-3.47524	2.42555e-114
Apcdd1	ENSRNOG00000043304	-5.77233	3.74039e-114
Rarres2	ENSRNOG00000024705	-6.0454	2.49206e-113
Rhob	ENSRNOG00000021403	-3.95174	3.88665e-113
Inpp5d	ENSRNOG00000017020	-7.71641	8.86714e-112
Esyt2	ENSRNOG00000032391	-1.65536	8.89682e-112
Sowahc	ENSRNOG00000048831	-2.87649	1.97993e-111
Wnk3	ENSRNOG00000002537	4.64732	5.40653e-111
Mt-cox3	ENSRNOG00000030700	-2.85015	8.07724e-111
Dusp16	ENSRNOG00000006628	-3.08302	1.20333e-110
Nfil3	ENSRNOG00000011668	-3.9766	1.86949e-110
Pde4d	ENSRNOG00000042536	-3.09386	2.33112e-110
Chpt1	ENSRNOG00000058271	-2.83413	1.05967e-109
Dusp1	ENSRNOG00000003977	-3.3018	1.52927e-109
Ttc27	ENSRNOG00000042932	-3.11722	1.2413e-108
Fbln2	ENSRNOG00000007338	6.8434	2.01761e-108
Chka	ENSRNOG00000016791	-3.26134	2.39532e-108
Col4a4	ENSRNOG00000014851	-5.51619	3.65826e-108
Stt3b	ENSRNOG00000011922	1.37732	9.9301e-108
Eef2k	ENSRNOG00000016448	-3.17738	2.34436e-107
Wls	ENSRNOG00000036816	2.98371	2.69139e-107
Plekha4	ENSRNOG00000020942	-3.25111	2.69943e-107
Tc2n	ENSRNOG00000004754	-5.7168	5.79359e-107
Mertk	ENSRNOG00000017319	-6.77004	3.88044e-106
RGD1311595	ENSRNOG00000026942	-2.48685	5.52555e-106
Mpp7	ENSRNOG00000018760	-7.71916	1.67456e-105
Cenpe	ENSRNOG00000009339	4.75261	1.159e-104
B3galnt2	ENSRNOG00000016855	-2.16334	5.85362e-104
Thbs1	ENSRNOG00000045829	9.4071	2.47726e-103
Nf1x	ENSRNOG00000002983	-2.65238	2.80057e-103
Angptl2	ENSRNOG00000016678	-3.54835	3.30879e-103
Fosb	ENSRNOG00000046667	-5.74659	3.85306e-103
Slc2a4	ENSRNOG00000017226	-9.54914	4.12755e-103
Laptm4b	ENSRNOG00000006766	-2.41702	6.55372e-103
Htra3	ENSRNOG00000008182	-3.95755	1.69591e-102
Aldh1l2	ENSRNOG00000008586	3.58315	3.86645e-102
Kcnq1	ENSRNOG00000020532	-7.0107	1.40973e-101
Rcn1	ENSRNOG00000013452	1.77797	1.27634e-100
Gstm7	ENSRNOG00000018937	-2.88583	1.6814e-100
Pygb	ENSRNOG00000007583	-1.73658	4.68625e-100
Hs6st2	ENSRNOG00000030880	9.92987	1.72757e-99
Kcnj8	ENSRNOG00000013463	-5.22424	1.77618e-99
Vegfc	ENSRNOG00000011416	2.52824	4.02438e-99
Lyz2	ENSRNOG00000005825	-8.78551	6.02357e-99
Angptl1	ENSRNOG00000004712	-6.48563	9.5383e-99
Prc1	ENSRNOG00000013057	4.15801	2.10976e-98
Slc6a7	ENSRNOG00000018644	-8.36999	2.61704e-98
Mtus1	ENSRNOG00000010748	-1.8378	4.62074e-98
Dcxr	ENSRNOG00000050315	-3.77375	8.33751e-98
Rn50_8_0651.1	ENSRNOG00000051285	-8.23037	2.42582e-97
Gpr176	ENSRNOG00000005971	3.31367	2.84823e-97
Hgf	ENSRNOG00000007027	-3.65438	3.86741e-97
Ppp1r15a	ENSRNOG00000020938	-3.13982	1.24584e-96
Sik1	ENSRNOG00000001189	-3.99594	2.33835e-96
Serpine2	ENSRNOG00000015461	-4.5889	3.84878e-96
Pkp1	ENSRNOG00000010076	9.49908	4.10048e-96
Steap3	ENSRNOG00000049471	-2.52732	5.72753e-96
Klf9	ENSRNOG00000014215	-2.36465	7.14146e-96
Acss1	ENSRNOG00000007102	-5.99232	9.43704e-96
Clu	ENSRNOG00000016460	-3.48269	3.36286e-95
Tmem119	ENSRNOG00000000700	5.29422	9.26307e-95
Bace2	ENSRNOG00000001953	-5.15719	1.11771e-94
Mitf	ENSRNOG00000008658	-3.44821	1.7313e-94
Greb1l	ENSRNOG00000023492	-3.13491	3.84829e-94
Cyth3	ENSRNOG00000001065	-1.89976	1.23705e-93
Bmp4	ENSRNOG00000009694	3.33258	1.90776e-93
Mki67	ENSRNOG00000028137	4.91272	2.00272e-93
Rrm2	ENSRNOG00000054286	6.49001	4.47599e-93
Zfp36	ENSRNOG00000058388	-4.25892	5.02162e-93
NEWGENE_620381	ENSRNOG00000049743	-2.70027	9.42886e-93
Ftl1	ENSRNOG00000031506	3.00103	1.13485e-92
Slc29a1	ENSRNOG00000019752	-2.72239	5.12355e-92
Per1	ENSRNOG00000007387	-2.69858	7.05842e-92
Kmt2c	ENSRNOG00000061080	-2.19818	1.84296e-91
Diaph3	ENSRNOG00000008986	3.44625	2.02882e-91
Ogn	ENSRNOG00000047786	-3.45039	4.80018e-91
Rasgrp3	ENSRNOG00000032703	4.52301	1.08713e-90
Errfi1	ENSRNOG00000058186	-5.12032	3.16195e-90
Piezo1	ENSRNOG00000056786	4.16595	3.40922e-90
Sult1a1	ENSRNOG00000019342	-6.62635	4.25665e-90
Sphkap	ENSRNOG00000016388	-7.82252	1.15958e-89
Igsf10	ENSRNOG00000013917	-5.65501	1.25729e-89
Pmvk	ENSRNOG00000020696	-2.27885	2.64882e-89
Kcnma1	ENSRNOG00000005985	-10.0135	2.70882e-89
Endod1	ENSRNOG00000024757	-2.70529	3.19111e-89
Bcl6	ENSRNOG00000001843	-2.73331	4.45506e-88
Tstd3	ENSRNOG00000028185	3.31072	7.50686e-88
Slmap	ENSRNOG00000011307	-2.49246	1.28316e-87
Cenpf	ENSRNOG00000003388	4.80434	1.44605e-87
Hspa2	ENSRNOG00000006472	-2.60846	1.55083e-87
Pum3	ENSRNOG00000012574	1.75561	5.4958e-87
Mfsd1	ENSRNOG00000013790	1.97765	9.54619e-87
Ptgs2	ENSRNOG00000002525	-3.50169	9.58699e-87
Myo5a	ENSRNOG00000058866	2.04631	3.93694e-86
Rev3l	ENSRNOG00000000593	-1.77475	5.12979e-86
Ckap2	ENSRNOG00000024650	4.69961	5.18623e-86
Slc2a3	ENSRNOG00000008376	3.69912	6.68328e-86
Des	ENSRNOG00000019810	-9.72467	7.27388e-86
Ccnb1	ENSRNOG00000058539	5.38646	1.16109e-85
LOC103689954	ENSRNOG00000046546	-6.22544	3.40156e-85
Acsl5	ENSRNOG00000016265	2.03401	3.49609e-85
Tpx2	ENSRNOG00000008165	4.23316	7.84053e-85
Myof	ENSRNOG00000016117	1.97017	1.07979e-84
Aen	ENSRNOG00000018421	2.29849	1.07979e-84
Pmp22	ENSRNOG00000003338	-2.14702	1.82076e-84
Casq1	ENSRNOG00000006930	-4.05046	1.83427e-84
Nt5dc2	ENSRNOG00000018358	3.58063	2.5544e-84
Acadm	ENSRNOG00000009845	-2.11621	2.86378e-84
Lrch1	ENSRNOG00000009412	-2.02182	4.44099e-84
Kif23	ENSRNOG00000014080	4.96181	7.28736e-84
Mt-nd4	ENSRNOG00000029707	-4.06066	9.41803e-84
Mylip	ENSRNOG00000017579	-3.50111	1.67296e-83
Olfml2a	ENSRNOG00000014034	-4.56899	2.64406e-83
Phkb	ENSRNOG00000024101	-1.76028	7.09174e-83
Itga8	ENSRNOG00000016538	-4.73841	2.83124e-82
Klhl24	ENSRNOG00000033372	-2.30809	4.04929e-82
Sars	ENSRNOG00000020255	1.84783	4.30796e-82
Dapk2	ENSRNOG00000017332	-6.77452	4.6716e-82
Kif20a	ENSRNOG00000024428	4.84882	6.53805e-82
Sesn1	ENSRNOG00000000302	-2.13588	7.49982e-82
Cdk1	ENSRNOG00000000632	5.17713	1.04322e-81
LOC102552640	ENSRNOG00000021183	-2.91725	1.25033e-81
Cdc20	ENSRNOG00000028415	4.64183	1.27364e-81
Amotl2	ENSRNOG00000008487	2.9073	1.36838e-81
Aspm	ENSRNOG00000012318	4.07933	1.62969e-81
Cadm4	ENSRNOG00000024243	10.0177	2.40104e-81
LOC500300	ENSRNOG00000023465	5.97308	9.11249e-81
Il1rl1	ENSRNOG00000014835	10.2988	1.00252e-80
Cp	ENSRNOG00000011913	-3.70522	1.01721e-80
Tmbim1	ENSRNOG00000014797	-1.79613	1.96488e-80
Nr4a1	ENSRNOG00000007607	-4.37145	2.5693e-80
Basp1	ENSRNOG00000046313	6.17441	2.95718e-80
Asph	ENSRNOG00000007445	-2.25621	4.06073e-80
Pygm	ENSRNOG00000021090	-7.68586	8.02934e-80
P2rx1	ENSRNOG00000017606	-10.1271	1.00112e-79
Vezf1	ENSRNOG00000009819	-1.74919	1.16819e-79
Tns3	ENSRNOG00000025695	2.44194	1.80879e-79
Lrrtm3	ENSRNOG00000026466	-5.18028	1.81241e-79
Foxo3	ENSRNOG00000000299	-2.38862	2.70421e-79
Svil	ENSRNOG00000018110	-3.42144	4.32643e-79
Ccnd1	ENSRNOG00000020918	5.29284	5.78884e-79
Jdp2	ENSRNOG00000008224	2.30947	9.36276e-79
Tuba1b	ENSRNOG00000053468	2.28507	1.82754e-78
Fgl2	ENSRNOG00000012881	-9.46581	3.58263e-78
Ccng1	ENSRNOG00000003256	1.92442	7.81642e-78
Mt-atp6	ENSRNOG00000031979	-2.67278	9.15586e-78
Ppp1r12a	ENSRNOG00000004925	-2.02313	1.02243e-77
Tnfaip3	ENSRNOG00000049517	-4.28882	1.56478e-77
Rasd1	ENSRNOG00000003348	-6.61974	1.71887e-77
Thy1	ENSRNOG00000006604	6.36094	2.0681e-77
Sptbn1	ENSRNOG00000005434	1.38364	2.59555e-77
Prex1	ENSRNOG00000006952	-6.54299	4.50301e-77
Cacna2d1	ENSRNOG00000033531	-2.79014	1.89135e-76
Zranb1	ENSRNOG00000017294	-2.23503	2.92043e-76
Parvb	ENSRNOG00000055305	4.97119	3.23733e-76
Col4a3	ENSRNOG00000015365	-5.40002	5.27368e-76
Tmx4	ENSRNOG00000024852	-2.56958	7.26174e-76
Ncald	ENSRNOG00000042978	-2.97208	9.89482e-76
RGD1564664	ENSRNOG00000055564	-5.06475	1.32308e-75
Npepo	ENSRNOG00000017505	-2.27384	3.06437e-75
Top2a	ENSRNOG00000053047	4.89942	4.98457e-75
Fam212b	ENSRNOG00000015691	-5.58113	8.35224e-75
Tpm4	ENSRNOG00000015496	1.60602	2.25169e-74
Tspan18	ENSRNOG00000008758	6.64819	2.55222e-74
Aebp1	ENSRNOG00000013720	-3.28502	5.41914e-74
Plcb1	ENSRNOG00000004810	-7.87047	5.78049e-74
Fam65b	ENSRNOG00000018804	-4.89284	6.05531e-74
Zeb1	ENSRNOG00000017863	-2.0776	1.03814e-73
Agrn	ENSRNOG00000020205	-1.93795	1.14845e-73
Cacnb2	ENSRNOG00000018378	-3.96211	1.18001e-73
Nuak1	ENSRNOG00000008061	2.23336	3.12285e-73
Egln3	ENSRNOG00000005053	-4.78382	4.77635e-73
Ldlrad3	ENSRNOG00000058157	-4.22635	7.19812e-73
Tgfbr3	ENSRNOG00000002093	-3.54637	1.00489e-72
Lipa	ENSRNOG00000019077	1.97759	1.42584e-72
Nr4a2	ENSRNOG00000005600	-3.62395	2.33408e-72
Sqrdl	ENSRNOG00000000172	1.9478	5.67673e-72
Atp1a2	ENSRNOG00000007290	-9.80888	6.51853e-72
Acat2	ENSRNOG00000019189	2.94669	9.17475e-72
Plxnb1	ENSRNOG00000029510	-2.91861	1.0528e-71
Cd59	ENSRNOG00000042821	-3.41582	1.48727e-71
Ptbp2	ENSRNOG00000010827	-2.22797	2.06801e-71
Gas2l3	ENSRNOG00000025198	4.69091	2.81648e-71
Cntn2	ENSRNOG00000009033	-5.59708	4.93756e-71
Prex2	ENSRNOG00000005391	-5.02073	9.09044e-71
AABR07011951.1	ENSRNOG00000034093	-1.5906	1.3635e-70
Ltbp1	ENSRNOG00000033090	-2.54733	1.39349e-70
Ptgr1	ENSRNOG00000015072	7.65654	1.42237e-70
Enpp2	ENSRNOG00000004089	-9.38842	1.43468e-70
Mllt6	ENSRNOG00000053285	-1.96386	1.43468e-70
Kif22	ENSRNOG00000020281	4.85579	1.86469e-70
P4ha3	ENSRNOG00000017118	6.81816	2.0009e-70
Tspan2	ENSRNOG00000023338	-4.12539	2.4275e-70
Clmn	ENSRNOG00000011044	-5.12131	2.97146e-70
Rsbn1	ENSRNOG00000019671	-2.14358	4.95655e-70
Socs2	ENSRNOG00000008965	-4.90525	5.9574e-70
Rcan1	ENSRNOG00000001979	-3.65211	6.12513e-70
Zc3h12a	ENSRNOG00000009131	-2.78321	1.24091e-69
Kif11	ENSRNOG00000056069	4.40549	1.48297e-69
Anln	ENSRNOG00000014343	3.73539	1.55491e-69
Dgki	ENSRNOG00000026705	-6.10282	1.65349e-69
Aacs	ENSRNOG00000000967	2.0913	2.19985e-69
Fbxl22	ENSRNOG00000017684	-5.2725	2.25188e-69
Oxct1	ENSRNOG00000043094	-2.06259	4.81212e-69
Mtfr1l	ENSRNOG00000016937	-1.20814	5.54449e-69
Epb41l1	ENSRNOG00000057817	-2.69794	5.75395e-69
Rn50_8_0647.2	ENSRNOG00000051221	-8.326	6.08697e-69
Capg	ENSRNOG00000013668	5.25095	6.25179e-69
Tmem120a	ENSRNOG00000001441	1.9653	6.9517e-69
Nr4a3	ENSRNOG00000005964	-5.89184	8.04776e-69
Abtb2	ENSRNOG00000008510	-2.90288	8.52897e-69
Pcsk1	ENSRNOG00000011107	-8.06968	8.8751e-69
Uhrf1	ENSRNOG00000048411	5.70147	1.73572e-68
Ranbp17	ENSRNOG00000005042	-2.69619	3.19992e-68
Tpd52l1	ENSRNOG00000021478	-6.46203	3.91456e-68
Loxl2	ENSRNOG00000016758	4.57938	4.42937e-68
Dlgap5	ENSRNOG00000010721	4.3798	5.53601e-68
Lrrc75b	ENSRNOG00000046428	2.32327	6.29368e-68
Dnajb11	ENSRNOG00000001803	1.25056	7.30567e-68
Filip1	ENSRNOG00000011521	-4.48836	1.3902e-67
Tmem86a	ENSRNOG00000013663	-5.24038	1.46004e-67
LOC680121	ENSRNOG00000009920	-1.59937	2.43405e-67
Racgap1	ENSRNOG00000049033	4.7609	2.5289e-67
Cmtm7	ENSRNOG00000010986	3.6677	3.36614e-67
Mt-cyb	ENSRNOG00000031766	-3.43872	3.6662e-67
Nras	ENSRNOG00000023079	1.55509	5.25401e-67
Cd44	ENSRNOG00000006094	3.26247	9.18531e-67
Mt-nd2	ENSRNOG00000031033	-3.64451	9.57486e-67
Ahr	ENSRNOG00000004342	6.94448	1.14874e-66
Ghitm	ENSRNOG00000013961	1.33152	1.33428e-66
Dmd	ENSRNOG00000046366	-3.65312	2.39856e-66
Slc7a11	ENSRNOG00000010210	8.14765	3.48052e-66
Ppp1ca	ENSRNOG00000018708	1.31662	4.98882e-66
Ace	ENSRNOG00000062101	-6.93632	5.19252e-66
Sacs	ENSRNOG00000014509	-2.74845	7.01964e-66
Anxa2	ENSRNOG00000010362	2.06934	7.85659e-66
Ppp1cb	ENSRNOG00000004612	-1.68273	8.02694e-66
Atp11a	ENSRNOG00000017154	1.44612	8.18803e-66
Pir	ENSRNOG00000003674	4.56698	1.14275e-65
Abca8	ENSRNOG00000004040	-3.2194	1.70749e-65
Rnf19a	ENSRNOG00000009658	-1.44413	2.28799e-65
Nek6	ENSRNOG00000010897	3.72544	2.43565e-65
Sgms2	ENSRNOG00000011284	3.16078	3.6979e-65
Ubn2	ENSRNOG00000005564	-2.12569	3.74952e-65
Ralgapa1	ENSRNOG00000046256	-2.2942	6.20962e-65
Col5a2	ENSRNOG00000003736	1.99996	7.92183e-65
Tet1	ENSRNOG00000000277	-4.5748	1.03847e-64
Vsnl1	ENSRNOG00000005345	6.39474	1.38412e-64
Abcc9	ENSRNOG00000036960	-3.50784	2.14584e-64
Abhd2	ENSRNOG00000017120	1.61766	2.30776e-64
LOC303140	ENSRNOG00000008432	-2.48564	2.35471e-64
RGD1311756	ENSRNOG00000004442	3.06309	2.38639e-64
Ldlrad4	ENSRNOG00000016879	-2.31979	2.40324e-64
Fbxo32	ENSRNOG00000006738	-3.79383	2.41834e-64
Sfxn1	ENSRNOG00000018279	2.219	2.6287e-64
Abca2	ENSRNOG00000014268	-3.07644	2.9286e-64
Sox6	ENSRNOG00000020514	-4.62318	3.37875e-64
Sgk1	ENSRNOG00000011815	-3.43352	3.5983e-64
Fam111a	ENSRNOG00000012067	5.72814	3.83801e-64
Dnajb1	ENSRNOG00000021824	-1.69837	4.83752e-64
AABR07006724.1	ENSRNOG00000053728	-3.16621	4.99567e-64
Cdc14a	ENSRNOG00000014515	-3.52725	5.32626e-64
Tgfb2	ENSRNOG00000002418	3.27193	5.5784e-64
Scube1	ENSRNOG00000010617	-9.50023	5.70663e-64
Ppp1r3d	ENSRNOG00000053869	-2.21337	5.85142e-64
Snai2	ENSRNOG00000047699	5.05836	6.27008e-64
Nrap	ENSRNOG00000016714	-7.17635	7.96757e-64
Nqo1	ENSRNOG00000012772	5.41135	8.00387e-64
Pcf11	ENSRNOG00000009891	-2.10664	8.67231e-64
Tpst2	ENSRNOG00000000664	2.01955	9.72348e-64
Shmt2	ENSRNOG00000008106	2.46123	1.28249e-63
Psph	ENSRNOG00000000925	3.41796	1.86571e-63
Htatip2	ENSRNOG00000022189	6.61028	1.94727e-63
Sema7a	ENSRNOG00000007687	-4.02783	2.1738e-63
LOC361346	ENSRNOG00000028677	2.52736	2.1738e-63
Ect2	ENSRNOG00000024365	4.95705	3.24882e-63
Fads6	ENSRNOG00000021380	-6.57945	3.49677e-63
Hm13	ENSRNOG00000007738	1.49096	4.79058e-63
Sbspon	ENSRNOG00000007258	-8.59203	4.81157e-63
Pcolce	ENSRNOG00000025001	4.75191	6.24811e-63
Chrdl1	ENSRNOG00000004330	-7.41157	7.19808e-63
Crem	ENSRNOG00000014900	-2.14612	7.88849e-63
Fgf1	ENSRNOG00000013867	-3.758	8.01698e-63
Atf5	ENSRNOG00000020060	2.07424	8.53122e-63
Ncapg	ENSRNOG00000038572	5.34421	1.9076e-62
Heca	ENSRNOG00000060972	-1.78166	2.02966e-62
Bcat1	ENSRNOG00000015514	3.20514	2.62279e-62
Nradd	ENSRNOG00000020936	2.82469	2.75626e-62
Cers5	ENSRNOG00000052990	1.44148	3.0855e-62
Tob1	ENSRNOG00000002828	-2.76852	3.8233e-62
Xirp1	ENSRNOG00000037085	-9.59598	4.56757e-62
Rnf145	ENSRNOG00000004602	1.67404	5.57654e-62
Pvt1	ENSRNOG00000062170	5.61503	6.5302e-62
Mical3	ENSRNOG00000053203	-2.79723	6.95871e-62
Ccna2	ENSRNOG00000015423	4.70884	7.81535e-62
Dusp10	ENSRNOG00000004003	-2.30556	1.27159e-61
Cped1	ENSRNOG00000021840	-5.17924	1.93355e-61
Zfp385d	ENSRNOG00000014661	-5.49858	1.93362e-61
Col8a1	ENSRNOG00000039668	3.7126	2.16382e-61
Sik2	ENSRNOG00000043498	-2.03613	2.42108e-61
Ryk	ENSRNOG00000008593	1.12857	2.46997e-61
LOC100909712	ENSRNOG00000011586	-2.51778	3.12019e-61
Bmpr1a	ENSRNOG00000052469	-1.998	3.45542e-61
Hexim1	ENSRNOG00000003203	-2.14694	3.52056e-61
Pdk4	ENSRNOG00000009565	-4.29387	4.14483e-61
Eno1	ENSRNOG00000017895	2.52639	5.846e-61
LOC100910483	ENSRNOG00000048545	-4.74179	7.86915e-61
Nbas	ENSRNOG00000024503	2.2322	1.0431e-60
Gars	ENSRNOG00000011052	2.24433	1.14241e-60
RGD1309104	ENSRNOG00000028236	2.53167	1.26597e-60
Fam132a	ENSRNOG00000019864	-5.31451	1.32605e-60
Cdca8	ENSRNOG00000031431	4.1102	1.36207e-60
Kcnb1	ENSRNOG00000046949	-5.69973	1.6132e-60
Dstyk	ENSRNOG00000021298	-1.49402	1.92046e-60
Rbpms2	ENSRNOG00000015896	-4.11871	2.10455e-60
Sclt1	ENSRNOG00000014139	-1.87246	4.22654e-60
Stmn1	ENSRNOG00000016810	3.89212	4.23178e-60
Shroom3	ENSRNOG00000002208	-4.37673	5.97374e-60
Pnrc1	ENSRNOG00000007793	-2.58078	8.43919e-60
Nrxn1	ENSRNOG00000050220	-5.35094	9.05017e-60
Cdk6	ENSRNOG00000009258	3.82603	9.30156e-60
Galnt10	ENSRNOG00000002488	3.51545	1.1954e-59
Hmmr	ENSRNOG00000059894	4.06343	1.57258e-59
Klhdc8b	ENSRNOG00000047867	-2.49146	1.61917e-59
Anlnl1	ENSRNOG00000018113	3.5656	1.6891e-59
Fbln7	ENSRNOG00000017550	-4.88168	2.05436e-59
Jag1	ENSRNOG00000007443	2.42005	2.71311e-59
Hspb1	ENSRNOG00000023546	-3.69146	3.34739e-59
Col5a3	ENSRNOG00000020525	4.92083	3.37644e-59
Ppp1r12b	ENSRNOG00000051440	-4.15392	3.42792e-59
Ltbp4	ENSRNOG00000020871	-5.02896	6.90905e-59
Tacc3	ENSRNOG00000017259	4.64572	7.10114e-59
Gabarapl1	ENSRNOG00000053362	-1.54842	9.77363e-59
Pfkm	ENSRNOG00000057988	-1.61358	1.02947e-58
Sgo2	ENSRNOG00000027035	4.31148	1.10412e-58
Ttk	ENSRNOG00000029055	5.56182	1.12539e-58
Net1	ENSRNOG00000017765	-5.17002	1.62996e-58
Vstm4	ENSRNOG00000020078	-3.8741	1.94099e-58
Mt-nd3	ENSRNOG00000033615	-2.1493	1.98524e-58
Actg1	ENSRNOG00000053452	1.52845	2.24749e-58
Chchd6	ENSRNOG00000060248	3.72642	2.32286e-58
Cep55	ENSRNOG00000016377	5.42318	3.02102e-58
Mastl	ENSRNOG00000054474	4.25757	3.06542e-58
Kank1	ENSRNOG00000016023	-3.37127	3.15888e-58
Uggt1	ENSRNOG00000014901	1.67141	3.71647e-58
Slfn4	ENSRNOG00000057092	7.85711	4.02992e-58
Trib3	ENSRNOG00000007319	5.59479	4.42624e-58
Fam64a	ENSRNOG00000008040	4.22983	5.09353e-58
Tnfaip2	ENSRNOG00000010165	4.97683	5.11652e-58
Sumf2	ENSRNOG00000000922	2.65281	5.29701e-58
Tppp	ENSRNOG00000028261	-6.89785	5.60515e-58
LOC100360087	ENSRNOG00000020843	2.89319	5.69881e-58
Rasa3	ENSRNOG00000017671	2.79411	6.12148e-58
Pknox2	ENSRNOG00000028856	-5.57868	6.17074e-58
Pbxip1	ENSRNOG00000020673	-2.66758	6.51471e-58
Gdf6	ENSRNOG00000007810	6.05059	9.11834e-58
Irs2	ENSRNOG00000023509	-2.48263	9.78609e-58
Mpp6	ENSRNOG00000021579	2.88799	1.83367e-57
Adgra2	ENSRNOG00000012991	2.3319	1.84106e-57
Met	ENSRNOG00000052745	7.29768	1.89554e-57
Sun2	ENSRNOG00000015177	-1.73432	2.15605e-57
Macrod1	ENSRNOG00000021174	-4.02615	2.72901e-57
Tnc	ENSRNOG00000058645	4.75616	4.65271e-57
Tead2	ENSRNOG00000020695	4.63993	5.05854e-57
Pde4b	ENSRNOG00000005905	-2.4985	6.53504e-57
Ttll12	ENSRNOG00000022623	3.11997	6.53504e-57
Ncaph	ENSRNOG00000012051	5.159	8.11509e-57
Rin1	ENSRNOG00000050223	3.19285	8.79566e-57
Nrp1	ENSRNOG00000010744	2.72001	1.11298e-56
Adgrg6	ENSRNOG00000011411	3.95075	1.54437e-56
Plk1	ENSRNOG00000018815	5.63734	1.68158e-56
Mob2	ENSRNOG00000020044	-2.40678	1.9209e-56
Cdkl5	ENSRNOG00000003742	-3.46338	2.19552e-56
Tbrg1	ENSRNOG00000023850	1.18187	2.255e-56
Mcm3	ENSRNOG00000012543	4.33659	3.16788e-56
Nhsl1	ENSRNOG00000060603	5.67522	3.85449e-56
Dctd	ENSRNOG00000013215	4.36052	4.87203e-56
Cnnm2	ENSRNOG00000020113	-3.57813	5.30067e-56
Aif1l	ENSRNOG00000009951	4.53742	5.62652e-56
Kpna2	ENSRNOG00000015329	2.33936	6.17029e-56
Abcd4	ENSRNOG00000011964	2.63403	7.10442e-56
Erg	ENSRNOG00000001652	-4.25862	7.69954e-56
Fam71a	ENSRNOG00000029371	-9.01811	7.97395e-56
Tk1	ENSRNOG00000047314	4.59241	8.66631e-56
Itpr3	ENSRNOG00000052795	4.42214	8.95652e-56
Knl1	ENSRNOG00000060100	4.18158	1.04509e-55
Pim1	ENSRNOG00000000529	-2.91895	1.2983e-55
Kdm6b	ENSRNOG00000037613	-3.75258	1.34657e-55
Thra	ENSRNOG00000009066	-3.16907	1.46616e-55
Ndc80	ENSRNOG00000013727	4.39466	1.65311e-55
Cttnbp2	ENSRNOG00000061845	-3.71892	1.94899e-55
Aurkb	ENSRNOG00000005659	4.74407	2.04276e-55
Rock1	ENSRNOG00000031092	-2.24703	2.28012e-55
Ago3	ENSRNOG00000034269	-1.7147	2.46712e-55
Wwp2	ENSRNOG00000012937	-2.00186	2.70211e-55
Itga6	ENSRNOG00000001518	3.55938	3.08256e-55
Alpk3	ENSRNOG00000011659	-7.75576	3.09835e-55
Nars	ENSRNOG00000017852	1.63091	3.68175e-55
Tspan4	ENSRNOG00000029810	2.13319	5.30141e-55
Bub1b	ENSRNOG00000007906	4.81036	5.49779e-55
Itm2b	ENSRNOG00000016271	-1.74442	5.78469e-55
LOC100361457	ENSRNOG00000036701	1.53826	5.90207e-55
Antxr2	ENSRNOG00000000081	1.71678	8.37872e-55
Mthfd1l	ENSRNOG00000019582	4.01293	8.59879e-55
Rhobtb2	ENSRNOG00000017373	-1.9017	1.07981e-54
Sertad1	ENSRNOG00000024363	-1.88291	1.19593e-54
Pabpc4	ENSRNOG00000015642	1.83694	1.24933e-54
Cdh3	ENSRNOG00000020129	4.87108	1.5948e-54
Npr3	ENSRNOG00000019184	5.68715	1.71432e-54
Adam12	ENSRNOG00000018384	9.53356	2.20474e-54
Rin2	ENSRNOG00000010131	-2.60379	2.26806e-54
Eda2r	ENSRNOG00000013018	4.2263	2.46723e-54
Ano1	ENSRNOG00000020865	-3.63382	2.73242e-54
Mettl24	ENSRNOG00000024221	-6.36763	2.99699e-54
Rai14	ENSRNOG00000028872	3.64627	3.80975e-54
Lepr	ENSRNOG00000023664	-4.26121	4.37972e-54
Espl1	ENSRNOG00000012835	4.53142	4.38492e-54
Fmo3	ENSRNOG00000003620	-10.1256	4.81301e-54
Ambra1	ENSRNOG00000017422	-1.72398	5.09918e-54
Tmem181	ENSRNOG00000018158	1.67341	5.64343e-54
Abcc4	ENSRNOG00000010064	3.87324	6.11231e-54
Mcm5	ENSRNOG00000014336	4.34554	8.98499e-54
Cyb561	ENSRNOG00000007433	-5.55373	1.25881e-53
Tcp11l2	ENSRNOG00000007587	-2.72723	1.27633e-53
Spag5	ENSRNOG00000011777	5.23773	1.30437e-53
Glb1	ENSRNOG00000010196	1.72919	1.48526e-53
Knstrn	ENSRNOG00000009334	4.73975	1.8603e-53
Akap13	ENSRNOG00000010964	-2.14888	2.9715e-53
Frzb	ENSRNOG00000007765	-8.72395	3.46727e-53
Klf15	ENSRNOG00000017808	-2.60031	3.74287e-53
Clec14a	ENSRNOG00000022697	-8.71209	4.48952e-53
Tifa	ENSRNOG00000010941	-2.60225	6.84291e-53
Cpeb4	ENSRNOG00000033169	-1.74863	7.29841e-53
Igsf9b	ENSRNOG00000009253	-3.80213	7.91788e-53
Hist2h3c2	ENSRNOG00000050478	4.47348	8.91622e-53
Kcns3	ENSRNOG00000004899	-5.38942	9.27082e-53
Cdca2	ENSRNOG00000025302	5.18404	9.56309e-53
Edn1	ENSRNOG00000014361	3.34592	9.70224e-53
Trpm4	ENSRNOG00000020714	-1.91013	1.03584e-52
Olfm1	ENSRNOG00000009862	-4.47216	1.06353e-52
Paqr6	ENSRNOG00000026059	-1.7454	1.06353e-52
Vldlr	ENSRNOG00000027491	1.76318	1.11664e-52
Tubb4b	ENSRNOG00000010170	2.28151	1.4979e-52
Pcp4l1	ENSRNOG00000003209	-6.8512	2.14035e-52
Pank1	ENSRNOG00000018944	-2.90178	3.69937e-52
Peg3	ENSRNOG00000014791	-3.46184	3.947e-52
Nav2	ENSRNOG00000014530	-2.39574	4.36713e-52
Csad	ENSRNOG00000011573	-2.85801	4.56665e-52
Cdk4	ENSRNOG00000025602	1.8289	4.80123e-52
Dmp1	ENSRNOG00000002167	-11.4406	5.05744e-52
Dbf4	ENSRNOG00000050482	4.49678	5.42435e-52
St3gal5	ENSRNOG00000010284	3.16526	5.70334e-52
Boc	ENSRNOG00000002041	-2.61832	6.38082e-52
Pip4k2a	ENSRNOG00000016670	1.93314	6.52229e-52
Grip2	ENSRNOG00000009726	-9.47889	6.90911e-52
Gapdh	ENSRNOG00000018630	1.33589	1.4805e-51
P2ry2	ENSRNOG00000019283	-2.98588	1.66037e-51
Ckap2l	ENSRNOG00000026143	4.84583	1.89844e-51
Ccrl2	ENSRNOG00000033234	-4.59712	2.08178e-51
Rassf4	ENSRNOG00000013526	5.1112	4.01619e-51
Klf4	ENSRNOG00000016299	-2.0017	4.27583e-51
Peli2	ENSRNOG00000012363	-6.51936	4.3773e-51
Cenpi	ENSRNOG00000033335	4.46418	4.49e-51
Dkk3	ENSRNOG00000016343	-3.10398	7.7916e-51
Nipsnap1	ENSRNOG00000008374	2.84234	7.94466e-51
Fgf13	ENSRNOG00000042753	-4.44237	1.00917e-50
Fat4	ENSRNOG00000028335	-2.16832	1.21916e-50
Tubg1	ENSRNOG00000020213	1.79611	1.28345e-50
Foxc1	ENSRNOG00000017800	-2.12963	1.35744e-50
Sdhc	ENSRNOG00000003163	-1.23287	1.46505e-50
Sv2c	ENSRNOG00000018094	-7.84625	1.58651e-50
Cfl1	ENSRNOG00000020660	1.28659	1.6532e-50
Cdca3	ENSRNOG00000015529	5.12478	1.91315e-50
Notch3	ENSRNOG00000004346	-1.97654	2.25178e-50
Rn60_1_2212.3	ENSRNOG00000062155	-2.57794	2.34102e-50
Spty2d1	ENSRNOG00000050806	-1.42196	2.34102e-50
Hist1h1d	ENSRNOG00000047459	2.44869	2.3528e-50
Bax	ENSRNOG00000020876	2.04591	2.40173e-50
Ephb6	ENSRNOG00000014367	-4.60492	2.55985e-50
Inhba	ENSRNOG00000014320	2.16412	2.63292e-50
Shcbp1	ENSRNOG00000053026	4.84277	2.63292e-50
AC108574.1	ENSRNOG00000057903	2.25003	2.65161e-50
Elmsan1	ENSRNOG00000010653	-2.21491	2.78101e-50
Adra1d	ENSRNOG00000021256	-5.04999	2.91296e-50
Lxn	ENSRNOG00000013572	2.93287	2.92595e-50
Ier5	ENSRNOG00000059406	-2.83228	2.94323e-50
Tmsbl1	ENSRNOG00000037661	5.22811	3.20089e-50
Bmf	ENSRNOG00000007529	-3.23051	3.46119e-50
Lrig2	ENSRNOG00000019957	-1.42845	4.19599e-50
Elk3	ENSRNOG00000004367	1.94288	4.36688e-50
LOC108348118	ENSRNOG00000055229	-1.61378	5.3373e-50
Arhgap11a	ENSRNOG00000008115	3.71184	6.13367e-50
Kif20b	ENSRNOG00000018929	3.81719	6.21493e-50
Nab1	ENSRNOG00000012959	-1.51529	6.39907e-50
Kif4a	ENSRNOG00000038035	4.49965	7.92753e-50
Kifc1	ENSRNOG00000000479	4.66917	8.96249e-50
St3gal6	ENSRNOG00000001653	-5.64285	1.21443e-49
Kif2c	ENSRNOG00000019100	5.16738	1.56292e-49
Tnfrsf21	ENSRNOG00000011517	-5.53461	1.64707e-49
Ccne1	ENSRNOG00000014786	3.63478	2.08212e-49
Lrrc17	ENSRNOG00000012817	-8.9217	2.24406e-49
Ptprn	ENSRNOG00000019587	7.7184	2.469e-49
Rn60_10_0621.3	ENSRNOG00000062142	-2.01618	2.67642e-49
Cables1	ENSRNOG00000012795	-2.88709	2.82954e-49
Tnfsf18	ENSRNOG00000026607	10.5681	2.88917e-49
Chac1	ENSRNOG00000014387	5.04268	3.01949e-49
Pkm	ENSRNOG00000011329	1.97481	3.98987e-49
Amigo2	ENSRNOG00000007032	-5.2527	4.40678e-49
Jmjd1c	ENSRNOG00000000648	-2.42691	5.50195e-49
Uxs1	ENSRNOG00000045605	1.88623	5.54277e-49
Cdkn3	ENSRNOG00000009785	4.41386	7.74367e-49
Pck2	ENSRNOG00000018536	1.81785	8.84377e-49
Ccnyl1	ENSRNOG00000023807	1.58576	9.4732e-49
Lsmem1	ENSRNOG00000039110	-6.39313	9.69546e-49
Mier1	ENSRNOG00000007175	-1.33429	9.8704e-49
Pkm	ENSRNOG00000047276	2.01963	1.03506e-48
Cyp51	ENSRNOG00000007234	1.84218	1.06084e-48
Cyp20a1	ENSRNOG00000017631	1.20574	1.19179e-48
Hspa8	ENSRNOG00000034066	-1.60617	1.34092e-48
Eprs	ENSRNOG00000002393	1.49201	1.55755e-48
Amigo1	ENSRNOG00000045665	-3.56914	1.68522e-48
Cd9	ENSRNOG00000019556	-2.30949	1.68787e-48
Dirc2	ENSRNOG00000002240	-1.23754	1.76615e-48
Gipc1	ENSRNOG00000003864	1.24855	2.03676e-48
Mgmt	ENSRNOG00000016038	3.66028	2.1718e-48
Cxcl12	ENSRNOG00000013589	6.87859	2.17651e-48
Tead4	ENSRNOG00000005608	2.26673	2.24887e-48
Aspa	ENSRNOG00000019659	-3.09347	2.35063e-48
Slc9b2	ENSRNOG00000023404	-3.80363	2.36227e-48
Robo2	ENSRNOG00000029598	5.81399	2.66447e-48
Plekha5	ENSRNOG00000008747	-1.53893	4.42992e-48
Lgals9	ENSRNOG00000012681	4.0803	6.24145e-48
Col4a5	ENSRNOG00000018951	-3.67663	6.41157e-48
Tex261	ENSRNOG00000013712	1.30727	7.29705e-48
Ankrd28	ENSRNOG00000019697	1.50445	7.60082e-48
Hn1l	ENSRNOG00000024661	2.14006	7.80665e-48
Hsc70-ps2	ENSRNOG00000062247	-1.56237	8.68315e-48
Klf8	ENSRNOG00000039057	-4.56524	9.21406e-48
AABR07007055.1	ENSRNOG00000061365	-5.86679	9.8566e-48
S100a4	ENSRNOG00000011821	2.86294	1.16497e-47
Entpd1	ENSRNOG00000014574	-5.20251	1.17947e-47
Cxxc4	ENSRNOG00000045764	-6.80801	1.26018e-47
Fmo2	ENSRNOG00000003510	-10.9767	1.3211e-47
Fam169b	ENSRNOG00000022822	-4.33113	1.64426e-47
Mamdc2	ENSRNOG00000024620	-9.64172	2.12331e-47
Atp2a2	ENSRNOG00000001285	-1.31903	2.28652e-47
Fgf12	ENSRNOG00000001931	-8.9421	2.61827e-47
Kif21b	ENSRNOG00000008471	3.80491	2.97578e-47
Cpeb1	ENSRNOG00000019161	3.57282	3.15014e-47
Gnao1	ENSRNOG00000019482	-4.20148	3.44821e-47
Thop1	ENSRNOG00000019924	2.1518	3.7921e-47
Ric1	ENSRNOG00000016172	-1.44976	4.3069e-47
Mga	ENSRNOG00000006378	-1.27621	4.67759e-47
Tpst1	ENSRNOG00000000900	-1.57913	5.74649e-47
Rnf103	ENSRNOG00000007272	-1.43409	6.01162e-47
Cd302	ENSRNOG00000006623	-2.08769	7.29694e-47
Plin4	ENSRNOG00000047046	-5.12036	7.4198e-47
Mybpc2	ENSRNOG00000019627	-5.73167	8.11989e-47
Commd10	ENSRNOG00000003958	1.54704	9.06939e-47
LOC684828	ENSRNOG00000048264	4.37288	9.83046e-47
Spsb1	ENSRNOG00000017212	-2.22416	1.11119e-46
Plekho1	ENSRNOG00000021170	-1.92352	1.17081e-46
Prdm5	ENSRNOG00000023679	-2.02587	1.35884e-46
Nuf2	ENSRNOG00000002711	4.3537	1.52604e-46
Phf21a	ENSRNOG00000006063	-1.59843	1.66389e-46
Sdk2	ENSRNOG00000024711	-2.31227	1.6782e-46
Ppt1	ENSRNOG00000012616	-1.07652	1.6782e-46
Tbl1x	ENSRNOG00000003686	-1.85771	1.72068e-46
Stil	ENSRNOG00000057760	4.34435	2.00393e-46
Ppm1b	ENSRNOG00000030667	-1.02107	2.12689e-46
Wars	ENSRNOG00000004359	2.2673	2.15828e-46
Ltbp3	ENSRNOG00000020813	-3.23877	3.15841e-46
Rnf130	ENSRNOG00000046330	-3.33736	3.59663e-46
Mkln1	ENSRNOG00000054514	-1.24528	3.74326e-46
Gpat4	ENSRNOG00000018077	1.17058	5.36184e-46
Pard3b	ENSRNOG00000024345	-2.00364	8.80044e-46
Plk4	ENSRNOG00000011654	3.40688	9.59374e-46
Tbc1d8	ENSRNOG00000013583	-4.27705	1.03332e-45
Mmp19	ENSRNOG00000006778	3.73629	1.04595e-45
Mcm6	ENSRNOG00000003703	3.64446	1.22154e-45
Afap1l2	ENSRNOG00000017164	3.8753	1.33642e-45
Egr3	ENSRNOG00000017828	-5.00474	1.65584e-45
RGD1562608	ENSRNOG00000029466	-2.25523	1.68554e-45
Ccnf	ENSRNOG00000007483	5.52379	2.2852e-45
Brd2	ENSRNOG00000000461	-1.60597	2.50556e-45
Tpbg	ENSRNOG00000010694	4.52954	2.52985e-45
Pxdc1	ENSRNOG00000017093	-1.56763	3.11097e-45
C1qtnf7	ENSRNOG00000005094	-4.58104	3.11689e-45
Tiparp	ENSRNOG00000011238	-1.79603	4.02152e-45
Bub1	ENSRNOG00000032778	3.67154	6.66571e-45
Nceh1	ENSRNOG00000013313	2.10677	6.87473e-45
NEWGENE_1308171	ENSRNOG00000029792	-3.75782	6.98399e-45
Sdhd	ENSRNOG00000022980	-1.52748	7.21333e-45
Pkp2	ENSRNOG00000001825	5.56444	9.14897e-45
Urgcp	ENSRNOG00000012184	-1.34061	9.8512e-45
Ccdc88a	ENSRNOG00000004057	-1.6732	1.08775e-44
LOC100909709	ENSRNOG00000054902	-2.0201	1.21175e-44
Nans	ENSRNOG00000008945	1.65403	1.25274e-44
Pmm1	ENSRNOG00000005358	1.29014	1.34079e-44
Tfeb	ENSRNOG00000014666	-1.98802	1.36395e-44
Ube2c	ENSRNOG00000015131	5.35649	1.53615e-44
Hist2h3c2	ENSRNOG00000061185	5.77614	1.97728e-44
LOC688655	ENSRNOG00000005811	-1.70322	2.04836e-44
Smarcd3	ENSRNOG00000010077	-1.43928	2.04982e-44
B3gnt2	ENSRNOG00000009267	-1.6832	2.18428e-44
Gsta4	ENSRNOG00000030449	-4.37439	2.3097e-44
Mst1r	ENSRNOG00000032618	-3.76418	2.51745e-44
Gigyf2	ENSRNOG00000023577	-1.00568	2.52545e-44
Sema6d	ENSRNOG00000004812	-5.75069	2.63736e-44
Hipk3	ENSRNOG00000011358	-1.24449	3.22368e-44
Farp1	ENSRNOG00000011203	3.69367	3.36541e-44
Melk	ENSRNOG00000013598	5.26826	3.54617e-44
Insr	ENSRNOG00000029986	-2.35298	4.89693e-44
Cgnl1	ENSRNOG00000054080	-3.79702	5.3383e-44
Galnt11	ENSRNOG00000008117	-1.53826	5.48154e-44
Noct	ENSRNOG00000010799	-3.33446	5.62973e-44
Ubc	ENSRNOG00000057823	-2.04838	5.68934e-44
Mark1	ENSRNOG00000002339	-2.9321	5.85238e-44
Ipo9	ENSRNOG00000007418	1.30327	1.04149e-43
Mafb	ENSRNOG00000016037	-7.4205	1.0602e-43
Cap2	ENSRNOG00000043350	-3.21707	1.12787e-43
Foxm1	ENSRNOG00000005936	3.33695	1.18617e-43
Nsdhl	ENSRNOG00000057814	1.90725	1.38589e-43
Kntc1	ENSRNOG00000033658	4.83814	1.42339e-43
Usp54	ENSRNOG00000027012	-2.04659	1.52037e-43
Ddx17	ENSRNOG00000051170	-1.19956	1.5542e-43
Gpnmb	ENSRNOG00000008816	3.44852	1.80096e-43
Lamb2	ENSRNOG00000047768	-2.08998	2.53329e-43
Hipk1	ENSRNOG00000019333	-1.13293	3.00754e-43
Nlgn3	ENSRNOG00000003812	-5.29794	3.02586e-43
Lmnb1	ENSRNOG00000013774	3.17447	3.05795e-43
C1r	ENSRNOG00000011796	-1.22841	3.32456e-43
Vkorc1	ENSRNOG00000050828	-1.56553	3.71983e-43
AABR07000658.1	ENSRNOG00000055111	4.50322	4.65062e-43
Gatsl3	ENSRNOG00000006740	3.55574	5.38803e-43
Acadvl	ENSRNOG00000018114	-1.07955	7.49048e-43
Gprasp1	ENSRNOG00000049985	-2.47473	8.20589e-43
Kcnh2	ENSRNOG00000009872	-5.3338	8.66164e-43
Flnb	ENSRNOG00000009470	2.84807	9.33679e-43
Gpx1	ENSRNOG00000048812	-1.92782	1.03039e-42
Mt-nd5	ENSRNOG00000029971	-2.68595	1.31387e-42
Egr1	ENSRNOG00000019422	-4.30231	1.46532e-42
Sgca	ENSRNOG00000003998	-3.47454	1.63073e-42
Chtf18	ENSRNOG00000019174	3.99399	1.7786e-42
Tmod1	ENSRNOG00000009761	-3.35597	1.95496e-42
Kif15	ENSRNOG00000060356	3.99169	1.96401e-42
Crispld2	ENSRNOG00000016752	-6.53726	2.19975e-42
Aurka	ENSRNOG00000004479	3.34822	2.23886e-42
Mdk	ENSRNOG00000017560	-6.93722	2.2783e-42
AABR07069282.1	ENSRNOG00000012119	4.39561	2.3546e-42
Pdzd2	ENSRNOG00000013140	-10.3265	2.39799e-42
Cdc25c	ENSRNOG00000024008	4.45209	2.41506e-42
Jph2	ENSRNOG00000008170	-2.47562	2.52163e-42
Dhtkd1	ENSRNOG00000023587	-2.00024	3.02827e-42
Spdl1	ENSRNOG00000007292	4.11991	3.23606e-42
Dusp8	ENSRNOG00000029394	-2.43367	3.23791e-42
Plekhh3	ENSRNOG00000020238	-1.96493	3.32559e-42
Incenp	ENSRNOG00000032929	3.58464	3.4771e-42
Litaf	ENSRNOG00000002520	2.41176	3.78286e-42
Pdp2	ENSRNOG00000012343	-1.96016	3.82326e-42
Clspn	ENSRNOG00000011332	5.82452	4.21996e-42
Sorcs2	ENSRNOG00000007033	-3.98622	4.24402e-42
LOC100364435	ENSRNOG00000042499	1.96259	4.24402e-42
Arhgap32	ENSRNOG00000008709	-1.93462	4.61911e-42
Rnf167	ENSRNOG00000003879	-2.16969	4.62089e-42
Dip2c	ENSRNOG00000015288	-1.75161	5.50111e-42
Zfp36l1	ENSRNOG00000058646	-3.16867	5.70492e-42
Acot11	ENSRNOG00000007837	-3.37227	6.74504e-42
Bag3	ENSRNOG00000020298	-2.21536	6.94183e-42
Ppp1r9a	ENSRNOG00000008869	-4.73096	6.99596e-42
Fancd2	ENSRNOG00000061085	4.31803	6.99918e-42
Mt-nd1	ENSRNOG00000030644	-3.16592	7.14412e-42
Ehd1	ENSRNOG00000043503	-1.18315	7.25663e-42
Tmem56	ENSRNOG00000025160	-3.87301	1.08987e-41
Trpm8	ENSRNOG00000019035	-9.05558	1.11871e-41
Map3k20	ENSRNOG00000001515	-1.50299	1.19021e-41
Larp1b	ENSRNOG00000038366	-1.77959	1.36761e-41
Btbd11	ENSRNOG00000005758	-4.41183	1.37049e-41
Eif5a2	ENSRNOG00000011859	-1.33676	1.43194e-41
Fry	ENSRNOG00000000894	-3.4391	1.47156e-41
Dcaf11	ENSRNOG00000018825	-1.16324	1.47156e-41
RGD1303003	ENSRNOG00000001211	-1.35439	1.48513e-41
Maff	ENSRNOG00000012886	-2.09703	1.66897e-41
Dsn1	ENSRNOG00000006236	4.09116	1.98111e-41
LOC108351137	ENSRNOG00000030963	1.35078	2.99898e-41
Vmp1	ENSRNOG00000003967	1.6829	3.25577e-41
LOC102549542	ENSRNOG00000048949	2.59617	3.83863e-41
Prdm6	ENSRNOG00000030486	-2.24274	4.87373e-41
P3h1	ENSRNOG00000053991	1.17508	5.25007e-41
Prkag2	ENSRNOG00000009085	-1.95629	5.49505e-41
Lrrfip1	ENSRNOG00000019892	-1.52111	5.57653e-41
Gadd45b	ENSRNOG00000019822	-2.65826	6.55445e-41
Prrg1	ENSRNOG00000026044	2.0099	6.79564e-41
Ripk3	ENSRNOG00000020465	2.91144	7.26952e-41
Cenpt	ENSRNOG00000024178	5.51709	7.32826e-41
Perm1	ENSRNOG00000020244	-6.8387	7.9522e-41
Clip2	ENSRNOG00000021611	1.78126	8.27781e-41
Hyal1	ENSRNOG00000015858	-3.02335	1.01356e-40
AABR07047256.1	ENSRNOG00000059459	-6.84635	1.16761e-40
Spc24	ENSRNOG00000029862	4.23433	1.20837e-40
Hps1	ENSRNOG00000045838	2.29774	1.33999e-40
Camta1	ENSRNOG00000018602	-3.02114	1.39215e-40
Il11ra1	ENSRNOG00000015068	-1.79031	1.82321e-40
Comp	ENSRNOG00000048472	-3.90598	1.84357e-40
Plpp2	ENSRNOG00000000177	3.52287	1.98756e-40
Schip1	ENSRNOG00000009276	-1.39484	2.09293e-40
Sdf2l1	ENSRNOG00000001859	3.49389	2.17509e-40
Cab39	ENSRNOG00000017297	-1.05019	2.55665e-40
Kif14	ENSRNOG00000037211	5.13355	2.73458e-40
St3gal2	ENSRNOG00000017932	-1.27442	3.33017e-40
Arc	ENSRNOG00000043465	-3.44195	3.73432e-40
Parp8	ENSRNOG00000010824	-2.72558	4.22902e-40
RGD1310335	ENSRNOG00000039183	3.99198	4.59291e-40
Acadl	ENSRNOG00000012966	-1.85896	4.59419e-40
LOC100911204	ENSRNOG00000026378	4.38954	5.16056e-40
Trim7	ENSRNOG00000002469	-3.65604	6.6623e-40
Pde3a	ENSRNOG00000025042	-3.32121	7.25423e-40
Acan	ENSRNOG00000028992	6.3705	7.5232e-40
Psen2	ENSRNOG00000002879	2.22247	8.0037e-40
Fndc5	ENSRNOG00000030238	-4.25555	8.35735e-40
Alk	ENSRNOG00000008683	7.6874	8.52026e-40
Sigmar1	ENSRNOG00000014604	1.75444	9.753e-40
Zbtb20	ENSRNOG00000056716	-1.93656	1.38681e-39
Mt-co2	ENSRNOG00000030371	-1.89787	1.39741e-39
Map1b	ENSRNOG00000017428	-2.50614	1.45663e-39
Zbtb44	ENSRNOG00000005578	-2.06553	1.83743e-39
Tgfbr1	ENSRNOG00000007036	-1.7405	2.18649e-39
Ppp1r3b	ENSRNOG00000011474	-3.39101	2.42707e-39
Sod2	ENSRNOG00000019048	-1.94065	3.27383e-39
Homer3	ENSRNOG00000020229	1.87415	3.30585e-39
Fanci	ENSRNOG00000016689	4.67288	3.41519e-39
Mdga2	ENSRNOG00000000618	-4.60998	4.00867e-39
Fam189a2	ENSRNOG00000061147	-5.57548	4.249e-39
Eif4ebp1	ENSRNOG00000012582	2.07232	4.25576e-39
Rspo3	ENSRNOG00000011568	-6.5219	4.85484e-39
LOC684762	ENSRNOG00000045644	7.21764	5.22407e-39
Nkain4	ENSRNOG00000031834	5.95881	5.29387e-39
Htra4	ENSRNOG00000061160	-6.25881	6.19873e-39
Capza1	ENSRNOG00000013538	1.13208	6.71034e-39
Plxnd1	ENSRNOG00000025209	-2.30911	7.21371e-39
Prdx5	ENSRNOG00000021125	1.49684	7.37497e-39
Tspan12	ENSRNOG00000059016	-1.69197	7.49441e-39
Ednra	ENSRNOG00000012721	-2.4696	8.53426e-39
Map4k4	ENSRNOG00000014013	1.49923	8.62539e-39
Rel	ENSRNOG00000054437	-2.58254	9.47852e-39
Nav3	ENSRNOG00000052157	6.53442	1.01432e-38
Zdhhc2	ENSRNOG00000022686	3.85226	1.06411e-38
Btn2a2	ENSRNOG00000038877	6.31193	1.07852e-38
Ehd3	ENSRNOG00000007744	1.96883	1.14412e-38
Cdc6	ENSRNOG00000027787	5.38748	1.15443e-38
Ppp2r1b	ENSRNOG00000010922	-1.72825	1.16033e-38
Slc16a7	ENSRNOG00000007839	-2.09638	1.30806e-38
Paip2	ENSRNOG00000019934	-1.01262	1.43244e-38
Rcsd1	ENSRNOG00000003283	-4.6465	1.44853e-38
Csrp1	ENSRNOG00000008937	-2.06606	1.45226e-38
Tgm2	ENSRNOG00000012956	-6.56902	1.62984e-38
Lsamp	ENSRNOG00000031852	-4.58899	1.8452e-38
Agpat2	ENSRNOG00000019466	3.50605	2.2515e-38
Fbxo11	ENSRNOG00000016396	-1.01359	2.42011e-38
Plk2	ENSRNOG00000011951	1.75136	2.42564e-38
Casp3	ENSRNOG00000010475	1.49518	2.50048e-38
Adamts8	ENSRNOG00000005574	-6.55338	3.00455e-38
Magi1	ENSRNOG00000022060	-1.30417	3.35393e-38
B4galt4	ENSRNOG00000003114	-1.79428	3.56981e-38
Usp20	ENSRNOG00000007710	-1.35035	3.69057e-38
Eif2b2	ENSRNOG00000006467	2.50648	3.74527e-38
Wdhd1	ENSRNOG00000011167	3.77433	3.80484e-38
Pip5k1b	ENSRNOG00000015232	-6.08971	4.00106e-38
Ska3	ENSRNOG00000021847	4.7721	4.64871e-38
Aida	ENSRNOG00000058805	1.10087	4.69185e-38
Epb41l4b	ENSRNOG00000056550	-4.37389	6.65813e-38
Col4a2	ENSRNOG00000023972	-1.54974	6.72828e-38
Itga3	ENSRNOG00000004276	2.67837	7.3739e-38
Chst3	ENSRNOG00000000572	-2.50709	7.41283e-38
Asnsd1	ENSRNOG00000003942	1.38983	8.79179e-38
Klhl8	ENSRNOG00000002214	-1.93696	9.0966e-38
LOC102547056	ENSRNOG00000061316	5.05721	9.60621e-38
Col27a1	ENSRNOG00000007657	-2.5953	1.0084e-37
Csf1r	ENSRNOG00000018414	-5.72695	1.05126e-37
Ccne2	ENSRNOG00000008055	3.5235	1.09326e-37
Acvr1	ENSRNOG00000005033	-2.05759	1.15878e-37
Coq10b	ENSRNOG00000014456	-1.67418	1.26373e-37
Nfat5	ENSRNOG00000011879	-1.76236	1.32775e-37
Ccdc80	ENSRNOG00000002052	3.58926	1.37028e-37
Slc1a4	ENSRNOG00000005248	1.22355	1.37413e-37
Hdgfrp3	ENSRNOG00000019740	-1.15898	1.46254e-37
Mcm2	ENSRNOG00000016316	3.19256	1.5937e-37
Piezo2	ENSRNOG00000038784	5.96306	1.7566e-37
Dab1	ENSRNOG00000007410	-6.74807	1.7804e-37
Rrm1	ENSRNOG00000045752	2.18553	1.90083e-37
Sspn	ENSRNOG00000001807	-3.28875	2.0673e-37
Pgrmc1	ENSRNOG00000012786	1.2384	2.49943e-37
Hist1h2ah	ENSRNOG00000049649	3.41924	2.68034e-37
Atp8b3	ENSRNOG00000024975	-3.32487	2.71344e-37
S1pr2	ENSRNOG00000020653	2.26929	2.72888e-37
Tgfa	ENSRNOG00000016182	8.22706	2.7552e-37
Itpk1	ENSRNOG00000008051	-2.51924	2.79849e-37
Klhl23	ENSRNOG00000007981	-1.76337	2.83159e-37
Stard9	ENSRNOG00000010050	-1.94741	2.97947e-37
Plppr4	ENSRNOG00000016872	-5.08431	3.14564e-37
Galnt1	ENSRNOG00000016207	1.26353	3.5268e-37
Mapk3	ENSRNOG00000053583	1.38173	3.5268e-37
Ranbp3l	ENSRNOG00000052173	-3.95257	3.53765e-37
Tnik	ENSRNOG00000012422	-3.02608	4.52743e-37
Aoc3	ENSRNOG00000051307	-3.7414	4.77475e-37
LOC102549173	ENSRNOG00000045646	4.52118	5.78654e-37
Cstf3	ENSRNOG00000012089	1.49284	6.72005e-37
Tmem35	ENSRNOG00000001506	-4.31664	6.96146e-37
Etfbkmt	ENSRNOG00000036918	-1.7245	7.3264e-37
Arhgef37	ENSRNOG00000025502	-4.92131	7.57932e-37
Tmod2	ENSRNOG00000010447	-3.89384	7.72789e-37
S1pr3	ENSRNOG00000014524	4.16497	8.32637e-37
Gsg2	ENSRNOG00000048660	3.30989	8.5676e-37
Synpo2l	ENSRNOG00000008949	-6.7431	8.94398e-37
Gramd4	ENSRNOG00000016968	3.32565	1.02777e-36
Zhx3	ENSRNOG00000027988	-1.69904	1.07909e-36
Mcam	ENSRNOG00000007726	-3.64226	1.34495e-36
Soga1	ENSRNOG00000053240	-1.80323	1.37886e-36
Unc5b	ENSRNOG00000000567	2.9654	1.41142e-36
Egr2	ENSRNOG00000000640	-2.85006	1.42702e-36
Rab3ip	ENSRNOG00000005362	-2.97715	1.55556e-36
Samd4a	ENSRNOG00000010489	-1.92782	1.60967e-36
Cox4i2	ENSRNOG00000007827	-4.43986	1.73423e-36
AABR07040412.1	ENSRNOG00000057826	-2.04951	1.75433e-36
Birc3	ENSRNOG00000005731	-2.6698	2.01927e-36
Shmt1	ENSRNOG00000005275	3.37889	2.3189e-36
Ctdsp1	ENSRNOG00000015295	-1.51183	2.54642e-36
Bloc1s2	ENSRNOG00000012684	2.6986	2.55515e-36
Cdkn2b	ENSRNOG00000006735	4.15813	2.6003e-36
Klhl21	ENSRNOG00000003334	-1.93119	2.66835e-36
Pla2g4a	ENSRNOG00000002657	-1.89759	2.6956e-36
Pole	ENSRNOG00000037449	3.64671	2.94767e-36
Fhl2	ENSRNOG00000016866	4.50255	3.0446e-36
Pitpnm2	ENSRNOG00000029260	-2.53735	3.47376e-36
RGD1310110	ENSRNOG00000031849	-5.1532	3.55326e-36
Npr1	ENSRNOG00000014684	-6.36873	4.26103e-36
Kdm4c	ENSRNOG00000006644	-1.14442	4.88941e-36
P3h3	ENSRNOG00000016071	-1.22154	5.07862e-36
Dtna	ENSRNOG00000016671	-3.05044	5.22187e-36
Kmt2e	ENSRNOG00000021614	-1.74333	5.44564e-36
Ndc1	ENSRNOG00000010620	1.74003	5.59919e-36
G6pd	ENSRNOG00000056728	1.23405	5.71703e-36
Mettl7a	ENSRNOG00000001376	-1.26325	5.92467e-36
Adamts2	ENSRNOG00000061484	-1.75452	6.39263e-36
Zfand5	ENSRNOG00000018107	-1.03014	6.53196e-36
Dusp2	ENSRNOG00000013862	-5.97575	6.57377e-36
Cenpa	ENSRNOG00000032178	5.80581	6.6745e-36
Klhl5	ENSRNOG00000008421	1.41037	7.79401e-36
Kansl1	ENSRNOG00000053680	-1.28173	9.31239e-36
Lars	ENSRNOG00000018304	1.22781	9.37815e-36
Alkbh5	ENSRNOG00000028341	-1.24765	1.16756e-35
Rsbn1l	ENSRNOG00000013431	-1.20123	1.27511e-35
Edem2	ENSRNOG00000019299	1.98935	1.37008e-35
Heph	ENSRNOG00000012294	-7.8299	1.39966e-35
Mtmr3	ENSRNOG00000007120	-1.21562	1.39966e-35
Gulp1	ENSRNOG00000003242	-1.9595	1.61202e-35
LOC108348081	ENSRNOG00000023841	-7.1562	1.6122e-35
Grb10	ENSRNOG00000004290	1.36455	1.6122e-35
Evc2	ENSRNOG00000007025	2.08146	1.69187e-35
Iqgap3	ENSRNOG00000027894	3.61326	1.74573e-35
Pcdh9	ENSRNOG00000038068	-5.38457	1.81429e-35
Nov	ENSRNOG00000008697	-2.50439	1.81881e-35
Bend4	ENSRNOG00000053303	-4.51316	1.86982e-35
Irak2	ENSRNOG00000021817	-2.57085	1.97026e-35
Asf1b	ENSRNOG00000005115	4.88294	2.02285e-35
Zwilch	ENSRNOG00000009303	2.81965	2.92811e-35
Brwd1	ENSRNOG00000001632	-1.44401	3.14615e-35
Reep2	ENSRNOG00000049629	-3.88954	3.45486e-35
Gxylt2	ENSRNOG00000005621	-6.48864	3.51833e-35
Arhgef10l	ENSRNOG00000050636	-1.55237	3.6715e-35
Sntb2	ENSRNOG00000020344	-1.25729	3.88621e-35
Sgo1	ENSRNOG00000022499	4.73182	4.87394e-35
Smg6	ENSRNOG00000003041	-1.17589	5.3603e-35
Dennd4a	ENSRNOG00000011739	-1.44646	5.37642e-35
Ntn1	ENSRNOG00000003947	-3.70424	5.7533e-35
Evc	ENSRNOG00000007564	1.37922	6.15036e-35
Ddx3x	ENSRNOG00000023383	-1.1315	6.41798e-35
Gsdmd	ENSRNOG00000007728	2.50641	6.92949e-35
Bcar3	ENSRNOG00000013737	-2.13326	7.42235e-35
Dock8	ENSRNOG00000015894	-3.01701	9.39484e-35
Dnmt3a	ENSRNOG00000026649	-1.57715	1.07064e-34
Il17b	ENSRNOG00000019695	-5.0692	1.07942e-34
Cmbl	ENSRNOG00000011260	-5.68946	1.29369e-34
Ercc6l	ENSRNOG00000003208	5.86912	1.56051e-34
Fn1	ENSRNOG00000014288	2.39844	1.63409e-34
RGD1561849	ENSRNOG00000021663	-2.31586	1.69284e-34
Tuft1	ENSRNOG00000020923	3.86761	1.77936e-34
Ermp1	ENSRNOG00000010915	2.00349	1.78685e-34
Birc2	ENSRNOG00000010602	-1.31542	1.85002e-34
Slc48a1	ENSRNOG00000053196	1.81164	2.0215e-34
Glb1l2	ENSRNOG00000007561	6.84275	2.04781e-34
Txnrd3	ENSRNOG00000059810	-1.53257	2.26328e-34
Lox	ENSRNOG00000014426	-1.66873	2.40154e-34
Tcf19	ENSRNOG00000058288	2.85246	2.50354e-34
Tnfsf12	ENSRNOG00000045670	-2.11	2.57542e-34
Lman1	ENSRNOG00000024470	1.11194	2.65413e-34
Rn50_13_0828.1	ENSRNOG00000049537	-1.94048	2.78434e-34
Slc6a4	ENSRNOG00000003476	-5.75224	3.03313e-34
Brca1	ENSRNOG00000020701	4.37381	3.05408e-34
Casp4	ENSRNOG00000033697	2.76379	3.09658e-34
Gsap	ENSRNOG00000028801	-2.68186	3.50151e-34
Sqle	ENSRNOG00000009550	1.87591	3.84669e-34
Pbk	ENSRNOG00000015308	3.81308	3.87083e-34
Epha2	ENSRNOG00000009222	2.69331	4.29683e-34
Foxo4	ENSRNOG00000033316	-1.65754	4.40871e-34
Hspb7	ENSRNOG00000029079	-3.8688	4.80358e-34
Lrwd1	ENSRNOG00000001429	2.11516	5.03376e-34
Bbs4	ENSRNOG00000026171	-1.35877	5.05696e-34
Rab7b	ENSRNOG00000039754	-2.53464	5.24673e-34
Emp3	ENSRNOG00000021104	1.50205	5.65466e-34
Phldb2	ENSRNOG00000002171	2.14631	5.94687e-34
Cib1	ENSRNOG00000033498	1.33475	6.12759e-34
Adamts9	ENSRNOG00000023257	-1.90548	6.509e-34
Aatk	ENSRNOG00000004392	-5.37908	6.7455e-34
Sel1l	ENSRNOG00000004464	1.14478	6.93178e-34
Myo19	ENSRNOG00000002852	1.69137	7.01212e-34
Tes	ENSRNOG00000051952	-2.46173	7.09198e-34
Rbm44	ENSRNOG00000024878	-4.91477	7.98599e-34
Ifit2	ENSRNOG00000036604	2.53747	7.99876e-34
Pkia	ENSRNOG00000012095	-2.50563	8.09291e-34
Smarcd2	ENSRNOG00000010557	1.05016	8.37815e-34
Pkdcc	ENSRNOG00000004205	-3.91493	8.4145e-34
Klf2	ENSRNOG00000014205	-1.89873	8.43041e-34
Wipf1	ENSRNOG00000018406	-1.8493	9.35322e-34
Kif26b	ENSRNOG00000028624	-4.03107	9.48087e-34
Prrg4	ENSRNOG00000022710	6.68353	1.00313e-33
Calcoco1	ENSRNOG00000015447	-1.70172	1.0587e-33
Gpcpd1	ENSRNOG00000053201	-1.56872	1.06518e-33
Tspoap1	ENSRNOG00000007957	-4.05974	1.08925e-33
Dgkd	ENSRNOG00000023238	-1.21243	1.20206e-33
Apmap	ENSRNOG00000006795	-1.27485	1.25285e-33
Dopey1	ENSRNOG00000022847	-1.21213	1.34204e-33
Map1lc3a	ENSRNOG00000025443	-1.54511	1.46577e-33
Kansl3	ENSRNOG00000015417	-1.00175	1.49307e-33
Ppargc1b	ENSRNOG00000017503	-5.84246	1.52701e-33
Shb	ENSRNOG00000011503	-2.07753	1.61252e-33
Slc25a29	ENSRNOG00000004351	-2.88593	1.70963e-33
Clk1	ENSRNOG00000025768	-2.46273	1.96232e-33
Zbtb16	ENSRNOG00000029980	-10.3529	2.06067e-33
Hist1h2ao	ENSRNOG00000048215	4.17761	2.0831e-33
Lgi2	ENSRNOG00000003887	-7.86706	2.16369e-33
Cd38	ENSRNOG00000003069	5.71271	2.26917e-33
Auts2	ENSRNOG00000000885	-4.29526	2.35175e-33
Arl4d	ENSRNOG00000020770	-2.18078	2.38105e-33
Nadk2	ENSRNOG00000054157	-2.27626	2.61507e-33
Krt18	ENSRNOG00000047393	-5.8673	2.61715e-33
Aars	ENSRNOG00000018404	1.4886	2.70011e-33
Mcm10	ENSRNOG00000017981	4.33308	2.70011e-33
Manbal	ENSRNOG00000031453	-1.03144	2.77885e-33
Ssx2ip	ENSRNOG00000015425	1.77428	3.43877e-33
Plxna4	ENSRNOG00000013072	-3.19266	3.85937e-33
Glmp	ENSRNOG00000019281	1.89484	4.27121e-33
Ccs	ENSRNOG00000047816	3.73316	4.37863e-33
Esco2	ENSRNOG00000015921	3.78649	4.73939e-33
Rad51	ENSRNOG00000037302	4.36903	4.83592e-33
Cd80	ENSRNOG00000001527	3.71215	5.28224e-33
Cdr2	ENSRNOG00000017260	-1.55482	5.70654e-33
Lrig3	ENSRNOG00000007654	-1.76543	5.78871e-33
Ptpn14	ENSRNOG00000003407	1.65133	5.94638e-33
Midn	ENSRNOG00000015434	-2.16667	6.83605e-33
Rere	ENSRNOG00000017940	-1.71337	7.00365e-33
Mfsd10	ENSRNOG00000012534	1.73036	7.52598e-33
Pmf1	ENSRNOG00000019620	3.17936	7.61115e-33
Cdr2l	ENSRNOG00000025815	1.65397	7.62824e-33
Dact3	ENSRNOG00000052256	-2.2924	7.77794e-33
Pola2	ENSRNOG00000020906	3.408	8.24202e-33
Ubl3	ENSRNOG00000000921	-1.23952	8.47185e-33
Rtn4r	ENSRNOG00000030920	-5.09549	8.7961e-33
Creb5	ENSRNOG00000008622	-2.6847	1.06726e-32
Vegfd	ENSRNOG00000003587	8.60375	1.31693e-32
LOC102548682	ENSRNOG00000028975	4.69456	1.35958e-32
Hist2h3c2	ENSRNOG00000053081	4.69456	1.35958e-32
Ubash3b	ENSRNOG00000008187	4.55133	1.40127e-32
Tob2	ENSRNOG00000050500	-2.07484	1.45049e-32
Erbb4	ENSRNOG00000014248	-5.0762	1.53079e-32
Rn50_X_0729.6	ENSRNOG00000045779	2.30543	1.74214e-32
Gmps	ENSRNOG00000051151	1.01682	1.89597e-32
Tll1	ENSRNOG00000033528	8.66864	1.89597e-32
Pcdh1	ENSRNOG00000060410	4.00179	2.47267e-32
Zfp521	ENSRNOG00000016874	5.34791	2.87402e-32
Azin1	ENSRNOG00000005333	-1.33414	2.88882e-32
Tmem151a	ENSRNOG00000049951	3.57756	2.94026e-32
Rimklb	ENSRNOG00000023814	-8.82909	2.98222e-32
Pnp	ENSRNOG00000009982	-1.17665	2.98408e-32
Nadsyn1	ENSRNOG00000020736	2.29659	3.30513e-32
RT1-N3	ENSRNOG00000000795	4.07895	3.60937e-32
Syt11	ENSRNOG00000020279	-1.88153	3.97627e-32
Pltp	ENSRNOG00000016488	3.06417	4.38772e-32
Pde5a	ENSRNOG00000014443	-3.49127	4.85922e-32
Amot	ENSRNOG00000007345	2.84281	4.85922e-32
Slc38a3	ENSRNOG00000016827	-5.47129	5.27811e-32
Slc6a17	ENSRNOG00000050090	-6.17376	5.3751e-32
Cln6	ENSRNOG00000007164	1.91001	5.92423e-32
Parpbp	ENSRNOG00000004682	6.04567	6.53888e-32
Cdc42bpg	ENSRNOG00000027456	-1.39278	6.7542e-32
Popdc2	ENSRNOG00000058752	-4.2387	7.6032e-32
Mtfr1	ENSRNOG00000021359	1.99386	7.86583e-32
Timeless	ENSRNOG00000031916	3.5298	8.86183e-32
Rbm4	ENSRNOG00000050741	-1.17426	9.21565e-32
Dedd2	ENSRNOG00000046112	-2.0832	1.00158e-31
Nkd1	ENSRNOG00000014293	-4.1705	1.23708e-31
Ppp1r3c	ENSRNOG00000018494	-2.56846	1.31042e-31
Tmed10	ENSRNOG00000007901	1.14746	1.47153e-31
Eif4a2	ENSRNOG00000001815	-1.29642	1.6124e-31
Atad2b	ENSRNOG00000058973	-1.05824	1.67491e-31
Il13ra1	ENSRNOG00000001713	-1.8225	1.68149e-31
Mynn	ENSRNOG00000027923	-1.78473	1.74563e-31
Smpdl3a	ENSRNOG00000000815	-3.33807	1.84676e-31
Epb41l3	ENSRNOG00000016724	7.40511	2.03597e-31
Trdn	ENSRNOG00000012609	-8.14802	2.04285e-31
Scd	ENSRNOG00000013552	4.78088	2.50328e-31
Myo6	ENSRNOG00000011852	1.46389	2.5415e-31
Glipr2	ENSRNOG00000014838	3.16951	2.56536e-31
Tgfbi	ENSRNOG00000012216	-3.32448	2.78123e-31
Svip	ENSRNOG00000037137	-4.40046	2.82061e-31
Sgcd	ENSRNOG00000002372	-3.01855	3.0483e-31
Hacd4	ENSRNOG00000005772	3.35527	3.26678e-31
Mtap	ENSRNOG00000006615	1.67942	3.30685e-31
Lifr	ENSRNOG00000011696	-2.55297	3.55372e-31
LOC688459	ENSRNOG00000048967	7.20581	4.91631e-31
Ggt5	ENSRNOG00000062276	-4.19282	5.1928e-31
SCARNA2	ENSRNOG00000051850	-1.60533	5.46082e-31
Erp29	ENSRNOG00000001348	1.41937	5.97906e-31
Wscd2	ENSRNOG00000053045	-5.33829	6.12474e-31
Alpl	ENSRNOG00000013954	-5.80178	6.3311e-31
Ptgis	ENSRNOG00000008245	-3.89208	6.95533e-31
Spop	ENSRNOG00000004686	-1.04981	7.25139e-31
Nagk	ENSRNOG00000013911	1.52983	7.50186e-31
Rac3	ENSRNOG00000048172	-3.52248	7.61605e-31
Il17ra	ENSRNOG00000011153	1.62714	8.16853e-31
Ccni	ENSRNOG00000002125	-1.30242	8.96539e-31
Stum	ENSRNOG00000037960	-7.88554	9.32792e-31
Vwc2	ENSRNOG00000049076	-6.78393	9.68388e-31
Peli1	ENSRNOG00000006329	-1.20401	9.93277e-31
LOC501110	ENSRNOG00000033402	-3.39813	9.9515e-31
Igf2bp2	ENSRNOG00000025946	3.67776	1.01008e-30
Rgs4	ENSRNOG00000002773	-7.2087	1.01186e-30
Mybl2	ENSRNOG00000007805	7.30068	1.03801e-30
Trmt6	ENSRNOG00000021270	1.85902	1.08127e-30
Tmc6	ENSRNOG00000053469	5.43397	1.08127e-30
Hist1h2bo	ENSRNOG00000054296	3.22793	1.11518e-30
Itgb8	ENSRNOG00000006569	-4.49616	1.22442e-30
Dnajb4	ENSRNOG00000013011	-1.54567	1.22519e-30
Cchcr1	ENSRNOG00000050233	2.26948	1.36089e-30
Atp6ap2	ENSRNOG00000003858	-1.11271	1.39199e-30
Stt3a	ENSRNOG00000031896	1.08064	1.52709e-30
Plp2	ENSRNOG00000039496	1.53099	1.65939e-30
Psenen	ENSRNOG00000020941	-1.08352	2.04969e-30
Rassf2	ENSRNOG00000021261	-3.60922	2.07847e-30
Ncapg2	ENSRNOG00000004968	2.46313	2.08363e-30
Dnajb9	ENSRNOG00000004006	-1.30124	2.12606e-30
Top2b	ENSRNOG00000048795	-1.01332	2.16232e-30
Sbno2	ENSRNOG00000013987	-2.31512	2.22849e-30
Tnfaip8	ENSRNOG00000026136	-1.54318	2.28907e-30
Fzd6	ENSRNOG00000004660	1.6087	2.32069e-30
Rnf11l1	ENSRNOG00000057589	-1.41389	2.4567e-30
Vars	ENSRNOG00000000867	1.58387	2.518e-30
Lrrc59	ENSRNOG00000003524	1.3552	2.5408e-30
Slc16a2	ENSRNOG00000002832	-5.13778	2.73428e-30
Gpt2	ENSRNOG00000059579	3.37876	3.21716e-30
Pitpnm3	ENSRNOG00000008323	-4.84863	3.35494e-30
Rragd	ENSRNOG00000007331	-2.68273	3.38384e-30
Lrrc34	ENSRNOG00000027935	-8.76766	3.66702e-30
Nlrp3	ENSRNOG00000003170	3.07715	3.98293e-30
Ptbp3	ENSRNOG00000016334	1.30291	4.05624e-30
H2afy2	ENSRNOG00000024751	3.3811	4.32462e-30
Man2b2	ENSRNOG00000061779	4.06217	4.40702e-30
Nusap1	ENSRNOG00000004921	3.8008	4.43734e-30
Grem1	ENSRNOG00000026053	7.28182	4.54278e-30
Corin	ENSRNOG00000002302	-11.8796	5.44999e-30
Metrnl	ENSRNOG00000046202	1.73901	5.69452e-30
Rab39a	ENSRNOG00000009008	7.72692	6.34309e-30
Cry2	ENSRNOG00000007478	-1.37252	6.67841e-30
Stim1	ENSRNOG00000020425	-1.87328	6.7293e-30
LOC102549061	ENSRNOG00000059949	3.72467	6.81432e-30
Pgf	ENSRNOG00000005650	2.87892	7.9116e-30
Eif4e3	ENSRNOG00000010301	-1.98077	7.92403e-30
Rwdd4	ENSRNOG00000022500	1.2721	9.81393e-30
Arhgef28	ENSRNOG00000016544	-3.18307	9.96674e-30
Dusp3	ENSRNOG00000036798	-1.62963	1.00822e-29
Lgr6	ENSRNOG00000005093	-9.80347	1.01718e-29
Ncapd2	ENSRNOG00000055300	2.9563	1.03338e-29
Tusc3	ENSRNOG00000013061	1.2514	1.1708e-29
Fdft1	ENSRNOG00000021314	1.44751	1.19524e-29
Gpr75	ENSRNOG00000022176	-3.4557	1.23036e-29
Med12l	ENSRNOG00000010680	-4.70687	1.2324e-29
Ash1l	ENSRNOG00000020386	-1.11085	1.25662e-29
Hist1h1b	ENSRNOG00000060355	2.80558	1.26398e-29
Zdhhc16	ENSRNOG00000046530	1.29902	1.26826e-29
Ap1s1	ENSRNOG00000001415	1.40889	1.27284e-29
Slc2a12	ENSRNOG00000011161	-2.45011	1.3078e-29
Glrx5	ENSRNOG00000004206	-1.44617	1.31031e-29
Glce	ENSRNOG00000025372	1.52001	1.62614e-29
Tns1	ENSRNOG00000014182	-2.68709	1.65311e-29
Tmcc3	ENSRNOG00000007713	-3.5269	1.68548e-29
Trim59	ENSRNOG00000010515	1.84534	1.76988e-29
Ttc39c	ENSRNOG00000050949	2.11655	1.79279e-29
Hist1h2ail1	ENSRNOG00000046434	5.17473	1.82754e-29
Sos2	ENSRNOG00000004826	-1.49368	1.8946e-29
Ezh2	ENSRNOG00000006048	2.51509	1.8946e-29
Peg12	ENSRNOG00000024429	5.68973	1.93847e-29
Mgp	ENSRNOG00000005695	-2.62165	2.09684e-29
Hist1h3a	ENSRNOG00000046144	4.70632	2.18821e-29
Kdm4b	ENSRNOG00000049221	-1.33284	2.2339e-29
Tmem64	ENSRNOG00000007426	-1.84542	2.31559e-29
Tars	ENSRNOG00000019023	1.5432	2.37894e-29
Vrk2	ENSRNOG00000007864	1.99413	2.55894e-29
Unc119b	ENSRNOG00000021725	1.09214	2.59752e-29
Ncoa3	ENSRNOG00000005616	-1.03324	2.68902e-29
Nucb2	ENSRNOG00000020456	1.03231	2.72737e-29
Cenpu	ENSRNOG00000022261	5.37121	3.06149e-29
Zfhx3	ENSRNOG00000014452	-1.72449	3.11513e-29
Obsl1	ENSRNOG00000015346	-2.27477	3.22023e-29
Mturn	ENSRNOG00000010205	-2.73774	3.27891e-29
Cdca7	ENSRNOG00000001514	5.06132	3.4264e-29
Hjurp	ENSRNOG00000022911	5.08136	3.65276e-29
Depdc1	ENSRNOG00000009503	4.48432	3.90999e-29
Cdk19	ENSRNOG00000000583	-1.30583	3.92325e-29
AABR07027753.2	ENSRNOG00000047776	4.07465	4.06479e-29
Eif3c	ENSRNOG00000018761	1.25473	4.08471e-29
Slc3a2	ENSRNOG00000018487	1.20242	4.43906e-29
Hecw2	ENSRNOG00000013257	-1.50944	4.81812e-29
Me3	ENSRNOG00000017311	-3.88922	5.41295e-29
Trip13	ENSRNOG00000015810	4.86677	5.66389e-29
Cntnap1	ENSRNOG00000020277	-3.34596	6.19267e-29
Tle1	ENSRNOG00000005882	-1.54445	6.25271e-29
Lnpep	ENSRNOG00000047387	-2.09955	6.34295e-29
Hist1h2an	ENSRNOG00000058437	3.4916	6.55886e-29
Eepd1	ENSRNOG00000006931	-2.14528	7.19645e-29
Nr3c2	ENSRNOG00000034007	-2.5428	8.14162e-29
Lrrc8e	ENSRNOG00000028460	4.51028	8.16543e-29
Adcy9	ENSRNOG00000049768	-1.80023	8.64572e-29
Akr1b10	ENSRNOG00000009734	7.49811	9.11364e-29
Tspyl1	ENSRNOG00000000549	-1.19588	9.77854e-29
Ppp1r14b	ENSRNOG00000021151	1.50564	1.14411e-28
Cdc42ep2	ENSRNOG00000020904	2.95493	1.15232e-28
Gaa	ENSRNOG00000047656	1.83806	1.17099e-28
Tnfrsf19	ENSRNOG00000014265	-7.43496	1.30197e-28
Bdh1	ENSRNOG00000001736	3.76994	1.35405e-28
Ankrd44	ENSRNOG00000021384	-1.943	1.37914e-28
Adcy5	ENSRNOG00000002229	-5.46675	1.37974e-28
Anxa4	ENSRNOG00000018159	-1.27033	1.40531e-28
Mad2l1	ENSRNOG00000005376	3.38456	1.50664e-28
Hdgf	ENSRNOG00000042261	1.51533	1.6294e-28
Def6	ENSRNOG00000000502	3.29862	1.67458e-28
Ncstn	ENSRNOG00000005355	1.06173	1.71821e-28
Aatf	ENSRNOG00000002778	1.54905	1.82125e-28
Frmd8	ENSRNOG00000020881	1.28723	1.8631e-28
Rab20	ENSRNOG00000023991	-1.75696	1.87306e-28
Cep164	ENSRNOG00000029826	1.41752	1.93688e-28
Fam83d	ENSRNOG00000015794	2.9293	2.16915e-28
LOC102548695	ENSRNOG00000055608	-2.88573	2.17903e-28
Ahnak2	ENSRNOG00000028545	2.62002	2.25133e-28
Ppp4c	ENSRNOG00000019813	1.14822	2.31939e-28
Inpp4a	ENSRNOG00000017660	-1.72094	2.32655e-28
Myo18b	ENSRNOG00000048430	-11.343	2.34669e-28
Rnf19b	ENSRNOG00000000123	-2.00382	2.39183e-28
Rcc1	ENSRNOG00000050106	2.4589	2.5268e-28
Wfdc1	ENSRNOG00000015904	-2.32114	2.56895e-28
Ep300	ENSRNOG00000000190	-1.42681	2.64854e-28
Txnip	ENSRNOG00000021201	-2.2541	2.75124e-28
Hap1	ENSRNOG00000014819	-3.87893	2.7544e-28
Cers6	ENSRNOG00000024595	2.61078	2.75767e-28
RGD1305938	ENSRNOG00000052775	-1.81297	2.81731e-28
Adamts1	ENSRNOG00000001607	-2.02009	3.05707e-28
Ccdc65	ENSRNOG00000058916	-1.78684	3.05857e-28
C1s	ENSRNOG00000011971	-2.59544	3.10461e-28
Dhcr7	ENSRNOG00000020776	2.92863	3.18591e-28
Aplp1	ENSRNOG00000020851	4.42063	3.35943e-28
Mms22l	ENSRNOG00000006996	4.84434	3.55438e-28
Gins4	ENSRNOG00000018040	3.35048	3.74623e-28
Abcb1a	ENSRNOG00000008012	3.92028	3.80533e-28
Smpd5	ENSRNOG00000037299	3.03573	3.82856e-28
Timp3	ENSRNOG00000004303	-2.88915	4.19431e-28
Enpp1	ENSRNOG00000013994	1.60172	4.33509e-28
Fbxo40	ENSRNOG00000002459	-9.46391	4.58395e-28
Mtus2	ENSRNOG00000032410	-3.3884	4.79355e-28
Fam46b	ENSRNOG00000056153	3.81195	4.96471e-28
Glrx3	ENSRNOG00000016227	1.22112	5.53673e-28
Pdgfra	ENSRNOG00000002244	2.98938	5.53768e-28
Ap2a2	ENSRNOG00000019534	1.35773	5.6916e-28
Prmt3	ENSRNOG00000014829	2.23658	5.72017e-28
Aaas	ENSRNOG00000013445	1.89527	6.1698e-28
Sms	ENSRNOG00000007688	1.48432	7.121e-28
Fbxo30	ENSRNOG00000014852	-1.79456	7.52564e-28
Sh3bgrl	ENSRNOG00000002280	-1.56196	8.42669e-28
Tmem9	ENSRNOG00000010204	1.20995	8.42669e-28
Axin2	ENSRNOG00000055010	-2.80433	8.65693e-28
Tmem30a	ENSRNOG00000010895	-1.07289	8.70887e-28
Kif18b	ENSRNOG00000021713	4.76561	8.70887e-28
Nbeal1	ENSRNOG00000021525	-1.4629	8.8003e-28
Dtl	ENSRNOG00000004195	4.37838	9.29342e-28
Pak4	ENSRNOG00000019883	1.38955	9.44059e-28
Rgs19	ENSRNOG00000016547	2.21739	1.05314e-27
Mylk	ENSRNOG00000002215	-2.77471	1.06814e-27
Rps27l	ENSRNOG00000050473	1.62811	1.13567e-27
Ints7	ENSRNOG00000004263	1.44466	1.15217e-27
Hs6st1	ENSRNOG00000014516	2.129	1.23159e-27
Src	ENSRNOG00000009495	-1.41863	1.26671e-27
Bzw2	ENSRNOG00000005096	1.77828	1.28322e-27
Cep128	ENSRNOG00000003908	2.07262	1.40147e-27
Slx4ip	ENSRNOG00000007430	2.2075	1.449e-27
Sh3bp5	ENSRNOG00000052391	3.76071	1.75893e-27
Ddias	ENSRNOG00000022521	4.56213	1.7598e-27
Prkd1	ENSRNOG00000004165	-1.89515	1.78261e-27
Ier3	ENSRNOG00000000827	-1.31677	1.82549e-27
Ppp2r3a	ENSRNOG00000022999	-1.64634	1.84788e-27
LOC100364835	ENSRNOG00000059382	4.41712	1.85716e-27
Prodh1	ENSRNOG00000000281	-7.57068	2.02777e-27
Dguok	ENSRNOG00000011617	-1.29435	2.1716e-27
Cnpy3	ENSRNOG00000016315	1.45355	2.20951e-27
Cc2d1b	ENSRNOG00000008634	1.09602	2.22271e-27
Carhsp1	ENSRNOG00000002610	1.38231	2.34591e-27
Ola1	ENSRNOG00000019047	1.13378	2.37625e-27
Tasp1	ENSRNOG00000004493	-1.8874	2.41365e-27
Rnft2	ENSRNOG00000001124	3.5254	2.50465e-27
LOC100910996	ENSRNOG00000060879	-4.60737	2.5513e-27
Plekha7	ENSRNOG00000024602	2.73214	2.6989e-27
Dock11	ENSRNOG00000013321	-2.39198	2.80313e-27
Pomt1	ENSRNOG00000010477	1.70798	2.80313e-27
Sema3d	ENSRNOG00000007202	-2.23947	2.87368e-27
Fam118a	ENSRNOG00000013764	-1.295	2.94396e-27
Spats2l	ENSRNOG00000016012	-1.28985	2.96359e-27
Wtip	ENSRNOG00000023296	-1.76465	3.14757e-27
Sema5b	ENSRNOG00000002238	-5.27243	3.26565e-27
Gpd1	ENSRNOG00000056457	-5.15298	3.4119e-27
Prag1	ENSRNOG00000011407	3.83504	3.47843e-27
Mlkl	ENSRNOG00000042353	2.54628	3.66491e-27
Pcmtd1	ENSRNOG00000005730	-1.26862	3.85782e-27
Sema4c	ENSRNOG00000016254	-1.71092	3.93386e-27
Mx1	ENSRNOG00000001959	-6.0815	4.52757e-27
Rap2a	ENSRNOG00000051564	1.68067	4.60991e-27
Hsd17b12	ENSRNOG00000009630	1.13111	5.06218e-27
Kdm3a	ENSRNOG00000007814	-1.13796	5.17676e-27
Calml3	ENSRNOG00000031955	-9.35411	5.21473e-27
Nrn1	ENSRNOG00000050767	5.67492	5.40107e-27
Zcchc12	ENSRNOG00000013162	-7.3687	5.40226e-27
Kif18a	ENSRNOG00000005037	3.26666	5.72088e-27
Acbd4	ENSRNOG00000003108	-1.74565	5.82933e-27
Gpsm2	ENSRNOG00000012149	-2.3715	6.41319e-27
Kazald1	ENSRNOG00000016058	2.68411	6.5541e-27
Ddah1	ENSRNOG00000014613	2.17312	7.05695e-27
Hist1h2bk	ENSRNOG00000055512	4.09964	7.20712e-27
Tmem136	ENSRNOG00000021793	-3.4794	7.3265e-27
Prelid1	ENSRNOG00000016410	1.24958	7.54605e-27
Cacna1h	ENSRNOG00000033893	-6.45367	8.24117e-27
Rhpn2	ENSRNOG00000011885	3.33628	8.26198e-27
Aldh2	ENSRNOG00000001344	-1.4712	8.26789e-27
Ttpal	ENSRNOG00000009076	1.14903	9.13462e-27
Tsr1	ENSRNOG00000002980	1.42692	9.40703e-27
Rad23b	ENSRNOG00000016137	1.05376	9.85933e-27
Rgs5	ENSRNOG00000002730	-6.76695	1.15215e-26
Sipa1l1	ENSRNOG00000007646	1.80548	1.2655e-26
Ccdc126	ENSRNOG00000009322	2.21475	1.3056e-26
Dnajb5	ENSRNOG00000000130	-2.18153	1.35609e-26
Parp4	ENSRNOG00000051196	-1.3803	1.38764e-26
Pccb	ENSRNOG00000015869	-1.00559	1.50326e-26
Ifi27l2b	ENSRNOG00000026605	5.53068	1.54287e-26
Spc25	ENSRNOG00000006731	3.11406	1.57694e-26
Ncapd3	ENSRNOG00000008932	2.31612	1.72736e-26
Rilp	ENSRNOG00000003784	-2.80767	1.73947e-26
Hk2	ENSRNOG00000006116	-1.77539	1.8858e-26
Plxdc2	ENSRNOG00000000142	-1.99388	1.93639e-26
Shkbp1	ENSRNOG00000020882	2.88984	2.08939e-26
C1qbp	ENSRNOG00000006949	1.01501	2.1302e-26
Pfkfb3	ENSRNOG00000018911	-1.53798	2.17792e-26
Ran	ENSRNOG00000000938	1.49052	2.17976e-26
Emx2	ENSRNOG00000009482	4.37379	2.37414e-26
Sox8	ENSRNOG00000018841	-4.94962	2.37785e-26
Igfbp6	ENSRNOG00000010977	3.41892	2.498e-26
Fam13c	ENSRNOG00000000275	-2.91492	2.5992e-26
Rgs2	ENSRNOG00000003687	-3.04215	2.7329e-26
Mb21d2	ENSRNOG00000024040	-2.01026	2.75024e-26
Ifi47	ENSRNOG00000002470	-3.07856	2.96699e-26
Gkap1	ENSRNOG00000019272	-1.10739	3.09075e-26
Tmem82	ENSRNOG00000011970	-6.65043	3.10601e-26
Arap1	ENSRNOG00000019555	1.12843	3.26433e-26
Rbl1	ENSRNOG00000006921	3.1602	3.26433e-26
Pon3	ENSRNOG00000009096	-5.02476	3.39875e-26
Loxl3	ENSRNOG00000061373	1.52127	3.97727e-26
Vps36	ENSRNOG00000012654	1.27274	4.20869e-26
Neo1	ENSRNOG00000006490	-1.62131	4.21567e-26
Nek2	ENSRNOG00000004487	3.78428	4.48075e-26
Abcd3	ENSRNOG00000011929	-1.05556	4.48848e-26
Hs2st1	ENSRNOG00000012549	1.51788	4.72018e-26
Mrvi1	ENSRNOG00000017767	-2.98229	5.00268e-26
Cenpn	ENSRNOG00000011296	3.10453	5.26297e-26
Kbtbd6	ENSRNOG00000047604	-3.13891	6.10538e-26
Selenoi	ENSRNOG00000059295	1.37537	6.69883e-26
Mtmr11	ENSRNOG00000021176	-1.86329	6.75666e-26
Nup205	ENSRNOG00000010852	1.5832	6.83186e-26
Txndc15	ENSRNOG00000000133	-1.02831	7.11751e-26
Adamts15	ENSRNOG00000009892	-3.79778	7.6171e-26
LOC108348098	ENSRNOG00000020117	1.97874	7.82909e-26
Sned1	ENSRNOG00000023548	-6.7377	7.88513e-26
Rnd2	ENSRNOG00000020698	-2.53725	8.60997e-26
Kdm6a	ENSRNOG00000052721	-1.18977	9.48772e-26
Plod3	ENSRNOG00000001417	1.41186	1.03302e-25
Ablim3	ENSRNOG00000019365	-4.19225	1.03935e-25
Adamts7	ENSRNOG00000028036	5.24446	1.04163e-25
Csdc2	ENSRNOG00000005332	-5.86798	1.10273e-25
Pold4	ENSRNOG00000018765	-1.19588	1.20685e-25
Memo1	ENSRNOG00000006340	1.12941	1.39181e-25
Eif4e2	ENSRNOG00000019634	1.25635	1.52126e-25
Pxmp2	ENSRNOG00000037446	-2.77416	1.53452e-25
Aldh16a1	ENSRNOG00000020623	1.45352	1.66092e-25
Taf9b	ENSRNOG00000061102	-1.86345	1.67069e-25
Mycn	ENSRNOG00000051372	5.23306	1.79687e-25
Mcm4	ENSRNOG00000001833	2.22526	1.80798e-25
Taf10	ENSRNOG00000019178	1.7685	1.82401e-25
Ccdc149	ENSRNOG00000024454	-1.43799	1.89942e-25
Psmc3	ENSRNOG00000011414	1.1882	1.93998e-25
Ssr4	ENSRNOG00000053172	1.23987	2.07054e-25
Dot1l	ENSRNOG00000032546	-2.05078	2.27584e-25
Dhx32	ENSRNOG00000018119	-1.19778	2.43505e-25
Hspb6	ENSRNOG00000020922	-2.10651	2.44432e-25
LOC100911664	ENSRNOG00000018456	-1.26075	2.4454e-25
Klhl38	ENSRNOG00000007896	-5.17961	2.54981e-25
Eef1a2	ENSRNOG00000012477	-7.56507	2.55357e-25
Rbpms	ENSRNOG00000013328	-1.91253	2.61019e-25
Smpdl3b	ENSRNOG00000042326	4.1448	2.71247e-25
Inpp5a	ENSRNOG00000017635	-1.44193	3.231e-25
Dnase2	ENSRNOG00000023830	1.77591	3.23732e-25
Dmxl1	ENSRNOG00000024671	-1.05497	3.36598e-25
Lrch2	ENSRNOG00000029582	-4.44682	3.39497e-25
Itpr1	ENSRNOG00000007104	-1.58518	3.50641e-25
Ints6	ENSRNOG00000009873	-1.07189	4.35829e-25
Lpin3	ENSRNOG00000016636	2.3905	4.51028e-25
Slit3	ENSRNOG00000007377	-2.48597	5.42401e-25
Scara3	ENSRNOG00000016177	-1.83809	5.62679e-25
Ostm1	ENSRNOG00000037647	1.24952	5.76254e-25
Chid1	ENSRNOG00000050181	1.47152	5.96272e-25
Sult1d1	ENSRNOG00000001960	-5.18094	5.96961e-25
Ube2q2l	ENSRNOG00000023261	2.06908	6.10569e-25
Actr3b	ENSRNOG00000031855	-3.51345	6.57032e-25
Tuba1a	ENSRNOG00000060728	1.74841	6.73125e-25
Prkaa2	ENSRNOG00000007706	-2.92467	6.8551e-25
LOC103691744	ENSRNOG00000010658	5.27773	6.92661e-25
Fgd4	ENSRNOG00000059491	-3.37891	7.70091e-25
Ndst3	ENSRNOG00000015781	6.25607	8.01193e-25
Gga2	ENSRNOG00000018599	1.10049	8.98646e-25
Odf2	ENSRNOG00000014584	1.31876	9.37463e-25
Tmem209	ENSRNOG00000028219	2.05281	9.5329e-25
Itfg1	ENSRNOG00000015843	-1.22473	9.76415e-25
Ada	ENSRNOG00000010265	3.1462	1.04239e-24
C1qtnf6	ENSRNOG00000007300	1.48294	1.12854e-24
Ap1g2	ENSRNOG00000025619	3.62777	1.21334e-24
Cnot9	ENSRNOG00000016034	1.10438	1.29654e-24
Vsig1	ENSRNOG00000054219	-6.88978	1.34367e-24
Tns2	ENSRNOG00000010588	-1.59359	1.43731e-24
Csmd2	ENSRNOG00000007057	-6.44463	1.44693e-24
Dtx3	ENSRNOG00000005129	-1.73489	1.59067e-24
Dgkh	ENSRNOG00000010065	-1.6201	1.8404e-24
Haus4	ENSRNOG00000039284	2.70474	1.88149e-24
Fanca	ENSRNOG00000016706	4.65417	2.43164e-24
Mtss1l	ENSRNOG00000017500	-2.15968	2.43794e-24
Bri3	ENSRNOG00000001009	-1.56909	2.56532e-24
Rin3	ENSRNOG00000007062	2.89346	2.60857e-24
Nup93	ENSRNOG00000018564	1.59356	2.61073e-24
Lrrc20	ENSRNOG00000000560	2.41758	2.66943e-24
Fen1	ENSRNOG00000020531	2.68887	2.71253e-24
Apobec3b	ENSRNOG00000016852	6.01235	2.74216e-24
Syne2	ENSRNOG00000005323	-1.64237	2.90079e-24
Esr1	ENSRNOG00000019358	-2.85155	2.95109e-24
Bex3	ENSRNOG00000028822	-1.21995	3.07347e-24
Reep4	ENSRNOG00000011373	2.23939	3.08014e-24
Arl4a	ENSRNOG00000004282	-2.7001	3.10067e-24
Ppp1r14a	ENSRNOG00000020676	-3.13047	3.42115e-24
Atp11b	ENSRNOG00000052116	-1.00534	3.51851e-24
Fnip1	ENSRNOG00000009104	-1.29801	3.63459e-24
Apeh	ENSRNOG00000029572	1.05122	4.16361e-24
Naalad2	ENSRNOG00000005955	-4.22247	4.27472e-24
Ninl	ENSRNOG00000027747	1.85557	4.52479e-24
Gprasp2	ENSRNOG00000037658	-2.30721	4.62972e-24
Hist1h2bl	ENSRNOG00000053845	3.79079	4.71772e-24
Akap1	ENSRNOG00000002373	-1.15545	4.89234e-24
Scarb1	ENSRNOG00000000981	2.63781	4.96655e-24
Prkcz	ENSRNOG00000015480	-3.91715	5.12251e-24
Ddit4	ENSRNOG00000057078	-2.8557	5.26558e-24
Pak1	ENSRNOG00000029784	1.37342	5.45963e-24
Iars	ENSRNOG00000014616	1.5526	5.59586e-24
Gale	ENSRNOG00000009712	2.03267	5.67821e-24
Klhl15	ENSRNOG00000006515	-1.76732	5.74572e-24
Dcun1d1	ENSRNOG00000012734	-1.24302	5.90748e-24
Ap1s3	ENSRNOG00000049873	4.82381	6.48975e-24
Has1	ENSRNOG00000010994	-5.0776	6.70518e-24
Irak4	ENSRNOG00000005965	2.1469	6.82442e-24
Blm	ENSRNOG00000011213	3.60187	6.95183e-24
Cpt1a	ENSRNOG00000014254	-1.3347	7.0122e-24
Eef1b2	ENSRNOG00000024186	1.04996	7.04073e-24
Exoc6	ENSRNOG00000036601	-1.92475	7.05299e-24
Fam184a	ENSRNOG00000026407	-2.28563	7.08986e-24
Pgm2	ENSRNOG00000002185	1.07138	7.10075e-24
Mt-co1	ENSRNOG00000034234	-1.56555	7.25925e-24
Adam17	ENSRNOG00000060694	-1.10324	7.37157e-24
Bdnf	ENSRNOG00000047466	2.54934	7.38434e-24
Slc8a2	ENSRNOG00000001492	-10.3025	7.93643e-24
Cdipt	ENSRNOG00000024144	1.23144	7.94618e-24
Stk39	ENSRNOG00000024808	-2.57403	8.52443e-24
Orc1	ENSRNOG00000008841	4.59241	8.80005e-24
Chd6	ENSRNOG00000016744	-1.17767	9.23812e-24
Camk1d	ENSRNOG00000017882	-2.46825	9.26388e-24
Cpt1c	ENSRNOG00000026163	1.66726	9.40764e-24
Echdc2	ENSRNOG00000029333	-1.87042	9.58331e-24
Usp53	ENSRNOG00000014660	-2.05833	1.02887e-23
Cks2	ENSRNOG00000014130	2.56406	1.09122e-23
Wasl	ENSRNOG00000006975	-1.46644	1.18348e-23
Rfc2	ENSRNOG00000001457	2.17422	1.19662e-23
Sybu	ENSRNOG00000004200	-4.60699	1.30667e-23
Irf5	ENSRNOG00000007437	3.4378	1.31926e-23
Slc9a3r2	ENSRNOG00000002997	1.85383	1.36107e-23
Cd3eap	ENSRNOG00000016825	1.17705	1.36354e-23
LOC103689920	ENSRNOG00000056265	-1.6976	1.38004e-23
Nqo2	ENSRNOG00000017820	-2.98433	1.47744e-23
Fxyd1	ENSRNOG00000021079	-4.94187	1.56296e-23
Acer2	ENSRNOG00000007637	-3.39699	1.66808e-23
Ndn	ENSRNOG00000010146	2.77901	1.7318e-23
Abhd14b	ENSRNOG00000012073	-1.31172	2.05724e-23
Hebp2	ENSRNOG00000053735	4.24773	2.06314e-23
Adgrg1	ENSRNOG00000014963	-4.21073	2.07942e-23
Fgd6	ENSRNOG00000054515	-2.84868	2.08423e-23
LOC100911730	ENSRNOG00000019215	1.254	2.1126e-23
Itm2a	ENSRNOG00000002365	-5.303	2.11593e-23
Zfp217	ENSRNOG00000021787	2.85479	2.17007e-23
LOC100912604	ENSRNOG00000046379	1.15094	2.21401e-23
Eno2	ENSRNOG00000013141	2.02601	2.25091e-23
Il6st	ENSRNOG00000013963	1.4783	2.31306e-23
LOC100911769	ENSRNOG00000055809	-2.82454	2.43261e-23
Polr2a	ENSRNOG00000028834	-1.70883	2.52808e-23
Hs3st1	ENSRNOG00000010598	-5.21623	2.67421e-23
Sh3bp5l	ENSRNOG00000054400	1.20378	2.74808e-23
Rn50_2_1764.2	ENSRNOG00000051085	-3.15395	3.02176e-23
Pafah2	ENSRNOG00000022288	1.5857	3.10089e-23
Foxn3	ENSRNOG00000004709	-2.19453	3.22352e-23
AABR07073181.1	ENSRNOG00000021437	-2.07696	3.26036e-23
Cdkn2aip	ENSRNOG00000022736	-1.08334	3.40744e-23
Hist1h2ak	ENSRNOG00000052594	4.69671	3.54821e-23
Cdh6	ENSRNOG00000013535	-12.091	3.67143e-23
Phf13	ENSRNOG00000009046	-1.1346	3.85654e-23
Mtmr2	ENSRNOG00000005923	1.10022	4.11393e-23
Scamp4	ENSRNOG00000018271	1.27006	4.18018e-23
Cenpw	ENSRNOG00000042944	4.08853	4.22996e-23
Ska1	ENSRNOG00000015275	4.01609	4.31924e-23
Ldhd	ENSRNOG00000019036	-1.64774	4.32939e-23
Zdhhc12	ENSRNOG00000015791	1.889	4.384e-23
Gss	ENSRNOG00000018964	1.34894	4.6308e-23
Tmem106b	ENSRNOG00000006206	-1.33057	4.71005e-23
Fbxo5	ENSRNOG00000024077	2.80903	4.89039e-23
Irf8	ENSRNOG00000017869	-2.16189	5.02996e-23
AABR07027752.2	ENSRNOG00000057700	4.10716	5.09591e-23
Fam110b	ENSRNOG00000009114	-1.49632	5.12909e-23
Hspb8	ENSRNOG00000022392	2.27275	5.22504e-23
Nid2	ENSRNOG00000000341	3.71664	5.56288e-23
Polg2	ENSRNOG00000013728	-1.83998	5.72794e-23
Slc41a3	ENSRNOG00000045821	1.39455	5.9715e-23
Smap2	ENSRNOG00000011421	1.77494	6.18218e-23
Fam69a	ENSRNOG00000023533	-1.78099	6.26897e-23
Cidea	ENSRNOG00000018505	-2.37344	6.29052e-23
Arrdc3	ENSRNOG00000045649	-1.95877	6.3475e-23
Ddx1	ENSRNOG00000006652	1.27278	6.63443e-23
Atp1b1	ENSRNOG00000002934	-3.3667	6.67146e-23
Ckm	ENSRNOG00000016837	-11.9485	7.18232e-23
Ywhae	ENSRNOG00000005290	1.36556	7.21637e-23
Chaf1a	ENSRNOG00000046479	2.1217	7.66809e-23
Mier3	ENSRNOG00000013121	-1.49098	7.92369e-23
Crebl2	ENSRNOG00000007115	-2.44192	8.26175e-23
Nampt	ENSRNOG00000009754	-1.49532	8.40799e-23
Id4	ENSRNOG00000016099	-1.59321	8.7384e-23
Lima1	ENSRNOG00000059801	2.39386	9.33513e-23
Cep85l	ENSRNOG00000000414	-1.89689	9.37978e-23
Zfp354c	ENSRNOG00000029205	-1.22266	9.47806e-23
Itgbl1	ENSRNOG00000004516	-1.57487	9.57339e-23
Dnmt1	ENSRNOG00000039859	2.00132	9.91924e-23
Oxsr1	ENSRNOG00000013136	-1.03429	1.01757e-22
Fmn1	ENSRNOG00000031760	2.99747	1.09761e-22
Kcnk3	ENSRNOG00000009790	-7.77608	1.09769e-22
Yars	ENSRNOG00000007213	2.142	1.13229e-22
Acot7	ENSRNOG00000010580	2.11712	1.18551e-22
Ikbke	ENSRNOG00000025100	1.51868	1.20469e-22
Gramd1c	ENSRNOG00000053406	-1.87428	1.2274e-22
LOC108348074	ENSRNOG00000039197	-3.45113	1.24953e-22
AABR07009834.1	ENSRNOG00000061630	-3.28442	1.29697e-22
Bmp2	ENSRNOG00000021276	-3.83902	1.37725e-22
Cep68	ENSRNOG00000027282	1.04824	1.46348e-22
Grasp	ENSRNOG00000007346	2.7611	1.51329e-22
Rcc2	ENSRNOG00000006327	1.96723	1.52814e-22
Pigs	ENSRNOG00000011366	1.10794	1.56832e-22
Troap	ENSRNOG00000060703	4.9696	1.74255e-22
Zbtb4	ENSRNOG00000014689	-1.16765	1.78866e-22
Tmem243	ENSRNOG00000042758	-1.84305	1.98249e-22
Arl14ep	ENSRNOG00000004891	1.18966	2.00286e-22
Plekhg3	ENSRNOG00000006570	-1.36278	2.01795e-22
Me1	ENSRNOG00000009715	1.27028	2.07803e-22
E2f1	ENSRNOG00000016708	2.03725	2.10013e-22
Gdnf	ENSRNOG00000012819	-2.82559	2.13473e-22
Rb1	ENSRNOG00000016029	-1.53154	2.22238e-22
Pcdhb10	ENSRNOG00000029244	-3.92406	2.25101e-22
Mmp2	ENSRNOG00000016695	-1.81393	2.25189e-22
Nop58	ENSRNOG00000016486	1.05131	2.27608e-22
Necap1	ENSRNOG00000009236	1.21585	2.47436e-22
Gjc1	ENSRNOG00000048838	-1.62465	2.59919e-22
Necap2	ENSRNOG00000008427	1.13973	2.7396e-22
Pdp1	ENSRNOG00000016180	-1.40996	2.74843e-22
Gng11	ENSRNOG00000047914	-1.5019	2.84832e-22
Sema3b	ENSRNOG00000016512	-3.03573	3.18563e-22
Papss2	ENSRNOG00000011068	2.48261	3.37406e-22
Phf19	ENSRNOG00000018874	3.68737	3.46019e-22
Gins1	ENSRNOG00000008091	4.15321	3.49048e-22
Recql4	ENSRNOG00000032446	3.34321	3.65469e-22
Plk3	ENSRNOG00000018484	-2.18295	3.74796e-22
Sync	ENSRNOG00000008118	-1.67396	3.80774e-22
RGD1309748	ENSRNOG00000002545	-1.22104	3.89038e-22
Fam210b	ENSRNOG00000004466	-2.06248	3.90474e-22
Bambi	ENSRNOG00000016066	-1.48653	3.98289e-22
Tfdp1	ENSRNOG00000019222	1.41827	3.98712e-22
Cpsf7	ENSRNOG00000020668	-1.04181	4.1287e-22
Psme3	ENSRNOG00000051344	1.33811	4.1419e-22
Fads2	ENSRNOG00000020440	-1.9145	4.29202e-22
Fabp3	ENSRNOG00000012879	3.16914	4.33786e-22
Ptpdc1	ENSRNOG00000026564	-1.9642	4.46222e-22
Entpd4	ENSRNOG00000016321	-1.04378	4.52995e-22
Eva1c	ENSRNOG00000002072	-2.33679	4.61505e-22
Zhx2	ENSRNOG00000005417	-1.39576	4.70876e-22
Ankrd1	ENSRNOG00000018598	5.72802	4.85119e-22
Trap1	ENSRNOG00000005418	1.08121	4.98666e-22
Ticrr	ENSRNOG00000015520	4.45645	5.20075e-22
Uggt2	ENSRNOG00000058057	1.03042	5.47151e-22
Cobl	ENSRNOG00000004281	1.92464	5.47311e-22
H3f3b	ENSRNOG00000006532	-1.59908	5.51467e-22
Lacc1	ENSRNOG00000022094	4.21252	5.82138e-22
Polq	ENSRNOG00000002471	4.31683	5.8833e-22
Cenpm	ENSRNOG00000023262	3.6873	5.89013e-22
Dusp6	ENSRNOG00000023896	-1.27965	6.04895e-22
Proser2	ENSRNOG00000045553	-3.78071	6.54191e-22
Pnkd	ENSRNOG00000014806	-1.43258	6.58578e-22
Slc39a13	ENSRNOG00000011981	1.12785	6.61402e-22
Rnf207	ENSRNOG00000033722	-2.95664	7.11301e-22
Tmem160	ENSRNOG00000015304	1.74668	7.11632e-22
Gba2	ENSRNOG00000016364	-1.26683	7.39429e-22
Lrrc42	ENSRNOG00000009983	1.11912	7.81484e-22
Bicc1	ENSRNOG00000000614	2.16006	8.45578e-22
B3gnt9	ENSRNOG00000053895	-2.36796	8.48267e-22
Rnf144a	ENSRNOG00000007370	2.81513	8.51483e-22
Fgfr3	ENSRNOG00000016818	2.72401	8.78997e-22
Fam49b	ENSRNOG00000061246	1.0669	8.79219e-22
LOC100910838	ENSRNOG00000024641	-2.05788	8.93484e-22
Frmd4b	ENSRNOG00000007764	-2.06652	9.23261e-22
Mif4gd	ENSRNOG00000003837	-1.36995	9.2855e-22
Vsig2	ENSRNOG00000033490	-4.39986	9.4617e-22
Tcf3	ENSRNOG00000051499	1.09091	9.95627e-22
Tet2	ENSRNOG00000023579	-1.465	9.97968e-22
Acadsb	ENSRNOG00000020624	-1.76901	1.04542e-21
Ddx11	ENSRNOG00000051528	3.05211	1.11756e-21
Nol11	ENSRNOG00000052934	1.40616	1.31599e-21
Myl6	ENSRNOG00000054140	-1.13593	1.40614e-21
Tnfrsf26	ENSRNOG00000043486	4.76467	1.44032e-21
Dstn	ENSRNOG00000005924	-1.22001	1.48052e-21
Prdx6	ENSRNOG00000002896	1.86791	1.52041e-21
P3h2	ENSRNOG00000055751	-11.6738	1.66048e-21
Ppara	ENSRNOG00000021463	-4.17281	1.79625e-21
Adamts17	ENSRNOG00000037080	-5.76439	2.20272e-21
Pcyt2	ENSRNOG00000036684	1.35496	2.21466e-21
Fst	ENSRNOG00000011631	3.49958	2.38524e-21
Llgl1	ENSRNOG00000003948	1.09776	2.48957e-21
Minos1	ENSRNOG00000042696	1.11296	2.59995e-21
Mvd	ENSRNOG00000013376	2.45867	2.68488e-21
Dtx4	ENSRNOG00000021086	3.14962	2.69286e-21
Bend7	ENSRNOG00000022712	-3.91487	2.70374e-21
Sat1	ENSRNOG00000003809	-2.22794	2.76119e-21
Nup62	ENSRNOG00000048733	1.27627	2.83467e-21
Sparc	ENSRNOG00000012840	-1.59551	2.95276e-21
Orai1	ENSRNOG00000001336	1.759	2.95854e-21
Dram1	ENSRNOG00000038916	1.8504	3.0171e-21
Umps	ENSRNOG00000001797	1.40139	3.01932e-21
Msmo1	ENSRNOG00000032297	1.63529	3.1698e-21
Ube4b	ENSRNOG00000014986	1.3451	3.38323e-21
Fgfr1	ENSRNOG00000016050	-2.37878	3.39874e-21
Glt8d2	ENSRNOG00000033579	-3.19037	3.41052e-21
Myocd	ENSRNOG00000003669	-3.06321	3.48549e-21
Mcph1	ENSRNOG00000028586	3.01465	3.70054e-21
Fnip2	ENSRNOG00000027833	-1.53479	3.70404e-21
Tanc1	ENSRNOG00000025394	1.75312	3.86502e-21
Akr1c13	ENSRNOG00000050040	-2.8241	3.90859e-21
Gen1	ENSRNOG00000004667	3.81301	3.92478e-21
Fis1	ENSRNOG00000001420	-1.21853	3.96463e-21
Plxna1	ENSRNOG00000017003	1.31602	4.0606e-21
Stk38l	ENSRNOG00000001828	-2.20981	4.31059e-21
Rmi1	ENSRNOG00000019108	1.18015	4.36714e-21
Hivep3	ENSRNOG00000009341	-2.70308	4.36834e-21
Nat6	ENSRNOG00000054063	-1.70647	4.4769e-21
Hsph1	ENSRNOG00000000902	-1.74314	4.51766e-21
Dynlt1	ENSRNOG00000018207	1.28948	4.64126e-21
Casp8	ENSRNOG00000012331	1.93858	4.77314e-21
Slc39a11	ENSRNOG00000031213	1.4087	5.14012e-21
Nde1	ENSRNOG00000058007	1.53796	5.22564e-21
Hlx	ENSRNOG00000002309	-1.89641	5.32017e-21
Slc7a1	ENSRNOG00000000924	1.66387	5.37327e-21
Cars	ENSRNOG00000020651	1.68759	5.38185e-21
Nfib	ENSRNOG00000009795	-2.0897	5.41685e-21
Hist1h2ac	ENSRNOG00000059748	4.2113	5.55911e-21
Pdlim3	ENSRNOG00000012658	-5.09333	5.79294e-21
Cenph	ENSRNOG00000018615	4.99343	5.91943e-21
As3mt	ENSRNOG00000020081	-1.53764	6.0031e-21
Pde7a	ENSRNOG00000013048	1.53272	6.15876e-21
Thsd7a	ENSRNOG00000030151	-4.11621	6.44912e-21
Zyg11b	ENSRNOG00000010859	-1.03162	6.71793e-21
AABR07026565.2	ENSRNOG00000059439	-6.23287	6.72146e-21
Cdk14	ENSRNOG00000007151	1.38912	6.88337e-21
Bckdha	ENSRNOG00000020607	-1.25696	7.07577e-21
Slc8a3	ENSRNOG00000029871	-3.52821	7.17134e-21
Plaur	ENSRNOG00000037931	1.87045	7.23718e-21
Ctnna3	ENSRNOG00000000373	-5.71446	7.50044e-21
Hist1h1a	ENSRNOG00000017175	3.1758	7.50044e-21
Ugdh	ENSRNOG00000002643	1.77892	7.55096e-21
LOC100363469	ENSRNOG00000031579	2.48944	7.75089e-21
Col6a6	ENSRNOG00000023007	-8.3197	7.82582e-21
Acvr1b	ENSRNOG00000006934	-1.58501	7.92025e-21
Ndrg1	ENSRNOG00000007393	-1.95657	8.16533e-21
Slc16a13	ENSRNOG00000018785	2.42745	8.41665e-21
Ctdp1	ENSRNOG00000061474	-1.22986	8.50684e-21
Igsf3	ENSRNOG00000023851	2.11664	8.56209e-21
Rad54l	ENSRNOG00000013148	4.26387	8.7085e-21
Orai2	ENSRNOG00000001427	3.47834	8.73644e-21
Mtbp	ENSRNOG00000004412	2.49395	8.80521e-21
Mis18bp1	ENSRNOG00000023093	3.57742	8.88287e-21
Zfp423	ENSRNOG00000014658	-8.13626	9.59735e-21
Fryl	ENSRNOG00000002248	-1.7998	9.61189e-21
Ptrh2	ENSRNOG00000004288	1.46911	9.88429e-21
Slc25a25	ENSRNOG00000014338	-1.43518	9.97e-21
Dhrs7c	ENSRNOG00000026548	-9.80207	1.04987e-20
Sh3bgrl3	ENSRNOG00000015967	1.32162	1.06264e-20
Mut	ENSRNOG00000050843	-1.24976	1.09391e-20
Pkmyt1	ENSRNOG00000003657	4.22234	1.14965e-20
Fkbp10	ENSRNOG00000015941	1.00479	1.15934e-20
Arhgef39	ENSRNOG00000021433	3.37136	1.15934e-20
Eif2b3	ENSRNOG00000018375	1.44986	1.20441e-20
Rgs7	ENSRNOG00000021984	-4.55942	1.21959e-20
Ibsp	ENSRNOG00000002158	-4.88338	1.2229e-20
Gcdh	ENSRNOG00000003307	-1.01035	1.22783e-20
Fam129a	ENSRNOG00000002403	-1.33138	1.24274e-20
Rn60_1_2212.2	ENSRNOG00000062127	-2.11234	1.26954e-20
Ctnna3	ENSRNOG00000000378	-6.31275	1.33637e-20
Dctpp1	ENSRNOG00000017850	3.00719	1.37798e-20
Rhbdl1	ENSRNOG00000019921	-4.26439	1.38633e-20
Ndufa1	ENSRNOG00000052226	-1.40396	1.40934e-20
Cep72	ENSRNOG00000015465	3.36534	1.41178e-20
Stc1	ENSRNOG00000015075	-2.72943	1.44818e-20
Pde4dip	ENSRNOG00000018220	-1.05817	1.46178e-20
Pld3	ENSRNOG00000018390	1.63241	1.47076e-20
Arfgef3	ENSRNOG00000011460	-11.3689	1.50216e-20
Slc6a2	ENSRNOG00000016311	-11.3308	1.51551e-20
Oxr1	ENSRNOG00000056487	-1.09849	1.56026e-20
Klhdc8a	ENSRNOG00000000036	-4.61952	1.67217e-20
Tfg	ENSRNOG00000001633	1.17986	1.68155e-20
Pttg1	ENSRNOG00000003802	4.16739	1.70867e-20
Plg	ENSRNOG00000017223	-5.33703	1.79338e-20
Ube2l3	ENSRNOG00000001862	1.04972	1.80593e-20
LOC102549726	ENSRNOG00000054031	2.08819	1.91745e-20
Gpaa1	ENSRNOG00000029280	1.11567	1.93002e-20
Nlrp1a	ENSRNOG00000023143	4.85965	1.93002e-20
Prr13	ENSRNOG00000042094	1.89338	2.01013e-20
Myh2	ENSRNOG00000049695	5.96837	2.07837e-20
Ophn1	ENSRNOG00000026573	-1.12279	2.14011e-20
Limd2	ENSRNOG00000025448	1.85923	2.2428e-20
Col15a1	ENSRNOG00000060381	-3.06873	2.31723e-20
LOC108348154	ENSRNOG00000011856	-2.18147	2.37027e-20
Slc35b1	ENSRNOG00000004510	1.01246	2.39125e-20
Rnf170	ENSRNOG00000045943	1.70998	2.45179e-20
Lag3	ENSRNOG00000021334	-4.55079	2.51242e-20
Cnpy4	ENSRNOG00000027175	1.15739	2.51882e-20
Mrc1	ENSRNOG00000018251	-3.92467	2.59401e-20
Exo1	ENSRNOG00000056209	6.57266	2.63511e-20
Nek10	ENSRNOG00000005883	-4.75939	2.83725e-20
Nipsnap3b	ENSRNOG00000010332	1.62592	2.86091e-20
Xylb	ENSRNOG00000014168	2.49685	2.89126e-20
Stk38	ENSRNOG00000000519	1.00326	3.02721e-20
Sh2b3	ENSRNOG00000028198	1.76563	3.10767e-20
Cacul1	ENSRNOG00000009954	1.05148	3.21965e-20
Birc5	ENSRNOG00000050819	4.00256	3.23448e-20
Ece2	ENSRNOG00000001715	-1.57566	3.40455e-20
Fkbp9	ENSRNOG00000005478	-1.29149	3.42634e-20
Taf12	ENSRNOG00000048288	1.04689	3.58162e-20
Syne1	ENSRNOG00000018960	-2.33698	3.68482e-20
Tmem97	ENSRNOG00000022657	1.43705	3.69894e-20
Dhrs4	ENSRNOG00000018239	1.79475	3.98232e-20
Scaper	ENSRNOG00000006864	-2.14001	4.05889e-20
Sgms1	ENSRNOG00000012536	-1.45853	4.05889e-20
Amt	ENSRNOG00000050214	-3.30896	4.17016e-20
Cryab	ENSRNOG00000010524	1.13456	4.18554e-20
Insc	ENSRNOG00000024712	-11.1609	4.2635e-20
Cnn2	ENSRNOG00000043044	1.13967	4.29675e-20
Taf7	ENSRNOG00000020024	-1.45727	4.41744e-20
Smarca2	ENSRNOG00000011931	-2.15174	4.43257e-20
Chst2	ENSRNOG00000047734	2.1569	4.43257e-20
Wdr47	ENSRNOG00000020330	-1.07866	4.79493e-20
Ramp3	ENSRNOG00000053766	8.20897	4.88432e-20
Rbp1	ENSRNOG00000013794	-4.712	4.93516e-20
Wrb	ENSRNOG00000001629	-1.28674	4.95335e-20
Kpnb1	ENSRNOG00000009275	1.007	4.95335e-20
Nr2f2	ENSRNOG00000010308	1.91453	4.98791e-20
Cxxc5	ENSRNOG00000032878	-1.28135	5.14701e-20
Pask	ENSRNOG00000016888	2.86168	5.24987e-20
Ramp1	ENSRNOG00000019926	-4.51965	5.26387e-20
Sox5	ENSRNOG00000027869	-2.75395	5.34805e-20
Nipal2	ENSRNOG00000005190	-1.637	5.38971e-20
Nono	ENSRNOG00000003689	1.30159	5.41013e-20
LOC103689968	ENSRNOG00000010589	-1.31419	5.5029e-20
Fam208a	ENSRNOG00000014750	-1.08885	5.59499e-20
Aspnl1	ENSRNOG00000050431	-3.3188	5.76569e-20
Mfsd6	ENSRNOG00000012663	1.07614	5.80612e-20
Nalcn	ENSRNOG00000004752	-2.54601	5.90276e-20
Ralgps2	ENSRNOG00000004736	4.52215	5.99079e-20
Slc27a1	ENSRNOG00000018170	-1.26163	6.00112e-20
SNORA49	ENSRNOG00000054746	-3.21754	6.35063e-20
Phlpp1	ENSRNOG00000002821	-1.07562	6.38816e-20
LOC679811	ENSRNOG00000009837	-1.32835	6.49328e-20
Ppm1l	ENSRNOG00000046168	-1.52682	6.80853e-20
Znfx1	ENSRNOG00000008194	-1.1484	6.81812e-20
Tnpo1	ENSRNOG00000014999	1.07901	6.91258e-20
Mars	ENSRNOG00000025459	1.12795	7.00114e-20
Gsta1	ENSRNOG00000013484	1.56969	7.16224e-20
Slco1a4	ENSRNOG00000047493	-6.05155	7.23599e-20
Dph1	ENSRNOG00000003116	1.19013	7.32291e-20
R3hdml	ENSRNOG00000027432	-6.75007	7.43885e-20
Akap7	ENSRNOG00000013202	-1.72586	7.50512e-20
Lpar4	ENSRNOG00000002428	4.70165	7.52497e-20
Prtfdc1	ENSRNOG00000024874	1.6902	7.61665e-20
Slain2	ENSRNOG00000002271	-1.14951	7.81279e-20
Psrc1	ENSRNOG00000020013	2.79456	8.01724e-20
Itgb3	ENSRNOG00000048449	-3.50793	8.14191e-20
Tmem38a	ENSRNOG00000011912	-2.84388	9.03779e-20
Pwwp2a	ENSRNOG00000003936	-1.13023	9.07443e-20
Casq2	ENSRNOG00000016243	-3.27789	9.42662e-20
LOC103690190	ENSRNOG00000060492	3.64577	9.45602e-20
Cmtm3	ENSRNOG00000010691	2.0593	9.58963e-20
Swt1	ENSRNOG00000032258	-1.01603	9.65685e-20
Rnasel	ENSRNOG00000027017	-1.31588	9.84842e-20
Atl2	ENSRNOG00000006523	-1.23238	1.04906e-19
Mamstr	ENSRNOG00000024580	-4.23534	1.06786e-19
Baiap3	ENSRNOG00000017893	-4.27814	1.08033e-19
Penk	ENSRNOG00000008943	-5.23375	1.09604e-19
Gpatch4	ENSRNOG00000018969	2.5095	1.10423e-19
Ube2b	ENSRNOG00000059348	-1.06018	1.10531e-19
Cbfa2t2	ENSRNOG00000016352	-1.23044	1.11756e-19
Jph3	ENSRNOG00000018784	-5.4195	1.14482e-19
Chd9	ENSRNOG00000049302	-1.18229	1.17431e-19
Smc2	ENSRNOG00000022325	1.94285	1.23268e-19
Rfwd3	ENSRNOG00000051461	1.93485	1.28418e-19
Slc1a5	ENSRNOG00000015948	1.74009	1.29025e-19
LOC100911486	ENSRNOG00000000156	-6.08783	1.30294e-19
Ank2	ENSRNOG00000011076	-1.92228	1.33248e-19
RGD1565536	ENSRNOG00000028910	1.27809	1.36352e-19
Cds2	ENSRNOG00000021265	-1.70449	1.37318e-19
RGD1565616	ENSRNOG00000021237	1.25313	1.38413e-19
Stac	ENSRNOG00000008865	-2.89053	1.38756e-19
Fuca1	ENSRNOG00000009325	1.05893	1.46316e-19
Lamc3	ENSRNOG00000059507	-11.0598	1.46571e-19
Chaf1b	ENSRNOG00000001692	4.43823	1.47718e-19
Nudt10	ENSRNOG00000046053	-6.36605	1.50752e-19
Vtcn1	ENSRNOG00000015279	-6.46944	1.58146e-19
Vat1	ENSRNOG00000020684	1.15989	1.61369e-19
Ing1	ENSRNOG00000014520	-1.07201	1.64523e-19
Slc7a6	ENSRNOG00000019943	1.23602	1.69464e-19
Sapcd2	ENSRNOG00000013069	4.39773	1.7462e-19
Rab32	ENSRNOG00000014258	3.44029	1.76717e-19
Mpi	ENSRNOG00000018898	1.46907	1.78822e-19
Kit	ENSRNOG00000002227	-7.13191	1.84649e-19
Hsd17b7	ENSRNOG00000002826	1.70541	1.93954e-19
RGD1310587	ENSRNOG00000002322	-2.99213	2.13825e-19
Ficd	ENSRNOG00000059799	1.17153	2.2626e-19
Ncs1	ENSRNOG00000008761	1.34754	2.28137e-19
Acta2	ENSRNOG00000058039	-2.94844	2.29843e-19
Tyms	ENSRNOG00000037225	2.47568	2.29843e-19
Arvcf	ENSRNOG00000001888	-1.95406	2.3875e-19
Irf2	ENSRNOG00000009824	-1.84824	2.40435e-19
Phkg1	ENSRNOG00000000920	-7.8507	2.40622e-19
Ypel2	ENSRNOG00000005447	-2.03532	2.40967e-19
Cd83	ENSRNOG00000018092	-8.19767	2.44869e-19
Setd7	ENSRNOG00000013045	-1.01918	2.46937e-19
Dennd3	ENSRNOG00000010794	-2.36048	2.47903e-19
Ipo5	ENSRNOG00000010989	1.34466	2.53943e-19
Klhl30	ENSRNOG00000020105	-1.78214	2.54309e-19
Il15	ENSRNOG00000003439	3.09083	2.58778e-19
Lrrc38	ENSRNOG00000015264	-10.9442	2.69072e-19
Abcb6	ENSRNOG00000018697	1.24182	2.88017e-19
Aldh3b1	ENSRNOG00000017512	2.0965	2.98866e-19
Farsb	ENSRNOG00000014119	1.24321	3.13921e-19
Arhgap10	ENSRNOG00000013152	-1.11402	3.14476e-19
Amdhd2	ENSRNOG00000006460	1.73272	3.18645e-19
Cdc45	ENSRNOG00000050071	4.62202	3.28723e-19
Nexn	ENSRNOG00000012512	-1.83726	3.31367e-19
Crispld1	ENSRNOG00000017773	-4.4342	3.35254e-19
Ccl19	ENSRNOG00000015668	-4.90694	3.39084e-19
Stox2	ENSRNOG00000009590	-6.30563	3.39495e-19
Tmem26	ENSRNOG00000027859	-4.54436	3.55719e-19
Hmgb2l1	ENSRNOG00000013167	2.39744	3.62162e-19
Dera	ENSRNOG00000007570	1.0844	3.62848e-19
Adh7	ENSRNOG00000032959	9.35543	3.86038e-19
Trim47	ENSRNOG00000008215	-1.70871	3.91083e-19
Depdc1b	ENSRNOG00000010701	6.59835	3.9884e-19
Pla2g12a	ENSRNOG00000057470	-1.61738	4.04429e-19
Nsun2	ENSRNOG00000017254	1.16133	4.12362e-19
Aph1a	ENSRNOG00000023816	1.25766	4.35454e-19
Nup133	ENSRNOG00000017919	1.31014	4.38908e-19
Vav2	ENSRNOG00000007422	2.33711	4.51236e-19
Nme3	ENSRNOG00000015749	-2.20047	4.5515e-19
Blvrb	ENSRNOG00000024410	1.51899	4.86219e-19
Tmem45a	ENSRNOG00000042975	-1.87481	4.89745e-19
Cd200r1	ENSRNOG00000039048	6.17396	4.91391e-19
Akr1c19	ENSRNOG00000038319	-4.32914	5.10447e-19
Nme2	ENSRNOG00000002671	1.20849	5.13397e-19
Rfwd2	ENSRNOG00000042492	1.21156	5.20121e-19
Fam57a	ENSRNOG00000007722	2.12174	5.30024e-19
Laptm4a	ENSRNOG00000006865	-1.04354	5.34282e-19
Kcne4	ENSRNOG00000048478	-3.09737	5.76721e-19
Abra	ENSRNOG00000007999	-5.64966	5.91892e-19
Cep41	ENSRNOG00000010950	2.15881	6.04238e-19
Anks1a	ENSRNOG00000000498	-1.54554	6.10687e-19
Dpagt1	ENSRNOG00000009799	1.30377	6.33821e-19
Sox13	ENSRNOG00000028353	-1.38594	6.46322e-19
Haus6	ENSRNOG00000046028	1.59918	6.59781e-19
Gmnn	ENSRNOG00000018782	3.30106	6.82153e-19
Bmper	ENSRNOG00000015357	3.19824	6.85589e-19
Tmem170a	ENSRNOG00000049019	-1.61929	6.91422e-19
RGD1305298	ENSRNOG00000007184	-8.52446	6.98543e-19
LOC680322	ENSRNOG00000052845	5.59675	7.43847e-19
Ankrd29	ENSRNOG00000046744	-1.96701	7.68651e-19
Camkk1	ENSRNOG00000018242	-1.40423	7.69814e-19
Cxcl10	ENSRNOG00000022256	-4.27976	7.74565e-19
Thbs2	ENSRNOG00000010529	-5.08459	8.21052e-19
Pnpla8	ENSRNOG00000039091	-1.1988	8.21461e-19
Got1	ENSRNOG00000016356	1.17275	8.49919e-19
Cep350	ENSRNOG00000003882	-1.00178	8.67474e-19
Bcl2l12	ENSRNOG00000020486	1.60958	8.84565e-19
Pdia6	ENSRNOG00000050197	1.31996	9.253e-19
Pan3	ENSRNOG00000000942	-1.15389	1.02702e-18
Pex6	ENSRNOG00000016655	1.32541	1.04583e-18
Sft2d2	ENSRNOG00000003038	-1.46468	1.07026e-18
Mctp2	ENSRNOG00000009932	-4.57646	1.09655e-18
Mxi1	ENSRNOG00000034078	-1.02643	1.1308e-18
RGD1306227	ENSRNOG00000017581	2.39749	1.14205e-18
Bscl2	ENSRNOG00000052393	1.40224	1.153e-18
Hip1r	ENSRNOG00000001091	-2.42239	1.21485e-18
LOC100910708	ENSRNOG00000027433	5.7351	1.22671e-18
Abca7	ENSRNOG00000012939	2.31468	1.24456e-18
Ulk1	ENSRNOG00000037505	-1.91728	1.29307e-18
Map3k2	ENSRNOG00000014089	-1.27337	1.30097e-18
Trim2	ENSRNOG00000010124	2.64223	1.3036e-18
Ddah2	ENSRNOG00000000842	-1.95199	1.36736e-18
Dusp28	ENSRNOG00000057389	-3.65985	1.41953e-18
Mmp15	ENSRNOG00000012622	-3.34152	1.46142e-18
Bcl2	ENSRNOG00000002791	-1.70981	1.47026e-18
Phf8	ENSRNOG00000002708	-1.09864	1.47026e-18
Metap2	ENSRNOG00000021881	1.06882	1.47962e-18
Rn50_1_0430.2	ENSRNOG00000055166	-4.09751	1.4819e-18
Raph1	ENSRNOG00000014722	2.29937	1.50574e-18
Hist1h2bd	ENSRNOG00000060769	4.34716	1.51236e-18
Map4	ENSRNOG00000020748	-1.20958	1.59401e-18
Hes1	ENSRNOG00000001720	-1.51411	1.62841e-18
AABR07033324.1	ENSRNOG00000061099	-1.59324	1.64474e-18
Hist1h3b	ENSRNOG00000056281	4.75344	1.68108e-18
Vbp1	ENSRNOG00000050401	-1.51318	1.81035e-18
Slc22a3	ENSRNOG00000022946	-9.1809	1.8119e-18
Ski	ENSRNOG00000055340	-1.48125	1.91495e-18
Rnf4	ENSRNOG00000013930	1.06204	1.91495e-18
Stk40	ENSRNOG00000025679	-1.39325	1.94981e-18
Mapk1ip1l	ENSRNOG00000011611	1.03916	1.96523e-18
Vat1l	ENSRNOG00000011989	-10.65	2.00226e-18
Nfatc1	ENSRNOG00000017146	-2.34271	2.06106e-18
Fdps	ENSRNOG00000043377	1.27218	2.12924e-18
Kat6a	ENSRNOG00000025174	-1.25034	2.18533e-18
Akap17b	ENSRNOG00000009746	-1.36652	2.32382e-18
Gapdh-ps2	ENSRNOG00000033057	1.51462	2.35415e-18
LOC103692716	ENSRNOG00000059714	-1.14504	2.3768e-18
Hist1h2bcl1	ENSRNOG00000021198	1.11059	2.4149e-18
LOC100911660	ENSRNOG00000047692	4.16014	2.53264e-18
Etv4	ENSRNOG00000020792	6.98599	3.08093e-18
Crhr2	ENSRNOG00000011145	-9.00667	3.13945e-18
Slc6a8	ENSRNOG00000057620	-1.24757	3.27487e-18
Lnpk	ENSRNOG00000001593	1.19093	3.39322e-18
Pafah1b3	ENSRNOG00000020481	3.5083	3.41234e-18
Adam9	ENSRNOG00000017231	-1.29269	3.54658e-18
E2f7	ENSRNOG00000026252	4.04865	3.69901e-18
Tinagl1	ENSRNOG00000013179	-1.76312	3.73193e-18
Clk4	ENSRNOG00000003714	-1.74069	3.79949e-18
Smtn	ENSRNOG00000019451	-1.98128	3.82317e-18
Lmod1	ENSRNOG00000051548	-1.80997	3.97039e-18
AABR07068127.1	ENSRNOG00000025970	-1.29719	4.05635e-18
AABR07053136.1	ENSRNOG00000060735	-2.8764	4.17687e-18
Neurl3	ENSRNOG00000015366	-2.08866	4.37517e-18
Slc2a6	ENSRNOG00000005900	4.02987	4.39573e-18
Lcp2	ENSRNOG00000005620	-4.93977	4.75266e-18
[truncated: 3,661 more rows]

## Sheet: D Ctr vs P Ctr
Gene.name	Ensembl	log2.Fold.Change	padj.value
Tmem200b	ENSRNOG00000032018	-20.2809	1.70069e-05
Cdh5	ENSRNOG00000013324	-12.1952	2.30502e-22
Adad2	ENSRNOG00000015690	-11.8613	8.08684e-20
Aass	ENSRNOG00000039494	-11.3574	7.24853e-19
Slc6a17	ENSRNOG00000050090	-11.2611	1.62684e-17
Mael	ENSRNOG00000003790	-11.1588	2.40178e-17
Slc7a3	ENSRNOG00000004133	-10.8548	1.26144e-09
Tex19.2	ENSRNOG00000036671	-10.6147	2.51196e-16
Rbm46	ENSRNOG00000025823	-10.5438	1.43055e-15
Ntrk1	ENSRNOG00000013953	-10.5193	1.67864e-15
Acan	ENSRNOG00000028992	-10.4404	2.87707e-104
Ddx4	ENSRNOG00000026686	-10.4272	1.29171e-15
Sycp1	ENSRNOG00000016835	-10.4196	2.00458e-15
Npepl1	ENSRNOG00000028384	-10.2723	5.67106e-14
Bace2	ENSRNOG00000001953	-10.267	2.56719e-13
Ube2q2l	ENSRNOG00000023261	-10.2598	5.92029e-08
Sohlh1	ENSRNOG00000033983	-10.1322	1.87922e-34
Kif26a	ENSRNOG00000013661	-10.1257	6.32976e-35
RGD1310819	ENSRNOG00000018366	-10.0681	1.07995e-18
Neto2	ENSRNOG00000016245	-10.0219	6.50581e-14
Tdrkh	ENSRNOG00000020860	-10.0191	7.47799e-14
Apcdd1	ENSRNOG00000043304	-9.79691	2.96646e-10
Nrgn	ENSRNOG00000010688	-9.71419	4.85637e-18
Kcng3	ENSRNOG00000004535	-9.59325	7.27827e-12
Mn1	ENSRNOG00000027489	-9.58755	2.83843e-10
Snca	ENSRNOG00000008656	-9.58552	1.95977e-12
Cpeb1	ENSRNOG00000019161	-9.51702	1.53158e-30
Cecr2	ENSRNOG00000011566	-9.50134	1.34623e-11
Stmn2	ENSRNOG00000011705	-9.50053	1.60099e-25
Tgfbi	ENSRNOG00000012216	-9.46782	1.59457e-73
Slc25a31	ENSRNOG00000038398	-9.40968	5.03896e-09
Fkbp6	ENSRNOG00000001451	-9.37938	3.77563e-59
Igf2bp1	ENSRNOG00000006122	-9.37707	2.2742e-12
Egln3	ENSRNOG00000005053	-9.37393	1.18868e-16
Tfap2b	ENSRNOG00000011823	-9.30632	6.2694e-11
Entpd6	ENSRNOG00000007427	-9.28067	4.92716e-10
Ntn1	ENSRNOG00000003947	-9.27249	8.22546e-12
AABR07056503.1	ENSRNOG00000053843	-9.26961	5.64025e-11
Rpl10l	ENSRNOG00000032720	-9.19063	1.12713e-15
Fli1	ENSRNOG00000008904	-9.14765	1.30967e-21
Tram1l1	ENSRNOG00000009835	-9.13649	4.21111e-10
Npnt	ENSRNOG00000052873	-9.10539	3.65474e-14
Tesc	ENSRNOG00000001128	-9.09603	2.13651e-11
Ptprn	ENSRNOG00000019587	-9.02366	4.86689e-79
Pcnx2	ENSRNOG00000028580	-9.01734	4.28801e-11
Dok5	ENSRNOG00000013196	-9.00944	3.67267e-10
Abo3	ENSRNOG00000039906	-8.98146	1.94479e-10
Ptk7	ENSRNOG00000039976	-8.95226	4.10316e-10
Tex12	ENSRNOG00000049470	-8.93684	2.02868e-11
Sohlh2	ENSRNOG00000038091	-8.93091	2.09252e-56
Bco1	ENSRNOG00000012027	-8.92831	4.20628e-11
Eva1b	ENSRNOG00000024818	-8.91392	1.78736e-06
Aebp1	ENSRNOG00000013720	-8.86358	2.67857e-19
Pitpnm2	ENSRNOG00000029260	-8.84445	3.88459e-10
Fabp3	ENSRNOG00000012879	-8.82805	3.1628e-09
Rnf130	ENSRNOG00000046330	-8.82579	1.18204e-10
Acyp2	ENSRNOG00000042419	-8.80582	2.80507e-08
Adcy8	ENSRNOG00000004890	-8.76653	3.67104e-09
Usp9y	ENSRNOG00000058664	-8.75583	1.27289e-16
Eid2	ENSRNOG00000019310	-8.73806	9.29112e-10
Slc39a8	ENSRNOG00000012508	-8.70766	1.40799e-10
Ccnb1ip1	ENSRNOG00000026056	-8.67794	2.34172e-14
Podxl	ENSRNOG00000012495	-8.64456	3.35296e-83
Kcns3	ENSRNOG00000004899	-8.63745	1.1298e-09
Serpinb10	ENSRNOG00000002417	-8.61498	4.17888e-06
Dsc2	ENSRNOG00000039969	-8.60568	1.45258e-09
Paqr9	ENSRNOG00000032374	-8.60281	5.1399e-09
Smc1b	ENSRNOG00000032570	-8.60169	9.29504e-14
Homer2	ENSRNOG00000061450	-8.55601	7.93014e-19
Sycp3	ENSRNOG00000005270	-8.45166	1.10763e-11
Slc16a3	ENSRNOG00000036677	-8.45081	2.98647e-10
Kcnk2	ENSRNOG00000002653	-8.44699	2.89215e-27
Irx3	ENSRNOG00000011533	-8.37518	1.09808e-09
RGD1561662	ENSRNOG00000015297	-8.35557	9.41924e-06
Esam	ENSRNOG00000033217	-8.3513	1.16459e-34
Clic6	ENSRNOG00000026870	-8.28246	1.05184e-13
Bcl6b	ENSRNOG00000059956	-8.26693	2.13077e-07
Acp5	ENSRNOG00000046261	-8.26188	9.38141e-06
Rab26	ENSRNOG00000042086	-8.23655	7.23435e-08
Dmrtc2	ENSRNOG00000046142	-8.22809	0.00926916
Asz1	ENSRNOG00000060343	-8.20948	3.57327e-09
Afap1l1	ENSRNOG00000019403	-8.18845	1.48536e-24
Sytl2	ENSRNOG00000030776	-8.18621	0.00479425
Lgr5	ENSRNOG00000004221	-8.16887	2.14038e-10
Ccdc88c	ENSRNOG00000004482	-8.16463	1.15966e-30
Qsox1	ENSRNOG00000003649	-8.16123	4.48652e-11
Gata4	ENSRNOG00000010708	-8.1588	1.92722e-41
Scn5a	ENSRNOG00000015049	-8.09008	2.06242e-11
Zbtb8b	ENSRNOG00000026898	-8.02564	0.0242267
Rnf17	ENSRNOG00000008059	-8.0201	1.52856e-23
Rftn1	ENSRNOG00000011321	-8.00957	6.79235e-05
LOC689986	ENSRNOG00000047876	-8.00882	7.72328e-09
Cyp3a9	ENSRNOG00000046643	-8.00357	1.27123e-05
Cntfr	ENSRNOG00000047307	-7.98119	3.08521e-07
Tnfsf9	ENSRNOG00000045595	-7.95467	5.73852e-08
Cacng7	ENSRNOG00000056257	-7.91103	1.82121e-06
Igfbp2	ENSRNOG00000016957	-7.9058	1.86573e-05
Klhl14	ENSRNOG00000015418	-7.90187	4.85022e-08
Arhgef4	ENSRNOG00000014035	-7.86323	2.09064e-08
Prrt2	ENSRNOG00000029366	-7.83871	7.56205e-08
Fam174b	ENSRNOG00000012369	-7.81144	8.35033e-06
Aspg	ENSRNOG00000012843	-7.79951	6.18793e-09
Map10	ENSRNOG00000028652	-7.79911	1.42786e-08
Smpdl3a	ENSRNOG00000000815	-7.73384	4.21277e-06
Slc6a15	ENSRNOG00000027468	-7.72329	1.70344e-21
Clec11a	ENSRNOG00000019138	-7.72179	2.00908e-07
Slc26a9	ENSRNOG00000029514	-7.68582	2.73296e-07
Rps6ka2	ENSRNOG00000013194	-7.67842	6.06634e-08
Ptprk	ENSRNOG00000047605	-7.67423	7.00414e-08
Med12l	ENSRNOG00000010680	-7.64667	6.64289e-08
Pcdh10	ENSRNOG00000031974	-7.63335	5.32255e-10
Pla2g2a	ENSRNOG00000016945	-7.61876	2.84808e-08
Spta1	ENSRNOG00000003537	-7.58869	4.85022e-08
Plau	ENSRNOG00000010516	-7.57405	0.0126058
Il18rap	ENSRNOG00000054218	-7.5627	8.05681e-17
Cilp2	ENSRNOG00000020622	-7.53958	1.8127e-25
Cbfa2t3	ENSRNOG00000014723	-7.53092	2.53207e-07
Lama2	ENSRNOG00000011134	-7.50701	3.69952e-06
Nog	ENSRNOG00000023683	-7.48956	4.15804e-05
Mamstr	ENSRNOG00000024580	-7.48798	4.57923e-17
B3gnt9	ENSRNOG00000053895	-7.47864	4.44563e-20
Disp2	ENSRNOG00000026787	-7.47074	3.11763e-07
Frmd5	ENSRNOG00000016189	-7.46823	1.52807e-07
Prr19	ENSRNOG00000043154	-7.41903	1.57495e-09
Grem1	ENSRNOG00000026053	-7.36891	9.46888e-19
Slc38a1	ENSRNOG00000005291	-7.34779	0.000438533
Fam178b	ENSRNOG00000023941	-7.34506	4.53448e-27
Rhbg	ENSRNOG00000019412	-7.29709	4.34775e-07
Rimklb	ENSRNOG00000023814	-7.29041	1.8113e-06
Hs3st6	ENSRNOG00000014672	-7.28871	3.68361e-05
Lypd4	ENSRNOG00000020098	-7.2534	6.03018e-06
Ndn	ENSRNOG00000010146	-7.23251	6.56972e-06
Slc26a7	ENSRNOG00000006096	-7.21746	8.13419e-05
Gata1	ENSRNOG00000025534	-7.19488	0.00694965
Draxin	ENSRNOG00000008911	-7.19043	0.000533788
Prr5	ENSRNOG00000012475	-7.18325	7.02655e-07
Fam65c	ENSRNOG00000010791	-7.16784	2.19065e-07
Hormad1	ENSRNOG00000021160	-7.16048	0.000209481
Fam161a	ENSRNOG00000009881	-7.15693	3.28768e-06
Aldh3a1	ENSRNOG00000002331	-7.12209	6.50769e-28
Cftr	ENSRNOG00000055103	-7.11801	1.74491e-06
Adcy5	ENSRNOG00000002229	-7.116	9.13358e-19
Ppp2r2b	ENSRNOG00000018851	-7.0878	3.07957e-06
Tnfrsf21	ENSRNOG00000011517	-7.05463	1.28322e-27
Fgg	ENSRNOG00000025074	-7.04055	3.22105e-06
Bnc1	ENSRNOG00000019770	-6.99418	0.000486464
Zfp329	ENSRNOG00000019376	-6.98828	1.83236e-06
Tfap2a	ENSRNOG00000015522	-6.95604	2.64891e-11
Deup1	ENSRNOG00000061247	-6.95335	0.000211821
LOC102546864	ENSRNOG00000022426	-6.94625	1.47112e-09
Fam46d	ENSRNOG00000023637	-6.93637	9.29356e-06
Apc2	ENSRNOG00000033791	-6.9195	3.27304e-18
Isl1	ENSRNOG00000012556	-6.89621	8.43568e-05
F2rl1	ENSRNOG00000018003	-6.87805	4.20654e-21
Zfp955a	ENSRNOG00000048577	-6.87024	0.000485512
Serinc2	ENSRNOG00000012989	-6.84563	5.86951e-05
Fgd4	ENSRNOG00000059491	-6.83455	0.000197002
Arfgef3	ENSRNOG00000011460	-6.81624	6.25097e-05
Arhgap30	ENSRNOG00000004192	-6.74615	0.00015813
Lhx8	ENSRNOG00000028348	-6.73832	0.000457137
Cybrd1	ENSRNOG00000009620	-6.73228	2.24658e-06
Adm2	ENSRNOG00000029830	-6.71049	5.49682e-06
Dcxr	ENSRNOG00000050315	-6.70574	0.00015063
Galnt3	ENSRNOG00000005727	-6.70021	4.71859e-05
Crym	ENSRNOG00000061215	-6.68836	1.23597e-05
Adgrf5	ENSRNOG00000011154	-6.68393	2.04528e-09
LOC100909857	ENSRNOG00000015677	-6.67016	3.4288e-09
Dkk3	ENSRNOG00000016343	-6.66658	2.95548e-10
Lrrc4c	ENSRNOG00000029798	-6.64837	2.76292e-05
Cx3cl1	ENSRNOG00000016326	-6.60509	5.76604e-44
Ptpre	ENSRNOG00000015717	-6.60291	4.35731e-06
Elfn2	ENSRNOG00000007934	-6.59893	1.07498e-05
AABR07002775.1	ENSRNOG00000048489	-6.58539	0.00509368
Zfp3	ENSRNOG00000005009	-6.58226	0.000854008
Gda	ENSRNOG00000018282	-6.57609	1.07544e-10
Arhgef28	ENSRNOG00000016544	-6.56151	2.22101e-56
Il5ra	ENSRNOG00000005954	-6.55662	0.000139298
Clic3	ENSRNOG00000015184	-6.55002	0.000276978
Lmntd1	ENSRNOG00000015910	-6.54983	5.73529e-05
Rn50_8_0646.1	ENSRNOG00000053753	-6.54879	9.38363e-08
Lonrf2	ENSRNOG00000023312	-6.54406	2.77771e-06
Prss45	ENSRNOG00000029649	-6.53593	9.34528e-06
LOC102548695	ENSRNOG00000055608	-6.51181	0.000198355
LOC102553180	ENSRNOG00000048674	-6.50787	0.00153016
Rasal3	ENSRNOG00000006167	-6.49075	3.59484e-07
Prss12	ENSRNOG00000015353	-6.4831	6.31103e-51
LOC500584	ENSRNOG00000054488	-6.46863	1.08692e-10
Ccdc146	ENSRNOG00000012932	-6.46617	5.95659e-06
LOC108348189	ENSRNOG00000050582	-6.4625	0.0219368
Chst15	ENSRNOG00000016267	-6.46231	5.84538e-14
Slc22a5	ENSRNOG00000046195	-6.44589	0.000111398
Nr1h3	ENSRNOG00000013172	-6.43366	8.55446e-06
Il3ra	ENSRNOG00000001325	-6.41878	1.65507e-05
Gpr4	ENSRNOG00000016362	-6.40123	0.00452648
Nxph3	ENSRNOG00000005185	-6.39343	2.73408e-31
Muc5b	ENSRNOG00000019846	-6.38885	0.000821996
Irf6	ENSRNOG00000005082	-6.37946	0.00380556
Pcsk6	ENSRNOG00000011526	-6.35385	1.59226e-08
Etnppl	ENSRNOG00000045743	-6.34479	1.51975e-05
Pdzd2	ENSRNOG00000013140	-6.34418	1.03399e-05
LOC102557319	ENSRNOG00000038101	-6.34032	5.45051e-07
Ribc2	ENSRNOG00000033502	-6.32015	5.05606e-05
Hspa12b	ENSRNOG00000021244	-6.31418	9.05546e-08
Fgf7	ENSRNOG00000009425	-6.29677	0.00492889
Gzmbl3	ENSRNOG00000046301	-6.29365	0.00150499
AABR07006033.1	ENSRNOG00000058420	-6.27898	0.000884654
Map3k9	ENSRNOG00000007271	-6.26148	4.6517e-23
Rassf2	ENSRNOG00000021261	-6.25766	2.00036e-36
Cxxc4	ENSRNOG00000045764	-6.25412	0.00018024
Tuba3a	ENSRNOG00000032967	-6.25345	3.4983e-38
Col6a3	ENSRNOG00000019648	-6.24889	2.32275e-12
Tpd52l1	ENSRNOG00000021478	-6.24102	9.93317e-22
Nkd1	ENSRNOG00000014293	-6.23086	4.65851e-37
Rgs14	ENSRNOG00000015616	-6.21552	8.73385e-05
Pcdh9	ENSRNOG00000038068	-6.20381	3.41689e-06
Serpinb2	ENSRNOG00000002460	-6.19892	0.00036884
Zfp12	ENSRNOG00000006958	-6.19888	1.25416e-07
Dll4	ENSRNOG00000014011	-6.1878	0.000541197
Zfp541	ENSRNOG00000021800	-6.18348	5.86805e-05
Nrip3	ENSRNOG00000013290	-6.15123	1.36378e-25
Srpx2	ENSRNOG00000003715	-6.12822	1.77226e-11
Fgl2	ENSRNOG00000012881	-6.12748	1.15313e-22
Rn50_8_0651.1	ENSRNOG00000051285	-6.11084	0.000457137
Map7	ENSRNOG00000012701	-6.09796	0.000675714
Ddx60	ENSRNOG00000059097	-6.08648	7.96187e-05
Rn50_X_0752.3	ENSRNOG00000051257	-6.08297	0.00181029
Kb15	ENSRNOG00000009105	-6.07899	0.00586724
Syt15	ENSRNOG00000051688	-6.07606	0.00156555
LOC103689941	ENSRNOG00000049397	-6.04142	0.0377082
Iqgap2	ENSRNOG00000025406	-6.03586	3.93396e-10
Gpr150	ENSRNOG00000026944	-6.03163	0.001201
F3	ENSRNOG00000011800	-6.00814	4.02759e-38
Slc39a4	ENSRNOG00000014314	-5.98759	4.24099e-05
Cacnb4	ENSRNOG00000007666	-5.98565	0.000277355
Scn7a	ENSRNOG00000029342	-5.97761	0.00509368
Car6	ENSRNOG00000021355	-5.97501	0.0180327
AABR07067355.1	ENSRNOG00000057235	-5.97382	0.00131618
LOC691695	ENSRNOG00000045641	-5.92973	0.0296583
Hist3h2ba	ENSRNOG00000043419	-5.92829	7.05348e-09
Nkx2-3	ENSRNOG00000016656	-5.91853	0.00100004
Pitx1	ENSRNOG00000011423	-5.91061	0.00613744
Cpxm2	ENSRNOG00000015902	-5.91017	0.00591681
Dync1i1	ENSRNOG00000009700	-5.8992	0.00130933
Col10a1	ENSRNOG00000051399	-5.89176	0.00329216
Ttc9	ENSRNOG00000007254	-5.88547	2.62947e-14
Mmp23	ENSRNOG00000017477	-5.88327	3.66311e-12
Tex12	ENSRNOG00000038746	-5.87555	5.16333e-06
Mum1l1	ENSRNOG00000030475	-5.8666	6.42583e-25
Hykk	ENSRNOG00000013419	-5.86528	0.000444133
Mgst2	ENSRNOG00000061857	-5.86236	6.96225e-27
Vsig2	ENSRNOG00000033490	-5.8591	4.96365e-23
Rbm11	ENSRNOG00000029147	-5.85859	0.000277748
Hsf4	ENSRNOG00000015253	-5.85849	7.71631e-25
Susd4	ENSRNOG00000003562	-5.85331	0.000765101
Dnajb3	ENSRNOG00000023172	-5.84794	0.000559058
Bin2	ENSRNOG00000031930	-5.84541	1.67041e-06
Lrrn2	ENSRNOG00000009691	-5.84302	0.00313355
Il18r1	ENSRNOG00000015027	-5.83095	0.000358489
Gng11	ENSRNOG00000047914	-5.82997	2.50817e-98
Rgs16	ENSRNOG00000027024	-5.82613	0.00274323
Olfm1	ENSRNOG00000009862	-5.81949	2.39668e-11
Sox30	ENSRNOG00000006098	-5.81668	0.000377292
Lyve1	ENSRNOG00000026902	-5.81192	8.60365e-11
RGD1563349	ENSRNOG00000005818	-5.80591	0.000226868
Cyth4	ENSRNOG00000007679	-5.78679	0.00010481
Asb5	ENSRNOG00000042630	-5.78	0.00116574
Tll1	ENSRNOG00000033528	-5.77823	2.51837e-06
Postn	ENSRNOG00000012660	-5.77181	6.35841e-08
LOC100912068	ENSRNOG00000057619	-5.76985	0.00176141
Gipc3	ENSRNOG00000020593	-5.76055	0.00141296
RGD1562200	ENSRNOG00000026157	-5.74896	0.00562579
Dlx3	ENSRNOG00000004278	-5.73963	0.00422497
Pcdha4	ENSRNOG00000050378	-5.73746	9.77299e-05
Pak6	ENSRNOG00000007925	-5.72148	0.000838196
Fam25a	ENSRNOG00000055025	-5.70639	1.11751e-14
Rasd2	ENSRNOG00000014761	-5.699	0.00277783
Npr1	ENSRNOG00000014684	-5.69722	1.62312e-39
RGD1563441	ENSRNOG00000021540	-5.69523	0.000377383
RGD1560203	ENSRNOG00000045864	-5.68268	0.0360089
Kif19	ENSRNOG00000003105	-5.6797	0.0181346
Smco2	ENSRNOG00000026883	-5.67229	1.77474e-06
LOC681458	ENSRNOG00000013279	-5.65997	6.92526e-10
Mgst1	ENSRNOG00000007743	-5.65747	3.74263e-85
Adcy4	ENSRNOG00000020401	-5.64963	0.000687807
Tshz2	ENSRNOG00000048433	-5.63073	0.00119085
Lrriq1	ENSRNOG00000004564	-5.62318	0.00251302
Bbox1	ENSRNOG00000059519	-5.61608	0.0236819
Adcy7	ENSRNOG00000014776	-5.60775	0.00918275
Dhrs9	ENSRNOG00000058568	-5.58977	1.9895e-14
Cd37	ENSRNOG00000020699	-5.5821	1.39185e-08
Zdhhc23	ENSRNOG00000060348	-5.57539	0.000914182
Sgsm1	ENSRNOG00000000708	-5.56951	1.84063e-18
Prex1	ENSRNOG00000006952	-5.56166	0.000347225
LOC308990	ENSRNOG00000016978	-5.53111	0.00383018
Shisa8	ENSRNOG00000049407	-5.53065	0.0150704
Fgfr4	ENSRNOG00000016763	-5.51458	0.00626199
Tuba3b	ENSRNOG00000031707	-5.49681	8.64973e-07
Kcnk5	ENSRNOG00000047005	-5.49487	0.0106693
Cul9	ENSRNOG00000018372	-5.49164	4.78106e-22
Cd34	ENSRNOG00000045558	-5.47255	0.0421121
Hspa12a	ENSRNOG00000018019	-5.46635	9.50135e-08
Mboat2	ENSRNOG00000061050	-5.46068	1.674e-11
Lpl	ENSRNOG00000012181	-5.45671	0.0226873
Klf12	ENSRNOG00000009145	-5.44807	6.41811e-16
Shc2	ENSRNOG00000008030	-5.44697	9.45004e-05
Cox6a2	ENSRNOG00000019851	-5.41749	0.0120462
Kcnip4	ENSRNOG00000032350	-5.40468	0.0469157
LOC100362783	ENSRNOG00000046006	-5.39868	0.00784656
Cldn18	ENSRNOG00000030386	-5.39652	4.08407e-08
Lrrc17	ENSRNOG00000012817	-5.37801	0.00779711
Rab27b	ENSRNOG00000012176	-5.3699	2.83072e-07
Adamtsl3	ENSRNOG00000010840	-5.36008	5.38242e-25
Rab19	ENSRNOG00000009030	-5.35952	0.016882
Evi2a	ENSRNOG00000022764	-5.35613	6.35841e-08
Veph1	ENSRNOG00000012427	-5.34098	7.93014e-19
St3gal6	ENSRNOG00000001653	-5.3376	0.00226637
Sat2	ENSRNOG00000011714	-5.33477	0.0245027
Foxp2	ENSRNOG00000054508	-5.33068	4.07642e-16
LOC100360856	ENSRNOG00000048686	-5.32745	0.0427027
Slc17a6	ENSRNOG00000016147	-5.32411	0.0032262
Zfp521	ENSRNOG00000016874	-5.32029	0.0289907
Erg	ENSRNOG00000001652	-5.30778	6.69826e-22
Ehhadh	ENSRNOG00000001770	-5.29701	0.00206899
Mks1	ENSRNOG00000008635	-5.29436	1.27098e-06
Nrg2	ENSRNOG00000019093	-5.29275	0.00892701
Gata2	ENSRNOG00000012347	-5.28619	0.000172779
AABR07006032.1	ENSRNOG00000055996	-5.28321	0.0350781
Dner	ENSRNOG00000016640	-5.26957	3.69291e-05
Lyz2	ENSRNOG00000005825	-5.26901	0.000496423
Lcp1	ENSRNOG00000010319	-5.26446	0.00223948
Hvcn1	ENSRNOG00000001270	-5.24864	0.000481033
Ddit4l	ENSRNOG00000010047	-5.23882	0.00671256
Spop	ENSRNOG00000004686	-5.23652	9.49611e-43
Fstl3	ENSRNOG00000009311	-5.2287	4.39389e-11
LOC102555023	ENSRNOG00000022163	-5.22118	0.00624715
Slc16a11	ENSRNOG00000018748	-5.17116	0.00185686
Stox1	ENSRNOG00000023712	-5.13259	0.00382534
Mal	ENSRNOG00000015445	-5.13075	0.000433252
Camk1d	ENSRNOG00000017882	-5.13062	2.42624e-68
St6galnac2	ENSRNOG00000012083	-5.12903	0.00887523
Cbln2	ENSRNOG00000013654	-5.12795	0.0217856
Aff3	ENSRNOG00000018830	-5.12676	1.00437e-06
Fbxo44	ENSRNOG00000009298	-5.11253	0.0227
Clmn	ENSRNOG00000011044	-5.08956	0.0427253
LOC100912034	ENSRNOG00000050469	-5.08925	3.38663e-09
Tspan8	ENSRNOG00000004411	-5.08638	0.00750732
Hmcn1	ENSRNOG00000028627	-5.08102	0.0197862
LOC498759	ENSRNOG00000050687	-5.07588	0.0288597
Rap1gap	ENSRNOG00000013825	-5.07582	0.00373264
Rn50_8_0647.2	ENSRNOG00000051221	-5.07113	0.0161194
AABR07044167.1	ENSRNOG00000051801	-5.06379	0.00927826
Adamts16	ENSRNOG00000016812	-5.06068	0.0164964
Itga9	ENSRNOG00000043167	-5.05853	1.20684e-23
Csprs	ENSRNOG00000017256	-5.03747	0.00552099
Pappa2	ENSRNOG00000042860	-5.03023	0.00620459
AABR07050423.1	ENSRNOG00000054302	-5.02681	0.0175706
Manba	ENSRNOG00000052247	-5.0132	5.56265e-40
Klf5	ENSRNOG00000008785	-5.01158	0.000144375
Akr7a3	ENSRNOG00000017899	-5.0094	0.0144817
Cfh	ENSRNOG00000030715	-5.00772	0.000217929
Eya4	ENSRNOG00000016627	-5.00694	0.0421047
Epb41l4a	ENSRNOG00000026050	-5.00213	1.03238e-20
Trpm2	ENSRNOG00000001216	-4.99942	0.0362312
Srrm3	ENSRNOG00000001439	-4.99107	0.0273821
Nefh	ENSRNOG00000008716	-4.97886	0.0138543
LOC690700	ENSRNOG00000046536	-4.96744	0.0283266
Slc9a2	ENSRNOG00000015567	-4.96233	0.0199649
Svip	ENSRNOG00000037137	-4.96043	1.15431e-10
AABR07012065.1	ENSRNOG00000056112	-4.95664	0.0093829
Sncaip	ENSRNOG00000018254	-4.9554	0.0262662
Kcnk1	ENSRNOG00000019937	-4.95244	0.00281661
Fbln7	ENSRNOG00000017550	-4.95131	2.24435e-15
Myom3	ENSRNOG00000032994	-4.9459	0.0261937
Wnt2	ENSRNOG00000051905	-4.94491	0.0381644
AABR07001591.1	ENSRNOG00000051938	-4.94437	0.00666508
Gbp5	ENSRNOG00000032240	-4.94235	1.05859e-13
Adamtsl2	ENSRNOG00000027742	-4.93538	0.00237235
Prr5l	ENSRNOG00000004666	-4.92807	0.0045839
Gfi1	ENSRNOG00000002042	-4.92289	6.58566e-11
Nptx1	ENSRNOG00000003741	-4.92042	1.55379e-06
Stc2	ENSRNOG00000020729	-4.91938	1.43173e-06
Lbx1	ENSRNOG00000025520	-4.90363	0.04669
Slc9b1	ENSRNOG00000042985	-4.89271	2.89916e-07
Hnf4g	ENSRNOG00000008971	-4.89032	0.0135843
Mdfi	ENSRNOG00000014987	-4.88877	8.08684e-20
Anxa10	ENSRNOG00000014339	-4.88838	0.00540565
Erc2	ENSRNOG00000015148	-4.88477	0.0100966
Lzts1	ENSRNOG00000011826	-4.88285	0.0169611
Adgrd1	ENSRNOG00000023536	-4.87813	7.42824e-31
Gpr75	ENSRNOG00000022176	-4.86359	1.65976e-07
Lrp3	ENSRNOG00000011451	-4.86002	0.0179845
Mpp7	ENSRNOG00000018760	-4.85858	0.00343699
Ccbe1	ENSRNOG00000024536	-4.85589	0.00927053
Gpc3	ENSRNOG00000060179	-4.8536	4.16354e-05
Trim69	ENSRNOG00000017157	-4.84721	1.33278e-07
Mrgpre	ENSRNOG00000054917	-4.8333	0.0102375
Hic1	ENSRNOG00000046405	-4.82998	3.02446e-07
Crabp2	ENSRNOG00000022101	-4.81152	2.58039e-12
Atoh8	ENSRNOG00000010716	-4.81014	6.29134e-32
Pla2g16	ENSRNOG00000021206	-4.80944	0.00652176
Rac2	ENSRNOG00000007350	-4.80847	0.0369854
Sprr1a	ENSRNOG00000024028	-4.80715	2.11972e-06
Fam110c	ENSRNOG00000005660	-4.80667	0.0126442
Dmrt2	ENSRNOG00000016301	-4.80651	1.25078e-05
Sema3e	ENSRNOG00000006631	-4.8054	8.11567e-12
Il1rl2	ENSRNOG00000014683	-4.80092	0.00262526
Sp9	ENSRNOG00000028187	-4.79535	7.04796e-16
Adcyap1r1	ENSRNOG00000012098	-4.78849	0.00820689
Epsti1	ENSRNOG00000009471	-4.78378	0.00721701
Mpp3	ENSRNOG00000033653	-4.77544	0.000235951
Plek2	ENSRNOG00000010098	-4.75909	0.039325
Pllp	ENSRNOG00000016558	-4.75533	0.0238022
Rnf144b	ENSRNOG00000016123	-4.74405	1.69667e-25
Jmjd8	ENSRNOG00000019729	-4.7242	1.5274e-37
Cyb561	ENSRNOG00000007433	-4.72366	0.00540107
Bmp7	ENSRNOG00000053384	-4.71408	0.0238237
Macc1	ENSRNOG00000037436	-4.71376	0.0164789
Parvb	ENSRNOG00000055305	-4.70899	1.05196e-33
Trpv4	ENSRNOG00000001195	-4.7049	3.29628e-08
LOC100360908	ENSRNOG00000043249	-4.70154	0.0314724
Ptges	ENSRNOG00000006320	-4.70121	0.000204384
Pnma1	ENSRNOG00000010553	-4.69375	3.02668e-06
Mcoln2	ENSRNOG00000015089	-4.68935	0.022111
Spata13	ENSRNOG00000013707	-4.6818	4.54254e-11
Syt4	ENSRNOG00000017333	-4.67012	0.0306372
Syce2	ENSRNOG00000003279	-4.66966	1.50777e-07
Vwa1	ENSRNOG00000018338	-4.66932	7.22681e-14
Ociad2	ENSRNOG00000002196	-4.66438	0.000267735
Igsf9	ENSRNOG00000008054	-4.66313	4.03202e-11
Slc37a1	ENSRNOG00000001169	-4.66259	0.0103911
Slc6a2	ENSRNOG00000016311	-4.64749	0.00654862
Epb41l3	ENSRNOG00000016724	-4.64524	0.00726618
Tlr2	ENSRNOG00000009822	-4.64497	8.91967e-20
Tifa	ENSRNOG00000010941	-4.64131	6.63881e-06
Sfrp2	ENSRNOG00000009465	-4.62136	5.24205e-07
Hs3st1	ENSRNOG00000010598	-4.61398	5.56281e-09
Cercam	ENSRNOG00000026604	-4.61028	7.11733e-55
Ddx43	ENSRNOG00000050868	-4.60961	6.36374e-12
Gprc5b	ENSRNOG00000016013	-4.60926	3.28902e-64
Cyp11a1	ENSRNOG00000008074	-4.59525	0.0430252
Dgki	ENSRNOG00000026705	-4.59265	4.91521e-06
Pcbd1	ENSRNOG00000000566	-4.58998	0.0278537
Rundc3b	ENSRNOG00000008463	-4.58398	0.000138829
Sema3a	ENSRNOG00000023337	-4.58242	0.000279416
LOC691083	ENSRNOG00000013437	-4.57649	4.36405e-05
Gzmb	ENSRNOG00000049976	-4.57546	0.017247
Lrp2	ENSRNOG00000056184	-4.57196	1.07348e-08
Matn4	ENSRNOG00000014021	-4.56668	1.71005e-07
Vill	ENSRNOG00000011446	-4.56309	4.98226e-05
Olfml2a	ENSRNOG00000014034	-4.55935	1.82551e-26
Fbxl2	ENSRNOG00000027099	-4.55173	2.84816e-05
Rab11fip4	ENSRNOG00000014135	-4.54379	0.000767091
Pkd1l2	ENSRNOG00000045626	-4.53824	0.00261767
Cdkn1c	ENSRNOG00000059500	-4.53708	0.0296499
Insrr	ENSRNOG00000057702	-4.53512	0.0493012
Ltbp2	ENSRNOG00000012094	-4.52923	4.42688e-89
Ptpn20	ENSRNOG00000020203	-4.52015	2.91521e-08
Serinc5	ENSRNOG00000024039	-4.51895	1.49684e-37
Pamr1	ENSRNOG00000005348	-4.51523	0.020695
Syt8	ENSRNOG00000020245	-4.50731	0.0263863
Sorcs1	ENSRNOG00000011313	-4.49061	0.00152706
Boc	ENSRNOG00000002041	-4.47663	2.98845e-08
RGD1306556	ENSRNOG00000052424	-4.46722	2.53795e-136
Ndnf	ENSRNOG00000006857	-4.46335	0.0158519
Htra3	ENSRNOG00000008182	-4.46001	2.791e-07
Golm1	ENSRNOG00000018400	-4.45898	3.18565e-13
RGD1563159	ENSRNOG00000042727	-4.45424	0.0144438
Epb41l4b	ENSRNOG00000056550	-4.44263	0.0483564
Ebpl	ENSRNOG00000014659	-4.43934	5.12611e-22
Gng4	ENSRNOG00000047080	-4.43586	0.00012392
Podnl1	ENSRNOG00000006741	-4.43054	5.67322e-09
PCOLCE2	ENSRNOG00000046848	-4.42067	2.55918e-27
RGD1309651	ENSRNOG00000017646	-4.42054	0.0459913
Ephb2	ENSRNOG00000012531	-4.42039	5.29859e-12
Serpine2	ENSRNOG00000015461	-4.41468	3.02219e-06
Apol3	ENSRNOG00000042771	-4.41318	1.92049e-17
Itgax	ENSRNOG00000036703	-4.38613	0.00203932
Myh3	ENSRNOG00000046276	-4.38559	0.0091485
Sdk1	ENSRNOG00000001103	-4.36453	1.01826e-08
MGC105649	ENSRNOG00000050251	-4.36399	1.70581e-44
Syce1	ENSRNOG00000024073	-4.3635	0.0388617
Sept1	ENSRNOG00000017804	-4.3604	0.0213777
Fbln1	ENSRNOG00000014137	-4.35319	0.00168269
Clca4l	ENSRNOG00000036877	-4.34782	0.0448393
Cux2	ENSRNOG00000001259	-4.34044	0.0103692
Aldh8a1	ENSRNOG00000014907	-4.33922	1.68697e-07
Gnat2	ENSRNOG00000019296	-4.31455	0.0130815
Klhl36	ENSRNOG00000016422	-4.31337	2.2336e-07
Pla1a	ENSRNOG00000057153	-4.31246	3.32221e-09
Helz2	ENSRNOG00000013267	-4.29759	1.89694e-05
Foxq1	ENSRNOG00000021752	-4.29664	0.0152157
Susd5	ENSRNOG00000026951	-4.28711	2.62e-39
Ngef	ENSRNOG00000016653	-4.27219	4.46921e-41
Itih2	ENSRNOG00000001066	-4.27051	0.00175974
Fam124a	ENSRNOG00000009802	-4.26559	3.83605e-05
Esm1	ENSRNOG00000010797	-4.26553	9.49196e-07
Pnldc1	ENSRNOG00000023140	-4.25388	2.45628e-24
Rgs2	ENSRNOG00000003687	-4.25279	7.8178e-11
Gch1	ENSRNOG00000011039	-4.24847	0.000910352
Atp10b	ENSRNOG00000003781	-4.24133	0.0128456
Ankrd6	ENSRNOG00000007110	-4.24002	0.000109766
Sgip1	ENSRNOG00000006357	-4.23547	8.68191e-06
Nfkbid	ENSRNOG00000025111	-4.234	1.08694e-06
Sh2d3c	ENSRNOG00000054560	-4.23249	0.0470714
Srrm4	ENSRNOG00000001141	-4.23069	0.0170985
Rasip1	ENSRNOG00000021004	-4.22997	1.69498e-15
Smagp	ENSRNOG00000048932	-4.1991	2.8751e-21
Miga1	ENSRNOG00000056332	-4.19776	0.0373822
Klhl40	ENSRNOG00000019390	-4.1933	0.000193213
Tmem176a	ENSRNOG00000023708	-4.19289	0.0138287
Rorb	ENSRNOG00000013413	-4.19139	0.0354872
Ppl	ENSRNOG00000002930	-4.18281	7.83345e-07
RT1-CE1	ENSRNOG00000050183	-4.17717	1.97968e-13
Kcng1	ENSRNOG00000054314	-4.17485	6.50198e-12
Tshr	ENSRNOG00000003972	-4.16754	0.000236585
Tnfsf10	ENSRNOG00000013269	-4.16578	0.0304711
Map4k1	ENSRNOG00000020505	-4.16453	2.42917e-24
Plekhg1	ENSRNOG00000016011	-4.16217	1.38867e-10
Hoxb8	ENSRNOG00000007585	-4.15383	0.0494866
Nrip2	ENSRNOG00000042939	-4.15124	0.0428335
Clic5	ENSRNOG00000047218	-4.15078	4.82315e-22
Ccdc125	ENSRNOG00000027410	-4.14398	2.43806e-17
Tjp3	ENSRNOG00000020501	-4.13698	4.40125e-11
Wasf3	ENSRNOG00000048898	-4.13116	0.00134461
Ptprr	ENSRNOG00000004483	-4.12536	0.0150541
Abcb9	ENSRNOG00000001082	-4.11832	0.00173194
Procr	ENSRNOG00000019330	-4.10938	2.12917e-15
Cpa2	ENSRNOG00000028092	-4.09859	0.025121
Ackr4	ENSRNOG00000011478	-4.08615	8.55446e-06
Tbx15	ENSRNOG00000019565	-4.07723	1.13782e-53
Megf10	ENSRNOG00000013674	-4.07609	0.00694739
Upk1a	ENSRNOG00000024331	-4.0714	0.00370644
Cdhr1	ENSRNOG00000013330	-4.06988	1.41737e-16
Foxo6	ENSRNOG00000032639	-4.06925	1.61114e-18
Ramp1	ENSRNOG00000019926	-4.06837	8.98289e-06
Scn1a	ENSRNOG00000053122	-4.0607	6.72312e-09
Mov10l1	ENSRNOG00000031093	-4.05912	0.00070378
Eml5	ENSRNOG00000004207	-4.0353	0.000104583
Ly6k	ENSRNOG00000025725	-4.02496	0.00018752
Dlk2	ENSRNOG00000018949	-4.02354	0.00211462
Psd4	ENSRNOG00000006079	-4.0216	0.00228582
Ephb4	ENSRNOG00000045952	-4.02115	9.57046e-13
Lurap1	ENSRNOG00000023459	-4.0148	0.000293019
Slc16a6	ENSRNOG00000000245	-4.00738	0.0102129
Nrg1	ENSRNOG00000010392	-4.00668	9.49506e-18
Pde4a	ENSRNOG00000020828	-4.0022	4.92867e-35
Rnf212	ENSRNOG00000059010	-3.99497	0.00995458
Nlrp4	ENSRNOG00000021996	-3.97671	1.72421e-23
Arsg	ENSRNOG00000003931	-3.95713	1.31922e-05
Sox6	ENSRNOG00000020514	-3.94903	0.000274952
Ptgfr	ENSRNOG00000046468	-3.94683	0.0401995
Rasl10a	ENSRNOG00000008951	-3.92497	0.00433033
Tp53i3	ENSRNOG00000005177	-3.91223	0.0466305
Creld1	ENSRNOG00000009414	-3.90991	2.02007e-58
Otog	ENSRNOG00000010983	-3.90918	7.52888e-05
Ppp2r2c	ENSRNOG00000058202	-3.90114	1.33932e-24
Pkp2	ENSRNOG00000001825	-3.89654	3.10063e-07
Naa11	ENSRNOG00000002031	-3.89571	0.00568207
LOC100912642	ENSRNOG00000042224	-3.88977	0.000372211
Tigd4	ENSRNOG00000010741	-3.88933	0.00582718
Gxylt2	ENSRNOG00000005621	-3.86622	0.0301758
Gucy2g	ENSRNOG00000015724	-3.85796	0.0295457
Cox4i2	ENSRNOG00000007827	-3.84948	0.0372063
Kcnmb4	ENSRNOG00000054458	-3.8474	1.19085e-09
C5ar2	ENSRNOG00000049028	-3.84708	2.52936e-06
Mybpc3	ENSRNOG00000012307	-3.84588	0.0284854
Rpl39l	ENSRNOG00000032300	-3.8431	3.84092e-23
Synpo2	ENSRNOG00000014867	-3.84135	7.5527e-11
Dok6	ENSRNOG00000038190	-3.83562	0.0434062
Fmo1	ENSRNOG00000034191	-3.81818	0.0465989
Card10	ENSRNOG00000008401	-3.81411	1.44192e-17
Car9	ENSRNOG00000017073	-3.79653	2.31005e-49
Oplah	ENSRNOG00000011781	-3.79397	9.09471e-36
Cpne7	ENSRNOG00000015397	-3.78027	4.51877e-14
Klf8	ENSRNOG00000039057	-3.77944	0.0426194
Klhl41	ENSRNOG00000007461	-3.77806	0.000649626
Tfcp2l1	ENSRNOG00000002414	-3.77091	0.000162272
Rragd	ENSRNOG00000007331	-3.76084	2.52062e-05
Fat3	ENSRNOG00000011585	-3.76065	1.65507e-05
Ngfr	ENSRNOG00000005392	-3.75527	0.000135267
Slco5a1	ENSRNOG00000008966	-3.74981	0.000189263
Angpt4	ENSRNOG00000005008	-3.74074	0.00278738
Cmpk2	ENSRNOG00000007690	-3.73894	1.39548e-09
Htr1b	ENSRNOG00000013042	-3.73068	5.41949e-07
LOC103691013	ENSRNOG00000050511	-3.73053	0.00333251
Tspan12	ENSRNOG00000059016	-3.73011	0.0186361
Kcnq5	ENSRNOG00000013781	-3.72022	1.17905e-18
Msrb2	ENSRNOG00000016873	-3.71988	0.000108161
Bdkrb1	ENSRNOG00000004488	-3.71087	0.000632464
Zfp185	ENSRNOG00000051704	-3.71053	0.0220647
Tspan2	ENSRNOG00000023338	-3.70853	9.02009e-33
Stap2	ENSRNOG00000047306	-3.69482	1.23611e-13
Tex101	ENSRNOG00000020057	-3.68319	6.24925e-24
Hs3st5	ENSRNOG00000000605	-3.68056	0.0126805
Il1rl1	ENSRNOG00000014835	-3.67791	3.20309e-26
Nup210	ENSRNOG00000005390	-3.67163	0.000253659
Oas2	ENSRNOG00000049282	-3.66529	0.0480281
Uba7	ENSRNOG00000029195	-3.64457	5.77612e-13
Clec10a	ENSRNOG00000018715	-3.64312	0.0299628
Asic4	ENSRNOG00000019985	-3.64005	0.0402719
AABR07024203.1	ENSRNOG00000051594	-3.62628	0.00923563
LOC691485	ENSRNOG00000013097	-3.62135	0.00905646
Cited1	ENSRNOG00000003189	-3.62079	9.34685e-08
Lhfpl2	ENSRNOG00000011032	-3.60828	8.51961e-14
Ccnd2	ENSRNOG00000057710	-3.60029	7.98426e-06
Rem1	ENSRNOG00000007567	-3.59923	0.0329679
RGD1561161	ENSRNOG00000039582	-3.5914	2.54279e-06
Klc3	ENSRNOG00000018101	-3.587	0.00762936
Gdf10	ENSRNOG00000051993	-3.57811	0.000769338
Mfrp	ENSRNOG00000039107	-3.57396	0.000167823
Pitpnm3	ENSRNOG00000008323	-3.56341	3.9406e-09
Fgd3	ENSRNOG00000016225	-3.55358	0.0234865
Map2	ENSRNOG00000011841	-3.55088	6.77646e-14
Nat14	ENSRNOG00000042414	-3.54934	1.91123e-11
Serpinb1a	ENSRNOG00000016581	-3.54415	7.45538e-16
Pip5k1b	ENSRNOG00000015232	-3.52732	2.30219e-06
Sgcg	ENSRNOG00000014603	-3.52461	1.94677e-15
Apln	ENSRNOG00000003984	-3.51605	1.50777e-07
Mgat4a	ENSRNOG00000018276	-3.51519	0.00537251
Hmx2	ENSRNOG00000020638	-3.49199	4.26745e-05
Syn1	ENSRNOG00000010365	-3.48848	6.94533e-13
Tmem176b	ENSRNOG00000008465	-3.48146	0.00020873
Maf	ENSRNOG00000012428	-3.47793	0.016217
Cadm4	ENSRNOG00000024243	-3.4751	1.62312e-39
Lsr	ENSRNOG00000021053	-3.47227	0.0191499
Mmp2	ENSRNOG00000016695	-3.47021	1.25186e-22
Meox1	ENSRNOG00000020803	-3.46894	0.0417895
Sgcd	ENSRNOG00000002372	-3.46054	0.00467959
Bhlhe41	ENSRNOG00000048961	-3.45782	2.05366e-12
Hmga2	ENSRNOG00000042460	-3.45153	9.67767e-13
Hr	ENSRNOG00000011427	-3.44963	3.74707e-20
Ms4a14	ENSRNOG00000025805	-3.44028	0.00564097
Ryr1	ENSRNOG00000020557	-3.43969	7.71853e-07
Tox	ENSRNOG00000010777	-3.43708	0.0427009
Hsh2d	ENSRNOG00000023614	-3.43422	0.0306747
Pdgfb	ENSRNOG00000017197	-3.43132	0.000150315
Eva1a	ENSRNOG00000007118	-3.42265	4.99387e-09
Ankmy1	ENSRNOG00000048567	-3.42247	9.85023e-05
Coro2a	ENSRNOG00000008901	-3.40553	0.0444491
Aqp1	ENSRNOG00000011648	-3.38636	3.35329e-155
Scarf1	ENSRNOG00000059618	-3.36516	1.17143e-10
AABR07031734.3	ENSRNOG00000042376	-3.36058	0.00120029
Slc2a6	ENSRNOG00000005900	-3.35579	5.12122e-28
Ramp3	ENSRNOG00000053766	-3.34471	0.000203111
Fam58b	ENSRNOG00000022582	-3.34202	1.38048e-13
Fam107a	ENSRNOG00000033261	-3.32588	0.00176105
Slc24a1	ENSRNOG00000052051	-3.32385	0.0286779
Abcg2	ENSRNOG00000007041	-3.29854	3.37193e-09
AABR07068587.1	ENSRNOG00000057499	-3.29407	0.0281959
Irf8	ENSRNOG00000017869	-3.28601	3.55593e-27
Cd109	ENSRNOG00000025332	-3.28536	6.63263e-05
Dsp	ENSRNOG00000013928	-3.27733	2.65879e-09
Scx	ENSRNOG00000021812	-3.2753	6.95492e-15
Irf5	ENSRNOG00000007437	-3.27219	4.86372e-38
Naprt	ENSRNOG00000007939	-3.26816	0.000867831
Kcnk12	ENSRNOG00000016110	-3.26094	0.0239373
Prkch	ENSRNOG00000004873	-3.24611	5.25902e-05
Cap2	ENSRNOG00000043350	-3.24567	5.78449e-09
Foxa1	ENSRNOG00000009284	-3.23323	0.000129902
Aldh1l1	ENSRNOG00000047023	-3.23322	0.0430099
Prph	ENSRNOG00000052880	-3.23221	0.00064676
Tmem141	ENSRNOG00000028254	-3.22158	3.91134e-09
Exo5	ENSRNOG00000037432	-3.20833	3.55494e-16
Thbs2	ENSRNOG00000010529	-3.20322	4.29144e-11
AABR07033887.1	ENSRNOG00000045728	-3.20142	1.11902e-07
Slc2a13	ENSRNOG00000015741	-3.19913	6.43203e-06
Pcdhgb7	ENSRNOG00000039454	-3.19812	0.00176105
Mreg	ENSRNOG00000015774	-3.19727	0.0050477
Gpr153	ENSRNOG00000010718	-3.18445	5.76344e-13
Kif21a	ENSRNOG00000014844	-3.18394	9.93806e-29
Oas1a	ENSRNOG00000001369	-3.18298	1.01722e-08
Ccdc106	ENSRNOG00000015997	-3.17582	4.10703e-08
RGD1561157	ENSRNOG00000042258	-3.17097	7.0121e-09
Adamts5	ENSRNOG00000057794	-3.16489	0.00887535
Fam49a	ENSRNOG00000052758	-3.15871	3.68144e-08
Rsad2	ENSRNOG00000007539	-3.15319	0.00935464
Exoc3l2	ENSRNOG00000017448	-3.14733	2.11798e-21
Cdkn3	ENSRNOG00000009785	-3.12555	1.30332e-31
Serpinb8	ENSRNOG00000002396	-3.12399	3.20748e-16
Lctl	ENSRNOG00000009193	-3.12163	0.000643892
Murc	ENSRNOG00000008027	-3.12162	5.64554e-41
Cpz	ENSRNOG00000008947	-3.11282	0.0382019
RGD1309350	ENSRNOG00000048275	-3.11063	0.0157695
Phf11b	ENSRNOG00000053891	-3.09901	0.000163093
Krt8	ENSRNOG00000009779	-3.09612	0.0110445
Gatsl3	ENSRNOG00000006740	-3.09409	0.00185686
Ap1g2	ENSRNOG00000025619	-3.09211	2.13211e-33
Erbb4	ENSRNOG00000014248	-3.08897	0.000478858
Nudt17	ENSRNOG00000037217	-3.08472	0.00795245
Nlrc5	ENSRNOG00000048222	-3.08415	3.65944e-05
Enpp3	ENSRNOG00000013791	-3.08333	0.00847957
Sox9	ENSRNOG00000002607	-3.07846	1.37275e-14
Stxbp2	ENSRNOG00000000994	-3.0735	4.63623e-14
Nox4	ENSRNOG00000013925	-3.07302	9.17451e-06
Scml2	ENSRNOG00000003726	-3.07198	3.74541e-16
Ogfrl1	ENSRNOG00000014142	-3.07154	8.06058e-31
Tm6sf2	ENSRNOG00000042237	-3.06062	0.00114359
Car12	ENSRNOG00000017766	-3.05657	0.000978107
Ampd3	ENSRNOG00000018262	-3.05635	2.14078e-06
Crybg3	ENSRNOG00000001687	-3.05566	1.64062e-09
Slfn5	ENSRNOG00000021719	-3.05485	2.40075e-28
RGD1310587	ENSRNOG00000002322	-3.04652	1.64388e-21
Nfatc4	ENSRNOG00000020482	-3.04549	3.85683e-12
Tmc7	ENSRNOG00000016679	-3.04066	0.0193939
Golga4	ENSRNOG00000029910	-3.03899	1.69105e-63
Adamts8	ENSRNOG00000005574	-3.0372	4.90875e-10
Clca2	ENSRNOG00000013771	-3.03232	0.0163641
Ptchd3	ENSRNOG00000046946	-3.02462	3.11671e-05
Tspan13	ENSRNOG00000005046	-3.02352	7.32686e-31
Tex19.1	ENSRNOG00000036670	-3.02257	0.00209141
Fbln2	ENSRNOG00000007338	-3.01845	0.000478858
Kcnf1	ENSRNOG00000024310	-3.01312	0.00312208
Hgf	ENSRNOG00000007027	-3.0092	1.35651e-13
Zfp354c	ENSRNOG00000029205	-3.00752	8.00893e-13
Bach2	ENSRNOG00000006170	-3.00697	2.15005e-11
Pax8	ENSRNOG00000026203	-3.00411	0.00757206
Fzd4	ENSRNOG00000016848	-3.00178	6.41055e-17
Foxn1	ENSRNOG00000010870	-2.99884	0.00865753
Mylip	ENSRNOG00000017579	-2.99817	8.51093e-10
Dapp1	ENSRNOG00000010575	-2.99541	4.92716e-10
F11r	ENSRNOG00000004414	-2.98085	1.11902e-05
Zswim5	ENSRNOG00000018160	-2.97343	2.82506e-06
AABR07050646.1	ENSRNOG00000053592	-2.96699	0.0159625
Cd55	ENSRNOG00000003927	-2.96627	3.20466e-22
Acpp	ENSRNOG00000011820	-2.95741	0.0300103
Tnfrsf10b	ENSRNOG00000038483	-2.95232	3.52269e-15
Celsr1	ENSRNOG00000021285	-2.93938	8.0539e-07
Stx3	ENSRNOG00000021013	-2.93909	1.46584e-20
Mx2	ENSRNOG00000001963	-2.93542	3.67498e-09
Lmod3	ENSRNOG00000032443	-2.93116	0.034282
Ripk4	ENSRNOG00000001618	-2.92416	0.0334801
Loxl4	ENSRNOG00000015727	-2.9224	2.54447e-19
Icam2	ENSRNOG00000025143	-2.92101	0.00122201
Abhd15	ENSRNOG00000015002	-2.91965	2.51108e-06
Cacna1a	ENSRNOG00000052707	-2.91847	6.64296e-10
Il20rb	ENSRNOG00000023214	-2.91481	7.259e-05
Usp18	ENSRNOG00000037198	-2.90483	5.7331e-12
Grm1	ENSRNOG00000014290	-2.90448	0.00238509
Fam105a	ENSRNOG00000012109	-2.90321	1.0464e-11
Vipr2	ENSRNOG00000004317	-2.89139	4.20471e-05
Paqr5	ENSRNOG00000014164	-2.88406	0.0286337
Ptgr1	ENSRNOG00000015072	-2.87692	7.73283e-29
Dnajc6	ENSRNOG00000052887	-2.87645	1.38807e-11
Ptpn18	ENSRNOG00000013415	-2.8717	0.00663492
AABR07040840.1	ENSRNOG00000060899	-2.86665	0.00664003
Cnih2	ENSRNOG00000020247	-2.8635	1.09649e-19
Ptgir	ENSRNOG00000016756	-2.85008	1.69125e-10
Id2	ENSRNOG00000007237	-2.84642	4.82321e-13
Tmem169	ENSRNOG00000016091	-2.84582	0.00189253
Thnsl1	ENSRNOG00000033076	-2.84413	1.97424e-08
Cd38	ENSRNOG00000003069	-2.83831	0.000204384
Fibin	ENSRNOG00000004699	-2.83185	5.56204e-06
Ano1	ENSRNOG00000020865	-2.82662	2.09764e-12
AABR07009931.1	ENSRNOG00000011640	-2.82427	0.00189367
Crybb1	ENSRNOG00000047653	-2.81579	0.0045103
Fam102b	ENSRNOG00000027540	-2.81102	7.81108e-11
Greb1l	ENSRNOG00000023492	-2.80668	1.6488e-07
Cgnl1	ENSRNOG00000054080	-2.80632	4.66132e-13
C3ar1	ENSRNOG00000009211	-2.79196	0.00979232
Mylpf	ENSRNOG00000017645	-2.79081	0.0267664
Armc2	ENSRNOG00000026217	-2.78741	0.0128836
Lrrn4cl	ENSRNOG00000026302	-2.77549	0.00593419
Vash2	ENSRNOG00000003832	-2.77268	2.27813e-09
Tmem56	ENSRNOG00000025160	-2.77021	0.00503546
Pdgfd	ENSRNOG00000029148	-2.76893	0.0276913
Rn50_13_0828.1	ENSRNOG00000049537	-2.76799	2.40529e-45
Ndst3	ENSRNOG00000015781	-2.75888	5.55699e-09
Steap2	ENSRNOG00000006076	-2.75884	1.10304e-18
Srgap3	ENSRNOG00000006509	-2.75296	1.5139e-15
Piwil2	ENSRNOG00000009871	-2.74901	2.57089e-10
Lama3	ENSRNOG00000011300	-2.74374	1.11963e-15
Pla2g5	ENSRNOG00000016838	-2.74368	7.57396e-11
Prodh1	ENSRNOG00000000281	-2.73797	0.012566
Has2	ENSRNOG00000004854	-2.73155	7.69539e-06
Jak3	ENSRNOG00000018669	-2.72927	9.12156e-26
Kcnn1	ENSRNOG00000029264	-2.72749	2.27729e-07
Met	ENSRNOG00000052745	-2.71888	0.000242178
Abca16	ENSRNOG00000015783	-2.71792	0.00664611
Sh3bgrl2	ENSRNOG00000009613	-2.70984	0.00926916
Camk2n1	ENSRNOG00000016322	-2.70658	1.87277e-11
Nkx1-2	ENSRNOG00000017006	-2.70356	0.0231443
Proser2	ENSRNOG00000045553	-2.6958	1.93003e-07
Irs3	ENSRNOG00000001389	-2.69475	0.0229645
Dnai2	ENSRNOG00000024523	-2.69384	1.01722e-08
Me3	ENSRNOG00000017311	-2.69083	0.00169252
Zfhx2	ENSRNOG00000025634	-2.69005	3.16636e-05
Azin2	ENSRNOG00000051507	-2.68747	5.00448e-07
Ldhb	ENSRNOG00000013000	-2.68546	4.6382e-30
Igsf3	ENSRNOG00000023851	-2.68401	4.97402e-45
Adcy3	ENSRNOG00000003999	-2.67831	1.94226e-05
Nqo2	ENSRNOG00000017820	-2.67282	2.19275e-06
Cd1d1	ENSRNOG00000016451	-2.66721	1.55532e-09
Npw	ENSRNOG00000012390	-2.66667	1.30063e-12
Nalcn	ENSRNOG00000004752	-2.66259	0.00326556
AABR07024972.1	ENSRNOG00000049177	-2.66102	0.00627323
Atp6v0a4	ENSRNOG00000013428	-2.66003	9.70619e-05
RGD1566138	ENSRNOG00000052199	-2.65712	6.04259e-11
Foxa2	ENSRNOG00000013133	-2.64929	9.13598e-41
Henmt1	ENSRNOG00000042814	-2.64735	0.0115447
Irx5	ENSRNOG00000011180	-2.64477	9.15987e-20
Stk32c	ENSRNOG00000006962	-2.64121	0.00331799
Cttnbp2	ENSRNOG00000061845	-2.63791	1.77144e-11
Sytl1	ENSRNOG00000008600	-2.63759	4.09631e-07
Plch1	ENSRNOG00000009955	-2.63698	0.0101928
Pde1c	ENSRNOG00000012337	-2.63691	0.000128858
Tpbg	ENSRNOG00000010694	-2.63343	4.93227e-72
Ppm1e	ENSRNOG00000024730	-2.63276	1.83236e-06
Ablim1	ENSRNOG00000046333	-2.62948	0.0247551
Fermt3	ENSRNOG00000021161	-2.62316	0.000226028
Mmp15	ENSRNOG00000012622	-2.62071	1.16326e-06
Kprp	ENSRNOG00000028865	-2.61279	0.0117403
Mme	ENSRNOG00000009514	-2.60812	1.58426e-19
St8sia2	ENSRNOG00000012031	-2.60492	0.000156287
Atp6v1c2	ENSRNOG00000050553	-2.59753	0.0491127
Upk3bl	ENSRNOG00000038896	-2.59521	0.0412988
Adora2b	ENSRNOG00000002922	-2.59472	1.08169e-08
Map3k19	ENSRNOG00000003952	-2.58747	0.0304872
Mest	ENSRNOG00000048088	-2.58317	0.000591554
Fam160a1	ENSRNOG00000048256	-2.57838	1.22934e-07
Slamf8	ENSRNOG00000008736	-2.57599	0.000616003
Bnc2	ENSRNOG00000006553	-2.57372	0.000137833
Fam47a	ENSRNOG00000030048	-2.57101	0.0143262
Rtp4	ENSRNOG00000028895	-2.56794	0.00124263
Hecw2	ENSRNOG00000013257	-2.5658	0.035287
Shc3	ENSRNOG00000014366	-2.55889	0.000398182
LOC100361087	ENSRNOG00000042929	-2.55873	0.0373683
Slc1a3	ENSRNOG00000016163	-2.55222	0.00229021
Mpped2	ENSRNOG00000004863	-2.54594	3.14593e-13
Enpp1	ENSRNOG00000013994	-2.54019	7.50261e-09
Pafah1b3	ENSRNOG00000020481	-2.53908	1.39619e-22
Evpl	ENSRNOG00000009343	-2.53411	0.000762699
Gnai1	ENSRNOG00000057096	-2.52708	5.13447e-15
Apold1	ENSRNOG00000007830	-2.52159	3.40684e-14
Tek	ENSRNOG00000008587	-2.5121	0.00120188
Npas2	ENSRNOG00000013408	-2.49415	0.000543054
Casp1	ENSRNOG00000007372	-2.49068	1.40537e-09
Steap1	ENSRNOG00000000017	-2.49059	1.25478e-08
Tbc1d30	ENSRNOG00000023951	-2.49003	0.000615508
Lef1	ENSRNOG00000010121	-2.46845	0.00509368
Oacyl	ENSRNOG00000024640	-2.46496	0.0262018
Cdo1	ENSRNOG00000000158	-2.46488	0.00971115
Uhrf2	ENSRNOG00000011308	-2.46022	1.24136e-40
Cxcl1	ENSRNOG00000002802	-2.45422	1.29727e-24
Pitx2	ENSRNOG00000010681	-2.44718	1.60426e-08
Btc	ENSRNOG00000002728	-2.44382	3.25534e-06
Lamb3	ENSRNOG00000006025	-2.4328	0.0161891
Fhod3	ENSRNOG00000027230	-2.43265	0.000225832
Rbm20	ENSRNOG00000014705	-2.43234	0.0121816
Kif5c	ENSRNOG00000004680	-2.43157	0.00221584
Slc16a14	ENSRNOG00000017072	-2.42831	1.00153e-33
Anxa8	ENSRNOG00000060949	-2.42343	1.63556e-10
Mapk12	ENSRNOG00000031233	-2.42026	0.0121739
Itgb8	ENSRNOG00000006569	-2.40278	2.66322e-07
Fst	ENSRNOG00000011631	-2.39459	2.34215e-08
Mcam	ENSRNOG00000007726	-2.39413	2.17029e-16
Lgals3	ENSRNOG00000010645	-2.39174	2.64345e-25
Cyp4v3	ENSRNOG00000042426	-2.39122	1.07348e-08
AABR07010563.1	ENSRNOG00000048907	-2.38473	0.00494635
Ypel4	ENSRNOG00000060130	-2.38318	0.0144331
Tmem69	ENSRNOG00000029152	-2.38214	0.0277959
Esrp2	ENSRNOG00000023177	-2.3752	5.57774e-13
LOC102547078	ENSRNOG00000047740	-2.37235	0.00740814
Clcf1	ENSRNOG00000018752	-2.37194	1.14135e-12
Plscr1	ENSRNOG00000008048	-2.37144	1.36468e-06
Rab3b	ENSRNOG00000008001	-2.37133	3.96612e-15
Scrg1	ENSRNOG00000013228	-2.37021	0.000910352
Gpr37	ENSRNOG00000002524	-2.3673	9.74286e-05
Glis3	ENSRNOG00000014768	-2.36232	0.000265735
Gltpd2	ENSRNOG00000026488	-2.3612	0.00537153
Slc2a3	ENSRNOG00000008376	-2.36003	5.3337e-12
Clec2g	ENSRNOG00000059538	-2.35817	2.65112e-28
Igfbp4	ENSRNOG00000010635	-2.35213	0.000147683
Gkap1	ENSRNOG00000019272	-2.35167	3.08488e-11
Sorcs2	ENSRNOG00000007033	-2.34602	0.00359667
Plekhb1	ENSRNOG00000018627	-2.3356	0.0368813
Rn60_13_0702.4	ENSRNOG00000061961	-2.33053	0.0459775
Pcsk2	ENSRNOG00000005438	-2.32545	0.00291891
Dock3	ENSRNOG00000014576	-2.32391	7.41946e-06
Tm4sf4	ENSRNOG00000016437	-2.31522	0.00204635
Zfp473	ENSRNOG00000026572	-2.30466	4.10087e-05
LOC100910636	ENSRNOG00000024425	-2.30286	1.01924e-14
Cand2	ENSRNOG00000010473	-2.30056	6.7817e-26
Rn50_9_0428.1	ENSRNOG00000046298	-2.29467	0.000154125
Lpcat2	ENSRNOG00000016643	-2.29193	9.29474e-05
Eno3	ENSRNOG00000004078	-2.29073	3.49779e-24
Gmpr	ENSRNOG00000017250	-2.287	9.41659e-07
Psmb9	ENSRNOG00000000459	-2.28368	5.15375e-14
Itpr2	ENSRNOG00000001804	-2.27948	2.02329e-06
Kctd17	ENSRNOG00000000231	-2.27645	1.73731e-26
Runx2	ENSRNOG00000020193	-2.27637	6.96749e-07
Duox1	ENSRNOG00000033348	-2.27504	5.41728e-13
Pyroxd2	ENSRNOG00000015807	-2.27314	4.64502e-17
Unc5c	ENSRNOG00000029071	-2.27114	7.32798e-20
Agap2	ENSRNOG00000025584	-2.26998	0.0104002
Rnf144a	ENSRNOG00000007370	-2.26844	1.69677e-40
Rom1	ENSRNOG00000019858	-2.26504	3.1925e-18
Plcd4	ENSRNOG00000016361	-2.26412	0.000621481
Adgrg1	ENSRNOG00000014963	-2.26045	9.38363e-08
Pde4b	ENSRNOG00000005905	-2.2593	2.60808e-08
Rab27a	ENSRNOG00000052499	-2.25002	2.22796e-31
Slurp1	ENSRNOG00000005944	-2.24233	0.000974129
Fgfr2	ENSRNOG00000016374	-2.2383	0.000276103
Tcf7	ENSRNOG00000005872	-2.23376	9.21002e-06
Shc4	ENSRNOG00000037134	-2.22311	0.0423529
Dyrk3	ENSRNOG00000004870	-2.22117	0.015431
Cfap70	ENSRNOG00000007046	-2.21681	0.00757206
Elmo1	ENSRNOG00000059705	-2.2156	0.00010205
Neu2	ENSRNOG00000016962	-2.21488	0.0269157
Tg	ENSRNOG00000006104	-2.21188	0.000393332
Id1	ENSRNOG00000021750	-2.20797	8.00404e-19
Fosl1	ENSRNOG00000020552	-2.20664	1.96147e-13
Galnt10	ENSRNOG00000002488	-2.20597	3.5569e-15
Amz1	ENSRNOG00000024264	-2.20214	0.00356431
Hspa4l	ENSRNOG00000010819	-2.2003	2.07072e-07
Casq2	ENSRNOG00000016243	-2.19017	7.45424e-13
Slc52a3	ENSRNOG00000005132	-2.18481	0.0485633
Tcam1	ENSRNOG00000010929	-2.18288	0.0267564
Dock8	ENSRNOG00000015894	-2.18001	5.25917e-09
Rtkn	ENSRNOG00000059679	-2.17584	3.30869e-05
Cdk6	ENSRNOG00000009258	-2.17254	1.7093e-20
N4bp2	ENSRNOG00000027152	-2.16817	5.83813e-05
Angptl2	ENSRNOG00000016678	-2.16816	6.4433e-21
Slco2a1	ENSRNOG00000009005	-2.16315	1.53109e-07
Shroom3	ENSRNOG00000002208	-2.14675	6.58589e-14
Atp13a3	ENSRNOG00000001724	-2.14274	0.000613228
Prrt4	ENSRNOG00000039388	-2.13998	0.018781
Cubn	ENSRNOG00000029047	-2.13882	0.000404623
Kcnv2	ENSRNOG00000012566	-2.13742	0.0335356
Sgms2	ENSRNOG00000011284	-2.13092	1.74587e-09
Slc16a7	ENSRNOG00000007839	-2.12468	1.04378e-18
Rn60_1_2620.2	ENSRNOG00000054910	-2.11616	0.0398385
Samd10	ENSRNOG00000036719	-2.10674	2.06805e-06
Ms4a7	ENSRNOG00000020953	-2.10532	0.000153191
Jag2	ENSRNOG00000013927	-2.1028	0.0227852
Cxcl10	ENSRNOG00000022256	-2.09272	0.000155698
Fhdc1	ENSRNOG00000024594	-2.09268	1.78551e-10
Tgfa	ENSRNOG00000016182	-2.08992	9.27034e-06
Zfp518a	ENSRNOG00000036592	-2.0867	5.7476e-05
Sod3	ENSRNOG00000003869	-2.08411	1.46837e-08
Tnxb	ENSRNOG00000033581	-2.0819	1.02556e-08
Hpx	ENSRNOG00000018257	-2.07591	0.00154937
Il1r1	ENSRNOG00000014504	-2.07287	3.85089e-05
Icos	ENSRNOG00000046196	-2.07007	4.00202e-07
Ralgps2	ENSRNOG00000004736	-2.06614	4.36215e-10
Gdnf	ENSRNOG00000012819	-2.06328	0.00892818
Scara5	ENSRNOG00000014398	-2.06044	3.15836e-09
Ppef1	ENSRNOG00000027331	-2.05973	3.07119e-05
Stard9	ENSRNOG00000010050	-2.05803	3.8999e-06
Calcrl	ENSRNOG00000054695	-2.05317	6.06681e-06
Lrrc66	ENSRNOG00000026585	-2.05207	0.0425147
Wnt6	ENSRNOG00000017409	-2.05041	4.43159e-07
Hrasls	ENSRNOG00000001711	-2.04817	0.00945504
Rasgrp3	ENSRNOG00000032703	-2.04546	3.3186e-06
Sult1a1	ENSRNOG00000019342	-2.03958	0.0385057
Dennd2d	ENSRNOG00000017680	-2.03943	0.042608
Pdzd4	ENSRNOG00000056174	-2.03616	9.57801e-07
Ggact	ENSRNOG00000027040	-2.03499	1.01477e-10
Mertk	ENSRNOG00000017319	-2.03389	0.000458977
Lrrc20	ENSRNOG00000000560	-2.02831	7.13382e-24
Krt80	ENSRNOG00000025994	-2.02684	6.27049e-16
Mat1a	ENSRNOG00000011351	-2.02582	0.00754426
Atp1b1	ENSRNOG00000002934	-2.02161	1.04158e-17
Elovl6	ENSRNOG00000010468	-2.02032	0.0122239
Dnm1	ENSRNOG00000033835	-2.01338	2.21245e-09
P2rx5	ENSRNOG00000019208	-2.00728	0.000254343
Adamts14	ENSRNOG00000000563	-2.00278	1.70841e-05
Ahr	ENSRNOG00000004342	-1.99513	3.93663e-06
Gnb4	ENSRNOG00000011070	-1.9859	3.41297e-13
Osmr	ENSRNOG00000033192	-1.98399	3.88153e-06
Kcnab2	ENSRNOG00000011550	-1.98102	1.40529e-05
Mt2A	ENSRNOG00000043098	-1.9776	6.31882e-11
Flt1	ENSRNOG00000000940	-1.97598	7.13165e-10
Rps6ka5	ENSRNOG00000004362	-1.97339	4.43569e-08
LOC100360218	ENSRNOG00000013170	-1.96156	0.000102454
Hspa1l	ENSRNOG00000047966	-1.95161	0.00142107
Slitrk5	ENSRNOG00000009649	-1.95067	0.014547
RGD1306271	ENSRNOG00000013729	-1.94844	3.07209e-06
Foxs1	ENSRNOG00000008529	-1.9473	1.23027e-05
Olfm2	ENSRNOG00000020519	-1.92588	0.0022987
LOC100911548	ENSRNOG00000047113	-1.92547	0.00168244
Egfl7	ENSRNOG00000019388	-1.92224	2.15377e-07
Mmp17	ENSRNOG00000023643	-1.92145	3.21767e-05
Eya1	ENSRNOG00000007590	-1.91788	0.00145571
Clu	ENSRNOG00000016460	-1.91462	9.20176e-19
Plcb1	ENSRNOG00000004810	-1.91227	0.0147558
Srpx	ENSRNOG00000039666	-1.90525	1.37626e-15
Frmpd1	ENSRNOG00000012546	-1.90468	0.000134087
Tlcd2	ENSRNOG00000037275	-1.90377	0.0176402
Dusp5	ENSRNOG00000014061	-1.90064	1.47552e-09
RGD1304587	ENSRNOG00000002944	-1.89905	2.13522e-10
Kank3	ENSRNOG00000007230	-1.89603	7.78518e-08
Trim68	ENSRNOG00000047229	-1.89225	0.00234362
Mmp24	ENSRNOG00000047028	-1.89148	0.00573468
Avil	ENSRNOG00000050419	-1.88984	0.000366028
Mecom	ENSRNOG00000012645	-1.8882	6.15043e-06
Lnx1	ENSRNOG00000002272	-1.88747	0.0146912
Sertad4	ENSRNOG00000060773	-1.88746	9.71275e-21
Sp6	ENSRNOG00000023551	-1.88298	0.00124479
Tmem119	ENSRNOG00000000700	-1.8793	2.74047e-21
Map1b	ENSRNOG00000017428	-1.8786	4.81754e-20
Cmip	ENSRNOG00000013178	-1.87254	2.58282e-10
P4ha3	ENSRNOG00000017118	-1.86492	5.44022e-75
Pard6a	ENSRNOG00000017746	-1.86461	0.00109549
Bst2	ENSRNOG00000059900	-1.85878	4.24585e-09
Psca	ENSRNOG00000061376	-1.85747	5.49026e-05
Tjp2	ENSRNOG00000015030	-1.85551	9.69999e-24
Eda	ENSRNOG00000032208	-1.85302	7.32875e-06
Rgma	ENSRNOG00000012874	-1.85032	2.69387e-12
Lfng	ENSRNOG00000001250	-1.84787	2.3096e-15
Kcnd3	ENSRNOG00000014686	-1.8461	0.00018101
B4galnt1	ENSRNOG00000004839	-1.84444	2.65476e-07
Zfhx4	ENSRNOG00000008765	-1.84093	0.0403978
Ereg	ENSRNOG00000002771	-1.83992	6.90212e-08
Tnfaip8l1	ENSRNOG00000045999	-1.8387	1.96438e-08
Ceacam1	ENSRNOG00000020578	-1.8343	1.10454e-05
Erbb3	ENSRNOG00000004964	-1.83387	1.96446e-06
Lpar1	ENSRNOG00000013656	-1.82984	3.25067e-10
Ripk3	ENSRNOG00000020465	-1.82732	3.92179e-12
LOC500956	ENSRNOG00000020580	-1.81981	0.00203765
Oasl2	ENSRNOG00000028814	-1.81974	0.000281816
Tpd52	ENSRNOG00000011441	-1.81789	7.87673e-32
Gprc5c	ENSRNOG00000003144	-1.81394	1.10671e-30
Arl4a	ENSRNOG00000004282	-1.81364	4.65783e-10
Ccdc15	ENSRNOG00000032180	-1.80599	0.00875086
LOC108348047	ENSRNOG00000049422	-1.80553	0.00264247
Wdr78	ENSRNOG00000006999	-1.80513	0.000124886
Sdc1	ENSRNOG00000059947	-1.79952	1.13782e-53
Ssc4d	ENSRNOG00000001435	-1.79246	0.000611334
Tert	ENSRNOG00000025327	-1.7917	0.0071427
Lmo1	ENSRNOG00000014629	-1.78848	3.52302e-12
Lox	ENSRNOG00000014426	-1.7875	1.50921e-14
Runx1	ENSRNOG00000001704	-1.78239	2.41153e-14
Pik3c2b	ENSRNOG00000029938	-1.78217	2.35294e-07
Rnasel	ENSRNOG00000027017	-1.77738	0.00330426
Thrb	ENSRNOG00000006649	-1.77693	0.00352195
Pxn	ENSRNOG00000001149	-1.77471	1.17343e-45
Hmga1	ENSRNOG00000000488	-1.77063	4.91589e-23
Cyp26b1	ENSRNOG00000015076	-1.76886	0.000119915
Jade2	ENSRNOG00000004956	-1.76758	1.68696e-08
Acad11	ENSRNOG00000010940	-1.76464	3.03899e-13
Ctxn3	ENSRNOG00000022957	-1.76462	0.00221989
Ltbp1	ENSRNOG00000033090	-1.76385	1.07093e-22
Mybphl	ENSRNOG00000037082	-1.7621	0.0299381
Wisp1	ENSRNOG00000007078	-1.75802	0.000132754
Kif26b	ENSRNOG00000028624	-1.75272	0.000371433
Sipa1l3	ENSRNOG00000020703	-1.74554	1.66705e-06
Rpia	ENSRNOG00000005576	-1.7447	1.15762e-16
S1pr3	ENSRNOG00000014524	-1.74412	0.0222242
Myo1b	ENSRNOG00000048152	-1.74401	1.73791e-12
Zbtb20	ENSRNOG00000056716	-1.74214	4.54254e-11
Abhd2	ENSRNOG00000017120	-1.74213	2.19649e-21
Tlcd1	ENSRNOG00000012579	-1.74161	1.72275e-09
Gas7	ENSRNOG00000049361	-1.74098	7.04846e-10
Il15ra	ENSRNOG00000018706	-1.73198	0.0405183
Ephb6	ENSRNOG00000014367	-1.72914	0.000254994
Frmd4b	ENSRNOG00000007764	-1.72787	6.40764e-22
Ascl2	ENSRNOG00000020434	-1.72437	0.0268931
Nptxr	ENSRNOG00000016156	-1.71708	9.13144e-20
Tle3	ENSRNOG00000013013	-1.71325	5.43954e-12
Tnnt2	ENSRNOG00000033734	-1.71256	0.0308193
Cxcr5	ENSRNOG00000012430	-1.71206	0.0270015
Plcl1	ENSRNOG00000032659	-1.708	1.60938e-05
Hes1	ENSRNOG00000001720	-1.70449	2.00923e-16
Ltbp4	ENSRNOG00000020871	-1.70329	9.65544e-08
Ucp2	ENSRNOG00000017854	-1.69931	1.15801e-64
Rflnb	ENSRNOG00000006674	-1.69754	3.66552e-14
Spon2	ENSRNOG00000006033	-1.6975	2.53381e-08
Nrp2	ENSRNOG00000031232	-1.69659	0.03996
Uba1y	ENSRNOG00000052326	-1.69505	6.32017e-09
Kitlg	ENSRNOG00000005386	-1.69318	8.06523e-15
Pkp1	ENSRNOG00000010076	-1.69044	2.2742e-12
Gpc1	ENSRNOG00000049437	-1.68544	1.92265e-10
Mgat3	ENSRNOG00000017434	-1.68341	0.000432183
Ugcg	ENSRNOG00000015644	-1.68222	3.03899e-13
Chn1	ENSRNOG00000017939	-1.68157	8.06232e-11
Alcam	ENSRNOG00000001989	-1.67976	1.22475e-06
Ramp2	ENSRNOG00000020415	-1.67893	1.07544e-10
Xkr8	ENSRNOG00000024312	-1.67708	6.19492e-08
Rapgef3	ENSRNOG00000059961	-1.66956	1.89583e-06
RT1-CE7	ENSRNOG00000031090	-1.66858	0.00058636
Lima1	ENSRNOG00000059801	-1.66566	2.19248e-17
Sat1	ENSRNOG00000003809	-1.6636	1.14687e-17
Ephb3	ENSRNOG00000031801	-1.66264	1.83034e-11
Cyp2d1	ENSRNOG00000029179	-1.66109	0.00175296
Arhgef3	ENSRNOG00000014363	-1.65418	4.40185e-05
Nr4a2	ENSRNOG00000005600	-1.65212	3.38824e-07
Gja1	ENSRNOG00000000805	-1.65174	8.58863e-21
Brcc3	ENSRNOG00000048061	-1.64762	3.97072e-22
Sema3c	ENSRNOG00000006526	-1.64495	0.00185686
Rn50_16_0006.1	ENSRNOG00000050746	-1.64174	0.0160282
LOC100912399	ENSRNOG00000050275	-1.63996	0.0117343
Nqo1	ENSRNOG00000012772	-1.63923	0.0200951
Fam131b	ENSRNOG00000017149	-1.63657	0.00401163
Psmb10	ENSRNOG00000019494	-1.63046	1.08418e-07
Afdn	ENSRNOG00000023753	-1.62646	2.89838e-05
Ier5l	ENSRNOG00000024846	-1.62432	3.39553e-23
Slc4a4	ENSRNOG00000003134	-1.62243	0.000360831
Slc12a2	ENSRNOG00000015971	-1.61955	1.36403e-08
Rnaseh2c	ENSRNOG00000020700	-1.61866	8.93564e-05
Nxn	ENSRNOG00000008178	-1.61849	5.82476e-24
Cnn1	ENSRNOG00000027736	-1.61542	0.0388617
Tmem50b	ENSRNOG00000002028	-1.6153	1.31848e-13
Cryl1	ENSRNOG00000008989	-1.61413	2.08734e-05
Plekha5	ENSRNOG00000008747	-1.60807	0.00609852
Synj2	ENSRNOG00000017114	-1.6075	6.57772e-06
Abca9	ENSRNOG00000059326	-1.60437	0.000263008
AABR07062512.1	ENSRNOG00000053339	-1.60317	0.00386002
LOC500227	ENSRNOG00000009917	-1.60308	0.0446074
Gdf15	ENSRNOG00000019661	-1.5991	8.64984e-11
Cpne2	ENSRNOG00000043286	-1.59736	1.1783e-10
Rel	ENSRNOG00000054437	-1.58052	4.21451e-06
Irf7	ENSRNOG00000017414	-1.57965	6.86284e-05
Tigd3	ENSRNOG00000023318	-1.57867	0.00641286
Fzd1	ENSRNOG00000016242	-1.57754	1.37277e-07
Ppp1r3e	ENSRNOG00000014904	-1.57734	0.00628037
Tbc1d8	ENSRNOG00000013583	-1.57728	0.0147623
Fam184a	ENSRNOG00000026407	-1.57533	3.43484e-11
Emb	ENSRNOG00000060329	-1.57032	6.20744e-10
AABR07071876.1	ENSRNOG00000017306	-1.56829	0.00241217
B3galt4	ENSRNOG00000000471	-1.55957	4.36134e-06
Sytl4	ENSRNOG00000003526	-1.5565	6.18687e-06
Cyp4f6	ENSRNOG00000043233	-1.55419	0.00145681
Cbx2	ENSRNOG00000049215	-1.55192	8.76344e-11
Zbtb37	ENSRNOG00000026907	-1.54812	0.000640087
Cdkl5	ENSRNOG00000003742	-1.54517	0.000190523
Lgals9	ENSRNOG00000012681	-1.543	2.22903e-05
Slfn4	ENSRNOG00000057092	-1.54213	0.00010212
Sulf2	ENSRNOG00000006052	-1.54094	7.69634e-08
Arhgap22	ENSRNOG00000024728	-1.54043	9.99093e-08
Ntn3	ENSRNOG00000006970	-1.5376	4.78516e-06
Osbpl3	ENSRNOG00000010011	-1.53673	1.88037e-06
Cdkn2b	ENSRNOG00000006735	-1.53497	0.00845858
Abhd1	ENSRNOG00000025689	-1.53328	1.34095e-06
Aoc3	ENSRNOG00000051307	-1.52751	0.0303488
P2ry1	ENSRNOG00000014232	-1.52747	5.78422e-06
Hdac9	ENSRNOG00000004158	-1.52101	0.0318821
Mbnl3	ENSRNOG00000002487	-1.52048	1.98004e-05
AC120807.1	ENSRNOG00000053946	-1.51742	0.00516185
Il16	ENSRNOG00000011680	-1.5173	2.95136e-05
Dhx58	ENSRNOG00000018247	-1.51424	0.000383073
Rn60_6_0648.1	ENSRNOG00000058248	-1.51326	0.00501359
Runx1t1	ENSRNOG00000005673	-1.51288	8.53521e-06
Tmem173	ENSRNOG00000042137	-1.51285	0.000111654
Il13ra1	ENSRNOG00000001713	-1.51206	1.01722e-08
LOC100912399	ENSRNOG00000013177	-1.51148	0.00488164
LOC103694557	ENSRNOG00000056639	-1.51097	5.02035e-09
Gk5	ENSRNOG00000010942	-1.50967	0.0262726
Wdhd1	ENSRNOG00000011167	-1.50474	8.7697e-08
Kcnk6	ENSRNOG00000020598	-1.49836	0.000323813
Txnrd3	ENSRNOG00000059810	-1.49833	1.79133e-06
AABR07002896.1	ENSRNOG00000047627	-1.49763	0.0313536
AABR07002870.1	ENSRNOG00000048116	-1.49763	0.0313536
Slc29a1	ENSRNOG00000019752	-1.49744	0.0279912
Irs2	ENSRNOG00000023509	-1.49454	6.97378e-08
Slc39a13	ENSRNOG00000011981	-1.4886	2.22475e-24
Ticam2	ENSRNOG00000042070	-1.48483	0.0253831
Celf2	ENSRNOG00000023661	-1.48444	0.000147683
Fkbp5	ENSRNOG00000022523	-1.48411	4.13998e-14
Oas1g	ENSRNOG00000047076	-1.48385	0.00705285
Parp8	ENSRNOG00000010824	-1.48382	8.20696e-06
Sh3d19	ENSRNOG00000011752	-1.48151	1.64053e-06
LOC103691744	ENSRNOG00000010658	-1.48034	0.0262773
Ppm1h	ENSRNOG00000004314	-1.47703	6.76246e-06
Cstf2	ENSRNOG00000048025	-1.47241	1.05842e-08
Eva1c	ENSRNOG00000002072	-1.47116	3.48592e-06
Fam129a	ENSRNOG00000002403	-1.47059	0.000224623
Tbkbp1	ENSRNOG00000009370	-1.46726	2.13525e-06
Cdh24	ENSRNOG00000013503	-1.46477	4.7511e-16
Nrep	ENSRNOG00000020467	-1.46458	0.000762721
Zeb1	ENSRNOG00000017863	-1.46404	5.68735e-22
Kcnn4	ENSRNOG00000019440	-1.45708	3.55545e-13
Tnfaip3	ENSRNOG00000049517	-1.456	0.000299468
Elf4	ENSRNOG00000005352	-1.45585	2.8772e-05
Fam189b	ENSRNOG00000020518	-1.45287	1.93013e-17
Rps6ka6	ENSRNOG00000002592	-1.45269	1.049e-05
Tmem8a	ENSRNOG00000020374	-1.45252	5.28097e-06
Zfp865	ENSRNOG00000016279	-1.44867	4.25147e-05
Fgfr1	ENSRNOG00000016050	-1.448	0.000168417
Amigo1	ENSRNOG00000045665	-1.44753	0.00522624
Nbeal1	ENSRNOG00000021525	-1.44561	9.72348e-06
Tbc1d2	ENSRNOG00000023348	-1.43861	7.72328e-09
Amotl2	ENSRNOG00000008487	-1.42801	1.25354e-22
Sipa1	ENSRNOG00000020726	-1.42764	3.96248e-17
Rgs17	ENSRNOG00000018690	-1.42574	2.92214e-05
Rn50_X_0711.1	ENSRNOG00000051321	-1.41806	0.0218729
Ptafr	ENSRNOG00000013231	-1.41634	1.31703e-08
Shb	ENSRNOG00000011503	-1.41534	1.6909e-15
Hspa2	ENSRNOG00000006472	-1.41505	2.85187e-05
Oas1b	ENSRNOG00000033220	-1.41273	0.00639584
Pik3cb	ENSRNOG00000016384	-1.41268	2.2742e-12
Syne3	ENSRNOG00000005287	-1.40836	1.02256e-05
LOC100910581	ENSRNOG00000024505	-1.40627	0.000146696
Emc9	ENSRNOG00000019162	-1.40606	0.016868
P2ry2	ENSRNOG00000019283	-1.40524	0.000353069
Cdt1	ENSRNOG00000013970	-1.40421	4.94664e-09
Lacc1	ENSRNOG00000022094	-1.40404	6.46033e-07
NEWGENE_621351	ENSRNOG00000011292	-1.40075	9.07654e-05
Hpdl	ENSRNOG00000018143	-1.39788	0.00864609
Pdgfc	ENSRNOG00000010695	-1.39529	3.03429e-14
Tlr5	ENSRNOG00000022067	-1.39482	1.12286e-05
Pear1	ENSRNOG00000014243	-1.39054	1.02281e-19
Bcl7a	ENSRNOG00000056017	-1.38931	0.000317924
Layn	ENSRNOG00000011228	-1.38645	0.00497543
Cdyl2	ENSRNOG00000042888	-1.38136	1.33437e-06
Prrg4	ENSRNOG00000022710	-1.37984	0.000554759
Endod1	ENSRNOG00000024757	-1.37815	0.00159198
AABR07053749.1	ENSRNOG00000053070	-1.37785	2.59832e-08
Casp8	ENSRNOG00000012331	-1.37618	5.84665e-12
Ror2	ENSRNOG00000053232	-1.37191	0.00826432
RGD1562037	ENSRNOG00000027938	-1.37015	0.0063122
Fzd5	ENSRNOG00000014678	-1.36999	0.00245501
Smad6	ENSRNOG00000009173	-1.36983	3.842e-14
Relb	ENSRNOG00000033235	-1.36584	6.0353e-07
Id3	ENSRNOG00000026124	-1.35572	6.45582e-21
Cyp46a1	ENSRNOG00000007147	-1.35494	2.5189e-05
Abcd1	ENSRNOG00000056524	-1.35388	2.53974e-33
Gatsl2	ENSRNOG00000001484	-1.35253	0.0176402
Axl	ENSRNOG00000020716	-1.35101	1.91488e-20
Fxyd5	ENSRNOG00000021062	-1.35024	2.74305e-09
Abcg3l3	ENSRNOG00000039890	-1.35	0.00434859
Tex9	ENSRNOG00000059702	-1.34847	0.0116593
Ppfibp1	ENSRNOG00000031709	-1.34735	1.61827e-09
Syne2	ENSRNOG00000005323	-1.34533	0.000112891
Kbtbd6	ENSRNOG00000047604	-1.34434	0.00517832
Rn60_11_0620.2	ENSRNOG00000062181	-1.34279	1.67341e-11
Sertad2	ENSRNOG00000005393	-1.33948	3.85089e-05
Dhcr7	ENSRNOG00000020776	-1.33848	1.22994e-08
Crlf1	ENSRNOG00000020030	-1.33823	0.00253119
Irf1	ENSRNOG00000008144	-1.33575	1.04302e-08
Ecm1	ENSRNOG00000021166	-1.33454	6.20301e-23
Ccdc85c	ENSRNOG00000051719	-1.33067	0.000594389
Ogg1	ENSRNOG00000052140	-1.32817	1.52264e-09
Pi4k2b	ENSRNOG00000003924	-1.32646	5.70221e-09
Ngf	ENSRNOG00000016571	-1.3263	1.70813e-05
FAM120C	ENSRNOG00000062231	-1.32591	0.000620995
Slc24a3	ENSRNOG00000060687	-1.32574	0.00490648
Steap3	ENSRNOG00000049471	-1.32561	2.31248e-19
Prkaa2	ENSRNOG00000007706	-1.32286	0.0299271
Smpdl3b	ENSRNOG00000042326	-1.32232	8.86351e-10
Xrcc3	ENSRNOG00000012141	-1.3211	0.00819115
Exoc6	ENSRNOG00000036601	-1.31855	1.19474e-05
Eif4e3	ENSRNOG00000010301	-1.31828	3.29422e-08
Mthfr	ENSRNOG00000008553	-1.3168	5.35101e-05
Ptpn14	ENSRNOG00000003407	-1.31526	2.17415e-05
Pcdh7	ENSRNOG00000012367	-1.31422	0.0127892
Snai1	ENSRNOG00000009594	-1.31411	2.80307e-07
Rassf9	ENSRNOG00000038574	-1.31245	3.18558e-05
Rgl2	ENSRNOG00000000474	-1.31076	1.93566e-29
Cgn	ENSRNOG00000020952	-1.30689	0.0465278
Dtx4	ENSRNOG00000021086	-1.30578	2.47021e-05
Ino80d	ENSRNOG00000024272	-1.30397	0.000410856
Gli3	ENSRNOG00000014395	-1.3036	0.0122721
Bmp4	ENSRNOG00000009694	-1.30192	0.00425519
E2f8	ENSRNOG00000022537	-1.30141	0.000732369
Fam46b	ENSRNOG00000056153	-1.29922	6.31299e-07
Chd7	ENSRNOG00000006689	-1.297	0.000982498
Fam199x	ENSRNOG00000049849	-1.29591	0.00311693
Col15a1	ENSRNOG00000060381	-1.2959	4.56097e-05
Creb3l1	ENSRNOG00000005413	-1.29377	1.88376e-05
Msln	ENSRNOG00000019445	-1.29369	0.00142107
Rfwd3	ENSRNOG00000051461	-1.29209	3.15041e-08
Arhgef26	ENSRNOG00000014549	-1.29021	0.0034231
Opn3	ENSRNOG00000003778	-1.28985	0.000100116
Rnase4	ENSRNOG00000025625	-1.28855	0.0005674
Dnhd1	ENSRNOG00000051291	-1.28615	0.00847366
Zfp217	ENSRNOG00000021787	-1.28034	5.68918e-05
Bmpr2	ENSRNOG00000022196	-1.2797	0.000764885
Kif24	ENSRNOG00000012735	-1.27628	2.00125e-05
Gpm6a	ENSRNOG00000010731	-1.27616	0.00735317
Clcn2	ENSRNOG00000050854	-1.26965	0.0485725
Ptpn6	ENSRNOG00000014294	-1.26791	0.00386998
Mturn	ENSRNOG00000010205	-1.26751	0.0440031
NEWGENE_621351	ENSRNOG00000052925	-1.26716	7.62273e-08
Stbd1	ENSRNOG00000002218	-1.26419	6.71816e-06
Srebf1	ENSRNOG00000003463	-1.26416	6.68571e-09
LOC102549542	ENSRNOG00000048949	-1.261	9.99511e-10
Krcc1	ENSRNOG00000007124	-1.26054	1.67992e-13
Zfhx3	ENSRNOG00000014452	-1.25879	0.00145235
Prrx2	ENSRNOG00000058329	-1.2584	2.8084e-20
Bend6	ENSRNOG00000052376	-1.25429	9.6495e-09
Map3k7cl	ENSRNOG00000001584	-1.25266	1.93185e-05
Uaca	ENSRNOG00000012868	-1.25259	2.86085e-13
Nemp1	ENSRNOG00000046492	-1.25247	1.24296e-08
Duox2	ENSRNOG00000017395	-1.25138	0.0469593
Lrrc8e	ENSRNOG00000028460	-1.24969	1.78233e-16
Neil3	ENSRNOG00000011688	-1.24861	0.000631998
Notch2	ENSRNOG00000018835	-1.24711	4.05482e-05
Bmp6	ENSRNOG00000013717	-1.24465	0.00023128
Arhgef39	ENSRNOG00000021433	-1.2433	1.45357e-06
Dock9	ENSRNOG00000011969	-1.23938	3.648e-07
Ccdc34	ENSRNOG00000005902	-1.239	8.77518e-05
Cdkn2a	ENSRNOG00000059837	-1.2386	0.0445906
LOC691418	ENSRNOG00000025980	-1.2383	0.0145824
Tshz1	ENSRNOG00000016246	-1.23571	0.00455303
Ptprf	ENSRNOG00000019977	-1.23507	6.87953e-07
Rpl13a	ENSRNOG00000020618	-1.23402	0.00958732
Tgfbr2	ENSRNOG00000013265	-1.22341	0.00775238
Fscn1	ENSRNOG00000056585	-1.22301	1.35992e-13
Cfap53	ENSRNOG00000014585	-1.2229	0.00556739
Dfna5	ENSRNOG00000009970	-1.22068	0.00871052
Tap2	ENSRNOG00000000455	-1.21327	4.5058e-05
Tnfsf12	ENSRNOG00000045670	-1.21258	1.23494e-05
Ptprm	ENSRNOG00000011700	-1.20964	2.11397e-07
Atp1a1	ENSRNOG00000030019	-1.20645	6.53278e-51
Prdm16	ENSRNOG00000045913	-1.20629	2.60682e-09
AABR07064878.1	ENSRNOG00000061968	-1.20552	0.0394262
Kazald1	ENSRNOG00000016058	-1.20472	0.000421246
Ifi47	ENSRNOG00000002470	-1.20419	0.0250547
Dusp6	ENSRNOG00000023896	-1.20232	0.00015813
Dhrs13	ENSRNOG00000009673	-1.20034	7.74891e-07
Thbs1	ENSRNOG00000045829	-1.19979	0.00599848
E2f2	ENSRNOG00000047741	-1.19815	0.0024737
Fam102a	ENSRNOG00000050834	-1.19752	6.27796e-07
Prnp	ENSRNOG00000021259	-1.19739	3.74418e-10
Adgrg6	ENSRNOG00000011411	-1.19706	7.10757e-05
RGD1310951	ENSRNOG00000016780	-1.19703	0.00833759
Nanos1	ENSRNOG00000025060	-1.19523	0.00657866
LOC680200	ENSRNOG00000042308	-1.19398	0.000779718
Gpat3	ENSRNOG00000002159	-1.19338	2.06205e-08
LOC100911660	ENSRNOG00000047692	-1.19297	1.78117e-10
Samd1	ENSRNOG00000052637	-1.19294	8.08898e-11
Slc10a3	ENSRNOG00000060580	-1.19234	2.67403e-24
Nt5dc3	ENSRNOG00000026793	-1.18973	0.0216047
Gsap	ENSRNOG00000028801	-1.18951	0.0364286
Plpp3	ENSRNOG00000008116	-1.18698	2.91547e-08
Gse1	ENSRNOG00000017489	-1.18509	0.00655539
Fmn1	ENSRNOG00000031760	-1.18365	0.00118025
Mpp6	ENSRNOG00000021579	-1.17992	2.06329e-09
Col8a1	ENSRNOG00000039668	-1.17903	1.04874e-09
Ahnak	ENSRNOG00000057569	-1.1777	1.1999e-10
Tbx3	ENSRNOG00000008706	-1.17751	4.04446e-07
Stard4	ENSRNOG00000020468	-1.17506	6.0056e-06
Tspan5	ENSRNOG00000015913	-1.1725	5.3141e-10
Rilp	ENSRNOG00000003784	-1.16305	0.00849114
Dram1	ENSRNOG00000038916	-1.16288	0.0308143
Asf1b	ENSRNOG00000005115	-1.16266	2.27619e-12
Egfr	ENSRNOG00000004332	-1.16077	0.029064
Enah	ENSRNOG00000031934	-1.15749	1.07995e-18
Fancg	ENSRNOG00000057945	-1.15502	0.0108956
Radil	ENSRNOG00000024456	-1.15271	0.0299381
Lrrc73	ENSRNOG00000039856	-1.14964	0.0119549
Rnd2	ENSRNOG00000020698	-1.14936	1.92897e-05
LOC100911825	ENSRNOG00000046663	-1.14856	0.0317775
Gab1	ENSRNOG00000017879	-1.14425	0.0124972
Fam20a	ENSRNOG00000003969	-1.14142	0.0481996
Arpc5	ENSRNOG00000028062	-1.14016	2.14922e-20
Pak3	ENSRNOG00000004676	-1.13862	0.00569735
Duoxa1	ENSRNOG00000018005	-1.1385	0.00837658
Spsb2	ENSRNOG00000015125	-1.13649	2.6593e-08
LOC108348118	ENSRNOG00000055229	-1.13601	0.00344734
Zfp296	ENSRNOG00000049605	-1.13439	0.00346454
Tmem223	ENSRNOG00000019266	-1.13275	0.000761891
Cnksr3	ENSRNOG00000018052	-1.13184	4.96797e-11
Setd7	ENSRNOG00000013045	-1.13145	0.000190951
Sntb2	ENSRNOG00000020344	-1.13124	0.0361816
Ptchd1	ENSRNOG00000003675	-1.1297	0.0418215
Scara3	ENSRNOG00000016177	-1.12859	4.57081e-10
Zbtb25	ENSRNOG00000006441	-1.12682	0.00168325
Sorbs2	ENSRNOG00000013391	-1.12593	2.05282e-06
Spata33	ENSRNOG00000038239	-1.12433	0.0314068
Psd3	ENSRNOG00000013884	-1.12402	0.00265652
AABR07037943.1	ENSRNOG00000051958	-1.12367	0.0206423
Tmem64	ENSRNOG00000007426	-1.12331	0.0171562
Cdc14a	ENSRNOG00000014515	-1.12255	5.32299e-05
C1qtnf1	ENSRNOG00000003259	-1.11562	1.91714e-07
Ptprj	ENSRNOG00000034025	-1.10886	0.00375602
Efnb2	ENSRNOG00000014648	-1.10866	4.90319e-05
Arg1	ENSRNOG00000013304	-1.10768	0.000240591
Apol9a	ENSRNOG00000023410	-1.10562	0.00623776
Lsp1	ENSRNOG00000020300	-1.10223	0.0356319
Cdkn2aipnl	ENSRNOG00000005024	-1.1022	2.73377e-12
Ttc7a	ENSRNOG00000014879	-1.09991	9.24637e-13
Etv4	ENSRNOG00000020792	-1.09885	4.55995e-06
Plk1	ENSRNOG00000018815	-1.09831	1.05992e-32
Mcu	ENSRNOG00000045920	-1.09654	1.06511e-08
Slc10a4	ENSRNOG00000026091	-1.09375	0.00988319
RGD1565536	ENSRNOG00000028910	-1.09143	4.87142e-10
Ccne2	ENSRNOG00000008055	-1.08992	8.34648e-08
Pts	ENSRNOG00000009250	-1.08831	0.000197631
Ankrd9	ENSRNOG00000008056	-1.0874	1.40744e-09
LOC688583	ENSRNOG00000050910	-1.08699	4.1339e-05
Nmnat2	ENSRNOG00000027697	-1.0869	0.045525
Glb1l2	ENSRNOG00000007561	-1.08446	0.000456835
Gan	ENSRNOG00000012671	-1.08239	0.00605244
Letm2	ENSRNOG00000026180	-1.07961	0.00426413
Pid1	ENSRNOG00000029735	-1.07934	0.0032341
F2rl2	ENSRNOG00000018054	-1.07884	0.0325022
Pla2r1	ENSRNOG00000008129	-1.074	0.0326664
Vsig10	ENSRNOG00000022698	-1.07141	9.17834e-09
Sim2	ENSRNOG00000054203	-1.07119	0.0413552
Crcp	ENSRNOG00000000901	-1.07038	1.05376e-06
Cdon	ENSRNOG00000011789	-1.06843	0.047453
Tjp1	ENSRNOG00000011077	-1.0677	0.000251331
Bag3	ENSRNOG00000020298	-1.06742	1.01477e-10
Stxbp5	ENSRNOG00000013351	-1.06654	0.000874118
Cgref1	ENSRNOG00000007923	-1.06605	0.000187687
LOC102550543	ENSRNOG00000057097	-1.06502	0.00115438
Hirip3	ENSRNOG00000029061	-1.06461	6.08247e-12
Tmtc4	ENSRNOG00000014310	-1.06447	1.8033e-06
Rmi2	ENSRNOG00000021902	-1.06392	0.0177521
Ifi35	ENSRNOG00000020678	-1.06098	2.08778e-05
Zkscan4	ENSRNOG00000051823	-1.06007	0.0147506
Hip1r	ENSRNOG00000001091	-1.05847	3.23209e-12
Zfp275	ENSRNOG00000061073	-1.05836	2.40103e-05
Tonsl	ENSRNOG00000014703	-1.05624	3.44535e-13
Smad3	ENSRNOG00000008620	-1.05423	5.88182e-08
Ccnd1	ENSRNOG00000020918	-1.05315	1.07295e-17
Hspb6	ENSRNOG00000020922	-1.05303	9.33067e-06
Inpp5j	ENSRNOG00000019361	-1.04831	0.0102164
Nmt2	ENSRNOG00000026248	-1.04648	1.70948e-06
Kctd11	ENSRNOG00000015669	-1.04612	2.51834e-05
Pgap1	ENSRNOG00000013388	-1.04578	0.00133618
Fbxo6	ENSRNOG00000009217	-1.04302	1.27934e-05
RGD1561796	ENSRNOG00000007268	-1.04084	0.00586547
Hmgb3	ENSRNOG00000011096	-1.03852	1.60416e-07
Sacs	ENSRNOG00000014509	-1.03623	0.000851558
Tapbp	ENSRNOG00000029500	-1.03277	2.03604e-06
Mcm10	ENSRNOG00000017981	-1.03042	1.14029e-09
Cdh2	ENSRNOG00000015602	-1.03015	0.00117133
Zfp82	ENSRNOG00000030932	-1.02986	0.0278331
Suv39h2	ENSRNOG00000015585	-1.02843	7.62173e-09
Itgb5	ENSRNOG00000001795	-1.02588	3.43297e-07
LOC102549471	ENSRNOG00000020188	-1.02412	0.0077147
Nme3	ENSRNOG00000015749	-1.02362	0.00303096
Fntb	ENSRNOG00000007660	-1.02357	0.0407073
Mtmr11	ENSRNOG00000021176	-1.02254	1.7165e-07
Foxp4	ENSRNOG00000022804	-1.02067	0.00201306
Tm4sf1	ENSRNOG00000015812	-1.01973	0.000821265
Col6a2	ENSRNOG00000001254	-1.01845	0.000269392
Ttbk2	ENSRNOG00000011059	-1.01391	0.00033512
Slc17a9	ENSRNOG00000010275	-1.01351	0.000188909
AC109096.1	ENSRNOG00000046560	-1.01278	0.0199932
Osr2	ENSRNOG00000011136	-1.01224	0.0281215
Fam111a	ENSRNOG00000012067	-1.01208	9.19793e-32
Slc25a37	ENSRNOG00000015495	-1.01059	1.21653e-06
Pold1	ENSRNOG00000019681	-1.00968	4.19732e-14
Fanci	ENSRNOG00000016689	-1.00901	8.1532e-07
Sdc4	ENSRNOG00000014297	-1.00743	9.40935e-07
Shroom1	ENSRNOG00000007431	-1.0071	8.93632e-08
Bcorl1	ENSRNOG00000005076	-1.0063	1.67587e-05
Ankh	ENSRNOG00000010960	-1.00464	0.0136777
Txndc5	ENSRNOG00000013469	-1.00405	4.23352e-24
Fkbp4	ENSRNOG00000006444	-1.00374	8.79444e-07
Eml3	ENSRNOG00000019873	-1.00129	3.24728e-09
Abhd3	ENSRNOG00000029370	1.00095	0.00148684
Crlf2	ENSRNOG00000049828	1.00341	0.000173756
Fam162a	ENSRNOG00000002255	1.00516	0.000189981
Rapgef5	ENSRNOG00000005271	1.01034	0.0114893
Btn2a2	ENSRNOG00000038877	1.01163	1.03717e-06
Lactb2	ENSRNOG00000007829	1.01312	1.07746e-09
Rab4a	ENSRNOG00000017467	1.01332	2.60551e-05
LOC103689961	ENSRNOG00000051483	1.01465	0.000634516
Kyat3	ENSRNOG00000043426	1.01625	0.0279421
Hist1h2af	ENSRNOG00000022146	1.01682	0.0136592
Cystm1	ENSRNOG00000018775	1.01735	2.50826e-06
Fam63b	ENSRNOG00000061337	1.02113	0.0110849
Vash1	ENSRNOG00000010457	1.02119	0.00382274
Rps6ka3	ENSRNOG00000006632	1.02311	1.31152e-05
Rnf122	ENSRNOG00000023473	1.02331	0.00394703
Polr1e	ENSRNOG00000012664	1.02795	8.48123e-08
Cyp2u1	ENSRNOG00000011053	1.02822	7.12071e-07
Tmem106a	ENSRNOG00000023628	1.02841	0.000107195
Nav2	ENSRNOG00000014530	1.02895	0.00197039
Slc25a33	ENSRNOG00000016949	1.02923	7.45381e-06
Arhgap1	ENSRNOG00000016610	1.03044	9.60668e-20
Zdhhc24	ENSRNOG00000019825	1.03197	0.00153898
Vps37d	ENSRNOG00000048699	1.03319	0.0395157
Prelid2	ENSRNOG00000054049	1.0356	0.000451534
Amot	ENSRNOG00000007345	1.03644	0.00588689
Trpv2	ENSRNOG00000003104	1.03803	0.000392885
Slc2a8	ENSRNOG00000022274	1.03807	3.56802e-05
AC108574.1	ENSRNOG00000057903	1.04161	7.49658e-06
Hexdc	ENSRNOG00000036667	1.04309	6.79189e-07
Mapk11	ENSRNOG00000006984	1.04353	0.00392767
Map7d2	ENSRNOG00000005176	1.0437	0.0275054
Tfrc	ENSRNOG00000001766	1.04413	1.78368e-05
Pyurf	ENSRNOG00000006858	1.0453	3.27087e-13
Pdia5	ENSRNOG00000032327	1.04648	3.99787e-05
Bhlhe40	ENSRNOG00000007152	1.04742	6.20151e-05
Cnksr1	ENSRNOG00000022838	1.04745	0.00108055
Xylt2	ENSRNOG00000003728	1.04763	7.75445e-23
Afmid	ENSRNOG00000050205	1.04804	3.06192e-05
Kif21b	ENSRNOG00000008471	1.04808	0.0100966
March9	ENSRNOG00000046245	1.04881	0.00488171
Ints6l	ENSRNOG00000046662	1.05053	0.0232832
Sesn2	ENSRNOG00000042785	1.05227	1.47249e-29
RGD1565033	ENSRNOG00000043295	1.05308	3.94735e-07
Gpr137b	ENSRNOG00000002480	1.05503	1.73246e-06
Ifi27	ENSRNOG00000009263	1.05722	0.000135102
Higd2a	ENSRNOG00000017372	1.05898	4.12647e-08
Rn60_1_2212.3	ENSRNOG00000062155	1.05969	0.020402
Cd80	ENSRNOG00000001527	1.06009	0.00202286
Pcgf5	ENSRNOG00000018532	1.06538	0.000220825
Palm	ENSRNOG00000009760	1.06564	2.37951e-07
Arl15	ENSRNOG00000011105	1.06578	0.0321888
Camta1	ENSRNOG00000018602	1.06772	0.00138398
LOC691931	ENSRNOG00000010875	1.06802	3.29006e-07
Laptm4b	ENSRNOG00000006766	1.06869	8.24858e-25
Actr3b	ENSRNOG00000031855	1.06995	5.65052e-05
B4galt3	ENSRNOG00000003551	1.07183	3.24359e-12
Spsb4	ENSRNOG00000012862	1.07196	1.75214e-08
Spata24	ENSRNOG00000019976	1.07207	0.0324548
Nsf	ENSRNOG00000003905	1.07216	5.95952e-08
Iqcb1	ENSRNOG00000038868	1.07536	0.00339622
Hs3st3b1	ENSRNOG00000003384	1.08336	0.011992
Tceanc	ENSRNOG00000004531	1.08458	0.0257101
Galc	ENSRNOG00000003759	1.08549	1.39661e-06
Frmd4a	ENSRNOG00000018500	1.08718	0.0098802
Ager	ENSRNOG00000000439	1.08745	0.00579414
Slc26a10	ENSRNOG00000029465	1.08997	0.0459686
Rec114	ENSRNOG00000009332	1.09096	0.000150966
Impact	ENSRNOG00000045844	1.09137	2.84117e-06
Myc	ENSRNOG00000004500	1.09425	0.00132977
Dph5	ENSRNOG00000013719	1.09497	1.84152e-06
Cib2	ENSRNOG00000059834	1.09722	0.00372053
Chst2	ENSRNOG00000047734	1.09752	1.47742e-09
Filip1l	ENSRNOG00000001645	1.09789	0.0396692
Unc13d	ENSRNOG00000007439	1.09868	0.000769338
Pygo1	ENSRNOG00000051813	1.1054	0.000151492
Gsta4	ENSRNOG00000030449	1.10608	0.0234215
Plod2	ENSRNOG00000030183	1.10689	1.66412e-06
Tgfbr3	ENSRNOG00000002093	1.1084	0.000285123
Dtna	ENSRNOG00000016671	1.1093	0.00043975
Efna3	ENSRNOG00000057322	1.10971	0.0455505
LOC100125367	ENSRNOG00000005558	1.11042	5.67309e-09
Ggta1	ENSRNOG00000019179	1.11075	1.04433e-10
Slc46a3	ENSRNOG00000000937	1.11341	3.16853e-05
Grtp1	ENSRNOG00000019504	1.11389	0.0478618
Ifit1bl	ENSRNOG00000036603	1.11403	0.00168244
Myl9	ENSRNOG00000020246	1.1148	0.026804
Grtp1	ENSRNOG00000061995	1.11521	0.0100852
Bves	ENSRNOG00000043199	1.11526	2.96047e-07
Tcn2	ENSRNOG00000004280	1.11629	1.62308e-07
Ddah2	ENSRNOG00000000842	1.11751	0.000667704
Dennd3	ENSRNOG00000010794	1.11804	1.10713e-08
Xylb	ENSRNOG00000014168	1.1183	5.91161e-23
Abcb6	ENSRNOG00000018697	1.11837	0.00380556
Slc25a35	ENSRNOG00000004668	1.11991	0.016467
Amz2	ENSRNOG00000000246	1.12361	8.43868e-28
Adgre5	ENSRNOG00000004489	1.12369	3.17446e-06
H2afj	ENSRNOG00000033045	1.12452	4.07729e-05
Ddt	ENSRNOG00000001239	1.12495	4.4244e-06
Rn60_1_2212.2	ENSRNOG00000062127	1.12621	1.10569e-10
Slc19a1	ENSRNOG00000001232	1.12649	4.07642e-16
Sdsl	ENSRNOG00000001391	1.12721	0.0134761
LOC100911625	ENSRNOG00000048365	1.12918	0.00747722
BC028528	ENSRNOG00000059750	1.1295	0.0170151
Cdc42ep3	ENSRNOG00000032136	1.13022	5.56228e-05
Aldoa	ENSRNOG00000052802	1.13343	1.54734e-15
Vegfc	ENSRNOG00000011416	1.134	0.0096098
Dnajb5	ENSRNOG00000000130	1.13609	5.2925e-24
Pawr	ENSRNOG00000005917	1.1382	2.31644e-09
Amt	ENSRNOG00000050214	1.13906	0.0236758
Cemip	ENSRNOG00000012442	1.14161	0.0304148
Tfpi	ENSRNOG00000005039	1.14485	0.0010837
B4galt4	ENSRNOG00000003114	1.14792	4.541e-08
Zmym6	ENSRNOG00000013865	1.14861	1.03568e-08
Klf11	ENSRNOG00000054259	1.14866	6.6654e-07
Bcl2l11	ENSRNOG00000016551	1.14924	1.69847e-09
Btbd8	ENSRNOG00000023446	1.15291	0.00010522
Pvt1	ENSRNOG00000062170	1.15462	3.22555e-17
Gp1bb	ENSRNOG00000029912	1.15544	4.12287e-08
Fcrlb	ENSRNOG00000003135	1.15741	0.0116589
Grb14	ENSRNOG00000052498	1.15757	1.58797e-05
Plat	ENSRNOG00000019018	1.15868	6.84327e-12
Ube2e2	ENSRNOG00000032690	1.15899	0.000909807
Kyat1	ENSRNOG00000016097	1.16259	8.55637e-08
Blvra	ENSRNOG00000011778	1.16264	0.00408188
Tmem63b	ENSRNOG00000019743	1.16314	1.40704e-10
Thra	ENSRNOG00000009066	1.16805	3.42128e-16
Il6r	ENSRNOG00000020811	1.16933	2.30175e-07
Pinlyp	ENSRNOG00000019862	1.17025	0.0200564
C1qtnf2	ENSRNOG00000003870	1.17445	5.60524e-05
Sdf2l1	ENSRNOG00000001859	1.17459	8.83086e-06
Lrrc27	ENSRNOG00000017538	1.17484	0.000277748
Ifi27l2b	ENSRNOG00000026605	1.17547	0.000458601
Lgmn	ENSRNOG00000007089	1.17601	4.59634e-10
Ccne1	ENSRNOG00000014786	1.17748	9.8853e-07
Neu1	ENSRNOG00000032942	1.17815	3.96388e-16
Fas	ENSRNOG00000019142	1.17859	1.91786e-06
Hadh	ENSRNOG00000010697	1.18157	1.80863e-07
Mcc	ENSRNOG00000011271	1.18669	0.0220853
Cdkl2	ENSRNOG00000002506	1.18972	3.01937e-10
Otub2	ENSRNOG00000009117	1.19006	5.50804e-10
Prpsap1	ENSRNOG00000010083	1.19038	7.44237e-09
Tmem14a	ENSRNOG00000013238	1.19048	5.41595e-06
Cdc42bpg	ENSRNOG00000027456	1.19182	0.00142107
Cish	ENSRNOG00000029543	1.19218	0.000521143
Tigd2	ENSRNOG00000038449	1.1948	2.0207e-07
Mmp28	ENSRNOG00000047940	1.19558	0.000662609
LOC103694864	ENSRNOG00000061904	1.19558	0.000662609
Ctsh	ENSRNOG00000014064	1.19916	0.00879264
Gys1	ENSRNOG00000020812	1.20298	8.81749e-18
Hspb2	ENSRNOG00000010402	1.20346	4.77514e-05
Prom2	ENSRNOG00000014710	1.20455	0.0378563
Dyrk2	ENSRNOG00000007821	1.2062	3.0674e-07
Bmper	ENSRNOG00000015357	1.20698	7.17913e-11
Uqcrfs1	ENSRNOG00000018281	1.20744	1.42015e-28
Itpka	ENSRNOG00000005284	1.21044	0.0397775
Dmd	ENSRNOG00000046366	1.21325	5.86038e-08
AABR07006367.1	ENSRNOG00000005112	1.21429	0.0470921
Dhtkd1	ENSRNOG00000023587	1.22947	8.82617e-05
Emilin2	ENSRNOG00000014837	1.23014	0.00313408
Pdk2	ENSRNOG00000004172	1.23024	1.89775e-11
Adh7	ENSRNOG00000032959	1.23096	7.03418e-11
AABR07054189.1	ENSRNOG00000033100	1.23394	0.0042624
Gpr88	ENSRNOG00000026953	1.23528	0.0112463
Plxnd1	ENSRNOG00000025209	1.24007	0.0022786
Alas1	ENSRNOG00000056596	1.24082	3.52238e-09
Prss23	ENSRNOG00000017307	1.24086	0.00202343
Tbx18	ENSRNOG00000010685	1.24447	8.86423e-11
Fndc4	ENSRNOG00000051056	1.24452	1.56695e-09
Trim29	ENSRNOG00000021771	1.24515	0.00666596
Sh3rf1	ENSRNOG00000010358	1.24616	4.41159e-11
Mmp16	ENSRNOG00000005708	1.24628	0.00112875
Mettl7a	ENSRNOG00000001376	1.24728	4.53503e-12
Fbn1	ENSRNOG00000007302	1.24855	0.000276978
Gpc6	ENSRNOG00000046660	1.25063	0.000639219
Slc19a2	ENSRNOG00000002839	1.25133	8.98313e-11
Fsd1	ENSRNOG00000050318	1.25224	0.0097445
Gcnt2	ENSRNOG00000023778	1.25323	0.00222832
Rn50_11_0375.8	ENSRNOG00000049380	1.25639	0.0130284
Zfpm2	ENSRNOG00000004109	1.25704	4.75277e-11
Ero1b	ENSRNOG00000002609	1.2577	1.25821e-09
Dync2li1	ENSRNOG00000005151	1.25786	3.36226e-07
Wrb	ENSRNOG00000001629	1.25877	8.6264e-42
LOC100909849	ENSRNOG00000059244	1.25934	1.59452e-08
Fzd8	ENSRNOG00000061031	1.25934	1.59452e-08
Trappc2	ENSRNOG00000042276	1.26161	3.38198e-05
Tinagl1	ENSRNOG00000013179	1.26425	4.11293e-35
Lilrb3l	ENSRNOG00000058422	1.26727	0.0241771
Naaa	ENSRNOG00000002273	1.26949	0.0406526
Pum3	ENSRNOG00000012574	1.27203	4.23504e-12
Tom1l1	ENSRNOG00000002474	1.27412	1.60056e-11
Wipi1	ENSRNOG00000003827	1.27493	5.25917e-09
Abca1	ENSRNOG00000018126	1.27619	0.00201306
Cped1	ENSRNOG00000021840	1.27813	0.00473149
Pkia	ENSRNOG00000012095	1.27829	0.000349186
AC126572.3	ENSRNOG00000059466	1.282	0.00292537
Cyp4f1	ENSRNOG00000004786	1.2845	0.0314716
Adamts4	ENSRNOG00000003538	1.28766	0.0269712
Slc35c2	ENSRNOG00000018649	1.29484	5.97469e-26
Pou6f1	ENSRNOG00000004595	1.29679	0.0449033
LOC100910163	ENSRNOG00000047977	1.29841	1.00193e-08
Matn2	ENSRNOG00000006060	1.29866	0.0045529
Cr1l	ENSRNOG00000008193	1.30069	6.11511e-18
Cacna1i	ENSRNOG00000060407	1.3007	0.0216665
Glb1l	ENSRNOG00000019243	1.30286	1.71882e-05
LOC681292	ENSRNOG00000021268	1.3062	0.0329219
Tbx2	ENSRNOG00000003517	1.30674	0.00917
Crim1	ENSRNOG00000004208	1.307	5.98148e-06
Ptger4	ENSRNOG00000013240	1.30873	0.0119956
Dennd2c	ENSRNOG00000018716	1.31105	9.57893e-08
Dhx40	ENSRNOG00000004549	1.31139	2.47727e-14
Tp53inp1	ENSRNOG00000007964	1.31627	0.0187475
Akap2	ENSRNOG00000011504	1.31709	1.81723e-05
Mr1	ENSRNOG00000003522	1.3191	0.00300494
Mapk8ip1	ENSRNOG00000058478	1.32717	2.13023e-10
Sh3tc1	ENSRNOG00000007993	1.32964	0.0121981
Appl2	ENSRNOG00000008174	1.33138	7.70876e-16
Nipal2	ENSRNOG00000005190	1.33388	0.00285375
Rpp25	ENSRNOG00000018812	1.33808	3.25243e-14
Tm2d1	ENSRNOG00000007527	1.33832	4.41575e-08
Hist1h3a	ENSRNOG00000046144	1.33853	0.0358394
Bnip3	ENSRNOG00000017243	1.34181	6.60286e-21
Grhl2	ENSRNOG00000007000	1.3425	0.0317024
Gjc2	ENSRNOG00000038328	1.34501	0.0320429
AABR07060862.1	ENSRNOG00000053679	1.34715	0.00500474
Nsun4	ENSRNOG00000046192	1.34763	8.68812e-05
Casc1	ENSRNOG00000027630	1.3485	0.00417171
Fhl2	ENSRNOG00000016866	1.35079	3.86336e-11
Plxnb1	ENSRNOG00000029510	1.35187	0.00633439
Ncald	ENSRNOG00000042978	1.35672	0.00183227
Cyp4f37	ENSRNOG00000048450	1.35712	0.0363186
Col4a6	ENSRNOG00000056772	1.36036	0.0057673
Snx30	ENSRNOG00000017132	1.36192	1.72957e-05
Glipr1	ENSRNOG00000026644	1.36355	9.75083e-07
LOC290595	ENSRNOG00000043342	1.36378	0.0236077
Mfsd2a	ENSRNOG00000014008	1.36555	0.00309909
Inpp5a	ENSRNOG00000017635	1.36611	1.06176e-20
Arhgap45	ENSRNOG00000013220	1.3664	0.00113272
LOC102553018	ENSRNOG00000057834	1.3674	0.00832563
Lmod1	ENSRNOG00000051548	1.36899	4.94952e-19
Fam214a	ENSRNOG00000058522	1.37004	6.46347e-07
LOC103694877	ENSRNOG00000006589	1.37373	3.72025e-11
Mif	ENSRNOG00000056076	1.37373	3.72025e-11
Gpr63	ENSRNOG00000007675	1.3739	0.0350011
Gramd1b	ENSRNOG00000053577	1.37472	1.10262e-13
Adgrb2	ENSRNOG00000014375	1.3774	0.0184474
Fgf1	ENSRNOG00000013867	1.38562	0.00538328
Ptges3l	ENSRNOG00000050347	1.38782	4.6536e-10
Slc45a4	ENSRNOG00000007818	1.39195	0.0209352
Gaa	ENSRNOG00000047656	1.39225	8.32264e-49
RGD1308750	ENSRNOG00000048356	1.39533	0.000110319
Ehbp1	ENSRNOG00000008917	1.40174	1.87728e-17
Chst12	ENSRNOG00000001252	1.40324	1.7127e-09
Ust	ENSRNOG00000016381	1.40342	1.56604e-07
Smoc1	ENSRNOG00000005998	1.40647	0.00552736
Mkrn3	ENSRNOG00000010172	1.40663	1.18869e-06
Zfp608	ENSRNOG00000023197	1.40667	4.44143e-07
Fmo4	ENSRNOG00000003400	1.41023	0.000737078
Gstk1	ENSRNOG00000016484	1.41539	0.000198299
Ndrg4	ENSRNOG00000012482	1.41599	1.75575e-08
Frrs1	ENSRNOG00000016351	1.42613	2.20582e-15
Cobl	ENSRNOG00000004281	1.42697	1.92387e-17
Ccdc189	ENSRNOG00000053015	1.4283	0.0481956
Palmd	ENSRNOG00000058609	1.4334	0.00281661
Rasl11b	ENSRNOG00000002097	1.43947	3.87164e-12
Vps25	ENSRNOG00000051179	1.43979	1.04611e-20
Dmrt3	ENSRNOG00000016284	1.44294	9.79192e-16
Arnt2	ENSRNOG00000013017	1.44836	2.35557e-08
Zeb2	ENSRNOG00000004677	1.44876	7.08567e-05
Rnf157	ENSRNOG00000049862	1.44916	0.000471147
Aif1l	ENSRNOG00000009951	1.45035	0.000168082
Fam83h	ENSRNOG00000030264	1.45109	0.00399479
Tex13b	ENSRNOG00000058904	1.45261	0.00580008
Arf2	ENSRNOG00000004807	1.45407	1.54655e-18
Psd	ENSRNOG00000019435	1.45413	1.98566e-07
Pkig	ENSRNOG00000010235	1.45784	2.40066e-14
Jup	ENSRNOG00000015380	1.45914	2.42822e-11
Prkca	ENSRNOG00000003491	1.46127	9.43687e-07
Plac9	ENSRNOG00000011263	1.46202	0.00155394
Sema4b	ENSRNOG00000025167	1.46334	5.47077e-10
Gata6	ENSRNOG00000023433	1.46586	1.62122e-15
Nid1	ENSRNOG00000002461	1.46661	1.64924e-06
Zmynd15	ENSRNOG00000019477	1.46892	0.010826
Deptor	ENSRNOG00000004328	1.47137	0.00115842
Acer2	ENSRNOG00000007637	1.47325	0.00537829
Fam213b	ENSRNOG00000013468	1.47517	0.00742859
Col12a1	ENSRNOG00000058470	1.47697	0.000759863
Tmem151a	ENSRNOG00000049951	1.47781	6.47256e-13
Chst10	ENSRNOG00000012815	1.47929	0.0144992
Nox1	ENSRNOG00000048706	1.48048	0.0158519
Prune2	ENSRNOG00000015088	1.48156	2.5589e-05
Brsk1	ENSRNOG00000017673	1.48239	0.0233314
Cpeb2	ENSRNOG00000005043	1.48321	0.000779981
Hist2h3c2	ENSRNOG00000049198	1.48825	0.000902341
LOC103690007	ENSRNOG00000012020	1.49691	6.53793e-07
Engase	ENSRNOG00000027498	1.49996	2.62947e-14
Flvcr2	ENSRNOG00000008754	1.5044	0.000517209
Cables1	ENSRNOG00000012795	1.50939	0.000274952
Apbb1ip	ENSRNOG00000017803	1.50995	3.86639e-05
Bst1	ENSRNOG00000003064	1.51065	0.000344403
AABR07059159.1	ENSRNOG00000061925	1.51177	0.00333833
Six3	ENSRNOG00000057031	1.51412	2.52936e-06
Slc2a1	ENSRNOG00000007284	1.51675	3.63672e-06
Ksr1	ENSRNOG00000012818	1.51709	2.97777e-07
Gyg1	ENSRNOG00000011146	1.51839	1.52856e-23
Ift57	ENSRNOG00000001958	1.52136	3.8572e-16
Zfyve28	ENSRNOG00000014874	1.52632	1.33795e-05
RGD1311744	ENSRNOG00000005960	1.52865	1.12945e-12
Akr1e2	ENSRNOG00000017165	1.52991	2.87462e-10
Celsr3	ENSRNOG00000053889	1.53229	1.47212e-07
Ankrd37	ENSRNOG00000031335	1.53443	9.77154e-06
Arid3b	ENSRNOG00000019677	1.53476	2.99169e-08
Ccdc36	ENSRNOG00000048919	1.53636	1.48318e-11
Klhl30	ENSRNOG00000020105	1.54113	2.50673e-06
Myh11	ENSRNOG00000057880	1.54341	9.85681e-33
Rhob	ENSRNOG00000021403	1.5449	2.65681e-36
Slc2a10	ENSRNOG00000025384	1.54579	3.88343e-06
Palm2	ENSRNOG00000025558	1.54749	8.89606e-05
Pcdhb22	ENSRNOG00000020028	1.5489	0.0047158
Hmox1	ENSRNOG00000014117	1.54911	4.38509e-25
Trpm1	ENSRNOG00000015829	1.55126	0.0470595
Pacsin1	ENSRNOG00000054603	1.55236	0.000797701
Cradd	ENSRNOG00000008507	1.55243	0.0148567
Col14a1	ENSRNOG00000026415	1.55388	0.0012016
Kifc2	ENSRNOG00000060123	1.5539	0.000500373
Htr2a	ENSRNOG00000010063	1.55516	2.03323e-06
Akr1c13	ENSRNOG00000050040	1.56054	0.00492889
Whrn	ENSRNOG00000001700	1.57428	0.000165469
Ankrd36	ENSRNOG00000056767	1.57512	8.7768e-07
Tnfsf15	ENSRNOG00000008930	1.57571	2.34938e-05
Mgmt	ENSRNOG00000016038	1.57686	9.11615e-11
Tbc1d9	ENSRNOG00000003496	1.58961	1.17845e-06
Rdh5	ENSRNOG00000053850	1.5897	4.71085e-07
Slc44a2	ENSRNOG00000031824	1.60252	5.24122e-07
Cenpv	ENSRNOG00000003086	1.60307	4.14676e-07
Dpep2	ENSRNOG00000023303	1.60975	2.55751e-10
Mxra7	ENSRNOG00000042915	1.61088	0.000902341
Pde3b	ENSRNOG00000011417	1.61135	0.000861297
Serf1	ENSRNOG00000017945	1.61579	5.20763e-05
Pde3a	ENSRNOG00000025042	1.62075	0.000274453
Padi3	ENSRNOG00000006950	1.62121	0.00134461
Dusp23	ENSRNOG00000022143	1.62436	0.0221272
Efna2	ENSRNOG00000016203	1.62783	4.51537e-05
AABR07065139.1	ENSRNOG00000053311	1.63033	0.0213285
Pcdha4	ENSRNOG00000020119	1.63049	2.89776e-06
Bace1	ENSRNOG00000016847	1.63171	5.13411e-05
Ophn1	ENSRNOG00000026573	1.63279	2.72089e-09
MAST1	ENSRNOG00000003469	1.63459	1.28892e-05
Ogfod3	ENSRNOG00000036668	1.63498	1.48562e-19
Inpp5d	ENSRNOG00000017020	1.63607	0.00102495
Zfr2	ENSRNOG00000020416	1.63636	1.19387e-11
Narf	ENSRNOG00000036664	1.63777	3.1726e-13
Stmn4	ENSRNOG00000053334	1.63782	0.0175633
As3mt	ENSRNOG00000020081	1.63804	0.0236181
Kif27	ENSRNOG00000019257	1.63926	3.42415e-07
Hoxb5	ENSRNOG00000008010	1.64012	0.0143962
Sarm1	ENSRNOG00000010244	1.64595	0.0326312
Snai2	ENSRNOG00000047699	1.65154	7.62326e-16
H2afy2	ENSRNOG00000024751	1.65196	0.0291078
Rn50_X_0729.6	ENSRNOG00000045779	1.65556	2.08624e-15
Adamtsl1	ENSRNOG00000006956	1.66025	0.0430099
RGD1562378	ENSRNOG00000051891	1.66525	0.0120021
Mmp13	ENSRNOG00000008478	1.67064	2.25041e-08
Trim7	ENSRNOG00000002469	1.67316	0.00107044
Sema6b	ENSRNOG00000045998	1.67636	0.000377948
Txnip	ENSRNOG00000021201	1.67659	1.12593e-15
Zwint	ENSRNOG00000048682	1.68121	3.92455e-31
Eno2	ENSRNOG00000013141	1.68166	1.38807e-11
Slc30a3	ENSRNOG00000006204	1.6837	0.00805773
Btg1	ENSRNOG00000004284	1.68484	6.01203e-10
Mrgprf	ENSRNOG00000013426	1.68516	3.58932e-06
Jag1	ENSRNOG00000007443	1.68522	2.61307e-06
Lgalsl	ENSRNOG00000005464	1.68902	1.98931e-24
Napb	ENSRNOG00000004753	1.69537	0.000139436
Lgals3bp	ENSRNOG00000003217	1.7056	3.01663e-13
Esr1	ENSRNOG00000019358	1.70634	0.00408305
Etfbkmt	ENSRNOG00000036918	1.71091	1.32012e-08
Id4	ENSRNOG00000016099	1.71644	3.6806e-14
Bmyc	ENSRNOG00000042556	1.71693	0.0039908
Cidea	ENSRNOG00000018505	1.72166	0.000365678
Tmc8	ENSRNOG00000046086	1.72402	0.0313536
Fbxl22	ENSRNOG00000017684	1.72416	0.0153464
Tspan17	ENSRNOG00000018122	1.72418	9.57893e-08
Fam221a	ENSRNOG00000009447	1.72598	0.00344049
Angpt1	ENSRNOG00000005854	1.72952	0.00628037
Fbxo32	ENSRNOG00000006738	1.73084	0.00037291
St3gal1	ENSRNOG00000008209	1.73238	4.31213e-18
Chst11	ENSRNOG00000008885	1.7342	8.14468e-13
Pcdhb2	ENSRNOG00000039476	1.74364	0.000246108
Crb2	ENSRNOG00000025498	1.74666	0.000171399
Hist2h3c2	ENSRNOG00000050478	1.74694	3.1279e-06
Cp	ENSRNOG00000011913	1.75059	0.00164841
Adam33	ENSRNOG00000021242	1.75533	3.90132e-10
Nxf7	ENSRNOG00000023256	1.75646	0.0309105
Hagh	ENSRNOG00000014743	1.7576	2.67145e-23
Hist2h3c2	ENSRNOG00000060366	1.76079	0.0143575
Ak4	ENSRNOG00000045738	1.76539	1.2338e-05
Plekhh1	ENSRNOG00000010650	1.76918	0.00908948
Bambi	ENSRNOG00000016066	1.77443	0.000265543
Tmem204	ENSRNOG00000016494	1.77793	0.00274704
Card14	ENSRNOG00000047367	1.79137	2.26832e-07
Lrrcc1	ENSRNOG00000010891	1.79379	1.74143e-25
Elovl4	ENSRNOG00000009773	1.79515	0.0429193
Rufy4	ENSRNOG00000032991	1.80109	0.00964605
Gstt1	ENSRNOG00000049771	1.81871	8.19585e-08
AABR07051947.1	ENSRNOG00000039025	1.81898	0.00725841
Btbd3	ENSRNOG00000008088	1.82141	2.71331e-08
Ms4a6c	ENSRNOG00000047349	1.82284	0.0206155
Pomc	ENSRNOG00000012686	1.82587	0.0121981
Itga2b	ENSRNOG00000022071	1.82876	0.00907868
Tmem79	ENSRNOG00000019414	1.83487	0.00158594
Tlr7	ENSRNOG00000004249	1.84171	0.00794772
Colq	ENSRNOG00000019615	1.84456	0.00154452
Akap1	ENSRNOG00000002373	1.85037	5.07114e-75
Cds1	ENSRNOG00000002142	1.85108	0.00693264
Ccdc141	ENSRNOG00000012580	1.85222	3.27357e-08
Upp1	ENSRNOG00000004972	1.85842	1.32869e-19
Ptgis	ENSRNOG00000008245	1.85879	9.41804e-09
Ceacam4	ENSRNOG00000046222	1.86076	0.0138405
Itpkb	ENSRNOG00000002969	1.86242	0.000428824
Itgb1bp2	ENSRNOG00000003596	1.86323	0.00439953
SCARNA2	ENSRNOG00000051850	1.87019	0.000187118
Asb12	ENSRNOG00000004197	1.87037	3.621e-06
Entpd2	ENSRNOG00000013102	1.87056	0.00109379
Anxa3	ENSRNOG00000002045	1.87825	4.72139e-06
	ENSRNOG00000051069	1.88569	0.000639141
Ddah1	ENSRNOG00000014613	1.89176	1.28616e-06
Zfp2	ENSRNOG00000030750	1.89196	0.00578981
Cyfip2	ENSRNOG00000006557	1.89771	7.42441e-07
Pnpla7	ENSRNOG00000008190	1.90245	3.89455e-11
Bcl2	ENSRNOG00000002791	1.90753	1.03238e-20
Rapsn	ENSRNOG00000011208	1.90784	6.52316e-13
Cxcl12	ENSRNOG00000013589	1.90847	2.04185e-16
Podxl2	ENSRNOG00000016255	1.91561	6.07085e-18
Cdhr2	ENSRNOG00000017917	1.91941	0.00269384
Adamts15	ENSRNOG00000009892	1.92423	1.95319e-05
Samd5	ENSRNOG00000023549	1.92441	3.02446e-07
Slc38a6	ENSRNOG00000022622	1.92517	1.02459e-12
Ccdc30	ENSRNOG00000008560	1.9278	0.0364487
Sept4	ENSRNOG00000007367	1.92831	0.00853442
Cdh17	ENSRNOG00000015562	1.93261	0.000646501
Slc35f2	ENSRNOG00000009014	1.93509	5.85295e-17
Sorbs1	ENSRNOG00000015658	1.95369	1.88112e-06
Slc40a1	ENSRNOG00000003872	1.95501	5.61509e-09
Lilrb3a	ENSRNOG00000053260	1.95674	0.000133754
Rn50_X_0691.2	ENSRNOG00000051080	1.95718	0.00124903
Gprin3	ENSRNOG00000023657	1.95841	0.00370823
Fam212b	ENSRNOG00000015691	1.96438	0.0183255
AABR07065031.1	ENSRNOG00000047682	1.96847	0.0262312
N4bp2l1	ENSRNOG00000059322	1.96847	0.00696578
Scg2	ENSRNOG00000015055	1.97307	0.0045362
Folr1	ENSRNOG00000019902	1.9739	0.0245914
RGD1562660	ENSRNOG00000054246	1.97453	4.75547e-07
Mapt	ENSRNOG00000005133	1.97571	0.0111065
Inhbb	ENSRNOG00000060237	1.98313	4.32546e-36
Angptl4	ENSRNOG00000007545	1.99054	1.53846e-06
AC105662.1	ENSRNOG00000042062	1.99408	0.0459686
AC098459.2	ENSRNOG00000053343	1.99536	0.0335509
Psen2	ENSRNOG00000002879	2.00325	2.5629e-15
Rarb	ENSRNOG00000024061	2.00618	2.05937e-08
Magi2	ENSRNOG00000013962	2.00624	0.000197964
Tle4	ENSRNOG00000013239	2.02663	2.28728e-18
Nlrp3	ENSRNOG00000003170	2.05886	0.00128895
Wdfy4	ENSRNOG00000029662	2.06179	0.000928648
LOC102553785	ENSRNOG00000025200	2.06297	0.00269058
Rn50_1_0430.2	ENSRNOG00000055166	2.06346	0.0194087
RGD1310507	ENSRNOG00000009434	2.06721	0.00182975
Cfap52	ENSRNOG00000037718	2.06943	0.0462253
AC128353.1	ENSRNOG00000046711	2.07243	0.0415303
Adarb1	ENSRNOG00000001227	2.07282	7.35704e-23
Il6	ENSRNOG00000010278	2.07479	0.00419661
Plpp7	ENSRNOG00000010068	2.079	3.88248e-11
Acta2	ENSRNOG00000058039	2.08402	1.92629e-23
RGD1564899	ENSRNOG00000049942	2.09209	1.91119e-05
Fndc1	ENSRNOG00000030210	2.0949	0.00322252
Ccl7	ENSRNOG00000000239	2.09724	0.00947517
Cacna1g	ENSRNOG00000060528	2.09775	3.41054e-09
Errfi1	ENSRNOG00000058186	2.09958	1.18246e-13
Ppp1r3b	ENSRNOG00000011474	2.10005	2.71878e-13
Galnt6	ENSRNOG00000033059	2.10579	7.63965e-10
Csf1r	ENSRNOG00000018414	2.10761	0.00763063
Wfdc8	ENSRNOG00000014771	2.11296	0.000363999
RGD1562618	ENSRNOG00000026238	2.12374	2.19598e-44
Gp1bb	ENSRNOG00000046981	2.12492	0.0272172
Klhl32	ENSRNOG00000007441	2.13493	0.0031017
snoU85	ENSRNOG00000060559	2.14082	0.011894
AABR07043389.1	ENSRNOG00000052109	2.15929	0.0155109
Galnt13	ENSRNOG00000005335	2.16276	3.81162e-15
Il33	ENSRNOG00000016456	2.1645	0.000357791
Agpat5	ENSRNOG00000028623	2.16549	5.94319e-45
AABR07053509.2	ENSRNOG00000059260	2.16608	0.0197002
Faxc	ENSRNOG00000010106	2.17003	6.01203e-10
Vldlr	ENSRNOG00000027491	2.1709	1.47079e-11
AABR07002001.1	ENSRNOG00000058538	2.18962	0.00174016
Dhrs7	ENSRNOG00000005589	2.19406	3.01792e-33
Hunk	ENSRNOG00000002092	2.19755	2.02178e-05
Rgs3	ENSRNOG00000024501	2.20716	6.40764e-22
Olfml2b	ENSRNOG00000003018	2.21053	1.30805e-34
Efr3b	ENSRNOG00000012950	2.21113	5.0237e-05
Arrdc4	ENSRNOG00000010775	2.22056	6.92983e-11
Igfbp7	ENSRNOG00000002050	2.22316	1.35033e-09
Elavl2	ENSRNOG00000006853	2.22488	0.000193694
Rbpms	ENSRNOG00000013328	2.23109	6.0925e-12
Myocd	ENSRNOG00000003669	2.23109	3.29422e-08
Dcn	ENSRNOG00000004554	2.23413	1.07749e-06
AABR07045680.1	ENSRNOG00000056040	2.24535	0.00246663
Tmem184a	ENSRNOG00000001275	2.24587	6.98591e-05
Fam131c	ENSRNOG00000023008	2.24747	0.0401025
Eda2r	ENSRNOG00000013018	2.24761	0.000318579
Msl3l2	ENSRNOG00000000801	2.25767	0.000195285
Ccdc80	ENSRNOG00000002052	2.25788	1.27306e-45
Pm20d1	ENSRNOG00000039745	2.25895	6.30043e-09
Lmcd1	ENSRNOG00000005690	2.26174	0.00408458
Slc2a9	ENSRNOG00000005302	2.26186	1.2213e-06
Hey2	ENSRNOG00000013364	2.27267	7.55615e-25
Mpzl2	ENSRNOG00000016085	2.27348	2.80514e-19
Prickle2	ENSRNOG00000012364	2.27799	6.88366e-26
Wwc1	ENSRNOG00000008065	2.28356	0.00212768
Clec3b	ENSRNOG00000004540	2.29804	0.000209988
Il1rn	ENSRNOG00000005871	2.30167	0.0254128
Itgb3	ENSRNOG00000048449	2.30187	2.46708e-05
Rgs7bp	ENSRNOG00000013389	2.30468	0.000115298
Nexn	ENSRNOG00000012512	2.30473	1.04339e-09
LOC100359930	ENSRNOG00000028852	2.30898	1.95511e-06
Sapcd1	ENSRNOG00000000858	2.31401	2.41613e-06
Selenop	ENSRNOG00000053086	2.31654	0.0263711
Gbp3	ENSRNOG00000036885	2.34099	0.00747918
Ppp1r12b	ENSRNOG00000051440	2.34106	1.20942e-09
Pianp	ENSRNOG00000017052	2.34133	0.00145235
Dnajc12	ENSRNOG00000051960	2.34223	3.2676e-11
Nipal1	ENSRNOG00000025882	2.34688	2.14418e-05
Pcdhb21	ENSRNOG00000033479	2.34746	5.82933e-07
Matk	ENSRNOG00000020431	2.34885	0.0430269
Map2k6	ENSRNOG00000004437	2.35409	2.02534e-14
Daam1	ENSRNOG00000004345	2.36089	6.99338e-81
Spata6l	ENSRNOG00000015137	2.36663	0.00755083
Grm4	ENSRNOG00000000487	2.37515	6.99431e-07
Mnda	ENSRNOG00000003486	2.37665	1.33932e-24
Sept6	ENSRNOG00000043182	2.38686	2.15576e-06
Gbp1	ENSRNOG00000023943	2.38869	0.0207022
Csgalnact1	ENSRNOG00000013024	2.38918	1.05257e-31
Fam78a	ENSRNOG00000023352	2.39042	0.00265652
LOC100911932	ENSRNOG00000020197	2.39375	0.000796246
Sox5	ENSRNOG00000027869	2.39543	1.89112e-09
Rhd	ENSRNOG00000017130	2.39697	0.0463702
Cotl1	ENSRNOG00000016257	2.40197	0.0069431
Ntn4	ENSRNOG00000005573	2.40511	3.50569e-08
Fam217b	ENSRNOG00000053607	2.40757	7.90326e-09
Slc7a2	ENSRNOG00000011016	2.42657	1.68183e-07
Tmem86a	ENSRNOG00000013663	2.42857	6.19844e-06
Axin2	ENSRNOG00000055010	2.43238	1.58497e-15
Fos	ENSRNOG00000008015	2.44439	9.86099e-14
Sema3d	ENSRNOG00000007202	2.46199	2.2876e-05
Upk3b	ENSRNOG00000023686	2.46356	2.89136e-09
Kcna4	ENSRNOG00000004918	2.46432	0.00956295
Zfp483	ENSRNOG00000014975	2.46863	0.00335631
[truncated: 275 more rows]

## Sheet: D KD vs D Ctr
Gene.name	Ensembl	log2.Fold.Change	padj.value
Rbm12	ENSRNOG00000049913	-8.68908	4.59955e-07
LOC100909505	ENSRNOG00000047350	-8.54091	3.64069e-06
Sbk1	ENSRNOG00000019082	-8.31187	2.66719e-06
LOC102549115	ENSRNOG00000046867	-8.27346	0.0196679
Tnks2	ENSRNOG00000059776	-7.90363	0.000943198
AABR07035375.1	ENSRNOG00000046761	-5.97137	0.0157434
LOC100911692	ENSRNOG00000050158	-4.73425	0.012964
Ak4	ENSRNOG00000045738	-2.86343	3.76248e-11
Hist2h2be	ENSRNOG00000045753	-2.6901	0.00914027
Zfp804a	ENSRNOG00000038004	-2.38599	0.000664798
Rab15	ENSRNOG00000007364	-2.19415	0.0376814
Kdm7a	ENSRNOG00000052445	-2.08289	0.00667112
Zswim5	ENSRNOG00000018160	-2.04157	0.0390921
Mgarp	ENSRNOG00000011923	-1.95257	0.00712606
Mir199a2	ENSRNOG00000029459	-1.74397	0.0190079
Gja3	ENSRNOG00000008847	-1.54437	0.0106228
Arnt2	ENSRNOG00000013017	-1.53886	5.12405e-08
AABR07050487.1	ENSRNOG00000054768	-1.53552	0.00427169
Jarid2	ENSRNOG00000045918	-1.52412	4.2414e-06
Plxnb1	ENSRNOG00000029510	-1.50152	0.00909218
Mgat3	ENSRNOG00000017434	-1.49724	0.0194768
Kbtbd8	ENSRNOG00000013390	-1.48254	1.25731e-05
LOC102552166	ENSRNOG00000049489	-1.48181	0.0135063
Itgb8	ENSRNOG00000006569	-1.47929	0.0294764
Amigo1	ENSRNOG00000045665	-1.44889	0.0331533
Ankrd52	ENSRNOG00000030597	-1.43659	1.10679e-06
Cpeb3	ENSRNOG00000020689	-1.42608	0.0196923
Ptbp3	ENSRNOG00000016334	-1.41957	0.00613025
Adam12	ENSRNOG00000018384	-1.41809	0.00813566
Hist1h2ail1	ENSRNOG00000046434	-1.41228	0.00613025
Nfatc2ip	ENSRNOG00000057384	-1.39738	1.61211e-05
Ube3b	ENSRNOG00000047219	-1.38307	6.86849e-06
Hap1	ENSRNOG00000014819	-1.38226	1.61211e-05
Dnmt3b	ENSRNOG00000010625	-1.36275	0.0151268
Sptbn4	ENSRNOG00000055371	-1.35083	0.0291383
Tulp4	ENSRNOG00000018012	-1.28374	0.0304324
Ccdc92	ENSRNOG00000021691	-1.27316	1.92702e-06
Zfp704	ENSRNOG00000054426	-1.26073	0.0402463
Exoc6	ENSRNOG00000036601	-1.25557	0.000943198
Btbd3	ENSRNOG00000008088	-1.24229	0.00169606
Ints1	ENSRNOG00000022599	-1.22703	0.0469663
Rbpms	ENSRNOG00000013328	-1.21581	0.00237834
RGD1304884	ENSRNOG00000017431	-1.21089	0.00273927
Cnot6	ENSRNOG00000054891	-1.19806	0.00230278
AABR07059198.1	ENSRNOG00000040214	-1.18468	0.0100501
Snx30	ENSRNOG00000017132	-1.17943	0.00157102
Asb13	ENSRNOG00000017967	-1.1717	0.000501795
Mical2	ENSRNOG00000016244	-1.17157	0.000943198
Mtor	ENSRNOG00000009615	-1.16815	7.38014e-10
Entpd4	ENSRNOG00000016321	-1.1441	1.4292e-08
Prrc2b	ENSRNOG00000010217	-1.13171	0.0304688
Phlpp2	ENSRNOG00000016108	-1.12388	0.0211039
Pde5a	ENSRNOG00000014443	-1.11518	0.0331533
Peak1	ENSRNOG00000042519	-1.10794	0.0211039
Cmtm4	ENSRNOG00000011009	-1.10626	0.0143163
Epg5	ENSRNOG00000052894	-1.10291	0.0479533
Epm2aip1	ENSRNOG00000043006	-1.0931	5.48069e-07
Slc19a1	ENSRNOG00000001232	-1.09127	1.75819e-13
Epb41l5	ENSRNOG00000002538	-1.08276	0.00347258
Inpp5j	ENSRNOG00000019361	-1.08147	0.0499547
NEWGENE_1559832	ENSRNOG00000045695	-1.08065	0.000368776
Slc19a2	ENSRNOG00000002839	-1.07808	4.62874e-07
Fam171b	ENSRNOG00000004783	-1.07575	0.0139205
Hmbox1	ENSRNOG00000013326	-1.06338	0.00331155
Dst	ENSRNOG00000012207	-1.0548	0.0245025
Gnptab	ENSRNOG00000005228	-1.05475	0.00328335
Zfp113	ENSRNOG00000001341	-1.05425	0.0363396
Mmd	ENSRNOG00000002436	-1.05301	1.21034e-09
Vash1	ENSRNOG00000010457	-1.0516	0.0113117
Sh3d19	ENSRNOG00000011752	-1.05148	0.00606276
Ulk1	ENSRNOG00000037505	-1.04812	1.11297e-08
Gdpd1	ENSRNOG00000060561	-1.04723	0.00136145
Antxr2	ENSRNOG00000000081	-1.04398	0.00123153
Hipk2	ENSRNOG00000007034	-1.04247	0.000420979
Tarsl2	ENSRNOG00000024460	-1.03992	0.0265446
Aif1l	ENSRNOG00000009951	-1.03345	0.0325038
Arc	ENSRNOG00000043465	-1.03199	0.00121917
Pdzrn3	ENSRNOG00000057556	-1.02773	0.0243716
Nacc2	ENSRNOG00000018231	-1.02527	6.12453e-06
Pkia	ENSRNOG00000012095	-1.02457	0.019661
Lmln	ENSRNOG00000001781	-1.00902	0.00423898
Mex3a	ENSRNOG00000058654	-1.00364	0.0333414
Flt3lg	ENSRNOG00000056212	1.00961	0.00123859
Wdr34	ENSRNOG00000015636	1.01503	0.000871389
Tspo	ENSRNOG00000010549	1.01841	0.00013797
Upf3a	ENSRNOG00000017397	1.02301	6.09802e-05
	ENSRNOG00000046460	1.02498	0.00010899
Hsd11b1	ENSRNOG00000005861	1.02974	0.00180622
Ube2l6	ENSRNOG00000030467	1.03201	0.00212034
Ccdc34	ENSRNOG00000005902	1.03456	0.00663411
Cxcl1	ENSRNOG00000002802	1.03487	0.000815892
Dhrs1	ENSRNOG00000020264	1.03628	3.03429e-07
Phyhd1	ENSRNOG00000016794	1.04553	0.000995581
Arhgap45	ENSRNOG00000013220	1.0493	0.0275054
Slc22a17	ENSRNOG00000016414	1.06163	9.94782e-13
Cabp1	ENSRNOG00000001173	1.06891	0.0145207
P4ha2	ENSRNOG00000033663	1.0816	8.18219e-06
Duoxa1	ENSRNOG00000018005	1.08609	0.0376185
Psmb9	ENSRNOG00000000459	1.09006	0.00483309
Shpk	ENSRNOG00000019458	1.09143	4.68908e-06
Trim34	ENSRNOG00000042686	1.0929	0.0126645
Trib3	ENSRNOG00000007319	1.09896	1.50356e-08
Ifi35	ENSRNOG00000020678	1.101	8.79334e-05
Lgals3	ENSRNOG00000010645	1.10132	6.75176e-05
C1qtnf5	ENSRNOG00000007613	1.10403	1.56242e-06
C1rl	ENSRNOG00000011718	1.10619	1.15848e-06
Eva1c	ENSRNOG00000002072	1.10642	0.00417688
Coro1b	ENSRNOG00000021828	1.11187	5.70653e-14
Gcat	ENSRNOG00000055408	1.11247	0.0097212
Spsb2	ENSRNOG00000015125	1.11658	7.27751e-07
Arpc5	ENSRNOG00000028062	1.11678	1.0527e-17
Mettl23	ENSRNOG00000000249	1.12193	0.0207832
Chst14	ENSRNOG00000045997	1.12583	8.26125e-09
RGD1566138	ENSRNOG00000052199	1.12986	0.0405017
LOC100910581	ENSRNOG00000024505	1.14703	0.0112122
Casp1	ENSRNOG00000007372	1.14874	0.0405799
Arhgap22	ENSRNOG00000024728	1.16906	0.000676037
Aldh3b1	ENSRNOG00000017512	1.17022	0.0251614
AABR07011996.1	ENSRNOG00000061272	1.18184	0.00163854
Ngef	ENSRNOG00000016653	1.18681	0.00785907
C1s	ENSRNOG00000011971	1.18833	1.0527e-17
Gng11	ENSRNOG00000047914	1.18975	0.00217623
Usp18	ENSRNOG00000037198	1.1902	0.0385894
Stk19-ps	ENSRNOG00000000423	1.1917	0.0116266
Exoc3l4	ENSRNOG00000010111	1.19601	0.0153369
Renbp	ENSRNOG00000054765	1.20637	1.81326e-06
Tnfsf13	ENSRNOG00000014171	1.20969	0.0369707
LOC100910636	ENSRNOG00000024425	1.23302	0.000762351
Ddit3	ENSRNOG00000006789	1.2344	0.000616332
Pycard	ENSRNOG00000019675	1.24576	0.00105087
Itgb4	ENSRNOG00000005580	1.26397	0.0174554
Ogg1	ENSRNOG00000052140	1.2657	1.77606e-07
Bphl	ENSRNOG00000017577	1.26738	0.00911245
Rilp	ENSRNOG00000003784	1.26966	0.0137441
Sema3b	ENSRNOG00000016512	1.27087	3.28823e-06
7SK	ENSRNOG00000058555	1.28485	0.0453951
Pinlyp	ENSRNOG00000019862	1.29706	0.0137441
Fbxo6	ENSRNOG00000009217	1.30234	4.03729e-07
Prr22	ENSRNOG00000047295	1.30347	0.0359975
Gjc2	ENSRNOG00000038328	1.3118	0.0478665
Ifi27l2b	ENSRNOG00000026605	1.33269	0.000365344
Il18bp	ENSRNOG00000020150	1.382	0.00219342
Slc2a9	ENSRNOG00000005302	1.38339	0.00572576
Ifi47	ENSRNOG00000002470	1.38539	0.0273824
RT1-S3	ENSRNOG00000000777	1.38998	0.00594968
Lgals9	ENSRNOG00000012681	1.43883	0.000677672
Oas1b	ENSRNOG00000033220	1.47405	0.0157206
AABR07030901.1	ENSRNOG00000055889	1.49768	0.0325255
Mt2A	ENSRNOG00000043098	1.5113	1.39097e-05
Irf7	ENSRNOG00000017414	1.51724	0.000966632
Serpinb1a	ENSRNOG00000016581	1.52127	0.00948452
Mef2b	ENSRNOG00000020400	1.56305	0.00399712
Rasgrp3	ENSRNOG00000032703	1.56788	0.0034253
Serpinb8	ENSRNOG00000002396	1.60164	0.00117633
Fst	ENSRNOG00000011631	1.60682	0.00210067
Slc25a45	ENSRNOG00000030616	1.61135	0.010202
Inpp5d	ENSRNOG00000017020	1.62338	0.00226214
Dhx58	ENSRNOG00000018247	1.62931	0.000800566
MGC105649	ENSRNOG00000050251	1.72393	6.86849e-06
Cxcl10	ENSRNOG00000022256	1.72714	0.010202
Id1	ENSRNOG00000021750	1.74587	1.64283e-10
Mpa2l	ENSRNOG00000002134	1.75214	0.0201281
Gfpt2	ENSRNOG00000002810	1.76805	0.00877115
Mt1	ENSRNOG00000038047	1.86119	8.49929e-07
Gbp4	ENSRNOG00000028768	1.90029	0.00570139
Oas1a	ENSRNOG00000001369	1.90962	0.00681161
Isg15	ENSRNOG00000021802	1.91051	0.00217623
LOC100911548	ENSRNOG00000047113	1.93095	0.0074831
Scara5	ENSRNOG00000014398	1.96957	3.02824e-07
Tmem184a	ENSRNOG00000001275	1.97966	4.27919e-05
Apol3	ENSRNOG00000042771	1.9969	0.00336479
Il20rb	ENSRNOG00000023214	2.04957	0.0294245
Stap2	ENSRNOG00000047306	2.06311	0.00121245
Igsf9	ENSRNOG00000008054	2.07105	0.0325255
Mx2	ENSRNOG00000001963	2.07853	0.000457873
Pcsk2	ENSRNOG00000005438	2.09611	0.0280834
Anxa8	ENSRNOG00000060949	2.10146	6.62703e-07
Clec12a	ENSRNOG00000054860	2.10816	0.0355545
Mgst2	ENSRNOG00000061857	2.18473	0.00305228
Ifit3	ENSRNOG00000022839	2.26724	0.0104742
Uba7	ENSRNOG00000029195	2.27258	0.000179744
Hs3st1	ENSRNOG00000010598	2.33198	0.0277303
Dhrs9	ENSRNOG00000058568	2.40138	0.0167556
Il18rap	ENSRNOG00000054218	2.59849	0.0468376
Rtp4	ENSRNOG00000028895	2.60789	0.00504852
Kcnk2	ENSRNOG00000002653	2.80565	0.00908439
Slurp1	ENSRNOG00000005944	2.84817	0.000122178
Me3	ENSRNOG00000017311	3.17939	0.000879916
Sprr1a	ENSRNOG00000024028	3.51918	0.00518408
LOC100909857	ENSRNOG00000015677	3.84373	0.00873374
Aldh3a1	ENSRNOG00000002331	4.18549	1.52022e-08
Cpne1	ENSRNOG00000046990	6.92813	0.0327404

## Sheet: P OE vs P Ctr
Gene.name	Ensembl	log2.Fold.Change	padj.value
Rfxapl1	ENSRNOG00000028382	-22.6175	3.64298e-06
Brms1	ENSRNOG00000047683	-7.19311	0.00478197
Cracr2b	ENSRNOG00000019199	-6.2442	0.00367647
ACEA_U3	ENSRNOG00000057333	-5.86786	0.00192194
LOC108348161	ENSRNOG00000010555	-4.21469	0.0249276
Mettl21b	ENSRNOG00000047631	-3.2158	0.0105488
Lgr5	ENSRNOG00000004221	-2.78332	0.0123825
Zfp93	ENSRNOG00000042101	-2.60238	0.0377801
Lima1	ENSRNOG00000059801	-2.40346	3.9783e-34
Ttyh3	ENSRNOG00000055583	-2.3593	8.29643e-27
Ap1g2	ENSRNOG00000025619	-2.26984	1.59155e-19
Hdac9	ENSRNOG00000004158	-2.16083	0.00314535
Sgip1	ENSRNOG00000006357	-2.15165	0.0140099
Ntn3	ENSRNOG00000006970	-2.11882	6.60825e-10
Coro7	ENSRNOG00000004146	-2.05194	5.93817e-16
Aldh5a1	ENSRNOG00000023538	-2.0201	2.02206e-20
Pls1	ENSRNOG00000009945	-1.99193	8.56934e-05
Lpcat2	ENSRNOG00000016643	-1.99009	0.00138998
Thtpa	ENSRNOG00000018105	-1.96615	1.27377e-13
Gltpd2	ENSRNOG00000026488	-1.94762	0.0362144
Fam131b	ENSRNOG00000017149	-1.865	0.00188019
Tram1l1	ENSRNOG00000009835	-1.85979	0.0454543
Rgs2	ENSRNOG00000003687	-1.84562	0.0133449
Fbxl16	ENSRNOG00000022248	-1.82071	0.000418348
LOC100910875	ENSRNOG00000027368	-1.78731	1.1685e-22
Rnaseh2c	ENSRNOG00000020700	-1.73914	5.70242e-05
Vwa5b2	ENSRNOG00000001707	-1.73894	0.0165001
Ccdc155	ENSRNOG00000025378	-1.66493	0.0354634
Erlin2	ENSRNOG00000013763	-1.65788	1.71289e-14
LOC108348151	ENSRNOG00000046980	-1.62054	0.0193578
Rcbtb2	ENSRNOG00000015054	-1.61027	9.01087e-10
LOC103691744	ENSRNOG00000010658	-1.59739	0.0252941
AABR07063082.1	ENSRNOG00000031342	-1.5869	9.57466e-07
AABR07042514.3	ENSRNOG00000061056	-1.58484	0.000308111
Pkd2	ENSRNOG00000002146	-1.57515	5.27514e-05
Tmem121	ENSRNOG00000005174	-1.56071	4.09485e-08
Ptpn13	ENSRNOG00000002061	-1.555	6.33361e-11
Cstf2	ENSRNOG00000048025	-1.51783	1.44792e-08
G6pd	ENSRNOG00000056728	-1.48447	2.33498e-13
Scd2	ENSRNOG00000046005	-1.45946	4.49116e-08
Gamt	ENSRNOG00000024577	-1.44231	0.00199785
LOC100911337	ENSRNOG00000059069	-1.41187	0.0184631
P4ha2	ENSRNOG00000033663	-1.40849	2.20819e-10
Mcrip2	ENSRNOG00000020029	-1.37548	0.000510398
Mfsd2a	ENSRNOG00000014008	-1.35464	0.0354998
Rpl13a	ENSRNOG00000020618	-1.35076	0.0076312
Dhfr	ENSRNOG00000013521	-1.34667	6.9354e-10
Tmem205	ENSRNOG00000011747	-1.34612	0.0017169
Gle1	ENSRNOG00000015237	-1.34008	6.69802e-22
Ssc4d	ENSRNOG00000001435	-1.31011	0.0221484
Arhgef40	ENSRNOG00000052354	-1.30258	8.80719e-10
RGD1310127	ENSRNOG00000020144	-1.30232	4.89e-10
Rangrf	ENSRNOG00000004980	-1.30121	1.19506e-05
Tcf3	ENSRNOG00000051499	-1.28218	2.34318e-07
Vamp2	ENSRNOG00000006989	-1.27623	1.29143e-11
Dusp6	ENSRNOG00000023896	-1.27085	0.00014231
Garnl3	ENSRNOG00000057044	-1.27016	0.00834486
Timm8a1	ENSRNOG00000043480	-1.26628	0.0355327
Klhdc4	ENSRNOG00000018801	-1.26551	4.14321e-07
Cast	ENSRNOG00000010286	-1.26428	1.39648e-11
Noc4l	ENSRNOG00000037478	-1.26295	5.12912e-13
Fam43b	ENSRNOG00000043113	-1.25398	0.0151329
Zdhhc20	ENSRNOG00000011024	-1.24736	1.10972e-06
Limd2	ENSRNOG00000025448	-1.24503	0.00574935
Wfdc2	ENSRNOG00000014739	-1.24041	0.00025992
Pdlim5	ENSRNOG00000016419	-1.23806	0.002862
Epb42	ENSRNOG00000011649	-1.2348	0.0149892
Hacd1	ENSRNOG00000043192	-1.23476	6.58436e-05
Dennd2a	ENSRNOG00000026748	-1.23127	1.06241e-05
Maged1	ENSRNOG00000006756	-1.22292	3.01504e-13
Nudt8	ENSRNOG00000017955	-1.22143	0.00104785
Hnrnph3	ENSRNOG00000048193	-1.21603	7.7317e-08
Snrpa1	ENSRNOG00000011932	-1.21587	1.87755e-06
B3gnt9	ENSRNOG00000053895	-1.21111	0.00179358
Sympk	ENSRNOG00000014353	-1.20677	3.88271e-08
Hpdl	ENSRNOG00000018143	-1.20468	0.041282
Abhd1	ENSRNOG00000025689	-1.19926	0.000429389
Nop56	ENSRNOG00000007128	-1.18909	6.33146e-10
Prmt6	ENSRNOG00000048996	-1.1764	0.00328701
Zfp598	ENSRNOG00000012434	-1.17447	1.94295e-17
Amph	ENSRNOG00000012490	-1.16924	0.016169
Pigq	ENSRNOG00000020140	-1.16826	1.5676e-15
	ENSRNOG00000046460	-1.16655	6.04884e-06
Gsta4	ENSRNOG00000030449	-1.15807	0.0306853
Map4k1	ENSRNOG00000020505	-1.14629	0.0146756
Necap2	ENSRNOG00000008427	-1.14392	4.589e-17
Tbc1d4	ENSRNOG00000009431	-1.14386	0.0375003
Mprip	ENSRNOG00000003226	-1.13516	1.47813e-36
Gpr137	ENSRNOG00000021145	-1.13006	1.07083e-06
Ddx46	ENSRNOG00000021637	-1.12973	7.07423e-10
LOC103694877	ENSRNOG00000006589	-1.12788	9.32348e-07
Mif	ENSRNOG00000056076	-1.12788	9.32348e-07
Mical1	ENSRNOG00000000307	-1.12515	0.00108395
Fst	ENSRNOG00000011631	-1.12143	0.0285037
Igsf9b	ENSRNOG00000009253	-1.12059	0.0476365
Ankrd34a	ENSRNOG00000033741	-1.11966	0.00640832
Ptpra	ENSRNOG00000021223	-1.11731	0.000141772
Fosl1	ENSRNOG00000020552	-1.11101	0.00106175
Clic6	ENSRNOG00000026870	-1.1092	0.00231446
Mthfd1	ENSRNOG00000005602	-1.10813	7.80067e-11
LOC102552640	ENSRNOG00000021183	-1.10677	3.93603e-05
Gusb	ENSRNOG00000000913	-1.10236	2.70892e-09
Tcea2	ENSRNOG00000016288	-1.10207	0.000162216
Hmgb3	ENSRNOG00000011096	-1.10206	8.65167e-08
Polr3a	ENSRNOG00000010008	-1.10122	1.62128e-11
Trappc6a	ENSRNOG00000017468	-1.10011	0.0104646
Tmem198b	ENSRNOG00000006827	-1.09991	0.00322751
Prmt7	ENSRNOG00000000258	-1.09754	8.32603e-21
Blmh	ENSRNOG00000003563	-1.09667	9.55302e-11
Tsku	ENSRNOG00000027784	-1.09569	0.000101968
Ripk3	ENSRNOG00000020465	-1.09385	0.000183491
Eif3k	ENSRNOG00000020495	-1.09331	0.000211287
Aldh1l2	ENSRNOG00000008586	-1.09288	0.00278858
Plekhm2	ENSRNOG00000012163	-1.09237	3.10202e-08
Plxna3	ENSRNOG00000060464	-1.09174	0.000125397
Ncapd2	ENSRNOG00000055300	-1.09107	1.09834e-05
Ipo4	ENSRNOG00000019553	-1.09105	1.47657e-46
Egln2	ENSRNOG00000020947	-1.08916	4.54972e-05
Zfyve28	ENSRNOG00000014874	-1.08473	0.0236957
Srpk1	ENSRNOG00000000511	-1.08339	1.12043e-18
Slc39a7	ENSRNOG00000000465	-1.08159	7.71935e-06
Mib2	ENSRNOG00000017564	-1.07665	2.62765e-18
Irx5	ENSRNOG00000011180	-1.0736	0.00105303
Pigv	ENSRNOG00000000121	-1.0705	9.10383e-08
Smarca4	ENSRNOG00000009271	-1.0644	1.48593e-11
Dock9	ENSRNOG00000011969	-1.06098	4.54145e-05
Scly	ENSRNOG00000020083	-1.04867	1.71763e-06
Peg12	ENSRNOG00000024429	-1.03874	9.85518e-15
LOC100911851	ENSRNOG00000061155	-1.03718	0.0222008
Tmem70	ENSRNOG00000006608	-1.03563	7.93211e-13
Bcl7c	ENSRNOG00000018916	-1.03533	0.00116132
Drap1	ENSRNOG00000020527	-1.0332	0.00102179
Mthfd1l	ENSRNOG00000019582	-1.03067	9.85518e-15
Slc35a2	ENSRNOG00000024801	-1.02993	1.08138e-05
Morc4	ENSRNOG00000060846	-1.02618	1.74801e-05
U2af2	ENSRNOG00000015914	-1.02435	7.65008e-14
Fam122b	ENSRNOG00000002285	-1.02318	0.00258066
Rbm12	ENSRNOG00000050864	-1.02279	0.0167338
Slc7a6	ENSRNOG00000019943	-1.02206	5.77632e-16
Ccne1	ENSRNOG00000014786	-1.01875	0.00010554
Pi16	ENSRNOG00000000525	-1.01805	0.0104267
Ints11	ENSRNOG00000019712	-1.0143	5.75584e-09
Oplah	ENSRNOG00000011781	-1.01309	0.00527044
Tmem8a	ENSRNOG00000020374	-1.01232	0.00422749
Golim4	ENSRNOG00000024213	-1.01215	0.00085738
Hexim1	ENSRNOG00000003203	-1.01138	1.21398e-06
Eprs	ENSRNOG00000002393	-1.01005	3.10972e-10
Map3k6	ENSRNOG00000008936	-1.00964	1.91226e-07
Zfp326	ENSRNOG00000047761	-1.00878	5.17809e-06
Eno3	ENSRNOG00000004078	-1.008	7.17891e-05
Alyref	ENSRNOG00000036687	-1.00526	1.4925e-06
Dlx1	ENSRNOG00000001520	-1.0046	0.00282752
Hap1	ENSRNOG00000014819	-1.00408	0.00251371
Mef2d	ENSRNOG00000031778	-1.00351	0.000362011
Bcs1l	ENSRNOG00000016754	-1.00322	8.31051e-08
Sgsm2	ENSRNOG00000027194	-1.00149	1.8676e-05
Adar	ENSRNOG00000020744	1.00259	0.00642998
Plagl2	ENSRNOG00000010086	1.00467	0.00011379
Poli	ENSRNOG00000012111	1.00486	3.0607e-06
Mtrf1	ENSRNOG00000047106	1.00637	1.74943e-06
Slc36a1	ENSRNOG00000012356	1.00671	0.00534019
Fam83d	ENSRNOG00000015794	1.0072	9.02102e-15
Hyal3	ENSRNOG00000016093	1.00721	0.00255342
RGD1359634	ENSRNOG00000011170	1.00736	0.0180808
Nat14	ENSRNOG00000042414	1.00754	0.0391622
Nat2	ENSRNOG00000049498	1.00928	0.0119429
Smad9	ENSRNOG00000000091	1.011	0.00164604
Ctsc	ENSRNOG00000016496	1.01751	0.000569217
Tap1	ENSRNOG00000000457	1.01756	0.000409747
Tm2d1	ENSRNOG00000007527	1.02387	0.000121998
Cyb5d2	ENSRNOG00000024553	1.02534	0.01313
Cish	ENSRNOG00000029543	1.02697	0.00639863
Dnajc28	ENSRNOG00000002026	1.03083	0.00678021
Ypel3	ENSRNOG00000019721	1.03298	0.000822863
LOC100911766	ENSRNOG00000049324	1.03455	5.47399e-06
Faxdc2	ENSRNOG00000027259	1.03753	0.00646303
Gatb	ENSRNOG00000037655	1.03904	1.07034e-07
Kcnn1	ENSRNOG00000029264	1.03907	0.0451797
Mark4	ENSRNOG00000017069	1.04369	1.69922e-10
Zfat	ENSRNOG00000025140	1.04495	1.08138e-05
Plpp7	ENSRNOG00000010068	1.049	0.00454755
RGD1562218	ENSRNOG00000019169	1.05053	6.36601e-14
Dbp	ENSRNOG00000021027	1.05111	2.91319e-05
Stambp	ENSRNOG00000012227	1.05245	3.248e-06
Isoc2b	ENSRNOG00000016829	1.05264	0.000455933
Pla2g4a	ENSRNOG00000002657	1.05522	9.36516e-05
Fam222b	ENSRNOG00000029570	1.05661	8.97414e-09
Txnip	ENSRNOG00000021201	1.05725	3.59263e-06
Zbtb37	ENSRNOG00000026907	1.05748	0.0223456
Klf11	ENSRNOG00000054259	1.05759	1.61559e-05
Zfp560	ENSRNOG00000048394	1.05794	0.000714257
Cant1	ENSRNOG00000003239	1.05841	5.16308e-22
Lrsam1	ENSRNOG00000022312	1.05884	1.36455e-05
Gtpbp3	ENSRNOG00000023403	1.06035	1.58275e-06
Med6	ENSRNOG00000006976	1.06059	2.6098e-07
Ddr1	ENSRNOG00000057125	1.06236	4.90163e-11
C2	ENSRNOG00000051235	1.06296	0.0377801
Rnf185	ENSRNOG00000019325	1.06379	1.14259e-12
Rad51b	ENSRNOG00000059245	1.06413	0.000681073
Ifit2	ENSRNOG00000036604	1.06803	0.00431194
Rasl12	ENSRNOG00000032339	1.07061	0.045648
Agbl3	ENSRNOG00000010397	1.0736	0.0424502
LOC108348323	ENSRNOG00000054806	1.07435	0.0146891
Lyplal1	ENSRNOG00000023130	1.07494	1.52574e-08
Aldh3b1	ENSRNOG00000017512	1.07734	0.0232823
Tubb3	ENSRNOG00000017209	1.0774	0.0244941
Atat1	ENSRNOG00000000809	1.07752	2.38887e-11
Pla2r1	ENSRNOG00000008129	1.0777	0.0342903
RGD1307315	ENSRNOG00000013690	1.08137	0.000625971
Atp5s	ENSRNOG00000004893	1.08224	2.37433e-08
Akr1e2	ENSRNOG00000017165	1.08477	4.77785e-05
Xkr5	ENSRNOG00000028636	1.08497	3.82958e-11
Adal	ENSRNOG00000012166	1.08853	0.0041692
Mfap3l	ENSRNOG00000011775	1.09254	0.00310927
Pot1b	ENSRNOG00000047439	1.09282	0.024937
Rrm2b	ENSRNOG00000025454	1.09333	0.00527669
Sirt4	ENSRNOG00000001151	1.09871	0.00138103
Serpinb8	ENSRNOG00000002396	1.10105	0.000920342
Uvssa	ENSRNOG00000005122	1.10166	0.000231484
Adra1b	ENSRNOG00000060087	1.10271	0.00925815
Ctxn1	ENSRNOG00000001057	1.10371	0.002362
Carf	ENSRNOG00000017491	1.10422	0.0152049
Fbxw5	ENSRNOG00000028674	1.10473	1.00108e-12
Abca5	ENSRNOG00000004378	1.10656	0.0435252
Bst2	ENSRNOG00000059900	1.11206	0.000861241
Zbtb9	ENSRNOG00000026799	1.11375	1.12376e-05
Ugt1a5	ENSRNOG00000018740	1.11515	3.1928e-08
Zwint	ENSRNOG00000048682	1.11516	4.22772e-13
Ccdc17	ENSRNOG00000023216	1.11751	0.000853417
Mgme1	ENSRNOG00000028196	1.11806	4.26166e-07
RGD1566386	ENSRNOG00000028651	1.12119	0.00604784
Gpr146	ENSRNOG00000001288	1.12216	0.00393494
Xrcc4	ENSRNOG00000029966	1.1234	4.3105e-10
Tor1b	ENSRNOG00000006435	1.12421	4.81898e-12
Zfyve26	ENSRNOG00000059875	1.12543	0.00166264
Rhof	ENSRNOG00000042607	1.12623	0.0190721
Prkab1	ENSRNOG00000001142	1.12695	3.52521e-12
Narf	ENSRNOG00000036664	1.1303	3.57233e-06
Fyco1	ENSRNOG00000006336	1.13032	0.000454254
Letm2	ENSRNOG00000026180	1.13706	0.00229398
Mr1	ENSRNOG00000003522	1.13746	0.0214698
Relb	ENSRNOG00000033235	1.13802	2.12656e-05
Tmem218	ENSRNOG00000008757	1.14131	8.58911e-07
Zfyve1	ENSRNOG00000008614	1.14951	4.45145e-08
Cyp2s1	ENSRNOG00000020743	1.15142	0.0474434
Mfsd6	ENSRNOG00000012663	1.15369	0.00571903
Mettl15	ENSRNOG00000004926	1.15418	0.0037001
Zfp182	ENSRNOG00000047132	1.15432	5.89804e-05
Ttc38	ENSRNOG00000015916	1.15498	3.50653e-10
Dync2li1	ENSRNOG00000005151	1.1607	9.04581e-06
Prrg2	ENSRNOG00000020517	1.16199	0.0111167
Vrk3	ENSRNOG00000026517	1.16283	3.27929e-11
Ap3s2	ENSRNOG00000043141	1.16442	2.84015e-07
Prdm10	ENSRNOG00000007853	1.17007	0.00308542
Slc46a1	ENSRNOG00000010291	1.17385	2.20275e-05
LOC100911562	ENSRNOG00000046779	1.17466	0.041072
Dyx1c1	ENSRNOG00000056654	1.17948	0.034569
Stradb	ENSRNOG00000010728	1.1804	1.82816e-14
LOC108348266	ENSRNOG00000033680	1.18122	0.0260829
Kctd21	ENSRNOG00000024793	1.18149	1.17332e-09
Rnf122	ENSRNOG00000023473	1.18368	0.00129668
Gabarapl1	ENSRNOG00000053362	1.18659	0.00134417
Uba7	ENSRNOG00000029195	1.18907	0.0380268
Zfp579	ENSRNOG00000016608	1.19273	0.0119065
Mlh3	ENSRNOG00000006699	1.1935	0.000734894
Oard1	ENSRNOG00000012679	1.20066	0.00118384
Ypel5	ENSRNOG00000026742	1.20516	2.09211e-09
Rsg1	ENSRNOG00000023346	1.20521	4.14084e-06
Rimbp3	ENSRNOG00000030452	1.20808	0.0277008
Rhobtb1	ENSRNOG00000000633	1.21358	3.28342e-09
Ndor1	ENSRNOG00000010616	1.22405	5.96165e-09
Lxn	ENSRNOG00000013572	1.22763	6.96765e-09
Gbp2	ENSRNOG00000031743	1.23142	0.000277693
Chrac1	ENSRNOG00000009103	1.23483	3.53465e-06
Irgm	ENSRNOG00000031138	1.23756	0.000111413
Mrvi1	ENSRNOG00000017767	1.24247	0.00479596
Ly6e	ENSRNOG00000007091	1.24479	0.033959
Slc27a3	ENSRNOG00000015421	1.24519	0.0170035
Cpt1b	ENSRNOG00000010438	1.24531	0.0152581
Cfp	ENSRNOG00000025811	1.2502	0.00768475
Lrp2	ENSRNOG00000056184	1.25224	0.0344137
Cubn	ENSRNOG00000029047	1.2646	0.0429558
Ccpg1os	ENSRNOG00000052869	1.26721	0.00282752
Rc3h1	ENSRNOG00000002750	1.26773	0.00209682
Hbp1	ENSRNOG00000008927	1.27141	8.72955e-17
Tcp11l2	ENSRNOG00000007587	1.27228	1.33451e-09
LOC108348143	ENSRNOG00000058321	1.27916	0.00713072
Mettl17	ENSRNOG00000025512	1.27997	1.58662e-07
Tmem129	ENSRNOG00000017329	1.28209	1.29572e-14
Plekhm1	ENSRNOG00000028521	1.28729	8.91035e-09
RGD1309362	ENSRNOG00000038960	1.28808	0.0018142
Atxn7l1	ENSRNOG00000010415	1.29148	8.92236e-10
Irf9	ENSRNOG00000019478	1.30641	1.89857e-06
Samd9l	ENSRNOG00000051922	1.30715	0.00322157
Fmo4	ENSRNOG00000003400	1.30744	0.0038087
Col11a2	ENSRNOG00000000463	1.31028	0.000293989
Serpine1	ENSRNOG00000001414	1.31106	0.000640091
Uros	ENSRNOG00000017810	1.31278	2.38342e-06
Pts	ENSRNOG00000009250	1.31364	4.81176e-06
Dyrk1b	ENSRNOG00000019254	1.32037	0.000531816
LOC100910979	ENSRNOG00000019542	1.32492	0.00372993
Parp14	ENSRNOG00000023334	1.32588	0.000662497
Catsperd	ENSRNOG00000048818	1.33116	0.00779118
Neu1	ENSRNOG00000032942	1.33215	1.89856e-19
AABR07058464.1	ENSRNOG00000052981	1.33488	0.000110909
Mitd1	ENSRNOG00000018467	1.34101	4.88221e-05
Lace1	ENSRNOG00000043033	1.34221	0.000578846
Pnpo	ENSRNOG00000046493	1.34572	2.82247e-10
Dtx3l	ENSRNOG00000023400	1.34907	0.00047063
Ptger1	ENSRNOG00000004094	1.35308	0.00307249
Kctd13	ENSRNOG00000020010	1.35311	1.58851e-07
Trim21	ENSRNOG00000018517	1.35958	0.00289432
Nr6a1	ENSRNOG00000013232	1.36175	0.0324301
Trim69	ENSRNOG00000017157	1.36549	0.0140077
Abtb1	ENSRNOG00000015762	1.36577	1.95114e-06
Crebl2	ENSRNOG00000007115	1.36818	0.0021814
Cyp4f1	ENSRNOG00000004786	1.37235	0.0322723
Hist1h1c	ENSRNOG00000054978	1.37287	3.52192e-07
Tango2	ENSRNOG00000030245	1.38641	2.55403e-10
Apom	ENSRNOG00000000850	1.38839	0.0497846
Clec2d	ENSRNOG00000048726	1.40181	1.72879e-06
Grik5	ENSRNOG00000020310	1.40244	0.00239685
Zfp717	ENSRNOG00000014331	1.40672	1.18089e-10
Atg14	ENSRNOG00000011873	1.40942	2.08093e-09
Zscan2	ENSRNOG00000022164	1.41016	0.000218579
B3gntl1	ENSRNOG00000049724	1.41487	0.00289997
Mmaa	ENSRNOG00000011618	1.42234	0.000688112
Ifi44	ENSRNOG00000022218	1.42272	7.35677e-06
Prss36	ENSRNOG00000033343	1.42441	8.16066e-08
Sp100	ENSRNOG00000022769	1.42548	7.85152e-06
Etl4	ENSRNOG00000008666	1.42914	0.00359952
Fbxo15	ENSRNOG00000038225	1.4327	0.00629505
Rdh14	ENSRNOG00000039551	1.43301	9.55302e-11
RGD1562378	ENSRNOG00000058444	1.43302	0.0321439
Idnk	ENSRNOG00000019519	1.43371	0.000801721
Ager	ENSRNOG00000000439	1.4355	0.000284515
Popdc2	ENSRNOG00000058752	1.4422	0.0278953
Rhbdd1	ENSRNOG00000054963	1.44735	1.02975e-13
Acad10	ENSRNOG00000037815	1.44848	4.63917e-09
Slc35b3	ENSRNOG00000016174	1.45625	2.65071e-09
Mgea5	ENSRNOG00000017822	1.45859	3.0332e-11
LOC102553018	ENSRNOG00000057834	1.45861	0.00779118
Rps6ka1	ENSRNOG00000042411	1.46356	0.0347086
Igtp	ENSRNOG00000027008	1.47551	0.000156127
Bloc1s6	ENSRNOG00000037160	1.47806	1.50111e-33
Tmie	ENSRNOG00000027799	1.47828	0.000147714
AABR07060862.1	ENSRNOG00000053679	1.48392	0.00305259
Cyp4f17	ENSRNOG00000062306	1.48849	5.32548e-07
Wdr78	ENSRNOG00000006999	1.49439	0.00191782
Bloc1s5	ENSRNOG00000016497	1.49596	5.38026e-13
Synpo2	ENSRNOG00000014867	1.4961	0.0333853
Apol9a	ENSRNOG00000023410	1.50926	0.000200222
Ribc1	ENSRNOG00000003081	1.51005	6.87266e-06
Rsph3	ENSRNOG00000018762	1.51117	0.00171828
Ccdc28a	ENSRNOG00000053347	1.5163	1.48456e-06
Gbp5	ENSRNOG00000032240	1.52094	0.00585306
Arrdc4	ENSRNOG00000010775	1.52935	4.54145e-05
AABR07042611.1	ENSRNOG00000045837	1.53179	0.00562485
Cntf	ENSRNOG00000012460	1.53955	0.000899304
Ikzf2	ENSRNOG00000027430	1.55214	0.0270309
Mtmr14	ENSRNOG00000007881	1.56101	2.88335e-14
Iqcd	ENSRNOG00000001378	1.56122	0.00244694
Pdk4	ENSRNOG00000009565	1.56219	0.0356112
Hist1h2bo	ENSRNOG00000054296	1.56495	0.000213105
Hist2h3c2	ENSRNOG00000049198	1.56688	0.000873028
Msantd1	ENSRNOG00000010867	1.57244	0.0130747
Hpx	ENSRNOG00000018257	1.57541	0.00275209
Lrrc56	ENSRNOG00000016697	1.57821	0.000528669
Zfp473	ENSRNOG00000026572	1.58534	0.00187165
Lag3	ENSRNOG00000021334	1.58717	0.0412857
Colq	ENSRNOG00000019615	1.59673	0.0132803
Rbm15	ENSRNOG00000047499	1.60104	1.88711e-11
Ccl2	ENSRNOG00000007159	1.60922	0.0167222
Zfp605	ENSRNOG00000037428	1.60995	5.84973e-07
Hist2h3c2	ENSRNOG00000050478	1.61051	5.43266e-05
Neurl3	ENSRNOG00000015366	1.61562	1.02676e-05
Wnt4	ENSRNOG00000013166	1.61618	0.000440734
Efcab11	ENSRNOG00000053317	1.61999	3.58806e-08
Ifi47	ENSRNOG00000002470	1.62469	0.00188086
Has3	ENSRNOG00000059362	1.62727	0.0460531
Znfx1	ENSRNOG00000008194	1.65069	2.00533e-07
Amn1	ENSRNOG00000036917	1.65193	3.86079e-10
Avil	ENSRNOG00000050419	1.65896	0.000997997
Dedd2	ENSRNOG00000046112	1.66503	2.30288e-08
Mslnl	ENSRNOG00000039339	1.67014	0.0228489
Tmem86a	ENSRNOG00000013663	1.67864	0.00667791
Abcg4	ENSRNOG00000008862	1.6855	0.0317392
Ccdc173	ENSRNOG00000052954	1.68603	0.0464866
Hvcn1	ENSRNOG00000001270	1.68822	0.0359213
AC127756.1	ENSRNOG00000051474	1.69275	0.0473458
Slco2a1	ENSRNOG00000009005	1.69933	1.61559e-05
Fbxo48	ENSRNOG00000023026	1.70492	0.0399022
Parp9	ENSRNOG00000023463	1.70524	1.59068e-08
Tfcp2l1	ENSRNOG00000002414	1.707	0.00872858
Crebrf	ENSRNOG00000020769	1.70997	3.67171e-08
Zc3h6	ENSRNOG00000026277	1.71148	1.63584e-12
Trim68	ENSRNOG00000047229	1.71229	0.00585306
Phf7	ENSRNOG00000018996	1.71412	1.58851e-07
Tm4sf4	ENSRNOG00000016437	1.71689	0.0291783
Neu3	ENSRNOG00000018106	1.72448	0.00127306
Oas1g	ENSRNOG00000047076	1.7339	0.00157234
LOC684828	ENSRNOG00000048264	1.75551	0.000212268
Cemip	ENSRNOG00000012442	1.7589	0.000714898
Scnn1a	ENSRNOG00000019368	1.75912	0.00372537
Sdr42e1	ENSRNOG00000051819	1.75978	0.00576761
Pik3ip1	ENSRNOG00000018859	1.76312	0.000124287
Sprr1a	ENSRNOG00000024028	1.78159	0.0139324
Zc3h12d	ENSRNOG00000016041	1.79072	0.0355327
Lekr1	ENSRNOG00000031247	1.79671	0.0152049
LOC363337	ENSRNOG00000042971	1.79768	0.000573605
Tmem202	ENSRNOG00000026112	1.80117	0.0444138
Apoe	ENSRNOG00000018454	1.81023	0.000215731
MGC105567	ENSRNOG00000038955	1.81061	2.36752e-06
LOC100909998	ENSRNOG00000015188	1.81955	0.00138998
LOC102553866	ENSRNOG00000031003	1.82564	1.05413e-07
Gnat1	ENSRNOG00000017589	1.82625	0.0045668
Hsf2bp	ENSRNOG00000001193	1.83145	0.00792079
Prdm9	ENSRNOG00000021493	1.8319	0.0289728
Acrbp	ENSRNOG00000017399	1.83282	0.00467704
Lmcd1	ENSRNOG00000005690	1.84198	0.038884
Unc13d	ENSRNOG00000007439	1.85301	3.60133e-09
2004-09-01	ENSRNOG00000007367	1.8564	0.0201954
LOC102548013	ENSRNOG00000023089	1.85969	0.00720982
Slc4a3	ENSRNOG00000020138	1.86261	7.32061e-16
Cxcl10	ENSRNOG00000022256	1.87728	0.00120642
RGD1307461	ENSRNOG00000015718	1.89528	0.0211139
LOC100910750	ENSRNOG00000055850	1.90463	0.0377861
Nudt6	ENSRNOG00000017420	1.90794	4.17396e-08
Klhl24	ENSRNOG00000033372	1.91324	3.67085e-07
Ybey	ENSRNOG00000021365	1.92847	8.89521e-10
Klhl35	ENSRNOG00000017365	1.94166	0.0255903
AABR07034750.1	ENSRNOG00000060228	1.95709	0.0093251
Gabbr2	ENSRNOG00000008431	1.95713	0.0174497
Irf7	ENSRNOG00000017414	1.95874	8.96937e-07
Exph5	ENSRNOG00000025115	1.9758	0.0342533
Tmem79	ENSRNOG00000019414	1.97647	0.00110458
Wif1	ENSRNOG00000004476	1.98393	0.0100048
Mycn	ENSRNOG00000051372	1.99276	0.0122445
Kif27	ENSRNOG00000019257	1.99553	6.72699e-10
Oasl2	ENSRNOG00000028814	2.00331	8.51736e-05
Hist1h2bcl1	ENSRNOG00000021198	2.00707	1.13683e-10
Slc28a1	ENSRNOG00000018940	2.01164	0.00130817
Pcp4l1	ENSRNOG00000003209	2.01361	0.0477526
Spink8	ENSRNOG00000037199	2.02262	0.0156698
Ccdc171	ENSRNOG00000033445	2.03057	4.86143e-05
Ddx58	ENSRNOG00000006384	2.03207	2.27514e-06
Trim34	ENSRNOG00000042686	2.04499	1.46171e-08
Npff	ENSRNOG00000047739	2.04607	0.00183059
Fat3	ENSRNOG00000011585	2.05036	0.000227038
Zfp167	ENSRNOG00000004104	2.05591	5.91616e-06
MAST1	ENSRNOG00000003469	2.06367	4.18579e-08
Folr1	ENSRNOG00000019902	2.08152	0.0269745
Siglec10	ENSRNOG00000037339	2.0827	0.0010741
Cldn15	ENSRNOG00000001419	2.09362	5.49283e-06
Acacb	ENSRNOG00000000658	2.12626	0.0100464
Lrrc46	ENSRNOG00000009902	2.12676	0.000670025
Rfx8	ENSRNOG00000058243	2.13585	0.00579337
Gp1bb	ENSRNOG00000046981	2.13879	0.0413584
Kcnt1	ENSRNOG00000017283	2.14508	0.0333985
Hspa1l	ENSRNOG00000047966	2.14645	2.6327e-05
Casc1	ENSRNOG00000027630	2.16382	1.67364e-06
Zfr2	ENSRNOG00000020416	2.17493	1.01794e-19
Star	ENSRNOG00000015052	2.18536	0.0102695
Fam132a	ENSRNOG00000019864	2.21907	0.0138084
Lgals9	ENSRNOG00000012681	2.25943	6.48581e-11
Mettl23	ENSRNOG00000000249	2.27424	9.69578e-09
Clhc1	ENSRNOG00000004456	2.28415	0.00057492
Rn50_9_0975.2	ENSRNOG00000059440	2.28552	1.67606e-06
F2rl3	ENSRNOG00000048186	2.29969	0.0298688
Ifnlr1	ENSRNOG00000033984	2.30034	8.04659e-13
Grap	ENSRNOG00000002599	2.31293	0.0449103
Usp18	ENSRNOG00000037198	2.31889	2.1061e-08
Cdnf	ENSRNOG00000026493	2.34229	4.14084e-06
Spem1	ENSRNOG00000015419	2.34356	0.031891
Oas1b	ENSRNOG00000033220	2.39444	7.79505e-07
Dhx58	ENSRNOG00000018247	2.40249	6.02277e-10
Kdm4d	ENSRNOG00000024726	2.41505	0.0186836
Mybpc2	ENSRNOG00000019627	2.41513	0.00494994
Styxl1	ENSRNOG00000023366	2.41949	1.10841e-07
RGD1563091	ENSRNOG00000052444	2.42575	3.61929e-07
Myo1f	ENSRNOG00000008409	2.42649	3.05701e-07
Akr1c19	ENSRNOG00000038319	2.42797	0.000652967
Fbxo32	ENSRNOG00000006738	2.42963	5.85941e-07
Rn60_20_0032.5	ENSRNOG00000058784	2.43549	0.000677916
Plxdc2	ENSRNOG00000000142	2.44958	0.000213105
Vwa3b	ENSRNOG00000023566	2.46936	0.0192426
Mpzl2	ENSRNOG00000016085	2.47672	8.97907e-22
Gbp4	ENSRNOG00000028768	2.48587	1.68223e-05
Ctsk	ENSRNOG00000021155	2.48882	0.00196589
Lims2	ENSRNOG00000016021	2.4942	1.36254e-06
Shbg	ENSRNOG00000011357	2.50919	0.000292861
Phf11b	ENSRNOG00000053891	2.513	0.000158921
Hapln3	ENSRNOG00000022321	2.51553	0.000153064
Abca4	ENSRNOG00000012892	2.51976	0.0472111
Slc39a5	ENSRNOG00000033361	2.53305	8.34898e-07
Amh	ENSRNOG00000019377	2.53308	7.17387e-05
Lepr	ENSRNOG00000023664	2.54041	0.0223456
S100b	ENSRNOG00000001295	2.55363	0.00052068
Dhh	ENSRNOG00000053675	2.56233	0.0190721
Ccdc28b	ENSRNOG00000047578	2.56967	0.00159018
Sdcbp2	ENSRNOG00000009528	2.58945	0.00646303
Nup210l	ENSRNOG00000055790	2.59089	0.0141962
Cryba4	ENSRNOG00000049770	2.59984	0.00398163
P2rx3	ENSRNOG00000008552	2.60721	0.000158007
Dok3	ENSRNOG00000013564	2.62172	0.000600362
Aplnr	ENSRNOG00000009227	2.63525	0.0171434
LOC102550036	ENSRNOG00000062120	2.63784	0.0198926
Apol2	ENSRNOG00000048451	2.64267	0.0108024
LOC100911804	ENSRNOG00000048970	2.64267	0.0108024
Serpinf2	ENSRNOG00000003233	2.64515	0.00360102
Trpm6	ENSRNOG00000013053	2.65427	0.0318277
Slc25a34	ENSRNOG00000021526	2.65435	0.00970307
Rn60_17_0453.2	ENSRNOG00000060574	2.65926	0.0404328
Ccl27	ENSRNOG00000039530	2.66576	0.00961141
Oas1a	ENSRNOG00000001369	2.68614	2.73564e-07
Glyatl1	ENSRNOG00000036622	2.69443	0.0215463
Got1l1	ENSRNOG00000038473	2.70001	0.0424882
Fbxo47	ENSRNOG00000036882	2.70095	0.00235457
Csf1r	ENSRNOG00000018414	2.70453	0.000603697
LOC108348128	ENSRNOG00000020830	2.71851	7.48346e-05
Cd101	ENSRNOG00000037190	2.71983	0.0222638
Wfikkn1	ENSRNOG00000021578	2.72423	1.5117e-08
Nfe2l3	ENSRNOG00000010886	2.73767	0.000662174
LOC500227	ENSRNOG00000009917	2.74331	2.72939e-07
7SK	ENSRNOG00000058555	2.74563	8.07051e-08
Actl7b	ENSRNOG00000016621	2.74679	0.000200222
Bfsp1	ENSRNOG00000005707	2.75907	1.95543e-05
AC097183.1	ENSRNOG00000036856	2.76265	0.0113726
Gjc2	ENSRNOG00000038328	2.80494	8.23076e-07
Lrrc51	ENSRNOG00000020124	2.80642	2.83997e-08
P2ry4	ENSRNOG00000002953	2.81302	0.00192043
Diras1	ENSRNOG00000029738	2.82116	9.94896e-05
Nr5a1	ENSRNOG00000012682	2.82928	0.0391985
RT1-S3	ENSRNOG00000000777	2.86006	1.27428e-12
Syngr4	ENSRNOG00000021093	2.88406	0.00165271
Ccdc153	ENSRNOG00000039086	2.88526	0.0131141
Cage1	ENSRNOG00000024111	2.89056	1.95543e-05
Wdr64	ENSRNOG00000038083	2.91201	0.00886498
Ccdc30	ENSRNOG00000008560	2.92223	0.00102419
Hist1h2ah	ENSRNOG00000049649	2.93334	8.44112e-06
AABR07043510.1	ENSRNOG00000057214	2.94681	0.0123744
Vwa3a	ENSRNOG00000025110	2.97924	2.44268e-08
Il4i1	ENSRNOG00000020148	2.98738	1.39949e-11
Serpinc1	ENSRNOG00000002783	2.99014	0.0130315
Glra1	ENSRNOG00000013588	2.99067	0.00567016
Mx1	ENSRNOG00000001959	2.99991	3.1152e-05
Matk	ENSRNOG00000020431	3.02858	0.00984936
Stab2	ENSRNOG00000038948	3.0377	0.0151932
Col20a1	ENSRNOG00000010326	3.04486	1.93293e-08
Oscar	ENSRNOG00000055716	3.04862	3.28808e-05
Cntd1	ENSRNOG00000051150	3.0581	0.00145242
LOC102551929	ENSRNOG00000055506	3.05897	0.0145053
RGD1308775	ENSRNOG00000004112	3.05934	0.00416591
Rtp4	ENSRNOG00000028895	3.08495	7.92171e-06
Myom1	ENSRNOG00000057701	3.09137	1.12521e-05
Myo1a	ENSRNOG00000004177	3.09798	0.0153601
Prob1	ENSRNOG00000039596	3.09822	3.97198e-07
Oas2	ENSRNOG00000049282	3.101	0.0100065
Pla2g4f	ENSRNOG00000008135	3.13423	0.00030335
AABR07019088.1	ENSRNOG00000057291	3.16168	1.8409e-08
Gbp1	ENSRNOG00000023943	3.16375	0.00201976
AC117065.1	ENSRNOG00000052121	3.1639	0.0108414
Oasl	ENSRNOG00000001187	3.17171	5.14148e-07
Ctrc	ENSRNOG00000013745	3.18224	0.0168244
Ddx60	ENSRNOG00000059097	3.18822	0.000175164
Agbl2	ENSRNOG00000008467	3.18868	0.038907
Isg15	ENSRNOG00000021802	3.19385	5.20509e-10
RGD1311447	ENSRNOG00000016606	3.2059	0.00216316
Hsd17b13	ENSRNOG00000002212	3.22051	0.000153779
Lct	ENSRNOG00000003681	3.24477	0.000818815
Chrnb2	ENSRNOG00000020778	3.27514	1.64698e-10
Hsh2d	ENSRNOG00000023614	3.28099	0.00100622
Fbxl22	ENSRNOG00000017684	3.28561	3.97198e-07
Perm1	ENSRNOG00000020244	3.30354	0.000528062
Atp1b2	ENSRNOG00000011227	3.32603	0.00779118
RGD1560289	ENSRNOG00000022155	3.34202	0.000375008
Drd4	ENSRNOG00000017927	3.37416	0.00367586
AABR07065031.1	ENSRNOG00000047682	3.3778	4.92628e-05
Apoa1	ENSRNOG00000045679	3.38078	0.000153779
Rhbdl1	ENSRNOG00000019921	3.40343	0.0280676
AC094212.1	ENSRNOG00000055222	3.40686	3.42445e-07
Fmo5	ENSRNOG00000018076	3.41158	1.80158e-06
Rsad2	ENSRNOG00000007539	3.44801	0.00108983
AC139445.1	ENSRNOG00000059641	3.4981	0.0396795
Mpp4	ENSRNOG00000010486	3.52422	0.0320166
Micalcl	ENSRNOG00000016210	3.53954	2.17806e-15
Tg	ENSRNOG00000006104	3.53987	1.02094e-12
Spag6	ENSRNOG00000022021	3.54917	4.47615e-05
Cplx1	ENSRNOG00000000060	3.57207	0.0452742
Rn50_X_0713.4	ENSRNOG00000051298	3.57839	0.0321315
Tssk4	ENSRNOG00000019789	3.60612	0.00926019
AC134759.1	ENSRNOG00000057198	3.61789	0.0201954
Dynlrb2	ENSRNOG00000012450	3.62228	0.0351751
Tmem116	ENSRNOG00000027480	3.63639	2.61213e-07
Exd1	ENSRNOG00000025360	3.65213	0.00585306
Kprp	ENSRNOG00000028865	3.65664	7.37117e-11
Myo15a	ENSRNOG00000059219	3.67967	0.000217929
Susd1	ENSRNOG00000056819	3.69782	3.24977e-06
Nfatc2	ENSRNOG00000012175	3.70319	3.44434e-06
Cel	ENSRNOG00000010406	3.70987	0.000183491
AABR07072559.2	ENSRNOG00000056375	3.71669	0.00765939
Eef1a2	ENSRNOG00000012477	3.72004	0.0233321
Nkpd1	ENSRNOG00000043378	3.75107	6.78755e-07
Tssk6	ENSRNOG00000020599	3.7789	6.60825e-10
Spdef	ENSRNOG00000000491	3.80086	0.0424502
LOC100912483	ENSRNOG00000014865	3.80346	0.0280355
Tmem145	ENSRNOG00000020489	3.84974	0.0336657
Ncf1	ENSRNOG00000001480	3.88729	7.96862e-05
Impg2	ENSRNOG00000001622	3.90171	0.00346935
Mx2	ENSRNOG00000001963	3.92099	6.33395e-16
Tex22	ENSRNOG00000028158	3.95361	0.0050319
Col9a3	ENSRNOG00000009531	3.95618	0.00498564
Pnoc	ENSRNOG00000014231	3.98763	0.00646303
Ifit3	ENSRNOG00000022839	3.9948	8.92236e-10
Pdzd9	ENSRNOG00000016292	4.02389	0.00576761
RGD1310507	ENSRNOG00000009434	4.03398	1.02784e-10
Plekhd1	ENSRNOG00000038297	4.03847	8.51151e-11
Cfap70	ENSRNOG00000007046	4.11236	3.31319e-12
LOC103689977	ENSRNOG00000052613	4.20424	0.0284782
L1cam	ENSRNOG00000061230	4.29206	3.86851e-05
Trpv1	ENSRNOG00000019486	4.36561	1.05362e-09
Misp	ENSRNOG00000010423	4.37066	3.24977e-06
Stac3	ENSRNOG00000008050	4.3949	0.0025499
Pkd1l1	ENSRNOG00000004865	4.40304	6.85475e-06
LOC100362909	ENSRNOG00000028279	4.40923	0.00307249
Gzmc	ENSRNOG00000030018	4.41603	0.0353253
Rn50_X_0719.1	ENSRNOG00000051060	4.42924	0.0289237
Ccl5	ENSRNOG00000010906	4.46202	0.0209956
Ifi44l	ENSRNOG00000049994	4.46546	0.0203767
Dll3	ENSRNOG00000019338	4.49026	0.0180159
Tnfrsf18	ENSRNOG00000022012	4.5072	0.0228488
LOC365778	ENSRNOG00000061390	4.51453	1.09685e-05
Dcst1	ENSRNOG00000020621	4.533	2.66601e-06
Spi1	ENSRNOG00000012172	4.54673	0.037289
Cxcl11	ENSRNOG00000022298	4.57712	0.0488235
Lingo3	ENSRNOG00000032569	4.60866	0.0495399
Il22ra2	ENSRNOG00000012259	4.61306	0.00222587
AABR07058805.1	ENSRNOG00000055438	4.61352	0.0494491
RGD1564937	ENSRNOG00000030962	4.67116	0.0142681
Erich5	ENSRNOG00000005956	4.67488	0.00464796
Scube2	ENSRNOG00000013123	4.68669	1.03864e-05
Tgm7l1	ENSRNOG00000037203	4.69682	0.0334382
	ENSRNOG00000059093	4.73017	5.39381e-05
Ccdc78	ENSRNOG00000022331	4.79828	0.0196097
Slco1c1	ENSRNOG00000009740	4.81281	0.0109745
Adra2a	ENSRNOG00000047545	4.81733	1.41465e-06
Fscn2	ENSRNOG00000036700	4.8277	2.85063e-11
LOC103690128	ENSRNOG00000054319	4.85385	0.0309382
RT1-CE9-ps1	ENSRNOG00000061998	4.9086	0.0106966
Clcn1	ENSRNOG00000016917	4.91791	0.000149016
Lgi3	ENSRNOG00000011323	4.96692	2.04901e-06
Atp2b3	ENSRNOG00000061304	4.96958	3.69411e-05
Prss8	ENSRNOG00000019616	5.00383	0.000298906
7SK	ENSRNOG00000060289	5.03563	0.00169347
Kcnk7	ENSRNOG00000020784	5.05528	3.83072e-16
Mroh6	ENSRNOG00000032231	5.16063	0.0451797
Prox2	ENSRNOG00000005054	5.16568	3.0607e-06
Tmem130	ENSRNOG00000025235	5.16835	0.00823992
AABR07012711.1	ENSRNOG00000054483	5.1785	0.0286642
Ankrd2	ENSRNOG00000013840	5.21696	0.00138998
Akap3	ENSRNOG00000059227	5.23357	0.00943075
Plg	ENSRNOG00000017223	5.29998	0.000845352
RGD1563667	ENSRNOG00000037315	5.31233	1.02094e-12
Clca5	ENSRNOG00000013334	5.31411	0.0228876
Fut7	ENSRNOG00000014156	5.31771	0.0262619
AABR07054286.1	ENSRNOG00000055769	5.36913	0.0128195
Fbxo17	ENSRNOG00000019942	5.37042	0.0284649
C3	ENSRNOG00000046834	5.37453	0.0203309
Smyd1	ENSRNOG00000006776	5.39476	0.000755616
Espnl	ENSRNOG00000024717	5.40259	0.000195134
Otop1	ENSRNOG00000028423	5.45214	0.0183692
Rps15-ps2	ENSRNOG00000043026	5.46627	0.00506152
Ctnna3	ENSRNOG00000000378	5.5648	0.00756629
Snai3	ENSRNOG00000013586	5.58311	9.70026e-05
Ebi3	ENSRNOG00000050509	5.59217	0.0423389
AABR07027309.1	ENSRNOG00000060680	5.63454	0.000165253
Best2	ENSRNOG00000003737	5.68429	1.86983e-07
Tmod4	ENSRNOG00000021088	5.73913	1.72391e-08
Sag	ENSRNOG00000018185	5.78839	0.00179358
Stac2	ENSRNOG00000004805	5.80836	2.02608e-05
LOC690617	ENSRNOG00000039861	5.87386	0.00177594
Bhlha15	ENSRNOG00000025164	5.90081	0.00643473
RGD1559714	ENSRNOG00000061251	5.91623	0.00998115
Cdkl1	ENSRNOG00000038720	5.92993	0.00973433
Ak8	ENSRNOG00000012761	5.98696	0.00779118
Serinc4	ENSRNOG00000015499	6.0003	3.59263e-06
Mb	ENSRNOG00000004583	6.05223	0.00289184
Chadl	ENSRNOG00000024631	6.09167	0.00200087
Rbpms	ENSRNOG00000013328	6.19992	2.21182e-88
Arid3c	ENSRNOG00000013416	6.22752	0.0467091
Fam129c	ENSRNOG00000039357	6.28093	0.0179853
Itk	ENSRNOG00000006860	6.28962	0.00259599
Hsd17b3	ENSRNOG00000019096	6.34526	0.0065327
Gpr84	ENSRNOG00000036834	6.34867	0.00141564
LOC102553715	ENSRNOG00000002382	6.37441	0.0322382
Ccdc169	ENSRNOG00000038095	6.38091	0.00591186
LOC689173	ENSRNOG00000059493	6.38932	0.0488235
Fitm1	ENSRNOG00000019019	6.4791	0.00137212
Rn60_X_0768.2	ENSRNOG00000031310	6.49166	0.0101683
Adam30	ENSRNOG00000019044	6.51073	0.0105801
Stpg2	ENSRNOG00000023457	6.53675	0.0174395
Mkrn2os	ENSRNOG00000052003	6.55261	0.0417617
Igfals	ENSRNOG00000015061	6.60596	4.52752e-05
Slc27a5	ENSRNOG00000019626	6.64114	0.00561877
Them5	ENSRNOG00000043445	6.65735	0.00691498
Sim1	ENSRNOG00000037600	6.66332	0.000354452
Slc4a1	ENSRNOG00000020951	6.83657	0.0138811
Nrsn2	ENSRNOG00000023935	6.90717	1.87612e-09
Stab1	ENSRNOG00000018434	6.93051	0.00206489
LOC108348167	ENSRNOG00000014685	6.96078	0.00152109
Lman1l	ENSRNOG00000019355	7.07694	0.00463619
Iqca1l	ENSRNOG00000011092	7.12832	0.00134032
Rec8	ENSRNOG00000019503	7.32172	0.00138461
U3	ENSRNOG00000055743	7.48845	0.000459233
Cpne1	ENSRNOG00000046990	7.52797	0.00761944
Tekt5	ENSRNOG00000002571	7.67791	1.05012e-06
Tnfsf8	ENSRNOG00000048321	7.71886	7.3664e-11
Nyx	ENSRNOG00000009646	7.77876	9.64745e-05
Slc5a5	ENSRNOG00000018822	7.92822	1.12043e-18
Cacna1d	ENSRNOG00000013147	8.00878	3.94331e-05
Ccdc87	ENSRNOG00000025247	8.06504	4.88372e-07
Chrne	ENSRNOG00000003777	8.10932	3.37343e-06
Cyp2d2	ENSRNOG00000008988	8.4674	4.81619e-08
Hells	ENSRNOG00000047104	8.70323	0.0167222
LOC100911692	ENSRNOG00000050158	9.32361	3.35384e-10
