# Supplementary material for: Identification of RBPMS as a mammalian smooth muscle master splicing regulator via proximity of its gene with super-enhancers
Source: eLife. 2019 Jul 8;8:e46327. doi: 10.7554/eLife.46327 (PMC6613909; doi:10.7554/eLife.46327)
Supplement: Supplementary file 3. [file elife-46327-supp3.xlsx]

## Sheet: Summary
Genes with significant changes in mRNA splicing (FDR < 0.05, Delta Psi > 10%)
ASE ID, FDR, Psi sample 1, Psi sample 2 and Delta Psi detected by using rMATS as described in Methods
Samples
T	Rat aorta tissue
P9	Rat aorta Passage 9
D Ctr	Control Differentiated PAC1
D KD	RBPMS KD in Differentiated PAC1
P Ctr	Control Proliferative PAC1 (minus Dox)
P OE	RBPMSA overexpression Proliferative PAC1 (plus Dox)
Comparisons
(T - P9)	Rat aorta dedifferentiation
(D Ctr - P Ctr)	PAC1 dedifferentiation
(D KD - D Ctr)	RBPMS knockdown in PAC1 cells
(P OE - P Ctr)	RBPMS overexpression in PAC1 cells

## Sheet: T - P9
Aorta.Tissue.ASE.ID	FDR	Psi.T	Psi.P9	Delta Psi
SE.Smtn.14.83758453.83758618.83755141.83755445.83758962.83759114	0	0.187,0.189,0.207	1.0,0.978,0.894	-0.763
SE.Nbeal1.9.66996579.66996762.66995540.66995647.67003904.67003991	5.8209e-12	0.109,0.049,0.114	0.601,0.93,0.596	-0.618
A5SS.Acta2.1.252549823.252550065.252550033.252550065.252547459.252547611	0	0.263,0.246,0.191	0.802,0.824,0.906	-0.611
A3SS.Rsrp1.5.153263914.153264030.153263943.153264030.153262432.153262569	8.90871e-12	0.033,0.028,0.129	0.559,0.502,0.953	-0.608
SE.Macf1.5.141075460.141075592.141074382.141074614.141076124.141076328	0	0.105,0.139,0.103	0.771,0.64,0.72	-0.595
SE.Anxa1.1.237896104.237896347.237895187.237895310.237897292.237897380	0	0.428,0.39,0.382	0.985,1.0,1.0	-0.595
MXE.Capn2.13.100904855.100904954.100907566.100907787.100904641.100904760.100923392.100923462	4.83539e-07	0.152,0.093,0.382	0.832,0.929,0.65	-0.595
A3SS.Nexn.2.257467235.257467442.257467235.257467343.257472128.257472277	0	0.076,0.12,0.087	0.644,0.765,0.647	-0.591
SE.Smtn.14.83756781.83756984.83755141.83755445.83758962.83759114	0.000621939	0.073,0.08,0.146	1.0,0.775,0.267	-0.581
SE.Phldb2.11.57457676.57457820.57454353.57454443.57462008.57462108	4.0514e-09	0.06,0.246,0.193	0.891,0.812,0.509	-0.571
A5SS.Acta2.1.252549965.252550213.252550033.252550213.252547459.252547611	0	0.146,0.168,0.05	0.624,0.631,0.799	-0.563
SE.Cox20.13.96222934.96223062.96219852.96220140.96223462.96224023	6.90981e-05	0.087,0.292,0.699	0.937,0.792,1.0	-0.55
RI.Rsrp1.5.153262432.153264030.153262432.153262569.153263943.153264030	0	0.272,0.331,0.44	0.866,0.826,0.986	-0.545
SE.Myef2.3.117363827.117363878.117363479.117363548.117365290.117365392	0	0.248,0.356,0.239	0.884,0.796,0.79	-0.542
MXE.Actn1.6.103379204.103379379.103379819.103379900.103378007.103378166.103380858.103381005	0	0.182,0.246,0.21	0.835,0.786,0.603	-0.529
A5SS.Gsn.3.14482473.14482655.14482473.14482535.14483940.14484145	0	0.047,0.043,0.055	0.71,0.418,0.599	-0.527
SE.Phldb2.11.57457745.57457820.57454353.57454443.57462008.57462108	0	0.397,0.339,0.269	0.921,0.843,0.797	-0.519
SE.Ano1.1.217814519.217814585.217813969.217814025.217816390.217816442	5.82696e-08	0.029,0.014,0.087	0.583,0.767,0.329	-0.516
SE.Rnf114.3.164252538.164252735.164248730.164248897.164256310.164256417	0	0.251,0.353,0.232	0.845,0.742,0.795	-0.515
SE.Sp140.9.92657390.92657432.92655120.92655168.92662115.92662225	2.4546e-08	0.401,0.198,0.319	0.812,0.661,0.962	-0.506
MXE.Actn1.6.103379313.103379376.103379819.103379900.103378007.103378166.103380858.103381005	0	0.14,0.191,0.147	0.779,0.728,0.472	-0.5
SE.Fnbp1.3.9885985.9886168.9873375.9873485.9887067.9887262	8.15817e-08	0.265,0.309,0.302	0.896,0.833,0.628	-0.494
MXE.Pls3.X.119091790.119092020.119093219.119093258.119090867.119091031.119106374.119106504	1.8868e-12	0.486,0.417,0.595	0.952,1.0,1.0	-0.485
SE.Rsrp1.5.153262977.153263022.153262432.153262569.153263943.153264030	1.94003e-06	0.018,0.014,0.037	0.289,0.273,0.951	-0.481
SE.Pitpnb.12.51281952.51282034.51280149.51280990.51284347.51284470	0	0.228,0.286,0.242	0.749,0.79,0.658	-0.48
SE.Rnf114.3.164252560.164252689.164248730.164248897.164256310.164256417	2.63281e-13	0.343,0.483,0.287	0.892,0.822,0.829	-0.477
SE.Tsc2.10.13971971.13972100.13970544.13970709.13973125.13973220	0.000802856	0.503,0.434,0.126	0.689,1.0,0.805	-0.477
A3SS.Flna.X.156469214.156469448.156469281.156469448.156468947.156469025	7.30971e-13	0.454,0.608,0.423	0.968,0.915,1.0	-0.466
SE.Pitpnb.12.51281972.51282034.51280149.51280990.51284347.51284470	0	0.195,0.252,0.211	0.704,0.759,0.59	-0.465
SE.Pitpnb.12.51281950.51282022.51280149.51280990.51284347.51284470	0	0.221,0.205,0.201	0.723,0.72,0.576	-0.464
SE.Mroh1.7.117512893.117513082.117512610.117512757.117513362.117513518	8.08612e-05	0.585,0.452,0.164	0.966,0.897,0.725	-0.462
SE.Zcchc2.13.25997058.25997142.25994578.25994673.25998637.25998695	3.79549e-09	0.52,0.54,0.416	1.0,0.856,1.0	-0.46
A3SS.Pdlim5.2.247892368.247892787.247892368.247892460.247894038.247894081	0	0.256,0.251,0.27	0.81,0.725,0.622	-0.46
SE.Bag6.20.5133231.5133339.5133040.5133118.5133460.5133573	7.93768e-10	0.217,0.356,0.26	0.849,0.735,0.603	-0.451
A5SS.Sdhaf2.1.226572107.226572349.226572263.226572349.226547530.226548970	0.00264688	0.511,0.28,0.425	0.835,0.731,1.0	-0.45
MXE.Spag9.10.81725290.81725359.81733775.81733962.81714612.81714733.81736164.81736235	0.000126055	0.433,0.072,0.422	0.773,0.831,0.665	-0.447
SE.Csnk1d.10.110154582.110154640.110151419.110153536.110157630.110157770	1.13066e-12	0.207,0.237,0.237	0.581,0.801,0.636	-0.446
SE.Fnbp1.3.9885985.9886081.9873375.9873485.9887067.9887262	0.000642557	0.258,0.231,0.264	0.842,0.797,0.448	-0.445
SE.Pitpnb.12.51281950.51282034.51280149.51280990.51284347.51284470	0	0.389,0.429,0.382	0.864,0.877,0.785	-0.442
SE.Fam188a.17.79780606.79780684.79779511.79779713.79783658.79783829	9.63306e-12	0.453,0.44,0.558	0.906,0.925,0.942	-0.441
SE.Pdlim7.17.9658728.9658847.9658263.9658294.9659208.9659225	0	0.364,0.312,0.366	0.834,0.763,0.756	-0.437
SE.Hacd1.17.81182345.81182467.81177594.81177773.81187237.81187326	0	0.109,0.099,0.103	0.596,0.508,0.508	-0.434
SE.Fgfr1op2.4.180901627.180901771.180898923.180899083.180904265.180904379	0	0.353,0.344,0.372	0.775,0.71,0.887	-0.434
SE.Tcf25.19.56210165.56210297.56209746.56209819.56212626.56213310	5.30471e-08	0.336,0.342,0.305	0.788,0.861,0.637	-0.434
SE.Slc25a33.5.166706965.166707101.166703220.166703501.166708399.166708500	0.000151992	0.416,0.558,0.558	0.827,1.0,1.0	-0.432
SE.Rnf114.3.164252538.164252689.164248730.164248897.164256310.164256417	0	0.445,0.555,0.393	0.928,0.864,0.889	-0.429
SE.Col6a3.9.97972527.97973127.97970548.97971121.97975280.97975865	7.81614e-14	0.066,0.089,0.058	0.376,0.685,0.438	-0.429
SE.RGD1565536.3.110552339.110552503.110552056.110552096.110552595.110552718	4.56136e-10	0.215,0.045,0.086	0.555,0.608,0.471	-0.429
SE.Nup85.10.104133843.104134011.104131202.104131309.104134155.104134221	2.85588e-08	0.441,0.87,0.426	1.0,1.0,1.0	-0.421
SE.Agtpbp1.17.5543049.5543296.5537446.5537540.5546406.5546615	1.60048e-07	0.141,0.12,0.117	0.589,0.462,0.589	-0.421
SE.Lsm14b.3.175415535.175415613.175415126.175415294.175415784.175415946	2.08763e-05	0.169,0.285,0.496	0.896,0.701,0.617	-0.421
A3SS.Pigq.10.15289535.15290897.15289535.15289622.15291707.15291769	1.43758e-11	0.455,0.522,0.324	0.882,0.824,0.852	-0.419
SE.Taf1d.8.13868731.13868776.13867524.13867585.13868963.13868995	1.33508e-06	0.34,0.432,0.196	0.733,0.706,0.784	-0.418
SE.Pdlim5.2.247856268.247856413.247853846.247854095.247858118.247858312	6.64193e-06	0.297,0.472,0.432	0.909,0.764,0.779	-0.417
SE.Agtpbp1.17.5543012.5543087.5537446.5537540.5546406.5546615	0.0027267	0.281,0.153,0.212	0.73,0.394,0.773	-0.417
SE.Zfp868.16.21522064.21522125.21518872.21518911.21523241.21524286	5.4531e-09	0.539,0.579,0.641	1.0,1.0,1.0	-0.414
MXE.Ccdc62.12.38083909.38084011.38086365.38086532.38082372.38082544.38089366.38089559	0.00440887	0.476,0.193,0.259	0.827,0.592,0.751	-0.414
SE.Csnk1d.10.110154582.110154645.110151419.110153536.110157630.110157770	0	0.39,0.371,0.462	0.776,0.901,0.784	-0.413
SE.Zdhhc4.12.13290416.13290595.13289017.13289091.13292738.13292864	1.19173e-07	0.588,0.61,0.368	0.985,0.95,0.87	-0.413
SE.Rnf114.3.164252560.164252735.164248730.164248897.164256310.164256417	8.71737e-10	0.058,0.185,0.066	0.52,0.528,0.484	-0.408
A5SS.Pqlc3.6.42294056.42294147.42294079.42294147.42293838.42293880	0.00419442	0.245,0.343,0.403	0.635,0.812,0.764	-0.407
SE.Nf2.14.85011258.85011318.84996904.84999209.85012807.85012973	0.000141744	0.49,0.318,0.796	0.909,0.903,1.0	-0.403
MXE.RGD735065.20.6870321.6870459.6877400.6877495.6869841.6869896.6877772.6877864	0.000307181	0.69,0.38,0.406	0.942,0.933,0.804	-0.401
A5SS.Atp2a2.12.39599320.39599450.39599320.39599441.39602529.39603326	0	0.13,0.132,0.096	0.515,0.564,0.478	-0.4
SE.Abcg3l3.14.6074512.6074570.6073453.6073513.6075115.6075268	0.000795415	0.441,0.296,1.0	0.934,1.0,1.0	-0.399
SE.Ccdc66.16.3136714.3136957.3129669.3130123.3137382.3137447	1.48306e-05	0.743,0.41,0.653	1.0,1.0,1.0	-0.398
SE.Nmt2.17.78940115.78940165.78937408.78937553.78941710.78941753	4.03414e-14	0.254,0.219,0.274	0.58,0.675,0.67	-0.393
SE.Tango6.19.38893462.38893639.38892004.38892117.38896005.38896135	0.000881889	0.672,0.386,0.483	0.892,1.0,0.823	-0.391
SE.Tsc2.10.13971971.13972100.13970544.13970706.13973125.13973220	0.0128525	0.376,0.415,0.098	0.671,0.542,0.85	-0.391
MXE.Pdlim7.17.9658728.9658847.9659208.9659225.9658263.9658294.9659478.9659615	0	0.474,0.448,0.47	0.884,0.843,0.837	-0.391
SE.Pde4b.5.122130628.122130715.122128687.122128852.122132471.122132626	3.13793e-10	0.663,0.55,0.566	1.0,0.948,1.0	-0.39
MXE.Actn1.6.103379313.103379379.103379819.103379900.103378007.103378166.103380858.103381005	0	0.062,0.083,0.069	0.596,0.507,0.28	-0.39
SE.Zmynd8.3.162483729.162483813.162480803.162482290.162488920.162488987	2.4872e-06	0.641,0.419,0.661	0.937,0.952,1.0	-0.389
SE.Bcor.X.11672674.11672728.11669103.11671944.11673208.11673395	0.000395623	0.851,0.244,0.534	0.838,0.954,1.0	-0.388
A5SS.Cdk10.19.56024902.56025107.56024902.56024959.56026651.56026724	0.00572635	0.142,0.314,0.286	0.566,0.762,0.566	-0.384
SE.Col6a3.9.97981211.97981814.97975280.97975865.97989209.97989297	0	0.048,0.104,0.029	0.411,0.548,0.371	-0.383
RI.Dnaja2.19.22571122.22571347.22571122.22571178.22571287.22571347	9.19447e-05	0.501,0.461,0.656	1.0,0.87,0.89	-0.381
SE.Abcg3l3.14.6074512.6074577.6073453.6073513.6075115.6075268	0.000827043	0.514,0.287,1.0	0.933,1.0,1.0	-0.377
MXE.Mff.9.90898146.90898305.90901832.90901865.90891864.90891953.90903419.90903479	8.20594e-06	0.392,0.16,0.244	0.613,0.606,0.708	-0.377
A3SS.Tpm1.8.72823429.72823551.72823429.72823499.72823683.72823817	4.33269e-07	0.818,0.656,0.402	1.0,1.0,1.0	-0.375
A5SS.Cdk10.19.56024902.56025137.56024902.56024959.56026651.56026724	0.00645856	0.174,0.36,0.317	0.603,0.781,0.588	-0.374
SE.Wnk1.4.152481966.152482251.152481172.152481273.152483052.152483184	0.000195009	0.531,0.805,0.407	1.0,0.861,1.0	-0.373
SE.Ercc8.2.39444766.39444868.39439308.39439404.39446591.39446715	0.00224135	0.315,0.11,0.396	0.587,0.554,0.798	-0.373
SE.Fgfr1op2.4.180901627.180901741.180898940.180899083.180904265.180904379	0	0.459,0.418,0.474	0.813,0.739,0.911	-0.371
SE.Nrip1.11.14700872.14700991.14658224.14665763.14721240.14721315	0.018946	0.599,0.312,0.637	0.82,0.841,1.0	-0.371
SE.Hacd1.17.81182345.81182467.81177594.81177773.81187267.81187421	1.46239e-10	0.468,0.525,0.354	0.86,0.815,0.778	-0.369
SE.Arhgef7.16.83023988.83024184.83022244.83022338.83026792.83026932	9.0067e-05	0.148,0.157,0.214	0.655,0.502,0.468	-0.369
SE.Znf740.7.143813940.143814035.143810891.143811209.143814342.143814468	0.000104997	0.925,0.29,0.594	1.0,0.915,1.0	-0.369
SE.Ubqln1.17.6874302.6874386.6871572.6871715.6875443.6875559	0	0.282,0.276,0.282	0.684,0.615,0.636	-0.365
SE.Taf1d.8.13868647.13868776.13867524.13867585.13868963.13868999	6.40289e-07	0.48,0.471,0.309	0.8,0.733,0.823	-0.365
A5SS.Zfp612.19.41566794.41567013.41566980.41567013.41565964.41566091	0.00772903	0.493,0.448,0.272	0.656,0.945,0.703	-0.364
SE.Stk16.9.82413135.82413231.82412888.82413009.82413592.82413714	3.54669e-08	0.46,0.346,0.435	0.743,0.868,0.72	-0.363
SE.Agtpbp1.17.5543049.5543087.5537446.5537540.5546406.5546615	1.03497e-12	0.57,0.482,0.558	0.926,0.848,0.923	-0.362
SE.Tmpo.7.31853270.31853429.31852636.31852747.31858706.31858804	8.99646e-11	0.462,0.6,0.567	0.907,0.928,0.874	-0.36
A3SS.Cald1.4.62260046.62260175.62260091.62260175.62257937.62258337	7.80161e-05	0.048,0.091,0.078	0.696,0.381,0.22	-0.36
SE.Stk16.9.82413115.82413231.82412888.82413009.82413592.82413714	5.66945e-06	0.244,0.246,0.269	0.564,0.737,0.535	-0.359
SE.Cspp1.5.8812797.8813006.8810509.8810643.8815167.8815225	0.0116923	0.5,0.226,0.374	0.946,0.701,0.529	-0.359
SE.Fn1.9.78918303.78918573.78916998.78917186.78919401.78919515	0	0.06,0.093,0.068	0.315,0.489,0.492	-0.358
SE.Arhgef7.16.83023988.83024213.83022244.83022338.83026792.83026932	0.000284894	0.286,0.253,0.297	0.747,0.584,0.579	-0.358
SE.Pnkp.1.100854673.100854720.100853901.100854121.100854946.100855243	1.73562e-06	0.602,0.459,0.682	0.861,0.954,1.0	-0.357
SE.Bclaf1.1.15805268.15805406.15799719.15799971.15809311.15809425	2.55845e-09	0.572,0.637,0.632	1.0,1.0,0.906	-0.355
SE.Ist1.19.41986011.41986041.41984664.41984877.41987362.41987411	0.00723187	0.425,0.182,0.583	0.767,0.67,0.817	-0.355
SE.Mia2.6.80281927.80282044.80277963.80278122.80283181.80283240	9.46503e-07	0.576,0.328,0.514	0.828,0.856,0.797	-0.354
SE.Csf1.2.210534772.210534853.210529420.210530481.210534998.210535169	0.000388018	0.586,0.669,0.377	0.915,0.885,0.892	-0.353
SE.Snx5.3.138385404.138385625.138382890.138382996.138386747.138386869	7.31319e-09	0.65,0.84,0.455	1.0,1.0,1.0	-0.352
SE.Stat1.9.54327424.54327491.54324390.54324521.54327857.54327958	0.0198798	0.374,0.374,0.23	0.557,0.669,0.807	-0.352
SE.Rbpms.16.62086654.62086788.62056602.62056753.62089339.62089579	0	0.65,0.545,0.682	1.0,0.991,0.938	-0.351
SE.Pdlim5.2.247892739.247892787.247892368.247892460.247894038.247894081	0	0.105,0.118,0.115	0.59,0.466,0.331	-0.35
SE.Ppig.3.55961130.55961178.55960326.55960624.55968675.55968743	1.90273e-05	0.059,0.015,0.183	0.608,0.38,0.32	-0.35
SE.Tmem175.14.2088692.2088734.2088421.2088457.2090936.2091034	0.00116259	0.558,0.438,0.395	0.831,0.788,0.82	-0.349
SE.Tpm1.8.72822036.72822115.72820275.72820553.72823429.72823551	1.55168e-06	0.43,0.417,0.47	0.914,0.679,0.769	-0.348
SE.Dph3.16.8206782.8206853.8202047.8205014.8207264.8207464	0	0.387,0.393,0.34	0.794,0.679,0.689	-0.347
A3SS.Recql.4.176604170.176604282.176604170.176604218.176606265.176606382	0.0166186	0.288,0.321,0.233	0.591,0.743,0.548	-0.347
A3SS.Cep170b.6.137305210.137305448.137305315.137305448.137302258.137303929	0.00508116	0.378,0.327,0.437	0.625,0.779,0.773	-0.345
SE.Tnc.5.79811666.79811939.79806438.79806561.79836080.79836344	0.0188428	0.558,1.0,0.245	0.988,0.93,0.916	-0.344
A5SS.Dtna.18.14544405.14545121.14544405.14544473.14552922.14553003	0.000831183	0.637,0.509,0.626	1.0,0.794,1.0	-0.341
SE.Srpx.X.14177981.14178041.14173333.14173525.14220501.14220662	1.96181e-06	0.483,0.409,0.583	0.81,0.855,0.83	-0.34
SE.Fam188a.17.79783658.79783781.79777137.79777211.79785517.79785578	0.00201056	0.471,0.48,0.534	0.737,0.767,1.0	-0.34
SE.Actn1.6.103379204.103379376.103378007.103378166.103380858.103381005	0.000275603	0.531,0.61,0.489	0.943,0.7,1.0	-0.338
SE.Zfp638.4.115653165.115653249.115650480.115650531.115653860.115653929	5.61603e-07	0.418,0.558,0.586	0.878,0.786,0.907	-0.336
SE.Plpp5.16.71123076.71123124.71121174.71121994.71123844.71123969	1.76018e-05	0.355,0.291,0.336	0.736,0.699,0.555	-0.336
SE.Git2.12.47616461.47616566.47614474.47614617.47621241.47621490	3.83964e-05	0.412,0.421,0.36	0.703,0.849,0.648	-0.336
RI.Scn1b.1.89550738.89551508.89550738.89551350.89551436.89551508	8.38259e-10	0.072,0.037,0.054	0.521,0.439,0.211	-0.336
SE.Srpx2.X.104734635.104734662.104734081.104734447.104736094.104736308	1.03699e-05	0.545,0.322,0.44	0.706,0.797,0.806	-0.334
SE.Neo1.8.63660911.63661006.63657155.63657419.63664705.63664798	2.35687e-07	0.597,0.605,0.64	0.953,0.887,1.0	-0.333
SE.Zfp644.14.4154609.4154670.4125379.4125681.4178530.4180743	0.000547992	0.475,0.361,0.322	0.644,0.686,0.827	-0.333
SE.Ttc26.4.66127966.66128030.66126426.66126480.66131921.66132005	0.043897	0.477,0.288,0.534	0.622,0.875,0.798	-0.332
SE.Neo1.8.63660911.63661009.63657155.63657419.63664705.63664798	1.67269e-07	0.599,0.607,0.641	0.955,0.885,1.0	-0.331
SE.Nt5dc1.20.41191709.41191791.41128718.41128893.41193200.41193280	0.00955756	0.556,0.406,0.291	0.713,0.693,0.839	-0.331
A5SS.Tpm1.8.72823623.72823817.72823683.72823817.72823429.72823499	8.82554e-08	0.7,0.801,0.506	1.0,1.0,1.0	-0.331
SE.Dlg5.15.173267.173375.171285.171448.174041.174225	0.00394624	0.381,0.425,0.425	0.889,0.66,0.666	-0.328
SE.Eif4a2.11.81374536.81374643.81373047.81373826.81375112.81375192	0	0.097,0.128,0.149	0.429,0.518,0.406	-0.326
SE.Hectd2.1.255234881.255234981.255232410.255232534.255237718.255237826	1.06241e-08	0.719,0.666,0.638	1.0,1.0,1.0	-0.326
SE.Sync.5.147495536.147495655.147482282.147483432.147498271.147498902	1.0576e-06	0.535,0.728,0.631	1.0,0.872,1.0	-0.326
SE.Pprc1.1.265815951.265816044.265815692.265815839.265816148.265819005	3.37377e-06	0.775,0.607,0.563	1.0,0.922,1.0	-0.326
SE.Iffo1.4.157663090.157663175.157659146.157659941.157663567.157663628	1.27471e-08	0.069,0.162,0.116	0.371,0.423,0.529	-0.325
SE.Uap1.13.88469794.88469845.88464907.88464974.88471357.88471546	0.000612624	0.414,0.248,0.398	0.7,0.725,0.611	-0.325
SE.Ciao1.3.119674757.119674874.119671920.119672353.119676031.119676120	8.99384e-05	0.592,0.658,0.565	0.953,1.0,0.834	-0.324
SE.Eif4a2.11.81374532.81374643.81373047.81373826.81375112.81375192	0	0.115,0.135,0.172	0.445,0.536,0.411	-0.323
MXE.Epb41.5.150086377.150086458.150087606.150087708.150084610.150084709.150095016.150095145	1.52693e-08	0.301,0.173,0.224	0.562,0.606,0.5	-0.323
SE.Axl.1.82566746.82566773.82563906.82564039.82568169.82568380	9.1752e-11	0.402,0.44,0.351	0.684,0.768,0.704	-0.321
MXE.Tpm2.5.59016948.59017057.59018337.59018515.59016621.59016775.59020267.59020337	0.025165	0.305,0.254,0.119	0.385,0.738,0.518	-0.321
SE.Map3k2.18.25007438.25007556.25006105.25006223.25008390.25008458	3.09294e-07	0.868,0.582,0.591	1.0,1.0,1.0	-0.32
MXE.Supt4h1.10.75034130.75034366.75035866.75035946.75032940.75033047.75037125.75037181	1.44441e-07	0.027,0.056,0.151	0.407,0.483,0.304	-0.32
SE.Mtmr2.8.12291841.12291912.12284527.12284747.12307727.12307833	3.31322e-07	0.381,0.27,0.352	0.671,0.623,0.667	-0.319
SE.Ubac1.3.3460500.3460558.3453400.3453921.3461484.3461571	0.000188627	0.461,0.771,0.672	0.935,0.925,1.0	-0.319
A3SS.Eif4g3.5.156540741.156540859.156540798.156540859.156537921.156538015	0.0035007	0.204,0.355,0.458	0.592,0.722,0.656	-0.318
SE.Fam149b1.15.4395111.4395316.4392149.4392292.4396662.4396767	3.49636e-06	0.382,0.386,0.392	0.765,0.654,0.691	-0.317
SE.Eml4.6.6628355.6628547.6628133.6628159.6637304.6637428	0.000735729	0.618,0.279,0.747	0.891,1.0,0.704	-0.317
SE.Aldh16a1.1.101146045.101146148.101144726.101144853.101151173.101151320	3.9394e-05	0.746,0.399,0.662	0.852,0.969,0.935	-0.316
SE.Golga3.12.52545493.52546140.52544051.52544163.52547527.52547640	5.86534e-10	0.735,0.623,0.651	1.0,1.0,0.952	-0.314
SE.Phldb2.11.57457676.57457820.57454353.57454443.57460540.57460681	2.39374e-06	0.209,0.27,0.251	0.679,0.556,0.437	-0.314
SE.Ank2.2.231547651.231547750.231409391.231409493.231648101.231648122	1.72604e-08	0.221,0.243,0.287	0.605,0.519,0.565	-0.313
SE.Epb41.5.150120807.150120870.150115895.150116072.150125471.150125656	0.00743275	0.691,0.402,0.559	0.917,0.957,0.718	-0.313
SE.Nsfl1c.3.146990178.146990399.146988560.146988635.146990924.146991090	5.58187e-12	0.054,0.097,0.042	0.481,0.32,0.329	-0.312
SE.Cd99.20.56195716.56195957.56194975.56195053.56196134.56196170	6.03168e-08	0.215,0.214,0.253	0.541,0.5,0.576	-0.312
SE.Csnk2a2.19.9987066.9987117.9973287.9973399.9994984.9995044	0.000690291	0.569,0.507,0.748	1.0,0.816,0.943	-0.312
SE.Dmpk.1.79997941.79998170.79997731.79997778.79998490.79999364	4.49773e-06	0.706,0.458,0.622	0.954,0.977,0.788	-0.311
SE.Sbno2.7.12487359.12487532.12471823.12471916.12501641.12501803	0.00234243	0.879,0.364,0.826	1.0,1.0,1.0	-0.31
MXE.Fggy.5.114527212.114527293.114529693.114529882.114516888.114516964.114546295.114546510	0.0270811	0.32,0.0,0.156	0.41,0.507,0.49	-0.31
A5SS.Pdlim5.2.247883902.247883968.247883950.247883968.247883552.247883725	1.69533e-05	0.538,0.618,0.771	1.0,0.924,0.934	-0.31
SE.Pdxk.20.10942278.10942333.10930517.10930737.10944190.10944295	6.66967e-07	0.794,0.458,0.799	0.975,1.0,1.0	-0.308
SE.Dut.3.117524778.117524811.117524427.117524647.117525086.117525446	1.37788e-06	0.609,0.542,0.477	0.713,0.91,0.928	-0.308
SE.Arhgap1.3.80556651.80556725.80555195.80555305.80559029.80559187	3.27516e-07	0.476,0.421,0.477	0.872,0.709,0.715	-0.307
SE.N4bp1.19.21258469.21258561.21256613.21256744.21261257.21261365	1.37358e-06	0.812,0.749,0.484	1.0,0.966,1.0	-0.307
SE.Mff.9.90898146.90898305.90891864.90891953.90901832.90901865	7.1961e-06	0.633,0.488,0.595	0.972,0.867,0.799	-0.307
SE.Pnpo.10.84878144.84878378.84877149.84877203.84879578.84879703	3.65793e-05	0.572,0.881,0.625	1.0,1.0,1.0	-0.307
SE.Ppid.2.178359695.178359802.178358809.178358916.178361333.178361522	0.000396713	0.167,0.092,0.029	0.59,0.335,0.281	-0.306
SE.Cpeb2.14.72375090.72375180.72369096.72369187.72375912.72376194	0.000555757	0.12,0.116,0.17	0.344,0.524,0.456	-0.306
SE.Nsfl1c.3.146990160.146990399.146988560.146988635.146990924.146991090	9.10937e-11	0.052,0.092,0.081	0.472,0.308,0.36	-0.305
SE.Cdh11.19.2534166.2534268.2531157.2531261.2546131.2546383	4.11132e-06	0.621,0.619,0.721	1.0,1.0,0.877	-0.305
SE.Sec31a.14.10882042.10882120.10879801.10879876.10884508.10884587	2.11502e-05	0.471,0.475,0.594	0.782,0.846,0.826	-0.305
A5SS.Syde2.2.251892967.251893118.251892967.251893012.251893540.251894037	7.56604e-05	0.083,0.139,0.019	0.515,0.367,0.273	-0.305
SE.Dmpk.1.79997964.79998170.79997731.79997778.79998490.79999364	5.33913e-06	0.723,0.459,0.641	0.956,0.98,0.798	-0.304
SE.Kdm6a.X.4850508.4850643.4849246.4849342.4851179.4851399	8.51215e-06	0.758,0.935,0.394	1.0,1.0,1.0	-0.304
MXE.Ift88.15.37773687.37773754.37783923.37784034.37762889.37762996.37784285.37784923	0.0275453	0.229,0.174,0.137	0.315,0.577,0.559	-0.304
A5SS.Srsf7.6.2884502.2884701.2884524.2884701.2884237.2884344	0.0170383	0.227,0.185,0.179	0.635,0.593,0.274	-0.304
SE.Epc2.3.33722300.33722492.33720243.33720376.33725541.33725631	0.0225437	0.401,0.463,0.457	0.923,0.809,0.492	-0.301
SE.Dph3.16.8206782.8206857.8202047.8205014.8207264.8207464	0	0.56,0.566,0.523	0.89,0.835,0.825	-0.3
A5SS.Akip1.1.174330910.174331135.174330910.174331101.174334262.174334376	0.000192688	0.739,0.47,0.609	0.873,0.91,0.934	-0.3
SE.Ep400.12.52009223.52009393.51998721.51998899.52009789.52009964	6.879e-07	0.79,0.688,0.626	1.0,1.0,1.0	-0.299
SE.Sec31a.14.10881560.10881599.10879801.10879876.10884508.10884587	5.80495e-06	0.468,0.575,0.681	0.83,0.904,0.888	-0.299
SE.Slc7a6.19.38170536.38170662.38162514.38163073.38173653.38173777	0.000664197	0.906,0.488,0.708	1.0,1.0,1.0	-0.299
SE.Pfkfb3.17.70704220.70704307.70703527.70703592.70705160.70705334	9.2119e-07	0.171,0.101,0.087	0.453,0.378,0.423	-0.298
SE.Phc1.4.155109406.155109562.155101581.155102071.155110203.155110353	0.0456298	0.262,0.596,0.538	0.853,0.777,0.66	-0.298
MXE.Slc25a26.4.126593955.126594000.126604128.126604198.126555276.126555324.126610164.126610229	0.0444582	0.075,0.1,0.053	0.093,0.451,0.578	-0.298
SE.Rhbdd3.14.85354112.85354302.85353537.85353574.85356161.85356248	0.000543545	0.837,0.391,0.837	1.0,0.956,1.0	-0.297
SE.Kdm5a.4.152965989.152966071.152960240.152960651.152966533.152972201	6.36851e-05	0.257,0.198,0.309	0.526,0.63,0.495	-0.296
SE.Ctps1.5.139486234.139486431.139483915.139484010.139488919.139489052	0.0123954	0.786,0.236,1.0	0.909,1.0,1.0	-0.296
SE.Sppl2a.3.119384320.119384374.119383718.119383821.119384552.119384609	0	0.116,0.071,0.121	0.376,0.405,0.413	-0.295
MXE.Pls3.X.119052026.119052143.119065134.119065313.119030418.119030494.119078761.119078842	8.71377e-05	0.0,0.114,0.03	0.563,0.149,0.317	-0.295
SE.Git2.12.47616461.47616611.47614474.47614617.47621241.47621490	9.2286e-05	0.481,0.614,0.416	0.798,0.884,0.712	-0.294
SE.Abcg3l3.14.6074433.6074627.6073453.6073513.6075115.6075268	0.000444703	0.67,0.395,1.0	0.948,1.0,1.0	-0.294
SE.U2surp.8.103288717.103288827.103284120.103284219.103290555.103290600	0.00050206	0.541,0.49,0.479	0.651,0.768,0.966	-0.292
A5SS.Gng8.1.78819038.78819275.78819038.78819104.78821681.78821767	0.0424036	0.488,0.862,0.595	0.819,1.0,1.0	-0.291
SE.Plpp5.16.71123076.71123205.71121174.71121994.71123844.71123969	7.77816e-06	0.525,0.411,0.494	0.826,0.79,0.682	-0.289
SE.Tcf25.19.56212291.56212517.56209746.56209819.56212626.56213310	0.0100654	0.308,0.385,0.323	0.629,0.762,0.492	-0.289
A3SS.Nbeal1.9.66996579.66996762.66996674.66996762.66995540.66995647	0.000633308	0.843,0.467,0.701	1.0,0.955,0.921	-0.288
SE.Abcf1.20.3314291.3314338.3309898.3310052.3315181.3315268	4.03414e-14	0.838,0.622,0.664	1.0,0.985,1.0	-0.287
SE.Phldb2.11.57457745.57457820.57454353.57454443.57460540.57460681	3.21918e-07	0.401,0.357,0.318	0.733,0.621,0.582	-0.287
SE.Vldlr.1.245266027.245266111.245264994.245265141.245266443.245266524	0	0.034,0.023,0.038	0.343,0.323,0.283	-0.285
SE.Arfip1.2.183535786.183535861.183534320.183534433.183542106.183542215	9.45631e-10	0.455,0.379,0.391	0.729,0.728,0.623	-0.285
SE.Dlg5.15.173267.173411.171285.171448.174041.174225	0.00191348	0.518,0.481,0.603	0.919,0.772,0.765	-0.285
SE.Atm.8.58119429.58119531.58117030.58117132.58119811.58120045	7.86756e-09	0.114,0.071,0.095	0.375,0.376,0.381	-0.284
SE.Lrrc40.2.264869191.264869265.264868075.264868261.264871215.264871345	3.04874e-08	0.647,0.649,0.556	0.878,0.915,0.912	-0.284
SE.Crem.17.57079357.57079393.57074569.57074609.57082569.57082726	0.000391674	0.259,0.143,0.262	0.562,0.531,0.423	-0.284
SE.Ttc3.11.34638529.34638656.34631079.34631134.34643702.34643763	0.000747891	0.542,0.523,0.771	0.923,0.92,0.844	-0.284
SE.Sorbs1.1.259463206.259463239.259459398.259459540.259469135.259469248	0.0244049	0.344,0.294,0.385	0.799,0.6,0.477	-0.284
MXE.Sorbs1.1.259462867.259463026.259463206.259463239.259459398.259459540.259469135.259469248	0.00348427	0.523,0.685,0.459	0.806,0.796,0.917	-0.284
SE.Arhgap23.10.85394600.85394756.85392067.85393226.85394941.85395053	0.0188511	0.421,0.5,0.785	0.795,0.881,0.879	-0.283
SE.Afdn.1.53765345.53765366.53764452.53764621.53767044.53767250	1.76749e-08	0.83,0.64,0.683	1.0,1.0,1.0	-0.282
SE.Ncoa7.1.29384209.29384283.29383717.29383813.29384590.29384708	0.00023566	0.851,0.433,0.808	1.0,1.0,0.937	-0.282
A5SS.Ttf1.3.7648674.7648909.7648674.7648902.7652657.7652747	0.000217087	0.662,0.543,0.616	0.958,0.859,0.849	-0.282
SE.Fam179b.6.86743336.86743486.86739052.86739150.86744781.86744877	0.0100654	0.261,0.558,0.348	0.609,0.722,0.68	-0.281
SE.Tubgcp6.7.130090692.130090784.130090082.130090222.130091085.130091195	3.3355e-06	0.597,1.0,0.564	1.0,1.0,1.0	-0.28
SE.Gpcpd1.3.125194978.125195054.125193312.125193354.125200846.125200925	8.04785e-05	0.616,0.61,0.62	0.962,0.843,0.88	-0.28
SE.Hectd2.1.255234884.255234981.255232410.255232534.255237718.255237826	5.44183e-07	0.804,0.675,0.683	1.0,1.0,1.0	-0.279
SE.Tpm2.5.59020694.59020770.59020457.59020520.59021291.59021362	0.000172593	0.562,0.642,0.434	0.959,0.931,0.586	-0.279
SE.Uap1.13.88469794.88469842.88464907.88464974.88471357.88471546	0.000439598	0.376,0.402,0.342	0.685,0.712,0.558	-0.278
SE.Phldb1.8.49009515.49009560.49008610.49008905.49010003.49010106	1.53502e-10	0.221,0.165,0.271	0.456,0.549,0.483	-0.277
SE.Esco1.18.1821034.1821146.1816019.1816134.1826609.1828606	7.36652e-07	0.809,0.561,0.8	1.0,1.0,1.0	-0.277
SE.Emsy.1.163556653.163556818.163551222.163551374.163564634.163564833	0.00206713	0.887,0.568,0.714	1.0,1.0,1.0	-0.277
SE.Fam149b1.15.4395186.4395316.4392149.4392292.4396662.4396767	1.11912e-07	0.534,0.563,0.549	0.863,0.804,0.805	-0.275
SE.Tars2.2.197870130.197870231.197868955.197869118.197870684.197870783	2.66001e-05	0.81,0.653,0.641	0.928,1.0,1.0	-0.275
SE.Mybphl.2.211172616.211172799.211171777.211171821.211172948.211173786	0.0178645	0.225,0.195,0.275	0.539,0.609,0.373	-0.275
A3SS.Acta2.1.252550033.252550148.252550033.252550065.252550360.252550394	2.84568e-06	0.895,0.788,0.447	0.955,1.0,1.0	-0.275
SE.Atm.8.58119429.58119537.58117030.58117132.58119811.58120045	1.05133e-06	0.2,0.121,0.193	0.433,0.439,0.464	-0.274
SE.Ilf3.8.22424998.22425169.22424310.22424540.22427889.22428037	5.02332e-05	0.729,0.61,0.55	0.895,0.895,0.92	-0.274
SE.Pds5b.12.787271.787382.786736.787173.789608.789747	0.000241063	0.581,0.617,0.561	0.895,0.862,0.825	-0.274
SE.Slmap.16.2115373.2115463.2113977.2114075.2117270.2117405	0	0.6,0.598,0.638	0.891,0.902,0.863	-0.273
SE.Rbm5.8.116522354.116522428.116519576.116519660.116522912.116522982	4.3816e-13	0.793,0.557,0.751	1.0,0.959,0.962	-0.273
SE.Cfap100.4.122329495.122329590.122327967.122328068.122337291.122337389	0.000444703	0.591,0.754,0.718	0.948,0.933,1.0	-0.273
SE.Actn1.6.103379819.103379900.103379313.103379379.103380858.103381005	0	0.033,0.034,0.041	0.442,0.32,0.162	-0.272
SE.RGD1307830.13.67600849.67601029.67600086.67600182.67601622.67601659	5.56219e-10	0.702,0.82,0.618	1.0,1.0,0.954	-0.271
SE.Pds5b.12.787274.787386.786736.787173.789608.789747	1.82764e-05	0.556,0.638,0.713	0.93,0.913,0.876	-0.271
A5SS.Flcn.10.46171995.46172166.46172031.46172166.46168894.46169016	0.0213927	0.178,0.075,0.196	0.483,0.423,0.355	-0.271
SE.Mtmr3.14.84705931.84706020.84701558.84703633.84707810.84709215	0.000321432	0.681,0.52,0.709	0.939,0.869,0.913	-0.27
RI.Haus7.X.157362978.157363752.157362978.157363202.157363542.157363752	0.000137615	0.73,0.75,0.67	1.0,0.961,1.0	-0.27
SE.Irf1.10.39112144.39112244.39110709.39110801.39112946.39113173	2.59466e-09	0.804,0.629,0.665	0.936,0.968,1.0	-0.269
SE.Adam17.6.43404312.43404554.43402648.43402699.43405179.43405258	1.71113e-08	0.726,0.804,0.625	1.0,0.961,1.0	-0.269
SE.Ifrd1.6.60140724.60140833.60135911.60136046.60141351.60141530	0	0.851,0.685,0.596	0.973,0.995,0.966	-0.267
SE.Fam188a.17.79783658.79783827.79777137.79777211.79785517.79785578	2.73222e-05	0.63,0.635,0.674	0.865,0.871,1.0	-0.266
SE.Rapgef2.2.177856506.177856530.177855277.177855501.177857089.177857213	0.000372494	0.216,0.36,0.251	0.593,0.569,0.463	-0.266
SE.Rab8b.8.72645193.72645255.72642614.72642665.72646740.72646830	0.00105495	0.635,0.666,0.763	0.964,0.899,1.0	-0.266
SE.Fam45a.1.282194099.282194175.282190943.282191006.282197073.282197222	3.55529e-07	0.629,0.734,0.65	0.959,0.875,0.97	-0.264
SE.Hibch.9.53453069.53453189.53446592.53446907.53459781.53459863	0.00848848	0.388,0.684,0.686	0.852,0.953,0.744	-0.264
A5SS.Tardbp.5.165434020.165434165.165434038.165434165.165432940.165433200	0.00739476	0.552,0.748,0.629	0.94,0.824,0.958	-0.264
SE.Rsrc2.12.38277869.38277962.38274348.38274450.38278335.38278492	5.68398e-10	0.095,0.095,0.096	0.342,0.248,0.485	-0.263
SE.Lypla1.5.14565684.14565820.14564596.14564773.14568232.14568306	0	0.718,0.675,0.649	0.961,0.941,0.927	-0.262
SE.Mtmr3.14.84706454.84706565.84701558.84703633.84707810.84709215	0.000572143	0.668,0.532,0.699	0.938,0.85,0.895	-0.261
SE.Agap1.9.96905169.96905328.96884307.96884476.96927254.96927416	0.00237731	0.623,0.759,0.479	0.833,0.861,0.95	-0.261
SE.Atp9b.18.77466081.77466114.77450251.77450332.77477059.77477111	0.0453763	0.789,0.378,0.6	0.855,0.875,0.818	-0.26
SE.Fam188a.17.79780606.79780658.79779511.79779713.79783658.79783781	0	0.68,0.711,0.766	0.976,0.976,0.981	-0.259
SE.Ep400.12.52007447.52007584.51998721.51998899.52009789.52009964	3.0068e-06	0.828,0.732,0.662	1.0,1.0,1.0	-0.259
SE.Pbrm1.16.7131313.7131409.7130601.7130687.7132326.7132418	1.77508e-07	0.149,0.183,0.316	0.466,0.516,0.436	-0.257
SE.Srpk2.4.8162145.8162268.8148912.8149019.8163383.8163409	1.28132e-06	0.667,0.886,0.675	1.0,1.0,1.0	-0.257
SE.Mterf1.4.27366889.27367017.27365375.27365461.27371085.27372372	0.0112675	0.636,1.0,0.597	1.0,1.0,1.0	-0.256
SE.Fgfr1op.1.53142883.53142943.53136481.53136708.53145849.53145930	0.0190598	0.047,0.041,0.374	0.417,0.279,0.533	-0.256
SE.Rnf138.18.15150795.15150903.15148982.15149051.15153627.15153739	0.00126453	0.309,0.311,0.381	0.65,0.444,0.673	-0.255
SE.Wisp2.3.160208395.160208502.160207912.160208200.160215416.160215671	0.0368116	0.815,0.359,0.706	0.888,0.893,0.861	-0.254
SE.Wisp2.3.160208378.160208502.160207912.160208200.160215416.160215671	0.0390627	0.8,0.352,0.709	0.883,0.887,0.853	-0.254
SE.Plpp5.16.71123076.71123247.71121174.71121994.71123844.71123969	1.03699e-05	0.641,0.493,0.568	0.871,0.845,0.746	-0.253
SE.Wisp2.3.160208389.160208502.160207912.160208200.160215416.160215671	0.042678	0.808,0.353,0.715	0.887,0.89,0.857	-0.253
SE.Golt1b.4.176613047.176613219.176611363.176611455.176615320.176615402	1.66666e-05	0.934,0.523,0.788	1.0,1.0,1.0	-0.252
MXE.Supt4h1.10.75034130.75034366.75035870.75035946.75032940.75033047.75037125.75037181	1.0429e-07	0.026,0.028,0.095	0.343,0.379,0.183	-0.252
SE.Pde4b.5.122130615.122130715.122128687.122128852.122132471.122132626	3.1828e-11	0.781,0.738,0.709	1.0,0.978,1.0	-0.25
SE.Atm.8.58119429.58119513.58117030.58117132.58119811.58120045	2.04867e-06	0.124,0.078,0.104	0.321,0.345,0.391	-0.25
MXE.Cd99.20.56194975.56195053.56195716.56195957.56193035.56193080.56196134.56196170	0.00517941	0.224,0.241,0.309	0.454,0.495,0.575	-0.25
SE.Cacna1c.4.150760673.150760748.150757863.150757954.150781207.150781380	0.000171313	0.278,0.26,0.352	0.549,0.557,0.532	-0.249
MXE.Smtn.14.83756781.83756984.83758453.83758618.83755141.83755445.83758962.83759114	0	0.744,0.729,0.604	0.935,0.929,0.959	-0.249
SE.Wsb1.10.66592523.66592624.66590031.66590204.66593700.66593832	0	0.853,0.671,0.731	1.0,1.0,1.0	-0.248
SE.St6gal1.11.80978667.80978746.80977208.80977854.80981289.80981422	0.00192589	0.166,0.0,0.035	0.382,0.357,0.207	-0.248
MXE.Acp1.6.49844092.49844206.49844243.49844357.49838471.49838533.49844442.49844516	0	0.488,0.502,0.451	0.733,0.706,0.746	-0.248
SE.Cluap1.10.11869314.11869410.11867536.11867620.11871511.11871691	3.90748e-10	0.753,0.653,0.663	0.915,0.94,0.955	-0.247
SE.Slc25a33.5.166706965.166707032.166703220.166703501.166708399.166708500	3.20531e-06	0.669,0.786,0.749	0.945,1.0,1.0	-0.247
SE.Nf2.14.85011273.85011318.84996904.84999209.85012807.85012973	5.41483e-05	0.775,0.497,0.927	0.971,0.968,1.0	-0.247
SE.Giot1.7.13108329.13108390.13105566.13106254.13108596.13108630	0.00017658	0.542,0.472,0.574	0.775,0.754,0.799	-0.247
SE.Rbms1.3.46804370.46804455.46803354.46803651.46805981.46806062	0	0.747,0.673,0.712	0.993,0.964,0.913	-0.246
SE.Zmym2.15.37190899.37190967.37182106.37182319.37191948.37192099	1.64732e-05	0.727,0.651,0.83	0.947,1.0,1.0	-0.246
SE.Cdc14b.17.1715583.1715700.1709702.1711137.1723405.1723503	0.000269912	0.696,0.681,0.762	0.923,0.954,1.0	-0.246
SE.Trdmt1.17.80836879.80836959.80835369.80835713.80838550.80838616	0.00977934	0.847,0.418,1.0	1.0,1.0,1.0	-0.245
MXE.Jmjd1c.20.22796062.22796168.22822065.22822179.22792724.22792917.22856524.22856689	1.87248e-05	0.608,0.666,0.658	0.845,0.937,0.882	-0.244
SE.Tcf25.19.56210183.56210297.56209746.56209819.56212626.56213310	0	0.688,0.77,0.644	0.951,0.978,0.902	-0.243
SE.Mbnl2.15.105772308.105772403.105764134.105764288.105795143.105797932	0	0.095,0.111,0.162	0.423,0.347,0.326	-0.243
SE.Pdlim5.2.247892769.247892787.247892368.247892460.247894038.247894081	5.79981e-13	0.073,0.077,0.088	0.427,0.339,0.2	-0.243
SE.Abcg3l1.14.6530172.6530287.6529533.6529686.6531141.6531201	1.65278e-05	1.0,0.649,0.623	1.0,1.0,1.0	-0.243
SE.Fam184a.20.34951021.34951168.34942979.34943079.34951603.34951788	0.0281892	0.706,0.793,0.463	0.801,0.889,1.0	-0.243
SE.Nexn.2.257468601.257468643.257467154.257467343.257472128.257472277	0	0.687,0.661,0.714	0.918,0.941,0.93	-0.242
SE.Arhgap1.3.80556666.80556725.80555195.80555305.80559029.80559187	2.17639e-09	0.621,0.58,0.634	0.915,0.818,0.827	-0.242
SE.Tmpo.7.31853116.31853212.31852636.31852747.31858706.31858804	1.6415e-07	0.626,0.735,0.661	0.908,0.943,0.896	-0.242
SE.E2f5.2.88354476.88354612.88353339.88353607.88356106.88356150	0.000256223	0.717,1.0,0.558	1.0,1.0,1.0	-0.242
SE.Rarg.7.143861936.143862180.143858545.143858871.143862929.143863186	0.03501	0.669,0.614,0.802	0.812,1.0,1.0	-0.242
A5SS.Fam149b1.15.4395111.4395316.4395188.4395316.4392149.4392292	0.00958782	0.417,0.524,0.452	0.72,0.696,0.703	-0.242
MXE.Pls3.X.119091790.119092020.119105615.119105664.119090867.119091031.119106374.119106504	0.000330394	0.669,0.672,0.759	1.0,0.823,1.0	-0.241
A5SS.C1qtnf7.14.72121645.72122158.72121955.72122158.72018038.72018138	5.88484e-05	0.805,0.747,0.725	1.0,1.0,1.0	-0.241
SE.Prdm4.7.23974833.23974919.23973297.23973416.23975990.23976118	3.61328e-05	0.937,0.6,0.744	1.0,1.0,1.0	-0.24
SE.Spag9.10.81815434.81815473.81814247.81814361.81816468.81816645	0	0.706,0.779,0.716	0.97,0.974,0.975	-0.239
SE.RGD1304728.10.58739751.58739833.58733550.58733671.58740914.58741100	0.0107016	0.572,0.677,0.766	0.932,0.868,0.932	-0.239
SE.Gtpbp8.11.60909410.60909541.60907859.60907958.60910804.60910904	0.0280059	0.589,0.683,0.804	0.944,0.912,0.936	-0.239
SE.Pmm2.10.7068852.7069087.7068046.7068138.7071462.7071574	2.78651e-05	0.62,0.64,0.661	0.889,0.879,0.867	-0.238
SE.Ttc3.11.34636145.34636308.34631079.34631134.34637280.34637326	2.54097e-09	0.575,0.615,0.668	0.842,0.877,0.851	-0.237
SE.LOC100909712.2.157756799.157756872.157752845.157752966.157758461.157758571	2.63209e-07	0.16,0.2,0.287	0.485,0.462,0.411	-0.237
SE.Elf2.2.140323404.140323640.140322464.140322638.140324465.140324579	5.67628e-05	0.147,0.228,0.202	0.47,0.447,0.371	-0.237
SE.Ccdc130.19.25369556.25369729.25368362.25368501.25369805.25369959	0.0420808	0.814,0.593,0.882	1.0,1.0,1.0	-0.237
SE.Pi4kb.2.196145508.196145627.196139754.196140092.196148405.196149342	1.12652e-10	0.017,0.025,0.043	0.252,0.304,0.238	-0.236
SE.Pprc1.1.265815951.265816053.265815689.265815839.265816148.265819005	2.64692e-06	0.787,0.85,0.596	1.0,0.942,1.0	-0.236
SE.Tfb2m.13.97825571.97825701.97823982.97824045.97829687.97829836	0.00253682	0.519,1.0,0.71	0.938,1.0,1.0	-0.236
SE.Neo1.8.63660911.63661070.63657155.63657419.63664705.63664798	9.18918e-10	0.736,0.737,0.74	0.978,0.94,1.0	-0.235
SE.Setdb1.2.196516338.196516438.196515539.196515665.196525919.196526188	0.000275281	0.785,0.666,0.762	1.0,0.919,1.0	-0.235
SE.Eif1a.18.40587349.40587392.40586314.40586501.40596078.40597671	0.010832	0.709,0.445,0.592	0.863,0.861,0.728	-0.235
SE.Trmt5.6.96167165.96167290.96165561.96166213.96171576.96171779	0.0207092	0.914,0.448,0.841	0.909,1.0,1.0	-0.235
MXE.Acta2.1.252547558.252547611.252550033.252550148.252546868.252546997.252550360.252550394	0.00687471	0.662,0.592,0.447	0.74,0.814,0.853	-0.235
SE.Ankrd10.16.83214902.83215142.83213152.83213244.83222214.83222450	4.33716e-11	0.127,0.059,0.107	0.343,0.271,0.381	-0.234
SE.Dmxl2.8.58978706.58978817.58976257.58976427.58982553.58984230	0.0265201	0.515,1.0,0.464	1.0,1.0,0.68	-0.234
SE.Cluap1.10.11874498.11874610.11872685.11872770.11877420.11877584	2.05121e-05	0.835,0.538,0.835	0.922,0.986,1.0	-0.233
MXE.Wisp2.3.160208395.160208502.160211891.160212059.160207912.160208200.160215416.160215671	1.27823e-10	0.246,0.154,0.221	0.383,0.483,0.454	-0.233
SE.Macf1.5.141075460.141075469.141074382.141074614.141076124.141076328	0	0.746,0.726,0.762	0.979,0.973,0.979	-0.232
SE.Usp34.14.108250174.108250299.108249954.108250059.108259610.108259690	6.50009e-08	0.721,0.715,0.801	1.0,0.932,1.0	-0.232
SE.Ist1.19.41985948.41986041.41984664.41984877.41987362.41987411	0.000180293	0.743,0.511,0.824	0.941,0.886,0.946	-0.232
SE.Rif1.3.37642581.37642659.37638074.37638971.37642749.37642865	0.00084306	0.797,0.746,0.76	1.0,1.0,1.0	-0.232
SE.Myo9b.16.19732065.19732253.19727735.19727814.19732535.19732575	0.00137978	0.642,0.742,0.825	1.0,0.906,1.0	-0.232
SE.Sp140.9.92643133.92643184.92641554.92641656.92644772.92644838	0.00244418	0.38,0.564,0.416	0.649,0.744,0.664	-0.232
SE.Osbpl3.4.80081266.80081359.80080130.80080287.80081554.80081658	0.00760917	0.739,0.582,0.544	1.0,0.917,0.643	-0.232
SE.Pdlim5.2.247892772.247892787.247892368.247892460.247894038.247894081	0	0.056,0.057,0.08	0.387,0.303,0.195	-0.231
SE.Gstp1.1.219293536.219293641.219293348.219293436.219294076.219294147	3.31149e-07	0.761,0.686,0.814	0.986,0.968,1.0	-0.231
SE.Usp47.1.176910674.176910734.176908293.176908461.176913632.176913709	5.32653e-07	0.9,0.757,0.651	1.0,1.0,1.0	-0.231
A5SS.Adamtsl4.2.197814492.197814808.197814775.197814808.197812316.197812528	3.83406e-05	0.754,0.768,0.651	0.949,1.0,0.916	-0.231
SE.Axl.1.82566983.82567134.82563906.82564039.82568169.82568380	4.43208e-06	0.619,0.494,0.569	0.764,0.878,0.73	-0.23
SE.Gtse1.7.126748108.126748181.126743757.126744132.126750463.126750700	9.15863e-05	0.585,0.71,1.0	1.0,1.0,0.983	-0.229
SE.Nfrkb.8.32541186.32541260.32540470.32540572.32542043.32542128	0.034153	0.424,0.863,0.731	1.0,0.955,0.75	-0.229
MXE.Wisp2.3.160208389.160208502.160211891.160212059.160207912.160208200.160215416.160215671	1.23259e-10	0.237,0.15,0.228	0.38,0.475,0.446	-0.229
SE.Zscan12.17.45281152.45281297.45279161.45280430.45283849.45284256	0.000785396	0.817,0.85,0.569	1.0,1.0,0.919	-0.228
A5SS.Col5a1.3.6570755.6570954.6570755.6570824.6574346.6574580	0	0.079,0.054,0.089	0.355,0.288,0.264	-0.228
SE.Ankrd10.16.83214929.83215142.83213152.83213244.83222214.83222450	4.33716e-11	0.113,0.059,0.105	0.34,0.262,0.355	-0.227
SE.Crem.17.57079311.57079393.57074524.57074609.57082569.57082726	6.65817e-06	0.036,0.028,0.058	0.354,0.309,0.141	-0.227
SE.Dut.3.117524778.117524865.117524572.117524647.117525086.117525446	1.1121e-08	0.75,0.648,0.641	0.827,0.941,0.949	-0.226
SE.Arfip1.2.183535765.183535818.183534320.183534433.183542106.183542215	0.000989977	0.331,0.211,0.206	0.518,0.535,0.372	-0.226
SE.Arfip1.2.183535765.183535861.183534320.183534433.183542106.183542215	2.02127e-08	0.615,0.53,0.543	0.811,0.831,0.72	-0.225
SE.Ilf3.8.22424991.22425169.22424310.22424540.22427889.22428037	4.7952e-06	0.796,0.685,0.664	0.932,0.936,0.951	-0.225
SE.Lrpprc.6.8052791.8053013.8051015.8051137.8054127.8054321	9.16579e-05	0.62,1.0,0.706	1.0,1.0,1.0	-0.225
SE.Msl1.10.86717631.86717679.86715369.86715752.86718139.86718204	0.0026769	0.482,0.709,0.821	1.0,0.957,0.729	-0.225
MXE.Wisp2.3.160208378.160208502.160211891.160212059.160207912.160208200.160215416.160215671	5.3881e-11	0.228,0.149,0.224	0.371,0.468,0.438	-0.225
SE.Zfp276.19.56056290.56056337.56055708.56056012.56056425.56056866	0.00760913	0.557,1.0,0.772	1.0,1.0,1.0	-0.224
SE.Zfp354a.10.36590542.36590641.36589939.36590066.36598146.36599618	0.0101921	0.765,0.556,0.59	1.0,0.833,0.75	-0.224
SE.LOC100910506.X.10126839.10126908.10124240.10124309.10128286.10128322	0.000350432	0.125,0.093,0.095	0.416,0.312,0.254	-0.223
SE.LOC683897.20.48282143.48282233.48276437.48276590.48284403.48284885	0.00151284	0.669,0.663,1.0	1.0,1.0,1.0	-0.223
SE.Map9.2.181332386.181332533.181331463.181331630.181333254.181333339	0.0174773	0.56,0.828,0.738	1.0,0.796,1.0	-0.223
SE.Zc3h14.6.122764983.122765012.122763493.122763614.122765271.122765467	2.14721e-10	0.779,0.79,0.726	1.0,0.988,0.973	-0.222
SE.Tmem175.14.2088692.2088744.2088421.2088457.2090936.2091031	0.000132495	0.759,0.671,0.683	0.936,0.912,0.931	-0.222
SE.Bphl.17.31508416.31508540.31498882.31499269.31511616.31511748	0.000328281	0.629,0.768,0.663	1.0,0.94,0.787	-0.222
SE.Abcg3l3.14.6074512.6074627.6073453.6073513.6075115.6075268	0.00104207	0.826,0.481,1.0	0.973,1.0,1.0	-0.222
SE.Trdmt1.17.80836879.80836963.80835369.80835713.80838550.80838616	0.00615232	0.856,0.479,1.0	1.0,1.0,1.0	-0.222
MXE.Pls3.X.119052026.119052143.119076730.119076854.119030418.119030494.119078761.119078842	0.0240168	0.0,0.106,0.076	0.321,0.069,0.458	-0.222
A5SS.Rpl10.X.156439061.156439218.156439079.156439218.156438815.156438893	7.95835e-06	0.69,0.866,0.778	1.0,1.0,1.0	-0.222
SE.Phldb2.11.57460540.57460681.57454353.57454443.57462008.57462108	0	0.747,0.747,0.712	0.974,0.959,0.935	-0.221
SE.Mbnl1.2.150864085.150864121.150858305.150858459.150864801.150864896	7.92783e-10	0.151,0.042,0.164	0.353,0.384,0.282	-0.221
MXE.Mff.9.90893518.90893593.90901832.90901865.90891864.90891953.90903419.90903479	0.00110502	0.67,0.51,0.671	0.783,0.827,0.905	-0.221
SE.Plcb4.3.128922548.128922584.128919216.128919317.128924472.128924626	1.16889e-06	0.135,0.131,0.099	0.316,0.268,0.441	-0.22
SE.Pde4dip.2.199888275.199888377.199882494.199882743.199888980.199889204	0.0235702	0.322,0.114,0.212	0.542,0.435,0.33	-0.22
SE.Taf5.1.266857116.266857281.266855294.266855424.266858305.266858483	0.00126062	0.643,0.83,0.704	1.0,1.0,0.83	-0.218
SE.LOC683897.20.48282143.48282211.48276437.48276590.48284403.48284885	0.00200965	0.688,0.658,1.0	1.0,1.0,1.0	-0.218
SE.Ska2.10.74424572.74424749.74421272.74421359.74431042.74431922	0.00784517	0.029,0.133,0.183	0.345,0.405,0.25	-0.218
A5SS.Ufd1l.11.86326127.86326347.86326240.86326347.86325822.86325855	0.0009112	0.544,0.468,0.572	0.728,0.752,0.758	-0.218
SE.Akip1.1.174331927.174332054.174330910.174331101.174334262.174334376	1.55168e-06	0.814,0.625,0.761	0.94,0.954,0.958	-0.217
SE.Lrrc40.2.264870146.264870393.264868075.264868261.264871215.264871345	0.015854	0.103,0.209,0.141	0.346,0.34,0.417	-0.217
SE.Commd9.3.91473604.91473715.91471703.91471829.91476316.91476467	0.0332844	0.85,0.386,0.892	1.0,0.92,0.86	-0.217
MXE.Usp28.8.53327591.53327705.53329011.53329164.53322477.53322557.53329394.53329522	0.000440775	0.78,0.628,0.78	0.917,0.921,1.0	-0.217
SE.Mia2.6.80237035.80237062.80235399.80235471.80237536.80237647	1.81253e-05	0.086,0.055,0.17	0.353,0.331,0.275	-0.216
SE.Mia2.6.80235399.80235471.80228146.80228235.80237536.80237647	0.000207348	0.739,0.635,0.666	0.841,0.874,0.972	-0.216
SE.Dnajc18.18.28495181.28495265.28493583.28493770.28495782.28495937	0.00210597	0.19,0.189,0.153	0.37,0.533,0.276	-0.216
SE.Slc25a36.8.104974182.104974414.104970035.104970220.104977289.104977390	9.22395e-12	0.08,0.104,0.086	0.304,0.294,0.316	-0.215
SE.Fam76a.5.151104346.151104439.151095757.151095893.151107165.151107323	6.35123e-05	0.811,0.705,0.679	0.935,1.0,0.905	-0.215
SE.Ccser2.16.14105397.14105482.14095057.14095320.14111118.14111208	0.00125251	0.324,0.381,0.311	0.56,0.606,0.494	-0.215
SE.Erbb2.10.86382959.86383159.86382751.86382842.86383638.86383771	0.00654636	0.453,1.0,0.799	0.898,1.0,1.0	-0.215
SE.Senp1.7.139667796.139667832.139663644.139663816.139668365.139668525	0.0359819	0.297,0.0,0.0	0.344,0.257,0.337	-0.214
MXE.Tbcd.10.110665497.110665630.110680098.110680144.110653305.110653361.110681853.110681986	9.26629e-06	0.502,0.489,0.511	0.684,0.793,0.668	-0.214
A5SS.Rcbtb2.15.55043606.55043734.55043606.55043689.55046517.55046611	0.0127083	0.048,0.158,0.0	0.265,0.486,0.098	-0.214
SE.Arhgef10l.5.159072315.159072330.159071900.159072082.159074506.159074652	4.04666e-05	0.532,0.48,0.665	0.781,0.808,0.726	-0.213
SE.Armc6.16.20948866.20948914.20945039.20945122.20951615.20951747	0.000281216	0.574,1.0,0.696	1.0,1.0,0.91	-0.213
MXE.Vrk1.6.129838923.129839071.129864988.129865153.129835918.129836208.129878416.129878486	0.00167328	0.036,0.114,0.195	0.302,0.373,0.31	-0.213
A5SS.Ttc3.11.34611538.34611724.34611538.34611627.34612626.34612781	0.0114203	0.849,0.574,0.701	0.954,0.843,0.966	-0.213
A5SS.Il17rc.4.145436552.145436714.145436552.145436668.145436865.145436987	0.0370531	0.606,0.705,0.577	0.827,0.785,0.914	-0.213
SE.Dmd.X.53462397.53462463.53456986.53457123.53463504.53463570	6.46135e-12	0.787,0.748,0.812	1.0,0.983,1.0	-0.212
SE.Itpr1.4.140398423.140398464.140396681.140396777.140401962.140402117	2.41282e-06	0.272,0.32,0.209	0.512,0.476,0.448	-0.212
SE.Camk2g.15.3983819.3983888.3974330.3974374.3985004.3985049	0.00441699	0.127,0.217,0.187	0.371,0.531,0.266	-0.212
SE.Ptk2b.15.42837042.42837168.42832442.42832589.42839260.42839326	0.0254716	0.574,0.77,0.755	1.0,0.902,0.833	-0.212
MXE.Wisp2.3.160208395.160208502.160211891.160212116.160207912.160208200.160215416.160215671	7.18281e-11	0.211,0.119,0.198	0.333,0.425,0.407	-0.212
SE.Frem1.5.101104436.101104604.101101477.101101686.101105814.101105905	0.000448977	0.597,0.769,1.0	1.0,1.0,1.0	-0.211
SE.Ankzf1.9.82397683.82397930.82397482.82397541.82398833.82399314	0.00172986	0.512,0.863,0.879	0.929,0.959,1.0	-0.211
SE.Kirrel.2.186480145.186480288.186439476.186439641.186514917.186515135	0.00356083	0.667,0.476,0.667	0.836,0.827,0.78	-0.211
SE.Slc26a11.10.108481520.108481713.108480367.108480550.108482578.108482664	0.00488607	0.647,1.0,0.613	0.891,1.0,1.0	-0.21
SE.Ugdh.14.44495270.44495383.44492822.44492946.44496990.44497121	1.03573e-10	0.751,0.709,0.875	0.986,0.994,0.982	-0.209
SE.Cox20.13.96222730.96222845.96219852.96220140.96223462.96224023	7.71397e-08	0.634,0.758,0.937	0.989,0.967,1.0	-0.209
A5SS.Fam149b1.15.4395186.4395316.4395188.4395316.4392149.4392292	0.00527853	0.576,0.657,0.567	0.822,0.809,0.797	-0.209
SE.Actn1.6.103379819.103379900.103378007.103378166.103380858.103381005	0	0.722,0.908,0.737	0.999,0.991,1.0	-0.208
SE.Srpx2.X.104734610.104734662.104734081.104734447.104736094.104736308	5.75535e-08	0.758,0.603,0.729	0.865,0.929,0.921	-0.208
SE.Mbnl1.2.150864801.150864896.150858410.150858459.150867718.150867793	5.58538e-07	0.208,0.234,0.225	0.521,0.434,0.337	-0.208
SE.Itpr1.4.140398419.140398464.140396681.140396777.140401962.140402117	9.64567e-10	0.561,0.623,0.52	0.819,0.754,0.752	-0.207
MXE.Wisp2.3.160208389.160208502.160211891.160212116.160207912.160208200.160215416.160215671	8.39578e-11	0.203,0.116,0.205	0.33,0.417,0.399	-0.207
MXE.Wisp2.3.160208357.160208502.160211891.160212059.160207912.160208200.160215416.160215671	1.65687e-08	0.228,0.17,0.267	0.37,0.472,0.443	-0.207
SE.Snapc3.5.101534430.101534515.101527575.101527653.101541039.101541144	2.32891e-06	0.607,0.683,0.734	0.918,0.867,0.857	-0.206
MXE.Nav2.1.104785949.104787042.104795175.104795565.104750773.104750940.104821853.104821976	7.64766e-08	0.423,0.375,0.412	0.613,0.61,0.605	-0.206
SE.Csnk2a2.19.9983208.9983310.9973287.9973399.9994984.9995044	9.02225e-05	0.726,0.675,0.86	1.0,0.903,0.972	-0.205
SE.Gls2.7.2617101.2617196.2616818.2616869.2619164.2619296	0.00193309	0.79,0.595,0.853	0.921,1.0,0.93	-0.204
SE.Irak3.7.64961052.64961215.64960514.64960569.64965142.64965325	0.00449368	0.787,0.751,0.85	1.0,1.0,1.0	-0.204
MXE.Wisp2.3.160208378.160208502.160211891.160212116.160207912.160208200.160215416.160215671	3.57396e-11	0.195,0.115,0.2	0.321,0.409,0.391	-0.204
A5SS.Mfge8.1.140846150.140846244.140846181.140846244.140845464.140845786	0.00266663	0.727,0.712,0.579	0.819,0.868,0.944	-0.204
SE.Irf9.15.34284887.34285002.34284647.34284721.34285102.34285174	1.34164e-05	0.714,1.0,0.654	1.0,0.978,1.0	-0.203
SE.Rev3l.20.44947826.44947964.44943705.44943820.44948864.44948923	2.09293e-05	0.821,0.809,0.761	1.0,1.0,1.0	-0.203
SE.Gng8.1.78819038.78819275.78818403.78818948.78821681.78821767	8.2416e-05	0.075,0.081,0.14	0.3,0.282,0.324	-0.203
SE.Sp140.9.92641554.92641656.92636850.92636931.92647069.92647147	0.00267061	0.582,0.57,0.704	0.781,0.849,0.835	-0.203
SE.Bard1.9.78334181.78334262.78332644.78332817.78341844.78342782	0.0180083	0.585,0.925,0.681	0.862,0.939,1.0	-0.203
SE.RGD1565536.3.110555419.110555596.110553698.110553942.110555796.110555910	0.0314466	0.683,1.0,0.526	0.956,0.974,0.888	-0.203
SE.Atp9b.18.77360250.77360395.77359947.77360012.77362636.77362726	6.45038e-11	0.926,0.722,0.747	1.0,1.0,1.0	-0.202
SE.Srpk2.4.8162138.8162268.8148912.8149019.8163383.8163409	5.17243e-06	0.73,0.909,0.756	1.0,1.0,1.0	-0.202
SE.Clk4.10.36721730.36721796.36720699.36720860.36725382.36725605	3.82025e-05	0.039,0.083,0.102	0.257,0.385,0.188	-0.202
SE.Dhodh.19.42072848.42072931.42070743.42070943.42078042.42078230	0.0105116	0.698,0.696,1.0	1.0,1.0,1.0	-0.202
MXE.Ints6.15.45869398.45869525.45870880.45871093.45863204.45863567.45872078.45872189	2.11416e-06	0.588,0.628,0.633	0.821,0.779,0.856	-0.202
MXE.Lrch3.11.71035891.71035942.71037755.71037905.71030666.71030730.71038440.71038492	0.0128261	0.546,0.635,0.415	0.731,0.779,0.693	-0.202
SE.Sqstm1.10.35711979.35712060.35707350.35707571.35713295.35713423	1.61339e-08	0.59,0.693,0.539	0.827,0.799,0.799	-0.201
SE.Ankrd10.16.83217817.83217979.83213152.83213244.83222214.83222450	1.28016e-05	0.096,0.066,0.087	0.264,0.192,0.397	-0.201
SE.Znf740.7.143813885.143814035.143810891.143811209.143814342.143814472	1.83772e-05	0.962,0.682,0.716	1.0,0.962,1.0	-0.201
SE.Sync.5.147495787.147495864.147482282.147483432.147498271.147498902	3.61269e-09	0.78,0.822,0.767	1.0,0.97,1.0	-0.2
SE.Vldlr.1.245256105.245256294.245254737.245254855.245257908.245258280	0.000146685	0.88,0.552,0.858	0.961,0.982,0.948	-0.2
SE.Phldb2.11.57457676.57457796.57454353.57454443.57460540.57460681	0.000687657	0.0,0.136,0.104	0.395,0.318,0.128	-0.2
SE.Zcchc17.5.148554113.148554209.148548548.148548649.148555926.148556027	0.0111079	0.61,0.749,0.624	0.819,0.922,0.841	-0.2
SE.Map4k4.9.46759171.46759402.46756870.46757032.46760210.46760317	0.0288885	0.65,0.479,0.632	0.741,0.804,0.816	-0.2
A3SS.Erich1.16.80665765.80665957.80665768.80665957.80662285.80662714	0.0116076	0.681,0.647,0.872	0.956,0.914,0.931	-0.2
SE.LOC108348154.14.109540344.109540524.109538194.109538293.109543392.109543491	0.00452019	0.053,0.124,0.105	0.134,0.369,0.376	-0.199
MXE.Mtrf1.15.61664225.61664335.61665893.61666319.61662263.61662287.61667132.61667224	0.00140288	0.215,0.106,0.078	0.432,0.331,0.232	-0.199
MXE.Pqlc3.6.42297487.42297545.42299362.42299525.42293838.42293880.42299643.42299726	0.0338754	0.231,0.135,0.082	0.344,0.35,0.35	-0.199
MXE.Znf740.7.143811288.143811412.143813940.143814035.143810891.143811209.143814342.143814468	0.0361909	0.068,0.179,0.221	0.295,0.35,0.42	-0.199
SE.Rabggtb.2.260113659.260113757.260111256.260111406.260113857.260113963	1.14752e-06	0.893,0.761,0.751	1.0,1.0,1.0	-0.198
SE.N4bp1.19.21258464.21258561.21256613.21256744.21261257.21261365	7.91458e-06	0.906,0.861,0.621	1.0,0.981,1.0	-0.198
SE.Cdc14b.17.1719574.1719721.1709702.1711137.1723405.1723503	0.00139883	0.743,0.682,0.886	0.954,0.952,1.0	-0.198
SE.Znf740.7.143811288.143811412.143810891.143811209.143813885.143814035	0.00814333	0.157,0.199,0.2	0.364,0.442,0.344	-0.198
MXE.Hacd1.17.81177594.81177773.81182345.81182467.81173712.81173880.81187237.81187326	0	0.06,0.029,0.065	0.263,0.235,0.248	-0.197
SE.Dmpk.1.79998084.79998170.79997731.79997778.79998490.79999364	1.76166e-07	0.836,0.65,0.774	0.977,0.988,0.883	-0.196
MXE.Tiam2.1.44418728.44418893.44421672.44421741.44393307.44393411.44422550.44422676	0.0495696	0.656,0.892,0.517	0.95,0.84,0.864	-0.196
SE.Tnfrsf12a.10.12996911.12997065.12996595.12996730.12997807.12997930	0	0.796,0.798,0.803	1.0,0.994,0.989	-0.195
SE.Wdr34.3.8602336.8602446.8601538.8601696.8605658.8605910	2.37866e-05	0.755,0.892,0.768	1.0,1.0,1.0	-0.195
SE.LOC100909712.2.157756725.157756872.157752845.157752966.157758461.157758571	0.000314083	0.129,0.217,0.232	0.488,0.339,0.337	-0.195
SE.St6gal1.11.80978667.80978828.80977208.80977854.80981289.80981415	0.00106291	0.075,0.0,0.036	0.297,0.297,0.101	-0.195
SE.Camkk2.12.39294462.39294591.39293176.39293264.39298925.39299026	0.00477999	0.749,0.666,0.737	0.897,0.889,0.951	-0.195
SE.Uckl1.3.177067188.177067302.177066994.177067073.177067379.177067478	0.00515635	0.867,0.746,0.641	0.944,0.981,0.913	-0.195
SE.Atp7a.X.77102654.77102765.77076150.77076256.77119913.77120051	0.0235735	0.125,0.057,0.103	0.174,0.299,0.398	-0.195
SE.Nup85.10.104133927.104134011.104131202.104131309.104134155.104134221	3.48672e-07	0.72,0.945,0.753	1.0,1.0,1.0	-0.194
SE.Commd9.3.91473547.91473715.91471703.91471829.91476316.91476420	0.0110765	0.908,0.484,0.912	1.0,0.94,0.946	-0.194
SE.Dvl1.5.173304201.173304279.173304014.173304082.173304830.173304966	2.78672e-10	0.809,0.703,0.853	0.99,0.983,0.972	-0.193
SE.Map4k4.9.46767187.46767379.46766130.46766251.46769648.46769766	4.51444e-06	0.496,0.538,0.468	0.728,0.735,0.619	-0.193
SE.Rab7b.13.48474076.48474202.48465979.48466195.48480476.48482138	0.000164851	0.924,0.734,0.701	1.0,0.937,1.0	-0.193
SE.Bptf.10.95292625.95292721.95288569.95290877.95293890.95294029	0.0018789	0.864,0.589,0.848	0.877,1.0,1.0	-0.192
SE.Zkscan5.12.11170236.11170369.11164658.11164724.11174901.11175917	0.00380577	1.0,0.621,0.802	1.0,1.0,1.0	-0.192
SE.Ppm1k.4.88695587.88695679.88694582.88694793.88703407.88703925	0.0305285	0.334,0.401,0.361	0.665,0.519,0.487	-0.192
MXE.Stk3.7.73846641.73846770.73848790.73848871.73834043.73834158.73883595.73883812	3.27875e-07	0.142,0.097,0.145	0.376,0.364,0.221	-0.192
MXE.Nup85.10.104133927.104134011.104134155.104134221.104131202.104131309.104134359.104134511	0.00767319	0.332,0.336,0.415	0.513,0.621,0.526	-0.192
SE.Phtf2.4.10847966.10848046.10823280.10823380.10878543.10878600	2.13594e-06	0.733,0.808,0.824	1.0,1.0,0.937	-0.191
MXE.Actn1.6.103379204.103379376.103379819.103379900.103378007.103378166.103380858.103381005	0	0.697,0.863,0.746	0.978,0.98,0.922	-0.191
MXE.Cdk11b.5.173052686.173052810.173052882.173052929.173052062.173052093.173054110.173054226	0.00968171	0.763,0.686,0.649	0.921,0.876,0.875	-0.191
MXE.Oxnad1.16.8212956.8213020.8217062.8217204.8212517.8212652.8231481.8231724	0.0114767	0.35,0.285,0.222	0.513,0.503,0.413	-0.191
SE.Fam188a.17.79783658.79783829.79777137.79777211.79785517.79785578	3.77738e-06	0.765,0.741,0.762	0.917,0.921,1.0	-0.19
SE.Pmm2.10.7068852.7068899.7068046.7068138.7071462.7071574	0.000189133	0.69,0.719,0.699	0.91,0.905,0.864	-0.19
SE.Spata7.6.122609714.122609810.122607271.122607346.122613986.122614009	0.000239339	0.814,0.761,0.745	1.0,0.949,0.942	-0.19
SE.Parp14.11.68125726.68125802.68123083.68123305.68126365.68126515	0.000358527	0.919,0.843,0.586	1.0,0.981,0.937	-0.19
SE.Anks1a.20.7562007.7562083.7561056.7561353.7562319.7562421	0.00730167	0.841,0.782,0.653	0.911,0.936,1.0	-0.19
SE.Kdm5c.X.22346814.22346878.22345941.22346523.22347023.22347223	0.0156602	0.603,0.864,0.806	1.0,0.842,1.0	-0.19
SE.Mon2.7.66778144.66778162.66777432.66777576.66778438.66778567	0.0011055	0.182,0.159,0.201	0.428,0.285,0.395	-0.189
MXE.Jmjd1c.20.22796062.22796168.22822065.22822179.22784470.22786641.22856524.22856689	0.000652127	0.665,0.709,0.786	0.908,0.937,0.882	-0.189
A5SS.Pdzd11.X.70460490.70461004.70460904.70461004.70460230.70460287	0.0461888	0.656,0.646,0.703	0.837,0.903,0.832	-0.189
SE.U2surp.8.103288717.103288849.103284120.103284219.103290555.103290600	0.000102953	0.72,0.658,0.692	0.79,0.864,0.98	-0.188
SE.Vldlr.1.245256105.245256351.245254737.245254855.245257908.245258280	0.00016849	0.886,0.571,0.873	0.962,0.982,0.951	-0.188
MXE.Tfdp2.8.104152320.104152499.104154685.104154832.104148463.104148511.104157474.104157543	0.0198209	0.188,0.185,0.312	0.419,0.381,0.448	-0.188
MXE.Cramp1.10.14338717.14338899.14340536.14340714.14338553.14338628.14343025.14344201	0.0300947	0.315,0.367,0.383	0.546,0.547,0.537	-0.188
A3SS.LOC688906.7.137807447.137807570.137807447.137807567.137807940.137808111	0.000873118	0.152,0.115,0.107	0.377,0.312,0.25	-0.188
SE.Sorbs1.1.259481591.259481681.259479326.259479455.259484490.259484569	0.0349658	0.078,0.221,0.118	0.505,0.265,0.208	-0.187
MXE.Wisp2.3.160208357.160208502.160211891.160212116.160207912.160208200.160215416.160215671	2.25409e-08	0.195,0.132,0.241	0.32,0.414,0.395	-0.187
A5SS.Tanc1.3.45863233.45863356.45863233.45863335.45864233.45864515	0.000375423	0.064,0.0,0.061	0.321,0.255,0.11	-0.187
SE.Akip1.1.174331969.174332054.174330910.174331101.174334262.174334376	5.67846e-07	0.85,0.685,0.792	0.954,0.963,0.968	-0.186
SE.Nr1d1.10.86687295.86687384.86687057.86687202.86687649.86687988	0.0347268	0.765,0.579,0.668	0.703,1.0,0.868	-0.186
SE.Cox20.13.96222934.96222998.96219852.96220140.96223462.96224023	6.69679e-09	0.742,0.732,0.93	0.991,0.967,1.0	-0.185
SE.Cast.2.1508220.1508334.1506310.1506323.1508807.1508861	4.23163e-07	0.566,0.453,0.483	0.668,0.72,0.668	-0.185
SE.Tdrd7.5.61591965.61592183.61589816.61589890.61603852.61604436	0.00514508	0.808,0.574,0.888	0.97,0.914,0.941	-0.185
SE.Myo9b.16.19728833.19728923.19727732.19727814.19730695.19730809	0.00584256	0.363,0.387,0.5	0.626,0.633,0.546	-0.185
SE.Kirrel.2.186480145.186480291.186439476.186439641.186514917.186515135	0.00696949	0.703,0.517,0.688	0.846,0.841,0.777	-0.185
SE.RGD1565536.3.110552339.110552539.110552056.110552096.110552627.110552718	0	0.054,0.034,0.048	0.189,0.287,0.213	-0.184
SE.Tmpo.7.31853309.31853429.31853116.31853212.31858706.31858804	1.78098e-08	0.842,0.705,0.855	0.995,0.977,0.982	-0.184
SE.Mff.9.90893518.90893593.90891864.90891953.90901832.90901865	1.73565e-06	0.742,0.75,0.799	0.983,0.944,0.917	-0.184
SE.Brwd1.11.36360758.36360800.36358635.36358767.36361029.36361102	2.56467e-06	0.761,0.75,0.938	1.0,1.0,1.0	-0.184
SE.Zc3h14.6.122760157.122760390.122754129.122754204.122763493.122763614	2.78362e-06	0.511,0.46,0.51	0.651,0.72,0.663	-0.184
SE.Actn4.1.87079956.87080022.87079315.87079474.87080946.87081093	0.00299124	0.156,0.122,0.169	0.375,0.348,0.275	-0.184
SE.Cdc26.5.78264155.78264263.78262674.78262845.78266995.78267063	0.00415204	0.568,0.585,0.522	0.77,0.674,0.782	-0.184
SE.Heg1.11.70296512.70296803.70287729.70288068.70299718.70300006	0.00729634	0.784,0.665,1.0	1.0,1.0,1.0	-0.184
SE.Zfp280d.8.78874054.78874199.78872101.78872145.78876352.78876499	0.00984172	0.111,0.096,0.122	0.229,0.4,0.253	-0.184
A5SS.Myl6.7.2906574.2906639.2906623.2906639.2906136.2906318	0.00111317	0.703,0.77,0.784	0.961,0.904,0.944	-0.184
A3SS.Herc1.8.72126969.72127146.72126972.72127146.72124846.72124957	0.040004	0.692,0.73,0.519	0.856,0.842,0.795	-0.184
SE.RGD1307830.13.67600849.67600990.67600086.67600182.67601622.67601659	1.29403e-09	0.789,0.892,0.741	1.0,1.0,0.971	-0.183
SE.Slc8a1.6.4311750.4311765.4307774.4307843.4311871.4311889	2.10067e-05	0.044,0.029,0.0	0.379,0.112,0.131	-0.183
SE.Ccser2.16.14105393.14105482.14095057.14095320.14111118.14111208	0.00519439	0.185,0.184,0.185	0.399,0.404,0.3	-0.183
SE.Pbrm1.16.7195215.7195371.7188500.7188702.7198286.7198357	0.014559	0.32,0.195,0.244	0.507,0.49,0.312	-0.183
SE.Slc25a36.8.104973727.104973830.104970035.104970220.104977289.104977390	3.99777e-07	0.05,0.079,0.089	0.323,0.23,0.211	-0.182
SE.Prkab2.2.199835992.199836159.199832390.199832568.199837423.199837517	0.0425489	0.793,0.508,0.809	0.907,0.968,0.78	-0.182
SE.RGD1307947.7.40314252.40314414.40312470.40312588.40315210.40315408	0.0462513	0.0,0.0,0.012	0.073,0.053,0.431	-0.182
MXE.Slc4a7.15.11872358.11872516.11874561.11874677.11870890.11870978.11881741.11881930	0.000107206	0.196,0.258,0.129	0.388,0.387,0.353	-0.182
SE.Ezh2.4.77295620.77295787.77295142.77295237.77296803.77297044	0.00338483	0.591,1.0,0.775	0.982,1.0,0.928	-0.181
SE.RGD1565616.3.123320904.123320992.123319606.123319683.123326059.123326096	0.0154408	0.679,0.75,1.0	1.0,1.0,0.973	-0.181
MXE.Tmpo.7.31853108.31853212.31853270.31853429.31852636.31852747.31858706.31858804	5.37398e-08	0.857,0.707,0.843	0.995,0.973,0.983	-0.181
A3SS.Smndc1.1.274100119.274100298.274100119.274100281.274100814.274100957	0.0167936	0.028,0.0,0.101	0.071,0.303,0.299	-0.181
SE.St6galnac4.3.11614486.11614688.11610248.11610434.11616201.11616289	9.91175e-06	0.742,0.893,0.824	1.0,1.0,1.0	-0.18
SE.Pds5b.12.787274.787382.786736.787173.789608.789747	2.69901e-05	0.714,0.774,0.787	0.956,0.94,0.92	-0.18
SE.Plekha1.1.201477145.201477293.201475855.201475948.201478401.201480877	0.00116912	0.753,1.0,0.706	1.0,1.0,1.0	-0.18
SE.LOC102554315.3.145641273.145641334.145639154.145640199.145641527.145641654	0.00401609	0.756,0.877,0.712	0.886,1.0,1.0	-0.18
SE.Ino80c.18.16003552.16003663.15994999.15996970.16009384.16009710	0.00496586	0.88,0.815,0.613	1.0,0.95,0.897	-0.18
A5SS.Nfkbiz.11.47262974.47263186.47262974.47263114.47263608.47263639	0.00020995	0.059,0.102,0.065	0.151,0.268,0.348	-0.18
A5SS.Palld.16.31909478.31909651.31909478.31909512.31918078.31918214	0.0315664	1.0,0.593,0.769	1.0,1.0,0.901	-0.18
A3SS.Vcl.15.3501471.3501701.3501471.3501597.3503184.3503293	8.95853e-05	0.913,0.734,0.814	1.0,1.0,1.0	-0.18
SE.Tpcn2.1.218432488.218432589.218431840.218431922.218433477.218433542	0.0439535	0.56,1.0,0.904	1.0,1.0,1.0	-0.179
A5SS.Nicn1.8.117066683.117066769.117066683.117066721.117067555.117067781	0.0215539	0.686,0.838,0.642	0.931,1.0,0.771	-0.179
SE.Tia1.4.118228406.118228472.118225295.118225352.118229138.118229214	0.0117949	0.031,0.124,0.114	0.416,0.202,0.184	-0.178
MXE.Arhgap23.10.85405522.85405754.85405771.85405840.85398286.85398430.85406311.85406373	0.00893355	0.196,0.173,0.099	0.393,0.271,0.337	-0.178
A3SS.Anapc5.12.39228002.39228184.39228041.39228184.39226462.39226552	3.03718e-11	0.613,0.665,0.585	0.824,0.826,0.747	-0.178
SE.Pqlc3.6.42295151.42295179.42293838.42293880.42297487.42297545	9.34848e-06	0.657,0.624,0.674	0.811,0.838,0.837	-0.177
MXE.Dcaf6.13.83616628.83616688.83634262.83634520.83606921.83607039.83636127.83636247	7.48677e-08	0.837,0.779,0.758	0.988,0.942,0.975	-0.177
MXE.Epb41l2.1.20909566.20909713.20911504.20911567.20902808.20903369.20916098.20916262	0.00265575	0.27,0.13,0.143	0.425,0.358,0.29	-0.177
SE.Dennd6a.16.2298735.2298816.2289574.2289617.2301290.2301396	2.80991e-06	0.892,0.671,0.909	1.0,1.0,1.0	-0.176
SE.Arhgap1.3.80556666.80556842.80555195.80555305.80559029.80559187	0.0027061	0.072,0.078,0.139	0.338,0.213,0.265	-0.176
SE.Rif1.3.37642159.37642306.37638074.37638971.37642749.37642865	0.0107581	0.866,0.716,0.891	1.0,1.0,1.0	-0.176
MXE.Tcf25.19.56210165.56210297.56212291.56212517.56209746.56209819.56212626.56213310	0.00691438	0.531,0.453,0.48	0.687,0.66,0.644	-0.176
SE.Map2k4.10.52197161.52197211.52196123.52196234.52198813.52198962	0.000107739	0.749,0.933,0.747	0.953,1.0,1.0	-0.175
SE.Sephs1.17.77331120.77331223.77329934.77330089.77333380.77333484	0.000136933	0.802,0.672,0.852	1.0,0.964,0.887	-0.175
SE.Ttc26.4.66130611.66130700.66127966.66128030.66131921.66132005	0.00690505	0.84,0.905,0.653	0.924,1.0,1.0	-0.175
MXE.Myo9b.16.19728833.19728923.19730695.19730809.19727732.19727814.19732535.19732575	0.00161367	0.335,0.311,0.388	0.534,0.448,0.578	-0.175
SE.Ankrd10.16.83217850.83217979.83213152.83213244.83222214.83222450	0.000177295	0.093,0.039,0.081	0.19,0.181,0.364	-0.174
SE.Slc38a6.6.96231891.96231971.96229797.96229851.96232666.96232767	0.0452961	0.768,0.709,0.904	0.904,1.0,1.0	-0.174
MXE.Mbnl1.2.150864085.150864121.150866606.150866670.150858305.150858459.150867718.150867793	1.81569e-08	0.775,0.743,0.872	0.985,0.989,0.939	-0.174
SE.Cd99.20.56195716.56195770.56194975.56195053.56196134.56196170	0	0.79,0.818,0.75	0.958,0.949,0.971	-0.173
SE.Immt.4.99769196.99769313.99768236.99768339.99773138.99773275	1.32107e-05	0.657,0.761,0.829	0.934,0.915,0.917	-0.173
SE.Acly.10.88418134.88418164.88413469.88413611.88419160.88419251	0.00203297	0.346,0.219,0.32	0.447,0.502,0.456	-0.173
SE.Ino80c.18.16001258.16001326.15994999.15996970.16009384.16009710	0.00241976	0.856,0.771,0.678	1.0,0.952,0.872	-0.173
A5SS.Myl6.7.2906570.2906664.2906623.2906664.2906136.2906318	0.00148007	0.727,0.782,0.788	0.961,0.906,0.95	-0.173
SE.Sptan1.3.8570628.8570688.8569444.8569593.8571771.8571970	0	0.147,0.15,0.15	0.317,0.346,0.301	-0.172
SE.Immt.4.99769187.99769313.99768230.99768339.99773138.99773275	9.56104e-06	0.662,0.762,0.83	0.935,0.917,0.917	-0.172
MXE.Pcyt2.10.109791317.109791371.109791689.109791734.109790746.109790885.109791943.109792028	0.00356784	0.754,0.848,0.614	0.938,0.942,0.853	-0.172
MXE.P4ha1.20.28922563.28922595.28933392.28933569.28920615.28920823.28935232.28935335	0.0495872	0.139,0.095,0.095	0.3,0.273,0.271	-0.172
SE.Cdip1.10.10980348.10980461.10967657.10967754.10986126.10986193	1.27471e-08	0.0,0.016,0.014	0.195,0.219,0.129	-0.171
SE.Osbpl11.11.70811584.70811760.70806606.70806783.70820552.70820621	0.00044979	0.739,0.747,1.0	1.0,1.0,1.0	-0.171
SE.Pphln1.7.134659945.134660025.134643600.134643812.134664395.134664515	0.000567861	0.743,0.724,0.897	0.928,0.981,0.969	-0.171
SE.Atg4b.9.100917293.100917387.100915408.100915554.100918365.100918637	0.00216691	1.0,0.634,0.852	1.0,1.0,1.0	-0.171
MXE.Mbnl2.15.105772308.105772403.105789545.105789746.105764134.105764288.105795143.105797932	0.00385597	0.866,0.617,0.782	0.929,0.882,0.967	-0.171
A5SS.Pdlim2.15.51847268.51847373.51847293.51847373.51846996.51847124	0.0032164	0.109,0.172,0.098	0.239,0.4,0.253	-0.171
SE.Slc9a8.3.164202712.164202856.164198650.164198685.164205713.164205852	0.0101859	0.632,0.818,0.945	0.964,0.937,1.0	-0.169
SE.Usp28.8.53340436.53340507.53339194.53339418.53341786.53342015	0.0121054	1.0,0.716,0.777	1.0,1.0,1.0	-0.169
SE.Vipas39.6.111283530.111283590.111282983.111283017.111284752.111284912	0.0132997	0.769,0.679,1.0	1.0,0.954,1.0	-0.169
MXE.Pigk.2.257921955.257922169.257936684.257936885.257919995.257920087.257937493.257937629	0.000191171	0.0,0.0,0.0	0.257,0.09,0.161	-0.169
A5SS.Psmg3.12.16899553.16899790.16899553.16899701.16901461.16901934	8.43613e-06	0.69,0.891,0.775	0.966,0.963,0.935	-0.169
A3SS.Meis3.1.78075666.78075857.78075708.78075857.78075462.78075574	0.000468371	0.052,0.057,0.0	0.216,0.23,0.171	-0.169
SE.Mbnl1.2.150864085.150864121.150858305.150858459.150867718.150867793	0	0.037,0.031,0.059	0.228,0.248,0.156	-0.168
A3SS.Guk1.10.45536970.45537161.45536970.45536991.45538165.45538207	1.46508e-06	0.73,0.835,0.767	0.936,0.962,0.938	-0.168
SE.Kdm6a.X.4850508.4850643.4849883.4850039.4851179.4851399	0.0269196	0.878,0.638,0.579	1.0,1.0,0.597	-0.167
SE.Tex9.8.79105830.79105913.79103702.79103881.79107094.79107141	0.0390579	0.792,0.758,0.803	0.879,0.974,1.0	-0.167
SE.Pam.9.111176031.111176088.111167822.111167876.111176741.111177602	7.00768e-05	0.261,0.222,0.249	0.485,0.359,0.386	-0.166
SE.Txnl1.18.59069612.59069723.59059374.59059604.59070902.59070972	0.000856289	0.696,1.0,0.805	1.0,1.0,1.0	-0.166
SE.Pikfyve.9.71992718.71992817.71991270.71991366.71993736.71993834	0.0027061	0.842,0.895,0.767	1.0,1.0,1.0	-0.165
SE.Rbm26.15.89296794.89296866.89295925.89295997.89297167.89297299	0.00482565	0.085,0.0,0.05	0.165,0.135,0.329	-0.165
SE.Brat1.12.16020983.16021075.16020681.16020800.16022209.16022329	0.0102087	0.681,0.784,1.0	0.961,1.0,1.0	-0.165
SE.Rbm10.X.1764387.1764461.1762748.1762835.1766184.1766254	0.0200326	0.907,0.691,0.65	0.922,0.891,0.931	-0.165
SE.Cpsf1.7.117663395.117663537.117663159.117663312.117663609.117663694	0.041567	0.972,0.644,0.866	0.977,1.0,1.0	-0.165
SE.Mtrf1l.1.42481261.42481318.42479762.42479926.42482758.42482838	0.045863	0.941,0.673,0.792	1.0,0.902,1.0	-0.165
MXE.Zfp275.X.157465121.157465213.157471908.157472070.157464564.157464679.157474103.157474219	0.0487191	0.082,0.107,0.255	0.19,0.358,0.39	-0.165
A3SS.Eri3.5.136408388.136408575.136408499.136408575.136406129.136406442	0.0382423	0.112,0.297,0.159	0.366,0.307,0.389	-0.165
SE.Fam45a.1.282194099.282194179.282190789.282191006.282197073.282197222	3.41371e-07	0.768,0.837,0.796	0.976,0.931,0.985	-0.164
SE.Dzip1.15.104170509.104170555.104170000.104170094.104170710.104170958	4.88832e-06	0.064,0.0,0.0	0.185,0.174,0.196	-0.164
SE.Synrg.10.71302799.71303033.71298085.71298197.71303914.71303992	0.000124761	0.841,0.883,0.783	1.0,1.0,1.0	-0.164
A5SS.Rbm4.1.220048739.220048950.220048881.220048950.220047470.220047893	7.8805e-14	0.082,0.059,0.033	0.211,0.299,0.156	-0.164
A5SS.Foxred1.8.36410312.36410612.36410405.36410612.36409334.36409560	0.0139615	0.905,0.783,0.756	1.0,0.937,1.0	-0.164
SE.Map3k2.18.25007438.25007518.25006092.25006223.25008390.25008458	1.16436e-07	0.946,0.757,0.807	1.0,1.0,1.0	-0.163
SE.Nsfl1c.3.146990160.146990280.146988560.146988635.146990924.146991090	8.00547e-05	0.0,0.0,0.067	0.3,0.126,0.131	-0.163
SE.Cspp1.5.8834714.8834792.8833566.8833665.8838992.8839016	0.00448518	0.583,1.0,0.879	1.0,0.951,1.0	-0.163
SE.Ppm1k.4.88695587.88695751.88694582.88694793.88703407.88703925	0.0377962	0.178,0.241,0.172	0.43,0.29,0.361	-0.163
MXE.Jmjd1c.20.22771888.22772112.22777111.22777264.22771350.22771478.22778203.22778418	6.4942e-06	0.871,0.704,0.765	0.945,0.922,0.963	-0.163
SE.Tom1l2.10.46605408.46605468.46603467.46603504.46613744.46613820	1.23297e-06	0.834,0.828,0.853	1.0,1.0,1.0	-0.162
SE.Myo5a.8.82120628.82120709.82118222.82118323.82122154.82122353	0.000387307	0.924,0.788,0.743	1.0,0.967,0.973	-0.162
SE.Phldb2.11.57457745.57457796.57454353.57454443.57460540.57460681	0.000617673	0.163,0.097,0.106	0.355,0.271,0.227	-0.162
SE.Rab30.1.157649624.157649692.157646234.157646335.157654748.157654932	0.0371576	0.723,0.816,0.918	0.944,1.0,1.0	-0.162
A3SS.Tab2.1.2004232.2005397.2004232.2004313.2005600.2005761	0.034582	0.784,1.0,0.731	1.0,1.0,1.0	-0.162
SE.Prpf40a.3.38703244.38703298.38701908.38701933.38703542.38703663	0	0.798,0.84,0.84	0.993,0.99,0.977	-0.161
SE.Col8a1.11.44999738.44999780.44953149.44953268.45000515.45000846	1.82924e-07	0.051,0.119,0.127	0.253,0.245,0.281	-0.161
MXE.Cdk8.12.10530685.10530796.10534358.10534434.10527307.10527448.10561193.10561340	0.000156091	0.12,0.117,0.237	0.316,0.349,0.291	-0.161
A3SS.Acbd5.17.89895684.89895887.89895684.89895884.89900183.89900402	0.00603853	0.0,0.024,0.069	0.171,0.118,0.288	-0.161
SE.Aplp2.8.32316853.32317021.32314093.32314224.32317995.32318216	1.53481e-11	0.635,0.628,0.691	0.827,0.82,0.786	-0.16
SE.Ppp1r12a.7.51431355.51431446.51425329.51425420.51431813.51431966	2.83752e-08	0.803,0.727,0.81	0.953,0.926,0.94	-0.16
SE.Wwp2.19.39606171.39606248.39603119.39603174.39606762.39606891	8.04849e-06	0.897,0.847,0.775	1.0,1.0,1.0	-0.16
SE.P4ha1.20.28953359.28953430.28952378.28952449.28962368.28962468	0.000300117	0.455,0.37,0.487	0.563,0.634,0.596	-0.16
SE.Smarca2.1.244765375.244765429.244757629.244757847.244776013.244776119	0.00360458	0.4,0.349,0.425	0.573,0.616,0.466	-0.16
MXE.Cobl.14.92453021.92453195.92474658.92474733.92417429.92417568.92478901.92478999	0.01319	0.194,0.125,0.127	0.355,0.309,0.261	-0.16
A3SS.Meis3.1.78075681.78075857.78075708.78075857.78075462.78075574	0.00539196	0.044,0.101,0.0	0.202,0.236,0.188	-0.16
SE.Dvl1.5.173304201.173304354.173304014.173304082.173304830.173304962	1.11729e-07	0.824,0.762,0.869	0.988,0.974,0.969	-0.159
SE.Akap17a.12.18529849.18530726.18529371.18529520.18531081.18531161	0.000183551	0.758,1.0,0.765	1.0,1.0,1.0	-0.159
MXE.Man2c1.8.61814144.61814242.61814392.61814487.61813933.61813940.61814721.61814826	0.0495696	0.316,0.443,0.389	0.54,0.49,0.596	-0.159
A3SS.Rbfox2.7.118172110.118172255.118172110.118172243.118173409.118173502	0.0343979	0.354,0.239,0.31	0.431,0.522,0.426	-0.159
RI.Bcl2l11.3.120729552.120729947.120729552.120729689.120729857.120729947	0.00460795	0.881,0.667,0.899	0.924,1.0,1.0	-0.159
SE.Tnfrsf12a.10.12996960.12997120.12996595.12996730.12997807.12997930	0	0.821,0.836,0.854	1.0,0.995,0.99	-0.158
SE.Srpk2.4.8162145.8162295.8148912.8149019.8163383.8163409	2.27067e-05	0.761,0.952,0.812	1.0,1.0,1.0	-0.158
SE.Pam.9.111176034.111176088.111167822.111167876.111176741.111177602	0.00032059	0.268,0.246,0.271	0.495,0.368,0.397	-0.158
SE.Dgka.7.3157661.3157832.3157409.3157529.3159056.3159171	0.00320555	0.637,1.0,0.842	0.952,1.0,1.0	-0.158
SE.Btbd19.5.135991213.135991273.135990256.135990325.135992966.135993020	0.00461332	0.633,1.0,0.841	0.949,1.0,1.0	-0.158
SE.Bbx.11.53214533.53214623.53202218.53202367.53215933.53215993	0.012641	0.637,0.698,0.696	0.811,0.849,0.845	-0.158
SE.Cdc14b.17.1711425.1711491.1709702.1711137.1719574.1719721	0.0309145	0.07,0.0,0.063	0.375,0.146,0.085	-0.158
SE.Rhot1.10.67539764.67539927.67536053.67536197.67546875.67546950	0.0389562	0.694,0.914,0.878	1.0,0.96,1.0	-0.158
MXE.Zfp106.3.112305314.112305562.112317773.112317835.112301614.112302230.112320708.112320762	0.000285516	0.367,0.448,0.365	0.523,0.594,0.536	-0.158
SE.Tnfrsf12a.10.12996960.12997113.12996595.12996730.12997807.12997930	0	0.824,0.834,0.855	1.0,0.995,0.99	-0.157
SE.Wdr70.2.56962860.56962961.56961071.56961151.56994271.56994356	7.66559e-05	0.83,0.753,0.945	1.0,1.0,1.0	-0.157
SE.Golga2.3.11325951.11326047.11321153.11321276.11326293.11326337	0.0170883	0.591,0.549,0.639	0.782,0.717,0.751	-0.157
A5SS.Snrnp48.17.27248854.27249071.27248912.27249071.27243780.27243975	0.0026972	0.046,0.0,0.077	0.145,0.24,0.21	-0.157
A3SS.Acta2.1.252549965.252550205.252549965.252550065.252550360.252550394	1.40108e-07	0.928,0.871,0.7	0.97,1.0,1.0	-0.157
A3SS.Anapc5.12.39228026.39228184.39228041.39228184.39226462.39226552	0.00380528	0.256,0.282,0.15	0.39,0.447,0.321	-0.157
SE.Snx5.3.138384454.138384550.138382890.138382996.138386747.138386869	3.4818e-07	0.927,0.933,0.673	1.0,1.0,1.0	-0.156
MXE.Pbrm1.16.7107280.7107420.7107628.7107752.7103997.7104136.7109242.7109395	1.90106e-07	0.811,0.785,0.769	0.937,0.965,0.93	-0.156
SE.Flna.X.156483810.156483934.156483479.156483617.156484475.156484608	3.79549e-09	0.869,0.793,0.785	0.972,1.0,0.941	-0.155
SE.Ubac1.3.3460500.3460639.3453400.3453921.3461484.3461571	4.97346e-05	0.716,0.921,0.851	0.981,0.972,1.0	-0.155
SE.Mrps18b.20.3348548.3348615.3346556.3346625.3349737.3349797	0.000748127	0.804,0.888,0.71	0.975,0.956,0.936	-0.155
SE.Alkbh3.3.82897144.82897233.82891675.82891885.82898679.82898783	0.00131422	0.776,0.757,0.725	0.886,0.885,0.951	-0.155
SE.Rap1gap2.10.61233517.61233562.61232671.61232704.61236910.61236946	0.00394624	0.767,0.749,0.846	1.0,0.927,0.899	-0.155
MXE.Sbno2.7.12504563.12504647.12504869.12505053.12501641.12501803.12505139.12505294	3.41352e-05	0.788,0.796,0.779	0.958,0.918,0.953	-0.155
MXE.Acer3.1.163208404.163208486.163209952.163210005.163203869.163203905.163212172.163212225	0.0133795	0.318,0.282,0.297	0.445,0.402,0.516	-0.155
A5SS.Zfand1.2.93656945.93657000.93656945.93656978.93659483.93659526	0.0372194	0.711,1.0,0.823	1.0,1.0,1.0	-0.155
SE.Flnc.4.56730003.56730102.56729229.56729477.56730404.56730504	1.79297e-11	0.92,0.832,0.742	0.974,0.982,1.0	-0.154
SE.Brox.13.101693192.101693289.101689970.101690066.101695705.101695822	1.77208e-05	0.759,0.815,0.892	0.971,0.981,0.977	-0.154
SE.Zmym5.15.37048148.37048292.37047261.37047468.37049845.37050131	0.000104997	0.843,0.851,0.843	1.0,1.0,1.0	-0.154
SE.Rif1.3.37642159.37642306.37638074.37638971.37642581.37642659	0.00825027	1.0,0.668,0.84	1.0,0.97,1.0	-0.154
SE.Meis1.14.103185567.103185662.103181280.103183392.103185959.103186049	0.0115548	0.714,0.598,0.65	0.794,0.803,0.828	-0.154
A5SS.Fuz.1.100892990.100893074.100892990.100893059.100893259.100893364	0.00296124	0.04,0.0,0.104	0.266,0.213,0.126	-0.154
A3SS.Zc3h14.6.122765268.122765467.122765271.122765467.122763493.122763614	1.86327e-08	0.844,0.901,0.769	1.0,0.992,0.985	-0.154
SE.LOC100361543.1.166995844.166995947.166995431.166995509.166996425.166997045	4.08467e-07	0.842,0.785,0.807	0.974,0.961,0.958	-0.153
SE.Akip1.1.174331973.174332054.174330910.174331101.174334262.174334376	6.88541e-06	0.87,0.718,0.844	0.955,0.966,0.971	-0.153
SE.Fus.1.199419319.199419354.199417520.199417737.199420799.199420832	0.000643156	0.816,0.838,0.816	1.0,0.93,1.0	-0.153
SE.LOC501110.9.27493544.27493677.27488851.27488993.27494714.27494766	0.00071312	0.771,0.841,0.829	0.9,1.0,1.0	-0.153
SE.Sdhaf2.1.226566677.226566744.226547530.226548970.226572263.226572349	0.00130876	0.82,0.768,0.846	0.969,0.923,1.0	-0.153
SE.Plaur.1.81338958.81339111.81332303.81332447.81339626.81339761	0.00566943	0.629,0.879,0.957	0.984,0.958,0.981	-0.153
SE.Plekha1.1.201477110.201477186.201475855.201475948.201478401.201478813	0.0150605	0.683,1.0,0.859	1.0,1.0,1.0	-0.153
A5SS.Fibp.1.220842593.220842748.220842593.220842727.220843041.220843150	0.0242132	0.272,0.263,0.13	0.401,0.379,0.343	-0.153
SE.App.11.24440976.24441030.24435334.24435435.24447168.24447390	2.02899e-08	0.376,0.381,0.369	0.542,0.524,0.516	-0.152
SE.Fam184a.20.34995030.34995212.34991201.34991399.34997362.34997498	0.000331127	0.956,0.699,0.89	1.0,1.0,1.0	-0.152
SE.Abcb6.9.82377568.82377678.82377202.82377268.82378244.82378366	0.00617006	0.909,0.763,0.872	1.0,1.0,1.0	-0.152
MXE.Col5a1.3.6568350.6568463.6570755.6570824.6567392.6567648.6574346.6574580	2.12394e-09	0.568,0.544,0.608	0.742,0.73,0.703	-0.152
MXE.Slc9a8.3.164202712.164202856.164205504.164205604.164198650.164198685.164205713.164205852	7.73079e-06	0.94,0.772,0.831	1.0,1.0,1.0	-0.152
SE.Esyt2.6.144230828.144230948.144225531.144225627.144233200.144233245	0.000591523	0.89,0.863,0.728	1.0,0.933,1.0	-0.151
SE.Cfap100.4.122329512.122329590.122327967.122328068.122337291.122337389	0.00071448	0.789,0.865,0.842	0.975,0.975,1.0	-0.151
SE.Jmjd1c.20.22793011.22793103.22792724.22792917.22796062.22796168	0.0156602	0.84,0.848,0.71	0.851,1.0,1.0	-0.151
MXE.Ankrd17.14.19376168.19376271.19377676.19378504.19375783.19375927.19382792.19382941	0.0204152	0.527,0.394,0.569	0.681,0.631,0.631	-0.151
SE.Dmpk.1.79998080.79998170.79997731.79997778.79998490.79999364	7.44437e-08	0.876,0.731,0.83	0.982,0.991,0.914	-0.15
SE.Ptdss2.1.214135501.214135584.214128208.214128310.214139498.214139566	0.000152965	0.813,0.777,0.828	0.906,0.962,1.0	-0.15
SE.Bmp1.15.52178048.52178269.52177484.52177610.52181119.52181300	0.00125908	0.175,0.233,0.215	0.378,0.42,0.274	-0.15
SE.Cenpv.10.48848798.48848913.48846727.48846852.48855734.48855804	0.00367248	0.727,0.816,0.825	0.867,1.0,0.952	-0.15
SE.Jmjd1c.20.22793011.22793076.22792724.22792917.22796062.22796168	0.0371939	0.857,0.85,0.683	0.841,1.0,1.0	-0.15
SE.Eif4a2.11.81374532.81374661.81373047.81373826.81375112.81375192	0	0.049,0.043,0.078	0.182,0.259,0.175	-0.149
SE.Cacna1c.4.150718579.150718639.150714554.150714661.150719765.150719895	7.32812e-05	0.816,0.789,0.948	1.0,1.0,1.0	-0.149
SE.Nsfl1c.3.146990178.146990280.146988560.146988635.146990924.146991090	3.02636e-06	0.0,0.0,0.0	0.307,0.136,0.0	-0.148
SE.Eri3.5.136408906.136409014.136408499.136408575.136420697.136420969	0.000555992	0.037,0.0,0.019	0.193,0.308,0.0	-0.148
SE.Ccser2.16.14105298.14105482.14095057.14095320.14111118.14111208	0.0107016	0.145,0.178,0.172	0.324,0.333,0.282	-0.148
SE.Abcg3l1.14.6531141.6531201.6522165.6522317.6533321.6533524	0.0122865	0.678,0.877,1.0	1.0,1.0,1.0	-0.148
SE.Rnd1.7.140355305.140355393.140352587.140352697.140355997.140356209	0.0290793	0.726,0.884,0.888	1.0,0.943,1.0	-0.148
SE.Ripk1.17.31552583.31552660.31545903.31545994.31556999.31557149	5.8726e-07	0.738,0.921,0.899	1.0,1.0,1.0	-0.147
SE.Ubap1.5.57776387.57776570.57769351.57770275.57777276.57777378	1.41849e-05	0.897,0.74,0.829	0.96,0.968,0.979	-0.147
SE.Tars2.2.197870130.197870348.197868955.197869118.197870684.197870783	0.000359942	0.887,0.83,0.797	0.956,1.0,1.0	-0.147
SE.Pfkfb3.17.70695461.70695524.70692881.70692978.70696042.70696117	0.000738724	0.94,0.673,0.947	1.0,1.0,1.0	-0.147
SE.Sun1.12.17506361.17506472.17503896.17503995.17506761.17506827	0.00161887	0.788,0.7,0.74	0.907,0.876,0.887	-0.147
SE.Faxdc2.10.43509011.43509133.43505489.43505695.43512008.43512129	0.0111917	0.916,0.704,0.785	0.896,0.949,1.0	-0.147
MXE.Wisp2.3.160208395.160208502.160211891.160212108.160207912.160208200.160215416.160215671	0	0.117,0.057,0.11	0.198,0.27,0.257	-0.147
MXE.Rbl2.19.17318079.17318260.17319028.17319193.17314861.17315128.17320279.17320417	0.00191118	0.767,0.844,0.764	0.984,0.888,0.943	-0.147
A3SS.Guk1.10.45536970.45537105.45536970.45536991.45538165.45538207	2.18157e-06	0.765,0.857,0.795	0.943,0.968,0.947	-0.147
SE.Prpf38b.2.211709349.211709420.211708543.211708767.211711121.211711182	3.54711e-10	0.0,0.0,0.01	0.147,0.134,0.168	-0.146
SE.Apip.3.92989868.92989917.92986426.92986527.92991340.92991458	0.000831079	0.754,1.0,0.807	1.0,1.0,1.0	-0.146
SE.Mthfs.8.96568810.96569072.96564876.96564999.96611981.96614348	0.00686936	0.956,0.774,0.727	0.952,0.942,1.0	-0.146
SE.Sepsecs.14.60666869.60666972.60663280.60663434.60671278.60671408	0.0164635	0.864,0.741,0.849	0.958,0.934,1.0	-0.146
SE.Bmp1.15.52178048.52178269.52177484.52177610.52179580.52179700	0.0174279	0.904,0.889,0.77	1.0,1.0,1.0	-0.146
A3SS.Acta2.1.252549965.252550213.252549965.252550065.252550360.252550394	1.17331e-07	0.929,0.88,0.723	0.971,1.0,1.0	-0.146
A3SS.Usp13.2.119232999.119233060.119233002.119233060.119224122.119224248	0.0119696	0.823,0.914,0.761	1.0,0.937,1.0	-0.146
SE.Immt.4.99769223.99769313.99768230.99768339.99773138.99773275	1.14253e-05	0.712,0.801,0.852	0.944,0.927,0.929	-0.145
SE.Gle1.3.8519297.8519534.8518443.8518573.8519943.8520048	1.18195e-05	0.034,0.025,0.084	0.156,0.232,0.191	-0.145
SE.Trmt11.1.29443211.29443293.29440763.29440837.29443381.29443474	7.83121e-05	0.793,0.831,0.897	1.0,1.0,0.955	-0.145
SE.Cd2ap.9.20834862.20834954.20833564.20833601.20838964.20839130	0.000942104	0.82,0.722,0.951	1.0,0.98,0.949	-0.145
SE.Dpy30.6.22311297.22311433.22302521.22302569.22316546.22316894	0.000960103	0.754,0.672,0.836	0.913,0.874,0.91	-0.145
SE.Irf3.1.100994627.100994765.100993235.100993434.100994856.100994930	0.00188473	0.791,0.678,0.816	0.923,0.922,0.875	-0.145
MXE.Ints6.15.45872078.45872189.45873699.45873794.45869398.45869525.45875022.45875155	0.0028377	0.786,0.774,0.742	0.947,0.842,0.948	-0.145
MXE.Sun1.12.17503896.17503995.17506361.17506472.17503464.17503558.17506761.17506827	0.00428716	0.445,0.467,0.415	0.586,0.563,0.614	-0.145
RI.Cep85.5.152367262.152368145.152367262.152367313.152368051.152368145	0.00859577	0.128,0.248,0.299	0.349,0.365,0.396	-0.145
SE.Anxa4.4.118578752.118578818.118566474.118566521.118595533.118595580	2.29114e-13	0.091,0.074,0.08	0.219,0.231,0.228	-0.144
SE.Dlg3.X.70641172.70641214.70637578.70637678.70642413.70642464	2.12124e-06	0.85,0.833,0.859	0.974,1.0,1.0	-0.144
SE.Tcerg1.18.36867337.36867388.36866249.36866316.36868675.36868811	0.000403124	0.09,0.021,0.013	0.112,0.241,0.204	-0.144
SE.Ankzf1.9.82397683.82397839.82397312.82397541.82398833.82399314	0.000535151	0.694,0.901,0.921	0.97,0.978,1.0	-0.144
SE.Plekha1.1.201477145.201477216.201475855.201475948.201478401.201480877	0.00401609	0.816,1.0,0.752	1.0,1.0,1.0	-0.144
SE.Lman2l.9.43017908.43018026.43004337.43004499.43021306.43021425	0.00669514	0.711,1.0,0.753	1.0,1.0,0.897	-0.144
SE.Bcs1l.9.81870737.81870801.81870331.81870526.81871013.81871183	0.00726562	0.785,1.0,0.721	1.0,1.0,0.936	-0.143
SE.Pnpo.10.84878144.84878244.84877149.84877203.84879578.84879703	0.00765615	0.817,0.955,0.799	1.0,1.0,1.0	-0.143
MXE.Wisp2.3.160208389.160208502.160211891.160212108.160207912.160208200.160215416.160215671	0	0.112,0.056,0.114	0.196,0.264,0.25	-0.143
MXE.Phkb.19.22064320.22064411.22065518.22065609.22061456.22061659.22066896.22066954	3.42967e-06	0.011,0.039,0.038	0.242,0.185,0.091	-0.143
SE.Rbm5.8.116518730.116518812.116517188.116517254.116519576.116519660	6.43639e-06	0.74,0.845,0.965	0.977,1.0,1.0	-0.142
SE.Dmd.X.53466216.53466375.53456986.53457123.53492162.53492406	0.0101665	0.798,0.729,0.681	0.975,0.874,0.786	-0.142
SE.Ap4m1.12.19314688.19314824.19314408.19314497.19314992.19315099	0.0160873	0.098,0.0,0.0	0.126,0.211,0.187	-0.142
SE.Ccdc191.11.61728239.61728393.61714882.61715073.61732512.61732736	0.0217343	0.904,0.6,0.788	1.0,1.0,0.718	-0.142
SE.Trip11.6.125792424.125792486.125791267.125791354.125795455.125795665	0.0231111	1.0,0.762,0.811	1.0,1.0,1.0	-0.142
SE.Fam160a2.1.170223267.170223347.170222874.170223080.170226073.170226241	0.0356866	0.871,0.699,0.923	0.952,0.968,1.0	-0.142
MXE.Slc25a36.8.104973727.104973830.104976193.104976302.104970035.104970220.104977289.104977390	0.00828974	0.0,0.0,0.07	0.146,0.104,0.245	-0.142
A3SS.Cap1.5.140571860.140572003.140571860.140571985.140585302.140585408	0.000222615	0.017,0.028,0.0	0.095,0.189,0.188	-0.142
SE.Rabggtb.2.260112916.260113132.260111256.260111406.260113857.260113963	4.13161e-05	0.891,0.834,0.852	1.0,1.0,1.0	-0.141
SE.Zfp638.4.115674784.115674977.115670901.115670939.115682512.115682611	0.0168705	0.772,1.0,0.761	1.0,0.956,1.0	-0.141
SE.Zfp563.7.15422783.15422844.15422478.15422605.15424646.15425802	0.0263186	0.955,0.92,0.703	1.0,1.0,1.0	-0.141
MXE.Tjp1.1.126149935.126150079.126151317.126151535.126147385.126147984.126153123.126153598	0.00240879	0.54,0.471,0.486	0.651,0.646,0.623	-0.141
MXE.Sltm.8.76991894.76991959.76994591.76994789.76978913.76979001.76995576.76995624	0.0198209	0.3,0.274,0.368	0.488,0.416,0.462	-0.141
SE.Akap9.4.27306773.27306827.27306270.27306441.27309429.27309474	4.38637e-07	0.809,0.972,0.785	0.985,1.0,1.0	-0.14
SE.Wsb1.10.66591501.66591665.66590031.66590204.66592523.66592624	0.0156469	0.217,0.201,0.284	0.438,0.404,0.279	-0.14
SE.Kmt2e.4.8207876.8208072.8206314.8206579.8208842.8208952	0.0269748	0.126,0.142,0.124	0.318,0.242,0.251	-0.14
MXE.Sp140.9.92641554.92641656.92644772.92644838.92636850.92636931.92647069.92647147	0.0424087	0.501,0.392,0.364	0.55,0.597,0.529	-0.14
SE.Srpk2.4.8162138.8162295.8148912.8149019.8163383.8163409	6.71591e-05	0.79,0.955,0.838	1.0,1.0,1.0	-0.139
SE.Mrrf.3.15475320.15475476.15468742.15468954.15479852.15479971	0.0117536	0.938,0.766,0.766	0.954,0.96,0.972	-0.139
SE.Evi5l.12.2593377.2593593.2592808.2592937.2601289.2601350	0.0232732	0.956,0.806,0.82	1.0,1.0,1.0	-0.139
SE.Wsb1.10.66591489.66591665.66590031.66590204.66592523.66592624	0.028178	0.217,0.236,0.327	0.458,0.437,0.303	-0.139
SE.Ap4b1.2.206296193.206296418.206293719.206294232.206296877.206297008	0.0313363	0.96,0.811,0.813	1.0,1.0,1.0	-0.139
MXE.Wisp2.3.160208378.160208502.160211891.160212108.160207912.160208200.160215416.160215671	0	0.107,0.055,0.112	0.19,0.258,0.244	-0.139
MXE.Eif4a2.11.81375112.81375192.81375416.81375506.81373047.81373826.81375743.81375881	1.85279e-06	0.544,0.552,0.545	0.665,0.738,0.654	-0.139
A5SS.Rps24.16.760364.760601.760364.760382.761662.761682	0	0.003,0.003,0.003	0.239,0.137,0.051	-0.139
A5SS.Sparc.10.40757112.40757353.40757262.40757353.40754605.40754675	0.00111317	0.812,0.71,0.913	1.0,1.0,0.852	-0.139
SE.Lcor.1.260801077.260801171.260798188.260798476.260803931.260807926	0.000215706	0.865,0.755,0.966	1.0,1.0,1.0	-0.138
SE.Ezh2.4.77295620.77295790.77295142.77295237.77296803.77297044	0.0016436	0.705,1.0,0.832	0.99,1.0,0.961	-0.138
SE.Ttc3.11.34639757.34640001.34638529.34638656.34643702.34643763	0.00234467	1.0,0.912,0.629	1.0,1.0,0.955	-0.138
SE.Ddit3.7.70582844.70582892.70580197.70580349.70584057.70584215	0.00301938	0.549,0.677,0.565	0.736,0.77,0.7	-0.138
SE.Nsmaf.5.19508334.19508462.19501356.19501507.19510162.19510269	0.0067232	0.871,0.95,0.764	1.0,1.0,1.0	-0.138
SE.Tab2.1.2023010.2023074.2017386.2017574.2073762.2073811	0.0167174	0.052,0.0,0.085	0.168,0.149,0.233	-0.138
MXE.Sclt1.2.128626365.128626488.128636506.128636642.128624605.128624671.128642779.128642835	0.000973491	0.191,0.151,0.184	0.351,0.296,0.292	-0.138
A3SS.Guk1.10.45536970.45537109.45536970.45536991.45538165.45538207	3.7028e-06	0.775,0.86,0.812	0.945,0.968,0.949	-0.138
SE.Flna.X.156477713.156477737.156477365.156477555.156479959.156480207	0	0.116,0.127,0.125	0.286,0.264,0.228	-0.137
SE.Usp16.11.27118414.27118493.27117286.27117372.27120055.27120147	3.58636e-06	0.849,0.889,0.79	0.948,0.992,1.0	-0.137
SE.Cdc26.5.78264155.78264263.78262674.78262783.78266995.78267063	9.59589e-05	0.717,0.959,0.889	1.0,0.977,1.0	-0.137
SE.Pkd1.10.13953436.13953550.13952710.13952837.13953657.13953707	0.00226809	0.363,0.347,0.302	0.449,0.472,0.502	-0.137
SE.Atg101.7.142932401.142932510.142929438.142929668.142932630.142932944	0.0167334	0.153,0.206,0.096	0.278,0.263,0.322	-0.136
SE.Lypla1.5.14565684.14565786.14564596.14564773.14568232.14568306	0	0.87,0.836,0.818	0.985,0.976,0.968	-0.135
SE.Orc4.3.33069258.33069332.33065365.33065432.33075583.33075685	6.89671e-12	0.0,0.0,0.0	0.156,0.079,0.17	-0.135
SE.Ankrd10.16.83221187.83221297.83213152.83213244.83222214.83222450	1.31715e-07	0.021,0.034,0.056	0.161,0.224,0.13	-0.135
SE.Cldnd1.11.43991375.43991426.43990844.43991154.43992511.43992598	1.71043e-07	0.012,0.031,0.006	0.144,0.111,0.198	-0.135
SE.Pms1.9.53122368.53122544.53120655.53120733.53129624.53129762	3.06298e-06	0.025,0.0,0.0	0.172,0.197,0.061	-0.135
SE.E2f5.2.88354476.88354541.88353339.88353607.88356106.88356150	0.00571056	0.899,1.0,0.695	1.0,1.0,1.0	-0.135
SE.Parp2.15.27747937.27748020.27747532.27747667.27748170.27748270	0.025497	0.765,0.92,0.69	0.932,0.975,0.872	-0.135
SE.Rapgef6.10.40015132.40015156.40011877.40012001.40019675.40019896	0.0338464	0.0,0.126,0.0	0.274,0.146,0.11	-0.135
A3SS.Usp19.8.117284809.117285030.117284815.117285030.117284585.117284701	0.0382423	0.617,0.707,0.661	0.797,0.84,0.752	-0.135
SE.Xpnpep1.1.273720690.273720741.273719599.273719658.273722961.273723172	1.28995e-07	0.85,0.908,0.816	0.975,1.0,1.0	-0.134
SE.Arfip1.2.183535786.183535818.183534320.183534433.183542106.183542215	1.20406e-05	0.063,0.0,0.0	0.254,0.107,0.103	-0.134
SE.Usp47.1.176910674.176910734.176908293.176908461.176913011.176913143	5.76089e-05	0.143,0.235,0.151	0.355,0.297,0.28	-0.134
SE.Zfp266.8.21518713.21518794.21517570.21517650.21521870.21522042	8.19241e-05	0.815,0.855,0.835	1.0,0.908,1.0	-0.134
SE.Txnl1.18.59069612.59069726.59059374.59059604.59070902.59070972	0.00317579	0.761,1.0,0.836	1.0,1.0,1.0	-0.134
SE.Ell.16.20601043.20601122.20600256.20600737.20602298.20602423	0.00756752	0.901,1.0,0.696	1.0,1.0,1.0	-0.134
SE.Camk2d.2.231063264.231063299.231059945.231059988.231078899.231078948	0.0123527	0.747,0.795,1.0	1.0,0.943,1.0	-0.134
SE.Alkbh3.3.82900458.82900503.82898679.82898783.82902768.82902803	0.0441439	0.914,0.62,0.963	1.0,0.899,1.0	-0.134
A3SS.Psmd11.10.67854551.67855090.67855054.67855090.67846850.67846913	0.00511226	0.965,0.944,0.69	1.0,1.0,1.0	-0.134
SE.Eif4a2.11.81374536.81374661.81373047.81373826.81375112.81375192	0	0.028,0.033,0.05	0.142,0.207,0.16	-0.133
SE.Ergic2.4.182583690.182583792.182578347.182578403.182587129.182587170	5.92325e-06	0.912,0.761,0.873	1.0,0.968,0.978	-0.133
SE.Cluap1.10.11874498.11874610.11871511.11871691.11877420.11877584	0.00102484	0.809,0.894,0.899	1.0,1.0,1.0	-0.133
SE.Dpy30.6.22311292.22311433.22302521.22302569.22316546.22316894	0.00168924	0.768,0.693,0.85	0.92,0.877,0.912	-0.133
SE.Ppat.14.33606179.33606252.33604586.33604732.33607847.33607999	0.00208689	0.91,0.724,0.968	1.0,1.0,1.0	-0.133
SE.Acot13.17.42251037.42251222.42241158.42241453.42253366.42253649	0.00730491	0.954,0.919,0.69	1.0,0.962,1.0	-0.133
SE.Zcchc17.5.148566519.148566577.148555926.148556027.148577207.148577292	0.0176662	0.752,0.912,0.9	1.0,0.963,1.0	-0.133
SE.Ppm1k.4.88700180.88700298.88694582.88694793.88703407.88703925	0.0183457	0.051,0.092,0.033	0.313,0.102,0.16	-0.133
SE.Ugdh.14.44495288.44495383.44492798.44492946.44496990.44497121	1.4626e-09	0.851,0.806,0.929	0.992,0.997,0.992	-0.132
SE.Sec23ip.1.200189471.200189590.200188076.200188285.200190057.200190210	3.13034e-06	0.82,0.839,0.945	1.0,1.0,1.0	-0.132
SE.Rpp14.15.18629142.18629219.18628292.18628371.18632223.18632308	0.000938985	0.806,0.857,0.822	0.936,0.971,0.975	-0.132
SE.Elp5.10.56584999.56585220.56581949.56582131.56589850.56589931	0.00736692	0.71,0.789,0.809	0.854,0.91,0.94	-0.132
SE.Hyi.5.137191593.137191663.137191017.137191132.137191748.137191883	0.0093209	0.837,0.905,0.862	1.0,1.0,1.0	-0.132
SE.Pi4kb.2.196143478.196143670.196139754.196140092.196148405.196149342	0.00976612	0.074,0.07,0.093	0.149,0.295,0.19	-0.132
A3SS.Gatad2a.16.21259413.21259581.21259416.21259581.21259178.21259310	0.0439547	0.021,0.0,0.171	0.171,0.202,0.214	-0.132
SE.Mgea5.1.265519214.265519300.265518156.265518261.265522485.265522660	7.81614e-14	0.901,0.839,0.821	0.988,1.0,0.967	-0.131
SE.Fyn.20.44521277.44521347.44460734.44460774.44577311.44577569	0.000688498	1.0,0.779,0.827	1.0,1.0,1.0	-0.131
SE.Mtmr10.1.125145602.125145693.125138172.125138315.125151281.125151462	0.000938612	0.703,0.904,1.0	1.0,1.0,1.0	-0.131
MXE.Nmt2.17.78937408.78937553.78940115.78940165.78933726.78933845.78941710.78941753	6.26356e-08	0.05,0.0,0.049	0.135,0.141,0.217	-0.131
MXE.Jmjd1c.20.22759934.22760109.22764462.22764593.22758550.22758727.22765349.22765440	0.0042545	0.616,0.671,0.612	0.817,0.747,0.727	-0.131
SE.Smarca2.1.244755643.244755739.244727998.244728217.244757629.244757847	8.45465e-13	0.03,0.025,0.044	0.237,0.15,0.102	-0.13
SE.Grb10.14.92063673.92063875.92060549.92060775.92076949.92077088	0.00178717	0.333,0.36,0.327	0.47,0.479,0.461	-0.13
SE.Mtrr.1.37769300.37769487.37757338.37757381.37770889.37770982	0.0158478	0.722,0.917,0.933	1.0,0.962,1.0	-0.13
SE.Adgrl2.2.258798045.258798127.258794097.258794932.258800034.258800131	0.0211642	0.135,0.146,0.172	0.255,0.243,0.346	-0.13
SE.Abcc1.10.581098.581147.578445.578622.583445.583521	0.0297134	0.926,0.686,0.884	0.947,0.979,0.961	-0.13
SE.Helz.10.95775365.95775422.95770153.95770209.95794682.95794910	0.0473375	1.0,0.666,0.914	1.0,0.971,1.0	-0.13
MXE.Wisp2.3.160208357.160208502.160211891.160212108.160207912.160208200.160215416.160215671	1.0506e-12	0.107,0.064,0.137	0.19,0.261,0.248	-0.13
MXE.Acta2.1.252547558.252547611.252550033.252550205.252546868.252546997.252550360.252550394	0.000896565	0.802,0.792,0.743	0.875,0.925,0.928	-0.13
MXE.Rev1.9.44746902.44747055.44754558.44754742.44743480.44744184.44760116.44760243	0.00244792	0.156,0.233,0.244	0.392,0.29,0.342	-0.13
A3SS.RGD1565536.3.110554785.110555012.110554785.110554938.110555419.110555527	0.000462705	0.098,0.048,0.143	0.217,0.217,0.246	-0.13
A3SS.Tank.3.47488347.47488459.47488350.47488459.47474983.47475131	0.0261379	0.095,0.122,0.053	0.254,0.202,0.203	-0.13
A3SS.Snapin.2.189880293.189880360.189880293.189880340.189880574.189880743	0.0313355	0.068,0.15,0.089	0.174,0.206,0.317	-0.13
SE.Atrx.X.76908489.76908603.76904245.76904355.76911995.76912120	3.77906e-05	0.846,0.952,0.779	1.0,1.0,0.965	-0.129
SE.Fam76a.5.151104346.151104433.151095757.151095893.151107165.151107323	3.78663e-05	0.881,0.812,0.849	0.971,1.0,0.957	-0.129
SE.Pigf.6.10585738.10585875.10577650.10577759.10588623.10588740	4.68475e-05	0.114,0.038,0.0	0.224,0.221,0.095	-0.129
SE.Gls2.7.2617019.2617196.2616818.2616869.2619164.2619296	0.000239515	0.854,0.754,0.927	0.964,1.0,0.959	-0.129
SE.Clk4.10.36724125.36724184.36720699.36720860.36725382.36725605	0.000491815	0.029,0.022,0.0	0.071,0.32,0.046	-0.129
SE.Rbm26.15.89295925.89295997.89288542.89288668.89297167.89297290	0.00374528	0.857,0.886,0.752	0.934,0.949,1.0	-0.129
SE.Tax1bp1.4.82812303.82812407.82808147.82808288.82820390.82820565	0.00516383	0.83,0.952,0.785	1.0,0.953,1.0	-0.129
SE.Cspp1.5.8834714.8834795.8833566.8833665.8838992.8839016	0.00535715	0.671,1.0,0.901	1.0,0.958,1.0	-0.129
SE.Txndc11.10.4615527.4615640.4605017.4605111.4617695.4617896	0.014559	0.747,0.789,0.88	0.939,0.94,0.925	-0.129
MXE.Nasp.5.135455434.135456415.135459207.135459288.135450733.135450813.135463738.135463849	0.000168367	0.68,0.643,0.589	0.744,0.799,0.756	-0.129
MXE.Rab8b.8.72646740.72646830.72654498.72654559.72642614.72642665.72657166.72657227	0.0142551	0.859,0.834,0.832	0.975,0.938,1.0	-0.129
A5SS.Hmgb1.12.7085249.7085447.7085249.7085315.7085709.7085873	0.011045	0.047,0.023,0.053	0.092,0.203,0.214	-0.129
A5SS.Gramd1a.1.89570096.89570310.89570167.89570310.89568859.89568963	0.0197515	0.065,0.018,0.17	0.167,0.283,0.189	-0.129
A3SS.Bclaf1.1.15815685.15815876.15815819.15815876.15815279.15815385	0.00810414	0.929,0.718,0.965	1.0,1.0,1.0	-0.129
SE.Herc4.20.26784146.26784238.26782634.26782856.26787405.26787536	3.83646e-05	0.853,0.86,0.871	1.0,1.0,0.969	-0.128
SE.Map3k8.17.56119591.56119759.56113654.56114013.56120891.56121153	0.0014812	0.868,0.82,0.927	1.0,1.0,1.0	-0.128
SE.Wdr3.2.202451354.202451398.202449645.202449774.202451978.202452026	0.00487185	0.906,0.715,0.973	0.979,1.0,1.0	-0.128
MXE.Usp28.8.53327556.53327705.53329011.53329164.53322477.53322557.53329394.53329522	0.000632272	0.882,0.791,0.839	0.948,0.949,1.0	-0.128
MXE.Myl6.7.2906623.2906664.2906814.2906976.2906136.2906318.2907350.2907378	0.000904237	0.861,0.813,0.813	0.982,0.95,0.938	-0.128
MXE.Pcnx1.6.105676539.105676672.105681839.105681942.105664809.105666522.105694450.105694541	0.0177341	0.813,0.739,0.8	0.958,0.966,0.813	-0.128
SE.Ccnyl1.9.71416478.71416579.71410660.71410695.71419381.71419417	6.90158e-05	0.854,0.837,0.852	0.958,0.995,0.971	-0.127
SE.Tpp2.9.50725958.50725997.50724108.50724187.50730880.50731032	0.00208689	0.16,0.159,0.168	0.248,0.31,0.31	-0.127
SE.Lrch3.11.71034110.71034164.71030666.71030730.71035891.71035942	0.00212246	0.701,0.912,0.833	0.954,0.98,0.894	-0.127
SE.Rnf213.10.108541004.108541133.108538106.108538193.108544869.108545304	0.00427355	0.0,0.067,0.0	0.167,0.252,0.028	-0.127
MXE.Mrpl17.1.170652815.170653057.170653089.170653141.170652293.170652651.170653389.170653458	0.000109886	0.453,0.436,0.416	0.58,0.561,0.545	-0.127
SE.Slc7a5.19.54698774.54698871.54697759.54697909.54699203.54699307	8.59577e-06	0.898,0.814,0.909	1.0,1.0,1.0	-0.126
SE.Trmt11.1.29435085.29435315.29432173.29432245.29436595.29436655	0.00735594	0.061,0.022,0.032	0.218,0.116,0.158	-0.126
SE.Cwc25.10.85692208.85692272.85691570.85691761.85692931.85693059	0.0156532	1.0,0.758,0.863	1.0,1.0,1.0	-0.126
SE.Wdr60.6.144086223.144086386.144080897.144081011.144087325.144087498	0.0183457	0.904,0.848,0.87	1.0,1.0,1.0	-0.126
MXE.Mrpl17.1.170652830.170653057.170653089.170653141.170652293.170652651.170653389.170653458	0.000126055	0.443,0.427,0.413	0.57,0.555,0.537	-0.126
MXE.Myl6.7.2906623.2906664.2906814.2906957.2906136.2906318.2907350.2907378	0.00158553	0.866,0.819,0.797	0.982,0.938,0.94	-0.126
A3SS.Rdm1.10.89540703.89540883.89540719.89540883.89539555.89540464	0.00662625	0.775,0.875,0.92	1.0,0.949,1.0	-0.126
SE.Ctnnd1.3.72024076.72024195.72022864.72023017.72026302.72026484	1.20002e-07	0.789,0.906,0.931	1.0,1.0,1.0	-0.125
SE.Papd7.1.36428872.36429031.36428149.36428322.36430595.36430760	0.000141473	0.926,0.774,0.924	1.0,1.0,1.0	-0.125
SE.Armc6.16.20948866.20949440.20945039.20945122.20951615.20951747	0.000263588	0.758,1.0,0.82	1.0,1.0,0.954	-0.125
SE.Stat1.9.54327359.54327491.54324390.54324521.54327857.54327958	0.00877662	0.885,0.793,0.787	0.93,0.934,0.975	-0.125
SE.Pi4kb.2.196143500.196143670.196139754.196140092.196148405.196149342	0.0114838	0.061,0.093,0.069	0.128,0.298,0.172	-0.125
MXE.Pdlim5.2.247864908.247865028.247872164.247872296.247858118.247858291.247883195.247883232	0.0351821	0.801,0.962,0.807	0.945,1.0,1.0	-0.125
SE.Grb10.14.92063673.92063838.92060549.92060775.92076949.92077088	0.00375974	0.475,0.507,0.437	0.603,0.602,0.587	-0.124
SE.Ppp2r5e.6.98428169.98428256.98422299.98422425.98431000.98431128	0.0222816	1.0,0.698,0.857	1.0,1.0,0.927	-0.124
A5SS.Rpap3.7.139175712.139175811.139175748.139175811.139173429.139173650	0.00155153	0.837,0.847,0.851	1.0,0.933,0.973	-0.124
RI.Ptov1.1.100859348.100859723.100859348.100859474.100859657.100859723	0.0379705	0.636,0.646,0.685	0.837,0.867,0.636	-0.124
SE.Xpot.7.63719573.63719700.63717892.63718138.63720094.63720151	3.54346e-05	0.875,0.95,0.776	0.991,0.98,1.0	-0.123
SE.Hscb.12.51886698.51886746.51882758.51882903.51888503.51888669	8.51892e-05	0.856,0.91,0.83	0.976,0.99,1.0	-0.123
SE.Bod1.10.16262057.16262192.16259727.16260175.16264308.16264505	0.000136933	1.0,0.849,0.782	1.0,1.0,1.0	-0.123
SE.Cnot2.7.59544015.59544095.59541548.59541674.59556897.59556964	0.000199752	0.825,0.796,0.931	0.965,0.986,0.969	-0.123
SE.Rbm6.8.116596999.116597073.116564241.116564316.116609559.116609629	0.00184659	0.777,0.916,0.841	0.975,0.951,0.976	-0.123
SE.Gkap1.17.6799331.6799409.6795539.6795683.6802153.6802277	0.00894289	0.891,0.655,0.808	0.971,0.966,0.787	-0.123
A5SS.Ercc5.9.50925618.50925707.50925618.50925694.50929638.50929814	0.00633801	0.861,0.861,0.91	1.0,1.0,1.0	-0.123
SE.Dut.3.117524778.117524849.117524572.117524647.117525086.117525446	7.08969e-11	0.886,0.814,0.812	0.923,0.974,0.98	-0.122
SE.Slc39a7.20.3821306.3821418.3821060.3821198.3821597.3821651	1.75851e-10	0.824,0.889,0.841	0.987,0.959,0.974	-0.122
SE.Rae1.3.171016865.171017016.171015616.171015716.171017927.171018022	0.0137591	0.0,0.0,0.064	0.165,0.062,0.202	-0.122
SE.Nsmaf.5.19508384.19508462.19501356.19501507.19510162.19510269	0.0163692	0.89,0.961,0.782	1.0,1.0,1.0	-0.122
SE.Kdm2a.1.219578436.219578568.219574358.219575068.219578906.219579176	0.0433211	0.822,0.811,1.0	1.0,1.0,1.0	-0.122
SE.Zdhhc20.15.38110829.38110906.38109300.38109877.38113402.38113518	2.42719e-10	0.84,0.839,0.859	0.977,0.961,0.962	-0.121
SE.Rnf19b.5.147267746.147267878.147265130.147265338.147268733.147268794	7.55462e-10	0.867,0.893,0.878	1.0,1.0,1.0	-0.121
SE.Wsb1.10.66595569.66595659.66593700.66593832.66597190.66597359	5.62608e-08	0.863,0.92,0.853	1.0,1.0,1.0	-0.121
SE.Ltbp2.6.108507256.108507388.108506789.108506915.108511841.108511940	2.07083e-07	0.239,0.216,0.214	0.335,0.353,0.344	-0.121
SE.Rabggtb.2.260112916.260113027.260111256.260111406.260113857.260113963	0.000131099	0.891,0.871,0.875	1.0,1.0,1.0	-0.121
SE.Rpe.9.73708413.73708500.73707836.73707971.73709972.73710726	0.000575183	0.882,0.746,0.844	0.957,0.929,0.948	-0.121
SE.Slx1b.1.198117499.198117551.198117062.198117401.198119747.198120061	0.00188954	0.945,0.873,0.818	1.0,1.0,1.0	-0.121
SE.U2af1.20.10401977.10402044.10398227.10398435.10404486.10404574	0.0235116	0.88,0.835,0.921	1.0,1.0,1.0	-0.121
MXE.Mrpl17.1.170652832.170653057.170653089.170653141.170652293.170652651.170653389.170653458	8.7312e-05	0.358,0.338,0.329	0.491,0.466,0.432	-0.121
MXE.St6galnac4.3.11614711.11614899.11616201.11616289.11610248.11610434.11617592.11619593	0.000711977	0.832,0.901,0.851	0.964,0.982,1.0	-0.121
MXE.Znf740.7.143811288.143811412.143813885.143814035.143810891.143811209.143814342.143814468	0.0209996	0.034,0.04,0.141	0.154,0.187,0.237	-0.121
SE.Arglu1.16.86609126.86609338.86607203.86607429.86609695.86609779	7.64679e-11	0.034,0.108,0.074	0.178,0.182,0.215	-0.12
SE.U2surp.8.103277472.103277516.103274414.103274519.103278424.103278636	0.000258055	0.914,0.809,0.857	0.955,0.985,1.0	-0.12
SE.Pja2.9.112012579.112012788.112008330.112008516.112023470.112024515	0.0107016	0.514,0.583,0.579	0.73,0.65,0.656	-0.12
MXE.Acta2.1.252547558.252547611.252550033.252550213.252546868.252546997.252550360.252550394	0.0013349	0.807,0.809,0.767	0.882,0.93,0.931	-0.12
SE.Mbnl2.15.105670609.105670674.105640096.105640329.105687770.105688392	0	0.002,0.002,0.002	0.17,0.137,0.056	-0.119
SE.Slc39a7.20.3821306.3821421.3821060.3821198.3821597.3821651	2.25695e-10	0.828,0.893,0.846	0.988,0.96,0.975	-0.119
SE.Dlgap4.3.152836294.152836383.152833755.152834117.152836894.152837307	1.79854e-06	0.968,0.83,0.844	1.0,1.0,1.0	-0.119
SE.Rbm5.8.116512439.116512524.116512145.116512237.116512871.116512957	2.4945e-06	0.776,0.859,0.853	0.967,0.975,0.902	-0.119
SE.Hectd1.6.72547142.72547162.72541729.72541864.72548977.72549072	0.000521719	0.895,0.909,0.839	1.0,1.0,1.0	-0.119
SE.Ciao1.3.119673918.119674006.119671920.119672353.119676031.119676120	0.00095697	0.841,0.893,0.799	0.984,1.0,0.907	-0.119
SE.Zcchc6.17.5255501.5255602.5254642.5254729.5257903.5257961	0.00163251	0.876,0.888,0.83	0.975,0.975,1.0	-0.119
SE.Phrf1.1.214233884.214233982.214230344.214230472.214234252.214234428	0.00202578	0.856,0.949,0.839	1.0,1.0,1.0	-0.119
SE.Setd5.4.145055162.145055203.145054849.145055058.145055395.145055454	0.0294716	0.072,0.0,0.117	0.105,0.251,0.191	-0.119
MXE.Cd99.20.56194975.56195053.56195716.56195770.56193035.56193080.56196134.56196170	0	0.865,0.889,0.824	0.977,0.974,0.985	-0.119
MXE.Cast.2.1506233.1506323.1508220.1508334.1502956.1503025.1508807.1508861	0.000200545	0.368,0.328,0.314	0.435,0.488,0.443	-0.119
SE.Tmem39a.11.64740466.64740550.64733726.64733881.64743048.64743271	3.24694e-07	0.868,0.848,0.893	0.99,1.0,0.974	-0.118
SE.Ndufaf7.6.1536228.1536309.1534927.1535091.1537296.1537407	0.00146123	0.752,0.901,0.98	1.0,0.987,1.0	-0.118
SE.Fasn.10.109989926.109990025.109989491.109989743.109990143.109990364	0.00202155	0.962,0.905,0.778	1.0,1.0,1.0	-0.118
MXE.Myl6.7.2906623.2906664.2906805.2906976.2906136.2906318.2907350.2907378	0.000968195	0.875,0.826,0.827	0.983,0.955,0.943	-0.118
MXE.Mdm2.7.60734841.60734975.60737890.60737965.60728206.60728265.60742334.60742419	0.0153347	0.541,0.529,0.536	0.641,0.686,0.634	-0.118
SE.Usp14.18.1204575.1204680.1203073.1203177.1208831.1208864	6.04069e-09	0.844,0.827,0.897	0.96,0.989,0.971	-0.117
SE.Snx5.3.138385404.138385528.138382890.138382996.138386747.138386869	1.92357e-07	0.937,0.948,0.764	1.0,1.0,1.0	-0.117
SE.Guk1.10.45537705.45537802.45536806.45536991.45538165.45538207	1.35536e-06	0.826,0.884,0.831	0.952,0.974,0.966	-0.117
SE.Ncbp3.10.59634348.59634452.59633251.59633351.59636931.59637226	1.3578e-06	0.926,0.903,0.821	1.0,1.0,1.0	-0.117
SE.Pkdcc.6.6434042.6434231.6433704.6433784.6435741.6435915	3.36919e-06	0.906,0.906,0.837	1.0,1.0,1.0	-0.117
SE.Ggps1.17.53965571.53965642.53963184.53963277.53966383.53968585	3.78663e-05	0.928,0.844,0.795	1.0,0.972,0.944	-0.116
SE.Aftph.14.104931993.104932074.104927891.104928015.104933508.104933569	0.000218911	0.0,0.046,0.0	0.063,0.251,0.081	-0.116
SE.Smarca2.1.244765375.244765468.244757629.244757847.244776013.244776119	0.00168424	0.16,0.148,0.193	0.304,0.315,0.23	-0.116
SE.B3galnt2.17.54052575.54052702.54048086.54048283.54058949.54059097	0.00817862	0.82,0.833,0.81	0.943,0.918,0.951	-0.116
MXE.Myl6.7.2906623.2906664.2906805.2906957.2906136.2906318.2907350.2907378	0.00157596	0.88,0.832,0.815	0.983,0.946,0.945	-0.116
SE.Rrbp1.3.138058023.138058119.138057290.138057374.138059863.138059947	0	0.882,0.856,0.847	0.98,0.974,0.977	-0.115
SE.Arglu1.16.86609126.86609321.86607203.86607429.86609695.86609779	1.12031e-09	0.032,0.102,0.086	0.18,0.174,0.21	-0.115
SE.Dock7.5.117661910.117662000.117660903.117660999.117671360.117671530	1.50698e-05	0.923,0.861,0.854	1.0,1.0,0.983	-0.115
SE.Esco1.18.1818964.1819028.1816019.1816134.1826609.1828606	0.000310936	0.927,0.838,0.889	1.0,1.0,1.0	-0.115
SE.Eri3.5.136408906.136409014.136408499.136408575.136437824.136437941	0.000617673	0.05,0.0,0.017	0.161,0.252,0.0	-0.115
SE.Zcchc17.5.148554117.148554209.148548548.148548649.148555926.148556027	0.0103553	0.754,0.883,0.823	0.911,0.969,0.924	-0.115
SE.Arhgef25.7.70473258.70473323.70472692.70472765.70473485.70473700	0.0235702	0.757,0.895,0.715	0.876,0.865,0.972	-0.115
A3SS.Lpin2.9.119570783.119570907.119570786.119570907.119569847.119569955	0.0241441	0.845,0.96,0.803	1.0,1.0,0.953	-0.115
SE.Bptf.10.95292541.95292721.95288569.95290877.95293890.95294029	0.00267061	0.932,0.726,0.937	0.936,1.0,1.0	-0.114
SE.Fam134c.10.89012871.89012998.89012115.89012200.89013828.89013859	0.00632832	0.821,0.872,0.771	0.952,0.929,0.926	-0.114
SE.Tex264.8.115384876.115385168.115376231.115376453.115387289.115387356	0.00717264	0.786,0.835,0.829	0.937,0.926,0.93	-0.114
SE.Ptcd1.12.11229457.11229574.11226414.11227119.11230289.11230472	0.0182467	0.846,0.92,0.891	1.0,1.0,1.0	-0.114
SE.Srsf11.2.264862473.264862585.264856685.264856919.264864170.264864265	0.0230281	0.045,0.047,0.059	0.21,0.132,0.15	-0.114
SE.Htt.14.81232790.81232911.81226723.81226783.81238721.81238805	0.0450827	0.928,0.71,0.874	0.974,0.971,0.91	-0.114
MXE.Jmjd1c.20.22759934.22760109.22763941.22764064.22758550.22758727.22764462.22764593	0.0209483	0.624,0.678,0.656	0.833,0.768,0.699	-0.114
A5SS.Son.11.31832510.31832650.31832510.31832548.31833247.31833327	0.0124436	0.791,0.831,0.883	1.0,0.962,0.884	-0.114
A3SS.Hid1.10.103911541.103911658.103911541.103911655.103912194.103912365	0.00244203	0.0,0.0,0.037	0.088,0.118,0.173	-0.114
SE.Nomo1.1.102066045.102066165.102064317.102064419.102067870.102067963	1.69951e-12	0.873,0.891,0.889	1.0,1.0,0.993	-0.113
SE.Setd5.4.145055162.145055288.145054849.145055058.145055395.145055454	2.14474e-06	0.014,0.036,0.027	0.118,0.208,0.089	-0.113
SE.Sync.5.147495787.147495864.147495536.147495655.147498271.147498902	0.000322062	0.888,0.769,0.852	0.973,0.952,0.923	-0.113
SE.Cdr2l.10.103941952.103942056.103934796.103934893.103942328.103942441	0.00448955	0.084,0.054,0.0	0.059,0.234,0.184	-0.113
SE.Spen.5.160033800.160033914.160031838.160031939.160035638.160035752	0.00466077	0.807,1.0,0.854	1.0,1.0,1.0	-0.113
MXE.Lrrc47.5.171304921.171305037.171305430.171305533.171303864.171303981.171306064.171306154	0.0462552	0.343,0.373,0.282	0.484,0.448,0.404	-0.113
SE.Sclt1.2.128590411.128590589.128585383.128585482.128599094.128599186	3.68404e-05	0.839,0.854,0.919	0.978,0.97,1.0	-0.112
SE.Ttc3.11.34639757.34639821.34631079.34631134.34643702.34643763	3.99255e-05	0.831,0.862,0.883	0.981,0.976,0.954	-0.112
SE.Wwp2.19.39607776.39607897.39607544.39607616.39610051.39610211	0.000255141	0.934,0.845,0.884	1.0,1.0,1.0	-0.112
SE.Usp38.19.30680188.30680290.30677192.30677322.30685111.30685315	0.00487544	0.848,0.964,0.853	1.0,1.0,1.0	-0.112
A5SS.Gstm4.2.210837724.210837862.210837761.210837862.210836682.210836778	0.0130333	0.085,0.063,0.09	0.289,0.189,0.096	-0.112
A5SS.Reps1.1.13266185.13266310.13266185.13266247.13266810.13266973	0.0150873	0.886,1.0,0.685	1.0,0.907,1.0	-0.112
SE.Nr1d2.15.8741188.8741277.8739588.8739788.8744459.8744604	5.25668e-06	0.935,0.906,0.806	1.0,0.98,1.0	-0.111
SE.Ube2i.10.14622756.14622836.14620530.14620594.14624998.14625108	0.000150257	0.878,0.809,0.86	0.954,0.969,0.956	-0.111
SE.Fkbp7.3.63527000.63527185.63522402.63522818.63532683.63532835	0.000162198	0.776,0.867,0.883	0.959,0.975,0.925	-0.111
SE.Acer3.1.163209952.163210005.163208404.163208486.163212172.163212225	0.0016436	0.862,0.802,0.848	0.958,0.95,0.937	-0.111
SE.Cry2.3.81321215.81321284.81314148.81316328.81322100.81322193	0.00647605	0.917,0.747,0.932	1.0,1.0,0.928	-0.111
SE.Dis3.15.83493507.83493575.83493095.83493253.83493793.83494423	0.0176266	0.018,0.099,0.015	0.145,0.22,0.1	-0.111
SE.Clpx.8.70824843.70824885.70823289.70823449.70830019.70830196	0.0498718	0.842,0.803,0.852	0.945,0.885,1.0	-0.111
MXE.Tax1bp1.4.82812303.82812407.82816307.82816376.82808147.82808288.82820390.82820565	0.0198209	0.718,0.971,0.882	0.932,0.972,1.0	-0.111
A3SS.Ercc1.1.80266112.80266212.80266117.80266212.80263557.80263634	0.00666234	0.851,0.816,1.0	1.0,1.0,1.0	-0.111
SE.Zfp207.10.67769171.67769219.67768665.67768741.67770501.67770572	3.13793e-10	0.895,0.882,0.873	0.979,1.0,1.0	-0.11
SE.Sephs1.17.77331120.77331228.77329934.77330089.77333380.77333484	5.02332e-05	0.888,0.805,0.907	1.0,0.984,0.947	-0.11
SE.Elp5.10.56584993.56585220.56581949.56582131.56589850.56589931	0.00595994	0.758,0.846,0.84	0.888,0.931,0.954	-0.11
SE.Epc1.17.57310481.57310593.57309798.57309917.57316564.57316917	0.00661935	0.023,0.0,0.039	0.079,0.283,0.03	-0.11
SE.Cops3.10.46199372.46199578.46197023.46197116.46203014.46203144	0.0111581	1.0,0.862,0.788	1.0,0.981,1.0	-0.11
SE.Wsb1.10.66595569.66595692.66590031.66590204.66597190.66597359	0.0240331	0.885,0.881,0.905	1.0,1.0,1.0	-0.11
SE.Vipr2.6.143984451.143984549.143955999.143956097.143991630.143991737	0.0284554	0.797,0.557,0.852	0.934,1.0,0.601	-0.11
MXE.Sik3.8.50468660.50468785.50489413.50489622.50444892.50445054.50490066.50490177	0.0108928	0.823,0.871,0.73	0.941,0.881,0.931	-0.11
MXE.Ttc3.11.34638529.34638656.34639757.34640001.34631079.34631134.34643702.34643763	0.0274832	0.853,0.717,0.951	0.977,0.984,0.889	-0.11
A5SS.RGD1310429.10.67750773.67751002.67750862.67751002.67749491.67749572	0.000773679	0.0,0.042,0.0	0.084,0.144,0.144	-0.11
SE.Efemp2.1.220857297.220857377.220855824.220856031.220857617.220857734	4.38637e-07	0.865,0.825,0.845	0.961,0.935,0.967	-0.109
SE.Ythdf1.3.176429628.176429708.176421315.176422836.176430861.176430886	0.00326294	0.912,0.915,0.845	1.0,1.0,1.0	-0.109
SE.Rabl6.3.2821537.2821607.2819997.2820089.2824828.2824876	0.00668065	0.797,0.875,1.0	1.0,1.0,1.0	-0.109
SE.Rev3l.20.44927442.44927561.44925079.44925198.44930448.44930590	0.0349639	0.809,0.929,0.935	1.0,1.0,1.0	-0.109
A5SS.Sh3glb2.3.8919978.8920117.8920004.8920117.8919273.8919402	7.46586e-08	0.839,0.913,0.922	1.0,1.0,1.0	-0.109
A3SS.Nexn.2.257467235.257467442.257467235.257467343.257468601.257468643	5.82524e-09	0.036,0.073,0.036	0.151,0.18,0.14	-0.109
SE.Bclaf1.1.15805722.15805902.15799852.15799971.15809311.15809425	2.72992e-06	0.892,0.873,0.888	1.0,1.0,0.977	-0.108
SE.RGD1309995.7.26319295.26319362.26318437.26318524.26321712.26321807	8.24532e-06	0.945,0.799,0.918	1.0,0.985,1.0	-0.108
SE.Gadd45g.17.13392495.13392590.13392179.13392393.13393078.13393243	8.45611e-06	0.879,0.863,0.818	0.979,0.904,1.0	-0.108
SE.Akap9.4.27270842.27270983.27270251.27270355.27272021.27272243	9.38336e-05	0.85,0.941,0.886	1.0,1.0,1.0	-0.108
SE.Plaur.1.81338955.81339111.81332303.81332447.81339626.81339787	0.00247453	0.735,0.922,0.969	0.99,0.971,0.988	-0.108
SE.Orc4.3.33068553.33068624.33065365.33065432.33075583.33075685	0.00265536	0.017,0.064,0.0	0.063,0.07,0.272	-0.108
SE.Guk1.10.45537705.45537757.45536970.45537109.45538165.45538207	0.00287196	0.86,0.948,0.772	0.961,0.989,0.955	-0.108
SE.Commd9.3.91475367.91475402.91471703.91471829.91476316.91476420	0.00547535	0.951,0.703,0.944	1.0,0.956,0.965	-0.108
SE.Uckl1.3.177069305.177069322.177067379.177067478.177069892.177069954	0.0323076	0.914,0.851,0.849	0.95,0.987,1.0	-0.108
SE.Parp3.8.115178623.115178739.115178346.115178530.115179076.115179191	3.16105e-08	0.066,0.08,0.033	0.149,0.184,0.166	-0.107
SE.Adam17.6.43404312.43404401.43402648.43402699.43405179.43405258	1.04568e-07	0.896,0.933,0.838	1.0,0.989,1.0	-0.107
SE.Gipc1.19.24793295.24793413.24786627.24786695.24794419.24794740	1.52215e-05	0.0,0.013,0.019	0.102,0.062,0.189	-0.107
SE.Snrpa1.1.126970582.126970662.126969907.126970010.126971045.126971121	0.00137597	0.788,0.794,0.818	0.889,0.956,0.875	-0.107
SE.Kidins220.6.44310571.44310604.44304974.44305088.44312349.44312382	0.0114302	0.041,0.0,0.02	0.194,0.064,0.125	-0.107
SE.Ttc5.15.27705783.27705943.27704309.27704366.27707843.27707994	0.0123358	0.915,0.915,0.705	0.856,1.0,1.0	-0.107
SE.Pkig.3.160092922.160092991.160047295.160047340.160110121.160110337	0.0430169	0.713,0.677,0.686	0.823,0.777,0.797	-0.107
MXE.U2surp.8.103284120.103284219.103288717.103288827.103281924.103282039.103290555.103290600	0.00517941	0.053,0.022,0.107	0.168,0.161,0.175	-0.107
MXE.Slc25a36.8.104974182.104974414.104976193.104976302.104970035.104970220.104977289.104977390	0.0131603	0.0,0.0,0.072	0.158,0.077,0.158	-0.107
MXE.Cdc14b.17.1715583.1715700.1719802.1719887.1709702.1711137.1723405.1723503	0.031443	0.0,0.0,0.053	0.213,0.05,0.11	-0.107
A3SS.Pdlim5.2.247892368.247892477.247892368.247892460.247894038.247894081	0	0.032,0.021,0.024	0.177,0.139,0.081	-0.107
SE.Cops4.14.10737694.10737774.10737074.10737226.10748965.10749120	9.72676e-13	0.892,0.842,0.913	0.982,0.988,0.994	-0.106
SE.Ifrd1.6.60140724.60140833.60133232.60133361.60141351.60141530	2.68148e-10	0.926,0.924,0.807	0.987,1.0,0.987	-0.106
SE.Zmym2.15.37190895.37190967.37182106.37182319.37191948.37192099	0.000231721	0.885,0.856,0.92	0.979,1.0,1.0	-0.106
SE.Wsb1.10.66593700.66593832.66590031.66590204.66602846.66602987	0.000245737	0.964,0.857,0.861	1.0,1.0,1.0	-0.106
SE.Dap3.2.188228896.188229141.188227386.188227504.188229859.188229919	0.00300967	0.908,0.882,0.831	1.0,0.968,0.971	-0.106
SE.Atp9b.18.77466019.77466114.77450251.77450332.77477059.77477111	0.00377555	0.936,0.746,0.876	0.959,0.973,0.945	-0.106
SE.Cnot9.9.81794942.81795058.81793378.81793558.81799422.81799532	0.00695034	0.808,0.849,1.0	1.0,0.976,1.0	-0.106
SE.Hibch.9.53460547.53460606.53459781.53459863.53462640.53462727	0.000637879	0.924,0.773,0.93	1.0,0.964,0.978	-0.105
SE.Rilp.10.63661462.63661546.63660897.63661020.63661905.63662050	0.00228226	0.817,0.926,0.943	1.0,1.0,1.0	-0.105
SE.Prpsap2.10.48013765.48013836.48009058.48009446.48015492.48015641	0.00250232	0.83,0.887,0.953	0.984,1.0,1.0	-0.105
SE.Lcor.1.260791755.260791888.260775086.260775166.260824977.260826323	0.0201687	0.885,0.924,0.793	1.0,1.0,0.917	-0.105
MXE.Rrbp1.3.138059863.138059947.138060865.138060961.138057290.138057374.138061570.138061642	5.00288e-14	0.911,0.859,0.859	0.982,0.981,0.98	-0.105
MXE.Wisp2.3.160208409.160208502.160211891.160212108.160207912.160208200.160215416.160215671	0.000946879	0.502,0.469,0.54	0.587,0.625,0.614	-0.105
SE.Camk2d.2.231128620.231128709.231127233.231127462.231129881.231130336	9.22232e-07	0.812,0.879,0.849	0.958,0.965,0.93	-0.104
SE.Blmh.10.63219121.63219189.63217223.63217341.63220240.63220396	2.07184e-05	0.901,0.926,0.829	1.0,1.0,0.969	-0.104
SE.Bmp1.15.52178048.52178264.52177484.52177610.52181119.52181300	0.00662378	0.136,0.15,0.149	0.272,0.293,0.182	-0.104
SE.Arhgap12.17.54388937.54389036.54386779.54386896.54390587.54390665	0.0136566	0.885,1.0,0.802	1.0,1.0,1.0	-0.104
SE.Golim4.2.174346732.174346810.174341920.174342089.174347574.174347657	0.0445727	0.69,0.703,0.754	0.727,0.87,0.861	-0.104
MXE.Ifrd1.6.60135911.60136046.60140724.60140833.60133232.60133361.60141351.60141530	0.00311555	0.378,0.339,0.313	0.443,0.43,0.469	-0.104
A5SS.Ufd1l.11.86326214.86326347.86326240.86326347.86325822.86325855	0.00109319	0.84,0.773,0.825	0.91,0.923,0.916	-0.104
SE.Plekhg3.6.99648345.99648435.99643931.99644030.99648875.99648914	2.36719e-08	0.009,0.0,0.015	0.084,0.181,0.068	-0.103
SE.Wsb1.10.66595569.66595692.66593700.66593832.66597190.66597359	2.63536e-07	0.882,0.929,0.88	1.0,1.0,1.0	-0.103
SE.Cdc42bpa.13.98374475.98374718.98365047.98365181.98374929.98375040	0.00156902	0.74,0.8,0.719	0.873,0.884,0.81	-0.103
SE.Gmcl1.4.118517996.118518062.118515837.118515922.118518604.118518717	0.00266571	0.828,0.961,0.828	1.0,0.957,0.968	-0.103
SE.Tfdp1.16.81105464.81105531.81089291.81089364.81113893.81114000	0.0029887	0.885,0.791,0.809	0.95,0.926,0.919	-0.103
SE.Cds1.14.9421417.9421557.9411324.9411383.9422901.9422999	0.0380311	0.806,1.0,0.885	1.0,1.0,1.0	-0.103
SE.Jmjd1c.20.22793011.22793155.22792724.22792917.22796062.22796168	0.0403087	0.893,0.869,0.78	0.851,1.0,1.0	-0.103
SE.Tmem68.5.16388721.16388841.16387435.16387496.16392521.16392715	0.0441439	0.053,0.031,0.066	0.091,0.09,0.277	-0.103
SE.Ube2q2.8.59745301.59745377.59744779.59744840.59750383.59750442	0.0449957	0.836,0.93,0.926	1.0,1.0,1.0	-0.103
MXE.Tmem33.14.42541923.42542007.42551426.42551560.42540005.42540126.42552694.42552762	0.0181312	0.394,0.423,0.442	0.518,0.538,0.513	-0.103
A5SS.Cdk10.19.56024902.56024997.56024902.56024959.56026651.56026724	0.00435857	0.81,0.85,0.849	0.958,0.975,0.884	-0.103
A3SS.Ppp4r1.9.113569353.113569474.113569436.113569474.113567826.113567927	0.0478055	0.979,0.676,0.974	1.0,0.989,0.95	-0.103
SE.Bmp1.15.52178048.52178262.52177484.52177610.52181119.52181300	0.00793388	0.134,0.131,0.15	0.266,0.282,0.172	-0.102
SE.Nlrx1.8.48597221.48597285.48596763.48596852.48597797.48597867	0.0197056	0.916,0.891,0.886	1.0,1.0,1.0	-0.102
MXE.Mtmr2.8.12291841.12291912.12307727.12307833.12284527.12284747.12312368.12312444	1.2386e-05	0.048,0.0,0.052	0.165,0.104,0.137	-0.102
MXE.Cdk8.12.10530685.10530796.10534193.10534434.10527307.10527448.10561193.10561340	0.000211046	0.089,0.09,0.153	0.225,0.233,0.181	-0.102
MXE.Prr14l.14.83228689.83228848.83236399.83236920.83226600.83226733.83245279.83245352	0.0198209	0.0,0.119,0.062	0.207,0.157,0.122	-0.102
MXE.Sh3bp4.9.96271457.96271702.96277397.96279751.96242584.96242663.96286053.96286242	0.0222725	0.262,0.251,0.13	0.333,0.269,0.346	-0.102
A5SS.Cfap100.4.122329495.122329590.122329512.122329590.122327967.122328068	0.000261029	0.0,0.0,0.0	0.142,0.069,0.094	-0.102
A5SS.Wdr74.1.224935968.224936122.224935968.224935983.224936255.224936357	0.0132457	1.0,0.775,0.806	0.983,0.988,0.915	-0.102
A3SS.Zfp512.6.26300504.26300692.26300504.26300686.26314094.26314153	0.00565735	0.787,0.86,0.973	1.0,0.968,0.959	-0.102
SE.Cldnd1.11.43991375.43991419.43990844.43991154.43992511.43992598	6.17406e-06	0.0,0.0,0.013	0.141,0.073,0.103	-0.101
SE.Snx16.2.93524294.93524443.93523235.93523322.93537423.93537560	0.00414257	0.787,1.0,0.824	1.0,1.0,0.915	-0.101
SE.Gzf1.3.143009937.143010032.143006127.143007505.143011420.143011588	0.0282264	0.936,0.794,0.968	1.0,1.0,1.0	-0.101
MXE.Akt3.13.95208217.95208329.95230646.95230772.95196257.95196402.95348821.95348913	0.00427876	0.305,0.337,0.274	0.427,0.381,0.411	-0.101
A5SS.Tbccd1.11.81785313.81785811.81785313.81785390.81789539.81789689	0.0383335	0.907,0.962,0.811	1.0,0.984,1.0	-0.101
SE.Snapc3.5.101528909.101529092.101527575.101527653.101534430.101534515	0.00359218	0.107,0.194,0.19	0.056,0.078,0.055	0.101
SE.Ssbp2.2.20626714.20626804.20531359.20531444.20649050.20649110	0.0242077	0.835,0.836,0.873	0.788,0.735,0.719	0.101
SE.Tsc22d2.2.148630128.148630286.148607747.148609977.148652028.148652080	0.0320022	0.171,0.255,0.278	0.129,0.144,0.127	0.101
A5SS.Elf1.15.61854354.61854543.61854354.61854519.61856476.61856560	0.00283929	0.18,0.131,0.214	0.069,0.051,0.102	0.101
A5SS.Csf1.2.210529367.210529530.210529420.210529530.210528399.210528452	0.0119859	0.15,0.243,0.204	0.098,0.108,0.087	0.101
A3SS.Neurl4.10.56517128.56517303.56517144.56517303.56516937.56517023	0.0321666	0.081,0.139,0.107	0.025,0.0,0.0	0.101
RI.Huwe1.X.21519382.21519543.21519382.21519396.21519474.21519543	6.97528e-08	0.134,0.147,0.089	0.045,0.009,0.013	0.101
SE.Akap7.1.21204401.21204576.21189974.21190087.21211471.21211619	0.00944417	0.103,0.193,0.175	0.062,0.02,0.083	0.102
SE.Nipa2.1.114370823.114370944.114361083.114361312.114371821.114371897	0.00989207	0.955,1.0,0.957	0.802,0.838,0.967	0.102
MXE.Ybx1.5.138323870.138323953.138324359.138324561.138320570.138320848.138325003.138325093	0.0108903	0.227,0.278,0.246	0.14,0.122,0.183	0.102
A3SS.Sfpq.5.145084932.145085100.145084982.145085100.145084273.145084358	0	0.068,0.131,0.139	0.004,0.014,0.013	0.102
SE.Sirt1.20.26840659.26840781.26840021.26840169.26845990.26846143	3.71945e-06	0.135,0.162,0.095	0.019,0.019,0.044	0.103
SE.Sclt1.2.128652615.128652658.128642779.128642835.128653213.128653286	0.000100685	0.066,0.208,0.05	0.0,0.016,0.0	0.103
SE.Elf2.2.140357773.140357932.140324465.140324579.140366056.140366222	0.00287046	0.1,0.115,0.222	0.0,0.069,0.06	0.103
SE.Ep400.12.51963134.51963245.51960261.51961629.51975365.51975456	0.0159608	0.128,0.061,0.212	0.0,0.034,0.059	0.103
SE.Tmem65.7.98681157.98681283.98679945.98680013.98682811.98682856	5.31363e-09	0.145,0.09,0.142	0.034,0.006,0.025	0.104
MXE.Pdlim7.17.9658028.9658180.9658234.9658294.9654570.9654677.9658728.9658847	7.26954e-09	0.936,0.935,0.938	0.84,0.835,0.823	0.104
MXE.Lrrfip1.9.98215511.98215562.98233128.98233206.98204926.98205013.98239939.98239975	0.0066564	0.232,0.073,0.214	0.0,0.0,0.208	0.104
A5SS.Ubn1.10.10703614.10703823.10703694.10703823.10703363.10703510	0.000267886	0.045,0.1,0.229	0.021,0.015,0.025	0.104
A5SS.Phldb1.8.49044921.49045154.49045064.49045154.49038109.49038190	0.000805565	0.073,0.222,0.115	0.064,0.015,0.018	0.104
SE.Larp4b.17.63273004.63273073.63267259.63267342.63278516.63278664	4.03414e-14	0.077,0.092,0.146	0.0,0.0,0.0	0.105
SE.Dnajc1.17.85047697.85047791.85046028.85046119.85055550.85055644	7.86917e-12	0.106,0.096,0.144	0.004,0.0,0.027	0.105
SE.Ilf3.8.22413311.22413408.22402889.22403089.22423469.22423567	4.87541e-05	0.026,0.159,0.151	0.0,0.022,0.0	0.105
SE.Dcaf6.13.83620396.83620518.83606921.83607039.83634262.83634520	0.000314747	0.098,0.13,0.098	0.012,0.0,0.0	0.105
SE.Eya3.5.150855481.150855583.150855161.150855205.150859072.150859152	0.0189966	0.057,0.22,0.189	0.012,0.029,0.11	0.105
MXE.Pum1.5.148870605.148870792.148873985.148874137.148868268.148868362.148876565.148876704	0.000616777	0.074,0.22,0.081	0.0,0.061,0.0	0.105
MXE.Cdc42bpa.13.98365050.98365181.98374475.98374718.98353786.98353909.98374929.98375040	0.008131	0.372,0.416,0.468	0.279,0.307,0.355	0.105
SE.Paqr6.2.187740526.187740586.187740119.187740216.187740890.187741150	0.0251646	1.0,0.969,1.0	0.752,0.9,1.0	0.106
SE.Phldb2.11.57442465.57442594.57430886.57431024.57449835.57449991	0.0263699	0.72,0.764,0.73	0.64,0.643,0.614	0.106
MXE.Dmd.X.53463504.53463570.53466216.53466375.53456986.53457123.53492162.53492406	3.35112e-07	0.115,0.115,0.089	0.0,0.0,0.0	0.106
A5SS.Lgals8.17.66511632.66511870.66511831.66511870.66509786.66509929	0.000143266	0.241,0.206,0.181	0.069,0.139,0.102	0.106
A3SS.Smg5.2.187722354.187722511.187722385.187722511.187720993.187721072	0.0332864	0.217,0.195,0.089	0.066,0.057,0.061	0.106
RI.RGD621098.19.37204567.37204795.37204567.37204602.37204736.37204795	7.10342e-08	0.077,0.148,0.12	0.007,0.0,0.019	0.106
SE.Aplp2.8.32305113.32305149.32302487.32302573.32306627.32306780	0	0.151,0.153,0.167	0.037,0.064,0.049	0.107
SE.Nasp.5.135455434.135456415.135450733.135450813.135457031.135457141	0.00216452	0.239,0.329,0.305	0.201,0.164,0.188	0.107
SE.Map4k4.9.46756870.46757032.46755903.46756119.46759177.46759402	0.00654087	1.0,1.0,0.926	0.879,0.92,0.807	0.107
MXE.Faxdc2.10.43509011.43509133.43512008.43512069.43505489.43505695.43512192.43512287	0.0197826	0.068,0.214,0.172	0.083,0.05,0.0	0.107
MXE.Rcan1.11.32544102.32544262.32545567.32545741.32539682.32541339.32550374.32550539	0.0458366	0.447,0.443,0.432	0.369,0.367,0.266	0.107
A5SS.Cdkn1a.20.6351457.6351669.6351457.6351547.6356439.6356895	0	0.141,0.148,0.145	0.023,0.03,0.06	0.107
A5SS.Srek1.2.33828803.33828974.33828849.33828974.33826076.33826241	8.79155e-05	0.082,0.201,0.086	0.0,0.031,0.016	0.107
SE.Wnk1.4.152489208.152490447.152487411.152487492.152495337.152495525	1.79492e-09	0.189,0.171,0.197	0.086,0.072,0.075	0.108
SE.Rnf19b.5.147262619.147262825.147261951.147262066.147263861.147264002	1.60734e-07	0.133,0.151,0.191	0.031,0.106,0.013	0.108
SE.Impact.18.4331042.4331138.4329878.4329941.4334633.4334719	1.65278e-05	0.158,0.111,0.209	0.051,0.068,0.036	0.108
SE.Zfp512b.3.177087003.177087146.177086586.177086715.177087383.177087509	0.00848848	1.0,0.874,1.0	0.856,0.86,0.835	0.108
SE.Kdm2b.12.39150163.39150277.39149687.39149948.39150828.39150867	0.0127734	1.0,1.0,0.933	0.817,0.865,0.926	0.108
MXE.Usf1.13.89801110.89801338.89802064.89802114.89797799.89797845.89802263.89802379	0.00155414	0.085,0.267,0.126	0.021,0.062,0.072	0.108
MXE.Zdhhc20.15.38110829.38110906.38113402.38113518.38109472.38109877.38113865.38113910	0.008131	0.332,0.295,0.334	0.186,0.231,0.22	0.108
A5SS.Slc10a3.X.156336449.156336689.156336449.156336487.156336984.156337053	0.00165392	0.092,0.237,0.054	0.037,0.0,0.023	0.108
A5SS.Hps3.2.104812737.104812948.104812793.104812948.104811820.104811929	0.0032164	0.124,0.142,0.1	0.0,0.042,0.0	0.108
SE.Kif1b.5.166036604.166036853.166031339.166031458.166038320.166038458	7.62177e-07	0.116,0.197,0.129	0.045,0.021,0.05	0.109
SE.RGD1311345.17.6688546.6688617.6684620.6684649.6688996.6690723	0.000257808	1.0,1.0,0.973	0.784,0.927,0.935	0.109
SE.Adgra2.16.69097318.69097522.69095935.69097208.69097924.69098070	0.000954349	1.0,1.0,0.924	0.819,0.879,0.9	0.109
MXE.Ugdh.14.44492822.44492946.44495288.44495383.44492173.44492371.44496990.44497121	0.0178646	0.26,0.272,0.225	0.153,0.132,0.146	0.109
MXE.Sync.5.147495530.147495655.147495787.147495864.147482282.147483432.147498271.147498902	0.0269694	0.694,0.741,0.735	0.623,0.613,0.606	0.109
MXE.Agpat5.16.75820514.75820605.75825656.75825746.75818129.75818291.75828126.75828224	0.0393635	0.591,0.588,0.606	0.516,0.478,0.463	0.109
A5SS.RGD1564420.7.99658472.99658644.99658530.99658644.99656586.99656758	7.80686e-06	0.035,0.236,0.114	0.005,0.01,0.042	0.109
A5SS.Top1.3.156683091.156683271.156683091.156683198.156690909.156691025	1.05045e-05	0.14,0.081,0.161	0.032,0.022,0.0	0.109
RI.Sec24c.15.4046033.4046405.4046033.4046114.4046231.4046405	0.0267255	0.907,1.0,0.958	0.755,0.942,0.841	0.109
SE.Slc44a2.8.22383753.22383881.22383221.22383306.22384523.22385864	0.00026834	0.143,0.188,0.167	0.046,0.067,0.056	0.11
SE.Arntl.1.178107659.178107680.178107078.178107231.178109131.178109170	0.000424099	0.126,0.091,0.179	0.021,0.045,0.0	0.11
SE.Rnf25.9.81879181.81879216.81877624.81877699.81880056.81880105	0.045799	0.27,0.0,0.091	0.0,0.0,0.031	0.11
MXE.Calu.4.56638211.56638401.56638471.56638665.56632932.56633163.56642813.56642980	3.41352e-05	0.677,0.661,0.645	0.511,0.554,0.588	0.11
MXE.Myo9b.16.19728262.19728397.19728833.19728923.19727732.19727814.19730695.19730809	0.000191171	0.205,0.113,0.157	0.054,0.048,0.042	0.11
MXE.P4ha1.20.28952378.28952449.28953359.28953430.28949921.28950098.28962368.28962468	0.000632272	0.328,0.408,0.309	0.253,0.214,0.249	0.11
MXE.Cblb.11.51101844.51101982.51105605.51105690.51100412.51100500.51110594.51110751	0.000707391	0.072,0.179,0.079	0.0,0.0,0.0	0.11
A3SS.Ripk1.17.31563359.31563604.31563359.31563516.31564230.31564450	1.37865e-08	0.059,0.133,0.147	0.009,0.0,0.0	0.11
A3SS.Map3k2.18.25001850.25002034.25001920.25002034.24998861.24998961	6.96617e-05	0.068,0.232,0.043	0.012,0.0,0.0	0.11
A3SS.Zfp335.3.161365953.161366060.161365953.161365972.161366765.161366878	0.000834423	0.102,0.185,0.121	0.013,0.021,0.044	0.11
SE.Ppfibp1.4.181394960.181394993.181393584.181393699.181396178.181396240	8.77352e-11	0.968,0.983,0.962	0.809,0.824,0.946	0.111
SE.Ube2j2.5.173375015.173375178.173372668.173372835.173377736.173377867	0.00253726	0.933,0.927,0.868	0.796,0.773,0.826	0.111
SE.Ubac2.15.108394811.108394859.108384322.108384446.108403962.108404208	0.0269067	0.933,0.916,0.953	0.847,0.818,0.805	0.111
MXE.Rnf19b.5.147262619.147262825.147263861.147264002.147261951.147262066.147265130.147265338	7.39909e-09	0.135,0.172,0.164	0.028,0.092,0.018	0.111
A3SS.Wdr74.1.224935706.224935854.224935773.224935854.224934287.224934412	0.00212699	0.074,0.162,0.176	0.027,0.025,0.026	0.111
SE.Tns1.9.81216556.81216713.81208146.81208345.81217396.81217489	1.21931e-09	0.117,0.146,0.132	0.011,0.03,0.018	0.112
SE.Ints6.15.45901131.45901354.45882172.45882356.45910845.45910935	1.53014e-05	0.121,0.225,0.127	0.061,0.038,0.037	0.112
MXE.Mbnl1.2.150858305.150858459.150864801.150864896.150855965.150856223.150867718.150867775	4.76893e-10	0.851,0.861,0.861	0.713,0.738,0.786	0.112
MXE.Myo9b.16.19728262.19728397.19728833.19728923.19727732.19727814.19732535.19732575	7.25131e-05	0.177,0.12,0.182	0.054,0.051,0.038	0.112
MXE.Acyp2.14.115006908.115006972.115032973.115033083.114891245.114891985.115052178.115052450	0.000362744	1.0,1.0,1.0	0.915,0.874,0.875	0.112
A5SS.Kif1b.5.166059930.166060118.166060052.166060118.166051412.166054005	3.7982e-06	0.076,0.221,0.164	0.051,0.028,0.045	0.112
A5SS.Plpp5.16.71124993.71125102.71125033.71125102.71124727.71124818	0.00959079	1.0,0.914,0.922	0.855,0.834,0.81	0.112
A5SS.Mtg2.3.175462654.175462793.175462654.175462786.175463586.175464117	0.0132457	0.942,1.0,0.914	0.814,0.787,0.918	0.112
A5SS.Vldlr.1.245256105.245256351.245256105.245256294.245257908.245258280	0.0222048	1.0,0.888,0.915	0.767,0.852,0.848	0.112
A5SS.Smim8.5.50239317.50239419.50239372.50239419.50232912.50233069	0.041003	1.0,1.0,0.911	0.825,0.906,0.845	0.112
SE.Rnpc3.2.216503296.216503510.216502417.216502501.216504945.216505064	0.000250823	0.121,0.24,0.122	0.031,0.028,0.085	0.113
SE.Herc4.20.26801067.26801170.26800396.26800569.26810884.26811004	0.000387307	0.235,0.07,0.146	0.095,0.017,0.0	0.113
SE.Top1.3.156694986.156695174.156690909.156691025.156695373.156695495	3.33489e-13	0.051,0.168,0.147	0.004,0.004,0.017	0.114
SE.Cnot2.7.59575090.59575318.59566763.59566886.59587241.59587385	0.00201453	0.17,0.319,0.156	0.108,0.073,0.121	0.114
SE.Paqr6.2.187740541.187740586.187740119.187740216.187740890.187740910	0.0316767	1.0,0.963,1.0	0.719,0.903,1.0	0.114
A3SS.Ssb.3.56101178.56101334.56101214.56101334.56100887.56101083	0.00114624	0.855,0.804,0.84	0.732,0.753,0.672	0.114
A3SS.Prrc2a.20.5150289.5150525.5150289.5150503.5150606.5150697	0.0166186	0.137,0.185,0.04	0.0,0.0,0.019	0.114
SE.Nexn.2.257473210.257473402.257472450.257472595.257474706.257474779	0.000752207	0.312,0.317,0.276	0.149,0.205,0.207	0.115
SE.Ctnnd1.3.72026302.72026591.72024076.72024148.72052711.72052990	1.53222e-06	0.988,0.94,0.94	0.843,0.843,0.835	0.116
SE.Ggnbp2.10.72171307.72171549.72171106.72171220.72175212.72175311	3.14667e-06	0.231,0.156,0.264	0.087,0.088,0.127	0.116
SE.Slc9a8.3.164205504.164205604.164202712.164202856.164205713.164205852	0.00286203	0.09,0.208,0.124	0.045,0.0,0.028	0.116
SE.Dera.4.171770055.171770155.171748272.171748379.171771454.171771602	0.00360458	1.0,1.0,0.87	0.883,0.89,0.749	0.116
MXE.Dera.4.171775130.171775265.171787748.171787877.171772679.171772775.171821446.171821559	0.0407868	0.601,0.636,0.543	0.491,0.455,0.487	0.116
A5SS.Tubb4b.3.2444067.2444281.2444224.2444281.2443809.2443918	0	0.09,0.143,0.136	0.008,0.005,0.009	0.116
A5SS.Elp3.15.49004845.49005058.49004961.49005058.49001514.49001614	7.39045e-05	0.223,0.238,0.212	0.098,0.115,0.113	0.116
A5SS.Elp3.15.49004904.49005058.49004961.49005058.49001514.49001614	0.013116	0.35,0.364,0.364	0.265,0.224,0.241	0.116
A3SS.Tmem5.7.64339787.64339985.64339787.64339943.64340779.64341207	0.000145474	0.146,0.087,0.139	0.024,0.0,0.0	0.116
A3SS.Sbno2.7.12509496.12509617.12509537.12509617.12509025.12509123	0.000768933	0.116,0.142,0.115	0.0,0.026,0.0	0.116
SE.Ppp3cc.15.51954720.51954838.51944701.51944899.51967757.51967806	0.0272297	0.203,0.107,0.215	0.034,0.056,0.084	0.117
SE.Rrp8.1.170576940.170577307.170576277.170576731.170578535.170578693	0.0395767	1.0,1.0,0.925	0.929,0.865,0.78	0.117
MXE.Ppp1r12a.7.51431355.51431446.51431813.51431999.51425329.51425420.51432783.51432888	0.00102661	0.744,0.805,0.805	0.67,0.663,0.67	0.117
A3SS.Ldlr.8.22763755.22763943.22763823.22763943.22763185.22763308	0	0.122,0.136,0.12	0.015,0.012,0.0	0.117
A3SS.Nup153.17.18391629.18391773.18391674.18391773.18391138.18391202	3.6308e-07	0.094,0.103,0.184	0.009,0.007,0.014	0.117
A3SS.Atpaf2.10.46772600.46772702.46772600.46772681.46774108.46774278	0.00152631	0.144,0.121,0.21	0.022,0.054,0.048	0.117
A3SS.Dimt1.2.38132611.38132851.38132777.38132851.38132381.38132492	0.00206538	0.139,0.195,0.175	0.046,0.063,0.048	0.117
SE.Zfp407.18.81225281.81225360.81208328.81208554.81289814.81289889	0.00127781	0.218,0.137,0.0	0.0,0.0,0.0	0.118
A5SS.Sik3.8.50489413.50489622.50489413.50489532.50490066.50490177	0.000537331	0.03,0.239,0.109	0.006,0.019,0.0	0.118
A5SS.Zc3h10.7.2971547.2971687.2971623.2971687.2968434.2970401	0.00501457	0.064,0.182,0.195	0.0,0.043,0.045	0.118
RI.Aamp.9.81562344.81562565.81562344.81562408.81562496.81562565	0	0.116,0.135,0.187	0.003,0.031,0.049	0.118
RI.Hsd17b8.20.3817841.3818070.3817841.3817884.3818008.3818070	7.46768e-11	0.133,0.091,0.13	0.0,0.0,0.0	0.118
SE.Eln.12.24995610.24995681.24994166.24994202.24995898.24996033	3.501e-09	0.91,0.897,0.877	0.743,0.744,0.839	0.119
SE.Tmem245.5.73959850.73959949.73955661.73955766.73961474.73961644	3.66942e-05	0.126,0.246,0.155	0.013,0.062,0.095	0.119
SE.Tbc1d7.17.23783399.23783438.23782874.23783012.23786111.23786299	0.00290752	0.12,0.181,0.13	0.0,0.0,0.074	0.119
SE.Snrnp70.1.101374141.101374201.101371724.101371826.101375152.101375234	0.0304328	0.184,0.286,0.381	0.113,0.184,0.196	0.119
MXE.Fbln5.6.125719402.125719457.125723201.125723435.125717303.125717349.125723715.125723732	1.34049e-11	0.17,0.191,0.212	0.082,0.056,0.079	0.119
MXE.Ppfibp1.4.181394960.181394993.181396178.181396240.181393584.181393699.181397354.181397430	0.00272642	0.464,0.413,0.462	0.295,0.351,0.335	0.119
MXE.Armcx2.X.105620854.105620954.105621467.105621657.105620512.105620578.105622098.105622156	0.0338754	0.398,0.359,0.373	0.252,0.239,0.282	0.119
A5SS.Rps6kb1.10.73835077.73835208.73835117.73835208.73834871.73834962	1.71812e-07	0.109,0.192,0.073	0.008,0.009,0.0	0.119
A5SS.Txlna.5.147845982.147846095.147846076.147846095.147845360.147845532	0.0455244	0.287,0.22,0.301	0.067,0.165,0.219	0.119
A3SS.Zfyve27.1.261428237.261428435.261428363.261428435.261427686.261427826	0.000220495	0.204,0.139,0.112	0.018,0.027,0.052	0.119
A3SS.Wwc2.16.47509876.47510091.47509960.47510091.47505808.47505973	0.00820209	0.123,0.22,0.175	0.042,0.039,0.081	0.119
A3SS.Tpm4.16.19389542.19389781.19389542.19389612.19390227.19390294	0.0186428	0.872,1.0,1.0	0.742,0.772,1.0	0.119
SE.Mrpl55.10.45555143.45555365.45554527.45554729.45555438.45555943	0.000254649	0.26,0.243,0.207	0.105,0.139,0.106	0.12
MXE.Fbln5.6.125719402.125719457.125723201.125723440.125717303.125717349.125723715.125723732	9.67349e-12	0.168,0.19,0.22	0.081,0.057,0.081	0.12
A5SS.Nipa2.1.114371625.114371897.114371821.114371897.114370823.114370944	0.00113843	1.0,1.0,1.0	0.901,0.74,1.0	0.12
SE.Srsf5.6.104613498.104613685.104613016.104613086.104614316.104614390	0	0.204,0.188,0.188	0.062,0.076,0.078	0.121
SE.Dennd1b.13.56120365.56120425.56115264.56115341.56121584.56121638	0.00014684	0.153,0.254,0.192	0.038,0.0,0.199	0.121
A5SS.Srek1.2.33828796.33828974.33828849.33828974.33826076.33826241	7.80686e-06	0.102,0.194,0.123	0.0,0.039,0.016	0.121
SE.Slc4a7.15.11898189.11898428.11890228.11890310.11912670.11912916	0.00652582	0.102,0.266,0.133	0.068,0.019,0.049	0.122
MXE.Ppp1r12a.7.51431355.51431446.51431813.51431966.51425329.51425420.51432783.51432888	0.000695401	0.743,0.807,0.803	0.667,0.66,0.659	0.122
MXE.Arid1b.1.46152919.46153005.46169781.46169961.46130642.46130886.46182842.46183170	0.0449036	0.071,0.291,0.033	0.03,0.0,0.0	0.122
SE.Ndufv3.20.10271414.10272464.10267338.10267462.10275071.10275304	0.0128079	0.79,0.755,0.827	0.665,0.71,0.629	0.123
SE.Eln.12.24995615.24995681.24994166.24994202.24995898.24996033	2.54845e-09	0.905,0.892,0.872	0.733,0.733,0.83	0.124
SE.Pdlim7.17.9659208.9659225.9658728.9658847.9659478.9659615	1.42888e-05	0.143,0.141,0.231	0.055,0.016,0.072	0.124
SE.Aifm2.20.31341556.31341642.31340296.31340412.31342035.31342128	0.0244254	1.0,1.0,0.878	0.931,0.865,0.711	0.124
MXE.Ttc3.11.34613498.34613649.34614051.34614139.34613059.34613102.34616101.34616155	1.74632e-05	0.778,0.833,0.757	0.712,0.653,0.632	0.124
A3SS.Nop56.3.122804276.122804502.122804387.122804502.122803989.122804079	2.92876e-09	0.217,0.103,0.119	0.03,0.013,0.024	0.124
A3SS.Tcf12.8.78370997.78371204.78370997.78371201.78373385.78373462	0.00939942	0.947,1.0,1.0	0.912,0.77,0.894	0.124
SE.Zfp644.14.4175471.4175546.4154609.4154670.4178530.4180743	2.10067e-05	0.111,0.125,0.169	0.015,0.014,0.0	0.125
SE.Dzip3.11.54436503.54436556.54435751.54435844.54439837.54439914	0.032961	1.0,0.944,1.0	0.907,0.791,0.872	0.125
MXE.Hbs1l.1.16831852.16832073.16848501.16848609.16830464.16830659.16859046.16859155	0.0146757	1.0,1.0,1.0	0.921,0.85,0.853	0.125
SE.Wipi2.12.13971684.13971818.13971443.13971551.13972500.13972665	0.000133244	0.0,0.286,0.133	0.0,0.0,0.042	0.126
SE.Chd8.15.28617131.28617311.28616655.28616772.28617511.28617625	0.00770067	0.924,0.911,0.982	0.807,0.854,0.778	0.126
A5SS.Osmr.2.56151322.56151531.56151455.56151531.56143482.56143652	1.10783e-07	0.085,0.17,0.182	0.017,0.026,0.016	0.126
A5SS.Zfp719.1.99507843.99507970.99507843.99507933.99510576.99512489	0.0277682	1.0,1.0,1.0	0.744,0.877,1.0	0.126
A5SS.Dus1l.10.109976828.109977034.109976983.109977034.109976553.109976666	0.0477727	0.196,0.25,0.199	0.089,0.124,0.053	0.126
SE.P3h3.4.157360111.157360160.157359331.157359859.157362981.157363057	8.05508e-05	0.98,0.958,0.903	0.798,0.772,0.889	0.127
SE.Tmem134.1.219378874.219378919.219375803.219375880.219379067.219379121	0.001124	0.828,0.855,0.796	0.653,0.703,0.742	0.127
SE.Donson.11.31839537.31839750.31837838.31838612.31840560.31840759	0.0236009	1.0,1.0,1.0	0.849,0.912,0.858	0.127
MXE.Prkd1.6.71078255.71078362.71078452.71078700.71061679.71061841.71079788.71079861	0.00153727	0.072,0.255,0.138	0.085,0.0,0.0	0.127
MXE.Sacs.15.41488261.41488412.41498105.41498217.41458767.41459227.41503710.41503857	0.0137277	0.214,0.207,0.213	0.157,0.058,0.037	0.127
A3SS.Zbtb17.5.160011261.160011480.160011357.160011480.160010957.160011119	0.0179459	0.26,0.105,0.119	0.01,0.055,0.038	0.127
RI.Zfp335.3.161357693.161357936.161357693.161357775.161357853.161357936	0.0041832	0.188,0.15,0.157	0.067,0.046,0.0	0.127
SE.Golga3.12.52557713.52557915.52553529.52553848.52558267.52558606	2.35912e-05	0.131,0.191,0.163	0.029,0.03,0.041	0.128
SE.Agk.4.68506239.68506279.68487769.68487876.68511207.68511287	9.88672e-05	1.0,1.0,1.0	0.853,0.764,1.0	0.128
SE.Npnt.2.238034820.238034919.238030380.238030500.238038134.238038227	0.0200717	0.4,0.169,0.266	0.224,0.127,0.101	0.128
MXE.Ankrd12.9.113636821.113636969.113662078.113666754.113634096.113634239.113670632.113670731	1.66505e-05	0.201,0.193,0.203	0.041,0.076,0.095	0.128
SE.Gclc.8.85089752.85089956.85089512.85089651.85090079.85090192	0	0.122,0.22,0.108	0.016,0.019,0.028	0.129
SE.RGD1308134.10.56845940.56846045.56845382.56845709.56846268.56846456	0.00276759	1.0,0.914,1.0	0.911,0.84,0.776	0.129
MXE.Osbpl5.1.216880168.216880353.216881514.216881707.216879707.216879789.216881974.216882146	0.00102484	0.721,0.739,0.684	0.555,0.644,0.558	0.129
A3SS.Ssb.3.56101164.56101331.56101214.56101331.56100887.56101083	0.00459259	0.804,0.746,0.785	0.669,0.687,0.592	0.129
A3SS.Ddx3x.X.10409806.10409919.10409806.10409851.10410652.10410710	0.0134765	0.167,0.333,0.231	0.08,0.064,0.201	0.129
SE.Med13.10.73735532.73735733.73734471.73734562.73736032.73736154	7.81194e-10	0.132,0.24,0.149	0.047,0.014,0.071	0.13
SE.Dock7.5.117663858.117663948.117661910.117662000.117671360.117671530	3.50212e-08	0.088,0.175,0.191	0.014,0.032,0.017	0.13
MXE.Srsf3.20.6294502.6294667.6295543.6295582.6293248.6293383.6295741.6295828	0	0.173,0.164,0.204	0.045,0.046,0.061	0.13
MXE.Rps24.16.760364.760382.761662.761682.759685.759796.762005.762075	0	0.205,0.181,0.155	0.047,0.047,0.057	0.13
MXE.Srsf5.6.104613348.104613385.104613498.104613685.104613016.104613086.104614316.104614390	1.48081e-05	0.149,0.172,0.194	0.059,0.045,0.021	0.13
A3SS.Ssb.3.56101157.56101334.56101214.56101334.56100887.56101083	0.00523057	0.798,0.737,0.778	0.661,0.678,0.585	0.13
SE.Sirt1.20.26840659.26840784.26840021.26840169.26845990.26846143	2.97624e-07	0.142,0.212,0.133	0.036,0.027,0.03	0.131
SE.Tnip1.10.40278353.40278412.40275511.40275703.40280071.40280193	0.00410739	1.0,1.0,1.0	0.904,0.899,0.805	0.131
SE.Sfxn1.17.11050245.11050265.11049429.11049479.11057626.11057676	0.02735	0.197,0.172,0.09	0.02,0.014,0.032	0.131
A5SS.Srsf5.6.104611025.104611274.104611025.104611149.104612018.104612163	5.00694e-07	0.309,0.288,0.315	0.207,0.153,0.16	0.131
A5SS.Eny2.7.83348693.83348826.83348693.83348757.83350099.83350176	0.0200233	0.282,0.319,0.287	0.171,0.164,0.16	0.131
A5SS.Fzd6.7.77926733.77926958.77926733.77926882.77927638.77928067	0.0275171	0.0,0.324,0.139	0.028,0.023,0.02	0.131
A3SS.Wdtc1.5.151496939.151497048.151496939.151497045.151497586.151497659	0.00524009	0.974,1.0,1.0	0.928,0.8,0.853	0.131
SE.Thada.6.7568643.7568696.7547049.7547218.7569960.7570092	2.00323e-05	0.215,0.063,0.131	0.0,0.013,0.0	0.132
SE.Gabbr1.20.1962702.1962825.1960643.1960760.1966078.1966156	0.00533037	1.0,1.0,1.0	0.823,0.883,0.899	0.132
MXE.Mcts1.X.124895774.124895927.124896410.124896508.124894465.124894643.124899462.124899596	0.00058359	0.55,0.539,0.477	0.412,0.391,0.367	0.132
SE.Gopc.20.33491527.33491551.33488730.33488906.33492928.33493093	2.21003e-07	0.247,0.068,0.122	0.0,0.013,0.026	0.133
SE.Nop14.14.81346682.81346794.81346367.81346502.81347827.81347950	1.04948e-05	0.098,0.105,0.229	0.0,0.02,0.014	0.133
MXE.Mark3.6.136084556.136084622.136091073.136091144.136081573.136081622.136093197.136093254	0.0247227	0.62,0.611,0.501	0.411,0.473,0.45	0.133
A3SS.Ncoa3.3.162762322.162762527.162762422.162762527.162734488.162734568	3.26425e-05	0.051,0.177,0.257	0.0,0.042,0.043	0.133
A3SS.Wapl.16.11051227.11051389.11051288.11051389.11046371.11047421	0.014087	0.901,0.821,0.804	0.681,0.737,0.71	0.133
MXE.Sun1.12.17506361.17506472.17506761.17506848.17503896.17503995.17507665.17507863	0.0338754	0.222,0.287,0.257	0.116,0.16,0.089	0.134
A5SS.Mllt6.10.85615060.85615277.85615060.85615193.85616046.85616658	0.0145549	0.239,0.13,0.221	0.083,0.0,0.104	0.134
SE.St5.1.174155609.174155825.174154576.174154673.174158235.174158422	1.15645e-06	1.0,1.0,0.98	0.873,0.808,0.895	0.135
SE.Pxn.12.46802587.46802689.46802153.46802324.46807040.46807176	0.00743888	0.157,0.314,0.236	0.077,0.092,0.133	0.135
MXE.Ppp1r12a.7.51431355.51431446.51431813.51431945.51425329.51425420.51432783.51432888	0.000946879	0.697,0.777,0.779	0.625,0.605,0.617	0.135
MXE.Setd3.6.132071224.132071373.132074079.132074226.132069379.132069452.132075772.132075875	0.036149	0.345,0.453,0.305	0.215,0.212,0.27	0.135
A5SS.Ddx55.12.37455481.37455698.37455583.37455698.37455126.37455295	2.15029e-06	0.074,0.216,0.116	0.0,0.0,0.0	0.135
SE.Tcta.8.117081417.117081472.117079094.117080369.117081799.117082162	8.2998e-05	0.888,0.942,0.939	0.798,0.737,0.827	0.136
SE.Fn1.9.78911969.78912000.78911608.78911715.78912688.78912778	0.0186418	0.432,0.449,0.52	0.3,0.367,0.326	0.136
MXE.Fbln5.6.125719402.125719457.125723201.125723380.125717303.125717349.125723715.125723732	0	0.168,0.21,0.22	0.07,0.048,0.071	0.136
A5SS.Mtch1.20.6941742.6941887.6941793.6941887.6939074.6939122	0.000151103	0.498,0.513,0.493	0.366,0.392,0.338	0.136
A5SS.Nup107.7.60822956.60823181.60823089.60823181.60822598.60822685	0.00304196	0.199,0.0,0.284	0.0,0.018,0.057	0.136
MXE.Col5a1.3.6570755.6570824.6574346.6574580.6568350.6568463.6578711.6578882	6.4297e-12	0.278,0.337,0.304	0.129,0.203,0.177	0.137
A5SS.Ammecr1l.18.24554710.24554888.24554710.24554825.24555805.24555896	2.95303e-05	0.162,0.209,0.088	0.03,0.0,0.018	0.137
A5SS.Fam160a2.1.170227171.170227810.170227624.170227810.170226694.170226853	0.00113843	0.972,1.0,1.0	0.779,0.835,0.947	0.137
A3SS.Cuedc1.10.75511595.75511800.75511706.75511800.75510785.75510857	6.85617e-05	0.116,0.251,0.103	0.046,0.012,0.0	0.137
SE.Agps.3.62649251.62649494.62648446.62648664.62666947.62667037	0.00196962	0.338,0.17,0.17	0.051,0.063,0.15	0.138
SE.Atad3a.5.173204970.173205204.173204658.173204760.173205818.173205895	0.0123358	0.255,0.129,0.229	0.068,0.057,0.075	0.138
MXE.Pam.9.111132205.111132520.111141932.111142062.111119814.111119886.111151282.111151399	7.77388e-06	0.298,0.3,0.333	0.055,0.211,0.251	0.138
A5SS.Sidt2.8.50234002.50234212.50234140.50234212.50233796.50233902	4.67506e-10	0.189,0.041,0.247	0.015,0.025,0.022	0.138
SE.Btaf1.1.255622641.255622789.255621452.255621627.255623230.255623434	2.35619e-05	0.249,0.198,0.152	0.065,0.041,0.077	0.139
SE.Cnot2.7.59575090.59575313.59566763.59566886.59587241.59587385	0.000384418	0.188,0.362,0.197	0.124,0.078,0.128	0.139
SE.Gpatch8.10.90454663.90454708.90452565.90452633.90473061.90473134	0.0112066	0.153,0.238,0.1	0.021,0.052,0.0	0.139
SE.Rps24.16.761666.761682.760364.760382.762005.762075	1.53918e-13	0.959,0.98,0.98	0.834,0.832,0.832	0.14
MXE.Arhgef10l.5.159081654.159081732.159082092.159082199.159080567.159080747.159084120.159084229	0.0496552	0.574,0.582,0.523	0.403,0.491,0.364	0.14
SE.Lrrfip1.9.98243245.98243287.98240694.98240820.98245064.98245235	0.000156806	0.447,0.351,0.431	0.223,0.245,0.337	0.141
A5SS.Cep85l.20.34581845.34582025.34581917.34582025.34579127.34579356	0.00827667	0.107,0.211,0.224	0.0,0.12,0.0	0.141
A3SS.Pld2.10.57172012.57172146.57172062.57172146.57166155.57166305	0.0183925	0.093,0.256,0.197	0.0,0.091,0.032	0.141
SE.Eln.12.24995447.24995681.24994166.24994202.24995898.24996033	3.74625e-08	0.88,0.864,0.841	0.68,0.686,0.792	0.142
SE.Mcts1.X.124895774.124895927.124894465.124894643.124896410.124896508	1.60166e-06	0.951,0.943,0.925	0.878,0.766,0.75	0.142
SE.Svil.17.55270567.55270615.55263545.55263683.55273924.55274048	4.0147e-06	0.233,0.29,0.229	0.142,0.051,0.133	0.142
SE.Fn1.9.78911969.78912075.78911608.78911715.78912688.78912778	4.40927e-06	0.817,0.834,0.85	0.63,0.734,0.711	0.142
A3SS.Slc12a2.18.52939812.52940015.52939906.52940015.52938608.52938719	8.15859e-10	0.055,0.177,0.208	0.0,0.015,0.0	0.142
SE.Smc5.1.240990975.240991158.240990630.240990675.240993634.240993760	5.51408e-05	0.105,0.243,0.237	0.032,0.023,0.1	0.143
SE.Pdlim7.17.9659208.9659225.9658263.9658294.9659478.9659615	0.0102823	0.944,0.955,0.966	0.801,0.678,0.957	0.143
SE.Slc12a2.18.52956221.52956420.52955298.52955410.52957387.52957528	1.69951e-12	0.06,0.238,0.16	0.021,0.005,0.0	0.144
SE.Camk2d.2.231074178.231074238.231063261.231063299.231078899.231078948	2.48544e-12	0.098,0.214,0.141	0.01,0.0,0.011	0.144
MXE.Ss18.18.6029646.6029769.6030769.6030862.6026793.6026927.6033908.6034013	7.58888e-09	0.262,0.271,0.167	0.045,0.103,0.119	0.144
SE.Slc44a2.8.22383753.22383925.22383221.22383306.22384523.22385864	4.0147e-06	0.27,0.222,0.263	0.091,0.141,0.088	0.145
MXE.Sbno2.7.12504408.12504647.12504869.12504966.12501641.12501803.12505139.12505294	2.64703e-05	0.105,0.263,0.183	0.034,0.044,0.037	0.145
MXE.Tbcd.10.110690584.110690679.110727631.110727788.110687082.110687157.110736700.110736758	0.00812662	0.637,0.63,0.633	0.498,0.416,0.552	0.145
A5SS.Zfp496.10.45849119.45849547.45849412.45849547.45848668.45848846	0.0132457	0.95,0.89,1.0	0.712,0.859,0.835	0.145
A3SS.Kdm3a.4.99515306.99515555.99515306.99515434.99515709.99515805	0.000193448	0.05,0.234,0.235	0.009,0.055,0.019	0.145
SE.Capn7.16.7437803.7437958.7435633.7435888.7438794.7438903	0.0274005	0.222,0.328,0.269	0.054,0.178,0.149	0.146
A3SS.Stam.17.81238138.81238368.81238277.81238368.81235291.81235438	1.08915e-10	0.174,0.202,0.212	0.084,0.024,0.041	0.146
A3SS.Nt5dc1.20.41191709.41191794.41191709.41191791.41193200.41193280	0.0152392	1.0,0.946,0.969	0.708,0.86,0.909	0.146
SE.Myo9b.16.19728262.19728404.19727732.19727814.19728833.19728923	6.07417e-08	0.214,0.205,0.163	0.044,0.058,0.04	0.147
SE.Sp140.9.92656028.92656191.92655120.92655168.92657390.92657579	0.0210955	0.258,0.248,0.351	0.116,0.165,0.134	0.147
MXE.Col5a1.3.6568350.6568463.6570885.6570954.6567392.6567648.6574346.6574580	0	0.886,0.925,0.891	0.711,0.772,0.779	0.147
MXE.Rbpms.16.62056602.62056753.62086654.62086788.61954589.61954944.62089339.62089579	3.11862e-05	0.69,0.74,0.721	0.544,0.578,0.587	0.147
MXE.Atrn.3.123536333.123536521.123550304.123550366.123534680.123534759.123555919.123555998	0.000103399	0.917,0.877,0.917	0.697,0.767,0.805	0.147
MXE.Camk2g.15.3981744.3981777.3983819.3983888.3974330.3974374.3985004.3985049	0.0209185	0.104,0.193,0.145	0.0,0.0,0.0	0.147
MXE.Plod2.8.100024549.100024640.100025701.100025863.100024221.100024319.100026769.100026871	0.0349217	0.164,0.278,0.0	0.0,0.0,0.0	0.147
MXE.Nexn.2.257468601.257468643.257473210.257473402.257467154.257467343.257474706.257474779	0.0458461	0.394,0.519,0.375	0.185,0.346,0.316	0.147
A3SS.Nvl.13.99457982.99458209.99457982.99458177.99459390.99459436	0.0317214	1.0,1.0,0.932	0.682,0.908,0.901	0.147
SE.Sidt2.8.50238041.50238104.50237208.50237327.50238280.50238352	1.58027e-09	0.205,0.196,0.307	0.057,0.076,0.131	0.148
SE.Agap3.4.7225050.7225276.7222084.7222177.7225682.7225841	3.89347e-09	0.203,0.155,0.199	0.016,0.035,0.061	0.148
MXE.Myo9b.16.19728262.19728404.19728833.19728923.19727732.19727814.19732535.19732575	1.463e-06	0.25,0.186,0.187	0.063,0.069,0.048	0.148
A5SS.Kif1b.5.166059930.166060125.166060052.166060125.166042585.166042679	4.16769e-10	0.122,0.236,0.193	0.035,0.037,0.036	0.148
A5SS.Tada1.13.84591510.84591660.84591510.84591602.84591778.84591844	0.00924895	0.265,0.136,0.174	0.049,0.083,0.0	0.148
A3SS.Rrp12.1.261121244.261121475.261121244.261121399.261121744.261121907	0.00423072	0.036,0.08,0.327	0.0,0.0,0.0	0.148
SE.Flnb.15.18780302.18780341.18779402.18779505.18783400.18783648	0.00860328	0.917,0.924,0.945	0.664,0.786,0.89	0.149
MXE.Fam45a.1.282190948.282191006.282194099.282194179.282188109.282188188.282197073.282197222	1.71442e-05	0.101,0.18,0.242	0.026,0.026,0.024	0.149
SE.Ndrg4.19.9768941.9768980.9766438.9768194.9770211.9770263	0.00477377	0.284,0.24,0.149	0.059,0.086,0.078	0.15
MXE.Armcx2.X.105620854.105620954.105621467.105621705.105620512.105620578.105622098.105622156	0.00175401	0.428,0.394,0.417	0.265,0.255,0.268	0.15
A5SS.RGD1308134.10.56847659.56847873.56847778.56847873.56847127.56847229	0.0352966	0.312,0.115,0.146	0.03,0.009,0.083	0.15
A3SS.E2f5.2.88354476.88354612.88354476.88354541.88356106.88356150	6.88078e-05	0.203,0.179,0.127	0.042,0.018,0.0	0.15
A5SS.Rhoc.2.207272147.207272244.207272147.207272214.207275317.207275481	5.86679e-06	0.144,0.187,0.142	0.0,0.021,0.0	0.151
A5SS.Jmjd1c.20.22759934.22760109.22759969.22760109.22758550.22758727	2.34339e-05	0.23,0.157,0.205	0.033,0.063,0.044	0.151
SE.Myl6.7.2907014.2907059.2906136.2906318.2907350.2907413	9.74638e-10	0.529,0.546,0.549	0.405,0.39,0.372	0.152
MXE.Myo9b.16.19728262.19728404.19728833.19728923.19727732.19727814.19730695.19730809	4.0367e-06	0.245,0.232,0.161	0.063,0.065,0.054	0.152
MXE.Usp14.18.1204575.1204680.1208831.1208864.1203073.1203177.1210567.1210713	0.008141	0.614,0.479,0.483	0.359,0.368,0.394	0.152
A5SS.Wls.2.266426183.266426406.266426183.266426302.266430155.266431216	0.000276723	0.735,0.717,0.726	0.567,0.58,0.574	0.152
A3SS.Arrdc3.2.8740946.8741139.8740984.8741139.8740551.8740714	1.81218e-07	0.186,0.177,0.283	0.047,0.089,0.053	0.152
A3SS.Zfp496.10.45849412.45849547.45849412.45849499.45849845.45849951	0.00380528	0.965,1.0,0.924	0.766,0.771,0.895	0.152
A3SS.Klc1.6.136357992.136358154.136358016.136358154.136356381.136356490	0.00383082	0.67,0.563,0.562	0.409,0.472,0.459	0.152
SE.Akap2.5.74972092.74972271.74954383.74956829.74981645.74982401	5.95516e-05	0.594,0.559,0.583	0.473,0.41,0.395	0.153
SE.Supt6h.10.65499294.65499381.65496451.65496698.65507191.65507581	0.00723187	0.309,0.295,0.303	0.164,0.138,0.146	0.153
RI.Tor1aip2.13.73708814.73709045.73708814.73708912.73708985.73709045	6.76423e-07	0.228,0.285,0.219	0.091,0.084,0.097	0.153
SE.Ints6.15.45861878.45862089.45858607.45859868.45862362.45862456	1.97502e-08	0.214,0.216,0.104	0.0,0.042,0.03	0.154
A5SS.Ammecr1l.18.24554710.24554877.24554710.24554825.24555805.24555896	9.32988e-06	0.172,0.179,0.147	0.016,0.0,0.019	0.154
SE.Clstn1.5.166594594.166594651.166591700.166591863.166596069.166596227	0	0.959,0.965,0.963	0.797,0.751,0.874	0.155
SE.Dyrk1a.11.34898889.34899047.34879057.34879143.34922139.34922336	1.06728e-08	0.14,0.237,0.167	0.016,0.027,0.035	0.155
SE.Ppfibp1.4.181412641.181412674.181412020.181412192.181414725.181414873	6.65253e-08	0.895,0.891,0.915	0.718,0.696,0.822	0.155
SE.Lrrc49.8.65579669.65579772.65576671.65576875.65584499.65584587	0.00224135	1.0,0.815,1.0	0.705,0.778,0.867	0.155
SE.LOC361646.1.197187075.197187207.197183956.197184221.197203622.197203792	0.00263728	1.0,1.0,0.938	0.72,0.818,0.934	0.155
SE.Pradc1.4.117232180.117232281.117231602.117231712.117234687.117234928	0.0247721	1.0,0.939,0.925	0.687,0.851,0.861	0.155
SE.Arhgef11.2.187098702.187098822.187097448.187097805.187099726.187099953	0.0350098	1.0,1.0,1.0	0.743,1.0,0.793	0.155
MXE.Irf1.10.39112946.39113173.39113259.39113392.39110709.39110801.39113567.39113690	0.0353675	0.517,0.596,0.608	0.426,0.491,0.339	0.155
A5SS.Tmem126a.1.156283127.156283329.156283127.156283193.156284940.156285036	0.0102943	0.381,0.202,0.325	0.109,0.118,0.216	0.155
A3SS.Parn.10.1433279.1433349.1433279.1433336.1434278.1434356	0.00107779	0.202,0.191,0.125	0.019,0.014,0.021	0.155
SE.Eln.12.24995591.24995615.24994166.24994202.24995898.24996033	8.52639e-10	0.84,0.83,0.797	0.659,0.62,0.72	0.156
SE.Phldb2.11.57442365.57442594.57430886.57431024.57449835.57449991	0.00216452	0.571,0.59,0.578	0.451,0.434,0.387	0.156
MXE.Pan3.12.9256475.9256591.9297690.9297852.9240562.9240810.9309986.9310057	0.0338754	0.931,0.847,0.872	0.74,0.788,0.655	0.156
A3SS.Celf1.3.79831720.79831796.79831732.79831796.79829762.79829924	0.00223496	0.833,0.945,0.917	0.707,0.721,0.796	0.157
RI.Nvl.13.99461875.99462108.99461875.99461972.99462060.99462108	0.000687806	0.081,0.278,0.168	0.056,0.0,0.0	0.157
SE.Adgrl2.2.258828081.258828120.258825483.258825667.258828859.258829045	8.92686e-08	0.907,0.895,0.964	0.727,0.742,0.823	0.158
MXE.Jmjd1c.20.22784470.22786641.22796062.22796168.22780280.22780482.22822065.22822179	0.000163086	0.489,0.571,0.542	0.382,0.336,0.41	0.158
MXE.Zmym2.15.37182106.37182319.37190895.37190967.37181153.37181319.37191948.37192099	0.000200117	0.796,0.85,0.806	0.649,0.68,0.648	0.158
A3SS.Med25.1.100881111.100881336.100881111.100881232.100881508.100881607	0.00383082	0.121,0.221,0.223	0.036,0.054,0.0	0.158
RI.Cdan1.3.112674601.112674826.112674601.112674680.112674759.112674826	0.0344675	0.357,0.0,0.298	0.03,0.133,0.019	0.158
SE.Rps6kb2.1.219409506.219409611.219408812.219408870.219410221.219410369	0.00153163	0.15,0.236,0.163	0.051,0.02,0.0	0.159
SE.Zfp512b.3.177086988.177087146.177086586.177086715.177087383.177087509	0.00398516	1.0,0.834,1.0	0.831,0.798,0.729	0.159
RI.Katnb1.19.10340949.10341185.10340949.10341024.10341097.10341185	0.000303689	0.262,0.051,0.241	0.01,0.047,0.021	0.159
SE.Actn1.6.103379204.103379379.103378007.103378166.103379819.103379900	0	0.268,0.097,0.228	0.022,0.022,0.069	0.16
SE.Clic2.20.304653.304860.295249.295605.304984.305110	0.000469447	1.0,1.0,1.0	0.958,0.858,0.703	0.16
SE.Lrrfip1.9.98243215.98243287.98240694.98240820.98245064.98245235	0.000534423	0.717,0.641,0.72	0.449,0.533,0.615	0.16
MXE.Sp140.9.92656028.92656191.92657390.92657432.92655120.92655168.92662115.92662225	0.00102661	0.232,0.244,0.343	0.09,0.142,0.107	0.16
A5SS.Mrpl17.1.170652832.170653141.170653089.170653141.170652293.170652651	0	0.902,0.888,0.935	0.749,0.745,0.752	0.16
A5SS.Jmjd1c.20.22771888.22772112.22772022.22772112.22771350.22771478	2.5816e-09	0.139,0.236,0.233	0.032,0.069,0.028	0.16
SE.Tead1.1.177654013.177654076.177651556.177651621.177654165.177654228	0.00291024	1.0,0.836,0.961	0.771,0.775,0.767	0.161
SE.Tmem161b.2.12518959.12519102.12517898.12518003.12519745.12519843	0.0156469	0.072,0.411,0.125	0.024,0.079,0.022	0.161
SE.LOC103689961.1.77806353.77806398.77806097.77806172.77806525.77806540	0.0167174	0.904,0.927,0.959	0.627,0.888,0.791	0.161
SE.Ccdc62.12.38066476.38066593.38059238.38059331.38068944.38069053	0.0425489	0.744,1.0,1.0	0.546,0.88,0.834	0.161
MXE.Epb41l2.1.20899101.20899200.20901151.20901274.20897544.20897625.20902808.20903369	0.00890309	0.654,0.775,0.667	0.598,0.48,0.536	0.161
SE.Ippk.17.15626085.15626214.15623618.15623677.15628853.15628943	0.000529338	0.067,0.41,0.084	0.017,0.0,0.058	0.162
SE.Slc22a17.15.33575283.33575387.33572997.33573152.33575476.33575968	0.0200938	1.0,1.0,0.963	0.682,0.889,0.907	0.162
MXE.Rps24.16.760364.760382.761659.761682.759685.759796.762005.762075	1.56419e-10	0.342,0.353,0.301	0.139,0.178,0.193	0.162
MXE.Cdc14b.17.1711425.1711491.1719574.1719721.1709702.1711137.1723405.1723503	0.000404721	0.96,1.0,0.951	0.725,0.846,0.853	0.162
A5SS.Dnase1l1.X.156434817.156435029.156434817.156434833.156435178.156435267	0.0267626	1.0,1.0,0.74	0.797,0.86,0.596	0.162
SE.Atg16l1.9.94896770.94896956.94894863.94894929.94897115.94897202	4.91985e-11	0.125,0.127,0.279	0.006,0.016,0.021	0.163
SE.Spidr.11.89109114.89109261.89108653.89108904.89110771.89110961	2.91525e-11	0.074,0.244,0.174	0.0,0.0,0.0	0.164
SE.Atg16l1.9.94896770.94896960.94894863.94894929.94897115.94897202	4.59085e-11	0.124,0.146,0.286	0.006,0.016,0.041	0.164
MXE.AABR07073181.1.5.155853492.155853543.155853919.155854048.155851503.155851664.155854271.155854523	7.74908e-08	0.425,0.411,0.427	0.254,0.207,0.31	0.164
MXE.Evi5.14.2991064.2991160.3011573.3011669.2988676.2988823.3034568.3038237	0.00196469	0.67,0.628,0.658	0.478,0.522,0.465	0.164
A5SS.Pkm.8.64481171.64481390.64481171.64481211.64489928.64490095	0.000127871	1.0,0.96,1.0	0.897,0.732,0.838	0.164
RI.Hsd17b8.20.3817211.3817649.3817211.3817403.3817574.3817649	0.000948598	0.337,0.342,0.358	0.235,0.137,0.173	0.164
SE.Ubr5.7.76827973.76828183.76825846.76825998.76829705.76829832	1.87986e-12	0.182,0.151,0.269	0.047,0.029,0.03	0.165
SE.Ctnnd1.3.72026302.72026484.72024076.72024148.72052711.72052990	1.95756e-06	0.981,0.908,0.902	0.771,0.753,0.771	0.165
SE.Sfxn1.17.11050194.11050265.11049429.11049479.11057626.11057676	0.0018822	0.17,0.338,0.027	0.004,0.007,0.03	0.165
A5SS.Styx.15.19699508.19699618.19699508.19699562.19701525.19701623	9.98197e-11	0.113,0.132,0.283	0.01,0.011,0.011	0.165
A3SS.Ssb.3.56101181.56101331.56101214.56101331.56100887.56101083	0.000806654	0.718,0.636,0.673	0.511,0.544,0.478	0.165
SE.LOC687679.4.118171609.118171662.118167293.118167395.118172481.118172606	0.000213721	0.881,1.0,1.0	0.85,0.788,0.746	0.166
A5SS.Esf1.3.133232123.133232322.133232235.133232322.133229614.133230292	0.00237376	0.889,1.0,0.947	0.701,0.738,0.899	0.166
A5SS.Mtmr12.2.62267107.62267238.62267107.62267210.62268629.62268720	0.00349729	1.0,0.92,0.955	0.869,0.839,0.67	0.166
A3SS.Eif2b4.6.26547176.26547365.26547321.26547365.26546923.26546954	0.000819224	0.202,0.238,0.229	0.104,0.03,0.036	0.166
SE.Bfar.10.1469210.1469320.1464764.1464856.1480443.1480778	0.00850538	0.153,0.394,0.161	0.037,0.1,0.07	0.167
SE.Tmco6.18.29581663.29581786.29581398.29581514.29582087.29582192	0.0207325	1.0,1.0,0.904	0.858,0.817,0.728	0.167
MXE.Son.11.31830363.31830462.31832510.31832650.31829949.31830066.31833247.31833327	0.0348425	0.214,0.391,0.31	0.057,0.218,0.139	0.167
A5SS.Serpinb6.17.32190800.32190897.32190800.32190848.32195243.32195418	4.83983e-06	0.545,0.521,0.519	0.371,0.361,0.353	0.167
MXE.Eif5b.9.44702005.44702147.44706244.44706376.44700958.44701026.44706865.44707048	0.000362983	0.251,0.369,0.335	0.125,0.164,0.161	0.168
MXE.Spata7.6.122607275.122607346.122609714.122609810.122603268.122603433.122613986.122614034	0.00219863	0.121,0.299,0.243	0.046,0.046,0.067	0.168
A5SS.Osmr.2.56133681.56133928.56133795.56133928.56132977.56133129	2.97974e-09	0.13,0.311,0.141	0.026,0.028,0.024	0.168
A5SS.Card19.17.15845930.15846176.15845930.15846002.15854026.15854179	0.0312136	0.352,0.204,0.307	0.091,0.13,0.139	0.168
A3SS.Pxdc1.17.30983637.30983827.30983673.30983827.30982692.30982810	0.0313355	0.189,0.32,0.324	0.102,0.112,0.115	0.168
A5SS.Slc20a1.3.121730916.121731162.121730916.121731013.121733975.121734095	8.32729e-11	0.169,0.188,0.28	0.034,0.048,0.048	0.169
A5SS.Tbce.17.54023723.54023887.54023723.54023877.54025658.54025727	0.0458571	0.161,0.257,0.476	0.073,0.128,0.185	0.169
SE.Ubap2.5.57600565.57600602.57582310.57582388.57607626.57607763	0.000404228	0.226,0.133,0.214	0.0,0.062,0.0	0.17
SE.Prkd1.6.71078452.71078700.71078255.71078362.71079788.71079861	0.00105775	0.084,0.387,0.133	0.095,0.0,0.0	0.17
A5SS.Sfswap.12.30767304.30767470.30767388.30767470.30761722.30761953	0.000623385	0.966,1.0,1.0	0.961,0.756,0.738	0.17
A3SS.Rbbp4.5.147512944.147513109.147512944.147513090.147534508.147534656	0.00592469	0.023,0.296,0.281	0.0,0.087,0.0	0.171
A3SS.Strn4.1.78756333.78756449.78756354.78756449.78755893.78756007	0.0178915	0.21,0.355,0.246	0.086,0.116,0.097	0.171
MXE.Tead1.1.177654013.177654076.177654165.177654228.177651556.177651621.177667421.177667433	0.034261	0.978,0.925,0.711	0.703,0.732,0.663	0.172
SE.Npdc1.3.2627751.2627898.2625014.2625190.2628945.2629086	0.000152674	0.975,0.881,1.0	0.65,0.819,0.868	0.173
MXE.Fam45a.1.282190943.282191006.282194099.282194179.282188109.282188188.282197073.282197222	6.00039e-08	0.233,0.145,0.213	0.013,0.013,0.045	0.173
A5SS.Sat1.X.43627261.43627502.43627261.43627345.43628776.43628878	0	0.244,0.247,0.271	0.061,0.096,0.085	0.173
RI.Plekhg2.1.85394926.85395132.85394926.85394960.85395115.85395132	1.12125e-05	0.158,0.28,0.175	0.044,0.039,0.01	0.173
SE.Cfap100.4.122317631.122317767.122316725.122316931.122319908.122320060	0.00065	0.887,1.0,1.0	0.803,0.807,0.755	0.174
SE.Smtn.14.83756781.83756976.83755141.83755445.83758453.83758618	4.71869e-09	0.186,0.171,0.334	0.063,0.07,0.033	0.175
SE.Ggnbp2.10.72171307.72171433.72171106.72171220.72175212.72175311	8.35914e-08	0.349,0.25,0.339	0.1,0.1,0.212	0.175
RI.Tsr1.10.61756055.61756357.61756055.61756196.61756282.61756357	0.0374441	0.079,0.263,0.401	0.081,0.055,0.082	0.175
SE.Ppp1r12a.7.51411026.51411057.51410269.51410320.51412658.51412706	0	0.168,0.172,0.19	0.0,0.002,0.0	0.176
SE.Wisp2.3.160211891.160212108.160208409.160208502.160215416.160215671	8.45465e-13	0.839,0.916,0.851	0.742,0.663,0.673	0.176
SE.Naglu.10.88981736.88981956.88981408.88981555.88983204.88983461	0.00061948	1.0,1.0,0.938	0.733,0.791,0.886	0.176
SE.Klc1.6.136363124.136363257.136362394.136362539.136364300.136364431	0.0211642	0.869,1.0,0.914	0.844,0.643,0.769	0.176
SE.Fgfr1.16.71282781.71282825.71280955.71281045.71306208.71306391	1.00921e-06	0.32,0.3,0.258	0.105,0.064,0.178	0.177
A5SS.Hnrnph1.10.35877226.35877325.35877226.35877286.35878028.35878121	1.0817e-11	0.984,0.935,0.959	0.764,0.806,0.778	0.177
SE.Btaf1.1.255622597.255622789.255621452.255621627.255623230.255623434	5.47936e-06	0.336,0.244,0.198	0.091,0.075,0.078	0.178
SE.Cox19.12.17396641.17396790.17395623.17395733.17398243.17398355	0.00217237	0.235,0.4,0.321	0.094,0.158,0.17	0.178
A5SS.Phc2.5.146922275.146922478.146922275.146922383.146923962.146924092	0.000163362	0.922,0.813,0.918	0.736,0.788,0.595	0.178
SE.Smtn.14.83756781.83756984.83755141.83755445.83758453.83758618	1.53326e-09	0.193,0.184,0.336	0.062,0.075,0.039	0.179
SE.Cog1.10.102179816.102179854.102179310.102179389.102180377.102180569	0.00093828	0.129,0.333,0.171	0.04,0.029,0.026	0.179
MXE.Prdm5.4.96767057.96767151.96787389.96787475.96764467.96764628.96810024.96812263	2.71555e-05	0.892,0.876,0.904	0.798,0.607,0.729	0.179
MXE.Sacs.15.41488261.41488412.41495138.41495224.41458767.41459227.41498105.41498217	0.00283254	0.275,0.311,0.25	0.183,0.067,0.05	0.179
MXE.Uso1.14.17374312.17374430.17378453.17378574.17372904.17373120.17380014.17380178	0.0247528	0.152,0.345,0.228	0.058,0.0,0.129	0.179
A5SS.Spata5.2.124166617.124166838.124166617.124166741.124168789.124169045	2.32607e-10	0.229,0.195,0.241	0.0,0.044,0.084	0.179
A5SS.Eny2.7.83348693.83348829.83348693.83348757.83350099.83350176	1.20365e-05	0.697,0.775,0.753	0.563,0.558,0.567	0.179
SE.Senp6.8.87516189.87516210.87511460.87511565.87521065.87521136	3.76903e-05	0.921,0.847,0.857	0.58,0.765,0.74	0.18
SE.Cox19.12.17396541.17396790.17395623.17395733.17398243.17398355	0.000787873	0.304,0.422,0.346	0.132,0.18,0.221	0.18
SE.Gls2.7.2619632.2619722.2619164.2619296.2619895.2619957	0.0274897	0.471,0.314,0.433	0.202,0.332,0.143	0.18
A3SS.Cdk9.3.11743912.11744129.11743912.11744061.11744218.11744390	2.04672e-12	0.179,0.221,0.197	0.017,0.02,0.021	0.18
RI.Srsf7.6.2883405.2883639.2883405.2883483.2883564.2883639	0	0.133,0.24,0.226	0.017,0.021,0.021	0.18
SE.Macf1.5.141053235.141053253.141050182.141050300.141054741.141054816	0.0137212	0.68,0.729,0.76	0.432,0.55,0.643	0.181
MXE.Map4k4.9.46756870.46757032.46759177.46759402.46755996.46756119.46760210.46760317	0.031443	0.526,0.637,0.411	0.355,0.346,0.329	0.181
A3SS.Apc.18.27084660.27085039.27084963.27085039.27082217.27082316	0.0344997	0.812,1.0,0.975	0.811,0.746,0.686	0.181
SE.Ppp2r3c.6.76079085.76079287.76075220.76075348.76079637.76079664	0.000104626	1.0,1.0,1.0	0.788,0.904,0.762	0.182
A3SS.Eif4ebp3.18.29406094.29406251.29406136.29406251.29402254.29402405	0.0332864	0.905,0.945,0.924	0.854,0.671,0.703	0.182
RI.Mfsd10.14.81365109.81365348.81365109.81365163.81365257.81365348	6.37562e-06	0.138,0.131,0.31	0.009,0.008,0.017	0.182
SE.Os9.7.70381570.70381735.70381292.70381405.70382581.70382771	8.21812e-13	0.288,0.318,0.321	0.102,0.122,0.155	0.183
RI.Ttll4.9.81947987.81948216.81947987.81948050.81948133.81948216	0.0476497	0.399,0.098,0.205	0.064,0.09,0.0	0.183
SE.Esyt2.6.144230828.144230891.144225531.144225627.144234123.144234198	0	0.196,0.199,0.207	0.007,0.013,0.029	0.184
MXE.Map4k4.9.46756870.46757032.46759171.46759402.46755996.46756119.46760210.46760317	0.0151074	0.483,0.6,0.382	0.308,0.308,0.296	0.184
A5SS.Wdr26.13.99531658.99531763.99531706.99531763.99526204.99526341	6.99367e-05	0.642,0.624,0.628	0.424,0.504,0.415	0.184
SE.Myh11.10.855644.855683.852888.853061.858563.858894	0	0.234,0.218,0.233	0.033,0.016,0.08	0.185
SE.Fgfr2.1.200672144.200672411.200657917.200658087.200692382.200692684	0.00846291	0.52,0.434,0.559	0.319,0.335,0.303	0.185
MXE.Cdc14b.17.1711425.1711491.1715583.1715700.1709702.1711137.1723405.1723503	0.00225679	0.95,1.0,0.889	0.604,0.851,0.829	0.185
A3SS.Haus8.16.19660100.19660196.19660100.19660193.19661094.19661167	0.0146563	0.953,0.894,0.946	0.718,0.788,0.733	0.185
RI.Thoc6.10.12989483.12989704.12989483.12989613.12989697.12989704	2.33635e-09	0.279,0.213,0.184	0.083,0.026,0.013	0.185
SE.Trit1.5.140753129.140753239.140750322.140750400.140753532.140753650	3.91303e-06	0.967,1.0,0.973	0.758,0.801,0.822	0.186
A5SS.Arhgef11.2.187094687.187094850.187094687.187094778.187095457.187095583	0.0206263	0.211,0.31,0.273	0.08,0.06,0.095	0.186
A5SS.Smim8.5.50239078.50239431.50239372.50239431.50232912.50233069	0.0476601	1.0,1.0,0.716	0.694,0.771,0.694	0.186
A3SS.Sp140.9.92663495.92663738.92663594.92663738.92663328.92663403	5.66833e-06	0.29,0.271,0.288	0.071,0.06,0.154	0.188
SE.Usp28.8.53329011.53329164.53327556.53327705.53329394.53329522	0.00233048	0.133,0.407,0.124	0.051,0.047,0.0	0.189
MXE.Prickle2.4.124301590.124301794.124303986.124304124.124298279.124298466.124307217.124307331	0.0135979	0.625,0.661,0.619	0.549,0.406,0.382	0.189
SE.Hnrnpa2b1.4.81238542.81238662.81238218.81238341.81239316.81239379	3.37607e-05	0.804,0.71,0.829	0.579,0.551,0.643	0.19
SE.Supt6h.10.65499212.65499381.65496451.65496698.65507191.65507581	0.000259192	0.551,0.465,0.512	0.295,0.297,0.366	0.19
SE.Trim37.10.74516521.74516644.74511720.74512029.74517373.74517563	0.0274005	0.908,0.831,0.915	0.607,0.673,0.805	0.19
A5SS.Sbno2.7.12504869.12505053.12504869.12504966.12505139.12505294	2.29297e-08	0.181,0.287,0.218	0.032,0.05,0.034	0.19
A5SS.Txndc11.10.4583977.4584207.4583977.4584112.4586518.4586616	0.000366443	0.198,0.338,0.173	0.017,0.086,0.035	0.19
SE.Sik3.8.50330428.50330633.50310404.50310535.50420734.50420851	8.5552e-08	0.091,0.297,0.277	0.04,0.024,0.029	0.191
SE.Nmral1.10.11053059.11053250.11052241.11052491.11054876.11055158	5.10037e-05	1.0,1.0,1.0	0.76,0.818,0.845	0.192
MXE.Tceanc2.5.126754689.126754883.126771141.126771283.126746171.126747143.126781938.126782078	0.00566243	0.67,0.629,0.657	0.437,0.532,0.412	0.192
SE.Eln.12.25014123.25014254.25013473.25013599.25016287.25016419	0	0.958,0.957,0.963	0.645,0.843,0.812	0.193
SE.Ss18.18.6030769.6030862.6029646.6029769.6033908.6034013	2.63137e-10	0.382,0.371,0.296	0.135,0.159,0.177	0.193
A5SS.Azin1.7.77348891.77349140.77348925.77349140.77345645.77347972	0	0.158,0.238,0.215	0.014,0.017,0.0	0.193
A3SS.Ripk3.15.34473904.34474115.34473904.34474048.34474274.34474379	5.82159e-08	0.197,0.157,0.272	0.01,0.014,0.019	0.194
MXE.Zbtb20.11.62127984.62128148.62164419.62164519.62067555.62067655.62172314.62172354	0.00045483	0.09,0.325,0.252	0.0,0.081,0.0	0.195
MXE.Grb14.3.50954584.50954695.50958083.50958167.50954286.50954448.50961184.50961259	2.88629e-06	0.213,0.187,0.187	0.0,0.0,0.0	0.196
MXE.Arih1.8.64205385.64205441.64212049.64212224.64192046.64192113.64214852.64214997	8.24218e-06	0.168,0.271,0.364	0.0,0.126,0.09	0.196
SE.Tom1l2.10.46611357.46611420.46605408.46605468.46613744.46613820	4.79975e-05	0.21,0.309,0.278	0.076,0.08,0.05	0.197
MXE.Akap12.1.40861514.40861629.40899151.40903958.40816106.40816435.40905581.40906581	0	0.2,0.251,0.238	0.043,0.027,0.029	0.197
A5SS.Diaph1.18.31038819.31039039.31038975.31039039.31037542.31037682	1.35359e-07	0.1,0.331,0.213	0.0,0.037,0.017	0.197
SE.Nbeal1.9.67003904.67003991.66995552.66995647.67006110.67006194	1.83046e-11	0.263,0.306,0.249	0.056,0.073,0.096	0.198
MXE.Svil.17.55304820.55304912.55307241.55307299.55300792.55300850.55345723.55346279	7.72601e-07	0.28,0.248,0.326	0.084,0.05,0.125	0.198
A3SS.Elf2.2.140322464.140322638.140322464.140322602.140324465.140324567	0.00101462	0.445,0.398,0.324	0.222,0.183,0.168	0.198
SE.Nhlrc3.2.142686107.142686252.142685417.142685551.142686444.142686577	8.85827e-06	1.0,1.0,1.0	0.753,0.724,0.925	0.199
SE.Ecm1.2.197857143.197857518.197856495.197856716.197857790.197858110	0	0.979,1.0,1.0	0.807,0.758,0.813	0.2
MXE.Sacs.15.41488261.41488412.41493484.41493569.41458767.41459227.41495138.41495224	0.00329783	0.306,0.34,0.302	0.214,0.076,0.058	0.2
SE.Tmem65.7.98681176.98681283.98679945.98680013.98682811.98682856	0	0.196,0.204,0.279	0.028,0.022,0.027	0.201
SE.Svil.17.55292257.55292341.55288179.55288214.55297975.55298582	0.00175293	0.284,0.358,0.449	0.107,0.188,0.191	0.202
SE.Adamtsl4.2.197810183.197810401.197809254.197809391.197810503.197811101	0.00634868	0.95,0.962,0.837	0.616,0.812,0.714	0.202
A5SS.Srsf5.6.104611025.104611274.104611025.104611145.104612018.104612163	1.12078e-12	0.434,0.391,0.412	0.233,0.218,0.181	0.202
A5SS.Rn50_10_0892.1.10.89236257.89236599.89236257.89236497.89237192.89237396	9.6377e-07	0.107,0.287,0.277	0.03,0.016,0.018	0.202
A3SS.AABR07035787.1.12.22470573.22470697.22470594.22470697.22470380.22470470	0.0108656	0.852,0.918,0.723	0.653,0.634,0.601	0.202
MXE.Tmem175.14.2088692.2088744.2090936.2091031.2088421.2088457.2091821.2091860	0.023645	0.377,0.412,0.393	0.131,0.16,0.28	0.204
A5SS.Rrp12.1.261133502.261133675.261133569.261133675.261133265.261133382	2.39726e-08	0.23,0.146,0.249	0.013,0.0,0.0	0.204
A3SS.Col4a5.X.112964634.112964811.112964677.112964811.112956286.112956472	0.000120367	0.223,0.336,0.27	0.111,0.055,0.051	0.204
A3SS.Il17rc.4.145436552.145436714.145436668.145436714.145435692.145435743	0.000303706	0.292,0.359,0.26	0.094,0.09,0.116	0.204
SE.Usp32.10.72344654.72344863.72344489.72344571.72345779.72345934	5.92585e-07	0.16,0.336,0.188	0.037,0.022,0.01	0.205
SE.Atp9b.18.77346013.77346046.77344196.77345263.77347962.77348091	0.00729869	0.441,0.074,0.252	0.051,0.079,0.022	0.205
SE.Mybl1.5.9310670.9310850.9310139.9310244.9312519.9315114	0.0183457	0.571,0.653,0.781	0.415,0.488,0.486	0.205
SE.Dcaf6.13.83595056.83595098.83590242.83590381.83601156.83601478	6.77171e-09	0.222,0.229,0.267	0.019,0.057,0.025	0.206
A3SS.Rpl22l1.2.115364040.115364225.115364103.115364225.115363873.115363963	0	0.237,0.282,0.32	0.071,0.068,0.083	0.206
RI.Hnrnpm.7.18536418.18536610.18536418.18536454.18536571.18536610	4.30911e-05	0.348,0.536,0.363	0.252,0.186,0.19	0.206
SE.Eml1.6.132422176.132422227.132421355.132421384.132425311.132425439	0	0.217,0.296,0.213	0.035,0.015,0.055	0.207
MXE.Zbtb20.11.62172314.62172354.62338571.62338619.62067555.62067655.62451075.62451149	1.36077e-05	0.246,0.245,0.273	0.0,0.032,0.112	0.207
SE.Srsf7.6.2884237.2884344.2883405.2883639.2884524.2884701	0	0.283,0.207,0.291	0.026,0.043,0.085	0.209
SE.Pam.9.111132205.111132388.111119784.111119886.111141932.111142062	4.35674e-06	0.393,0.401,0.456	0.055,0.253,0.316	0.209
MXE.Slc7a5.19.54701306.54701412.54710363.54710501.54700424.54700469.54721959.54722563	0.0019157	0.518,0.728,0.641	0.401,0.422,0.437	0.209
SE.Dysf.4.115789928.115789967.115780480.115780563.115791198.115791314	6.19357e-05	0.772,0.815,0.709	0.513,0.552,0.602	0.21
SE.Mybl1.5.9310674.9310850.9310139.9310244.9312519.9315114	0.0221258	0.508,0.61,0.73	0.369,0.419,0.429	0.21
SE.Kif1c.10.57324228.57324348.57322330.57322439.57324568.57324701	2.68875e-12	0.888,0.895,0.863	0.657,0.678,0.676	0.212
SE.Wisp2.3.160211891.160212116.160208409.160208502.160215416.160215671	1.33753e-09	0.766,0.865,0.783	0.649,0.559,0.569	0.212
MXE.Dlg1.11.72199979.72200013.72200683.72200783.72182191.72182233.72204928.72204998	1.54238e-12	0.885,0.991,0.971	0.765,0.746,0.7	0.212
MXE.Tecr.19.24707187.24707232.24707642.24707694.24706996.24707100.24708246.24708297	0.0175208	0.705,0.568,0.785	0.488,0.481,0.452	0.212
A3SS.Arl5b.17.82080579.82080727.82080617.82080727.82079044.82079105	0.0146563	0.981,1.0,0.942	0.841,0.9,0.546	0.212
SE.Kif1c.10.57324242.57324348.57322330.57322439.57324568.57324701	7.29752e-12	0.878,0.887,0.867	0.661,0.666,0.666	0.213
SE.Wisp2.3.160211891.160212059.160208389.160208502.160215416.160215671	1.13563e-09	0.764,0.859,0.787	0.647,0.554,0.569	0.213
SE.Bmp1.15.52179580.52179700.52178048.52178269.52181119.52181300	4.92446e-05	0.404,0.242,0.127	0.04,0.028,0.065	0.213
MXE.Wdr37.17.58012795.58012891.58013165.58013230.58010758.58010855.58017028.58017164	0.0424582	0.707,0.558,0.627	0.37,0.529,0.354	0.213
A3SS.Pced1a.3.122946210.122946410.122946210.122946290.122946936.122947075	0.00115736	0.354,0.25,0.26	0.045,0.149,0.03	0.213
A3SS.Bud31.12.11238093.11238228.11238093.11238190.11239371.11239508	0.00658789	0.752,0.662,0.697	0.455,0.473,0.543	0.213
SE.Ssbp2.2.20555653.20555751.20531359.20531444.20649050.20649110	0.000410947	0.085,0.334,0.357	0.075,0.06,0.0	0.214
A3SS.Tusc2.8.116320618.116320795.116320674.116320795.116318962.116319653	1.33505e-09	0.138,0.274,0.255	0.025,0.0,0.0	0.214
SE.Postn.2.143677495.143677576.143674609.143674655.143680500.143680590	0	0.238,0.238,0.26	0.032,0.027,0.025	0.217
SE.Atxn7.15.12459664.12459828.12442474.12442724.12473281.12473386	0.00252317	0.341,0.361,0.111	0.04,0.024,0.097	0.217
SE.Dlg4.10.56636024.56636189.56627410.56627632.56639193.56639247	0.0155511	1.0,1.0,1.0	0.789,1.0,0.56	0.217
MXE.Ncdn.5.144778203.144778368.144778821.144778891.144777789.144777930.144779171.144779212	0.00198615	0.874,0.869,0.926	0.656,0.67,0.691	0.217
A5SS.Mdm2.7.60742285.60742419.60742334.60742419.60737890.60737965	0	0.229,0.283,0.281	0.041,0.026,0.076	0.217
A5SS.Skil.2.115871970.115872203.115872108.115872203.115868515.115868745	4.65412e-05	0.565,0.733,0.667	0.454,0.443,0.416	0.217
SE.Cnot2.7.59575090.59575148.59566763.59566886.59587241.59587385	0.000713966	0.282,0.545,0.315	0.185,0.119,0.185	0.218
A3SS.Sbno2.7.12509441.12509617.12509537.12509617.12509025.12509123	1.25656e-08	0.185,0.289,0.198	0.0,0.018,0.0	0.218
A3SS.Prdm4.7.23978488.23978682.23978513.23978682.23976669.23976984	2.02906e-05	0.127,0.43,0.158	0.02,0.0,0.042	0.218
A3SS.Trmu.7.126767830.126768003.126767885.126768003.126765311.126765434	0.0243406	0.944,0.891,1.0	0.597,0.859,0.72	0.22
SE.Pkp4.3.45277601.45277698.45277347.45277483.45326813.45326926	0.00745545	0.042,0.558,0.064	0.0,0.0,0.0	0.221
SE.Gls2.7.2619629.2619722.2619164.2619296.2619895.2619976	0.0164627	0.651,0.558,0.583	0.318,0.526,0.285	0.221
SE.Svil.17.55292257.55292338.55288179.55288214.55297975.55298582	0.000220547	0.361,0.393,0.496	0.155,0.173,0.256	0.222
SE.Tmem50b.11.31747068.31747202.31733105.31733245.31752126.31752243	0.000380607	0.459,0.284,0.282	0.046,0.127,0.186	0.222
SE.Atf2.3.60748410.60748589.60744742.60744829.60752746.60752875	0.000643156	0.828,0.709,0.782	0.521,0.54,0.591	0.222
MXE.Gls2.7.2619629.2619873.2619895.2619976.2619164.2619296.2620525.2620602	0.0019157	0.538,0.516,0.448	0.202,0.399,0.236	0.222
A5SS.Dvl1.5.173304201.173304354.173304201.173304279.173304830.173304966	0.0122727	0.591,0.732,0.674	0.482,0.317,0.532	0.222
RI.Plekhj1.7.11785782.11786016.11785782.11785873.11785950.11786016	5.33609e-06	0.417,0.344,0.498	0.153,0.251,0.189	0.222
SE.Ppip5k2.9.111271368.111271542.111268832.111268997.111272718.111272791	2.18677e-05	0.33,0.383,0.409	0.106,0.143,0.204	0.223
SE.Ciart.2.197990123.197990522.197989907.197989983.197991102.197991198	0.0129508	1.0,1.0,1.0	0.814,0.902,0.614	0.223
A5SS.Sorbs1.1.259462867.259463239.259463206.259463239.259459398.259459540	0.035501	0.391,0.379,0.531	0.198,0.32,0.113	0.223
SE.Macf1.5.141221237.141221337.141219078.141219156.141223277.141223367	0	0.343,0.342,0.308	0.067,0.085,0.168	0.224
SE.Mdm2.7.60742285.60742419.60737890.60737965.60742591.60742752	6.05072e-12	0.951,0.983,1.0	0.741,0.694,0.826	0.224
SE.Tmem50b.11.31747068.31747205.31733105.31733245.31752126.31752243	7.36079e-05	0.425,0.296,0.279	0.038,0.117,0.173	0.224
SE.Syde2.2.251892967.251893012.251889006.251889238.251893540.251894037	0.0356189	0.596,0.407,0.442	0.078,0.211,0.483	0.224
SE.Zswim6.2.38991058.38991200.38987650.38987786.38992221.38992482	1.34082e-10	0.18,0.316,0.291	0.024,0.016,0.071	0.225
MXE.Ptbp3.5.76679548.76679641.76682013.76682047.76678255.76678472.76682255.76682395	0.00707628	0.627,0.613,0.524	0.336,0.424,0.329	0.225
SE.Lima1.7.141452846.141453002.141452320.141452422.141456254.141456403	2.54448e-07	0.331,0.124,0.374	0.016,0.049,0.085	0.226
MXE.Srsf3.20.6294211.6294667.6295543.6295582.6293248.6293383.6295741.6295828	0	0.346,0.315,0.37	0.113,0.107,0.132	0.226
A3SS.Ilf3.8.22424295.22424540.22424310.22424540.22423473.22423567	0.0021944	0.184,0.288,0.385	0.076,0.08,0.023	0.226
SE.Dmd.X.51882324.51882456.51881033.51881215.51958186.51958375	5.00023e-07	0.494,0.506,0.518	0.271,0.225,0.341	0.227
MXE.Pdlim7.17.9658263.9658294.9658728.9658847.9658028.9658180.9659478.9659615	5.28711e-09	0.671,0.655,0.63	0.386,0.463,0.424	0.228
MXE.Tmem109.1.226929746.226929869.226934189.226934308.226928607.226928852.226935626.226935689	0.0019157	0.904,1.0,0.888	0.678,0.61,0.821	0.228
A3SS.AABR07035787.1.12.22470550.22470697.22470594.22470697.22470380.22470470	0.0375372	0.779,0.893,0.653	0.588,0.554,0.498	0.228
RI.Med14.X.11046771.11047163.11046771.11046932.11047016.11047163	4.8018e-06	0.36,0.186,0.311	0.027,0.111,0.036	0.228
RI.Mark2.1.222534842.222535070.222534842.222534942.222535051.222535070	0.046167	0.417,0.282,0.543	0.05,0.186,0.322	0.228
SE.Daxx.20.5485006.5485247.5484690.5484913.5485770.5485850	0.00268592	0.462,0.398,0.425	0.25,0.22,0.127	0.229
MXE.Tns1.9.81217396.81217489.81221262.81221338.81208146.81208345.81222157.81222354	2.84891e-06	0.755,0.742,0.749	0.588,0.443,0.527	0.229
A3SS.Usp13.2.119288369.119288500.119288473.119288500.119287613.119287736	0.000692364	0.181,0.448,0.109	0.039,0.013,0.0	0.229
SE.Ptprd.5.92962806.92962848.92962207.92962305.92974695.92974808	0.00049466	0.574,0.657,0.524	0.313,0.351,0.402	0.23
SE.Safb2.9.10475612.10475794.10473045.10473133.10476176.10476243	0.0111247	0.385,0.43,0.119	0.096,0.053,0.096	0.23
SE.Rps6kb2.1.219408975.219409115.219408812.219408870.219410221.219410369	1.75004e-05	0.329,0.311,0.162	0.033,0.058,0.018	0.231
A3SS.Htt.14.81170079.81170246.81170079.81170190.81180965.81181093	0.0119634	0.317,0.42,0.184	0.119,0.108,0.0	0.231
SE.Pam.9.111132205.111132520.111119814.111119886.111141932.111142062	0.000605069	0.472,0.506,0.547	0.085,0.344,0.401	0.232
SE.Ttc3.11.34611538.34611724.34598491.34598537.34612626.34612781	0.0145906	0.885,0.732,0.672	0.459,0.503,0.631	0.232
SE.Fchsd2.1.166208848.166208992.166176691.166176737.166231692.166231769	1.14605e-08	0.255,0.234,0.346	0.086,0.034,0.017	0.233
SE.Pbrm1.16.7107628.7107743.7107280.7107420.7109242.7109395	3.22319e-06	0.422,0.328,0.292	0.136,0.124,0.082	0.233
SE.Tmem241.18.3505668.3505911.3504312.3504348.3507451.3507497	0.000721402	0.475,0.283,0.186	0.04,0.062,0.142	0.233
MXE.Fam149b1.15.4395188.4395316.4396662.4396762.4392149.4392292.4399537.4399589	0.00135904	0.499,0.528,0.488	0.242,0.271,0.303	0.233
A5SS.Nhlrc3.2.142686107.142686577.142686444.142686577.142685417.142685551	5.7432e-06	1.0,1.0,1.0	0.729,0.667,0.904	0.233
SE.Ptbp3.5.76684774.76684951.76682255.76682395.76692538.76692713	2.43931e-05	1.0,1.0,1.0	0.763,0.871,0.664	0.234
SE.Dcaf6.13.83616628.83616688.83606921.83607039.83634262.83634520	0.00712009	0.25,0.483,0.4	0.065,0.144,0.221	0.234
SE.Mybl1.5.9310732.9310850.9310139.9310244.9312519.9315114	0.0199953	0.477,0.598,0.707	0.297,0.411,0.371	0.234
A5SS.Fbxl19.1.199199753.199199915.199199753.199199786.199200922.199201434	0.010147	0.708,0.829,0.836	0.584,0.522,0.566	0.234
SE.Ankrd17.14.19377676.19378504.19376168.19376271.19382792.19382941	0.000169843	0.794,0.806,0.716	0.578,0.556,0.476	0.235
RI.Thoc6.10.12990683.12990876.12990683.12990732.12990811.12990876	2.72889e-12	0.277,0.315,0.23	0.014,0.072,0.03	0.235
SE.Dis3l2.9.93864368.93864457.93677289.93677391.93873172.93873401	0.000225689	0.33,0.477,0.417	0.184,0.14,0.192	0.236
RI.Ocel1.16.19768288.19768625.19768288.19768454.19768571.19768625	0.0438479	0.611,0.498,0.332	0.201,0.25,0.28	0.237
MXE.Mbnl1.2.150858410.150858459.150864801.150864896.150855965.150856223.150867718.150867793	1.85279e-06	0.613,0.618,0.608	0.277,0.376,0.471	0.238
A3SS.Bud31.12.11238093.11238349.11238093.11238190.11239371.11239508	8.9911e-06	0.808,0.759,0.81	0.586,0.519,0.555	0.239
SE.Ppp6r2.7.130252432.130252513.130251869.130251955.130252881.130252979	0.00727091	0.642,0.691,0.666	0.391,0.316,0.573	0.24
A5SS.Hyou1.8.48699768.48700180.48699768.48699984.48700763.48700861	0.0275823	1.0,0.706,0.714	0.583,0.484,0.632	0.24
SE.Ehmt2.20.4584121.4584223.4583856.4583971.4584421.4584570	4.37088e-06	0.893,0.775,0.889	0.536,0.651,0.646	0.241
MXE.Tmem109.1.226929746.226929869.226934189.226934430.226928607.226928852.226935626.226935689	0.000208131	0.888,1.0,0.889	0.672,0.616,0.766	0.241
A3SS.Ripk3.15.34473904.34474129.34473904.34474048.34474274.34474379	1.01211e-12	0.244,0.274,0.256	0.006,0.018,0.026	0.241
A3SS.Apc.18.27084801.27085039.27084963.27085039.27082217.27082316	0.0314632	0.74,1.0,0.966	0.726,0.641,0.617	0.241
SE.Cog1.10.102179819.102179854.102179310.102179389.102180377.102180569	1.84347e-05	0.172,0.385,0.314	0.066,0.015,0.052	0.246
SE.Ppfibp1.4.181412641.181412886.181412020.181412192.181414725.181414873	1.3173e-05	0.461,0.49,0.512	0.19,0.181,0.35	0.247
SE.Ivns1abp.13.68713259.68713400.68712730.68712856.68714223.68714331	3.15893e-11	0.372,0.327,0.275	0.038,0.117,0.076	0.248
A3SS.RGD1565775.2.188077086.188077199.188077114.188077199.188076016.188076184	0.00430419	0.869,0.787,0.816	0.465,0.663,0.597	0.249
SE.Dysf.4.115789928.115790069.115780480.115780563.115791198.115791314	4.22578e-06	0.442,0.477,0.409	0.153,0.167,0.256	0.251
SE.Tcta.8.117081417.117081496.117079094.117080369.117081799.117082162	2.35619e-05	0.771,0.877,0.875	0.577,0.574,0.619	0.251
A5SS.Piga.X.31798926.31799560.31799523.31799560.31795950.31796730	0.0150142	1.0,0.649,0.867	0.681,0.434,0.649	0.251
A5SS.Alg11.16.74864575.74864816.74864779.74864816.74863614.74863845	0.0476674	0.0,0.608,0.192	0.035,0.011,0.0	0.251
SE.Macf1.5.141044203.141044314.141041696.141041826.141044787.141044999	0	0.198,0.371,0.297	0.022,0.038,0.051	0.252
SE.Srsf7.6.2883883.2884099.2883405.2883639.2884237.2884344	7.38265e-05	0.925,1.0,0.957	0.597,0.723,0.806	0.252
SE.Pcyt2.10.109791131.109791371.109790746.109790885.109791689.109791734	0.0189047	0.594,0.315,0.41	0.125,0.255,0.184	0.252
SE.Ttc3.11.34600746.34600838.34598491.34598537.34612626.34612781	0.042516	0.476,0.425,0.414	0.225,0.187,0.147	0.252
SE.Pan3.12.9297690.9297852.9273124.9273272.9309986.9310057	2.93317e-07	0.547,0.608,0.6	0.288,0.332,0.376	0.253
SE.Dnase1l1.X.156435356.156435434.156435178.156435267.156436827.156436928	0.0129847	0.747,0.55,0.814	0.416,0.537,0.399	0.253
MXE.Crebrf.10.16711872.16712067.16724061.16725151.16709989.16710179.16727735.16727861	7.47783e-12	0.805,0.801,0.802	0.464,0.578,0.608	0.253
MXE.Acta2.1.252549823.252550006.252550033.252550213.252547515.252547611.252550360.252550394	0	0.852,0.911,0.824	0.599,0.585,0.642	0.254
SE.Srsf7.6.2883883.2884013.2883405.2883639.2884524.2884701	0	0.244,0.302,0.331	0.014,0.032,0.065	0.255
SE.Clk4.10.36726644.36726735.36725382.36725605.36727129.36727196	0.00377555	0.896,0.842,0.913	0.792,0.637,0.45	0.257
A5SS.Hipk1.2.206229406.206229638.206229582.206229638.206224014.206228676	0.000151946	0.128,0.429,0.413	0.055,0.078,0.065	0.257
A3SS.Ddx39a.19.24853744.24853986.24853854.24853986.24853359.24853478	0	0.377,0.255,0.232	0.023,0.036,0.034	0.257
SE.Dysf.4.115789928.115790091.115780480.115780563.115791198.115791314	8.98178e-07	0.44,0.456,0.43	0.142,0.159,0.251	0.258
SE.Rtn4.14.114140328.114140358.114139415.114139472.114167138.114167346	1.65278e-05	0.295,0.315,0.315	0.044,0.029,0.075	0.259
MXE.Ofd1.X.29584502.29584594.29588323.29588435.29583142.29583216.29591399.29592011	0.00229978	0.62,0.681,0.521	0.301,0.458,0.285	0.259
A5SS.Btbd19.5.135992789.135993020.135992966.135993020.135991213.135991273	0.000677167	0.381,0.449,0.479	0.078,0.321,0.133	0.259
SE.Tcta.8.117081417.117081506.117079094.117080369.117081799.117082162	1.01082e-05	0.769,0.871,0.877	0.553,0.561,0.624	0.26
SE.Tcta.8.117081417.117081520.117079094.117080369.117081799.117082162	1.84988e-05	0.758,0.87,0.869	0.552,0.558,0.601	0.262
MXE.Acta2.1.252549823.252550006.252550033.252550205.252547515.252547611.252550360.252550394	0	0.852,0.906,0.815	0.586,0.57,0.63	0.262
MXE.Pan3.12.9273124.9273272.9297690.9297852.9240562.9240810.9309986.9310057	2.18523e-08	0.509,0.598,0.539	0.342,0.223,0.295	0.262
A5SS.Esf1.3.133232085.133232322.133232235.133232322.133229614.133230292	0.00359791	0.814,1.0,0.918	0.52,0.628,0.799	0.262
SE.Arhgef2.2.187994119.187994221.187993757.187993943.188002430.188002479	5.03755e-05	0.37,0.339,0.446	0.08,0.168,0.118	0.263
A5SS.Smpd2.20.46213345.46213432.46213349.46213432.46213092.46213225	8.39277e-05	0.188,0.49,0.138	0.0,0.028,0.0	0.263
A3SS.Sept4.10.74883649.74883749.74883702.74883749.74883299.74883512	0.0136116	0.854,0.82,0.91	0.514,0.702,0.579	0.263
MXE.Dlg1.11.72199979.72200013.72200683.72200780.72182191.72182233.72204928.72204998	8.06137e-12	0.864,0.989,0.958	0.703,0.705,0.61	0.264
SE.Clstn1.5.166580880.166580910.166571148.166571271.166582005.166582201	0	0.513,0.526,0.536	0.298,0.208,0.273	0.265
SE.Ap2b1.10.70579707.70579749.70566373.70566566.70580539.70580686	1.95756e-06	0.775,0.797,0.759	0.505,0.558,0.471	0.266
A5SS.Stx5.1.224940047.224940182.224940047.224940149.224940281.224940525	0.00066993	0.921,1.0,1.0	0.73,0.875,0.517	0.266
RI.Sept4.10.74883349.74883749.74883349.74883512.74883702.74883749	0.0355523	0.709,0.601,0.755	0.527,0.391,0.348	0.266
A5SS.Zc3h11a.13.50216578.50216817.50216578.50216659.50217677.50217788	4.22523e-07	0.201,0.511,0.146	0.024,0.011,0.023	0.267
A3SS.Pum1.5.148870605.148870792.148870687.148870792.148868268.148868362	0.00027671	0.291,0.464,0.215	0.0,0.09,0.078	0.267
MXE.Il17rc.4.145436552.145436668.145436668.145436714.145435692.145435743.145436865.145436987	8.85859e-08	0.375,0.427,0.343	0.088,0.154,0.099	0.268
MXE.Ppp1r12a.7.51431355.51431446.51431813.51431870.51425329.51425420.51432783.51432888	2.72411e-05	0.414,0.492,0.482	0.263,0.229,0.092	0.268
SE.Ube2j2.5.173375015.173375128.173372668.173372835.173377736.173377867	0.00604199	0.659,0.673,0.552	0.341,0.351,0.384	0.269
SE.Kif1c.10.57324168.57324348.57322330.57322439.57324568.57324701	1.50397e-12	0.816,0.843,0.804	0.529,0.555,0.57	0.27
SE.Gapvd1.3.13794301.13794382.13791619.13791780.13795723.13795913	8.96933e-05	0.781,0.617,0.645	0.389,0.37,0.474	0.27
MXE.Asmtl.12.18533715.18533763.18533934.18533999.18532383.18532515.18534078.18534140	0.00771403	0.622,0.504,0.614	0.429,0.279,0.218	0.271
SE.Gsn.3.14482473.14482535.14467329.14467415.14483940.14484145	0	0.226,0.353,0.303	0.021,0.015,0.029	0.272
SE.Fgfr1.16.71282781.71283048.71280955.71281045.71306208.71306391	1.59165e-12	0.459,0.548,0.419	0.206,0.176,0.228	0.272
SE.Fermt2.15.19825648.19825681.19825113.19825339.19832372.19832507	0	0.392,0.343,0.359	0.052,0.083,0.133	0.275
MXE.Ivns1abp.13.68713259.68713400.68714223.68714331.68712730.68712856.68717979.68718204	3.85984e-07	0.381,0.487,0.306	0.054,0.162,0.132	0.275
MXE.Pdlim5.2.247872164.247872296.247877622.247877663.247858118.247858291.247883195.247883232	0.0234943	0.516,0.537,0.512	0.155,0.171,0.414	0.275
MXE.Rin2.3.139936831.139936987.139968448.139968597.139907831.139907951.139980556.139980649	0.0371569	0.36,0.609,0.752	0.228,0.375,0.292	0.275
SE.Pbrm1.16.7107628.7107752.7107280.7107420.7109242.7109395	5.19009e-10	0.45,0.393,0.367	0.142,0.119,0.114	0.278
SE.Macf1.5.141221241.141221337.141219078.141219156.141223277.141223367	0	0.481,0.437,0.486	0.124,0.177,0.267	0.279
SE.Immt.4.99782192.99782300.99779101.99779231.99783694.99783918	0.00487185	0.545,0.589,0.721	0.266,0.318,0.433	0.279
A3SS.Usp33.2.257586014.257586109.257586038.257586109.257585746.257585916	0.00179229	0.866,0.731,0.821	0.606,0.453,0.518	0.28
MXE.Prnp.3.124519940.124520061.124527962.124528058.124518258.124518356.124529319.124531316	0.028221	0.535,0.415,0.739	0.248,0.332,0.265	0.281
SE.Ehmt2.20.4584145.4584223.4583856.4583971.4584421.4584570	0.00252366	0.732,0.56,0.651	0.272,0.423,0.403	0.282
SE.Srsf3.20.6294502.6294667.6293248.6293383.6295543.6295582	0	0.385,0.311,0.398	0.061,0.083,0.1	0.283
MXE.Tns1.9.81217396.81217489.81226935.81227019.81208146.81208345.81232084.81233665	0	0.327,0.233,0.336	0.0,0.032,0.016	0.283
MXE.Setd4.11.33791208.33791418.33794518.33794556.33789251.33789681.33797244.33797343	0.0198209	0.429,0.585,0.659	0.184,0.222,0.41	0.286
A5SS.Txnrd1.7.26984162.26984400.26984307.26984400.26983075.26983183	7.20615e-10	0.43,0.423,0.511	0.12,0.198,0.184	0.287
A3SS.Dhrsx.12.18519153.18519300.18519198.18519300.18518658.18518727	0.00196402	0.634,0.503,0.67	0.222,0.275,0.448	0.287
SE.Dlg4.10.56636024.56636263.56627410.56627632.56639193.56639247	0.00989865	1.0,1.0,1.0	0.745,1.0,0.392	0.288
SE.Rtn4.14.114140328.114142680.114139415.114139472.114167138.114167346	1.21678e-12	0.927,0.933,0.916	0.538,0.621,0.751	0.289
MXE.Ppp1r12a.7.51431355.51431446.51431813.51431910.51425329.51425420.51432783.51432888	2.19894e-13	0.264,0.43,0.321	0.037,0.036,0.075	0.289
A5SS.Ccndbp1.3.112951280.112951513.112951280.112951340.112951610.112951690	0.00066993	0.065,0.229,0.621	0.0,0.044,0.0	0.29
A3SS.Mknk2.7.11914824.11915035.11914930.11915035.11914637.11914711	0	0.253,0.303,0.378	0.026,0.018,0.019	0.29
A3SS.Arv1.19.57490486.57490640.57490526.57490640.57487378.57487498	6.85617e-05	1.0,1.0,1.0	0.877,0.792,0.461	0.29
A3SS.Pms2.12.12719865.12720049.12719865.12720007.12721642.12722477	0.000302156	0.028,0.457,0.384	0.0,0.0,0.0	0.29
SE.Xpnpep1.1.273750841.273750930.273743234.273743359.273758212.273758442	0	0.901,0.938,0.845	0.598,0.591,0.619	0.292
SE.Dlg1.11.72200683.72200783.72199979.72200013.72204928.72204998	3.27507e-05	0.745,0.968,0.96	0.653,0.564,0.579	0.292
SE.Ubr4.5.157900269.157900302.157899343.157899560.157901412.157901476	1.51326e-08	0.429,0.2,0.415	0.024,0.03,0.109	0.294
SE.Ppfia1.1.217680291.217680366.217679862.217679946.217681497.217681632	4.21508e-08	0.484,0.599,0.517	0.149,0.26,0.299	0.297
SE.Dlg1.11.72200679.72200783.72199979.72200013.72204928.72204998	3.68744e-05	0.739,0.967,0.958	0.645,0.56,0.568	0.297
SE.Scrib.7.117108123.117108207.117107870.117107969.117108701.117108764	0.0430648	0.37,0.684,0.373	0.113,0.158,0.265	0.297
SE.Ctnnd1.3.72026275.72026484.72024076.72024148.72052711.72052990	5.594e-05	0.948,0.74,0.8	0.551,0.543,0.501	0.298
A3SS.Fkbp2.1.222233515.222233720.222233515.222233684.222235008.222235102	3.96395e-05	0.854,0.84,0.795	0.527,0.5,0.569	0.298
RI.Rhbdf1.10.15683923.15684154.15683923.15684035.15684103.15684154	2.6459e-06	0.55,0.269,0.329	0.143,0.029,0.078	0.299
SE.Tra2a.4.78913981.78914060.78913332.78913466.78923981.78924181	0	0.279,0.35,0.394	0.02,0.059,0.041	0.301
SE.Ttc3.11.34600703.34600838.34598491.34598537.34612626.34612781	0.00244414	0.844,0.727,0.6	0.369,0.375,0.514	0.304
SE.Idh3g.X.157004647.157004659.157004329.157004386.157004884.157004982	1.19103e-12	0.749,0.726,0.764	0.471,0.392,0.458	0.306
SE.Lcorl.14.69802655.69802843.69800155.69800219.69818121.69818201	0.00609671	0.522,0.319,0.487	0.103,0.243,0.065	0.306
MXE.Fyn.20.44595880.44596045.44596417.44596573.44592706.44592856.44599140.44599320	6.68566e-13	0.899,0.917,0.879	0.645,0.572,0.552	0.309
MXE.Gstp1.1.219293536.219293641.219293831.219293867.219293348.219293436.219294076.219294147	3.85424e-10	0.358,0.48,0.39	0.066,0.095,0.139	0.309
SE.Fam198b.2.178679426.178679656.178679040.178679130.178680451.178681586	0	1.0,0.992,0.986	0.653,0.756,0.635	0.311
MXE.Anxa1.1.237896104.237896352.237897292.237897400.237895187.237895310.237898147.237898241	0	0.42,0.432,0.444	0.129,0.124,0.098	0.315
MXE.Dlg1.11.72199979.72200013.72200679.72200783.72182191.72182233.72204928.72204998	1.20648e-07	0.764,0.975,0.941	0.607,0.567,0.552	0.318
A5SS.Clasrp.1.80494674.80494718.80494678.80494718.80494365.80494426	0.0224003	0.325,0.627,0.311	0.0,0.116,0.194	0.318
SE.Srsf3.20.6294211.6294667.6293248.6293383.6295543.6295582	0	0.48,0.406,0.496	0.122,0.134,0.159	0.322
SE.Rtn3.1.222707086.222709195.222686384.222686592.222733910.222734241	0	0.285,0.471,0.438	0.045,0.086,0.089	0.325
SE.Lgals1.7.120155369.120155554.120153183.120153228.120155710.120155882	0.00415482	0.797,0.842,0.722	0.305,0.619,0.458	0.326
MXE.Zcchc7.5.60413547.60413676.60422233.60422326.60405544.60405580.60424040.60424136	0.015635	0.785,0.627,0.906	0.321,0.52,0.496	0.327
MXE.Tpm1.8.72840038.72840164.72840379.72840505.72828263.72828397.72841276.72841496	0	0.937,0.955,0.931	0.516,0.599,0.724	0.328
SE.Clstn1.5.166594603.166594651.166591700.166591863.166596069.166596227	1.50397e-12	0.877,0.856,0.89	0.515,0.463,0.657	0.329
MXE.Col5a1.3.6570755.6570824.6570885.6570954.6567402.6567648.6574346.6574580	0	0.855,0.912,0.84	0.461,0.557,0.598	0.33
MXE.Tmem109.1.226929746.226929869.226934189.226934290.226928607.226928852.226935626.226935689	0.000988024	0.88,1.0,0.854	0.601,0.406,0.735	0.331
A5SS.mrpl24.2.187288643.187288784.187288643.187288671.187292417.187292650	2.07908e-05	0.795,0.7,0.879	0.431,0.452,0.494	0.332
A3SS.Pygo2.2.188758065.188758217.188758167.188758217.188757488.188757771	0.000173919	0.682,0.43,0.393	0.118,0.176,0.215	0.332
RI.Klhl42.4.181481146.181482027.181481146.181481242.181481817.181482027	0.00184791	1.0,1.0,0.746	0.507,0.511,0.731	0.332
A5SS.Lactb.8.72761835.72762057.72761866.72762057.72761270.72761622	0.00108366	0.504,0.47,0.604	0.297,0.194,0.087	0.333
MXE.Fam149b1.15.4395111.4395316.4396662.4396762.4392149.4392292.4399537.4399589	8.11765e-06	0.717,0.753,0.708	0.36,0.398,0.418	0.334
SE.Srsf6.3.159306729.159306845.159305779.159305928.159307189.159307314	0	0.464,0.411,0.422	0.093,0.082,0.118	0.335
SE.AABR07073181.1.5.155853492.155853543.155851503.155851664.155853919.155854048	0	0.987,0.965,0.978	0.598,0.579,0.743	0.337
SE.Clk1.9.65304293.65304384.65303836.65303903.65305253.65305479	0	0.896,0.876,0.798	0.55,0.527,0.483	0.337
A3SS.Pygo2.2.188758061.188758217.188758167.188758217.188757488.188757771	0.000240766	0.695,0.446,0.394	0.143,0.188,0.194	0.337
SE.Prmt1.1.100978232.100978286.100977649.100977751.100980304.100980340	2.78581e-05	0.522,0.477,0.637	0.212,0.28,0.127	0.339
MXE.Abi3bp.11.46253324.46253396.46301767.46301845.46245627.46245687.46305864.46305957	0.00806167	0.918,0.837,0.841	0.367,0.491,0.72	0.339
A5SS.Huwe1.X.21544220.21544321.21544220.21544288.21547185.21547377	0.00141073	0.623,0.375,0.313	0.117,0.0,0.17	0.341
RI.Elp5.10.56589900.56590081.56589900.56589931.56590020.56590081	1.31978e-14	0.288,0.38,0.538	0.053,0.065,0.064	0.341
SE.Cep164.8.50086342.50086489.50083213.50083390.50087436.50087568	0.00676135	0.479,0.287,0.682	0.068,0.168,0.187	0.342
A3SS.Ilf3.8.22424295.22424540.22424310.22424540.22423889.22423928	0.00142912	0.196,0.432,0.585	0.046,0.105,0.036	0.342
SE.Sptan1.3.8582819.8582834.8582330.8582493.8584225.8584357	0	0.387,0.371,0.364	0.03,0.019,0.045	0.343
SE.Senp6.8.87516196.87516210.87511460.87511565.87521065.87521136	2.45603e-05	0.642,0.596,0.473	0.14,0.358,0.184	0.343
SE.Lrrfip1.9.98233128.98233206.98221053.98221113.98239939.98239975	0.00358053	0.749,0.958,0.94	0.541,0.606,0.472	0.343
SE.Abi1.17.90011303.90011318.90004212.90004389.90012025.90012126	4.2704e-07	0.56,0.712,0.791	0.327,0.265,0.437	0.345
MXE.Mbd1.18.70255077.70255206.70255576.70255687.70254836.70254983.70255768.70255837	0.000275389	0.782,0.54,0.671	0.306,0.417,0.235	0.345
SE.Dnajc25.5.76161071.76161298.76150839.76151224.76165248.76165401	5.9602e-07	0.527,0.637,0.498	0.255,0.173,0.195	0.346
A3SS.Sf1.1.221747681.221749086.221748319.221749086.221746742.221746922	0.0444653	0.43,0.804,0.721	0.179,0.315,0.42	0.347
A5SS.Safb2.9.10483970.10484144.10483970.10484080.10485800.10485928	0.00020995	0.432,0.548,0.31	0.027,0.122,0.096	0.348
A3SS.Fkbp2.1.222233515.222233748.222233515.222233684.222235008.222235102	2.9351e-05	0.794,0.764,0.728	0.411,0.388,0.435	0.351
SE.Gk.X.54261299.54261317.54259412.54259448.54262373.54262440	2.19113e-05	0.917,1.0,0.931	0.64,0.619,0.53	0.353
SE.Mtx3.2.22432599.22432685.22431251.22431409.22435000.22435307	0.000120055	0.492,0.459,0.597	0.044,0.268,0.176	0.353
MXE.LOC108348064.8.72479918.72480046.72485927.72486075.72476424.72477119.72486234.72486357	0.00692761	0.697,0.537,0.408	0.108,0.396,0.08	0.353
RI.Dync1i2.3.57817692.57818037.57817692.57817810.57817952.57818037	0.00531285	0.824,0.585,0.93	0.56,0.392,0.322	0.355
A3SS.Adarb1.20.12065060.12066042.12065107.12066042.12061665.12061740	1.28797e-09	0.745,0.812,0.709	0.427,0.279,0.492	0.356
A3SS.Mier1.5.122646124.122646201.122646166.122646201.122643464.122643565	0.0272791	0.913,0.603,0.923	0.376,0.412,0.584	0.356
SE.Myo6.8.87686131.87686321.87685743.87685917.87689768.87689807	0.00127509	0.22,0.774,0.186	0.01,0.037,0.058	0.358
A3SS.Msantd2.8.39987071.39987327.39987227.39987327.39960541.39961051	0.000185569	0.776,0.961,0.973	0.644,0.509,0.461	0.365
SE.Tbc1d1.14.45670211.45670331.45668935.45669075.45673057.45673338	1.00739e-08	0.775,0.597,0.745	0.261,0.371,0.386	0.366
A5SS.Zmynd11.17.63830891.63831128.63831059.63831128.63830023.63830296	1.35545e-11	0.546,0.706,0.515	0.189,0.216,0.26	0.367
SE.Clk4.10.36726647.36726735.36725382.36725605.36727129.36727196	0.00228025	0.791,0.753,0.817	0.602,0.447,0.209	0.368
SE.ST7.4.45155451.45155520.45153155.45153231.45157310.45157465	0.00214122	0.379,0.79,0.318	0.074,0.156,0.15	0.369
SE.Fnbp4.3.79597456.79597559.79597000.79597134.79598119.79598304	0.00295155	0.71,0.37,0.623	0.246,0.246,0.102	0.37
MXE.Col5a1.3.6570755.6570824.6570885.6570954.6568350.6568463.6574346.6574580	0	0.816,0.865,0.805	0.394,0.477,0.506	0.37
SE.Tbc1d1.14.45670905.45671070.45668935.45669075.45673057.45673338	1.06293e-10	0.773,0.678,0.663	0.247,0.352,0.401	0.371
SE.Col5a1.3.6570755.6570789.6568350.6568463.6570885.6570954	0	0.538,0.575,0.525	0.11,0.183,0.206	0.38
SE.Svil.17.55289394.55290249.55288179.55288214.55297975.55298582	5.87623e-12	0.81,0.822,0.848	0.375,0.387,0.579	0.38
SE.Ppip5k2.9.111275957.111276020.111272718.111272791.111279477.111279618	2.8049e-05	0.379,0.671,0.473	0.095,0.157,0.126	0.382
MXE.Pfdn1.18.29234899.29235048.29249382.29249489.29233986.29234774.29265188.29265273	0.00243148	0.325,0.682,0.662	0.131,0.251,0.138	0.383
SE.Ttc3.11.34611538.34611627.34598491.34598537.34612626.34612781	1.48606e-05	0.513,0.612,0.401	0.085,0.16,0.116	0.388
MXE.Pfdn1.18.29234899.29235046.29249382.29249489.29233986.29234774.29265188.29265273	0.0123823	0.285,0.761,0.689	0.155,0.26,0.155	0.388
A3SS.Col5a1.3.6570755.6570954.6570885.6570954.6568350.6568463	0	0.607,0.678,0.613	0.198,0.253,0.257	0.397
A5SS.Tmbim6.7.141054219.141054389.141054219.141054269.141061862.141061947	0.000543819	0.67,0.76,0.851	0.239,0.459,0.388	0.398
MXE.Acta2.1.252549823.252550006.252550033.252550148.252547515.252547611.252550360.252550394	0	0.826,0.873,0.751	0.412,0.378,0.456	0.401
SE.Lgals1.7.120155369.120155512.120153183.120153228.120155710.120155886	0.000335539	0.781,0.798,0.621	0.195,0.476,0.319	0.403
SE.Clk1.9.65304302.65304384.65303836.65303903.65305253.65305479	0	0.812,0.78,0.657	0.334,0.364,0.324	0.409
SE.Dlg1.11.72200683.72200780.72199979.72200013.72204928.72204998	0.000395978	0.63,0.929,0.887	0.448,0.422,0.35	0.409
MXE.Itpr1.4.140450743.140450952.140464540.140464591.140450441.140450553.140470173.140470306	0.00517941	0.609,0.732,0.732	0.507,0.215,0.122	0.41
SE.Ehmt2.20.4584121.4584151.4583856.4583971.4584421.4584570	4.08467e-07	0.782,0.626,0.822	0.254,0.39,0.352	0.411
MXE.LOC108348064.8.72479918.72480046.72485927.72486087.72476424.72477119.72486234.72486357	0.00161367	0.687,0.516,0.724	0.139,0.408,0.143	0.412
MXE.Pkm.8.64498947.64499114.64499491.64499658.64496090.64496243.64501586.64501768	0	0.593,0.646,0.563	0.209,0.196,0.158	0.413
MXE.Col5a1.3.6570755.6570829.6570885.6570954.6568350.6568463.6574346.6574580	0	0.605,0.706,0.615	0.167,0.265,0.256	0.413
SE.Dlg1.11.72200679.72200780.72199979.72200013.72204928.72204998	0.000496616	0.621,0.928,0.874	0.432,0.417,0.331	0.414
MXE.Anxa1.1.237896104.237896352.237897292.237897380.237895187.237895310.237898147.237898241	0	0.394,0.444,0.434	0.008,0.0,0.0	0.421
SE.Lima1.7.141452846.141452866.141452320.141452422.141456254.141456403	1.29199e-12	0.654,0.232,0.454	0.007,0.028,0.032	0.424
A5SS.Ezh2.4.77287041.77287255.77287173.77287255.77286263.77286344	7.36564e-10	0.586,0.578,0.255	0.036,0.045,0.036	0.434
MXE.Dlg1.11.72199979.72200013.72200679.72200780.72182191.72182233.72204928.72204998	1.16703e-05	0.654,0.945,0.842	0.392,0.427,0.317	0.435
A5SS.Cdk11b.5.173052686.173052929.173052686.173052810.173054110.173054226	0.0144777	0.286,1.0,0.545	0.154,0.155,0.202	0.44
MXE.Ube2d3.2.240629460.240629681.240640702.240640753.240627435.240627732.240642882.240642946	1.28331e-07	0.855,0.967,0.756	0.424,0.38,0.439	0.445
A5SS.Zmynd8.3.162501500.162501905.162501653.162501905.162499186.162499377	0.0135728	0.391,0.78,0.759	0.178,0.217,0.197	0.446
SE.Nrip1.11.14717821.14717934.14700872.14700991.14721240.14721315	3.30752e-09	0.599,0.483,0.398	0.027,0.067,0.045	0.447
A3SS.Dync1i2.3.57817912.57818037.57817952.57818037.57817692.57817810	0.0156999	0.681,0.308,0.858	0.192,0.132,0.18	0.448
SE.Col6a3.9.97987401.97988022.97981211.97981814.97989209.97989297	0.0017646	0.858,0.885,0.7	0.625,0.189,0.278	0.45
SE.Cobl.14.92414789.92414960.92378477.92378787.92417429.92417568	0.0231153	0.502,1.0,0.786	0.201,0.37,0.351	0.455
SE.Col4a5.X.112961883.112961892.112956286.112956472.112964677.112964811	5.8098e-09	0.691,0.595,0.633	0.116,0.058,0.361	0.461
SE.Cdk11b.5.173052882.173052929.173052686.173052810.173054110.173054226	0.0290619	0.253,1.0,0.437	0.098,0.084,0.123	0.462
A5SS.Zfp598.10.14043632.14043750.14043632.14043741.14044111.14044299	6.68321e-07	0.681,0.777,0.69	0.216,0.218,0.3	0.471
SE.Col4a5.X.112958131.112958140.112956286.112956472.112964677.112964811	2.53545e-07	0.853,0.82,0.811	0.208,0.268,0.585	0.474
SE.Atp2b4.13.50145415.50145590.50141909.50142086.50149536.50153823	3.49343e-11	0.673,0.614,0.625	0.107,0.213,0.153	0.48
SE.Uggt1.9.42732791.42732815.42732231.42732326.42733608.42733707	7.81614e-14	1.0,1.0,0.823	0.458,0.393,0.529	0.481
SE.Actn1.6.103379313.103379379.103378007.103378166.103379819.103379900	0	0.876,0.797,0.875	0.256,0.283,0.542	0.489
SE.Rps24.16.760364.760382.759685.759796.761662.761682	0	0.682,0.63,0.628	0.112,0.145,0.211	0.491
SE.Wwp2.19.39602951.39603016.39598382.39598557.39603119.39603174	3.09527e-09	0.738,0.677,0.826	0.094,0.266,0.404	0.492
SE.Col16a1.5.148292581.148292626.148291786.148291831.148294315.148294369	0	1.0,1.0,0.971	0.498,0.444,0.546	0.494
MXE.Itpr1.4.140450743.140450952.140464543.140464591.140450441.140450553.140470173.140470306	3.41352e-05	0.884,0.87,0.87	0.502,0.281,0.323	0.506
SE.LOC108348064.8.72485927.72486075.72479918.72480046.72486234.72486357	8.08979e-06	0.872,0.717,0.75	0.155,0.388,0.269	0.509
MXE.Spire1.18.63237017.63237107.63239988.63240162.63236204.63236342.63242199.63242342	5.1896e-08	1.0,0.839,1.0	0.581,0.409,0.316	0.511
SE.LOC108348064.8.72485927.72486087.72479918.72480046.72486234.72486357	4.83752e-06	0.867,0.702,0.821	0.172,0.389,0.293	0.512
SE.Prtfdc1.17.87929429.87929517.87928989.87929066.87931271.87931318	6.27252e-09	0.827,0.91,1.0	0.335,0.335,0.46	0.536
RI.Sphk1.10.105500289.105502026.105500289.105500532.105501822.105502026	1.83329e-12	1.0,0.901,0.843	0.312,0.446,0.285	0.567
MXE.Tacc2.1.201188700.201188802.201238797.201238932.201183050.201188165.201281618.201281755	0	0.576,0.637,0.576	0.077,0.0,0.0	0.571
SE.Inf2.6.137177127.137177212.137176419.137177043.137177566.137177622	1.24219e-12	0.801,0.872,0.683	0.19,0.133,0.307	0.575
SE.Rab11fip1.16.69068369.69069992.69066871.69067664.69070773.69070882	0.000705314	0.617,1.0,1.0	0.267,0.368,0.256	0.575
SE.Rps24.16.760364.760382.759685.759796.762005.762075	0	0.604,0.58,0.598	0.011,0.009,0.018	0.581
SE.AABR07073181.1.5.155853497.155853543.155851503.155851664.155853919.155854048	0	0.95,0.873,0.918	0.245,0.259,0.482	0.585
A5SS.Sphk1.10.105500289.105501568.105500289.105500532.105501822.105502026	4.48513e-11	1.0,0.887,0.793	0.268,0.389,0.229	0.598
MXE.Acta2.1.252549823.252550006.252550033.252550065.252547515.252547611.252550360.252550394	0	0.613,0.79,0.736	0.174,0.099,0.047	0.606
SE.Tns1.9.81216556.81216580.81208146.81208345.81217396.81217489	0	0.665,0.709,0.709	0.054,0.083,0.094	0.617
SE.Slc4a7.15.11878804.11879173.11874561.11874677.11881741.11881930	0	0.745,0.929,0.687	0.143,0.13,0.17	0.639
SE.Cald1.4.62260046.62260175.62257937.62258337.62265574.62265720	0	0.655,0.685,0.686	0.012,0.016,0.044	0.651
MXE.Gsn.3.14482473.14482535.14482593.14482655.14467329.14467415.14483940.14484145	0	0.888,0.902,0.87	0.188,0.267,0.25	0.652
SE.Rps24.16.761662.761682.759685.759796.762005.762075	0	0.856,0.862,0.89	0.185,0.157,0.232	0.678
MXE.Gsn.3.14482473.14482535.14482584.14482655.14467329.14467415.14483940.14484145	0	0.826,0.877,0.777	0.112,0.142,0.171	0.685
SE.Rps24.16.761659.761682.759685.759796.762005.762075	0	0.746,0.717,0.776	0.065,0.041,0.071	0.687
SE.Cald1.4.62260091.62260175.62257937.62258337.62265574.62265720	0	0.725,0.75,0.746	0.011,0.022,0.067	0.707
MXE.Mbnl2.15.105640420.105640545.105670609.105670674.105640096.105640329.105687770.105688392	0	0.948,0.911,0.939	0.064,0.081,0.268	0.795
SE.Col16a1.5.148292581.148292668.148291786.148291831.148294315.148294369	0	1.0,1.0,0.918	0.191,0.113,0.166	0.816
MXE.Tacc2.1.201183050.201188165.201238797.201238932.201164769.201164867.201281618.201281755	0	0.842,0.892,0.827	0.002,0.034,0.037	0.829

## Sheet: D Ctr - P Ctr
ASEID	FDR	Psi.D.Ctr	Psi.P.Ctr	Delta Psi
SE.Stim1.1.167524808.167524901.167522744.167522976.167526833.167526900	0	0.658,0.413,0.57	0.096,0.13,0.111	0.435
SE.Mprip.10.46129845.46129896.46129339.46129425.46132876.46133571	0	0.715,0.747,0.699	0.211,0.332,0.261	0.452
SE.Mprip.10.46129845.46129892.46129339.46129425.46132876.46133571	0	0.919,0.924,0.92	0.487,0.568,0.559	0.383
SE.Mprip.10.46129830.46129892.46129339.46129425.46132876.46133571	0	0.979,0.981,0.979	0.832,0.865,0.836	0.135
SE.Mprip.10.46129830.46129896.46129339.46129425.46132876.46133571	0	0.954,0.96,0.955	0.717,0.768,0.725	0.22
SE.Myo9b.16.19728833.19728923.19727735.19727814.19730695.19730809	0	0.831,0.859,0.865	0.541,0.532,0.471	0.337
SE.Myl6.7.2907014.2907059.2906136.2906318.2907350.2907378	0	0.39,0.385,0.387	0.572,0.606,0.617	-0.211
SE.Ppfia1.1.217680291.217680366.217679862.217679946.217681497.217681632	0	0.435,0.421,0.376	0.067,0.144,0.138	0.294
SE.Ptprf.5.137046364.137046397.137045483.137045581.137048659.137048775	0	0.592,0.578,0.57	0.065,0.188,0.135	0.451
SE.Fn1.9.78928840.78929005.78927551.78927734.78930417.78930609	0	0.447,0.446,0.467	0.137,0.154,0.173	0.299
SE.Fn1.9.78928840.78928951.78927551.78927734.78930417.78930609	0	0.398,0.397,0.417	0.114,0.128,0.147	0.274
SE.Fn1.9.78928840.78929113.78927551.78927734.78930417.78930609	0	0.559,0.563,0.579	0.195,0.228,0.257	0.34
SE.Fn1.9.78918303.78918573.78916998.78917186.78919401.78919506	0	0.72,0.724,0.72	0.418,0.484,0.512	0.25
SE.Fn1.9.78928840.78928948.78927551.78927734.78930417.78930609	0	0.396,0.395,0.416	0.113,0.128,0.147	0.273
SE.Fn1.9.78928840.78929002.78927551.78927734.78930417.78930609	0	0.442,0.441,0.463	0.135,0.152,0.17	0.296
SE.Fn1.9.78928840.78928930.78927551.78927734.78930417.78930609	0	0.374,0.374,0.394	0.105,0.12,0.139	0.259
SE.Fn1.9.78928840.78928936.78927551.78927734.78930417.78930609	0	0.391,0.39,0.411	0.111,0.126,0.145	0.27
SE.Fn1.9.78928840.78929064.78927551.78927734.78930417.78930609	0	0.464,0.466,0.481	0.144,0.166,0.186	0.305
SE.Tecr.19.24707187.24707262.24706996.24707100.24707642.24707690	0	0.328,0.276,0.328	0.645,0.555,0.577	-0.282
SE.Tecr.19.24707187.24707232.24706996.24707100.24707642.24707694	0	0.717,0.678,0.717	0.909,0.881,0.891	-0.19
SE.Fmnl3.7.140993715.140993868.140992495.140992604.140996289.140996373	0	0.939,0.965,0.973	0.762,0.749,0.75	0.205
SE.Adgrl2.2.258828081.258828120.258825483.258825667.258828859.258829045	0	0.817,0.843,0.83	0.594,0.577,0.536	0.261
SE.AABR07073181.1.5.155853480.155853543.155851550.155851664.155853919.155854048	0	0.316,0.324,0.397	0.071,0.116,0.096	0.251
SE.AABR07073181.1.5.155853497.155853543.155851503.155851664.155853919.155854048	0	0.27,0.298,0.361	0.068,0.099,0.087	0.225
SE.AABR07073181.1.5.155853492.155853543.155851503.155851664.155853919.155854048	0	0.742,0.772,0.786	0.305,0.441,0.36	0.398
SE.Svil.17.55289394.55290249.55288179.55288214.55297975.55298582	0	0.495,0.473,0.598	0.056,0.169,0.126	0.405
SE.Rsrp1.5.153262977.153263022.153262432.153262569.153263943.153264030	0	0.506,0.554,0.39	0.054,0.077,0.037	0.427
SE.Ggnbp2.10.72171307.72171433.72171106.72171220.72175212.72175311	0	0.209,0.185,0.194	0.038,0.069,0.046	0.145
SE.Pdlim7.17.9658728.9658847.9658234.9658294.9659208.9659225	0	0.679,0.656,0.717	0.85,0.851,0.883	-0.177
SE.Actn1.6.103379313.103379379.103378007.103378166.103379819.103379900	0	0.463,0.477,0.448	0.111,0.123,0.103	0.35
SE.Actn1.6.103379313.103379376.103378007.103378166.103379819.103379900	0	0.457,0.472,0.438	0.108,0.122,0.098	0.346
SE.Actn1.6.103379819.103379900.103379313.103379379.103380858.103381005	0	0.159,0.149,0.169	0.571,0.452,0.526	-0.357
SE.Gnb1.5.172949059.172949156.172936580.172936629.172956244.172956283	0	1.0,1.0,0.999	0.966,0.848,0.852	0.111
SE.Phldb1.8.49009515.49009560.49008610.49008905.49010003.49010106	0	0.239,0.217,0.219	0.517,0.517,0.51	-0.29
SE.Arhgef10l.5.159072315.159072330.159071900.159072082.159074506.159074679	0	0.508,0.47,0.535	0.774,0.811,0.816	-0.296
SE.App.11.24440976.24441030.24435334.24435435.24447168.24447390	0	0.709,0.752,0.67	0.514,0.459,0.489	0.223
SE.Fat1.16.50374547.50374583.50372127.50373577.50379255.50379358	0	0.656,0.64,0.652	0.419,0.474,0.407	0.216
SE.Ect2.2.112825346.112825425.112824222.112824405.112825530.112825610	0	0.891,0.843,0.787	0.296,0.448,0.429	0.449
SE.Lrrfip1.9.98243215.98243287.98240694.98240820.98245064.98245235	0	0.61,0.629,0.649	0.268,0.392,0.309	0.306
SE.Flnb.15.18780302.18780341.18779402.18779505.18783400.18783648	0	0.873,0.817,0.908	0.385,0.409,0.421	0.461
SE.Flnb.15.18780269.18780341.18779402.18779505.18783400.18783648	0	0.948,0.915,0.965	0.645,0.69,0.655	0.279
SE.Col12a1.8.87042834.87042978.87040798.87041779.87044012.87044183	0	0.873,0.898,0.873	0.643,0.669,0.585	0.249
SE.Fbln2.4.122882651.122882786.122880650.122880752.122886344.122886479	0	0.354,0.259,0.232	0.062,0.104,0.091	0.196
SE.March7.3.46321232.46321281.46319639.46319753.46323840.46323976	0	0.912,0.917,0.94	0.611,0.609,0.523	0.342
SE.Elovl1.5.137257786.137257979.137257479.137257708.137258385.137258445	0	0.726,0.697,1.0	0.043,0.161,0.062	0.719
SE.Ppfibp1.4.181394960.181394993.181393584.181393699.181396178.181396240	0	0.886,0.909,0.915	0.484,0.529,0.542	0.385
SE.Arhgef2.2.187993766.187993943.187989038.187989132.188002430.188002575	1.16783e-13	0.174,0.198,0.133	0.519,0.37,0.515	-0.3
SE.Ect2.2.112825332.112825425.112824222.112824405.112825530.112825752	2.2932e-13	0.955,0.947,0.919	0.562,0.733,0.727	0.266
SE.Ect2.2.112825332.112825439.112824222.112824405.112825530.112825610	4.50449e-13	0.894,0.898,0.829	0.345,0.523,0.527	0.409
SE.Clk1.9.65304293.65304384.65303836.65303903.65305253.65305479	7.61104e-13	0.327,0.445,0.457	0.773,0.733,0.773	-0.35
SE.Mbnl1.2.150864085.150864121.150858305.150858459.150864801.150864896	2.24461e-12	0.24,0.211,0.23	0.478,0.41,0.449	-0.219
SE.Zfp207.10.67772402.67772495.67770988.67771146.67773346.67773592	3.04804e-12	0.375,0.331,0.351	0.166,0.214,0.181	0.165
SE.Eif5a.10.56530568.56530662.56528257.56528362.56531392.56531483	3.30822e-12	0.828,0.811,0.712	0.986,1.0,0.986	-0.207
SE.Ap2m1.11.84044267.84044273.84043948.84044110.84044657.84044738	6.6019e-12	0.77,0.746,0.738	0.613,0.517,0.566	0.186
SE.Actn1.6.103379819.103379900.103379313.103379376.103380858.103381005	1.41649e-11	0.827,0.894,0.824	0.965,0.953,0.973	-0.115
SE.Fbln2.4.122882651.122882792.122880650.122880752.122886344.122886479	1.58613e-11	0.574,0.419,0.395	0.15,0.193,0.178	0.289
SE.Elovl1.5.137257776.137257979.137257479.137257708.137258385.137258445	1.96719e-11	0.697,0.67,1.0	0.047,0.165,0.056	0.7
SE.Smtn.14.83758549.83758618.83755141.83755445.83758962.83759150	2.69872e-11	0.805,0.731,0.779	0.898,0.959,0.971	-0.171
SE.Hp1bp3.5.156586976.156587183.156581731.156581854.156587558.156587658	2.95207e-11	0.626,0.748,0.707	0.923,0.969,0.94	-0.25
SE.Axl.1.82566746.82566773.82563906.82564039.82568169.82568380	3.13513e-11	0.197,0.334,0.273	0.586,0.626,0.718	-0.375
SE.Uggt1.9.42732791.42732815.42732231.42732326.42733608.42733707	1.45222e-10	0.769,0.812,0.76	0.453,0.563,0.572	0.251
SE.Map4k4.9.46767187.46767379.46766130.46766251.46769648.46769766	1.55292e-10	0.638,0.622,0.695	0.825,0.761,0.847	-0.159
SE.Smtn.14.83758453.83758596.83755141.83755445.83758962.83759150	1.5567e-10	0.854,0.806,0.826	0.95,0.968,0.974	-0.135
SE.Tcf25.19.56210183.56210297.56209746.56209819.56212626.56213310	1.82882e-10	0.857,0.864,0.827	0.948,0.969,0.955	-0.108
SE.Ybx3.4.165617717.165617924.165612316.165612414.165621035.165621158	4.49221e-10	0.234,0.238,0.24	0.122,0.146,0.139	0.102
SE.Hp1bp3.5.156586994.156587183.156581731.156581854.156587558.156587658	1.17505e-09	0.817,0.868,0.874	0.961,0.985,0.971	-0.119
SE.Hp1bp3.5.156586976.156587178.156581731.156581854.156587558.156587658	1.33512e-09	0.538,0.69,0.645	0.887,0.958,0.917	-0.296
SE.Hp1bp3.5.156586976.156587188.156581731.156581854.156587558.156587658	1.73277e-09	0.83,0.876,0.853	0.96,0.987,0.971	-0.12
SE.U2surp.8.103288717.103288849.103284120.103284219.103290555.103290600	2.02812e-09	0.843,0.828,0.797	0.606,0.563,0.653	0.215
SE.Hp1bp3.5.156586994.156587178.156581731.156581854.156587558.156587658	3.19714e-09	0.798,0.853,0.864	0.954,0.983,0.967	-0.13
SE.Piezo1.19.55313726.55313798.55313287.55313388.55314203.55314285	3.93468e-09	0.487,0.506,0.444	0.736,0.648,0.716	-0.221
SE.Clstn1.5.166594594.166594651.166591700.166591863.166596069.166596227	5.64614e-09	0.9,0.925,0.86	0.653,0.805,0.757	0.157
SE.Stk40.5.144138660.144138888.144136396.144136540.144139546.144139599	7.07714e-09	1.0,1.0,1.0	0.972,0.804,0.738	0.162
SE.Myo9b.16.19728841.19728923.19727735.19727814.19730695.19730809	1.18727e-08	0.514,0.527,0.404	0.194,0.161,0.141	0.316
SE.Klc1.6.136362489.136362539.136358018.136358154.136364300.136364431	1.6865e-08	0.311,0.311,0.311	0.154,0.134,0.155	0.163
SE.Itga7.7.3363529.3363649.3363146.3363278.3364518.3364726	1.93388e-08	0.091,0.054,0.137	0.282,0.205,0.249	-0.151
SE.Kifap3.13.82212093.82212159.82190110.82190210.82215919.82217252	2.4038e-08	0.34,0.365,0.37	0.227,0.173,0.147	0.176
SE.Prtfdc1.17.87929429.87929517.87928989.87929066.87931271.87931318	2.8494e-08	0.391,0.402,0.404	0.185,0.251,0.158	0.201
SE.Hp1bp3.5.156586994.156587114.156581731.156581854.156587558.156587658	2.90031e-08	0.744,0.792,0.834	0.932,0.976,0.952	-0.163
SE.Itga7.7.3363146.3363278.3362381.3362637.3363529.3363649	3.3237e-08	0.853,0.939,0.944	0.522,0.706,0.678	0.277
SE.Nexn.2.257468601.257468643.257467160.257467343.257472128.257472277	3.84057e-08	0.92,0.947,0.903	0.73,0.691,0.776	0.191
SE.Rbm43.3.37440532.37440664.37437327.37437407.37442669.37442788	4.61483e-08	0.65,0.567,0.774	1.0,1.0,1.0	-0.336
SE.Uspl1.12.6953362.6953531.6952735.6952864.6956789.6956984	4.82434e-08	0.295,0.238,0.336	0.722,0.607,0.56	-0.34
SE.Fgfr1op2.4.180901627.180901771.180898923.180899083.180904265.180904379	5.78773e-08	0.859,0.896,0.908	0.584,0.764,0.628	0.229
SE.LOC680039.14.79314438.79314507.79309846.79313144.79318372.79318481	7.75287e-08	0.24,0.275,0.217	0.013,0.039,0.061	0.206
SE.Mia2.6.80237035.80237062.80235399.80235471.80237536.80237647	7.91164e-08	0.085,0.031,0.039	0.181,0.312,0.255	-0.198
SE.Map4k4.9.46767321.46767379.46766130.46766251.46769648.46769766	8.06876e-08	0.258,0.258,0.298	0.521,0.435,0.591	-0.244
SE.Macf1.5.141221241.141221337.141219078.141219156.141223277.141223367	8.11434e-08	0.235,0.149,0.388	0.017,0.0,0.019	0.245
SE.Macf1.5.141126954.141127017.141125917.141126159.141130072.141130190	8.47657e-08	0.979,0.981,1.0	0.852,0.799,0.801	0.169
SE.Col4a5.X.112958131.112958140.112956286.112956472.112964677.112964811	1.16291e-07	0.738,0.633,0.763	0.222,0.041,0.28	0.53
SE.Gapvd1.3.13794301.13794382.13791619.13791780.13795723.13795913	1.22845e-07	0.342,0.394,0.24	0.143,0.054,0.102	0.226
SE.Fgfr1op2.4.180901627.180901741.180898940.180899083.180904265.180904379	1.239e-07	0.881,0.915,0.918	0.666,0.815,0.679	0.185
SE.Axl.1.82566983.82567134.82563906.82564039.82568169.82568380	1.52814e-07	0.517,0.682,0.598	0.792,0.82,0.865	-0.227
SE.Fhl1.X.159163468.159163496.159158193.159158298.159167166.159167348	2.587e-07	0.147,0.12,0.156	0.012,0.0,0.02	0.13
SE.Fnip2.2.178273914.178274004.178272369.178272441.178274159.178274260	3.30398e-07	0.704,0.901,1.0	0.441,0.395,0.427	0.447
SE.Stx2.12.31357066.31357191.31355906.31356017.31358638.31360254	4.37117e-07	0.833,0.888,0.831	0.707,0.609,0.57	0.222
SE.Alkbh3.3.82904385.82904538.82903994.82904098.82906521.82906581	4.82038e-07	0.994,0.947,0.962	0.826,0.794,0.868	0.138
SE.Armc5.1.199659981.199660478.199657809.199658596.199661121.199661254	5.24638e-07	0.951,0.945,0.974	0.853,0.818,0.79	0.136
SE.Uspl1.12.6953433.6953531.6952735.6952864.6956789.6956984	6.99422e-07	0.055,0.059,0.164	0.403,0.322,0.316	-0.254
SE.Alkbh3.3.82904385.82904535.82903994.82904098.82906521.82906581	7.08015e-07	0.995,0.96,0.969	0.849,0.804,0.9	0.124
SE.Dysf.4.115789928.115790069.115780480.115780563.115791198.115791314	7.53294e-07	0.379,0.376,0.44	0.184,0.107,0.2	0.235
SE.Dysf.4.115789928.115790091.115780480.115780563.115791198.115791314	8.44122e-07	0.362,0.358,0.422	0.173,0.1,0.19	0.226
SE.Fmnl3.7.140993715.140993748.140992495.140992604.140996289.140996373	8.99094e-07	0.579,0.675,0.764	0.168,0.221,0.208	0.474
SE.Thap1.16.70663116.70663291.70661319.70661812.70665527.70665831	9.91115e-07	0.769,0.797,0.746	0.969,1.0,1.0	-0.219
SE.Rbm43.3.37440474.37440664.37437327.37437407.37442669.37442788	1.00833e-06	0.798,0.774,0.792	1.0,1.0,1.0	-0.212
SE.Pstk.1.201952551.201952846.201950143.201950399.201953080.201953279	1.20348e-06	0.876,1.0,0.916	0.694,0.556,0.428	0.371
SE.Ifnar2.11.31548673.31548830.31546911.31547096.31553955.31554083	1.21728e-06	0.654,0.609,0.752	0.922,0.924,0.876	-0.236
SE.Tnrc6c.10.106739729.106739879.106737961.106738104.106740918.106741056	1.42434e-06	0.675,0.75,0.865	0.99,1.0,0.908	-0.203
SE.Mtmr3.14.84705222.84705249.84703262.84703633.84705931.84706020	1.59453e-06	0.41,0.352,0.396	0.135,0.255,0.151	0.206
SE.Gpx8.2.44906170.44906319.44903336.44903899.44906793.44907030	1.75992e-06	0.504,0.486,0.466	0.759,0.745,0.737	-0.262
SE.Alkbh3.3.82904360.82904538.82903994.82904098.82906521.82906581	2.04506e-06	0.974,0.828,0.835	0.554,0.481,0.565	0.346
SE.Itga7.7.3363557.3363649.3363146.3363278.3364518.3364726	2.14476e-06	0.078,0.045,0.102	0.274,0.182,0.174	-0.135
SE.Dysf.4.115789928.115789967.115780480.115780563.115791198.115791314	2.17104e-06	0.828,0.825,0.846	0.672,0.566,0.684	0.192
SE.Alkbh3.3.82904366.82904538.82903994.82904098.82906521.82906581	2.77403e-06	0.975,0.828,0.837	0.549,0.486,0.58	0.342
SE.Rhot1.10.67539764.67539927.67536053.67536197.67546875.67546950	3.85357e-06	0.692,0.81,0.826	1.0,1.0,0.983	-0.218
SE.Klc1.6.136364300.136364538.136358018.136358154.136373028.136373092	5.20301e-06	0.162,0.15,0.143	0.218,0.328,0.314	-0.135
SE.Alkbh3.3.82904360.82904535.82903994.82904098.82906521.82906581	5.20301e-06	0.986,0.909,0.909	0.666,0.528,0.776	0.278
SE.Alkbh3.3.82904366.82904535.82903994.82904098.82906521.82906581	5.68706e-06	0.987,0.91,0.91	0.665,0.533,0.782	0.276
SE.Vps39.3.112119157.112119190.112118623.112118688.112122226.112122292	6.73663e-06	0.115,0.101,0.101	0.44,0.228,0.34	-0.23
SE.Mbnl1.2.150864085.150864121.150858305.150858459.150867718.150867793	7.56852e-06	0.314,0.204,0.235	0.509,0.464,0.487	-0.236
SE.N4bp2l2.12.632156.632233.628487.628854.632605.632694	8.32764e-06	0.876,0.8,0.762	0.934,0.944,0.953	-0.131
SE.Casp2.4.71658990.71659137.71656777.71656954.71661363.71661492	9.76239e-06	0.148,0.145,0.07	0.02,0.014,0.007	0.107
SE.Eif4a2.11.81378158.81378224.81377278.81377447.81378567.81378719	9.80496e-06	0.632,0.645,0.523	0.817,0.745,0.82	-0.194
SE.Arhgap12.17.54366615.54366690.54362230.54362356.54371339.54371401	1.03057e-05	0.97,0.965,0.918	0.594,0.786,0.708	0.255
SE.Nt5c3b.10.88354756.88354824.88350777.88350863.88354887.88354957	1.0365e-05	0.924,0.969,0.948	0.72,0.762,0.815	0.181
SE.Ltbp1.6.21420729.21420897.21378293.21378518.21448048.21448218	1.04182e-05	0.89,0.671,0.757	1.0,0.942,0.944	-0.189
SE.Abi1.17.90020863.90021025.90017340.90017441.90028199.90028390	1.07586e-05	0.75,0.929,0.851	0.443,0.5,0.473	0.371
SE.Pphln1.7.134656907.134656976.134643600.134643812.134659945.134660025	1.30892e-05	0.37,0.436,0.434	0.671,0.667,0.721	-0.273
SE.Thap1.16.70663116.70663312.70661319.70661812.70665527.70665796	1.30892e-05	0.876,0.858,0.836	0.978,1.0,1.0	-0.136
SE.Osbpl6.3.63412201.63412294.63411343.63411447.63421091.63421257	1.30892e-05	0.722,0.857,0.643	0.13,0.193,0.363	0.512
SE.Kmt2e.4.8242637.8242710.8239218.8239403.8255222.8255379	1.6927e-05	0.353,0.29,0.284	0.096,0.125,0.174	0.177
SE.Zfp532.18.61340352.61340634.61328527.61328704.61361848.61361961	2.11097e-05	0.617,0.538,0.616	1.0,1.0,0.854	-0.361
SE.Prtfdc1.17.87929406.87929517.87928989.87929066.87931271.87931318	2.1783e-05	0.178,0.222,0.255	0.035,0.157,0.062	0.134
SE.Zscan12.17.45281152.45281297.45279161.45280430.45283849.45284256	2.30122e-05	0.825,0.746,0.782	0.985,0.97,0.948	-0.183
SE.Abi1.17.90020851.90021025.90017340.90017441.90028199.90028390	2.70223e-05	0.939,0.982,0.96	0.852,0.839,0.824	0.122
SE.Map3k4.1.48695304.48695466.48694513.48694610.48698199.48698300	2.84912e-05	0.31,0.237,0.344	0.077,0.085,0.135	0.198
SE.Pdlim7.17.9659208.9659225.9658265.9658294.9659478.9659615	2.90423e-05	0.937,0.993,0.928	0.784,0.858,0.835	0.127
SE.NA.13.109661812.109661922.109661403.109661459.109663295.109663364	2.94739e-05	0.892,0.857,0.708	1.0,1.0,0.978	-0.174
SE.Trim65.10.104677193.104677362.104677023.104677089.104677447.104677681	3.42129e-05	0.807,0.739,0.754	1.0,1.0,0.977	-0.226
SE.Trim65.10.104677193.104677314.104677023.104677089.104677447.104677681	3.85682e-05	0.783,0.71,0.743	1.0,1.0,0.972	-0.245
SE.Tpbg.8.93491946.93492156.93491760.93491795.93492832.93495125	4.28155e-05	1.0,0.88,1.0	0.611,0.763,0.737	0.256
SE.Tpbg.8.93491921.93492156.93491760.93491795.93492832.93495125	4.38048e-05	1.0,0.873,1.0	0.595,0.75,0.721	0.269
SE.Gin1.9.111219168.111219331.111212957.111213103.111220632.111220651	4.40377e-05	0.295,0.291,0.269	0.027,0.181,0.058	0.196
SE.Csnk1d.10.110154582.110154645.110151419.110153536.110157630.110157770	4.59766e-05	0.604,0.644,0.713	0.818,0.758,0.798	-0.138
SE.Tpbg.8.93491908.93492156.93491760.93491795.93492832.93495125	4.63891e-05	1.0,0.869,1.0	0.586,0.744,0.715	0.275
SE.Kdm3b.18.27601039.27601639.27597213.27597288.27605543.27606792	4.68935e-05	0.83,0.896,0.891	0.979,0.98,0.991	-0.111
SE.Golim4.2.174346732.174346810.174341920.174342089.174347574.174347657	4.72152e-05	0.89,0.898,0.914	0.735,0.719,0.77	0.159
SE.Cad.6.26660397.26660448.26660065.26660110.26660765.26660862	4.94102e-05	0.342,0.245,0.265	0.133,0.143,0.136	0.147
SE.Plin3.9.10774871.10775070.10773900.10773969.10775227.10775310	5.5583e-05	0.904,0.89,0.91	0.762,0.791,0.841	0.103
SE.Pbrm1.16.7195215.7195371.7188485.7188702.7198286.7198357	5.59896e-05	0.386,0.411,0.46	0.762,0.657,0.574	-0.245
SE.Evi5l.12.2594495.2594528.2593377.2593518.2595555.2595609	5.84842e-05	0.825,0.91,0.636	0.414,0.316,0.411	0.41
SE.Zfp532.18.61335535.61335698.61328527.61328704.61361848.61361961	5.84842e-05	0.506,0.453,0.497	1.0,1.0,0.801	-0.448
SE.Ttc26.4.66127966.66128030.66126426.66126480.66131921.66132005	6.57597e-05	1.0,0.929,1.0	0.692,0.706,0.701	0.277
SE.Myo5a.8.82124445.82124520.82122154.82122353.82125897.82125991	6.7199e-05	0.526,0.541,0.596	0.342,0.319,0.362	0.213
SE.Dysf.4.115848673.115848736.115843195.115843272.115871228.115871327	6.75574e-05	0.274,0.316,0.285	0.208,0.154,0.158	0.118
SE.Abi1.17.90024079.90024166.90017349.90017441.90028199.90028385	6.96401e-05	0.938,0.983,0.958	0.858,0.843,0.828	0.117
SE.Trim65.10.104677193.104677343.104677023.104677089.104677447.104677681	7.21642e-05	0.824,0.76,0.76	1.0,1.0,0.977	-0.211
SE.Taok2.1.198303422.198303529.198303104.198303287.198304243.198304456	7.5933e-05	0.078,0.086,0.125	0.227,0.283,0.18	-0.134
SE.Tpm1.8.72822036.72822115.72820275.72820553.72823429.72823499	7.82764e-05	0.66,0.589,0.56	0.941,0.836,0.833	-0.267
SE.Cd99.20.56195146.56195274.56194975.56195053.56195716.56195770	8.87989e-05	0.829,0.804,0.769	0.672,0.646,0.602	0.161
SE.Inf2.6.137177127.137177212.137176419.137177043.137177563.137177622	9.09346e-05	0.745,0.749,0.719	0.237,0.534,0.237	0.402
SE.Epn2.10.47812221.47812257.47811216.47811327.47812884.47812997	9.1433e-05	0.432,0.377,0.336	0.226,0.192,0.194	0.178
SE.RGD1311739.3.123697909.123698049.123695653.123695774.123702634.123702732	9.50567e-05	0.231,0.128,0.187	0.392,0.313,0.393	-0.184
SE.Pld1.2.113781656.113781770.113780669.113780883.113788384.113788513	0.000103439	0.285,0.336,0.486	0.7,0.586,0.728	-0.302
SE.Ssc5d.1.72451633.72451948.72451181.72451349.72452029.72452593	0.000115211	0.39,0.333,0.405	0.519,0.539,0.569	-0.166
SE.Axl.1.82566746.82566773.82563906.82564039.82566983.82567134	0.000124021	0.525,0.558,0.526	0.641,0.702,0.674	-0.136
SE.Cxadr.11.16856463.16856595.16852693.16852898.16856943.16857099	0.000124401	0.079,0.126,0.063	0.173,0.261,0.322	-0.163
SE.Per1.10.55691175.55691355.55690826.55690954.55691954.55692188	0.000136792	0.745,0.884,0.673	1.0,1.0,0.942	-0.213
SE.Pphln1.7.134656907.134656964.134643600.134643812.134659945.134660025	0.000139571	0.715,0.781,0.726	0.877,0.867,0.899	-0.14
SE.Stx16.3.172176354.172176509.172175468.172175609.172177567.172177659	0.000148163	1.0,1.0,1.0	0.867,0.897,0.816	0.14
SE.RGD1311739.3.123697909.123698074.123695653.123695774.123702634.123702732	0.0001497	0.329,0.188,0.303	0.507,0.439,0.505	-0.21
SE.Ttc7b.6.124356788.124356839.124348882.124349023.124363336.124363434	0.00015325	0.225,0.207,0.286	0.133,0.036,0.059	0.163
SE.Mink1.10.57233074.57233185.57232741.57232911.57233320.57233439	0.000157117	0.653,0.711,0.673	0.876,0.776,0.877	-0.164
SE.Vcan.2.18544062.18546960.18522561.18522675.18552896.18553190	0.000181767	0.23,0.221,0.322	0.623,0.446,0.413	-0.236
SE.Ankrd26.4.150590291.150590390.150589687.150589716.150594440.150594534	0.000191897	1.0,1.0,1.0	0.803,0.7,0.824	0.224
SE.Capn15.10.15334303.15334592.15325014.15326491.15346053.15346236	0.000193973	0.016,0.133,0.035	0.429,0.448,0.209	-0.301
SE.Kdm3b.18.27601039.27601208.27597213.27597288.27605543.27606792	0.000195272	0.664,0.827,0.809	0.954,0.948,0.981	-0.194
SE.Evi5l.12.2594495.2594528.2593377.2593518.2601289.2601350	0.000204331	0.319,0.331,0.188	0.03,0.037,0.08	0.23
SE.Ankdd1b.2.27278671.27278802.27266469.27266568.27278914.27279019	0.000254626	0.946,1.0,1.0	0.897,0.436,0.568	0.348
SE.Plin3.9.10774912.10775070.10773900.10773969.10775227.10775310	0.00025582	0.83,0.813,0.84	0.563,0.665,0.725	0.177
SE.Clstn1.5.166594603.166594651.166591700.166591863.166596069.166596227	0.000258576	0.741,0.778,0.617	0.328,0.547,0.474	0.262
SE.Dmwd.1.79987195.79987270.79985151.79986411.79987514.79987562	0.000262815	0.546,0.478,0.485	0.799,0.747,0.638	-0.225
SE.Prtfdc1.17.87929413.87929517.87928989.87929066.87931271.87931318	0.000272767	0.163,0.198,0.207	0.028,0.154,0.051	0.112
SE.Rbm26.15.89296794.89296866.89295925.89295997.89297167.89297299	0.000273131	0.205,0.13,0.211	0.083,0.025,0.036	0.134
SE.Zfp384.4.157540425.157540552.157539462.157539682.157545395.157545620	0.000273366	0.304,0.4,0.421	0.145,0.201,0.164	0.205
SE.Tango2.11.86839186.86839291.86834017.86834088.86839825.86839941	0.000280651	0.842,0.609,0.472	0.919,1.0,0.963	-0.32
SE.Hyal3.8.116336983.116337036.116336511.116336630.116340361.116341275	0.000285127	0.021,0.0,0.0	0.289,0.059,0.186	-0.171
SE.Rnf111.8.76939377.76939440.76903858.76904745.76939893.76940094	0.000288265	0.469,0.574,0.586	0.246,0.224,0.317	0.281
SE.Sorbs1.1.259382988.259383048.259382218.259382277.259396272.259396467	0.000288265	0.693,0.719,0.772	0.25,0.571,0.279	0.361
SE.Abi1.17.90020848.90021025.90017340.90017441.90028199.90028385	0.000306064	0.935,0.981,0.957	0.847,0.861,0.839	0.109
SE.Csnk1d.10.110154582.110154640.110151419.110153536.110157630.110157770	0.000308518	0.348,0.347,0.42	0.572,0.479,0.544	-0.16
SE.Sema6a.18.41355378.41355543.41333550.41334752.41361134.41361155	0.000308518	0.834,0.665,0.432	0.942,1.0,1.0	-0.337
SE.Alg13.X.115582382.115582742.115565186.115565325.115583350.115583434	0.000308518	1.0,1.0,1.0	0.754,0.65,0.679	0.306
SE.Pphln1.7.134656834.134656964.134643600.134643812.134659945.134660025	0.000318052	0.346,0.441,0.341	0.649,0.601,0.645	-0.256
SE.Rfng.10.109965554.109965735.109965197.109965286.109965808.109965907	0.000334748	0.816,0.871,0.771	0.982,0.916,0.958	-0.133
SE.Dctn4.18.55807583.55807623.55804197.55804376.55810020.55810128	0.000354227	0.775,0.9,0.978	1.0,1.0,0.977	-0.108
SE.Dpf1.1.87254697.87254748.87253687.87253819.87254841.87254961	0.000371148	0.612,0.639,0.603	0.846,0.811,0.907	-0.237
SE.Mark3.6.136125518.136125545.136119649.136119907.136128836.136129661	0.000410291	0.918,0.77,0.951	0.665,0.633,0.589	0.251
SE.Kank2.8.22819710.22819855.22818768.22818883.22821142.22821397	0.000472658	0.735,0.742,0.635	0.845,0.839,0.844	-0.139
SE.Slc25a35.10.55557762.55557915.55557282.55557348.55558225.55558360	0.000495599	0.952,0.724,0.677	1.0,1.0,1.0	-0.216
SE.Zmynd19.3.2167224.2167374.2162108.2162249.2167878.2168370	0.000509395	0.632,0.522,0.551	0.892,0.832,0.865	-0.295
SE.Kidins220.6.44310571.44310604.44304974.44305088.44312349.44312382	0.000526979	0.0,0.019,0.0	0.133,0.127,0.08	-0.107
SE.Rfng.10.109965554.109965663.109965197.109965286.109965808.109965907	0.000526979	0.757,0.851,0.731	0.978,0.892,0.948	-0.16
SE.Il4r.1.196953297.196953382.196942366.196942439.196954751.196954838	0.000571296	0.054,0.069,0.026	0.171,0.249,0.282	-0.184
SE.Klc1.6.136364300.136364431.136358018.136358154.136373028.136373092	0.000587904	0.401,0.401,0.382	0.48,0.623,0.606	-0.175
SE.Ebp.X.15051505.15051864.15049461.15049505.15054171.15054208	0.000592234	0.929,0.94,0.936	0.869,0.767,0.802	0.122
SE.Kansl3.9.42919360.42919438.42917856.42918048.42920693.42921051	0.000599401	0.219,0.33,0.291	0.146,0.107,0.111	0.159
SE.Inpp4a.9.43971339.43971357.43969421.43969530.43974885.43975069	0.000617642	0.034,0.0,0.0	0.0,0.262,0.307	-0.178
SE.Plin3.9.10774871.10775089.10773900.10773969.10775227.10775310	0.00065237	0.843,0.816,0.849	0.683,0.683,0.756	0.129
SE.Raph1.9.67296449.67296525.67295011.67295329.67298702.67298845	0.000668009	0.102,0.161,0.093	0.019,0.0,0.026	0.104
SE.Map4k3.6.3323028.3323091.3314722.3314781.3324174.3324233	0.000677257	0.784,0.751,0.67	0.514,0.579,0.458	0.218
SE.Etl4.17.87676565.87676745.87676375.87676453.87678651.87678777	0.000719516	0.872,0.775,0.899	1.0,1.0,1.0	-0.151
SE.Rfng.10.109965554.109965626.109965197.109965286.109965808.109965907	0.00072232	0.76,0.85,0.699	0.976,0.888,0.949	-0.168
SE.Nhsl1.1.13687062.13687194.13682083.13682276.13696686.13699956	0.000722812	0.408,0.4,0.36	0.222,0.221,0.268	0.152
SE.Dzip3.11.54453389.54453550.54445803.54445851.54454293.54454319	0.000728911	0.27,0.519,0.471	0.188,0.18,0.082	0.27
SE.Usp54.15.4174454.4174619.4173366.4173486.4177373.4178770	0.000728911	1.0,0.906,1.0	0.719,0.767,0.718	0.234
SE.Trim65.10.104677193.104677371.104677023.104677089.104677447.104677681	0.000756963	0.898,0.848,0.833	1.0,1.0,0.985	-0.135
SE.Golgb1.11.66799392.66799500.66797848.66797962.66801331.66801457	0.000759851	0.472,0.542,0.604	0.262,0.333,0.156	0.289
SE.Arhgap17.1.193254021.193254255.193251439.193251609.193255701.193255858	0.000786675	0.95,0.852,0.912	0.802,0.779,0.782	0.117
SE.Acad8.8.28035679.28035849.28034574.28034651.28036624.28036725	0.000806628	1.0,0.937,1.0	0.838,0.738,0.744	0.206
SE.Nab2.7.70966222.70966414.70961574.70965267.70966622.70966755	0.00082743	0.75,0.796,0.713	0.618,0.615,0.668	0.119
SE.Epb41l2.1.20908306.20908396.20902808.20903369.20909566.20909713	0.000832032	0.278,0.172,0.168	0.108,0.127,0.079	0.101
SE.Rad51b.6.102481854.102481971.102479062.102479176.102499243.102499380	0.00090266	0.919,1.0,1.0	0.842,0.887,0.738	0.151
SE.Gin1.9.111219147.111219331.111212957.111213103.111220632.111220651	0.000916439	0.246,0.207,0.125	0.026,0.113,0.048	0.13
SE.RGD1304728.10.58739751.58739833.58733550.58733671.58740914.58741100	0.000930851	1.0,1.0,0.923	0.919,0.823,0.833	0.116
SE.Pdlim7.17.9659208.9659229.9658265.9658294.9659478.9659615	0.00099782	0.597,0.921,0.579	0.258,0.303,0.162	0.458
SE.Ltbp2.6.108512634.108512852.108512407.108512533.108513783.108513909	0.00102238	0.599,0.509,0.539	0.888,0.885,0.855	-0.327
SE.Creb5.4.83833472.83833501.83832824.83832933.83833823.83836351	0.00103718	0.076,0.094,0.271	0.0,0.0,0.0	0.147
SE.Ppfibp1.4.181412641.181412674.181412020.181412192.181414725.181414873	0.00110357	0.67,0.638,0.626	0.343,0.552,0.41	0.21
SE.Fancl.14.110681708.110681752.110676089.110676187.110683106.110683165	0.00116834	0.0,0.0,0.025	0.109,0.102,0.118	-0.101
SE.Srpx.X.14177981.14178041.14173333.14173525.14220501.14220662	0.00126046	0.83,0.859,0.888	0.728,0.672,0.656	0.174
SE.Wls.2.266323933.266324014.266317743.266317865.266353080.266353353	0.00127102	0.462,0.558,0.376	0.289,0.273,0.175	0.22
SE.Usp54.15.4174423.4174619.4173366.4173486.4177373.4178770	0.00127168	1.0,0.96,1.0	0.869,0.809,0.841	0.147
SE.Bard1.9.78334181.78334262.78332644.78332817.78341844.78342782	0.00129063	0.744,0.806,0.778	0.961,0.93,0.891	-0.151
SE.Kdm3b.18.27601039.27601140.27597213.27597288.27605543.27606792	0.00129608	0.588,0.815,0.807	0.948,0.927,0.973	-0.213
SE.Crocc.5.159545315.159545479.159543973.159544189.159545750.159545871	0.00137475	1.0,1.0,1.0	0.821,0.93,0.836	0.138
SE.Hps4.12.50293877.50293974.50292748.50293517.50295218.50295255	0.00139211	1.0,1.0,1.0	1.0,0.673,0.74	0.196
SE.Scrib.7.117120463.117120526.117119840.117119930.117121494.117121866	0.00139595	0.823,0.889,0.897	0.688,0.801,0.672	0.149
SE.Acad8.8.28035679.28035849.28035013.28035123.28036624.28036725	0.00162491	0.916,0.957,0.922	0.701,0.829,0.728	0.179
SE.Tor1aip2.13.73718348.73718575.73708814.73708912.73726427.73726604	0.00162491	0.885,0.89,0.843	0.745,0.718,0.743	0.137
SE.Csnk1g3.18.48905346.48905370.48904722.48904829.48911067.48911122	0.00164362	0.826,0.779,0.715	0.544,0.659,0.58	0.179
SE.Cnot8.10.43539818.43539914.43538159.43538349.43542697.43542903	0.00188352	0.408,0.475,0.45	0.609,0.673,0.608	-0.186
SE.Scmh1.5.139462078.139462144.139459266.139459461.139464811.139464954	0.00192174	0.728,0.787,0.733	0.543,0.447,0.628	0.21
SE.Pbrm1.16.7191813.7191978.7188500.7188702.7198286.7198357	0.00206263	0.214,0.318,0.304	0.537,0.48,0.41	-0.197
SE.Scube3.20.7733927.7733975.7732000.7732144.7735737.7735854	0.00212477	0.629,0.823,0.69	0.919,0.822,0.984	-0.194
SE.Acad8.8.28035013.28035123.28034574.28034651.28036624.28036725	0.00217813	1.0,0.941,1.0	0.907,0.754,0.776	0.168
SE.Nsfl1c.3.146990178.146990399.146988560.146988635.146990924.146991090	0.00221543	0.355,0.2,0.291	0.13,0.196,0.112	0.136
SE.Prc1.1.142106148.142106190.142105652.142105829.142107685.142108746	0.00232189	0.475,0.422,0.497	0.336,0.341,0.356	0.12
SE.Scrib.7.117120463.117120508.117119840.117119930.117121494.117121866	0.00248867	0.524,0.569,0.63	0.343,0.264,0.285	0.277
SE.RGD1560398.12.47555293.47555422.47551934.47552067.47555503.47555589	0.00251279	0.0,0.028,0.098	0.211,0.163,0.116	-0.121
SE.Csnk1d.10.110154582.110154666.110151419.110153536.110157630.110157770	0.00275456	0.359,0.373,0.441	0.586,0.48,0.548	-0.147
SE.Zfp384.4.157540459.157540552.157539441.157539682.157545395.157545620	0.0028035	0.564,0.701,0.674	0.33,0.498,0.416	0.232
SE.Cntrl.3.14339755.14339932.14337584.14337764.14340912.14341029	0.0028035	1.0,0.672,0.492	1.0,1.0,0.954	-0.263
SE.Mdm2.7.60742285.60742419.60737890.60737965.60742591.60742664	0.0028894	0.895,0.94,0.928	0.739,0.795,0.641	0.196
SE.Poc1b.7.41368210.41368291.41357772.41357925.41402820.41404370	0.00300887	1.0,0.953,1.0	0.945,0.587,0.846	0.192
SE.Mettl17.15.28291027.28291122.28290210.28290284.28291786.28291894	0.00320007	0.786,0.373,0.641	0.959,0.902,0.934	-0.332
SE.Ate1.1.201066292.201066421.201041923.201041956.201070041.201070268	0.00341213	0.816,0.786,0.72	0.943,0.968,0.87	-0.153
SE.Dmwd.1.79987147.79987270.79986221.79986411.79987514.79987562	0.00341659	0.285,0.229,0.221	0.574,0.479,0.373	-0.23
SE.Rrp8.1.170576940.170577307.170576277.170576731.170578535.170578693	0.00349337	0.539,0.606,0.704	0.818,0.807,0.866	-0.214
SE.Ncoa1.6.28679955.28680010.28677539.28679870.28683619.28683709	0.00352686	0.805,0.854,0.811	0.597,0.571,0.565	0.246
SE.Clpx.8.70824843.70824885.70823289.70823449.70830019.70830196	0.00355026	0.858,0.934,0.962	0.813,0.768,0.8	0.124
SE.Tango6.19.38893462.38893639.38892004.38892117.38896005.38896135	0.00355026	0.927,0.978,0.947	0.842,0.779,0.75	0.16
SE.Slit2.14.66925882.66925906.66922361.66922512.66926767.66926931	0.00371558	0.9,0.918,0.867	0.709,0.714,0.741	0.174
SE.Cdc42bpa.13.98408417.98408456.98403147.98403224.98419148.98419232	0.00371762	0.063,0.285,0.091	0.06,0.012,0.009	0.119
SE.Chtf8.19.39080840.39080972.39077579.39080441.39081224.39081280	0.00375243	0.832,0.774,0.744	0.609,0.71,0.635	0.132
SE.Fars2.17.29205554.29205617.29139960.29140112.29210724.29210885	0.00379101	0.048,0.018,0.0	0.153,0.111,0.112	-0.103
SE.Cntrl.3.14339752.14339932.14337584.14337764.14340912.14341029	0.0038179	1.0,0.734,0.677	1.0,1.0,0.971	-0.187
SE.Svil.17.55292257.55292338.55288179.55288214.55297975.55298582	0.00383528	0.285,0.205,0.315	0.047,0.152,0.047	0.186
SE.Cast.2.1508220.1508334.1506233.1506323.1508807.1508861	0.00386526	0.679,0.682,0.723	0.567,0.623,0.556	0.113
SE.Hlcs.11.34512128.34512263.34500780.34500943.34526569.34526931	0.00394794	1.0,0.949,1.0	1.0,0.765,0.764	0.14
SE.Lactb.8.72758510.72758676.72750170.72750953.72761270.72761622	0.00403152	0.718,0.776,0.881	0.923,0.894,0.939	-0.127
SE.Leng8.1.73727585.73727636.73727197.73727476.73727860.73728064	0.00414541	0.458,0.437,0.535	0.276,0.347,0.238	0.19
SE.Tecr.19.24707642.24707690.24706996.24707100.24708246.24708297	0.00436162	0.924,0.941,0.712	0.961,1.0,0.986	-0.123
SE.Tmem39b.5.147906342.147906387.147906102.147906186.147906783.147907003	0.00466255	0.0,0.0,0.0	0.08,0.189,0.046	-0.105
SE.Dbr1.8.107833090.107833207.107830901.107830987.107836201.107836282	0.00470979	0.927,0.917,0.795	0.977,1.0,0.99	-0.109
SE.Tead1.1.177654013.177654076.177651556.177651621.177654165.177654228	0.00489185	0.55,0.61,0.503	0.732,0.939,0.722	-0.243
SE.Adgrg6.1.8643571.8643655.8637588.8637674.8646250.8646319	0.00489932	0.609,0.707,0.789	0.384,0.333,0.378	0.337
SE.Cd99.20.56195241.56195271.56194975.56195053.56195716.56195957	0.00495242	0.814,0.79,0.782	0.715,0.622,0.591	0.153
SE.Picalm.1.154444790.154444814.154442036.154442136.154446154.154446214	0.00495953	0.666,0.648,0.705	0.507,0.606,0.545	0.12
SE.Nsfl1c.3.146990160.146990399.146988560.146988635.146990924.146991090	0.00500084	0.336,0.182,0.269	0.122,0.191,0.098	0.125
SE.Adgra2.16.69097318.69097522.69095935.69097208.69097924.69098070	0.00508891	0.861,0.893,0.922	0.806,0.674,0.776	0.14
SE.RGD735065.20.6877772.6877864.6869766.6869896.6883689.6883897	0.00518731	0.874,0.888,0.751	0.953,0.939,0.941	-0.107
SE.Arhgap44.10.51505135.51505186.51502893.51503033.51507870.51508248	0.00530136	1.0,1.0,1.0	0.709,0.926,0.871	0.165
SE.Rarg.7.143851674.143851835.143847080.143847229.143858545.143858871	0.00566009	0.315,0.483,0.469	0.261,0.224,0.258	0.175
SE.Pias3.2.198829799.198829831.198829479.198829632.198830306.198831533	0.0057366	0.939,1.0,1.0	1.0,0.734,0.809	0.132
SE.Kank2.8.22819736.22819855.22818796.22818883.22821142.22821397	0.00574881	0.376,0.399,0.245	0.552,0.564,0.52	-0.205
SE.Carmil1.17.43332254.43332395.43329422.43329491.43338387.43339402	0.00574881	0.348,0.354,0.461	0.639,0.519,0.602	-0.199
SE.Ldb3.16.10908897.10909083.10905691.10905837.10920597.10920634	0.00596897	0.322,0.368,0.361	0.178,0.198,0.215	0.153
SE.Tango2.11.86837576.86837730.86834017.86834088.86839825.86840555	0.00624208	0.893,0.692,0.655	0.902,1.0,0.96	-0.207
SE.RGD1305713.1.143604064.143604275.143601013.143602681.143605983.143606110	0.00633435	0.77,0.932,0.949	1.0,1.0,1.0	-0.116
SE.Mysm1.5.113931267.113931291.113929774.113929853.113931378.113931456	0.00647486	0.843,0.914,0.832	0.483,0.749,0.597	0.253
SE.Carmil1.17.43332226.43332395.43329422.43329491.43338387.43339402	0.00648313	0.217,0.253,0.372	0.542,0.427,0.485	-0.204
SE.Zfand4.4.148233393.148233580.148231239.148231307.148246996.148247144	0.00661538	1.0,0.949,1.0	0.806,1.0,0.746	0.132
SE.Whamm.1.143408480.143408628.143405418.143405592.143417971.143418141	0.00668554	0.84,0.921,0.766	1.0,1.0,0.967	-0.147
SE.Arfip1.2.183535765.183535861.183534320.183534433.183542106.183542215	0.00669986	0.577,0.557,0.636	0.742,0.701,0.729	-0.134
SE.Fam193b.17.9614234.9614622.9613029.9613261.9617326.9617510	0.006728	0.704,0.845,0.886	1.0,0.936,1.0	-0.167
SE.Pvt1.7.102703115.102703168.102648880.102649072.102723272.102723586	0.006728	0.186,0.142,0.246	0.1,0.021,0.019	0.145
SE.Irgm.10.34218702.34218927.34213935.34215579.34221534.34221928	0.00675252	0.664,0.67,0.654	0.925,0.805,0.818	-0.187
SE.Pcgf5.1.255075389.255075450.255069842.255069932.255085634.255085870	0.00693342	0.402,0.384,0.324	0.253,0.233,0.258	0.122
SE.Svil.17.55289394.55290249.55288179.55288214.55292257.55292338	0.00696315	0.809,0.865,1.0	0.534,0.479,0.702	0.32
SE.Tmem175.14.2092029.2092201.2091631.2091860.2099817.2100005	0.00699661	1.0,0.944,1.0	0.75,0.734,0.959	0.167
SE.Jmjd1c.20.22794206.22794331.22793007.22793155.22796062.22796168	0.00701921	0.345,0.474,0.708	0.906,0.853,0.817	-0.35
SE.Nab2.7.70966222.70966354.70961574.70965267.70966622.70966755	0.00701921	0.569,0.619,0.48	0.373,0.373,0.443	0.16
SE.Zmym4.5.144969314.144969360.144942182.144942704.144996049.144996431	0.00713423	1.0,1.0,0.929	0.722,1.0,0.892	0.105
SE.Svil.17.55288834.55288999.55288179.55288214.55289394.55290249	0.00726963	0.132,0.0,0.0	0.478,0.268,0.227	-0.28
SE.Samd8.15.2701451.2701547.2690384.2690535.2705843.2706436	0.00729256	0.858,0.906,0.837	1.0,0.958,0.985	-0.114
SE.Asph.5.22761570.22761630.22737966.22738059.22764802.22764952	0.00729287	0.876,0.781,0.872	0.938,0.904,0.992	-0.102
SE.Rpia.4.98579101.98579161.98577589.98577654.98593369.98593664	0.00754476	1.0,1.0,1.0	0.969,0.773,0.928	0.11
SE.Cxadr.11.16856543.16856595.16852693.16852898.16856943.16857099	0.00768545	0.055,0.071,0.023	0.136,0.102,0.232	-0.107
SE.Ltbp2.6.108514827.108514950.108514480.108514606.108515924.108516044	0.00769037	0.907,0.873,0.778	0.982,0.981,0.994	-0.133
SE.Morf4l1.8.97485264.97485388.97481327.97481408.97487338.97487406	0.0081562	1.0,0.946,0.826	0.805,0.632,0.657	0.226
SE.Klc1.6.136364300.136364431.136357992.136358127.136373028.136373092	0.00828506	0.74,0.741,0.697	0.795,0.862,0.841	-0.107
SE.Ttc3.11.34731009.34731169.34729037.34729139.34733248.34733375	0.00831878	0.95,0.951,1.0	0.765,0.595,0.881	0.22
SE.Nras.2.205560094.205560136.205559564.205559688.205560213.205560791	0.00843144	0.618,0.532,0.571	0.471,0.45,0.451	0.116
SE.Pfkfb2.13.47429287.47429412.47426125.47426333.47430339.47430396	0.00846961	0.863,0.884,0.634	1.0,1.0,0.924	-0.181
SE.RGD1309621.4.183901001.183901125.183896302.183900641.183902121.183902205	0.00862915	0.216,0.214,0.022	0.064,0.039,0.019	0.11
SE.Rbm27.18.36634087.36634252.36626485.36626620.36637822.36637972	0.00906738	0.563,0.517,0.665	0.723,0.863,0.807	-0.216
SE.Anxa1.1.237903951.237904028.237903730.237903839.237909956.237910012	0.00911783	0.957,0.896,1.0	0.9,0.617,0.664	0.224
SE.Zbtb7c.18.72426926.72427046.72305533.72305595.72451782.72452412	0.00917224	0.016,0.047,0.04	0.131,0.518,0.2	-0.249
SE.Parp11.4.160045742.160045815.160042238.160042314.160045898.160046029	0.00930727	0.922,1.0,1.0	0.74,0.918,0.828	0.145
SE.Gpx8.2.44906170.44906303.44903336.44903899.44906793.44907030	0.00941564	0.095,0.073,0.038	0.24,0.254,0.195	-0.161
SE.Zfp516.18.79846403.79846508.79840482.79841934.79853806.79854192	0.00944659	0.271,0.331,0.351	0.504,0.638,0.565	-0.251
SE.Ltbp2.6.108507256.108507388.108506789.108506915.108511841.108511964	0.00947774	0.051,0.128,0.064	0.169,0.298,0.234	-0.153
SE.Fam193b.17.9617725.9617770.9617326.9617510.9618366.9618606	0.00951706	0.329,0.502,0.475	0.223,0.131,0.171	0.26
SE.Fam13b.18.27281346.27281538.27280716.27280929.27282849.27283015	0.00951706	0.76,0.705,0.735	0.805,0.879,0.906	-0.13
SE.Faap24.1.91661886.91662026.91661587.91661740.91662885.91663467	0.00998116	0.784,0.949,0.846	1.0,1.0,0.975	-0.132
SE.Casc4.3.113877006.113877093.113861916.113862070.113885159.113887495	0.0100566	0.757,0.797,0.922	0.525,0.552,0.618	0.26
SE.Atp2a2.12.39600766.39600849.39599332.39599441.39602529.39603326	0.0103209	0.067,0.06,0.008	0.262,0.163,0.103	-0.131
SE.Bcl6.11.80273652.80273820.80272100.80272285.80275343.80275474	0.0103719	0.776,0.941,0.937	1.0,1.0,1.0	-0.115
SE.Numa1.1.167077643.167077867.167073666.167077020.167083448.167083517	0.0106259	0.367,0.412,0.535	0.69,0.697,0.624	-0.232
SE.Vegfa.9.17350286.17350358.17348548.17348578.17351510.17351642	0.0106259	0.391,0.307,0.313	0.143,0.248,0.173	0.149
SE.Afmid.10.106831449.106831540.106828980.106829071.106837102.106837207	0.0111034	0.707,0.792,0.784	1.0,1.0,0.892	-0.203
SE.Atg16l1.9.94897789.94897846.94897115.94897202.94898727.94898830	0.0112097	0.913,0.889,0.897	0.723,0.642,0.822	0.171
SE.Ezh2.4.77343046.77343149.77310635.77310752.77346872.77347011	0.0113438	0.721,0.633,0.341	1.0,0.715,1.0	-0.34
SE.Gon4l.2.188150612.188150756.188141192.188141851.188159756.188159950	0.0113438	0.702,0.496,0.513	0.948,0.85,0.871	-0.319
SE.Phf3.9.37117757.37117919.37110522.37112242.37134324.37134593	0.0113438	0.773,0.707,0.716	0.97,0.862,0.838	-0.158
SE.Trim26.20.2208385.2208403.2206393.2206416.2210010.2210241	0.0116249	0.621,0.533,0.517	0.344,0.451,0.329	0.182
SE.Pdlim5.2.247892769.247892787.247892368.247892460.247894038.247894081	0.0118327	0.227,0.187,0.234	0.695,0.342,0.439	-0.276
SE.Ocrl.X.134785406.134785430.134777468.134777704.134788102.134788219	0.0121369	0.824,0.678,0.773	0.401,0.348,0.424	0.367
SE.Sync.5.147495787.147495864.147482282.147483432.147498271.147498902	0.0122043	0.906,0.777,0.763	0.928,0.966,1.0	-0.149
SE.Cnot8.10.43539792.43539914.43538159.43538349.43542697.43542903	0.0122538	0.304,0.354,0.347	0.471,0.6,0.495	-0.187
SE.Atp2a2.12.39555032.39555158.39553902.39554526.39555265.39555348	0.0123018	0.942,0.98,0.966	0.738,0.952,0.843	0.118
SE.Inpp4a.9.43980213.43980246.43977436.43977575.43984227.43984400	0.0123807	0.653,0.683,0.574	0.24,0.244,0.402	0.341
SE.Map2k7.12.2553348.2553396.2550593.2550735.2555040.2555164	0.0123807	0.681,0.646,0.603	0.821,0.767,0.773	-0.144
SE.Ehbp1l1.1.221075274.221075451.221074640.221074798.221078241.221078282	0.0123807	0.651,0.631,0.633	0.724,0.795,0.744	-0.116
SE.Plpp1.2.44697488.44697643.44664123.44664604.44719465.44719523	0.0124154	1.0,0.462,0.78	0.895,1.0,1.0	-0.218
SE.Bard1.9.78334185.78334262.78332644.78332817.78341844.78342782	0.0124363	0.476,0.602,0.551	0.88,0.834,0.723	-0.269
SE.Slfn13.10.70341660.70341841.70336815.70337022.70342232.70342411	0.012789	0.352,0.784,1.0	1.0,1.0,0.967	-0.277
SE.Lacc1.15.59214439.59214664.59213591.59213757.59215196.59215803	0.0128363	0.925,1.0,1.0	0.854,0.681,0.945	0.148
SE.Sync.5.147496929.147497051.147495787.147495864.147498271.147498902	0.0128363	0.178,0.186,0.162	0.076,0.021,0.108	0.107
SE.Lmo7.15.86439433.86439475.86437557.86437618.86441419.86441445	0.0128529	0.315,0.226,0.277	0.111,0.0,0.024	0.228
SE.Casc4.3.113877006.113877174.113861916.113862070.113885159.113887495	0.0129259	0.824,0.892,0.957	0.71,0.745,0.73	0.163
SE.Ep400.12.52018179.52018419.52017155.52017325.52020030.52020195	0.0129457	0.931,1.0,0.954	0.843,0.757,0.87	0.138
SE.Fgfr1op.1.53142883.53142943.53136481.53136708.53145849.53145930	0.0131419	0.374,0.35,0.452	0.108,0.123,0.209	0.245
SE.Aunip.5.152732286.152732416.152721939.152722130.152733580.152734572	0.0132547	0.522,0.786,0.53	0.886,1.0,0.827	-0.292
SE.Mff.9.90898146.90898305.90893518.90893593.90903419.90903479	0.0133177	0.794,0.74,0.77	0.973,0.917,0.879	-0.155
SE.Mms22l.5.38849861.38849944.38847457.38847507.38850035.38850216	0.0135051	0.969,1.0,1.0	0.909,0.828,0.876	0.119
SE.Inip.5.77029482.77029563.77022029.77022132.77030977.77031120	0.0136523	0.439,0.485,0.425	0.637,0.626,0.62	-0.178
SE.Bpnt1.13.103285240.103285285.103284128.103284220.103287715.103287913	0.0137125	0.182,0.235,0.206	0.131,0.053,0.129	0.103
SE.Slfn13.10.70341660.70341895.70336815.70337022.70342232.70342411	0.0141023	0.358,0.808,1.0	1.0,1.0,0.974	-0.269
SE.Rbck1.3.147799737.147799982.147798709.147798821.147800905.147801079	0.0142005	0.91,0.666,1.0	0.356,0.62,0.478	0.374
SE.Ehbp1l1.1.221075274.221075457.221074640.221074798.221078241.221078275	0.014341	0.657,0.637,0.641	0.731,0.799,0.746	-0.114
SE.Tead1.1.177654173.177654228.177654013.177654076.177667421.177667433	0.014341	0.397,0.566,0.51	0.364,0.189,0.253	0.222
SE.Suco.13.79763846.79763867.79763592.79763648.79765618.79765724	0.0143852	0.666,0.501,0.643	0.428,0.225,0.312	0.282
SE.Scrib.7.117108701.117108764.117107870.117107969.117110124.117110199	0.0146253	0.458,0.472,0.505	0.615,0.583,0.627	-0.13
SE.Rell2.18.31095713.31095953.31094964.31095302.31096313.31096379	0.0147258	0.843,0.821,0.777	0.566,0.502,0.528	0.282
SE.Fam188a.17.79761094.79761175.79740145.79740218.79775881.79775961	0.0149686	0.951,0.977,1.0	0.913,0.73,0.88	0.135
SE.Nab2.7.70966222.70966445.70961574.70965267.70966622.70966755	0.0150247	0.601,0.647,0.518	0.432,0.437,0.478	0.14
SE.Numa1.1.167077643.167077658.167073666.167077020.167083448.167083517	0.0151691	0.282,0.316,0.415	0.628,0.616,0.532	-0.254
SE.Nab2.7.70966222.70966429.70961574.70965267.70966622.70966755	0.0155934	0.609,0.655,0.525	0.442,0.438,0.489	0.14
SE.Aasdh.14.33645807.33645939.33644598.33644721.33646781.33647180	0.0160733	0.732,0.799,1.0	1.0,1.0,0.946	-0.138
SE.Zfp263.10.12028065.12028139.12027663.12027787.12029825.12030416	0.0168108	0.207,0.085,0.281	0.566,0.566,0.363	-0.307
SE.ST7.4.45155451.45155520.45153155.45153231.45157310.45157465	0.0169324	0.147,0.12,0.269	0.077,0.037,0.069	0.118
SE.Atp9b.18.77346013.77346046.77344196.77345263.77347962.77348091	0.0170986	0.107,0.047,0.064	0.192,0.248,0.141	-0.121
SE.Irgm.10.34218702.34218843.34213935.34215579.34221534.34221928	0.0170986	0.498,0.507,0.491	0.87,0.691,0.701	-0.255
SE.Ap1b1.14.85243723.85243789.85230647.85230786.85250043.85250106	0.0175765	0.213,0.332,0.227	0.458,0.434,0.348	-0.156
SE.Mtrf1.15.61664225.61664335.61662263.61662287.61665893.61666319	0.0176392	0.945,0.832,0.86	0.975,0.97,1.0	-0.103
SE.Ube3a.1.116606799.116606919.116604548.116604612.116610499.116610544	0.01796	0.927,0.96,0.927	0.799,0.79,0.788	0.146
SE.Klhl12.13.51291513.51291731.51284245.51284446.51296148.51296298	0.0179996	0.944,1.0,1.0	0.679,1.0,0.87	0.132
SE.Dpagt1.8.48658854.48658878.48657794.48658418.48659109.48659323	0.0183679	0.903,0.935,0.88	0.742,0.784,0.786	0.135
SE.Lactb.8.72758510.72758672.72750170.72750953.72761270.72761622	0.0186777	0.677,0.73,0.825	0.886,0.824,0.914	-0.131
SE.Abcc1.10.632872.633049.628892.629030.672148.672196	0.0187052	0.674,0.746,0.507	0.897,0.786,0.886	-0.214
SE.Relt.1.165887020.165887102.165886620.165886875.165887403.165887484	0.0192831	1.0,0.964,1.0	0.809,0.891,0.937	0.109
SE.Rbm27.18.36634017.36634252.36626485.36626620.36637822.36637972	0.019284	0.377,0.377,0.482	0.574,0.733,0.659	-0.243
SE.Carmil1.17.43332251.43332395.43329422.43329491.43338387.43339402	0.0194685	0.269,0.311,0.419	0.584,0.454,0.54	-0.193
SE.Porcn.X.15038526.15038708.15036334.15036503.15038787.15038918	0.0195816	0.883,0.815,0.796	0.54,0.581,0.548	0.275
SE.Pde3b.1.184050404.184050538.184042641.184042715.184051586.184051724	0.0196618	1.0,0.888,0.784	1.0,1.0,1.0	-0.109
SE.Abhd18.2.127818600.127818739.127813577.127813605.127821276.127821366	0.0200434	0.783,0.905,0.8	1.0,1.0,0.938	-0.15
SE.Mcts1.X.124895734.124895927.124894465.124894643.124896410.124896508	0.0200434	0.792,0.858,0.78	0.94,0.939,0.868	-0.106
SE.Capn7.16.7438822.7438903.7435633.7435888.7442774.7442936	0.0201005	1.0,0.98,0.945	0.962,0.689,0.902	0.124
SE.Zc3h14.6.122764983.122765012.122763493.122763614.122765271.122765467	0.0204315	0.98,0.942,0.939	0.809,0.856,0.838	0.119
SE.Stxbp5.1.3880067.3880133.3879151.3879202.3886243.3886291	0.0206027	0.648,0.445,0.576	0.281,0.203,0.226	0.32
SE.Scmh1.5.139462011.139462144.139459266.139459461.139464811.139464954	0.0206284	0.446,0.549,0.442	0.281,0.144,0.364	0.216
SE.Slc12a8.11.70356257.70356375.70345037.70345200.70359684.70359782	0.0207649	0.881,0.878,1.0	0.639,0.52,0.726	0.291
SE.Rbck1.3.147799737.147799979.147798709.147798821.147800905.147801079	0.0208931	0.908,0.63,1.0	0.333,0.608,0.48	0.372
SE.Sp140.9.92657390.92657432.92655120.92655168.92662115.92662225	0.0208988	0.856,0.889,0.846	0.746,0.733,0.728	0.128
SE.Tatdn1.7.98799531.98799671.98792870.98792956.98802166.98802216	0.0218935	1.0,0.938,0.878	0.789,0.885,0.782	0.12
SE.Arhgap23.10.85394357.85394552.85392067.85393226.85394941.85395053	0.0220192	0.097,0.206,0.526	0.0,0.056,0.056	0.239
SE.Tbc1d1.14.45670211.45670331.45668935.45669075.45673057.45673206	0.0222665	0.343,0.33,0.321	0.151,0.258,0.227	0.119
SE.Fam188a.17.79765386.79765457.79740145.79740218.79775881.79775961	0.0228974	0.954,0.983,1.0	0.933,0.763,0.91	0.11
SE.Baz1a.6.75822504.75822591.75822158.75822383.75827403.75827550	0.0231687	0.921,0.956,1.0	0.717,0.841,0.909	0.137
SE.Mark3.6.136125533.136125545.136119649.136119907.136126995.136127040	0.0235644	0.954,0.855,0.854	0.697,0.664,0.691	0.204
SE.Ccpg1.8.79688758.79688914.79687511.79688580.79691012.79692039	0.0235644	0.613,0.85,0.485	0.722,1.0,0.936	-0.237
SE.Arhgef40.15.28378449.28378571.28377995.28378144.28380631.28380829	0.0240267	0.025,0.027,0.0	0.048,0.21,0.13	-0.112
SE.Fancg.5.58449081.58449199.58448821.58448930.58449595.58449745	0.0241902	1.0,0.904,1.0	0.746,0.718,0.964	0.159
SE.Sec16a.3.3860764.3860824.3859884.3859962.3861539.3861617	0.024436	0.627,0.513,0.499	0.372,0.37,0.413	0.161
SE.Snrk.8.130762664.130762715.130749837.130749952.130767664.130768360	0.0248173	0.905,1.0,0.942	0.764,0.952,0.719	0.137
SE.Orc2.9.65372346.65372375.65364654.65364848.65372962.65373052	0.0248644	1.0,0.961,1.0	0.8,0.901,0.895	0.122
SE.Lrrc40.2.264885454.264885590.264883844.264883953.264888142.264888253	0.0249586	0.979,0.937,1.0	0.927,0.802,0.86	0.109
SE.Prkd3.6.1613962.1614055.1583184.1583323.1622097.1622196	0.0249586	0.886,0.936,0.74	1.0,0.927,0.986	-0.117
SE.Cep104.5.171292563.171292607.171292086.171292177.171294160.171294300	0.0254792	1.0,0.865,0.655	1.0,1.0,1.0	-0.16
SE.RGD1311345.17.6688546.6688617.6684425.6684649.6688996.6690723	0.0265608	0.906,0.964,0.918	0.754,0.849,0.838	0.116
SE.RGD1311739.3.123697909.123698074.123695983.123696045.123702634.123702732	0.0271872	0.777,0.637,0.897	0.888,0.944,1.0	-0.174
SE.Tmem175.14.2092029.2092283.2091821.2091860.2099817.2100005	0.0281984	1.0,0.963,1.0	0.839,0.825,0.977	0.107
SE.Plekha1.1.201477110.201477186.201475855.201475948.201478401.201478813	0.0284929	0.939,0.721,1.0	0.443,0.764,0.497	0.319
SE.Fkbp11.7.140399998.140400049.140398198.140398489.140400384.140400418	0.0296684	0.692,0.659,0.756	0.833,0.856,0.814	-0.132
SE.Prrx1.13.81152938.81153010.81147351.81147486.81156727.81156909	0.0298573	0.564,0.571,0.531	0.497,0.418,0.407	0.115
SE.Ankdd1b.2.27278671.27278802.27270142.27270241.27278914.27279019	0.0299774	0.541,0.365,0.462	0.273,0.146,0.205	0.248
SE.Tjap1.9.17104078.17104176.17097124.17097254.17105319.17105445	0.0302375	0.863,0.665,0.638	0.912,0.934,0.935	-0.205
SE.Capn7.16.7438798.7438903.7435633.7435888.7442774.7442932	0.0311723	1.0,0.98,0.951	0.966,0.719,0.915	0.11
SE.Mus81.1.220864889.220865002.220864670.220864792.220865115.220865253	0.0314035	0.617,0.486,0.614	0.857,0.743,0.782	-0.222
SE.Sdccag3.3.3830019.3830082.3829606.3829746.3831783.3832191	0.0314919	0.728,0.772,0.757	0.7,0.547,0.548	0.154
SE.Pde4dip.2.199921677.199921731.199921293.199921431.199924638.199924727	0.0315938	0.966,0.908,0.818	0.742,0.695,0.74	0.172
SE.Snx14.8.96048730.96048757.96046332.96046465.96049862.96049921	0.0315938	0.255,0.238,0.248	0.428,0.386,0.491	-0.188
SE.Dnaaf3.1.72878278.72878461.72877679.72877900.72878700.72878826	0.0328999	0.812,0.841,0.886	0.946,1.0,1.0	-0.136
SE.Lgals1.7.120154445.120154672.120153183.120153228.120155710.120155882	0.0337045	0.689,0.558,0.718	0.819,0.808,0.788	-0.15
SE.Arrb1.1.164564321.164564345.164563294.164563378.164565921.164565992	0.0337045	0.443,0.506,0.401	0.252,0.374,0.028	0.232
SE.Gon4l.2.188150567.188150756.188141192.188141851.188159756.188159950	0.0343161	0.758,0.56,0.602	0.944,0.878,0.884	-0.262
SE.Clk4.10.36721730.36721796.36720699.36720860.36725382.36725605	0.034393	0.272,0.386,0.311	0.08,0.246,0.087	0.185
SE.Ktn1.15.24543475.24543541.24542211.24542304.24543754.24543838	0.0346233	0.751,0.64,0.821	0.551,0.452,0.577	0.211
SE.Gon4l.2.188150564.188150756.188141349.188141851.188159756.188159950	0.0347363	0.814,0.704,0.684	0.964,0.891,0.924	-0.192
SE.Ppp2r2d.1.211229336.211229366.211227391.211227504.211229463.211229514	0.0348236	0.861,0.518,0.687	0.945,1.0,0.873	-0.251
SE.Piwil2.15.52063059.52063173.52061789.52061978.52065286.52065427	0.0349889	0.907,0.936,1.0	0.881,0.735,0.829	0.133
SE.Mtmr3.14.84706454.84706565.84705931.84706020.84707810.84709215	0.0351111	0.662,0.617,0.583	0.443,0.444,0.528	0.149
SE.Kctd9.15.44431311.44431461.44430478.44430612.44434583.44434689	0.0353618	0.84,0.855,0.867	0.807,0.709,0.736	0.103
SE.Grk5.1.282354438.282354646.282265369.282265658.282396506.282396619	0.0369277	0.899,0.924,0.843	1.0,1.0,1.0	-0.111
SE.Ndufaf6.5.24317661.24317765.24314590.24314713.24320596.24320786	0.0371359	0.983,0.929,0.842	0.831,0.614,0.819	0.163
SE.Bod1l1.14.73788616.73788757.73785717.73785871.73791538.73791656	0.0382292	0.574,0.507,0.528	0.731,0.783,0.656	-0.187
SE.Nat1.16.23984525.23984800.23970742.23972372.23991436.23991573	0.0382292	0.676,0.613,0.602	0.837,0.834,0.878	-0.219
SE.Pkia.2.96619332.96619455.96603830.96603950.96626527.96626641	0.0382292	0.627,0.79,0.905	0.848,0.841,1.0	-0.122
SE.Nktr.8.130369358.130369386.130369004.130369049.130370833.130370921	0.0384977	0.585,0.806,0.555	0.345,0.504,0.243	0.285
SE.Gtpbp4.17.63114342.63114408.63112756.63112906.63116824.63117022	0.0389251	0.837,0.92,0.952	0.704,0.783,0.613	0.203
SE.Fryl.14.37664188.37664233.37660521.37660623.37666595.37666699	0.0390482	0.35,0.168,0.118	0.086,0.051,0.024	0.158
SE.LOC100909712.2.157756799.157756872.157752845.157752966.157758461.157758571	0.0399936	0.356,0.452,0.5	0.31,0.247,0.209	0.181
SE.Qpctl.1.80050339.80050556.80047503.80048604.80052143.80052296	0.0400022	0.809,0.876,0.809	0.933,0.951,0.954	-0.115
SE.Slfn13.10.70341660.70341895.70336558.70337090.70342232.70342411	0.0402888	0.542,0.531,0.389	0.953,0.647,0.693	-0.277
SE.Ccdc66.16.3136873.3136957.3136714.3136740.3137382.3137447	0.0408228	0.078,0.211,0.209	0.081,0.018,0.054	0.115
SE.Ltbp2.6.108512634.108512757.108512407.108512533.108513783.108513909	0.0409338	0.873,0.803,0.739	0.956,0.959,0.945	-0.148
SE.Paqr6.2.187740541.187740586.187740119.187740216.187740890.187741648	0.0413099	0.893,0.886,0.63	1.0,0.883,1.0	-0.158
SE.Pxdc1.17.30983673.30983733.30982692.30982810.30991008.30991120	0.041674	0.221,0.146,0.279	0.099,0.096,0.117	0.111
SE.Cdc42ep2.1.221280343.221280566.221273674.221273796.221281154.221281180	0.0425048	0.548,0.46,0.519	0.393,0.375,0.297	0.154
SE.Irak3.7.64965265.64965325.64960514.64960569.64981952.64982281	0.0427303	1.0,1.0,1.0	0.941,0.885,0.767	0.136
SE.Golgb1.11.66799392.66799515.66797848.66797962.66801331.66801457	0.0443795	0.509,0.481,0.695	0.347,0.371,0.262	0.235
SE.Fnip2.2.178273858.178274004.178272369.178272441.178274159.178274260	0.045288	0.36,0.709,1.0	0.196,0.13,0.209	0.511
SE.Tcf25.19.56210165.56210297.56209746.56209819.56212626.56213310	0.0477421	0.377,0.375,0.26	0.521,0.606,0.514	-0.21
SE.Mfap1a.3.113287499.113287562.113282314.113282452.113288268.113288394	0.0484589	0.955,0.78,1.0	0.64,0.674,0.61	0.27
SE.Plekha1.1.201477127.201477186.201475855.201475948.201478401.201478813	0.048978	0.93,0.716,1.0	0.448,0.778,0.508	0.304
SE.Ktn1.15.24527934.24528025.24523957.24524026.24532908.24532998	0.0492156	0.961,0.858,0.947	0.683,0.933,0.751	0.133
SE.Fam188a.17.79785517.79785578.79777137.79777211.79789405.79789485	0.0498818	0.966,1.0,1.0	0.822,0.91,0.927	0.102
MXE.Pdlim7.17.9658728.9658847.9659208.9659225.9658265.9658294.9659478.9659615	0	0.784,0.767,0.812	0.908,0.909,0.928	-0.127
MXE.Actn1.6.103379313.103379379.103379819.103379900.103378007.103378166.103380858.103381005	0	0.308,0.298,0.322	0.762,0.699,0.745	-0.426
MXE.Actn1.6.103379313.103379376.103379819.103379900.103378007.103378166.103380858.103381005	0	0.54,0.522,0.558	0.888,0.866,0.899	-0.344
MXE.Actn1.6.103379313.103379373.103379819.103379900.103378007.103378166.103380858.103381005	0	0.562,0.541,0.585	0.899,0.879,0.906	-0.332
MXE.Fyn.20.44595880.44596045.44596463.44596573.44592706.44592856.44599140.44599320	0	0.922,0.889,0.943	0.695,0.684,0.653	0.241
MXE.Fbln2.4.122880650.122880752.122882651.122882792.122879991.122880105.122886344.122886479	0	0.674,0.781,0.784	0.913,0.908,0.911	-0.164
MXE.Tpm1.8.72840038.72840164.72840379.72840505.72828263.72828397.72841276.72841496	0	0.527,0.549,0.556	0.238,0.334,0.257	0.268
MXE.AABR07073181.1.5.155853492.155853543.155853919.155854048.155851503.155851664.155854271.155854523	0	0.403,0.402,0.451	0.167,0.209,0.169	0.237
MXE.Rps24.16.760364.760382.761659.761682.759685.759796.762005.762075	0	0.847,0.817,0.902	0.347,0.52,0.382	0.439
MXE.Rps24.16.760364.760382.761662.761682.759685.759796.762005.762075	0	0.146,0.118,0.113	0.027,0.027,0.016	0.102
MXE.Itga7.7.3363146.3363278.3363529.3363649.3362381.3362637.3364518.3364726	5.02191e-13	0.887,0.938,0.897	0.621,0.754,0.72	0.209
MXE.Fyn.20.44595880.44596045.44596417.44596573.44592706.44592856.44599140.44599320	2.54958e-12	0.826,0.775,0.771	0.558,0.567,0.536	0.237
MXE.Elovl1.5.137257479.137257708.137257786.137257979.137255923.137256002.137258385.137258445	2.90553e-12	0.222,0.184,0.311	0.926,0.68,0.878	-0.589
MXE.Tecr.19.24707187.24707232.24707642.24707690.24706996.24707100.24708246.24708297	3.61577e-12	0.258,0.302,0.228	0.069,0.136,0.108	0.158
MXE.Fbln2.4.122880650.122880737.122882651.122882792.122879991.122880105.122886344.122886479	3.76643e-12	0.559,0.651,0.651	0.827,0.827,0.829	-0.207
MXE.Elovl1.5.137257479.137257708.137257830.137257979.137255923.137256002.137258385.137258445	2.35193e-11	0.238,0.218,0.303	0.915,0.691,0.883	-0.577
MXE.Fn1.9.78919401.78919506.78920723.78920879.78916998.78917186.78921563.78921728	1.22032e-10	0.784,0.792,0.805	0.641,0.649,0.701	0.13
MXE.AABR07073181.1.5.155853492.155853543.155853873.155854048.155851503.155851664.155854271.155854523	2.20103e-09	0.53,0.514,0.582	0.341,0.388,0.336	0.187
MXE.Klc1.6.136362489.136362539.136364300.136364538.136358018.136358154.136373028.136373092	2.58952e-09	0.529,0.497,0.518	0.263,0.256,0.316	0.236
MXE.H2afy.17.9326794.9326894.9328642.9328733.9320740.9320848.9332783.9332873	2.61607e-09	0.871,0.876,0.891	0.792,0.719,0.756	0.124
MXE.Itga7.7.3363146.3363278.3363529.3363649.3362381.3362637.3364823.3365017	2.81534e-09	0.91,0.966,0.976	0.69,0.827,0.79	0.182
MXE.Klc1.6.136362489.136362539.136364300.136364431.136358018.136358154.136373028.136373092	9.96634e-08	0.245,0.206,0.225	0.097,0.092,0.121	0.122
MXE.App.11.24435334.24435435.24440976.24441030.24431635.24431782.24447168.24447390	7.83026e-07	0.279,0.272,0.242	0.169,0.168,0.149	0.102
MXE.Nutf2.19.37831236.37831400.37839121.37839238.37830916.37830949.37845351.37845478	3.59163e-06	0.326,0.332,0.202	0.761,0.855,0.779	-0.512
MXE.Arhgef2.2.188002430.188002575.188004522.188004590.187989038.187989132.188004853.188004917	6.64002e-06	0.485,0.487,0.451	0.286,0.349,0.312	0.159
MXE.Itga7.7.3363146.3363278.3363562.3363649.3362381.3362637.3364518.3364726	2.22327e-05	0.935,0.957,0.91	0.756,0.852,0.862	0.111
MXE.Srsf11.2.264849052.264849169.264850004.264850113.264848651.264848761.264852602.264852736	2.71999e-05	0.157,0.052,0.069	0.382,0.4,0.366	-0.29
MXE.Pls3.X.119052026.119052143.119065134.119065209.119030418.119030494.119078761.119078842	0.000105499	0.834,0.727,0.865	0.455,0.474,0.313	0.395
MXE.Myo9b.16.19728833.19728923.19730695.19730809.19727732.19727814.19732535.19732575	0.000106594	0.71,0.675,0.675	0.542,0.495,0.525	0.166
MXE.Nexn.2.257468601.257468643.257472128.257472277.257467154.257467343.257474706.257474733	0.000141329	0.185,0.172,0.216	0.375,0.443,0.5	-0.248
MXE.Wls.2.266317743.266317865.266323933.266324014.266315035.266315328.266353080.266353353	0.000239347	0.392,0.348,0.438	0.529,0.628,0.661	-0.213
MXE.Aldoa.1.198231130.198231283.198231979.198232069.198230798.198230931.198232201.198232344	0.000256849	0.19,0.17,0.07	0.049,0.0,0.022	0.12
MXE.Anxa11.16.3888634.3888868.3896445.3896535.3883947.3884010.3911988.3912148	0.000261513	0.942,0.927,0.83	0.685,0.642,0.521	0.284
MXE.Kifc3.19.10337687.10337818.10338127.10338358.10337500.10337609.10338542.10339178	0.00028482	0.152,0.485,0.495	0.032,0.066,0.026	0.336
MXE.Cep104.5.171292563.171292607.171294160.171294300.171292086.171292177.171294473.171294555	0.000305648	0.948,0.839,0.718	0.978,0.958,1.0	-0.144
MXE.Kifc3.19.10337687.10337818.10338305.10338358.10337500.10337609.10338542.10339178	0.000306414	0.085,0.376,0.416	0.018,0.038,0.016	0.268
MXE.Rapgef1.3.8236999.8237113.8241451.8241630.8236381.8236518.8244433.8244590	0.000453271	0.091,0.125,0.153	0.223,0.218,0.282	-0.118
MXE.Taok2.1.198303422.198303529.198304283.198304456.198303104.198303287.198307521.198307761	0.000581119	0.9,0.908,0.877	0.731,0.709,0.807	0.146
MXE.Crem.17.57050867.57051014.57079357.57079393.57033574.57033692.57082569.57082726	0.000887048	0.254,0.329,0.254	0.592,0.71,0.57	-0.345
MXE.Cspp1.5.8785642.8785783.8794166.8794314.8781927.8782040.8808345.8808475	0.00119561	0.807,0.844,0.909	0.921,1.0,0.985	-0.115
MXE.Supt4h1.10.75034130.75034366.75035870.75035946.75032940.75033047.75037125.75037181	0.00122388	0.267,0.213,0.252	0.103,0.098,0.041	0.163
MXE.Tmem109.1.226929775.226929899.226934189.226934308.226928607.226928852.226935626.226935689	0.00129338	0.979,1.0,0.965	0.881,0.845,0.828	0.13
MXE.Fuz.1.100892990.100893059.100893259.100893364.100892645.100892730.100894874.100894970	0.00147607	0.656,0.582,0.595	0.788,0.921,0.874	-0.25
MXE.Sorbs1.1.259382988.259383048.259396272.259396467.259382218.259382277.259399028.259399154	0.00149746	0.827,0.748,0.8	0.929,0.804,0.977	-0.112
MXE.Eif4a2.11.81375018.81375192.81375416.81375521.81374536.81374643.81375743.81375881	0.00165251	0.034,0.0,0.0	0.097,0.131,0.185	-0.126
MXE.Dut.3.117514953.117515083.117516768.117516860.117514443.117514604.117518836.117518881	0.00181075	0.218,0.333,0.296	0.151,0.15,0.166	0.127
MXE.Rpain.10.57610280.57610295.57610545.57610609.57609249.57609310.57611168.57611309	0.0018201	0.065,0.0,0.107	0.283,0.193,0.223	-0.176
MXE.Tead1.1.177654013.177654076.177654165.177654228.177651556.177651621.177667421.177667433	0.00215155	0.441,0.38,0.431	0.539,0.766,0.637	-0.23
MXE.Prnp.3.124519940.124520061.124527962.124528058.124518258.124518356.124529319.124531316	0.0021579	0.176,0.089,0.04	0.341,0.207,0.257	-0.167
MXE.Wls.2.266317743.266317865.266323936.266324014.266315035.266315328.266353080.266353353	0.00252463	0.534,0.454,0.689	0.735,0.796,0.81	-0.221
MXE.RGD1311739.3.123695983.123696045.123697909.123698074.123695657.123695774.123702634.123702732	0.0026001	0.751,0.626,0.778	0.879,0.832,0.947	-0.168
MXE.RT1-CE1.20.4696010.4696043.4772232.4772262.4638864.4638912.4789668.4789803	0.0028579	0.127,0.025,0.0	0.196,0.113,0.297	-0.151
MXE.Ncdn.5.144778203.144778368.144778821.144778891.144777789.144777930.144779171.144779212	0.0028579	0.887,0.927,0.885	0.789,0.797,0.777	0.112
MXE.Naa35.17.5455149.5455206.5461106.5461249.5452364.5452479.5463034.5463158	0.0029024	0.522,0.609,0.572	0.394,0.385,0.372	0.184
MXE.Pls3.X.119065134.119065209.119076730.119076854.119030418.119030494.119078761.119078842	0.00319011	0.183,0.37,0.17	0.528,0.8,0.648	-0.418
MXE.Alg14.2.224915567.224915697.224916092.224916217.224886636.224886768.224930476.224931459	0.00353322	0.702,0.912,0.898	0.364,0.219,0.571	0.453
MXE.Dnm1l.11.88875170.88875248.88875527.88875560.88874499.88874556.88877123.88877318	0.00359089	0.769,0.88,0.565	1.0,0.834,0.961	-0.194
MXE.Akr1cl.17.69845249.69845355.69847216.69847450.69842571.69842737.69854186.69854309	0.00384933	0.254,0.276,0.27	0.0,0.162,0.072	0.189
MXE.Naa35.17.5455049.5455206.5461106.5461249.5452364.5452479.5463034.5463158	0.004147	0.602,0.693,0.669	0.495,0.474,0.461	0.178
MXE.Map4.8.118118596.118121824.118131929.118132032.118118091.118118205.118139609.118139716	0.00457268	0.227,0.192,0.131	0.405,0.442,0.409	-0.235
MXE.RGD1311739.3.123695983.123696045.123697909.123698049.123695657.123695774.123702634.123702732	0.00470561	0.649,0.515,0.649	0.82,0.742,0.919	-0.223
MXE.Cd38.14.71718479.71718572.71718632.71718698.71718082.71718169.71719903.71719977	0.00536944	0.0,0.0,0.0	0.185,0.062,0.086	-0.111
MXE.Gnb2.12.22229842.22230058.22231112.22231156.22229078.22229217.22231493.22231639	0.00558089	0.934,1.0,1.0	0.866,0.854,0.777	0.146
MXE.Mtmr3.14.84705931.84706020.84706454.84706565.84701558.84703633.84707810.84709215	0.00577507	0.282,0.34,0.39	0.193,0.186,0.209	0.141
MXE.Gnb2.12.22229842.22230006.22231112.22231156.22229078.22229217.22231493.22231639	0.00608334	0.903,1.0,1.0	0.797,0.724,0.759	0.208
MXE.Nutf2.19.37839121.37839238.37844830.37845060.37830916.37830949.37845351.37845478	0.00792724	0.716,0.605,0.616	0.361,0.366,0.218	0.331
MXE.Osbpl11.11.70811584.70811760.70820552.70820621.70810416.70810496.70833087.70833577	0.00811566	0.27,0.253,0.26	0.455,0.446,0.382	-0.167
MXE.Flt3lg.1.101130029.101130083.101130600.101130714.101129299.101129443.101130979.101131046	0.00811566	0.887,0.873,0.879	0.716,0.613,0.685	0.208
MXE.Ciz1.3.11399392.11399471.11400240.11400478.11396069.11396393.11400631.11400791	0.0081249	0.309,0.209,0.31	0.184,0.051,0.102	0.164
MXE.Mff.9.90898146.90898305.90903419.90903479.90893518.90893593.90907017.90907102	0.00945574	0.799,0.761,0.802	0.943,0.916,0.897	-0.131
MXE.Sorbs1.1.259424994.259425096.259429362.259429446.259421032.259421082.259434762.259434877	0.0094889	0.667,0.648,0.455	0.86,1.0,0.854	-0.315
MXE.Mtf2.14.2692720.2692868.2697777.2697978.2685211.2685410.2700739.2700977	0.00965962	0.69,0.688,0.772	0.54,0.45,0.492	0.223
MXE.Wls.2.266317743.266317865.266323913.266324014.266315035.266315328.266353080.266353353	0.0115213	0.538,0.455,0.71	0.713,0.797,0.82	-0.209
MXE.LOC680039.14.79295909.79296044.79314438.79314507.79281828.79282323.79318372.79318481	0.0130913	0.925,0.637,0.515	0.97,0.853,0.983	-0.243
MXE.Gnb2.12.22229808.22230006.22231112.22231156.22229078.22229217.22231493.22231639	0.0140249	0.934,1.0,1.0	0.909,0.853,0.847	0.108
MXE.Fam111a.1.229004159.229004198.229007420.229007546.229003960.229004016.229013458.229013661	0.0183543	0.314,0.082,0.28	0.071,0.055,0.017	0.178
MXE.Fhl1.X.159151176.159151273.159166918.159167068.159132460.159132517.159167166.159167348	0.0184505	0.965,0.962,0.977	0.344,0.83,0.863	0.289
MXE.Ghdc.10.88675975.88676094.88676375.88676653.88675353.88675852.88676983.88677055	0.0191692	0.521,0.605,0.582	0.375,0.459,0.439	0.145
MXE.Tecr.19.24707642.24707694.24708246.24708297.24707187.24707232.24731870.24732024	0.0193213	0.383,0.381,0.529	0.274,0.34,0.264	0.138
MXE.Prnp.3.124519940.124520061.124527962.124528054.124518258.124518356.124529319.124531316	0.0196959	0.296,0.156,0.066	0.517,0.308,0.407	-0.238
MXE.Jmjd1c.20.22793007.22793155.22794206.22794331.22792724.22792917.22796062.22796168	0.0220959	0.445,0.405,0.7	0.884,0.747,0.845	-0.309
MXE.Anxa11.16.3888668.3888868.3896445.3896535.3883947.3884010.3911988.3912148	0.0224147	0.967,0.884,0.93	0.664,0.765,0.675	0.226
MXE.Sdccag3.3.3833388.3833457.3833818.3833968.3832427.3832543.3834051.3834186	0.0282747	0.424,0.565,0.499	0.347,0.203,0.313	0.208
MXE.Trnau1ap.5.150497400.150497520.150502625.150502810.150494229.150494392.150505870.150505968	0.0298259	0.123,0.152,0.097	0.284,0.198,0.193	-0.101
MXE.Mtf2.14.2692720.2692868.2697777.2697974.2685211.2685410.2700739.2700977	0.0305091	0.486,0.487,0.461	0.215,0.199,0.304	0.239
MXE.Rcbtb2.15.55050639.55050697.55051592.55051756.55047015.55047080.55054012.55054168	0.0318172	0.942,0.939,1.0	0.606,0.822,0.905	0.183
MXE.Poc5.2.27006160.27006275.27009094.27009172.27002186.27002346.27011565.27011756	0.0331887	0.072,0.0,0.0	0.196,0.134,0.125	-0.128
MXE.Tank.3.47474983.47475131.47488347.47488459.47439075.47439158.47505223.47505294	0.0342738	0.7,0.61,0.754	0.846,1.0,0.917	-0.233
MXE.RGD1311739.3.123695983.123696048.123697909.123698074.123695648.123695774.123702634.123702732	0.035894	0.817,0.682,0.805	0.917,0.834,0.942	-0.13
MXE.Nfatc3.19.38100618.38100704.38110168.38110237.38090364.38091369.38111339.38111659	0.0364414	0.085,0.17,0.125	0.0,0.0,0.024	0.119
MXE.Dcaf15.19.25214133.25214274.25214346.25214565.25213955.25214047.25216998.25217138	0.0377509	0.41,0.448,0.521	0.323,0.344,0.312	0.133
MXE.Cd44.3.92714971.92715169.92721552.92721678.92712363.92712432.92723096.92723225	0.0381549	0.383,0.291,0.286	0.462,0.56,0.537	-0.2
MXE.Prepl.6.8344361.8344461.8344807.8344901.8335980.8336103.8346087.8346197	0.0387782	0.213,0.309,0.187	0.365,0.362,0.375	-0.131
MXE.Alg13.X.115582382.115582742.115583350.115583434.115565186.115565325.115585267.115585318	0.0391428	0.87,0.866,1.0	0.659,0.61,0.668	0.266
MXE.Nit1.13.89724606.89724670.89725066.89725162.89723861.89723995.89725697.89725806	0.039453	0.792,0.918,0.845	0.891,1.0,1.0	-0.112
MXE.Large1.19.12832729.12832860.12890798.12890899.12796716.12796904.12942558.12942963	0.0407028	0.842,0.914,1.0	0.771,0.429,0.701	0.285
MXE.Cd99.20.56194975.56195053.56195241.56195274.56193289.56193340.56195716.56195770	0.0410129	0.583,0.544,0.505	0.4,0.478,0.445	0.103
MXE.Slc39a13.3.79887095.79887185.79887185.79887386.79886056.79886189.79887958.79888080	0.0419833	0.949,0.836,0.938	0.773,0.84,0.79	0.107
MXE.Ankdd1b.2.27270142.27270241.27278671.27278802.27266469.27266568.27278914.27279019	0.042439	0.697,0.421,0.514	0.333,0.201,0.266	0.277
MXE.Myl6.7.2906574.2906639.2906840.2906957.2906136.2906318.2907350.2907378	0.0462649	0.443,0.51,0.666	0.185,0.0,0.232	0.401
MXE.Ciz1.3.11399392.11399471.11400240.11400490.11396069.11396393.11400631.11400791	0.0462649	0.274,0.172,0.257	0.187,0.04,0.095	0.127
MXE.Col8a1.11.44985946.44986100.44996377.44996427.44953149.44953268.45000515.45000846	0.0465347	0.783,0.787,0.788	0.69,0.593,0.674	0.134
MXE.RGD1311739.3.123695983.123696048.123697909.123698049.123695648.123695774.123702634.123702732	0.0481231	0.732,0.577,0.687	0.874,0.745,0.911	-0.178
MXE.Zfand4.4.148233393.148233580.148246996.148247144.148231239.148231307.148256641.148257817	0.0486238	0.888,0.801,0.638	0.526,0.613,0.523	0.222
MXE.Svil.17.55289394.55290249.55292257.55292341.55288179.55288214.55297975.55298582	0.0492932	0.303,0.153,0.186	0.484,0.465,0.373	-0.227
MXE.Ccdc191.11.61714882.61715073.61728239.61728393.61706124.61706374.61732512.61732736	0.0494051	0.67,0.657,0.575	0.131,0.429,0.408	0.311
A5SS.Serpinh1.1.164307440.164307640.164307550.164307640.164304048.164304710	1.00341e-06	0.732,0.715,0.448	0.96,1.0,1.0	-0.355
A5SS.Tchp.12.47653454.47653638.47653512.47653638.47652522.47652707	3.45849e-06	0.067,0.074,0.029	0.449,0.195,0.324	-0.266
A5SS.Erlin1.1.263845540.263845762.263845673.263845762.263845268.263845392	5.81027e-06	0.012,0.028,0.04	0.123,0.122,0.231	-0.132
A5SS.Dpy19l1.8.25584165.25585591.25585404.25585591.25582937.25584090	0.000168313	0.338,0.412,0.383	0.521,0.669,0.59	-0.216
A5SS.Psmd4.2.196199526.196199644.196199535.196199644.196199176.196199376	0.000215025	0.407,0.384,0.381	0.499,0.538,0.545	-0.137
A5SS.Acta2.1.252549823.252550065.252550033.252550065.252547459.252547611	0.000215025	0.157,0.126,0.146	0.0,0.028,0.05	0.117
A5SS.Ggnbp2.10.72163685.72163895.72163691.72163895.72162586.72162761	0.000433124	0.636,0.658,0.701	0.468,0.541,0.477	0.17
A5SS.Ppt2.20.4390192.4390436.4390341.4390436.4389816.4390007	0.000433124	0.021,0.018,0.025	0.11,0.162,0.139	-0.116
A5SS.Serbp1.4.98032231.98032450.98032231.98032292.98033338.98033413	0.00192864	0.319,0.55,0.348	0.17,0.101,0.102	0.281
A5SS.Wls.2.266426183.266426406.266426183.266426302.266430155.266431216	0.00217059	0.492,0.461,0.522	0.61,0.588,0.626	-0.116
A5SS.Pkig.3.160047295.160047506.160047295.160047340.160110121.160110337	0.00225522	0.365,0.285,0.292	0.127,0.181,0.197	0.146
A5SS.Fbxo22.8.59769993.59770193.59769993.59770137.59770345.59770484	0.00346472	0.919,0.921,0.952	0.824,0.783,0.855	0.11
A5SS.Atp2a2.12.39599320.39599450.39599320.39599441.39602529.39603326	0.00346472	0.336,0.296,0.384	0.579,0.493,0.555	-0.204
A5SS.Actb.12.13717401.13717610.13717401.13717464.13717776.13718215	0.0036218	0.793,0.511,0.612	0.875,0.938,0.918	-0.272
A5SS.Pqlc2.5.157756679.157756849.157756683.157756849.157752942.157753072	0.00370796	0.108,0.046,0.0	0.283,0.146,0.284	-0.186
A5SS.Dhrs1.15.34430950.34431325.34431110.34431325.34428512.34428656	0.00384189	1.0,0.948,0.967	0.719,0.924,0.826	0.149
A5SS.Parp9.11.67752874.67753016.67752982.67753016.67748756.67749610	0.00659444	0.017,0.067,0.0	0.155,0.082,0.175	-0.109
A5SS.Adarb1.20.12075170.12075349.12075170.12075319.12076487.12076656	0.0119084	0.094,0.181,0.139	0.0,0.0,0.067	0.116
A5SS.Anxa1.1.237905738.237905874.237905828.237905874.237903948.237904028	0.0123709	0.204,0.248,0.243	0.073,0.137,0.127	0.119
A5SS.Kmt5c.1.72671004.72671049.72671029.72671049.72668248.72668385	0.0128978	0.041,0.022,0.091	0.175,0.207,0.233	-0.154
A5SS.Fam193b.17.9617725.9617866.9617725.9617770.9618366.9618606	0.0148299	0.429,0.304,0.122	0.63,0.674,0.689	-0.379
A5SS.Nsl1.13.109693800.109693979.109693800.109693868.109695324.109696918	0.0160153	0.032,0.019,0.089	0.113,0.244,0.099	-0.105
A5SS.Tchp.12.47653451.47653638.47653512.47653638.47652522.47652707	0.0231957	0.284,0.116,0.069	0.512,0.274,0.386	-0.234
A5SS.Tgfb1i1.1.199665007.199665108.199665007.199665088.199665320.199665436	0.0244113	0.712,0.663,0.86	1.0,0.84,0.943	-0.183
A5SS.Pdss1.17.90051675.90051789.90051679.90051789.90044323.90044404	0.0276471	0.115,0.103,0.178	0.024,0.0,0.027	0.115
A5SS.Eed.1.154190695.154190854.154190784.154190854.154190007.154190081	0.0437672	0.73,0.783,0.819	0.844,0.923,0.875	-0.103
A5SS.AABR07073038.2.4.118328837.118329841.118328837.118329043.118330532.118330615	0.0484889	1.0,0.924,1.0	0.664,0.835,0.751	0.225
A3SS.Pdlim5.2.247892368.247892787.247892368.247892460.247894038.247894081	0	0.758,0.752,0.801	0.956,0.923,0.924	-0.164
A3SS.LOC687780.1.221420615.221420695.221420644.221420695.221420270.221420371	0	0.665,0.684,0.697	1.0,1.0,0.978	-0.311
A3SS.Axl.1.82563906.82564138.82563906.82564039.82568169.82568380	2.84615e-09	0.09,0.072,0.012	0.287,0.308,0.299	-0.24
A3SS.Fn1.9.78911952.78912024.78911952.78912000.78912688.78912778	8.38258e-09	0.462,0.486,0.467	0.317,0.29,0.334	0.158
A3SS.Fn1.9.78911952.78912075.78911952.78912000.78912688.78912778	1.58763e-08	0.848,0.856,0.853	0.761,0.718,0.766	0.104
A3SS.Mrps10.9.15642931.15643004.15642931.15642995.15643087.15643152	2.93208e-05	0.84,0.823,0.843	0.983,0.921,0.962	-0.12
A3SS.Atp6v0a1.10.88930820.88930924.88930838.88930924.88924738.88924867	4.51399e-05	0.887,0.854,0.809	1.0,1.0,1.0	-0.15
A3SS.Adamtsl4.2.197812316.197812528.197812316.197812411.197814492.197814580	0.00051249	0.501,0.559,0.539	0.283,0.268,0.275	0.258
A3SS.Zfp653.8.23079002.23079218.23079002.23079189.23081595.23081639	0.000583483	0.719,0.739,0.921	1.0,1.0,0.962	-0.194
A3SS.Hdac10.7.130104570.130104815.130104570.130104635.130104940.130104985	0.000721708	0.799,0.838,0.792	1.0,1.0,0.965	-0.179
A3SS.Serpinh1.1.164307482.164307705.164307482.164307640.164308246.164308317	0.00217023	0.444,0.284,0.254	0.841,0.609,0.707	-0.392
A3SS.Gabbr1.20.1981029.1981254.1981029.1981130.1982307.1982493	0.00662865	0.605,0.604,0.638	0.884,0.902,0.903	-0.281
A3SS.Neil3.16.41127921.41128342.41128149.41128342.41126336.41126505	0.00687552	1.0,1.0,1.0	0.85,1.0,0.588	0.187
A3SS.Prdx2.19.26085335.26085535.26085342.26085535.26084902.26084948	0.00828737	0.884,0.876,0.82	1.0,1.0,0.944	-0.121
A3SS.Glyctk.8.114849571.114849747.114849571.114849699.114850336.114850488	0.00828737	0.748,0.781,0.803	1.0,1.0,0.966	-0.211
A3SS.Dut.3.117514932.117515083.117514953.117515083.117514443.117514604	0.0084508	0.668,0.506,0.505	0.783,0.758,0.736	-0.199
A3SS.Ripk3.15.34474274.34474484.34474274.34474379.34476904.34477063	0.0084508	0.749,0.717,0.7	0.842,0.802,0.859	-0.112
A3SS.Gcfc2.4.112685458.112685658.112685544.112685658.112683458.112683571	0.00966118	0.881,0.815,0.636	0.944,0.931,1.0	-0.181
A3SS.Rps2.10.14088834.14088943.14088873.14088943.14088592.14088664	0.00966118	0.374,0.227,0.547	0.207,0.053,0.045	0.281
A3SS.Tmem138.1.226628480.226628652.226628480.226628566.226630604.226630900	0.00991714	0.821,0.7,0.698	0.917,1.0,0.933	-0.21
A3SS.Cenpc.14.23666604.23666759.23666712.23666759.23664161.23664274	0.0112493	0.824,0.834,0.969	0.975,1.0,0.969	-0.106
A3SS.Tmem138.1.226628480.226628744.226628480.226628566.226630604.226630900	0.0115576	0.9,0.781,0.87	0.964,1.0,0.957	-0.123
A3SS.Pvt1.7.102862269.102862481.102862286.102862481.102862066.102862154	0.0115576	0.622,0.842,0.93	1.0,1.0,0.941	-0.182
A3SS.Polr3e.1.190866643.190866705.190866658.190866705.190866270.190866373	0.015504	0.961,1.0,1.0	0.836,0.9,0.789	0.145
A3SS.Ccdc124.16.20321018.20321247.20321077.20321247.20317445.20317917	0.0168842	0.372,0.394,0.305	0.257,0.214,0.214	0.129
A3SS.Slfn13.10.70336815.70337040.70336815.70337022.70342232.70342492	0.0188449	0.718,0.747,1.0	1.0,1.0,0.969	-0.168
A3SS.Fam234b.4.168991285.168991414.168991315.168991414.168988737.168989136	0.0240892	0.232,0.251,0.277	0.08,0.13,0.093	0.152
A3SS.Cep250.3.151521405.151521533.151521469.151521533.151521016.151521210	0.0240892	1.0,1.0,1.0	0.925,0.846,0.832	0.132
A3SS.Rps16.1.85406039.85406247.85406039.85406091.85408083.85408178	0.0253398	1.0,1.0,1.0	0.639,0.8,0.809	0.251
A3SS.Rps16.1.85406039.85406268.85406039.85406091.85408083.85408178	0.0269722	1.0,1.0,1.0	0.623,0.789,0.829	0.253
A3SS.Fgfr1op.1.53136481.53136708.53136481.53136705.53145849.53145930	0.032205	0.695,0.836,0.683	1.0,0.936,0.934	-0.219
A3SS.Rpl9.14.44524704.44524897.44524758.44524897.44524415.44524441	0.0341969	0.297,0.366,0.384	0.138,0.164,0.123	0.207
A3SS.Med16.7.12620690.12620856.12620693.12620856.12619773.12619848	0.0397452	0.869,0.752,0.697	0.885,0.921,0.919	-0.136
A3SS.Med16.7.12620614.12620856.12620693.12620856.12619773.12619848	0.0397452	0.822,0.693,0.65	0.848,0.897,0.89	-0.157
RI.Rsrp1.5.153262432.153264030.153262432.153262569.153263943.153264030	1.89515e-13	0.923,0.913,0.895	0.7,0.7,0.564	0.256
RI.Hmgn3.8.90628208.90629328.90628208.90628678.90629214.90629328	1.70564e-12	0.226,0.254,0.246	0.145,0.093,0.077	0.137
RI.Rpl41.7.2973438.2973640.2973438.2973461.2973605.2973640	0.000532438	0.912,0.942,0.839	0.72,0.785,0.836	0.117
RI.AABR07029863.3.10.56529653.56529820.56529653.56529673.56529790.56529820	0.000549446	0.918,0.953,1.0	0.559,0.844,0.552	0.305
RI.Bcl2l11.3.120729552.120729947.120729552.120729689.120729857.120729947	0.0048147	0.533,0.428,0.629	0.739,1.0,0.847	-0.332
RI.Uimc1.17.10090436.10091173.10090436.10090612.10090972.10091173	0.00689482	0.63,0.527,0.59	0.809,0.877,0.887	-0.275
RI.Zfyve19.3.111015802.111016048.111015802.111015853.111015924.111016048	0.00895978	0.398,0.486,0.623	0.759,1.0,0.911	-0.388
RI.Klhl42.4.181481146.181482027.181481146.181481242.181481817.181482027	0.0142642	0.917,0.898,0.917	0.813,0.575,0.749	0.198
RI.Dph1.10.62019378.62020748.62019378.62020087.62020641.62020748	0.0456446	0.251,0.245,0.278	0.365,0.407,0.377	-0.125

## Sheet: D KD - D Ctr
ASEID	FDR	Psi.D.KD	Psi.D.Ctr	Delta Psi
SE.Mprip.10.46129845.46129896.46129339.46129425.46132876.46133571	0	0.3,0.223,0.363	0.715,0.747,0.699	-0.425
SE.Mprip.10.46129845.46129892.46129339.46129425.46132876.46133571	0	0.642,0.561,0.634	0.919,0.924,0.92	-0.309
SE.Mprip.10.46129830.46129896.46129339.46129425.46132876.46133571	0	0.791,0.727,0.792	0.954,0.96,0.955	-0.186
SE.Mprip.10.46129830.46129892.46129339.46129425.46132876.46133571	0	0.887,0.85,0.88	0.979,0.981,0.979	-0.107
SE.Ppfia1.1.217680291.217680366.217679862.217679946.217681497.217681628	0	0.124,0.124,0.081	0.435,0.421,0.376	-0.301
SE.Ptprf.5.137046364.137046397.137045483.137045581.137048659.137048775	0	0.233,0.215,0.149	0.592,0.578,0.57	-0.381
SE.Fn1.9.78928840.78929005.78927551.78927734.78930417.78930609	0	0.158,0.161,0.159	0.447,0.446,0.467	-0.294
SE.Fn1.9.78928840.78929113.78927551.78927734.78930417.78930609	0	0.228,0.231,0.222	0.559,0.563,0.579	-0.34
SE.Fn1.9.78911952.78912075.78911608.78911715.78912688.78912778	0	0.721,0.737,0.699	0.865,0.877,0.888	-0.158
SE.Fn1.9.78928840.78929002.78927551.78927734.78930417.78930609	0	0.155,0.159,0.157	0.442,0.441,0.463	-0.292
SE.Fn1.9.78911969.78912075.78911608.78911715.78912688.78912778	0	0.7,0.716,0.674	0.853,0.866,0.877	-0.169
SE.Fn1.9.78928840.78928948.78927551.78927734.78930417.78930593	0	0.134,0.134,0.133	0.396,0.395,0.416	-0.269
SE.Fn1.9.78928840.78928930.78927551.78927734.78930417.78930609	0	0.126,0.123,0.127	0.374,0.374,0.394	-0.255
SE.Fn1.9.78928840.78928936.78927551.78927734.78930417.78930609	0	0.131,0.132,0.129	0.391,0.39,0.411	-0.267
SE.Fn1.9.78928840.78928951.78927551.78927734.78930417.78930609	0	0.135,0.136,0.135	0.398,0.397,0.417	-0.269
SE.Fn1.9.78928840.78929064.78927551.78927734.78930417.78930593	0	0.167,0.171,0.164	0.464,0.466,0.481	-0.303
SE.AABR07073181.1.5.155853492.155853543.155851503.155851664.155853919.155854048	0	0.315,0.363,0.359	0.742,0.772,0.786	-0.421
SE.AABR07073181.1.5.155853480.155853543.155851503.155851664.155853919.155854048	0	0.083,0.097,0.108	0.316,0.324,0.397	-0.25
SE.Mbnl1.2.150864085.150864121.150858305.150858459.150864801.150864896	0	0.565,0.608,0.629	0.24,0.211,0.23	0.374
SE.Golim4.2.174346732.174346816.174341920.174342089.174347574.174347657	0	0.796,0.774,0.745	0.952,0.955,0.967	-0.186
SE.Golim4.2.174346732.174346810.174341920.174342089.174347574.174347657	0	0.603,0.584,0.49	0.89,0.898,0.914	-0.342
SE.Actn1.6.103379313.103379379.103378007.103378166.103379819.103379900	0	0.179,0.161,0.174	0.463,0.477,0.448	-0.291
SE.Actn1.6.103379313.103379376.103378007.103378166.103379819.103379900	0	0.171,0.155,0.169	0.457,0.472,0.438	-0.291
SE.Actn1.6.103379819.103379900.103379313.103379379.103380858.103381005	0	0.421,0.435,0.436	0.159,0.149,0.169	0.272
SE.Itga7.7.3363146.3363278.3362564.3362637.3363529.3363649	0	0.323,0.321,0.414	0.853,0.939,0.944	-0.559
SE.Itga7.7.3363557.3363649.3363146.3363278.3364518.3364726	0	0.343,0.388,0.281	0.078,0.045,0.102	0.262
SE.Itga7.7.3363529.3363649.3363146.3363278.3364518.3364726	0	0.385,0.387,0.338	0.091,0.054,0.137	0.276
SE.Clstn1.5.166594594.166594651.166591700.166591863.166596069.166596227	0	0.598,0.617,0.655	0.9,0.925,0.86	-0.272
SE.Clstn1.5.166594545.166594651.166591700.166591863.166596069.166596227	0	0.312,0.315,0.357	0.728,0.772,0.604	-0.373
SE.Clstn1.5.166594603.166594651.166591700.166591863.166596069.166596227	0	0.322,0.316,0.373	0.741,0.778,0.617	-0.375
SE.Fat1.16.50374547.50374583.50372127.50373577.50379255.50379387	0	0.332,0.339,0.295	0.656,0.64,0.652	-0.327
SE.Ect2.2.112825332.112825425.112824222.112824405.112825530.112825610	0	0.67,0.666,0.747	0.955,0.947,0.919	-0.246
SE.Ect2.2.112825332.112825439.112824222.112824405.112825530.112825610	0	0.509,0.455,0.509	0.894,0.898,0.829	-0.383
SE.Flnb.15.18780302.18780341.18779402.18779505.18783400.18783648	0	0.252,0.265,0.172	0.873,0.817,0.908	-0.636
SE.Flnb.15.18780269.18780341.18779402.18779505.18783400.18783648	0	0.511,0.464,0.403	0.948,0.915,0.965	-0.483
SE.Ppfibp1.4.181394960.181394993.181393584.181393699.181396178.181396240	0	0.507,0.465,0.613	0.886,0.909,0.915	-0.375
SE.Macf1.5.141053235.141053253.141050182.141050300.141054741.141054816	3.18592e-13	0.397,0.352,0.368	0.612,0.628,0.614	-0.246
SE.Cd99.20.56195146.56195274.56194975.56195053.56195716.56195957	7.36744e-13	0.449,0.493,0.551	0.829,0.804,0.769	-0.303
SE.Cd99.20.56195241.56195271.56194975.56195053.56195716.56195957	1.86881e-12	0.494,0.454,0.53	0.814,0.79,0.782	-0.303
SE.Fn1.9.78918303.78918573.78916998.78917186.78919401.78919515	4.93447e-12	0.567,0.556,0.565	0.72,0.724,0.72	-0.159
SE.Lrrfip1.9.98243215.98243287.98240694.98240820.98245064.98245235	1.01805e-11	0.366,0.394,0.451	0.61,0.629,0.649	-0.226
SE.Sorbs1.1.259382988.259383048.259382218.259382277.259396272.259396467	4.17816e-11	0.425,0.437,0.365	0.693,0.719,0.772	-0.319
SE.Nf2.14.85011273.85011318.84996904.84999209.85012807.85012973	7.07274e-11	0.68,0.75,0.707	0.934,0.967,0.871	-0.212
SE.Svil.17.55289394.55290249.55288179.55288214.55297975.55298582	3.0853e-10	0.201,0.145,0.073	0.495,0.473,0.598	-0.382
SE.Spns1.1.197772685.197772751.197772344.197772443.197773093.197773283	1.07576e-09	0.764,0.734,0.79	0.941,0.952,0.985	-0.197
SE.Myl6.7.2907014.2907059.2906136.2906318.2907350.2907423	2.05722e-09	0.539,0.537,0.545	0.39,0.385,0.387	0.153
SE.Actn1.6.103379819.103379900.103379204.103379376.103380858.103381005	2.17124e-09	0.961,0.976,0.947	0.827,0.894,0.824	0.113
SE.Flna.X.156477713.156477737.156477365.156477555.156479959.156480207	2.69732e-09	0.601,0.614,0.618	0.441,0.455,0.454	0.161
SE.Myo9b.16.19728833.19728923.19727735.19727814.19730695.19730809	4.22411e-09	0.62,0.543,0.473	0.831,0.859,0.865	-0.306
SE.Hp1bp3.5.156586994.156587183.156581731.156581854.156587558.156587658	3.186e-08	0.979,1.0,0.927	0.817,0.868,0.874	0.116
SE.App.11.24440976.24441030.24435334.24435435.24447168.24447390	5.30314e-08	0.559,0.579,0.551	0.709,0.752,0.67	-0.147
SE.Sgca.10.82780194.82780349.82779949.82780022.82780439.82780559	5.7048e-08	0.686,0.664,0.647	0.828,0.86,0.795	-0.162
SE.Mbnl1.2.150864085.150864121.150858305.150858459.150867718.150867793	5.7048e-08	0.614,0.622,0.503	0.314,0.204,0.235	0.329
SE.Hp1bp3.5.156586976.156587183.156581731.156581854.156587558.156587658	6.94694e-08	0.951,1.0,0.846	0.626,0.748,0.707	0.239
SE.Pbrm1.16.7195215.7195371.7188485.7188702.7198286.7198357	7.71629e-08	0.637,0.699,0.697	0.386,0.411,0.46	0.259
SE.Hp1bp3.5.156586976.156587188.156581731.156581854.156587558.156587658	1.36365e-07	0.977,1.0,0.926	0.83,0.876,0.853	0.115
SE.Nf2.14.85011258.85011318.84996904.84999209.85012807.85012973	1.57723e-07	0.375,0.406,0.399	0.799,0.899,0.673	-0.397
SE.Hp1bp3.5.156586994.156587178.156581731.156581854.156587558.156587658	2.49694e-07	0.975,1.0,0.912	0.798,0.853,0.864	0.124
SE.Arhgap17.1.193245127.193245237.193239039.193239872.193246163.193246715	4.12564e-07	0.16,0.152,0.154	0.042,0.034,0.041	0.116
SE.Sgca.10.82780285.82780349.82779949.82780022.82780439.82780559	5.17964e-07	0.433,0.387,0.378	0.668,0.635,0.586	-0.23
SE.Arhgap17.1.193245127.193245175.193239039.193239872.193246163.193246715	7.73129e-07	0.454,0.399,0.453	0.271,0.199,0.217	0.206
SE.Arhgap17.1.193245127.193245234.193239039.193239872.193246163.193246715	1.10713e-06	0.158,0.154,0.164	0.042,0.039,0.047	0.116
SE.Hp1bp3.5.156586994.156587114.156581731.156581854.156587558.156587658	1.10713e-06	0.967,1.0,0.88	0.744,0.792,0.834	0.159
SE.Paqr6.2.187738400.187738548.187738160.187738276.187738880.187739008	1.74083e-06	0.07,0.078,0.057	0.169,0.241,0.258	-0.154
SE.Camk2g.15.3983819.3983888.3974330.3974374.3985004.3985049	1.74083e-06	0.608,0.719,0.684	0.381,0.41,0.28	0.313
SE.Daam1.6.94672989.94673221.94663179.94663269.94686454.94686526	1.76572e-06	0.176,0.143,0.249	0.035,0.058,0.096	0.126
SE.Inf2.6.137177127.137177212.137176419.137177043.137177563.137177622	2.43472e-06	0.297,0.447,0.278	0.745,0.749,0.719	-0.397
SE.Tecr.19.24707187.24707232.24706996.24707100.24707642.24707694	4.22982e-06	0.818,0.83,0.811	0.717,0.678,0.717	0.116
SE.Fmnl3.7.140993715.140993868.140992495.140992604.140996289.140996373	6.13086e-06	0.821,0.802,0.908	0.939,0.965,0.973	-0.115
SE.Itgb1bp1.6.43360158.43360187.43356909.43357038.43363147.43363335	7.95282e-06	0.488,0.463,0.654	0.864,0.86,0.824	-0.314
SE.Zfp874b.1.37855245.37855356.37853552.37854959.37861572.37861699	9.61911e-06	0.168,0.132,0.165	0.0,0.0,0.0	0.155
SE.Golgb1.11.66799392.66799500.66797848.66797962.66801331.66801457	1.14505e-05	0.143,0.212,0.174	0.472,0.542,0.604	-0.363
SE.Mtmr3.14.84705222.84705249.84703262.84703633.84705931.84706020	1.17439e-05	0.226,0.154,0.191	0.41,0.352,0.396	-0.196
SE.Piezo1.19.55313726.55313798.55313287.55313388.55314203.55314285	1.67407e-05	0.778,0.764,0.614	0.487,0.506,0.444	0.24
SE.Eif4h.12.25105162.25105222.25104178.25104275.25107448.25107586	3.06729e-05	0.531,0.482,0.561	0.398,0.381,0.379	0.139
SE.Sgca.10.82780194.82780305.82779949.82780022.82780439.82780559	3.48702e-05	0.594,0.551,0.534	0.758,0.806,0.68	-0.188
SE.Ppfibp1.4.181412641.181412674.181412020.181412192.181414725.181414873	4.22385e-05	0.477,0.492,0.447	0.67,0.638,0.626	-0.173
SE.Tecr.19.24707187.24707262.24706996.24707100.24707642.24707690	4.28396e-05	0.42,0.495,0.472	0.328,0.276,0.328	0.152
SE.Arhgap23.10.85405522.85405649.85398286.85398430.85405771.85405840	4.73324e-05	0.976,0.978,0.951	0.796,0.88,0.68	0.183
SE.Yif1a.1.220471239.220471344.220470088.220470254.220471472.220471511	5.05075e-05	0.865,0.813,0.815	0.911,0.972,0.977	-0.122
SE.Eif5a.10.56530568.56530662.56528257.56528362.56531392.56531483	6.10984e-05	0.986,0.957,0.919	0.828,0.811,0.712	0.17
SE.Rai14.2.60562422.60562509.60561314.60561401.60563560.60563589	6.23907e-05	0.202,0.213,0.202	0.109,0.075,0.094	0.113
SE.Phf3.9.37117757.37117919.37110522.37112242.37134324.37134593	6.74964e-05	0.981,0.908,0.907	0.773,0.707,0.716	0.2
SE.Klc1.6.136364300.136364431.136358018.136358127.136373028.136373092	9.31977e-05	0.839,0.86,0.869	0.74,0.741,0.697	0.13
SE.Hp1bp3.5.156586976.156587178.156581731.156581854.156587558.156587658	9.31977e-05	0.927,1.0,0.759	0.538,0.69,0.645	0.271
SE.Nsmf.3.2267356.2267470.2266776.2266829.2267915.2268040	0.000210379	0.497,0.846,0.641	0.924,1.0,1.0	-0.313
SE.Dnm1.3.11352633.11352645.11350430.11350544.11352871.11352923	0.000238287	0.099,0.0,0.0	0.315,0.591,0.147	-0.318
SE.Dnm2.8.22522803.22522815.22521891.22521943.22526286.22526400	0.000238287	0.684,0.646,0.698	0.519,0.437,0.509	0.188
SE.Rpap2.14.3198061.3198131.3197804.3197870.3201308.3201423	0.000255893	1.0,1.0,1.0	0.785,0.803,0.93	0.161
SE.Tcta.8.117081417.117081472.117079094.117080369.117081799.117082162	0.000260072	0.802,0.877,0.784	0.657,0.699,0.631	0.159
SE.Rbm26.15.89296794.89296866.89295925.89295997.89297167.89297299	0.000267068	0.036,0.046,0.03	0.205,0.13,0.211	-0.145
SE.Slit2.14.66925882.66925906.66922361.66922512.66926767.66926931	0.000267068	0.623,0.719,0.577	0.9,0.918,0.867	-0.255
SE.Sidt2.8.50238041.50238104.50237208.50237327.50238280.50238352	0.000304474	0.124,0.119,0.141	0.283,0.197,0.24	-0.112
SE.Fmnl3.7.140993649.140993868.140992495.140992604.140996289.140996373	0.000340438	0.676,0.649,0.819	0.869,0.92,0.938	-0.194
SE.Nfu1.4.118817453.118817554.118814283.118814344.118823671.118823738	0.000432164	0.861,0.928,0.802	1.0,1.0,1.0	-0.136
SE.Med7.10.31534893.31535062.31532249.31532475.31535448.31536405	0.00046792	0.943,0.97,1.0	0.744,0.736,0.898	0.178
SE.Klc1.6.136364300.136364431.136358018.136358154.136373028.136373092	0.000494282	0.534,0.491,0.541	0.401,0.401,0.382	0.127
SE.Pdlim7.17.9658728.9658847.9658234.9658294.9659208.9659225	0.000511952	0.799,0.808,0.761	0.679,0.656,0.717	0.105
SE.Rpap2.14.3198064.3198160.3197804.3197870.3201308.3201423	0.00051574	1.0,1.0,1.0	0.809,0.795,0.947	0.15
SE.Atxn7l1.6.52460696.52460759.52460057.52460168.52531795.52531900	0.00051574	0.755,0.636,0.779	0.923,0.918,0.911	-0.194
SE.Syne2.6.99142431.99142500.99141625.99141908.99143406.99143547	0.00063308	0.942,0.753,0.572	1.0,1.0,0.93	-0.221
SE.Mark3.6.136125518.136125545.136119649.136119907.136128836.136129661	0.00063308	0.664,0.64,0.557	0.918,0.77,0.951	-0.259
SE.Medag.12.6715424.6715670.6711746.6713020.6715882.6715995	0.000650944	0.822,0.752,0.756	0.892,0.893,0.932	-0.129
SE.Zfp207.10.67772402.67772495.67770988.67771146.67773346.67773592	0.00103521	0.24,0.239,0.235	0.375,0.331,0.351	-0.114
SE.Trit1.5.140750572.140750610.140750322.140750400.140753532.140753650	0.00108162	0.219,0.105,0.268	0.0,0.036,0.0	0.185
SE.Hacd1.17.81182345.81182467.81177594.81177773.81187237.81187326	0.00108324	0.531,0.512,0.504	0.68,0.701,0.679	-0.171
SE.Spata7.6.122609714.122609810.122603268.122603433.122613986.122614009	0.00109155	0.796,0.756,0.658	0.914,1.0,1.0	-0.235
SE.Polr3gl.2.198706262.198706430.198705828.198705958.198719127.198719202	0.00109155	0.884,0.916,0.865	0.653,0.728,0.708	0.192
SE.Slc9a1.5.151617611.151617649.151613822.151614283.151617811.151617862	0.00111609	1.0,0.948,1.0	0.851,0.825,0.44	0.277
SE.Snrk.8.130762664.130762715.130749837.130749952.130767664.130768360	0.00115034	0.552,0.745,0.767	0.905,1.0,0.942	-0.261
SE.Sgca.10.82780194.82780295.82779949.82780022.82780439.82780559	0.00115298	0.527,0.461,0.472	0.668,0.755,0.608	-0.19
SE.Sdccag3.3.3833818.3833968.3833237.3833457.3834051.3834186	0.00120438	0.29,0.335,0.203	0.62,0.677,0.5	-0.323
SE.Cish.8.116057549.116057770.116054464.116054681.116057992.116060723	0.00172472	0.903,0.706,0.82	0.94,0.981,1.0	-0.164
SE.Stim1.1.167524808.167524901.167522744.167522976.167526833.167526900	0.00211071	0.298,0.299,0.175	0.658,0.413,0.57	-0.29
SE.Abi1.17.90024079.90024166.90017349.90017441.90028199.90028385	0.0021755	0.867,0.812,0.871	0.938,0.983,0.958	-0.11
SE.App.11.24508927.24508984.24497910.24498116.24512164.24512332	0.00217857	0.516,0.525,0.544	0.621,0.639,0.655	-0.11
SE.Dhdh.1.101474797.101474959.101471873.101472126.101476777.101476867	0.00265955	0.917,0.572,0.0	1.0,1.0,1.0	-0.504
SE.Mgmt.1.209307038.209307152.209237232.209237315.209423471.209423632	0.00277219	0.167,0.113,0.171	0.0,0.056,0.0	0.132
SE.Ercc6.16.8766162.8766321.8760509.8760635.8772185.8772321	0.00284716	1.0,0.875,1.0	0.641,0.935,0.7	0.2
SE.Rbks.6.26081723.26081787.26074556.26074689.26082810.26082873	0.00304035	0.93,0.706,0.801	1.0,0.966,1.0	-0.176
SE.Camk2g.15.3983819.3983846.3974330.3974374.3985004.3985049	0.0034044	0.235,0.28,0.256	0.062,0.091,0.065	0.184
SE.Rhot1.10.67638087.67638231.67630141.67630264.67639564.67639880	0.00340851	0.192,0.316,0.121	0.424,0.663,0.541	-0.333
SE.Patz1.14.83514434.83514526.83513280.83513344.83519236.83519405	0.00379599	0.463,0.39,0.385	0.151,0.188,0.299	0.2
SE.Slc4a7.15.11878804.11879173.11874561.11874677.11881741.11881930	0.00387312	0.04,0.024,0.0	0.116,0.135,0.158	-0.115
SE.Abi1.17.90020848.90021025.90017340.90017441.90028199.90028385	0.00403826	0.871,0.801,0.88	0.935,0.981,0.957	-0.107
SE.Spata7.6.122607271.122607346.122603268.122603433.122613986.122614034	0.00404171	0.765,0.839,0.709	0.935,1.0,1.0	-0.207
SE.Sorbs1.1.259463206.259463239.259459398.259459540.259469135.259469248	0.00410972	0.308,0.347,0.35	0.568,0.673,0.544	-0.26
SE.Pafah1b1.10.61509008.61509086.61498388.61498597.61576287.61576952	0.00493814	0.204,0.215,0.186	0.033,0.023,0.036	0.171
SE.Fnip2.2.178273914.178274004.178272369.178272441.178274159.178274260	0.00550448	0.603,0.433,0.603	0.704,0.901,1.0	-0.322
SE.Trim65.10.104677193.104677314.104677023.104677089.104677447.104677681	0.0055912	0.897,1.0,1.0	0.783,0.71,0.743	0.22
SE.Sema6a.18.41355378.41355543.41333550.41334752.41361134.41361155	0.00587161	1.0,0.941,0.834	0.834,0.665,0.432	0.281
SE.Trim65.10.104677193.104677362.104677023.104677089.104677447.104677681	0.00587161	0.908,1.0,1.0	0.807,0.739,0.754	0.203
SE.Tmem68.5.16388721.16388841.16387435.16387496.16392521.16392715	0.00587937	0.146,0.23,0.349	0.081,0.136,0.007	0.167
SE.Sbf1.7.130269721.130269799.130269171.130269353.130272497.130272650	0.00624547	0.628,0.654,0.567	0.828,0.713,0.787	-0.16
SE.Arhgef10l.5.159072315.159072330.159071900.159072082.159074506.159074679	0.0062794	0.644,0.702,0.597	0.508,0.47,0.535	0.143
SE.Dhdh.1.101474797.101474961.101471873.101472126.101476777.101476867	0.00640078	0.941,0.627,0.103	1.0,1.0,1.0	-0.443
SE.Btaf1.1.255622597.255622789.255621452.255621627.255623230.255623434	0.00678352	0.15,0.272,0.144	0.047,0.041,0.126	0.117
SE.Pde3b.1.184050398.184050500.184042641.184042715.184051586.184051724	0.00774831	1.0,1.0,1.0	1.0,0.864,0.716	0.14
SE.Lgals1.7.120154445.120154672.120153183.120153228.120155710.120155882	0.00814497	0.847,0.779,0.849	0.689,0.558,0.718	0.17
SE.Map2k7.12.2553348.2553396.2550593.2550735.2555040.2555164	0.00832018	0.766,0.843,0.85	0.681,0.646,0.603	0.176
SE.Zfp507.1.92110490.92112574.92108828.92108943.92118420.92118511	0.00834676	0.868,1.0,1.0	0.852,0.504,0.776	0.245
SE.Slfn13.10.70337408.70337518.70336023.70337090.70342232.70342411	0.00907681	0.506,0.54,0.606	0.328,0.104,0.175	0.348
SE.Bcl2l12.1.100988099.100988189.100984549.100985248.100988284.100988371	0.00959568	0.095,0.123,0.173	0.029,0.026,0.0	0.112
SE.Myo9b.16.19728841.19728923.19727732.19727814.19730695.19730809	0.010275	0.332,0.182,0.13	0.514,0.527,0.404	-0.267
SE.Galnt10.10.43208167.43208334.43206601.43206718.43208833.43210427	0.0105111	0.848,0.837,0.82	1.0,0.977,0.918	-0.13
SE.Carmil1.17.43332226.43332395.43329422.43329491.43338387.43339402	0.0106895	0.504,0.448,0.417	0.217,0.253,0.372	0.176
SE.Prr3.20.3300716.3300794.3300246.3300385.3301061.3301124	0.0109232	0.285,0.346,0.311	0.524,0.458,0.631	-0.224
SE.NA.10.109891683.109891737.109891382.109891448.109891824.109891879	0.0109232	0.888,1.0,0.972	0.866,0.786,0.71	0.166
SE.Trim65.10.104677193.104677343.104677023.104677089.104677447.104677681	0.0111713	0.909,1.0,1.0	0.824,0.76,0.76	0.188
SE.Map4k4.9.46767187.46767379.46766130.46766251.46769648.46769766	0.0111855	0.756,0.763,0.745	0.638,0.622,0.695	0.103
SE.LOC103689961.1.77806353.77806398.77806097.77806172.77806525.77806540	0.011246	0.321,0.316,0.416	0.638,0.557,0.611	-0.251
SE.Pacsin3.3.80076324.80076385.80072488.80072538.80076527.80076720	0.0117338	0.98,1.0,0.982	0.72,1.0,0.887	0.118
SE.Nectin2.1.80640187.80640372.80636846.80637000.80646507.80646708	0.0117338	0.666,0.678,0.848	0.604,0.507,0.525	0.185
SE.Pias3.2.198829799.198829831.198829479.198829632.198830306.198831533	0.0120803	0.869,0.877,0.825	0.939,1.0,1.0	-0.123
SE.Pkd1.10.13953436.13953550.13952710.13952837.13953657.13953707	0.0121793	0.28,0.245,0.328	0.41,0.416,0.421	-0.131
SE.Med25.1.100876160.100876232.100875844.100876063.100876502.100876691	0.012281	0.665,0.71,0.615	0.77,0.788,0.791	-0.12
SE.Carmil1.17.43332254.43332395.43329422.43329491.43338387.43339402	0.0127944	0.584,0.551,0.526	0.348,0.354,0.461	0.166
SE.Stag2.X.128494955.128495090.128493613.128493974.128550176.128550315	0.0143062	0.304,0.294,0.056	0.48,0.507,0.396	-0.243
SE.Abi3bp.11.46298665.46298740.46297624.46297696.46299788.46299863	0.0143458	0.667,0.547,0.619	0.445,0.333,0.453	0.201
SE.Pdlim5.2.247892769.247892787.247892368.247892460.247894038.247894081	0.0155788	0.459,0.393,0.28	0.227,0.187,0.234	0.161
SE.Tango2.11.86837576.86837730.86834017.86834088.86839825.86840555	0.0155788	0.953,1.0,0.885	0.893,0.692,0.655	0.199
SE.Trim65.10.104677193.104677371.104677023.104677089.104677447.104677681	0.0155788	0.952,1.0,1.0	0.898,0.848,0.833	0.124
SE.Bbs2.19.11415662.11415719.11413928.11414041.11419828.11419977	0.0158268	0.0,0.017,0.034	0.0,0.124,0.283	-0.119
SE.Rnaseh2a.19.26084294.26084357.26082695.26082901.26084483.26084679	0.0163065	0.175,0.224,0.295	0.098,0.042,0.183	0.124
SE.Ltbp1.6.21420729.21420897.21378293.21378518.21448048.21448218	0.0164812	0.921,0.94,1.0	0.89,0.671,0.757	0.181
SE.Trim23.2.34257849.34257930.34255316.34255474.34258824.34258987	0.0171979	0.049,0.067,0.127	0.309,0.219,0.174	-0.153
SE.Gkap1.17.6786403.6786584.6785427.6785595.6794837.6795095	0.0174083	0.065,0.285,0.064	0.376,0.316,0.395	-0.224
SE.Camk2g.15.3988948.3989062.3987652.3987701.3990995.3991071	0.0185411	0.039,0.101,0.054	0.139,0.249,0.118	-0.104
SE.Acad8.8.28035679.28035849.28035013.28035123.28036624.28036725	0.0187258	0.835,0.808,0.66	0.916,0.957,0.922	-0.164
SE.RGD1562136.9.111335177.111335223.111327401.111327576.111344965.111347430	0.0187258	0.963,0.953,1.0	0.78,0.909,0.759	0.156
SE.Golgb1.11.66799392.66799497.66797848.66797962.66801331.66801457	0.0188821	0.16,0.182,0.236	0.445,0.385,0.533	-0.262
SE.Sorbs1.1.259462867.259463026.259459398.259459540.259469135.259469248	0.0194209	0.173,0.167,0.135	0.286,0.455,0.408	-0.225
SE.Pard3.19.60366558.60366603.60365391.60365540.60370735.60370963	0.0199677	0.88,0.751,0.883	1.0,0.943,1.0	-0.143
SE.Adam12.1.206016846.206017069.206001086.206001264.206022001.206022150	0.0200183	0.047,0.072,0.403	0.018,0.033,0.028	0.148
SE.Osbpl10.8.123173218.123173410.123131185.123131265.123230579.123230790	0.0211841	1.0,0.917,1.0	0.909,0.746,0.898	0.121
SE.Mtmr11.2.198304132.198304343.198303774.198303865.198304589.198304650	0.0212443	0.897,1.0,1.0	0.563,0.741,1.0	0.198
SE.Adgrl2.2.258828081.258828120.258825483.258825667.258828859.258829045	0.021371	0.696,0.744,0.63	0.817,0.843,0.83	-0.14
SE.Cad.6.26660397.26660448.26660065.26660110.26660765.26660862	0.021684	0.181,0.149,0.169	0.342,0.245,0.265	-0.118
SE.Zdhhc1.19.37429732.37429826.37429518.37429597.37430011.37430094	0.0218547	0.715,0.593,0.688	0.957,0.866,0.817	-0.215
SE.Rab11fip5.4.117118678.117120685.117115524.117115714.117125619.117126304	0.0219886	0.349,0.359,0.304	0.435,0.515,0.475	-0.138
SE.Carmil1.17.43332251.43332395.43329422.43329491.43338387.43339402	0.0219886	0.555,0.506,0.454	0.269,0.311,0.419	0.172
SE.NA.13.109661812.109661922.109661403.109661459.109663295.109663364	0.0221939	0.985,0.975,0.936	0.892,0.857,0.708	0.146
SE.Gjc1.10.90786844.90787046.90784281.90784357.90912104.90912287	0.0227121	0.18,0.268,0.092	0.449,0.516,0.449	-0.291
SE.Csnk1g3.18.48905346.48905370.48904722.48904829.48911067.48911122	0.0230196	0.584,0.547,0.674	0.826,0.779,0.715	-0.172
SE.Adgrg6.1.8598322.8598368.8593074.8596128.8599579.8599732	0.0233632	0.862,0.491,0.927	1.0,0.955,0.849	-0.175
SE.Map4k4.9.46756870.46757032.46755903.46756119.46759177.46759402	0.0241934	0.962,0.966,0.898	0.815,0.813,0.874	0.108
SE.Phldb1.8.49009515.49009560.49008610.49008905.49010003.49010127	0.0261878	0.38,0.355,0.289	0.239,0.217,0.219	0.116
SE.Fuz.1.100894602.100894800.100893259.100893364.100894874.100894970	0.0268438	0.937,0.954,0.918	0.751,0.86,0.823	0.125
SE.Evi5l.12.2594495.2594528.2593377.2593518.2595555.2595609	0.028006	0.395,0.388,0.64	0.825,0.91,0.636	-0.316
SE.Ldb3.16.10908897.10909083.10905691.10905837.10920597.10920634	0.028846	0.126,0.146,0.312	0.322,0.368,0.361	-0.156
SE.Pld1.2.113781656.113781770.113780669.113780883.113788384.113788513	0.0288613	0.625,0.556,0.658	0.285,0.336,0.486	0.244
SE.Sorbs1.1.259462867.259463239.259459398.259459540.259469135.259469248	0.0288613	0.358,0.332,0.29	0.491,0.633,0.53	-0.225
SE.Arhgef6.X.159732989.159733115.159730190.159730284.159734207.159734353	0.0289948	1.0,0.943,1.0	0.769,0.903,0.848	0.141
SE.Pstk.1.201952551.201952846.201950143.201950399.201953080.201953279	0.029156	0.813,0.688,0.764	0.876,1.0,0.916	-0.176
SE.Mark3.6.136126995.136127040.136119649.136119907.136128836.136129631	0.029156	0.721,0.759,0.729	0.936,0.796,0.953	-0.159
SE.Wdyhv1.7.97962751.97962900.97961696.97961821.97965697.97965748	0.029156	0.96,0.765,0.794	0.967,1.0,1.0	-0.149
SE.Abi1.17.90020863.90021025.90017340.90017441.90028199.90028385	0.0294486	0.514,0.492,0.721	0.75,0.929,0.851	-0.268
SE.Cbfa2t2.3.150002100.150002243.149935730.149935882.150005718.150005862	0.0295181	0.275,0.33,0.247	0.203,0.065,0.135	0.15
SE.Nat1.16.23984525.23984800.23970742.23972372.23991436.23991573	0.0318865	0.819,0.892,0.866	0.676,0.613,0.602	0.229
SE.Pbrm1.16.7195215.7195371.7191813.7191978.7198286.7198357	0.0322476	0.948,0.97,1.0	0.882,0.847,0.84	0.116
SE.Wdr70.2.57190702.57190825.57179179.57179300.57191392.57191476	0.0325295	0.256,0.335,0.255	0.419,0.491,0.351	-0.138
SE.Pde3b.1.184050404.184050538.184042641.184042715.184051586.184051724	0.0330859	1.0,1.0,1.0	1.0,0.888,0.784	0.109
SE.Morf4l1.8.97485264.97485388.97481327.97481408.97487338.97487406	0.0335199	0.694,0.731,0.864	1.0,0.946,0.826	-0.161
SE.Slfn13.10.70341660.70341895.70336815.70337022.70342232.70342411	0.0336785	0.927,1.0,1.0	0.358,0.808,1.0	0.254
SE.Gpx8.2.44906170.44906319.44903336.44903899.44906793.44907030	0.0337872	0.65,0.687,0.638	0.504,0.486,0.466	0.173
SE.Mast2.5.135176735.135176756.135173505.135173584.135180264.135180340	0.0347705	0.068,0.167,0.13	0.255,0.271,0.175	-0.112
SE.Tbc1d1.14.45670211.45670331.45668935.45669075.45673057.45673206	0.0354433	0.217,0.216,0.158	0.343,0.33,0.321	-0.134
SE.Map4k4.9.46767321.46767379.46766130.46766251.46769648.46769766	0.0357254	0.431,0.342,0.439	0.258,0.258,0.298	0.133
SE.Pusl1.5.173336675.173336884.173336033.173336421.173337515.173337691	0.0362296	0.839,0.767,1.0	0.367,0.561,0.523	0.385
SE.Gapvd1.3.13794301.13794382.13791619.13791780.13795723.13795913	0.0363416	0.161,0.163,0.225	0.342,0.394,0.24	-0.142
SE.Epn2.10.47812221.47812257.47811216.47811327.47812884.47812997	0.0372443	0.247,0.252,0.148	0.432,0.377,0.336	-0.166
SE.Agfg2.12.22106799.22106832.22105836.22105962.22110829.22110950	0.0425506	0.159,0.157,0.212	0.022,0.071,0.065	0.123
SE.Kat5.1.220973860.220974016.220973696.220973771.220974302.220974439	0.0427166	0.375,0.393,0.439	0.301,0.246,0.314	0.115
SE.Sapcd1.20.5019568.5019708.5018992.5019085.5019930.5020026	0.0429315	0.954,1.0,0.943	0.789,0.689,1.0	0.14
SE.Cep120.18.48691689.48691879.48691147.48691237.48693214.48693373	0.0435559	0.097,0.207,0.165	0.046,0.064,0.038	0.107
SE.Erbb2.10.86382959.86383159.86382751.86382842.86383860.86383951	0.0455097	0.937,0.966,0.883	0.696,0.772,0.905	0.138
SE.Trnau1ap.5.150502625.150502810.150499376.150499508.150506776.150506871	0.0468661	1.0,1.0,1.0	0.717,1.0,0.91	0.124
SE.Tcf25.19.56212291.56212517.56209746.56209819.56212626.56213310	0.0478482	0.432,0.538,0.64	0.342,0.351,0.306	0.204
SE.Slc35d2.17.1640649.1640736.1635636.1635708.1642972.1643006	0.0482098	0.778,0.954,0.876	1.0,1.0,1.0	-0.131
SE.Aldh5a1.17.42140846.42140930.42133075.42133409.42142281.42142452	0.0486323	0.856,0.882,0.852	0.964,1.0,1.0	-0.125
SE.Uspl1.12.6944080.6944194.6941068.6941198.6949056.6949660	0.0486323	0.801,0.938,0.693	0.971,0.9,1.0	-0.146
SE.Cdc42bpa.13.98408417.98408456.98403147.98403224.98419148.98419232	0.0489064	0.044,0.027,0.027	0.063,0.285,0.091	-0.114
SE.Smtn.14.83758549.83758618.83755141.83755445.83758962.83759150	0.0489064	0.868,0.886,0.863	0.805,0.731,0.779	0.101
SE.Erbb2.10.86383638.86383771.86382751.86382842.86383860.86383951	0.0489867	0.947,0.941,0.899	0.777,0.769,0.841	0.133
SE.Sdccag3.3.3833818.3833930.3833237.3833457.3834051.3834186	0.0495202	0.168,0.15,0.0	0.301,0.388,0.319	-0.23
SE.Fam149b1.15.4382790.4382978.4377937.4378071.4388317.4388476	0.0495202	0.928,0.927,0.933	0.683,0.875,0.724	0.169
MXE.AABR07073181.1.5.155853492.155853543.155853919.155854048.155851503.155851664.155854271.155854523	0	0.132,0.184,0.19	0.403,0.402,0.451	-0.25
MXE.Actn1.6.103379313.103379379.103379819.103379900.103378007.103378166.103380858.103381005	0	0.64,0.665,0.654	0.308,0.298,0.322	0.344
MXE.Actn1.6.103379313.103379376.103379819.103379900.103378007.103378166.103380858.103381005	0	0.826,0.839,0.823	0.54,0.522,0.558	0.289
MXE.Actn1.6.103379313.103379373.103379819.103379900.103378007.103378166.103380858.103381005	0	0.839,0.846,0.835	0.562,0.541,0.585	0.277
MXE.Actn1.6.103379204.103379379.103379819.103379900.103378007.103378166.103380858.103381005	0	0.886,0.896,0.902	0.667,0.653,0.674	0.23
MXE.Itga7.7.3363146.3363278.3363529.3363649.3362381.3362637.3364823.3365017	0	0.465,0.483,0.585	0.91,0.966,0.976	-0.44
MXE.Itga7.7.3363146.3363278.3363529.3363649.3362381.3362637.3364518.3364726	0	0.459,0.458,0.54	0.887,0.938,0.897	-0.422
MXE.H2afy.17.9326794.9326894.9328642.9328733.9320740.9320848.9332783.9332873	7.69508e-13	0.741,0.718,0.737	0.871,0.876,0.891	-0.147
MXE.Tpm1.8.72840038.72840164.72840379.72840505.72828263.72828397.72841276.72841496	3.48797e-11	0.39,0.385,0.352	0.527,0.549,0.556	-0.168
MXE.Myo9b.16.19728833.19728923.19730695.19730809.19727732.19727814.19734283.19734406	4.50278e-10	0.653,0.594,0.587	0.876,0.887,0.893	-0.274
MXE.AABR07073181.1.5.155853492.155853543.155853873.155854048.155851503.155851664.155854271.155854523	3.02754e-08	0.258,0.354,0.343	0.53,0.514,0.582	-0.224
MXE.Myo9b.16.19728833.19728923.19730695.19730809.19727732.19727814.19732535.19732575	5.52158e-07	0.503,0.434,0.447	0.71,0.675,0.675	-0.225
MXE.Rps24.16.760364.760382.761659.761682.759685.759796.762005.762075	7.78109e-07	0.581,0.492,0.649	0.847,0.817,0.902	-0.281
MXE.Myo9b.16.19730695.19730809.19732535.19732575.19727732.19727814.19734283.19734406	9.33101e-07	0.34,0.414,0.398	0.143,0.144,0.12	0.248
MXE.Col5a1.3.6570755.6570824.6570885.6570954.6568350.6568432.6574346.6574580	0.000206914	0.517,0.494,0.538	0.389,0.387,0.397	0.125
MXE.Col5a1.3.6570755.6570824.6570885.6570954.6567402.6567648.6574346.6574580	0.000206914	0.517,0.493,0.538	0.389,0.387,0.397	0.125
MXE.Prnp.3.124519940.124520061.124527962.124528058.124518258.124518356.124529319.124531316	0.000239882	0.445,0.432,0.277	0.176,0.089,0.04	0.283
MXE.Col5a1.3.6570755.6570824.6570885.6570954.6568350.6568463.6574346.6574580	0.0009987	0.472,0.452,0.479	0.36,0.357,0.364	0.107
MXE.Nutf2.19.37839121.37839238.37844830.37845060.37830916.37830949.37845351.37845478	0.00121552	0.243,0.194,0.286	0.716,0.605,0.616	-0.405
MXE.Myo9b.16.19728841.19728923.19730695.19730809.19727732.19727814.19732535.19732575	0.00137014	0.146,0.067,0.143	0.342,0.241,0.261	-0.163
MXE.Sorbs1.1.259382988.259383048.259396272.259396467.259382218.259382277.259399028.259399154	0.00149451	0.92,0.924,0.833	0.827,0.748,0.8	0.101
MXE.Prnp.3.124519940.124520061.124527946.124528058.124518258.124518356.124529319.124531316	0.0018841	0.623,0.755,0.639	0.383,0.211,0.108	0.438
MXE.Prnp.3.124519940.124520061.124527962.124528054.124518258.124518356.124529319.124531316	0.00207308	0.66,0.587,0.411	0.296,0.156,0.066	0.38
MXE.Sdccag3.3.3833388.3833457.3833818.3833968.3832427.3832543.3834051.3834186	0.00284694	0.252,0.255,0.272	0.424,0.565,0.499	-0.236
MXE.Tmem109.1.226932378.226932595.226934189.226934430.226928607.226928852.226935626.226935689	0.003498	0.676,0.686,0.682	0.843,0.927,0.844	-0.19
MXE.Svil.17.55289394.55290249.55292257.55292341.55288179.55288214.55297975.55298582	0.003498	0.477,0.576,0.498	0.303,0.153,0.186	0.303
MXE.Tecr.19.24707187.24707232.24707642.24707690.24706996.24707100.24708246.24708297	0.00397475	0.182,0.117,0.173	0.258,0.302,0.228	-0.105
MXE.Alg14.2.224915567.224915697.224916092.224916217.224886636.224886768.224930476.224931459	0.00397475	0.495,0.561,0.375	0.702,0.912,0.898	-0.36
MXE.Map2k2.7.11460314.11460513.11460513.11460625.11458966.11459230.11461071.11461133	0.0066592	0.615,0.562,0.625	0.92,0.771,0.92	-0.27
MXE.Kmt2e.4.8241018.8241173.8242637.8242710.8239218.8239403.8255222.8255379	0.00713793	0.791,0.877,0.902	0.985,0.974,0.957	-0.115
MXE.Arhgdia.10.109756669.109756707.109756979.109757035.109756089.109756301.109757452.109757550	0.00824207	0.992,0.969,0.943	0.884,0.897,0.813	0.103
MXE.Usp46.14.36725233.36725463.36738766.36738843.36722317.36722531.36748227.36748311	0.0115757	0.615,0.616,0.712	0.415,0.487,0.49	0.184
MXE.Hs6st2.X.138714214.138714301.138922494.138922692.138677579.138678495.138970942.138971461	0.0144601	0.023,0.0,0.0	0.123,0.118,0.087	-0.102
MXE.RGD1311739.3.123695983.123696045.123697909.123698074.123695657.123695774.123702634.123702732	0.0144601	0.95,0.896,0.854	0.751,0.626,0.778	0.182
MXE.Tmem109.1.226929746.226929869.226932378.226932595.226928607.226928852.226935626.226935689	0.0159803	0.713,0.57,0.532	0.371,0.208,0.24	0.332
MXE.Klc1.6.136362489.136362539.136364300.136364538.136358018.136358154.136373028.136373092	0.0188489	0.292,0.405,0.403	0.529,0.497,0.518	-0.148
MXE.Tmem109.1.226932378.226932595.226934189.226934290.226928607.226928852.226935626.226935689	0.0189284	0.588,0.634,0.567	0.782,0.885,0.805	-0.228
MXE.RGD1311739.3.123695983.123696048.123697909.123698074.123695657.123695774.123702634.123702732	0.0197389	0.951,0.913,0.916	0.817,0.682,0.805	0.159
MXE.Anxa11.16.3888634.3888868.3896445.3896535.3883947.3884010.3911988.3912148	0.0204511	0.755,0.692,0.746	0.942,0.927,0.83	-0.169
MXE.Sdccag3.3.3833237.3833352.3833388.3833457.3832427.3832543.3833818.3833968	0.0210314	1.0,1.0,1.0	0.968,0.89,0.777	0.122
MXE.Ercc6.16.8747754.8748481.8760509.8760635.8740033.8740154.8772185.8772321	0.0215393	0.962,0.91,1.0	0.751,0.925,0.769	0.142
MXE.Cd99.20.56194975.56195053.56195241.56195274.56193289.56193340.56195716.56195770	0.0216331	0.378,0.457,0.443	0.583,0.544,0.505	-0.118
MXE.Nutf2.19.37839121.37839238.37840879.37841075.37830916.37830949.37845351.37845478	0.0220453	0.322,0.219,0.319	0.55,0.957,0.621	-0.423
MXE.Fam149b1.15.4377937.4378071.4382790.4382978.4369884.4369988.4388317.4388476	0.0220838	0.946,0.958,0.971	0.791,0.919,0.796	0.123
MXE.RGD1311739.3.123695983.123696045.123697909.123698049.123695657.123695774.123702634.123702732	0.0247875	0.899,0.835,0.794	0.649,0.515,0.649	0.238
MXE.Tnk2.11.71350860.71350988.71351142.71351238.71348716.71349537.71351328.71352677	0.0283313	0.283,0.319,0.271	0.413,0.363,0.422	-0.108
MXE.Slc17a5.8.85893777.85893868.85900289.85900437.85891256.85892762.85903424.85903557	0.0283313	0.722,0.762,0.716	0.499,0.584,0.49	0.209
MXE.Supt4h1.10.75034130.75034366.75036888.75036977.75032940.75033047.75037125.75037181	0.0298766	0.732,0.92,0.432	1.0,0.888,1.0	-0.268
MXE.RGD1311739.3.123695983.123696048.123697909.123698049.123695657.123695774.123702634.123702732	0.0308544	0.9,0.86,0.878	0.732,0.577,0.687	0.214
MXE.Flt3lg.1.101130029.101130083.101130600.101130714.101129299.101129443.101130979.101131046	0.031807	0.718,0.726,0.66	0.887,0.873,0.879	-0.178
MXE.Myef2.3.117362732.117362804.117363080.117363255.117361083.117361292.117363479.117363548	0.031807	0.363,0.3,0.32	0.424,0.509,0.458	-0.136
MXE.Fam149b1.15.4371033.4371158.4377937.4378071.4369884.4369988.4388317.4388476	0.0358612	0.053,0.053,0.046	0.252,0.119,0.142	-0.12
MXE.Fam111a.1.229004159.229004198.229007420.229007546.229003960.229004016.229013458.229013661	0.040411	0.034,0.041,0.09	0.314,0.082,0.28	-0.17
MXE.Axl.1.82563906.82564138.82566746.82566773.82563470.82563562.82566983.82567134	0.0432974	0.266,0.261,0.301	0.136,0.201,0.178	0.104
MXE.Arhgap17.1.193243546.193243595.193245127.193245237.193239039.193239872.193246163.193246715	0.0443077	0.756,0.694,0.709	0.274,0.286,0.638	0.32
MXE.Hnrnpdl.14.11201649.11201812.11202056.11202148.11201298.11201413.11202512.11202669	0.0448168	0.553,0.621,0.575	0.662,0.702,0.698	-0.104
MXE.Nfatc3.19.38100618.38100704.38110168.38110237.38090364.38091369.38111339.38114003	0.0458478	0.0,0.0,0.0	0.085,0.17,0.125	-0.127
MXE.Rab7b.13.48466079.48466195.48474076.48474202.48465363.48465490.48480476.48482138	0.047094	0.024,0.069,0.04	0.152,0.209,0.074	-0.101
A5SS.Tgfb1i1.1.199665007.199665108.199665007.199665088.199665320.199665436	0.00143093	0.946,1.0,1.0	0.712,0.663,0.86	0.237
A5SS.Tacc2.1.201299762.201300054.201299762.201299961.201304456.201304518	0.00236545	0.567,0.461,0.41	0.769,0.651,0.786	-0.256
A5SS.Gmppa.9.82632229.82632532.82632229.82632360.82633139.82633194	0.00379171	0.725,0.796,0.691	1.0,1.0,0.862	-0.217
A5SS.Ptgs1.3.15567533.15567677.15567533.15567610.15570103.15570285	0.00913281	0.912,0.92,0.814	1.0,1.0,1.0	-0.118
A5SS.Ttll1.7.124351436.124351580.124351499.124351580.124347498.124347585	0.011798	0.91,0.925,0.79	1.0,0.976,1.0	-0.117
A5SS.Cuedc2.1.266085754.266086299.266086291.266086299.266080185.266080269	0.018007	1.0,1.0,0.822	0.693,0.628,0.712	0.263
A5SS.Eif5a.10.56531407.56531483.56531416.56531483.56529487.56529673	0.0182655	0.843,0.782,0.851	0.977,0.916,0.978	-0.132
A5SS.Limd1.8.132553217.132553457.132553217.132553258.132573881.132573983	0.0211069	0.864,0.964,0.755	1.0,1.0,1.0	-0.139
A5SS.Pard3.19.60365391.60365543.60365391.60365540.60370735.60370963	0.0211069	0.847,0.71,0.898	1.0,0.961,1.0	-0.169
A5SS.Eif5a.10.56531411.56531483.56531416.56531483.56529487.56529673	0.0247767	0.73,0.636,0.659	0.951,0.825,0.953	-0.235
A5SS.Sirt5.17.23986757.23986889.23986757.23986808.23992420.23992569	0.0300574	0.139,0.169,0.203	0.038,0.062,0.102	0.103
A5SS.Flcn.10.46171995.46172166.46172031.46172166.46168898.46169016	0.0391072	0.216,0.237,0.17	0.463,0.398,0.38	-0.206
A5SS.Coasy.10.88992486.88992723.88992486.88992501.88992810.88993518	0.0434262	0.366,0.26,0.255	0.606,0.48,0.504	-0.236
A5SS.Tbx18.8.95365530.95365668.95365579.95365668.95364019.95364114	0.0460007	0.654,1.0,0.649	1.0,0.954,1.0	-0.217
A3SS.Fn1.9.78911952.78912075.78911952.78912000.78912688.78912778	6.89638e-09	0.731,0.747,0.762	0.848,0.856,0.853	-0.106
A3SS.Pdlim5.2.247892368.247892787.247892368.247892460.247894038.247894081	1.55013e-07	0.906,0.88,0.856	0.758,0.752,0.801	0.11
A3SS.Fn1.9.78911952.78912024.78911952.78912000.78912688.78912778	1.55013e-07	0.318,0.319,0.333	0.462,0.486,0.467	-0.148
A3SS.Arhgap23.10.85405522.85405840.85405771.85405840.85398286.85398430	0.000993015	0.98,0.987,0.967	0.853,0.93,0.799	0.117
A3SS.Atp6v0a1.10.88930820.88930924.88930838.88930924.88924738.88924867	0.00107497	1.0,0.971,1.0	0.887,0.854,0.809	0.14
A3SS.Neil3.16.41127921.41128342.41128149.41128342.41126351.41126505	0.00166175	0.872,0.672,0.602	1.0,1.0,1.0	-0.285
A3SS.Il18bp.1.167092644.167092839.167092644.167092742.167093085.167093162	0.00395572	0.846,0.882,0.807	1.0,1.0,1.0	-0.155
A3SS.Mterf3.7.71280138.71280286.71280138.71280281.71287899.71288131	0.00518089	0.963,0.76,0.856	1.0,1.0,1.0	-0.14
A3SS.Pan3.12.9224705.9224845.9224705.9224784.9229551.9229642	0.00581178	0.761,0.871,0.862	1.0,1.0,1.0	-0.169
A3SS.Fgfr1op.1.53136477.53136708.53136477.53136705.53145849.53145930	0.0165402	0.904,1.0,1.0	0.695,0.836,0.683	0.23
A3SS.Pqlc1.18.76796183.76796366.76796221.76796366.76776390.76776524	0.0192484	0.833,0.957,0.806	0.963,1.0,1.0	-0.122
A3SS.Mapk11.7.130125735.130125958.130125735.130125865.130128402.130128589	0.0198941	0.264,0.31,0.324	0.074,0.046,0.07	0.236
A3SS.Lamtor2.2.187912410.187912651.187912410.187912578.187914301.187914464	0.0244505	0.141,0.0,0.131	0.353,0.381,0.282	-0.248
A3SS.Dcaf11.15.34234900.34235268.34235033.34235268.34234192.34234458	0.026162	0.841,0.811,0.778	0.988,0.906,0.925	-0.13
A3SS.Glis2.10.11158767.11158920.11158767.11158892.11158976.11159153	0.027625	1.0,0.952,1.0	0.926,0.806,0.825	0.132
RI.Srp68.10.105124858.105125073.105124858.105124891.105125026.105125073	0.00234162	0.806,0.906,0.74	1.0,1.0,1.0	-0.183
RI.LOC688452.1.59714223.59714452.59714223.59714301.59714375.59714452	0.00413033	0.713,0.343,0.566	0.878,0.915,0.929	-0.367
RI.Arhgap23.10.85405522.85405840.85405522.85405649.85405771.85405840	0.00923706	0.724,0.802,0.816	0.929,0.916,0.897	-0.133
RI.Lmo7.15.86439230.86439475.86439230.86439287.86439433.86439475	0.0105007	0.935,0.948,0.932	0.7,0.721,0.898	0.165
RI.Prrc2a.20.5150480.5150697.5150480.5150499.5150606.5150697	0.0105007	1.0,1.0,1.0	0.94,0.739,0.83	0.164

## Sheet: P OE - P Ctr
ASEID	FDR	Psi.P.OE	Psi.P.Ctr	Delta Psi
SE.Cxadr.11.16856463.16856595.16852693.16852898.16856943.16857099	0	0.028,0.036,0.017	0.173,0.261,0.322	-0.225
SE.Ppfibp1.4.181394960.181394993.181393584.181393699.181396178.181396240	0	0.91,0.838,0.864	0.484,0.529,0.542	0.352
SE.Ppfibp1.4.181408996.181409026.181408544.181408608.181412020.181412192	0	0.293,0.351,0.484	0.142,0.104,0.101	0.26
SE.Hdac10.7.130104708.130104815.130104570.130104635.130104940.130105030	0	0.493,0.574,0.164	1.0,1.0,0.978	-0.582
SE.Brd4.7.14230130.14230346.14228763.14229354.14230480.14230533	0	0.521,0.482,0.365	1.0,1.0,1.0	-0.544
SE.Brd4.7.14230130.14230322.14228763.14229354.14230480.14230533	0	0.116,0.136,0.164	1.0,1.0,1.0	-0.861
SE.Brd4.7.14229961.14230346.14229124.14229354.14230480.14230531	0	0.638,0.653,0.47	1.0,1.0,1.0	-0.413
SE.Ehmt1.3.2057180.2057737.2051008.2051180.2060097.2060161	0	0.633,0.576,0.298	0.966,0.945,0.953	-0.452
SE.Zbtb24.20.46178513.46178681.46168853.46169833.46179072.46179156	0	0.505,0.26,0.185	0.929,1.0,1.0	-0.66
SE.Zbtb24.20.46179933.46180017.46179077.46179156.46185641.46185723	0	0.604,0.584,0.438	1.0,1.0,1.0	-0.458
SE.Zbtb24.20.46179856.46180017.46179077.46179156.46185641.46185723	0	0.401,0.298,0.207	1.0,1.0,1.0	-0.698
SE.Os9.7.70384566.70384668.70384299.70384397.70384784.70384995	0	0.887,0.84,0.707	1.0,1.0,1.0	-0.189
SE.Os9.7.70384566.70384666.70384299.70384397.70384784.70384995	0	0.772,0.709,0.506	1.0,1.0,1.0	-0.338
SE.Chp1.3.111366219.111366282.111354505.111354707.111371555.111371636	0	0.902,0.814,0.864	0.996,1.0,1.0	-0.139
SE.Cdc37.8.22159739.22159923.22154066.22155449.22161390.22161454	0	0.171,0.182,0.181	1.0,1.0,0.902	-0.789
SE.Slc8b1.12.41573812.41573934.41570743.41570897.41575672.41575814	0	0.824,0.618,0.54	1.0,1.0,1.0	-0.339
SE.Stard3.10.86326791.86327014.86313382.86313480.86330064.86330297	0	0.748,0.851,0.695	1.0,1.0,1.0	-0.235
SE.Stard3.10.86326741.86327014.86313382.86313480.86330064.86330297	0	0.838,0.903,0.813	1.0,1.0,1.0	-0.149
SE.Ciart.2.197988331.197988359.197987704.197987920.197989370.197989482	0	0.454,0.538,0.307	0.95,1.0,1.0	-0.55
SE.Ctcf.19.37642960.37643143.37641880.37642041.37643610.37643746	0	0.927,0.888,0.838	0.996,1.0,1.0	-0.114
SE.Ttyh3.12.16100540.16100612.16099860.16099936.16100913.16100969	0	0.209,0.172,0.305	0.004,0.0,0.0	0.227
SE.Slc4a2.4.7265008.7265180.7264682.7264915.7265334.7265504	0	0.827,0.649,0.622	0.991,1.0,1.0	-0.298
SE.Slc4a2.4.7265006.7265141.7264682.7264915.7265334.7265504	0	0.803,0.613,0.569	0.991,1.0,1.0	-0.335
SE.Slc4a2.4.7265006.7265180.7264682.7264915.7265334.7265504	0	0.893,0.767,0.74	0.995,1.0,1.0	-0.198
SE.Taok2.1.198310708.198310975.198310355.198310517.198311116.198311301	0	0.915,0.833,0.817	0.994,1.0,1.0	-0.143
SE.Taok2.1.198303422.198303529.198303104.198303287.198307521.198307761	0	0.148,0.124,0.042	0.806,0.871,0.761	-0.708
SE.Taok2.1.198310708.198310895.198310355.198310517.198311116.198311301	0	0.874,0.782,0.731	0.993,1.0,1.0	-0.202
SE.Taok2.1.198310708.198310993.198310355.198310517.198311116.198311301	0	0.921,0.838,0.81	0.996,1.0,1.0	-0.142
SE.Cd47.11.53562258.53562372.53545476.53545566.53563211.53563559	0	0.084,0.051,0.043	0.187,0.156,0.162	-0.109
SE.Dclk1.2.144866024.144866106.144862498.144862593.144876415.144876548	0	0.146,0.125,0.092	0.53,0.624,0.613	-0.468
SE.Nup85.10.104133927.104133948.104131202.104131309.104134155.104134221	0	0.436,0.323,0.06	1.0,1.0,1.0	-0.727
SE.Nup85.10.104133927.104134011.104131202.104131309.104134155.104134221	0	0.805,0.766,0.546	1.0,1.0,1.0	-0.294
SE.Nup85.10.104133843.104134011.104131202.104131309.104134155.104134221	0	0.601,0.456,0.395	1.0,1.0,1.0	-0.516
SE.Gps2.10.56526288.56526378.56526055.56526209.56526453.56526533	0	0.68,0.511,0.366	0.972,0.966,1.0	-0.46
SE.Eogt.4.129487715.129487802.129486600.129486669.129487896.129487968	0	0.799,0.883,0.712	0.988,0.982,0.975	-0.184
SE.Brd1.7.129690628.129690742.129690244.129690349.129696841.129697102	0	0.809,0.82,0.933	0.303,0.397,0.275	0.529
SE.Brd1.7.129690628.129690688.129690244.129690349.129696841.129697102	0	0.591,0.601,0.834	0.0,0.044,0.01	0.657
SE.Csnk1d.10.110154582.110154640.110151419.110153536.110157630.110157770	0	0.297,0.198,0.153	0.572,0.479,0.544	-0.316
SE.Csnk1d.10.110154582.110154645.110151419.110153536.110157630.110157770	0	0.566,0.435,0.381	0.818,0.758,0.798	-0.331
SE.Csnk2a2.19.9999411.9999495.9994996.9995044.10000142.10000253	0	0.845,0.798,0.762	0.982,0.953,0.993	-0.174
SE.Fnbp4.3.79608142.79608284.79606730.79607062.79608785.79608943	0	0.11,0.164,0.204	0.017,0.0,0.0	0.154
SE.Necap2.5.159591512.159591597.159589880.159590986.159593417.159593586	0	0.889,0.757,0.735	0.998,0.993,0.995	-0.202
SE.Necap2.5.159591512.159591703.159589880.159590986.159593417.159593586	0	0.716,0.491,0.45	0.992,0.98,0.984	-0.433
SE.Mtss1.7.98826697.98826892.98825336.98825510.98830789.98830997	0	0.435,0.437,0.345	0.859,0.871,0.906	-0.473
SE.Tgfb1i1.1.199665320.199665436.199664172.199664212.199665561.199665614	0	0.647,0.499,0.324	0.931,0.963,0.976	-0.467
SE.Tgfb1i1.1.199665320.199665436.199665107.199665175.199665561.199665614	0	0.737,0.622,0.317	1.0,0.99,1.0	-0.438
SE.Mau2.16.21156616.21156744.21156145.21156236.21156832.21163257	0	0.863,0.74,0.772	1.0,1.0,1.0	-0.208
SE.Rbms1.3.46810523.46810571.46809583.46809634.46812986.46813036	0	0.598,0.718,0.467	1.0,1.0,1.0	-0.406
SE.Plxna1.4.121233728.121233872.121233137.121233372.121233978.121234218	0	0.869,0.749,0.711	1.0,1.0,1.0	-0.224
SE.Dhrs1.15.34428288.34428368.34425655.34425802.34428512.34428656	0	0.507,0.388,0.262	0.863,0.886,0.915	-0.502
SE.Tbc1d7.17.23783399.23783438.23782874.23783012.23786111.23786299	0	0.341,0.304,0.191	0.013,0.088,0.023	0.237
SE.Sgf29.1.198083607.198083780.198067065.198067235.198089444.198089541	0	0.113,0.209,0.222	0.003,0.0,0.011	0.177
SE.Smad4.18.69643451.69643568.69642129.69642180.69643659.69643779	0	0.894,0.828,0.81	0.996,1.0,1.0	-0.155
SE.Smad4.18.69643659.69643779.69642129.69642180.69647501.69647714	0	0.782,0.678,0.659	1.0,1.0,0.994	-0.292
SE.Rhbdd3.14.85356063.85356248.85353537.85353574.85356334.85356619	0	0.547,0.426,0.467	0.877,0.862,0.908	-0.402
SE.Rhbdd3.14.85356161.85356248.85353537.85353574.85356334.85356619	0	0.402,0.311,0.295	0.824,0.802,0.868	-0.495
SE.Rhbdd3.14.85354112.85354302.85353537.85353574.85356334.85356619	0	0.469,0.474,0.344	0.876,0.832,0.904	-0.442
SE.Ociad1.14.37461515.37461668.37458028.37458508.37465098.37465274	0	0.88,0.857,0.842	0.959,0.973,0.951	-0.101
SE.Lrch1.15.56817129.56817210.56808028.56808138.56817524.56817597	0	0.566,0.346,0.529	0.02,0.023,0.046	0.451
SE.Csnk2b.20.5109790.5109962.5108694.5108919.5110116.5110192	0	0.925,0.906,0.81	0.997,1.0,0.996	-0.117
SE.Prpf3.2.197952152.197952204.197950635.197950754.197952407.197952507	0	0.362,0.388,0.179	1.0,1.0,1.0	-0.69
SE.Tbc1d23.11.45448771.45448816.45447250.45447390.45452194.45452283	0	0.421,0.397,0.205	0.927,0.927,0.987	-0.606
SE.Prpf3.2.197952090.197952262.197950635.197950754.197952407.197952507	0	0.567,0.546,0.295	1.0,1.0,1.0	-0.531
SE.Prpf3.2.197952090.197952204.197950635.197950754.197952407.197952507	0	0.725,0.709,0.468	1.0,1.0,1.0	-0.366
SE.Nrn1l.19.37863099.37863319.37862822.37863009.37863704.37863868	0	0.909,0.862,0.761	1.0,1.0,1.0	-0.156
SE.Nfatc3.19.38100615.38100745.38090364.38091369.38111339.38114003	0	0.304,0.224,0.347	0.05,0.087,0.095	0.214
SE.Nfatc3.19.38100641.38100745.38090364.38091369.38111339.38114003	0	0.467,0.44,0.584	0.122,0.182,0.192	0.332
SE.Crebbp.10.11714514.11714796.11714070.11714232.11716134.11721039	0	0.773,0.77,0.601	1.0,1.0,1.0	-0.285
SE.Sec31a.14.10896876.10897212.10894995.10895119.10902035.10902094	0	0.392,0.412,0.577	0.194,0.108,0.143	0.312
SE.Polg.1.141184568.141184764.141183437.141183602.141187225.141188031	0	0.924,0.882,0.827	1.0,1.0,1.0	-0.122
SE.Tns1.9.81217396.81217489.81208146.81208345.81221262.81221338	0	0.906,0.876,0.776	1.0,1.0,0.996	-0.146
SE.Tns1.9.81217396.81217474.81208146.81208345.81221262.81221338	0	0.75,0.701,0.522	1.0,1.0,0.989	-0.339
SE.Tns1.9.81216556.81216580.81208146.81208345.81217396.81217474	0	0.204,0.28,0.322	0.008,0.0,0.005	0.264
SE.Trip12.9.92349138.92349207.92348883.92349049.92350431.92350608	0	0.921,0.902,0.791	1.0,0.996,0.997	-0.126
SE.Sec31a.14.10896876.10897167.10894995.10895119.10902035.10902094	0	0.36,0.362,0.523	0.173,0.091,0.139	0.281
SE.Zdhhc20.15.38113865.38113910.38113402.38113518.38115010.38115100	0	0.112,0.193,0.251	0.007,0.0,0.002	0.182
SE.Pld1.2.113781656.113781770.113780669.113780883.113788384.113788513	0	0.251,0.224,0.167	0.7,0.586,0.728	-0.457
SE.Gab1.19.30892884.30892974.30883265.30883569.30894289.30894383	0	0.146,0.121,0.083	0.408,0.363,0.424	-0.282
SE.Piezo1.19.55313726.55313798.55313287.55313388.55314203.55314285	0	0.244,0.26,0.219	0.736,0.648,0.716	-0.459
SE.Mprip.10.46129845.46129892.46129339.46129425.46132876.46133571	0	0.807,0.857,0.856	0.487,0.568,0.559	0.302
SE.Mprip.10.46129830.46129892.46129339.46129425.46132876.46133571	0	0.945,0.963,0.965	0.832,0.865,0.836	0.113
SE.Tex261.4.115449371.115449490.115448707.115449257.115450213.115450281	0	0.872,0.843,0.771	0.986,0.982,0.986	-0.156
SE.Tex261.4.115449347.115449490.115448707.115449257.115450213.115450281	0	0.244,0.143,0.056	0.684,0.762,0.772	-0.592
SE.Tex261.4.115449347.115449474.115448707.115449257.115450213.115450281	0	0.853,0.815,0.733	0.981,0.978,0.984	-0.181
SE.Shc1.2.188748893.188749061.188745502.188745604.188753320.188753507	0	0.763,0.813,0.636	1.0,1.0,0.989	-0.259
SE.Stx2.12.31357066.31357191.31355906.31356017.31358638.31360254	0	0.963,0.961,0.972	0.707,0.609,0.57	0.337
SE.Dnajc13.8.112728029.112728230.112727220.112727405.112729217.112729353	0	0.046,0.24,0.151	0.0,0.0,0.001	0.145
SE.Smpd4.11.87538671.87538758.87535322.87535394.87541522.87541668	0	0.245,0.164,0.09	0.56,0.526,0.5	-0.362
SE.Nup214.3.11006974.11007150.11002116.11002278.11008557.11008655	0	0.454,0.332,0.319	0.985,1.0,0.983	-0.621
SE.Inf2.6.137177127.137177212.137176419.137177043.137177563.137177622	0	0.948,0.944,0.972	0.237,0.534,0.237	0.619
SE.Inf2.6.137177127.137177178.137176419.137177043.137177566.137177622	0	0.368,0.432,0.397	0.022,0.032,0.017	0.375
SE.Myo9b.16.19728262.19728404.19727732.19727814.19728833.19728923	0	0.164,0.176,0.465	0.0,0.0,0.0	0.268
SE.Myo9b.16.19728262.19728397.19727735.19727814.19728833.19728923	0	0.182,0.137,0.493	0.0,0.0,0.0	0.271
SE.Myo9b.16.19728192.19728404.19727735.19727814.19728833.19728923	0	0.09,0.133,0.154	0.004,0.004,0.002	0.122
SE.Yars.5.147402213.147402277.147400979.147401121.147402762.147403571	0	0.088,0.118,0.144	0.001,0.01,0.001	0.113
SE.Chaf1a.9.11023133.11023217.11021320.11022132.11023939.11023990	0	0.081,0.104,0.27	0.007,0.0,0.002	0.149
SE.Myl6.7.2907014.2907059.2906136.2906318.2907350.2907378	0	0.148,0.174,0.132	0.572,0.606,0.617	-0.447
SE.Myl6.7.2906814.2907059.2906136.2906318.2907350.2907378	0	0.02,0.026,0.018	0.128,0.157,0.158	-0.126
SE.Myl6.7.2906840.2907059.2906136.2906318.2907350.2907420	0	0.022,0.028,0.019	0.135,0.166,0.167	-0.133
SE.Tmem57.5.153166057.153166152.153165436.153165563.153166975.153167117	0	0.285,0.209,0.281	0.014,0.0,0.011	0.25
SE.Zfp143.1.174734069.174734231.174731170.174731319.174735612.174735759	0	0.773,0.559,0.472	0.981,1.0,1.0	-0.392
SE.Spsb3.10.14252706.14252832.14252513.14252631.14253015.14253563	0	0.738,0.673,0.537	1.0,1.0,1.0	-0.351
SE.Spsb3.10.14252242.14252451.14252036.14252158.14252528.14252631	0	0.818,0.847,0.759	1.0,1.0,1.0	-0.192
SE.Traf4.10.65420325.65420487.65420083.65420239.65420810.65420915	0	0.875,0.797,0.686	1.0,1.0,1.0	-0.214
SE.Ncor1.10.48642688.48642817.48641826.48641990.48645554.48646048	0	0.812,0.718,0.577	1.0,1.0,0.989	-0.294
SE.Ncor1.10.48642688.48642804.48641826.48641990.48645554.48646048	0	0.605,0.49,0.38	1.0,1.0,0.973	-0.499
SE.Cdt1.19.55385032.55385185.55384606.55384795.55385269.55385471	0	0.892,0.914,0.76	1.0,1.0,1.0	-0.145
SE.Slc39a7.20.3822030.3822427.3821778.3821947.3822724.3822754	0	0.892,0.853,0.744	0.981,0.991,0.991	-0.158
SE.Slc39a7.20.3821306.3821418.3821060.3821198.3821597.3821651	0	0.554,0.514,0.321	1.0,0.994,1.0	-0.535
SE.Slc39a7.20.3821306.3821484.3821060.3821198.3821597.3821651	0	0.587,0.569,0.354	1.0,0.995,1.0	-0.495
SE.Slc39a7.20.3821306.3821489.3821060.3821198.3821597.3821651	0	0.699,0.711,0.508	1.0,0.997,1.0	-0.36
SE.Slc39a7.20.3821597.3821651.3821060.3821198.3821778.3821947	0	0.792,0.746,0.648	1.0,1.0,1.0	-0.271
SE.Washc3.7.28778184.28778292.28776019.28776085.28781809.28781920	0	0.92,0.906,0.791	1.0,1.0,1.0	-0.128
SE.Washc3.7.28778200.28778292.28776019.28776085.28781809.28781920	0	0.81,0.773,0.593	1.0,1.0,1.0	-0.275
SE.Washc3.7.28778200.28778292.28776019.28776085.28781812.28781920	0	0.582,0.416,0.272	1.0,1.0,1.0	-0.577
SE.Scaf1.1.101003750.101003845.101000769.101003442.101006776.101006844	0	0.104,0.159,0.273	0.0,0.0,0.0	0.179
SE.Scaf1.1.101003746.101003845.101000769.101003442.101006776.101006844	0	0.106,0.142,0.267	0.0,0.0,0.0	0.172
SE.Lrrfip2.8.119472517.119472619.119464965.119465058.119472843.119472976	0	0.12,0.083,0.154	0.008,0.026,0.005	0.106
SE.Ikbkb.16.74215738.74215908.74215039.74215169.74216033.74216228	0	0.089,0.067,0.177	0.003,0.0,0.0	0.11
SE.Lama5.3.175553556.175553705.175553044.175553424.175553770.175553861	0	0.698,0.694,0.537	0.999,0.982,0.999	-0.35
SE.Lama5.3.175553556.175553676.175553044.175553424.175553770.175553861	0	0.828,0.819,0.705	0.999,0.992,0.999	-0.213
SE.Lama5.3.175553505.175553676.175553044.175553424.175553770.175553833	0	0.639,0.608,0.467	0.998,0.977,0.998	-0.42
SE.Ciz1.3.11394658.11394730.11393131.11393247.11396163.11396393	0	0.72,0.516,0.57	0.994,0.992,0.944	-0.375
SE.Ciz1.3.11394658.11394759.11393131.11393247.11396163.11396393	0	0.416,0.246,0.276	0.977,0.967,0.812	-0.606
SE.Ciz1.3.11405062.11405202.11404582.11404670.11405345.11405501	0	0.783,0.789,0.712	1.0,1.0,0.993	-0.236
SE.Rhbdf1.10.15684103.15684204.15683959.15684035.15684311.15684465	0	0.92,0.836,0.808	0.997,1.0,0.995	-0.143
SE.Rhbdf1.10.15684103.15684154.15683923.15684035.15684311.15684465	0	0.809,0.657,0.573	0.988,1.0,0.985	-0.311
SE.Alg3.11.83991119.83991282.83990000.83990206.83991457.83991706	0	0.442,0.405,0.312	0.991,0.977,1.0	-0.603
SE.Rn50_15_0408.6.15.36930744.36930996.36928791.36928888.36934314.36934440	0	0.778,0.695,0.654	0.982,1.0,0.983	-0.279
SE.Rn50_15_0408.6.15.36930789.36930996.36928791.36928888.36934314.36934440	0	0.724,0.618,0.589	0.975,1.0,0.976	-0.34
SE.Mrps26.3.123093612.123093759.123093263.123093522.123093839.123093963	0	0.806,0.906,0.845	0.997,0.989,1.0	-0.143
SE.Nasp.5.135455434.135456415.135450733.135450813.135457031.135457141	0	0.511,0.483,0.513	0.253,0.292,0.209	0.251
SE.Smarce1.10.87132639.87132744.87128293.87128374.87135799.87135843	0	0.885,0.851,0.726	0.993,0.996,0.993	-0.173
SE.Syne2.6.99148030.99148080.99147436.99147637.99148507.99148636	0	0.317,0.372,0.396	0.006,0.0,0.003	0.359
SE.Klc1.6.136364300.136364431.136357992.136358154.136373028.136373092	0	0.287,0.277,0.245	0.48,0.623,0.606	-0.3
SE.Klc1.6.136364300.136364431.136357992.136358127.136373028.136373092	0	0.541,0.613,0.472	0.795,0.862,0.841	-0.291
SE.Klc1.6.136364300.136364538.136357992.136358154.136373028.136373092	0	0.114,0.105,0.086	0.218,0.328,0.314	-0.185
SE.Pold1.1.100544777.100544841.100544297.100544489.100545042.100545109	0	0.646,0.586,0.493	1.0,1.0,1.0	-0.425
SE.Pold1.1.100544730.100544841.100544297.100544489.100545042.100545183	0	0.868,0.799,0.735	1.0,1.0,1.0	-0.199
SE.Klhdc3.9.16615072.16615249.16612432.16612513.16615782.16615854	0	0.351,0.439,0.188	1.0,1.0,1.0	-0.674
SE.Klhdc3.9.16615379.16615495.16612432.16612513.16615782.16615854	0	0.683,0.675,0.398	1.0,1.0,1.0	-0.415
SE.Men1.1.221708755.221708920.221708260.221708396.221709105.221710331	0	0.835,0.92,0.778	1.0,1.0,1.0	-0.156
SE.Rassf8.4.180125825.180125931.180123904.180124083.180130005.180130895	0	0.097,0.132,0.174	0.0,0.0,0.0	0.134
SE.Rassf8.4.180125690.180125931.180123904.180124083.180130005.180130895	0	0.146,0.226,0.329	0.002,0.0,0.009	0.23
SE.Ythdc1.14.22974893.22975028.22971835.22972811.22976434.22976629	0	0.85,0.842,0.755	1.0,1.0,1.0	-0.184
SE.Ythdc1.14.22974841.22975028.22971835.22972811.22976434.22976629	0	0.729,0.722,0.614	1.0,1.0,1.0	-0.312
SE.Ythdc1.14.22974845.22975028.22971835.22972811.22976434.22976629	0	0.733,0.721,0.616	1.0,1.0,1.0	-0.31
SE.Zyx.4.71747202.71747381.71746688.71746809.71748087.71748208	0	0.729,0.666,0.451	1.0,0.992,1.0	-0.382
SE.Clec2d.4.162396373.162396599.162392868.162393031.162397217.162397343	0	0.058,0.104,0.209	0.003,0.004,0.006	0.119
SE.Klhdc3.9.16613995.16614147.16612432.16612513.16615782.16615854	0	0.492,0.648,0.369	1.0,1.0,1.0	-0.497
SE.Tcf25.19.56210183.56210297.56209746.56209819.56212626.56213310	0	0.492,0.605,0.43	0.948,0.969,0.955	-0.448
SE.Tcf25.19.56210165.56210297.56209746.56209819.56212626.56213310	0	0.041,0.142,0.069	0.521,0.606,0.514	-0.463
SE.Ppfia1.1.217680291.217680366.217679862.217679946.217681497.217681632	0	0.595,0.397,0.461	0.067,0.144,0.138	0.368
SE.Zfp106.3.112293272.112293407.112291836.112291953.112295050.112295196	0	0.88,0.787,0.726	0.991,1.0,1.0	-0.199
SE.Zfp106.3.112293272.112293329.112291836.112291953.112295050.112295196	0	0.715,0.559,0.5	0.979,1.0,1.0	-0.402
SE.Zfp106.3.112293272.112293405.112291836.112291953.112295050.112295196	0	0.792,0.669,0.586	0.984,1.0,1.0	-0.312
SE.Vangl1.2.204581525.204581601.204575465.204579321.204581806.204582041	0	0.058,0.234,0.186	0.004,0.006,0.003	0.155
SE.Vangl1.2.204581525.204581661.204575465.204579321.204581806.204582041	0	0.084,0.286,0.33	0.003,0.005,0.002	0.23
SE.Vangl1.2.204581525.204581630.204575465.204579321.204581806.204582041	0	0.071,0.26,0.236	0.004,0.005,0.002	0.185
SE.Pdlim5.2.247892368.247892787.247883552.247883725.247894038.247894081	0	0.88,0.876,0.813	1.0,1.0,0.999	-0.143
SE.Scrib.7.117120463.117120526.117119840.117119930.117121494.117121866	0	0.977,0.955,0.978	0.688,0.801,0.672	0.25
SE.Scrib.7.117108701.117108764.117107870.117107969.117110124.117110199	0	0.314,0.363,0.288	0.615,0.583,0.627	-0.287
SE.Ptcd3.4.99807257.99807308.99804308.99804398.99807991.99808136	0	0.795,0.804,0.69	1.0,0.979,0.986	-0.225
SE.Wdr75.9.52717093.52717185.52716655.52716802.52717483.52717688	0	0.839,0.849,0.662	1.0,1.0,1.0	-0.217
SE.Pcnx3.1.221037935.221038111.221037406.221037497.221038194.221038318	0	0.786,0.512,0.645	0.987,1.0,1.0	-0.348
SE.Tspan6.X.104725793.104725835.104725248.104725323.104726710.104726816	0	0.792,0.819,0.688	1.0,1.0,1.0	-0.234
SE.Pdcd4.1.274628451.274628500.274625223.274625347.274628954.274629061	0	0.307,0.246,0.425	0.018,0.014,0.009	0.312
SE.Pdcd4.1.274628449.274628500.274625223.274625347.274628954.274629061	0	0.422,0.343,0.604	0.017,0.014,0.018	0.44
SE.Zfyve26.6.102439312.102439489.102437085.102437332.102439852.102439975	0	0.608,0.514,0.321	1.0,1.0,1.0	-0.519
SE.Ints9.15.48363984.48364124.48361388.48361451.48366495.48366582	0	0.767,0.539,0.64	1.0,1.0,0.965	-0.34
SE.E4f1.10.13816260.13816459.13816039.13816182.13816630.13816848	0	0.578,0.793,0.4	1.0,1.0,1.0	-0.41
SE.Gatad2a.16.21264216.21264347.21263782.21263857.21265560.21268504	0	0.76,0.814,0.574	0.996,0.994,1.0	-0.281
SE.Gatad2a.16.21264154.21264347.21263782.21263857.21265560.21268504	0	0.867,0.902,0.746	0.998,0.997,1.0	-0.16
SE.Gatad2a.16.21264154.21264259.21263782.21263857.21265560.21268504	0	0.759,0.827,0.64	0.994,0.992,1.0	-0.253
SE.Gsk3b.11.65073689.65073770.65066234.65066389.65076089.65076188	0	0.137,0.279,0.289	0.026,0.055,0.009	0.205
SE.Gsk3b.11.65076089.65076188.65066234.65066389.65083705.65083892	0	0.73,0.671,0.541	1.0,1.0,1.0	-0.353
SE.Tmem50b.11.31747068.31747202.31733105.31733245.31752126.31752243	0	0.319,0.236,0.311	0.071,0.072,0.069	0.218
SE.Tmem50b.11.31747068.31747205.31733105.31733245.31752126.31752243	0	0.249,0.221,0.25	0.051,0.062,0.051	0.185
SE.Ubr7.6.126645945.126646002.126645224.126645330.126647018.126647227	0	0.367,0.286,0.302	0.073,0.062,0.065	0.252
SE.Vps29.12.39697183.39697195.39693708.39693900.39699027.39699088	0	0.118,0.137,0.095	0.346,0.383,0.416	-0.265
SE.Akap17a.12.18530563.18530726.18529371.18529520.18531081.18531161	0	0.561,0.422,0.37	0.881,0.947,0.854	-0.443
SE.Akap17a.12.18529849.18530726.18529344.18529520.18531081.18531161	0	0.678,0.626,0.473	0.932,0.965,0.928	-0.349
SE.Pphln1.7.134656907.134656964.134643600.134643812.134659945.134660025	0	0.459,0.618,0.44	0.877,0.867,0.899	-0.375
SE.Pphln1.7.134656907.134656976.134643600.134643812.134659945.134660025	0	0.172,0.269,0.218	0.671,0.667,0.721	-0.467
SE.Pphln1.7.134656834.134656964.134643600.134643812.134659945.134660194	0	0.155,0.286,0.088	0.649,0.601,0.645	-0.455
SE.Smtn.14.83758453.83758618.83755141.83755445.83758962.83759114	0	0.399,0.433,0.428	0.97,0.983,0.987	-0.56
SE.Smtn.14.83758453.83758596.83755141.83755445.83758962.83759114	0	0.257,0.272,0.285	0.95,0.968,0.974	-0.693
SE.Smtn.14.83756781.83756984.83755141.83755445.83758962.83759114	0	0.01,0.022,0.029	0.317,0.448,0.563	-0.422
SE.Plod3.12.22721734.22721828.22721540.22721609.22721952.22722147	0	0.811,0.762,0.684	1.0,1.0,1.0	-0.248
SE.Plod3.12.22721734.22721848.22721540.22721609.22721952.22722094	0	0.927,0.9,0.851	1.0,1.0,1.0	-0.107
SE.Itga3.10.82866622.82866756.82866319.82866442.82866966.82867116	0	0.769,0.788,0.683	0.962,0.979,0.989	-0.23
SE.Itga3.10.82866622.82866805.82866319.82866442.82866966.82867116	0	0.86,0.883,0.81	0.979,0.989,0.994	-0.136
SE.Ncoa7.1.29322016.29322124.29319343.29319423.29324462.29324576	0	0.742,0.676,0.53	1.0,1.0,1.0	-0.351
SE.Trip6.12.22452011.22452229.22451595.22451853.22452323.22452449	0	0.892,0.868,0.739	1.0,1.0,0.995	-0.165
SE.St5.1.174172999.174174250.174165889.174166026.174187623.174187728	0	0.851,0.703,0.684	0.983,0.978,1.0	-0.241
SE.St5.1.174174163.174174250.174165889.174166026.174187623.174187728	0	0.614,0.425,0.328	0.933,0.905,1.0	-0.49
SE.Ptprf.5.137046364.137046397.137045483.137045581.137048659.137048775	0	0.798,0.748,0.797	0.065,0.188,0.135	0.652
SE.Fhl1.X.159168427.159168509.159167201.159167348.159169067.159169237	0	0.84,0.87,0.826	0.99,0.977,0.981	-0.137
SE.Tp53.10.56196290.56196372.56196075.56196212.56197206.56197313	0	0.878,0.887,0.645	1.0,1.0,0.996	-0.195
SE.Fhl1.X.159168334.159168477.159167166.159167348.159169067.159169237	0	0.86,0.906,0.864	0.993,0.985,0.987	-0.112
SE.Cenpk.2.34317095.34317152.34315162.34315301.34319654.34319727	0	0.943,0.843,0.778	1.0,1.0,0.993	-0.143
SE.Cenpk.2.34317101.34317152.34315162.34315301.34319654.34319727	0	0.74,0.536,0.399	1.0,1.0,0.964	-0.43
SE.Tacc3.14.82347243.82347353.82343649.82343731.82347516.82347679	0	0.701,0.725,0.542	1.0,0.948,0.989	-0.323
SE.Tacc3.14.82347243.82347374.82343649.82343731.82347516.82347679	0	0.711,0.735,0.557	1.0,0.951,0.99	-0.313
SE.Tacc3.14.82347243.82347386.82343649.82343731.82347516.82347679	0	0.856,0.878,0.788	1.0,0.98,0.995	-0.151
SE.Ss18.18.6030769.6030862.6029646.6029769.6033908.6034013	0	0.403,0.466,0.531	0.199,0.084,0.111	0.335
SE.Srpk2.4.8178010.8178103.8177341.8177411.8178461.8178554	0	0.74,0.636,0.545	1.0,1.0,1.0	-0.36
SE.Sun1.12.17506361.17506472.17503893.17503995.17506761.17506827	0	0.586,0.576,0.384	0.912,0.891,0.927	-0.395
SE.Pxk.15.18558670.18558730.18548211.18549402.18562585.18562655	0	0.62,0.468,0.433	0.982,0.974,0.939	-0.458
SE.Pxk.15.18558670.18558733.18548211.18549402.18562585.18562655	0	0.729,0.508,0.503	0.988,0.98,0.944	-0.391
SE.Blvrb.1.84268863.84268934.84268556.84268721.84270406.84270535	0	0.601,0.574,0.398	0.964,0.96,0.99	-0.447
SE.Blvrb.1.84268863.84268953.84268556.84268721.84270406.84270506	0	0.822,0.791,0.705	0.987,0.985,0.996	-0.217
SE.St6galnac4.3.11614486.11614899.11610376.11610434.11616201.11616309	0	0.904,0.897,0.872	1.0,1.0,0.999	-0.109
SE.St6galnac4.3.11614711.11614899.11607730.11607831.11617592.11619593	0	0.733,0.715,0.718	1.0,1.0,1.0	-0.278
SE.St6galnac4.3.11614711.11614899.11610248.11610434.11616201.11616289	0	0.845,0.845,0.794	1.0,1.0,0.998	-0.171
SE.St6galnac4.3.11614486.11614574.11610376.11610434.11616201.11616309	0	0.767,0.758,0.733	1.0,1.0,0.996	-0.246
SE.RGD1307929.10.65536470.65536533.65536330.65536380.65537999.65538294	0	0.723,0.446,0.445	1.0,1.0,1.0	-0.462
SE.Ppp2r5c.6.134933282.134933399.134929174.134929247.134939226.134939358	0	0.831,0.893,0.938	0.557,0.478,0.467	0.387
SE.RGD1307929.10.65536514.65536533.65536330.65536380.65537999.65538294	0	0.501,0.232,0.164	1.0,1.0,1.0	-0.701
SE.Pisd.14.83345474.83345599.83345142.83345281.83345847.83346008	0	0.703,0.577,0.4	1.0,1.0,0.993	-0.438
SE.Pisd.14.83345452.83345599.83345142.83345281.83345847.83346008	0	0.825,0.741,0.6	1.0,1.0,0.997	-0.277
SE.Ddx6.8.48928413.48928645.48928180.48928285.48933024.48933088	0	0.64,0.56,0.374	1.0,1.0,0.991	-0.472
SE.Snx11.10.84632301.84632397.84631868.84632081.84634391.84634492	0	0.83,0.713,0.617	1.0,0.98,0.992	-0.271
SE.Plekhg5.5.169280248.169280331.169279537.169279633.169280490.169280640	0	0.743,0.597,0.433	1.0,1.0,1.0	-0.409
SE.Gak.14.2146043.2146190.2144896.2145090.2147283.2147763	0	0.807,0.707,0.667	0.975,0.956,0.943	-0.231
SE.Gak.14.2146052.2146190.2144896.2145090.2147283.2147763	0	0.62,0.516,0.427	0.942,0.907,0.894	-0.393
SE.Ano1.1.217783901.217783970.217782913.217782988.217786713.217786785	0	0.149,0.141,0.245	0.0,0.009,0.007	0.173
SE.Ano1.1.217783922.217783970.217782913.217782988.217786713.217786785	0	0.154,0.087,0.199	0.0,0.01,0.008	0.141
SE.Ano1.1.217783892.217783970.217782913.217782988.217786713.217786785	0	0.339,0.265,0.356	0.003,0.016,0.014	0.309
SE.Ano1.1.217783892.217783967.217782913.217782988.217786713.217786785	0	0.169,0.121,0.145	0.0,0.0,0.007	0.143
SE.Rell1.14.46024960.46025197.46022101.46022159.46027195.46027334	0	0.863,0.9,0.734	1.0,1.0,1.0	-0.168
SE.Nusap1.3.111437868.111437958.111434102.111434250.111439384.111439494	0	0.898,0.836,0.722	0.991,1.0,0.989	-0.175
SE.Med13l.12.43437257.43437393.43436434.43436654.43438272.43438465	0	0.705,0.508,0.316	1.0,1.0,1.0	-0.49
SE.Med13l.12.43437257.43437660.43436434.43436654.43438272.43438465	0	0.851,0.709,0.498	1.0,1.0,1.0	-0.314
SE.Llgl1.10.46954145.46954306.46953841.46953963.46954396.46954674	0	0.828,0.709,0.519	1.0,1.0,1.0	-0.315
SE.Llgl1.10.46948078.46948139.46947869.46947924.46948307.46948531	0	0.714,0.582,0.41	1.0,0.968,0.99	-0.417
SE.Llgl1.10.46947559.46947695.46947314.46947477.46947869.46947924	0	0.938,0.81,0.696	1.0,1.0,0.997	-0.184
SE.Llgl1.10.46954185.46954306.46953841.46953963.46954396.46954674	0	0.919,0.853,0.748	1.0,1.0,1.0	-0.16
SE.Rab13.2.189585235.189585330.189585091.189585181.189585410.189585464	0	0.781,0.718,0.626	0.991,0.974,0.966	-0.269
SE.Rab13.2.189585264.189585330.189585091.189585181.189585410.189585464	0	0.886,0.859,0.79	0.997,0.99,0.987	-0.146
SE.Tnc.5.79828659.79828932.79821803.79822076.79836080.79836224	0	0.695,0.716,0.796	1.0,0.989,0.982	-0.255
SE.Tnc.5.79824317.79824590.79821803.79822076.79836080.79836344	0	0.613,0.648,0.666	1.0,0.991,0.992	-0.352
SE.Tnc.5.79824317.79824590.79821803.79822076.79828659.79828932	0	0.564,0.548,0.474	0.916,0.899,0.917	-0.382
SE.Tnc.5.79829443.79829716.79821803.79822076.79836080.79836344	0	0.8,0.812,0.864	1.0,0.992,0.992	-0.169
SE.Tmem189.3.164378106.164378319.164376642.164377560.164379534.164379636	0	0.871,0.808,0.737	1.0,1.0,0.999	-0.194
SE.Tmem189.3.164378106.164378317.164376642.164377560.164379534.164379679	0	0.805,0.709,0.637	1.0,1.0,0.998	-0.282
SE.Man2c1.8.61812963.61813087.61812511.61812657.61813399.61813521	0	0.924,0.677,0.691	1.0,0.979,1.0	-0.229
SE.Hacd1.17.81182345.81182467.81177594.81177773.81187237.81187326	0	0.218,0.191,0.166	0.755,0.578,0.706	-0.488
SE.Ncaph2.7.130340775.130340829.130340560.130340668.130340947.130341018	0	0.841,0.758,0.678	1.0,1.0,1.0	-0.241
SE.Cers2.2.196494671.196494825.196494478.196494585.196494989.196495904	0	0.888,0.791,0.679	1.0,1.0,1.0	-0.214
SE.Bcl9l.8.48831726.48831869.48829414.48829499.48832154.48832308	0	0.885,0.817,0.744	1.0,1.0,1.0	-0.185
SE.Bcl9l.8.48831656.48831869.48829414.48829499.48832154.48832436	0	0.895,0.836,0.76	1.0,1.0,1.0	-0.17
SE.Bcl9l.8.48831723.48831869.48829414.48829499.48832154.48832308	0	0.883,0.813,0.734	1.0,1.0,1.0	-0.19
SE.Smad2.18.72592999.72593089.72571407.72571612.72594060.72594254	0	0.78,0.837,0.731	0.97,0.942,0.954	-0.173
SE.Poldip3.7.123999322.123999563.123998238.123998368.123999910.124000090	0	0.556,0.56,0.452	0.986,1.0,0.981	-0.466
SE.Poldip3.7.123999322.123999400.123998238.123998368.123999910.124000090	0	0.899,0.893,0.833	0.998,1.0,0.997	-0.123
SE.Alad.5.78373692.78373880.78373181.78373232.78379116.78379346	0	0.915,0.925,0.814	1.0,1.0,1.0	-0.115
SE.Mgat4b.10.35733247.35733361.35732939.35732986.35733556.35733632	0	0.92,0.741,0.648	1.0,1.0,1.0	-0.23
SE.Mgat4b.10.35734502.35734610.35734177.35734308.35734699.35734893	0	0.825,0.749,0.492	1.0,0.986,1.0	-0.307
SE.RGD1307830.13.67600849.67600990.67600086.67600182.67601622.67601659	0	0.474,0.364,0.282	1.0,1.0,1.0	-0.627
SE.Washc1.9.113934513.113934693.113934229.113934431.113935450.113935609	0	0.721,0.593,0.435	1.0,1.0,0.989	-0.413
SE.Papd4.2.22775245.22775374.22761403.22761447.22775699.22775776	0	0.876,0.807,0.729	1.0,0.994,0.993	-0.192
SE.Papd4.2.22792051.22792220.22791745.22791835.22797914.22798214	0	0.728,0.292,0.11	1.0,1.0,1.0	-0.623
SE.Gatad2b.2.189724995.189725166.189723523.189723655.189725891.189726207	0	0.852,0.687,0.618	0.978,1.0,1.0	-0.274
SE.Gatad2b.2.189724995.189725118.189723523.189723655.189725891.189726207	0	0.789,0.589,0.506	0.967,1.0,1.0	-0.361
SE.Gpx8.2.44906170.44906319.44903336.44903899.44906793.44907030	0	0.394,0.286,0.285	0.759,0.745,0.737	-0.425
SE.Gpx8.2.44906067.44906303.44903336.44903899.44906793.44907030	0	0.828,0.778,0.72	0.953,0.967,0.963	-0.186
SE.Gpx8.2.44906170.44906329.44903336.44903899.44906793.44907030	0	0.896,0.845,0.814	0.973,0.981,0.975	-0.125
SE.Gpx8.2.44906067.44906286.44903336.44903899.44906793.44907030	0	0.832,0.784,0.726	0.954,0.968,0.964	-0.181
SE.Dhx30.8.118173047.118173158.118169625.118169927.118173983.118174062	0	0.779,0.608,0.58	0.976,1.0,0.995	-0.335
SE.Ubap2l.2.189336575.189336626.189334340.189335017.189337045.189337243	0	0.674,0.795,0.912	0.165,0.237,0.198	0.594
SE.Ep400.12.52048181.52048403.52046544.52046732.52050322.52050518	0	0.863,0.751,0.555	1.0,1.0,1.0	-0.277
SE.Tecr.19.24706453.24706675.24706321.24706365.24706804.24706920	0	0.794,0.803,0.812	1.0,0.983,1.0	-0.191
SE.Tecr.19.24706453.24706526.24706321.24706365.24706804.24706920	0	0.864,0.872,0.878	1.0,0.99,1.0	-0.125
SE.Ubr3.3.56192227.56192289.56188931.56189018.56192382.56192472	0	0.418,0.421,0.195	1.0,1.0,1.0	-0.655
SE.Ubr3.3.56192223.56192289.56188931.56189018.56192382.56192472	0	0.694,0.691,0.355	1.0,1.0,1.0	-0.42
SE.Rad17.2.30643201.30643281.30640267.30640417.30643452.30643538	0	0.622,0.588,0.512	1.0,1.0,1.0	-0.426
SE.Rad17.2.30643201.30643348.30640267.30640417.30643452.30643538	0	0.825,0.792,0.719	1.0,1.0,1.0	-0.221
SE.Rad17.2.30643245.30643348.30640267.30640417.30643452.30643538	0	0.637,0.608,0.512	1.0,1.0,1.0	-0.414
SE.RGD1309995.7.26355428.26355494.26354766.26354812.26355581.26355635	0	0.862,0.712,0.636	1.0,1.0,1.0	-0.263
SE.Ptpra.3.123068376.123068543.123067517.123067637.123069205.123069341	0	0.902,0.841,0.884	1.0,1.0,0.996	-0.123
SE.Ptpra.3.123068376.123068493.123067517.123067637.123069205.123069341	0	0.823,0.758,0.799	1.0,1.0,0.992	-0.204
SE.Araf.X.1386090.1386232.1381949.1382126.1387532.1387631	0	0.643,0.524,0.446	1.0,1.0,1.0	-0.462
SE.Ncam1.8.53883715.53883745.53879258.53879409.53889639.53889782	0	0.287,0.221,0.345	0.003,0.025,0.018	0.269
SE.Trak2.9.65704107.65704213.65701412.65702290.65706041.65706308	0	0.822,0.635,0.422	1.0,0.992,0.991	-0.368
SE.Tbc1d20.3.147787116.147787340.147785466.147785568.147788317.147788510	0	0.298,0.286,0.125	0.808,0.974,0.778	-0.617
SE.Tbc1d20.3.147787198.147787340.147785466.147785568.147788317.147788505	0	0.484,0.481,0.244	0.903,0.989,0.9	-0.528
SE.Tbc1d20.3.147787198.147787277.147785466.147785568.147788317.147788505	0	0.258,0.268,0.135	0.774,0.972,0.787	-0.624
SE.Scly.9.98454514.98454754.98453334.98453371.98454941.98455025	0	0.474,0.379,0.535	0.026,0.025,0.038	0.433
SE.Scly.9.98454652.98454754.98453334.98453371.98454941.98455025	0	0.386,0.366,0.497	0.0,0.0,0.008	0.414
SE.Rnf44.17.10468561.10468738.10467843.10468011.10469413.10469501	0	0.375,0.148,0.102	1.0,1.0,1.0	-0.792
SE.Rnf44.17.10469070.10469192.10467843.10468011.10469413.10469501	0	0.744,0.624,0.435	1.0,1.0,1.0	-0.399
SE.Rnf44.17.10468564.10468738.10467852.10468011.10469413.10469501	0	0.255,0.149,0.071	1.0,1.0,1.0	-0.842
SE.Unc5b.20.30345190.30345355.30343839.30344021.30345962.30346112	0	0.96,0.886,0.751	1.0,1.0,1.0	-0.134
SE.Nav1.13.52292887.52293058.52291741.52291794.52294626.52294775	0	0.855,0.891,0.864	0.993,1.0,0.998	-0.127
SE.Agap3.4.7222358.7223251.7222084.7222177.7225682.7225857	0	0.301,0.283,0.371	0.102,0.163,0.119	0.19
SE.Macf1.5.141053235.141053253.141050182.141050300.141054741.141054816	0	0.229,0.309,0.172	0.552,0.527,0.529	-0.299
SE.Phldb2.11.57457745.57457820.57454353.57454443.57462008.57462108	0	0.061,0.162,0.106	1.0,0.935,0.911	-0.839
SE.Phldb2.11.57460540.57460681.57454353.57454443.57462008.57462108	0	0.657,0.444,0.277	1.0,0.972,0.978	-0.524
SE.Dut.3.117524778.117524811.117524572.117524647.117525086.117525446	0	0.313,0.27,0.221	0.724,0.589,0.653	-0.387
SE.Dut.3.117524778.117524945.117524427.117524647.117525086.117525446	0	0.263,0.244,0.168	0.67,0.525,0.612	-0.377
SE.Dut.3.117524778.117524865.117524572.117524647.117525086.117525446	0	0.344,0.304,0.225	0.739,0.616,0.682	-0.388
SE.Dut.3.117524778.117524849.117524572.117524647.117525086.117525446	0	0.78,0.756,0.648	0.951,0.921,0.93	-0.206
SE.Dut.3.117524778.117524843.117524572.117524647.117525086.117525446	0	0.324,0.293,0.208	0.728,0.591,0.667	-0.387
SE.Phf2.17.16271642.16271739.16270623.16270733.16272693.16274624	0	0.702,0.764,0.545	1.0,1.0,1.0	-0.33
SE.RGD1305350.5.164756350.164756476.164754972.164755826.164756975.164757680	0	0.126,0.06,0.244	0.012,0.007,0.01	0.134
SE.RGD1305350.5.164756333.164756476.164754972.164755826.164756975.164757680	0	0.121,0.06,0.234	0.011,0.009,0.009	0.129
SE.RGD1305350.5.164756336.164756476.164754972.164755826.164756975.164757680	0	0.122,0.061,0.234	0.012,0.007,0.009	0.13
SE.RGD1305350.5.164756314.164756476.164754972.164755826.164756975.164757680	0	0.161,0.101,0.268	0.03,0.019,0.026	0.152
SE.Slc25a12.3.57941164.57941268.57936953.57937093.57946207.57946323	0	0.282,0.213,0.168	0.01,0.007,0.006	0.213
SE.Tnrc18.12.13843249.13843405.13810179.13810482.13846063.13846189	0	0.716,0.637,0.62	0.226,0.288,0.201	0.419
SE.Ddb2.3.80031101.80031147.80030436.80030871.80031279.80031444	0	0.479,0.416,0.209	1.0,1.0,1.0	-0.632
SE.Dip2a.20.13085305.13085503.13082962.13083082.13087590.13087682	0	0.853,0.766,0.718	1.0,1.0,1.0	-0.221
SE.Dip2a.20.13085310.13085503.13082962.13083082.13087590.13087682	0	0.77,0.696,0.599	1.0,1.0,1.0	-0.312
SE.Creld1.4.145446353.145446520.145445155.145445381.145446614.145446710	0	0.765,0.785,0.749	1.0,1.0,1.0	-0.234
SE.Creld1.4.145446353.145446530.145445289.145445381.145446614.145446710	0	0.882,0.889,0.856	1.0,1.0,1.0	-0.124
SE.Hjurp.9.95359904.95360043.95359444.95359500.95361767.95361834	0	0.143,0.155,0.139	0.0,0.0,0.0	0.146
SE.Tepsin.10.109275902.109275978.109275712.109275784.109276189.109276257	0	0.77,0.762,0.564	1.0,1.0,1.0	-0.301
SE.Hjurp.9.95359900.95360043.95359444.95359500.95361767.95361834	0	0.231,0.265,0.3	0.0,0.007,0.0	0.263
SE.Por.12.24000608.24000722.24000059.24000241.24000951.24001070	0	0.064,0.09,0.15	0.0,0.0,0.0	0.101
SE.Zfp280d.8.78897471.78897589.78893330.78893440.78897841.78897951	0	0.173,0.358,0.382	0.015,0.029,0.018	0.284
SE.Ptpn23.8.118629923.118630028.118629705.118629844.118630131.118630316	0	0.873,0.773,0.611	1.0,1.0,1.0	-0.248
SE.Fnip2.2.178273914.178274004.178272369.178272441.178274159.178274260	0	0.881,0.796,0.87	0.441,0.395,0.427	0.428
SE.Syvn1.1.221411125.221411278.221410946.221411039.221411370.221411419	0	0.826,0.793,0.492	1.0,1.0,1.0	-0.296
SE.Syvn1.1.221411264.221411278.221410946.221411039.221411370.221411419	0	0.349,0.427,0.119	1.0,1.0,1.0	-0.702
SE.Myo10.2.78069238.78069430.78065698.78066151.78070963.78071263	0	0.913,0.883,0.812	0.983,1.0,0.989	-0.121
SE.Sgo2.9.64917254.64917405.64913001.64915617.64922718.64922821	0	0.776,0.73,0.522	0.986,1.0,0.971	-0.31
SE.Plekhm1.10.91488617.91488713.91486181.91486429.91492505.91492591	0	0.295,0.232,0.293	0.0,0.0,0.0	0.273
SE.Ctdsp1.9.81674746.81674851.81674217.81674366.81674984.81675041	0	0.885,0.875,0.754	0.981,0.975,0.993	-0.145
SE.Scarb1.12.36757630.36757759.36754897.36755063.36760701.36761455	0	0.862,0.873,0.758	0.993,1.0,0.994	-0.165
SE.Scarb1.12.36757630.36757770.36754916.36755063.36760701.36761443	0	0.738,0.733,0.579	0.982,1.0,0.987	-0.306
SE.Scarb1.12.36757633.36757759.36754897.36755063.36760701.36761455	0	0.763,0.795,0.625	0.988,1.0,0.989	-0.265
SE.Stat1.9.54327359.54327545.54324390.54324521.54327857.54327958	0	0.723,0.732,0.679	0.944,0.896,0.909	-0.205
SE.Uap1.13.88469794.88469842.88464907.88464974.88471357.88471546	0	0.184,0.163,0.167	0.793,0.671,0.742	-0.564
SE.Uap1.13.88469794.88469845.88464907.88464974.88471357.88471546	0	0.202,0.199,0.121	0.808,0.695,0.751	-0.577
SE.Zfp511.1.212360143.212360345.212359742.212359816.212360431.212360556	0	0.825,0.78,0.763	1.0,0.986,0.99	-0.203
SE.Lsm14b.3.175415535.175415613.175415126.175415294.175415784.175415946	0	0.193,0.128,0.027	0.949,0.794,0.782	-0.726
SE.Pom121.12.24335605.24337219.24334790.24334964.24339343.24339466	0	0.776,0.696,0.54	1.0,1.0,1.0	-0.329
SE.Cnot1.19.9751541.9751790.9748793.9749025.9752846.9753010	0	0.7,0.702,0.575	1.0,1.0,0.996	-0.34
SE.Ano6.7.137185961.137186024.137142169.137142329.137216396.137216479	0	0.892,0.841,0.927	0.589,0.469,0.529	0.358
SE.Tns2.7.143710446.143710549.143710168.143710207.143710712.143710762	0	0.571,0.408,0.233	1.0,1.0,0.983	-0.59
SE.Tns2.7.143710510.143710549.143710088.143710207.143710712.143710762	0	0.896,0.81,0.694	1.0,1.0,0.998	-0.199
SE.Tns2.7.143710377.143710549.143710168.143710207.143710712.143710762	0	0.507,0.353,0.194	1.0,1.0,0.978	-0.641
SE.Eif3k.1.87933485.87933586.87932823.87932898.87935848.87935947	0	0.906,0.91,0.787	0.998,1.0,1.0	-0.132
SE.Bag6.20.5133248.5133339.5133040.5133118.5133460.5133573	0	0.301,0.262,0.24	0.602,0.542,0.623	-0.321
SE.Bag6.20.5132304.5132322.5131278.5131408.5132547.5132800	0	0.401,0.295,0.212	0.838,0.855,0.973	-0.586
SE.Bag6.20.5132124.5132259.5131278.5131408.5132547.5132800	0	0.814,0.788,0.708	0.973,0.981,0.997	-0.214
SE.Bag6.20.5133293.5133339.5133040.5133118.5133460.5133573	0	0.16,0.158,0.142	0.429,0.349,0.446	-0.255
SE.Bag6.20.5133231.5133339.5133040.5133118.5133460.5133573	0	0.498,0.479,0.416	0.77,0.772,0.793	-0.314
SE.Smarcd1.7.141360719.141360881.141360341.141360487.141361001.141361099	0	0.763,0.725,0.625	1.0,1.0,1.0	-0.296
SE.Mbnl2.15.105772350.105772403.105764134.105764288.105795143.105797932	0	0.073,0.045,0.038	0.345,0.205,0.276	-0.223
SE.Mbnl2.15.105772324.105772403.105764134.105764288.105795143.105797932	0	0.092,0.076,0.047	0.374,0.245,0.327	-0.244
SE.Mbnl2.15.105772308.105772403.105764134.105764288.105795143.105797932	0	0.239,0.154,0.113	0.628,0.52,0.58	-0.407
SE.Lypla1.5.14565684.14565786.14564596.14564773.14568232.14568306	0	0.519,0.454,0.321	0.991,0.995,0.997	-0.563
SE.Lypla1.5.14565684.14565820.14564596.14564773.14568232.14568306	0	0.286,0.236,0.118	0.97,0.984,0.99	-0.768
SE.Ldb1.1.265788976.265789021.265788781.265788857.265789147.265789250	0	0.877,0.829,0.685	1.0,1.0,1.0	-0.203
SE.Zwilch.8.69118552.69118721.69117977.69118029.69121118.69121192	0	0.182,0.206,0.186	0.0,0.0,0.002	0.191
SE.Zwilch.8.69118552.69118704.69117977.69118029.69121118.69121192	0	0.169,0.132,0.175	0.0,0.0,0.0	0.159
SE.Col6a3.9.97972527.97973127.97970548.97971121.97975280.97975865	0	0.153,0.191,0.249	0.66,0.828,0.782	-0.559
SE.Col6a3.9.97981211.97981814.97975280.97975865.97989209.97989297	0	0.078,0.182,0.141	0.496,0.627,0.665	-0.462
SE.Usp24.5.125997022.125997091.125996693.125996819.125997536.125997635	0	0.19,0.043,0.274	0.0,0.0,0.0	0.169
SE.Card19.17.15856532.15856686.15854026.15854169.15857902.15857974	0	0.718,0.635,0.402	1.0,1.0,1.0	-0.415
SE.Card19.17.15856532.15856686.15854026.15854169.15857683.15857743	0	0.915,0.769,0.632	0.998,1.0,1.0	-0.227
SE.Card19.17.15854026.15854179.15845930.15846002.15857902.15857974	0	0.765,0.746,0.698	0.922,0.959,0.995	-0.222
SE.Card19.17.15857683.15857743.15854026.15854169.15857902.15857974	0	0.691,0.648,0.505	1.0,1.0,1.0	-0.385
SE.Atg9a.9.82384599.82384822.82384291.82384437.82386180.82386298	0	0.916,0.761,0.771	1.0,1.0,0.993	-0.182
SE.Stoml1.8.63040454.63040604.63038734.63038841.63040836.63041040	0	0.571,0.615,0.55	0.893,0.848,0.952	-0.319
SE.Wnk1.4.152481966.152482251.152481774.152481828.152485416.152485539	0	0.617,0.381,0.358	1.0,1.0,1.0	-0.548
SE.Wnk1.4.152481966.152482251.152481172.152481273.152483052.152483184	0	0.318,0.488,0.373	0.919,0.968,0.943	-0.55
SE.Wnk1.4.152481774.152481828.152481172.152481273.152481966.152482251	0	0.329,0.405,0.39	0.0,0.0,0.0	0.375
SE.Wnk1.4.152481774.152481828.152481172.152481273.152485416.152485539	0	0.094,0.137,0.128	0.0,0.0,0.0	0.12
SE.Hdac5.10.90149232.90149364.90148827.90149050.90149692.90149805	0	0.893,0.742,0.553	0.994,1.0,1.0	-0.269
SE.Scyl1.1.221118115.221118304.221117922.221117998.221119184.221119340	0	0.823,0.813,0.586	0.992,1.0,0.997	-0.256
SE.Elp5.10.56579897.56579984.56578984.56579314.56580411.56580507	0	0.597,0.682,0.573	0.993,1.0,0.97	-0.37
SE.Scyl1.1.221118115.221118172.221117922.221117998.221119184.221119340	0	0.558,0.544,0.274	0.97,1.0,0.986	-0.527
SE.Scyl1.1.221118115.221118272.221117922.221117998.221119184.221119340	0	0.704,0.687,0.41	0.986,1.0,0.993	-0.393
SE.Elp5.10.56579897.56579953.56578984.56579314.56580411.56580507	0	0.583,0.641,0.554	0.991,1.0,0.967	-0.393
SE.Elp5.10.56579892.56579998.56578984.56579314.56580411.56580507	0	0.604,0.681,0.465	0.992,1.0,0.968	-0.403
SE.Elp5.10.56579897.56579998.56578984.56579314.56580411.56580507	0	0.781,0.846,0.728	0.997,1.0,0.987	-0.21
SE.Elp5.10.56579897.56580012.56578984.56579314.56580411.56580507	0	0.603,0.689,0.554	0.993,1.0,0.969	-0.372
SE.Elp5.10.56579858.56579998.56578984.56579314.56580411.56580507	0	0.572,0.656,0.433	0.991,1.0,0.965	-0.432
SE.Pomgnt1.5.135012336.135012472.135012174.135012255.135012569.135012628	0	0.824,0.746,0.633	1.0,1.0,1.0	-0.266
SE.Tmem199.10.65776936.65777049.65775714.65776471.65777255.65777298	0	0.837,0.925,0.715	0.987,0.983,0.997	-0.163
SE.Gle1.3.8525505.8525598.8522340.8522423.8525925.8525989	0	0.467,0.487,0.488	0.0,0.035,0.035	0.457
SE.Dmtf1.4.21899881.21900037.21897293.21897379.21900371.21900746	0	0.804,0.687,0.696	1.0,1.0,1.0	-0.271
SE.Dmtf1.4.21899896.21900037.21897293.21897379.21900371.21900746	0	0.669,0.508,0.519	1.0,1.0,1.0	-0.435
SE.Tmem208.19.37284245.37284330.37283916.37284109.37284432.37284718	0	0.808,0.823,0.766	0.992,1.0,0.997	-0.197
SE.Ccnk.6.132109504.132109579.132106713.132106747.132112294.132113557	0	0.797,0.788,0.713	1.0,1.0,0.989	-0.23
SE.Eif1ad.1.220747977.220748150.220746386.220746791.220748296.220748359	0	0.572,0.532,0.515	0.981,0.917,0.974	-0.418
SE.Eif1ad.1.220748019.220748150.220746386.220746791.220748296.220748359	0	0.548,0.495,0.484	0.98,0.916,0.971	-0.447
SE.Eif1ad.1.220747931.220748150.220746386.220746791.220748296.220748359	0	0.694,0.666,0.629	0.989,0.95,0.985	-0.312
SE.Eif1ad.1.220748062.220748150.220746386.220746791.220748296.220748359	0	0.463,0.425,0.424	0.972,0.884,0.961	-0.502
SE.Eif1ad.1.220748016.220748150.220746386.220746791.220748296.220748405	0	0.545,0.497,0.481	0.98,0.916,0.971	-0.448
SE.AABR07073181.1.5.155853497.155853543.155851503.155851664.155853919.155854048	0	0.411,0.344,0.352	0.068,0.099,0.087	0.284
SE.AABR07073181.1.5.155853492.155853543.155851503.155851664.155853919.155854048	0	0.8,0.77,0.765	0.305,0.441,0.36	0.41
SE.Vps52.20.5441056.5441182.5440761.5440846.5441376.5441706	0	0.112,0.144,0.14	0.01,0.0,0.004	0.127
SE.Vps52.20.5441056.5441185.5440761.5440846.5441376.5441706	0	0.115,0.16,0.182	0.01,0.009,0.009	0.143
SE.Nf1x.19.25829124.25829272.25826876.25826968.25836720.25836843	0	0.387,0.305,0.397	1.0,1.0,1.0	-0.637
SE.Nf1x.19.25829124.25829272.25826876.25826968.25839497.25839634	0	0.132,0.162,0.169	0.966,0.921,0.945	-0.79
SE.Nf1x.19.25836720.25836843.25826876.25826968.25839497.25839634	0	0.582,0.594,0.554	0.998,0.995,0.996	-0.42
SE.Nf1x.19.25834565.25834741.25826876.25826968.25839497.25839634	0	0.783,0.776,0.672	0.999,0.998,0.998	-0.255
SE.Cmip.19.49996002.49996149.49994708.49994756.49996707.49996813	0	0.708,0.8,0.664	0.999,1.0,0.999	-0.275
SE.Ppp2r3c.6.76075734.76075887.76075220.76075348.76079085.76079283	0	0.239,0.363,0.534	0.0,0.0,0.022	0.371
SE.Cul1.4.77277198.77277246.77274872.77274965.77277322.77277405	0	0.814,0.857,0.697	0.978,0.99,0.984	-0.195
SE.Immt.4.99769621.99769711.99769223.99769313.99773138.99773275	0	0.19,0.226,0.253	0.066,0.096,0.072	0.145
SE.Immt.4.99769615.99769711.99768236.99768339.99773138.99773275	0	0.744,0.853,0.842	0.432,0.355,0.323	0.443
SE.Immt.4.99769615.99769711.99769196.99769313.99773138.99773275	0	0.373,0.426,0.461	0.154,0.182,0.154	0.257
SE.Tcp1.1.48032167.48032251.48031915.48032044.48033202.48033343	0	0.791,0.86,0.678	0.948,0.963,0.964	-0.182
SE.Pnpla6.12.2085712.2085826.2085399.2085523.2086003.2086079	0	0.69,0.635,0.593	0.982,1.0,1.0	-0.355
SE.Bckdha.1.82426699.82426861.82424962.82425169.82431364.82431473	0	0.678,0.489,0.501	0.903,0.986,0.995	-0.405
SE.Dnajb2.9.82439113.82439167.82437495.82437605.82439330.82439453	0	0.858,0.776,0.821	0.995,0.967,0.973	-0.16
SE.Yif1a.1.220473269.220473425.220473067.220473125.220473753.220473847	0	0.776,0.706,0.487	0.997,0.995,0.989	-0.337
SE.Yif1a.1.220470891.220471103.220470088.220470254.220471472.220471511	0	0.745,0.808,0.627	0.975,0.95,0.934	-0.226
SE.Yif1a.1.220473269.220473416.220473067.220473125.220473753.220473847	0	0.67,0.532,0.342	0.994,0.99,0.978	-0.473
SE.Nacc1.19.25787788.25787894.25787593.25787691.25788723.25788897	0	0.804,0.789,0.615	1.0,1.0,0.996	-0.263
SE.Nacc1.19.25787783.25787894.25787593.25787691.25788723.25788897	0	0.654,0.633,0.411	1.0,1.0,0.99	-0.431
SE.Edem2.3.151248675.151248797.151248236.151248362.151251964.151252070	0	0.142,0.053,0.234	0.005,0.0,0.0	0.141
SE.Svil.17.55289394.55290249.55288179.55288214.55297975.55298582	0	0.797,0.747,0.955	0.056,0.169,0.126	0.716
SE.G2e3.6.72099285.72099362.72097747.72097788.72099699.72099797	0	0.539,0.654,0.895	0.0,0.0,0.047	0.68
SE.G2e3.6.72099285.72099367.72097747.72097788.72099699.72099797	0	0.353,0.514,0.798	0.0,0.0,0.008	0.552
SE.G2e3.6.72099285.72099358.72097751.72097788.72099699.72099797	0	0.353,0.521,0.813	0.0,0.0,0.008	0.56
SE.Stag2.X.128596931.128597012.128596741.128596829.128598297.128598390	0	0.896,0.825,0.737	1.0,1.0,1.0	-0.181
SE.Gpat4.16.73643285.73643375.73642472.73642547.73643515.73643609	0	0.813,0.818,0.56	1.0,0.991,0.998	-0.266
SE.Dpp8.8.70569107.70569219.70568255.70568398.70572479.70573424	0	0.823,0.646,0.54	1.0,0.997,0.986	-0.325
SE.Clec16a.10.5170129.5170251.5169680.5169786.5174310.5174459	0	0.139,0.373,0.303	0.0,0.0,0.0	0.272
SE.Cmtm7.8.122820560.122820650.122816372.122816454.122822048.122822222	0	0.917,0.912,0.84	0.99,1.0,1.0	-0.107
SE.Tigar.4.159641018.159641140.159639597.159639650.159645178.159645216	0	0.523,0.559,0.463	1.0,1.0,0.967	-0.474
SE.Mpdz.5.99492451.99492568.99490709.99490877.99493804.99494014	0	0.348,0.465,0.352	0.885,0.846,0.917	-0.494
SE.Prtfdc1.17.87929429.87929517.87928989.87929066.87931271.87931318	0	0.886,0.879,0.919	0.185,0.251,0.158	0.697
SE.Prtfdc1.17.87929406.87929517.87928989.87929066.87931271.87931318	0	0.807,0.778,0.835	0.035,0.157,0.062	0.722
SE.Mast2.5.135151186.135151380.135149306.135150896.135151464.135151601	0	0.814,0.9,0.711	0.989,1.0,1.0	-0.188
SE.Mast2.5.135151186.135151314.135149306.135150896.135151464.135151601	0	0.489,0.643,0.408	0.94,1.0,1.0	-0.467
SE.Myef2.3.117363827.117363878.117363479.117363548.117365290.117365392	0	0.564,0.567,0.492	0.814,0.765,0.809	-0.255
SE.Mast2.5.135151186.135151371.135149306.135150896.135151464.135151601	0	0.669,0.774,0.519	0.974,1.0,1.0	-0.337
SE.Trnau1ap.5.150505870.150505968.150502625.150502678.150506776.150506871	0	0.563,0.631,0.659	0.933,0.891,0.918	-0.296
SE.Emc8.19.54236650.54236721.54235935.54236377.54237128.54237270	0	0.816,0.859,0.807	1.0,1.0,1.0	-0.173
SE.Mta1.6.137946496.137946580.137946188.137946341.137948796.137948828	0	0.342,0.296,0.175	0.828,0.812,0.921	-0.583
SE.Mta1.6.137946544.137946580.137946188.137946341.137948796.137948828	0	0.78,0.747,0.459	0.962,0.961,0.986	-0.308
SE.Isca2.6.108489157.108489180.108488939.108489042.108489677.108490188	0	0.358,0.338,0.233	0.743,0.829,0.794	-0.479
SE.Lrrc49.8.65580102.65580300.65579669.65579772.65584499.65584587	0	0.517,0.668,0.738	0.183,0.146,0.152	0.481
SE.Mbnl1.2.150864085.150864121.150858305.150858459.150864801.150864896	0	0.163,0.14,0.194	0.478,0.41,0.449	-0.28
SE.Mbnl1.2.150864085.150864121.150858305.150858459.150867718.150867793	0	0.04,0.066,0.048	0.509,0.464,0.487	-0.435
SE.Mbnl1.2.150864801.150864896.150858410.150858459.150867718.150867793	0	0.331,0.337,0.361	0.764,0.753,0.771	-0.42
SE.Ktn1.15.24543997.24544081.24543754.24543838.24547892.24547976	0	0.345,0.312,0.234	0.67,0.63,0.567	-0.325
SE.Ktn1.15.24543411.24543541.24542211.24542304.24543754.24543838	0	0.234,0.142,0.104	0.521,0.415,0.535	-0.33
SE.Ktn1.15.24543469.24543541.24542211.24542304.24543754.24543838	0	0.617,0.52,0.392	0.894,0.844,0.878	-0.362
SE.Fam173b.2.84685933.84685984.84684491.84684619.84693299.84693988	0	0.684,0.457,0.464	0.96,1.0,1.0	-0.452
SE.Hint2.5.59150810.59150915.59150344.59150572.59151020.59151161	0	0.788,0.786,0.559	1.0,1.0,1.0	-0.289
SE.Atxn2l.1.197909898.197910020.197909511.197909724.197910112.197910242	0	0.84,0.77,0.485	1.0,1.0,1.0	-0.302
SE.Atxn2l.1.197910486.197910540.197910112.197910242.197910770.197910843	0	0.694,0.648,0.357	1.0,0.989,1.0	-0.43
SE.Atxn2l.1.197910486.197910677.197910112.197910242.197910770.197910843	0	0.908,0.883,0.685	1.0,0.997,1.0	-0.174
SE.Ino80e.1.198293260.198293377.198287489.198288898.198293705.198293752	0	0.627,0.424,0.339	0.94,0.967,0.935	-0.484
SE.Ino80e.1.198293260.198293326.198287489.198288898.198293705.198293752	0	0.497,0.379,0.236	0.873,0.916,0.877	-0.518
SE.Ino80e.1.198289397.198289489.198287489.198288898.198293705.198293817	0	0.24,0.24,0.185	0.764,0.834,0.719	-0.551
SE.Ino80e.1.198293260.198293490.198287489.198288898.198293705.198293752	0	0.417,0.233,0.142	0.86,0.906,0.852	-0.609
SE.Bicd2.17.15676996.15677027.15673649.15675690.15677425.15677636	0	0.094,0.172,0.13	0.004,0.005,0.005	0.127
SE.Dnm2.8.22512941.22513080.22511430.22511569.22513982.22514069	0	0.379,0.389,0.561	0.058,0.054,0.04	0.392
SE.Secisbp2l.3.118038291.118038616.118036335.118036471.118043321.118043500	0	0.752,0.702,0.452	1.0,1.0,1.0	-0.365
SE.Thoc6.10.12989697.12989831.12989611.12989613.12989891.12989954	0	0.834,0.644,0.496	1.0,1.0,1.0	-0.342
SE.Thoc6.10.12989697.12989808.12989478.12989613.12989891.12989954	0	0.925,0.863,0.714	1.0,1.0,1.0	-0.166
SE.Ubxn4.13.44987972.44988088.44986774.44986977.44988875.44990535	0	0.221,0.201,0.328	0.015,0.028,0.011	0.232
SE.Ubxn4.13.44987976.44988088.44986774.44986977.44988875.44990535	0	0.145,0.155,0.231	0.012,0.023,0.007	0.163
SE.Ubxn4.13.44987915.44988088.44986774.44986977.44988875.44990535	0	0.147,0.145,0.225	0.013,0.022,0.009	0.158
SE.Ubxn4.13.44987909.44988088.44986893.44986977.44988875.44990535	0	0.145,0.142,0.221	0.014,0.022,0.009	0.154
SE.Ubxn4.13.44987939.44988088.44986774.44986977.44988875.44990535	0	0.152,0.151,0.23	0.012,0.024,0.01	0.162
SE.Ubxn4.13.44987931.44988088.44986774.44986977.44988875.44990535	0	0.166,0.165,0.263	0.012,0.025,0.011	0.182
SE.Secisbp2l.3.118038291.118038506.118036335.118036471.118043321.118043500	0	0.686,0.643,0.344	1.0,1.0,1.0	-0.442
SE.Hey2.1.29193217.29193296.29191191.29191317.29193418.29193502	0	0.869,0.907,0.691	1.0,1.0,0.996	-0.176
SE.Smad1.19.32229582.32229840.32214550.32215127.32232462.32232633	0	0.762,0.796,0.62	0.971,0.979,0.984	-0.252
SE.Nans.5.62123458.62123691.62121535.62121690.62125369.62126494	0	0.915,0.866,0.788	0.995,0.993,0.991	-0.137
SE.Pcolce.12.22159546.22159697.22158283.22158564.22159793.22159964	0	0.833,0.871,0.753	1.0,1.0,0.997	-0.18
SE.Rnase4.15.28021967.28022093.28018039.28018087.28034102.28035389	0	0.105,0.154,0.19	0.012,0.025,0.017	0.132
SE.Ncoa6.3.150933172.150936148.150930332.150930401.150939131.150939253	0	0.679,0.6,0.495	1.0,1.0,1.0	-0.409
SE.Secisbp2l.3.118038317.118038506.118036335.118036471.118043321.118043500	0	0.341,0.298,0.104	1.0,1.0,1.0	-0.752
SE.Foxp1.4.131573998.131574116.131511427.131511625.131598111.131598302	0	0.37,0.38,0.597	0.0,0.0,0.014	0.444
SE.Foxp1.4.131574050.131574116.131511427.131511625.131598111.131598302	0	0.452,0.412,0.632	0.0,0.0,0.012	0.495
SE.Nelfa.14.82116555.82116827.82115628.82115740.82116975.82117075	0	0.806,0.815,0.795	1.0,1.0,1.0	-0.195
SE.Secisbp2l.3.118026767.118026877.118026285.118026366.118027530.118027665	0	0.065,0.183,0.283	0.0,0.0,0.0	0.177
SE.Smg9.1.81280971.81281079.81280328.81280435.81281196.81281325	0	0.787,0.684,0.446	1.0,1.0,1.0	-0.361
SE.Gkap1.17.6816561.6816708.6807553.6807576.6816946.6817048	0	1.0,0.651,0.876	0.026,0.0,0.031	0.823
SE.Tfdp1.16.81118881.81119003.81113893.81114000.81119909.81120219	0	0.948,0.903,0.817	0.988,1.0,0.993	-0.104
SE.Sart3.12.48653204.48653357.48652378.48652830.48653466.48653657	0	0.721,0.558,0.458	0.961,0.972,0.979	-0.392
SE.Prpf19.1.226951128.226951202.226949646.226949723.226951294.226951357	0	0.861,0.902,0.765	1.0,1.0,1.0	-0.157
SE.Depdc1.2.264723913.264724753.264722225.264722366.264725170.264725343	0	0.453,0.519,0.664	0.155,0.186,0.158	0.379
SE.Golga2.3.11325951.11326047.11321153.11321276.11326293.11326337	0	0.579,0.516,0.425	0.877,0.765,0.889	-0.337
SE.Gnb2.12.22231896.22231940.22231396.22231639.22232041.22232148	0	0.334,0.199,0.118	1.0,1.0,0.995	-0.781
SE.Gnb2.12.22231896.22231935.22231493.22231639.22232041.22232154	0	0.791,0.67,0.544	1.0,1.0,0.999	-0.331
SE.Akt2.1.84444444.84444510.84441565.84441697.84445251.84445320	0	0.868,0.768,0.756	0.992,0.984,0.978	-0.187
SE.St3gal4.8.36272426.36272522.36272118.36272322.36273190.36273251	0	0.879,0.468,0.417	1.0,1.0,1.0	-0.412
SE.Pdlim7.17.9659208.9659225.9658728.9658847.9659478.9659615	0	0.13,0.158,0.2	0.018,0.021,0.023	0.142
SE.Pdlim7.17.9658728.9658847.9658263.9658294.9659208.9659229	0	0.427,0.307,0.303	0.85,0.851,0.883	-0.516
SE.Hp1bp3.5.156586994.156587188.156581731.156581854.156587558.156587658	0	0.595,0.536,0.357	0.974,0.991,0.981	-0.486
SE.Hp1bp3.5.156586994.156587114.156581731.156581854.156587558.156587658	0	0.306,0.244,0.158	0.932,0.976,0.952	-0.717
SE.Hp1bp3.5.156586994.156587183.156581731.156581854.156587558.156587658	0	0.444,0.383,0.262	0.961,0.985,0.971	-0.609
SE.Grb14.3.50954584.50954695.50954286.50954395.50958083.50958221	0	0.818,0.784,0.605	0.991,0.983,0.978	-0.248
SE.Rbm26.15.89295925.89295997.89288542.89288668.89297167.89297290	0	0.397,0.264,0.216	0.913,0.921,0.815	-0.591
SE.Arhgef40.15.28393456.28393691.28392730.28393341.28393981.28394068	0	0.849,0.758,0.748	0.995,0.987,0.978	-0.202
SE.Fam149b1.15.4390891.4391117.4390126.4390243.4392149.4392292	0	0.106,0.276,0.316	0.021,0.03,0.003	0.215
SE.Tpra1.4.120847110.120847200.120843452.120843608.120849649.120849781	0	0.12,0.144,0.105	0.616,0.586,0.666	-0.5
SE.Tpra1.4.120852300.120852441.120852126.120852187.120852588.120852669	0	0.668,0.698,0.558	1.0,1.0,1.0	-0.359
SE.Dennd1b.13.56120365.56120425.56115264.56115341.56121584.56121638	0	0.571,0.498,0.915	0.0,0.0,0.015	0.656
SE.Tpra1.4.120852365.120852441.120852126.120852187.120852588.120852669	0	0.636,0.701,0.542	1.0,1.0,1.0	-0.374
SE.Zfpl1.1.221445836.221445983.221445472.221445590.221446054.221446127	0	0.896,0.76,0.584	1.0,1.0,0.996	-0.252
SE.Tpra1.4.120847110.120847193.120843452.120843608.120849649.120849781	0	0.454,0.472,0.224	0.832,0.88,0.883	-0.482
SE.Efemp2.1.220859726.220859759.220857845.220857965.220859843.220859999	0	0.862,0.826,0.683	0.964,0.969,0.992	-0.185
SE.Tpra1.4.120852338.120852441.120852126.120852187.120852588.120852669	0	0.818,0.834,0.756	1.0,1.0,1.0	-0.197
SE.Numa1.1.167077643.167077867.167073666.167077020.167083448.167083613	0	0.101,0.09,0.027	0.69,0.697,0.624	-0.598
SE.Numa1.1.167077643.167077685.167073666.167077020.167083448.167083517	0	0.462,0.349,0.167	0.945,0.949,0.939	-0.618
SE.Ralgapa1.6.76551152.76551234.76549323.76549448.76552520.76552688	0	0.34,0.187,0.054	0.931,1.0,0.812	-0.721
SE.Samd4b.1.85357849.85357973.85357528.85357727.85359895.85359979	0	0.836,0.749,0.557	1.0,1.0,1.0	-0.286
SE.Ppip5k2.9.111265365.111265413.111264869.111264986.111268832.111268997	0	0.254,0.418,0.683	0.0,0.0,0.0	0.452
SE.Tfcp2.7.142156361.142156514.142154398.142154509.142158275.142158382	0	0.713,0.639,0.699	1.0,1.0,1.0	-0.316
SE.Tfcp2.7.142156351.142156514.142154398.142154509.142158275.142158382	0	0.459,0.384,0.561	1.0,1.0,1.0	-0.532
SE.Myrf.1.226264155.226264230.226263719.226263825.226264449.226264537	0	0.905,0.781,0.625	1.0,0.993,0.996	-0.226
SE.Myrf.1.226264155.226264197.226263719.226263825.226264449.226264537	0	0.662,0.409,0.259	1.0,0.965,0.98	-0.538
SE.Mical2.1.177054136.177054272.177048654.177048785.177057882.177057960	0	0.143,0.088,0.171	0.012,0.0,0.001	0.13
SE.Tbccd1.11.81788708.81788926.81785696.81785811.81789539.81789689	0	0.274,0.422,0.33	0.0,0.022,0.031	0.324
SE.Actn1.6.103379313.103379379.103378007.103378166.103379819.103379900	0	0.823,0.862,0.86	0.111,0.123,0.103	0.736
SE.Actn1.6.103379819.103379900.103379204.103379379.103380858.103381005	0	0.033,0.018,0.021	0.571,0.452,0.526	-0.492
SE.Actn1.6.103379819.103379900.103378007.103378166.103380858.103381005	0	0.877,0.75,0.622	0.993,0.994,0.993	-0.244
SE.Mrps11.1.140484993.140485123.140483136.140483235.140486202.140486268	0	0.801,0.735,0.558	0.962,0.995,0.969	-0.277
SE.Pes1.14.84224457.84224574.84221795.84222057.84224668.84224743	0	0.647,0.638,0.512	1.0,1.0,1.0	-0.401
SE.Pes1.14.84224429.84224574.84221795.84222057.84224668.84224743	0	0.42,0.444,0.275	1.0,1.0,1.0	-0.62
SE.Ahsa2.14.108266475.108266589.108266018.108266120.108267289.108267378	0	0.699,0.568,0.475	1.0,1.0,0.989	-0.416
SE.Ahsa2.14.108266475.108266583.108266018.108266120.108267289.108267366	0	0.83,0.754,0.701	1.0,1.0,0.995	-0.237
SE.Uspl1.12.6949056.6949255.6944080.6944194.6949473.6949660	0	0.491,0.542,0.487	0.954,0.965,0.982	-0.46
SE.Dst.9.37914027.37914045.37910912.37911079.37915172.37915247	0	0.83,0.654,0.603	0.969,0.982,0.95	-0.271
SE.Cln6.8.67734787.67734916.67733214.67733304.67740045.67740160	0	0.272,0.19,0.442	0.03,0.035,0.045	0.265
SE.Phldb1.8.49009515.49009560.49008610.49008905.49010003.49010106	0	0.111,0.111,0.076	0.517,0.517,0.51	-0.415
SE.Phldb1.8.49036099.49036270.49028538.49028664.49037122.49037242	0	0.908,0.875,0.773	1.0,1.0,1.0	-0.148
SE.Jkamp.6.94843039.94843246.94839892.94840034.94846451.94846633	0	0.741,0.656,0.512	0.989,1.0,0.997	-0.359
SE.Jkamp.6.94843045.94843246.94839892.94840034.94846451.94846633	0	0.614,0.515,0.325	0.98,1.0,0.993	-0.506
SE.Kif23.8.66882374.66882419.66881231.66881344.66884309.66884480	0	0.06,0.026,0.021	0.205,0.247,0.297	-0.214
SE.Kif23.8.66882374.66882416.66881231.66881344.66884309.66884502	0	0.083,0.047,0.013	0.333,0.256,0.314	-0.253
SE.Nup54.14.17127518.17127671.17127346.17127430.17129926.17130153	0	0.61,0.612,0.347	1.0,0.967,1.0	-0.466
SE.Synj1.11.31118345.31118480.31115311.31115382.31119756.31119966	0	0.667,0.686,0.487	1.0,1.0,1.0	-0.387
SE.Itga7.7.3363529.3363649.3363146.3363278.3364518.3364726	0	0.045,0.038,0.079	0.282,0.205,0.249	-0.191
SE.Kif1c.10.57324568.57324701.57322330.57322439.57325091.57325114	0	0.886,0.913,0.861	0.991,0.987,1.0	-0.106
SE.Kif1c.10.57324242.57324348.57322330.57322439.57325091.57325114	0	0.396,0.486,0.406	0.937,0.87,1.0	-0.506
SE.Kif1c.10.57324228.57324348.57322330.57322439.57325091.57325114	0	0.525,0.544,0.544	0.966,0.925,1.0	-0.426
SE.Raver1.8.22093503.22093587.22092093.22093422.22093915.22094042	0	0.888,0.796,0.723	0.998,0.966,0.99	-0.182
SE.Map4.8.118147157.118147264.118145210.118145313.118148700.118148793	0	0.908,0.88,0.811	0.988,0.982,0.992	-0.121
SE.Dazap1.7.12293655.12293791.12292840.12293017.12293938.12293968	0	0.808,0.922,0.723	1.0,1.0,1.0	-0.182
SE.Zfr.2.62170401.62170684.62150492.62150529.62171507.62171652	0	0.77,0.734,0.598	1.0,1.0,1.0	-0.299
SE.Zfr.2.62150818.62150918.62150250.62150529.62171507.62171652	0	0.658,0.586,0.505	1.0,1.0,1.0	-0.417
SE.Sap30bp.10.104512924.104513009.104511594.104511653.104513269.104515684	0	0.853,0.697,0.788	1.0,1.0,1.0	-0.221
SE.Sap30bp.10.104510388.104510449.104509475.104509567.104510775.104510827	0	0.714,0.661,0.561	1.0,1.0,0.998	-0.354
SE.Stx4.1.199294767.199294866.199294583.199294697.199294949.199294979	0	0.881,0.935,0.777	0.995,0.989,0.994	-0.128
SE.Sipa1l2.19.58240974.58241028.58240335.58240459.58250887.58251019	0	0.281,0.429,0.464	0.044,0.016,0.0	0.371
SE.Ube2f.9.98427654.98427855.98425500.98425563.98428077.98428128	0	0.112,0.117,0.158	0.002,0.008,0.002	0.125
SE.Bmp1.15.52179580.52179700.52178048.52178269.52181119.52181300	0	0.397,0.4,0.376	0.041,0.003,0.018	0.37
SE.Col18a1.20.12329323.12329554.12327902.12327935.12330109.12330307	0	0.846,0.765,0.694	1.0,1.0,1.0	-0.232
SE.Col18a1.20.12329284.12329554.12327874.12327935.12330109.12330307	0	0.925,0.881,0.848	1.0,1.0,1.0	-0.115
SE.Stk16.9.82413115.82413231.82412888.82413009.82413592.82413714	0	0.206,0.073,0.065	0.778,0.59,0.795	-0.606
SE.Stk16.9.82413135.82413231.82412898.82413009.82413592.82413714	0	0.383,0.185,0.157	0.879,0.763,0.912	-0.61
SE.Paqr6.2.187739089.187739494.187738880.187739008.187740119.187740125	0	0.023,0.035,0.026	0.162,0.185,0.188	-0.15
SE.Ccdc47.10.94400079.94400304.94398942.94399064.94401071.94401246	0	0.054,0.089,0.215	0.007,0.009,0.009	0.111
SE.Ccdc47.10.94400079.94400270.94398942.94399064.94401071.94401246	0	0.049,0.081,0.22	0.008,0.008,0.008	0.109
SE.Srek1.2.33811088.33811233.33809806.33810157.33814364.33814460	0	0.935,0.882,0.814	1.0,1.0,1.0	-0.123
SE.Atf2.3.60748410.60748589.60747626.60747741.60752746.60752875	0	0.836,0.708,0.491	1.0,1.0,1.0	-0.322
SE.Atf2.3.60748410.60748537.60747626.60747741.60752746.60752875	0	0.735,0.499,0.314	1.0,1.0,1.0	-0.484
SE.Arhgef10l.5.159072315.159072330.159071900.159072082.159074506.159074679	0	0.14,0.164,0.15	0.774,0.811,0.816	-0.649
SE.Epb41l2.1.20908297.20908396.20903057.20903369.20909566.20909713	0	0.36,0.369,0.445	0.069,0.056,0.067	0.327
SE.Epb41l2.1.20903567.20903624.20903057.20903369.20916098.20916262	0	0.354,0.531,0.725	0.046,0.029,0.036	0.5
SE.Epb41l2.1.20903567.20903624.20903057.20903369.20909566.20909713	0	0.246,0.285,0.28	0.016,0.009,0.016	0.257
SE.Epb41l2.1.20908306.20908396.20903057.20903369.20909566.20909713	0	0.399,0.401,0.463	0.108,0.127,0.079	0.316
SE.Epb41l2.1.20911504.20911567.20909616.20909713.20916098.20916262	0	0.893,0.907,0.891	1.0,1.0,1.0	-0.103
SE.Srpra.8.36411580.36411598.36410682.36410909.36411870.36412034	0	0.443,0.525,0.235	1.0,1.0,0.96	-0.586
SE.Mgrn1.10.10834443.10834615.10833518.10834040.10835899.10835944	0	0.105,0.08,0.161	0.005,0.007,0.002	0.111
SE.Brd3.3.6011305.6011520.6009208.6009580.6012151.6012299	0	0.829,0.909,0.624	1.0,1.0,1.0	-0.213
SE.Eef1e1.17.26787491.26787692.26785028.26785121.26788591.26788687	0	0.899,0.886,0.841	1.0,1.0,1.0	-0.125
SE.Mus81.1.220863401.220863432.220863221.220863325.220863695.220863791	0	0.29,0.223,0.075	0.9,1.0,1.0	-0.771
SE.Mus81.1.220863401.220863530.220863221.220863325.220863695.220863791	0	0.719,0.527,0.336	0.988,1.0,1.0	-0.469
SE.Kmt2a.8.49123802.49123918.49123395.49123460.49125073.49125154	0	0.29,0.418,0.392	0.028,0.0,0.0	0.357
SE.Fat1.16.50374547.50374583.50372127.50373577.50379255.50379358	0	0.802,0.795,0.776	0.419,0.474,0.407	0.358
SE.Fat1.16.50374547.50374636.50372127.50373577.50379255.50379492	0	0.46,0.431,0.455	0.125,0.162,0.118	0.314
SE.Als2cl.8.119165199.119165300.119164875.119165093.119165659.119165856	0	0.609,0.401,0.249	1.0,1.0,1.0	-0.58
SE.Als2cl.8.119165233.119165300.119165034.119165093.119165659.119165856	0	0.858,0.711,0.686	1.0,1.0,1.0	-0.248
SE.Stat6.7.70962966.70963036.70962175.70962222.70963122.70963251	0	0.833,0.74,0.599	1.0,1.0,1.0	-0.276
SE.Stat6.7.70962966.70963032.70962138.70962222.70963122.70963251	0	0.942,0.9,0.834	1.0,1.0,1.0	-0.108
SE.Stat6.7.70962966.70963032.70961845.70961977.70963122.70963251	0	0.916,0.859,0.732	1.0,1.0,0.995	-0.163
SE.Ccser2.16.14105349.14105482.14095057.14095320.14111118.14111208	0	0.068,0.107,0.046	0.439,0.392,0.501	-0.37
SE.Ccser2.16.14105397.14105446.14095057.14095320.14111118.14111208	0	0.055,0.046,0.011	0.307,0.245,0.405	-0.282
SE.Ccser2.16.14105397.14105482.14095057.14095320.14111118.14111208	0	0.21,0.257,0.123	0.654,0.624,0.735	-0.474
SE.Ccser2.16.14105298.14105482.14095057.14095320.14111118.14111208	0	0.058,0.091,0.045	0.408,0.348,0.467	-0.343
SE.Ccser2.16.14105393.14105482.14095057.14095320.14111118.14111208	0	0.08,0.125,0.054	0.48,0.434,0.543	-0.399
SE.Nipbl.2.57516419.57516566.57514493.57514768.57520889.57521090	0	0.901,0.84,0.656	1.0,1.0,1.0	-0.201
SE.Nipbl.2.57516419.57516506.57514493.57514768.57520889.57521090	0	0.722,0.709,0.49	1.0,1.0,1.0	-0.36
SE.Fermt2.15.19811925.19811946.19811319.19811444.19813970.19814192	0	0.086,0.138,0.274	0.004,0.005,0.005	0.161
SE.Fermt2.15.19825648.19825681.19825113.19825339.19832372.19832507	0	0.29,0.435,0.437	0.032,0.028,0.025	0.359
SE.LOC100909912.3.162690240.162691175.162687970.162688660.162691879.162692111	0	0.623,0.477,0.341	0.974,0.927,0.981	-0.48
SE.Wdr74.1.224935706.224935849.224934287.224934412.224935968.224935983	0	0.625,0.663,0.359	0.961,1.0,1.0	-0.438
SE.Wdr74.1.224935773.224935849.224934287.224934412.224935968.224936115	0	0.862,0.88,0.686	0.988,1.0,1.0	-0.187
SE.Zfp385a.7.144941064.144941149.144939618.144940948.144941330.144941500	0	0.671,0.577,0.414	1.0,0.981,0.993	-0.437
SE.Zfp385a.7.144941064.144941189.144939618.144940948.144941330.144941500	0	0.649,0.549,0.378	1.0,0.979,0.992	-0.465
SE.Zfp385a.7.144941064.144941160.144939618.144940948.144941330.144941500	0	0.856,0.784,0.699	1.0,0.993,0.997	-0.217
SE.Ripk3.15.34471977.34472047.34471545.34471603.34472260.34472328	0	0.909,0.92,0.86	1.0,1.0,0.995	-0.102
SE.Srcap.1.198984463.198984751.198984017.198984283.198985294.198985459	0	0.871,0.829,0.656	1.0,1.0,1.0	-0.215
SE.Srcap.1.198984682.198984751.198984017.198984283.198985294.198985459	0	0.711,0.674,0.395	1.0,1.0,1.0	-0.407
SE.Srcap.1.198984577.198984751.198984017.198984283.198985294.198985463	0	0.779,0.755,0.484	1.0,1.0,1.0	-0.327
SE.Mark2.1.222535051.222535171.222534842.222534942.222535787.222536020	0	0.81,0.818,0.71	1.0,1.0,0.98	-0.214
SE.Nfic.7.11175253.11175330.11172730.11172885.11177445.11177664	0	0.873,0.883,0.783	1.0,1.0,0.995	-0.152
SE.Nfic.7.11173776.11173961.11172811.11172885.11177445.11177664	0	0.845,0.832,0.638	1.0,1.0,0.997	-0.227
SE.Nfic.7.11173776.11173961.11172811.11172885.11175253.11175330	0	0.779,0.674,0.528	0.997,0.996,0.999	-0.337
SE.Nfic.7.11173901.11173961.11172730.11172885.11177445.11177664	0	0.337,0.371,0.187	1.0,1.0,0.972	-0.692
SE.Nfic.7.11173901.11173961.11172730.11172885.11175253.11175330	0	0.539,0.411,0.272	0.991,0.987,0.997	-0.584
SE.Pik3ca.2.118857185.118857337.118856967.118857085.118857999.118861454	0	0.791,0.566,0.28	1.0,1.0,0.991	-0.451
SE.Lyst.17.90399840.90399996.90399008.90399200.90409043.90409196	0	0.211,0.2,0.335	0.0,0.0,0.0	0.249
SE.Erf.1.82115725.82115851.82112448.82115625.82116198.82116433	0	0.717,0.573,0.406	0.985,0.973,0.96	-0.407
SE.Erf.1.82115735.82115851.82112448.82115625.82116198.82116433	0	0.856,0.767,0.627	0.993,0.989,0.982	-0.238
SE.Plod2.8.100040203.100040266.100038859.100039001.100041285.100041399	0	0.867,0.856,0.7	0.953,0.96,0.96	-0.15
SE.Uckl1.3.177066994.177067073.177066785.177066908.177067188.177067435	0	0.178,0.152,0.081	1.0,1.0,1.0	-0.863
SE.Uckl1.3.177067010.177067073.177066785.177066908.177067188.177067282	0	0.536,0.468,0.319	1.0,1.0,1.0	-0.559
SE.Uckl1.3.177067010.177067058.177066785.177066908.177067188.177067282	0	0.361,0.219,0.125	1.0,1.0,1.0	-0.765
SE.Setd5.4.145053956.145054149.145050427.145050648.145054417.145054523	0	0.608,0.834,0.859	0.234,0.209,0.207	0.55
SE.Anapc4.14.60492074.60492125.60491724.60491811.60493131.60493184	0	0.155,0.152,0.367	0.0,0.0,0.002	0.224
SE.Fam168b.9.41311033.41311177.41309608.41309738.41311307.41311450	0	0.861,0.713,0.652	1.0,1.0,1.0	-0.258
SE.Fam168b.9.41311033.41311232.41309608.41309738.41311307.41311450	0	0.881,0.74,0.702	1.0,1.0,1.0	-0.226
SE.Fam168b.9.41311033.41311211.41309608.41309738.41311307.41311450	0	0.926,0.841,0.798	1.0,1.0,1.0	-0.145
SE.Fam168b.9.41311033.41311211.41309608.41309738.41321520.41321601	0	0.883,0.855,0.7	0.987,1.0,1.0	-0.183
SE.Fam168b.9.41311033.41311207.41309608.41309738.41311307.41311450	0	0.874,0.734,0.685	1.0,1.0,1.0	-0.236
SE.Axl.1.82556565.82556642.82556093.82556215.82558184.82558259	0	0.8,0.704,0.638	0.976,0.989,0.973	-0.265
SE.Axl.1.82556565.82556637.82556093.82556215.82558184.82558262	0	0.798,0.703,0.637	0.976,0.989,0.973	-0.267
SE.Axl.1.82556565.82556658.82556093.82556215.82558184.82558259	0	0.922,0.873,0.835	0.992,0.996,0.991	-0.116
SE.Axl.1.82566746.82566773.82563906.82564039.82566983.82567046	0	0.385,0.375,0.333	0.641,0.702,0.674	-0.308
SE.Axl.1.82566746.82566773.82563906.82564039.82568169.82568380	0	0.243,0.311,0.274	0.586,0.626,0.718	-0.367
SE.Tmem175.14.2088421.2088457.2087871.2087968.2088692.2088744	0	0.702,0.673,0.622	1.0,1.0,0.993	-0.332
SE.Supt5h.1.85448918.85448930.85448306.85448372.85449333.85449403	0	0.33,0.318,0.355	0.919,0.958,0.924	-0.599
SE.Gas2l1.14.85315246.85315373.85314986.85315158.85315424.85315478	0	0.823,0.921,0.761	1.0,1.0,1.0	-0.165
SE.Gas2l1.14.85315242.85315343.85314986.85315158.85315424.85315532	0	0.854,0.932,0.778	1.0,1.0,1.0	-0.145
SE.Gas2l1.14.85315246.85315315.85314986.85315158.85315424.85315478	0	0.801,0.918,0.753	1.0,1.0,1.0	-0.176
SE.Maf1.7.117419940.117420081.117419693.117419813.117420211.117420719	0	0.769,0.711,0.653	0.906,0.936,0.941	-0.217
SE.Maf1.7.117419940.117420092.117419704.117419813.117420211.117420719	0	0.663,0.592,0.541	0.853,0.897,0.907	-0.287
SE.Zdhhc7.19.52735151.52735377.52733160.52734765.52736496.52736578	0	0.652,0.687,0.432	1.0,1.0,1.0	-0.41
SE.Zdhhc7.19.52735246.52735377.52733160.52734765.52736496.52736578	0	0.871,0.876,0.704	1.0,1.0,1.0	-0.183
SE.Duoxa1.3.114242245.114242455.114241056.114241591.114242701.114242915	0	0.297,0.103,0.037	1.0,0.976,1.0	-0.846
SE.Duoxa1.3.114242245.114242460.114241056.114241591.114242701.114242915	0	0.39,0.132,0.066	1.0,0.983,1.0	-0.798
SE.Afdn.1.53765345.53765366.53764475.53764621.53767044.53767250	0	0.494,0.456,0.508	0.957,1.0,0.984	-0.494
SE.Psme2.15.34266888.34266998.34266346.34266433.34267137.34267202	0	0.745,0.709,0.538	1.0,0.991,1.0	-0.333
SE.Psme2.15.34266876.34266998.34266346.34266433.34267137.34267205	0	0.737,0.699,0.525	1.0,0.991,1.0	-0.343
SE.Nfya.9.14562019.14562106.14560503.14560643.14565480.14565627	0	0.458,0.42,0.42	0.882,0.865,0.9	-0.45
SE.Nfya.9.14562019.14562103.14560502.14560643.14565480.14565627	0	0.176,0.297,0.348	0.826,0.836,0.86	-0.567
SE.Plpp5.16.71123076.71123178.71121174.71121994.71123844.71123969	0	0.298,0.238,0.153	0.944,0.822,0.865	-0.647
SE.Plpp5.16.71123076.71123205.71121174.71121994.71123844.71123969	0	0.301,0.253,0.151	0.947,0.823,0.869	-0.645
SE.Plpp5.16.71123076.71123124.71121174.71121994.71123844.71123969	0	0.231,0.167,0.119	0.93,0.741,0.809	-0.654
SE.Plpp5.16.71123076.71123247.71121174.71121994.71123844.71123969	0	0.39,0.363,0.248	0.968,0.895,0.929	-0.597
SE.RGD1565536.3.110554785.110554938.110554574.110554703.110555419.110555527	0	0.754,0.764,0.517	0.977,1.0,1.0	-0.314
SE.Prickle3.X.15684045.15684345.15682652.15683497.15685302.15685489	0	0.577,0.35,0.19	0.936,0.981,1.0	-0.6
SE.Brd8.18.27407018.27407228.27406381.27406662.27408355.27408500	0	0.522,0.538,0.387	0.991,1.0,0.95	-0.498
SE.Kifc3.19.10338331.10338358.10337500.10337609.10338542.10339178	0	0.859,0.799,0.697	0.996,0.983,0.988	-0.204
[truncated: 4,284 more rows]
