# Supplementary material for: Identification of RBPMS as a mammalian smooth muscle master splicing regulator via proximity of its gene with super-enhancers
Source: eLife. 2019 Jul 8;8:e46327. doi: 10.7554/eLife.46327 (PMC6613909; doi:10.7554/eLife.46327)
Supplement: Supplementary file 4. [file elife-46327-supp4.xlsx]

## Sheet: Summary
GO terms significantly enriched in genes differentially spliced (FDR < 0.05 and DeltaPsi > 10%)
GO term, description, p-value, FDR q-value, enrichment, total number of genes (N), genes associated with a particular GO term (B), number of genes in the target set (n), number of genes from n found in a particular GO term (b), gene names, GO term category (biological process, BP, molecular function, MF, and cellular component, CC). GO analysis was carried out using Gorilla as described in Method…
Samples
T	Rat aorta tissue
P9	Rat aorta Passage 9
D Ctr	Control Differentiated PAC1
D KD	RBPMS KD in Differentiated PAC1
P Ctr	Control Proliferative PAC1 (minus Dox)
P OE	RBPMSA overexpression Proliferative PAC1 (plus Dox)
Comparisons
(T - P9)	Rat aorta dedifferentiation
(D Ctr - P Ctr)	PAC1 dedifferentiation
(D KD - D Ctr)	RBPMS knockdown in PAC1 cells
(P OE - P Ctr)	RBPMS overexpression in PAC1 cells

## Sheet: T - P9
GO.Term	Description	P.value	FDR.q.value	Enrichment	N	B	n	b	Genes	Category
GO:0099572	postsynaptic specialization	6.97e-05	0.124	2.11	8836	192	654	30	[Ptk2b - protein tyrosine kinase 2 beta, Dmd - dystrophin, Pja2 - praja ring finger 2, e3 ubiquitin protein ligase, Plcb4 - phospholipase c, beta 4, Myo6 - myosin vi, Pkp4 - plakophilin 4, Camk2g - calcium/calmodulin-dependent protein kinase ii gamma, Dlg3 - discs, large homolog 3 (drosophila), Mtmr2 - myotubularin related protein 2, Dlg1 - discs, large homolog 1 (drosophila), Fyn - fyn oncogene …	CC
GO:0043198	dendritic shaft	0.000118	0.105	3.97	8836	34	654	10	[Zmynd8 - zinc finger, mynd-type containing 8, Arhgef2 - rho/rac guanine nucleotide exchange factor (gef) 2, Gabbr1 - gamma-aminobutyric acid (gaba) b receptor 1, Dlg3 - discs, large homolog 3 (drosophila), Kirrel - kin of irre like (drosophila), Cacna1c - calcium channel, voltage-dependent, l type, alpha 1c subunit, Gipc1 - gipc pdz domain containing family, member 1, Slc8a1 - solute carrier fam…	CC
GO:0014069	postsynaptic density	0.000154	0.0915	2.05	8836	191	654	29	[Ptk2b - protein tyrosine kinase 2 beta, Dmd - dystrophin, Pja2 - praja ring finger 2, e3 ubiquitin protein ligase, Plcb4 - phospholipase c, beta 4, Myo6 - myosin vi, Pkp4 - plakophilin 4, Camk2g - calcium/calmodulin-dependent protein kinase ii gamma, Dlg3 - discs, large homolog 3 (drosophila), Mtmr2 - myotubularin related protein 2, Dlg1 - discs, large homolog 1 (drosophila), Fyn - fyn oncogene …	CC
GO:0001726	ruffle	0.000228	0.101	2.91	8836	65	654	14	[Actn1 - actinin, alpha 1, Lima1 - lim domain and actin binding 1, Myo9b - myosin ixb, Cd2ap - cd2-associated protein, Myo6 - myosin vi, Nf2 - neurofibromin 2 (merlin), Arhgef7 - rho guanine nucleotide exchange factor (gef) 7, Tnfrsf12a - tumor necrosis factor receptor superfamily, member 12a, Cobl - cordon-bleu wh2 repeat protein, Myo5a - myosin va, Arhgap1 - rho gtpase activating protein 1, Gsn…	CC
GO:0030054	cell junction	0.000231	0.0825	1.58	8836	503	654	59	[Ptk2b - protein tyrosine kinase 2 beta, Sorbs1 - sorbin and sh3 domain containing 1, Actn1 - actinin, alpha 1, Lima1 - lim domain and actin binding 1, Pkp4 - plakophilin 4, Sptan1 - spectrin, alpha, non-erythrocytic 1, Nexn - nexilin (f actin binding protein), Smc5 - structural maintenance of chromosomes 5, Tns1 - tensin 1, Tmem65 - transmembrane protein 65, Gabbr1 - gamma-aminobutyric acid (gab…	CC
GO:0030018	Z disc	0.000279	0.083	2.74	8836	74	654	15	[Dmd - dystrophin, Ppp1r12a - protein phosphatase 1, regulatory subunit 12a, Actn1 - actinin, alpha 1, Ank2 - ankyrin 2, neuronal, Atp2b4 - atpase, ca++ transporting, plasma membrane 4, Sptan1 - spectrin, alpha, non-erythrocytic 1, Flna - filamin a, alpha, Nexn - nexilin (f actin binding protein), Sync - syncoilin, intermediate filament protein, Flnc - filamin c, gamma, Actn4 - actinin alpha 4, C…	CC
GO:0005903	brush border	0.000325	0.0827	3.56	8836	38	654	10	[Myl6 - myosin, light chain 6, alkali, smooth muscle and non-muscle, Actn1 - actinin, alpha 1, Actn4 - actinin alpha 4, Lima1 - lim domain and actin binding 1, Flnb - filamin b, beta, Gipc1 - gipc pdz domain containing family, member 1, Myo6 - myosin vi, Myh11 - myosin, heavy chain 11, smooth muscle, Snx5 - sorting nexin 5, Flna - filamin a, alpha]	CC
GO:0098862	cluster of actin-based cell projections	0.000408	0.091	3.46	8836	39	654	10	[Myl6 - myosin, light chain 6, alkali, smooth muscle and non-muscle, Actn1 - actinin, alpha 1, Actn4 - actinin alpha 4, Lima1 - lim domain and actin binding 1, Flnb - filamin b, beta, Myo6 - myosin vi, Gipc1 - gipc pdz domain containing family, member 1, Myh11 - myosin, heavy chain 11, smooth muscle, Snx5 - sorting nexin 5, Flna - filamin a, alpha]	CC
GO:0042641	actomyosin	0.000557	0.11	2.95	8836	55	654	12	[Tpm1 - tropomyosin 1, alpha, Myo5a - myosin va, Sorbs1 - sorbin and sh3 domain containing 1, Actn1 - actinin, alpha 1, Pxn - paxillin, Actn4 - actinin alpha 4, Lima1 - lim domain and actin binding 1, Flnb - filamin b, beta, Myh11 - myosin, heavy chain 11, smooth muscle, Fermt2 - fermitin family member 2, Pdlim7 - pdz and lim domain 7, Cdc42bpa - cdc42 binding protein kinase alpha]	CC
GO:0044430	cytoskeletal part	0.00057	0.102	1.39	8836	896	654	92	[Eml4 - echinoderm microtubule associated protein like 4, Sorbs1 - sorbin and sh3 domain containing 1, Ppp1r12a - protein phosphatase 1, regulatory subunit 12a, Lrpprc - leucine-rich pentatricopeptide repeat containing, Cep164 - centrosomal protein 164, Actn1 - actinin, alpha 1, Lima1 - lim domain and actin binding 1, Pkp4 - plakophilin 4, Cluap1 - clusterin associated protein 1, Sptan1 - spectri…	CC
GO:0098919	structural constituent of postsynaptic density	0.000404	1	13.51	8836	3	654	3	[Dlg3 - discs, large homolog 3 (drosophila), Dlg4 - discs, large homolog 4 (drosophila), Dlg1 - discs, large homolog 1 (drosophila)]	MF
GO:0008092	cytoskeletal protein binding	0.0005	0.918	1.53	8836	540	654	61	[Eml4 - echinoderm microtubule associated protein like 4, Lrpprc - leucine-rich pentatricopeptide repeat containing, Actn1 - actinin, alpha 1, Lima1 - lim domain and actin binding 1, Svil - supervillin, Gipc1 - gipc pdz domain containing family, member 1, Sptan1 - spectrin, alpha, non-erythrocytic 1, Golga2 - golgin a2, Nexn - nexilin (f actin binding protein), Dyrk1a - dual-specificity tyrosine-…	MF
GO:0010881	regulation of cardiac muscle contraction by regulation of the release of sequestered calcium ion	0.000101	1	8.44	8836	8	654	5	[Dmd - dystrophin, Camk2d - calcium/calmodulin-dependent protein kinase ii delta, Ank2 - ankyrin 2, neuronal, Cacna1c - calcium channel, voltage-dependent, l type, alpha 1c subunit, Slc8a1 - solute carrier family 8 (sodium/calcium exchanger), member 1]	BP
GO:0042391	regulation of membrane potential	0.000253	1	2.02	8836	187	654	28	[Ptk2b - protein tyrosine kinase 2 beta, Dmd - dystrophin, Camk2d - calcium/calmodulin-dependent protein kinase ii delta, Mgea5 - meningioma expressed antigen 5 (hyaluronidase), Dmpk - dystrophia myotonica-protein kinase, Ppid - peptidylprolyl isomerase d, Slc25a36 - solute carrier family 25 (pyrimidine nucleotide carrier ), member 36, Akap7 - a kinase (prka) anchor protein 7, Zmynd8 - zinc finge…	BP
GO:0051282	regulation of sequestering of calcium ion	0.000299	1	2.98	8836	59	654	13	[Ptk2b - protein tyrosine kinase 2 beta, Clic2 - chloride intracellular channel 2, Dmd - dystrophin, Camk2d - calcium/calmodulin-dependent protein kinase ii delta, Ank2 - ankyrin 2, neuronal, Itpr1 - inositol 1,4,5-trisphosphate receptor, type 1, Myo5a - myosin va, Prkd1 - protein kinase d1, Htt - huntingtin, Cacna1c - calcium channel, voltage-dependent, l type, alpha 1c subunit, Tpcn2 - two pore…	BP
GO:0098901	regulation of cardiac muscle cell action potential	0.000389	1	4.73	8836	20	654	7	[Slmap - sarcolemma associated protein, Dlg1 - discs, large homolog 1 (drosophila), Ank2 - ankyrin 2, neuronal, Camk2d - calcium/calmodulin-dependent protein kinase ii delta, Cacna1c - calcium channel, voltage-dependent, l type, alpha 1c subunit, Flna - filamin a, alpha, Akap9 - a kinase (prka) anchor protein (yotiao) 9]	BP
GO:1902414	protein localization to cell junction	0.000403	1	6.76	8836	10	654	5	[Heg1 - heart development protein with egf-like domains 1, Actn4 - actinin alpha 4, Dlg5 - discs, large homolog 5 (drosophila), Flna - filamin a, alpha, Scrib - scribbled planar cell polarity protein]	BP
GO:0034330	cell junction organization	0.000497	1	2.36	8836	103	654	18	[Rab8b - rab8b, member ras oncogene family, Ptk2b - protein tyrosine kinase 2 beta, Heg1 - heart development protein with egf-like domains 1, Sorbs1 - sorbin and sh3 domain containing 1, Actn1 - actinin, alpha 1, Ank2 - ankyrin 2, neuronal, Dlg5 - discs, large homolog 5 (drosophila), Pkp4 - plakophilin 4, Nf2 - neurofibromin 2 (merlin), Flna - filamin a, alpha, Ctnnd1 - catenin (cadherin associat…	BP
GO:0032412	regulation of ion transmembrane transporter activity	0.000526	1	2.23	8836	121	654	20	[Clic2 - chloride intracellular channel 2, Ptk2b - protein tyrosine kinase 2 beta, Dmd - dystrophin, Ank2 - ankyrin 2, neuronal, Camk2d - calcium/calmodulin-dependent protein kinase ii delta, Wnk1 - wnk lysine deficient protein kinase 1, Atp7a - atpase, cu++ transporting, alpha polypeptide, Wwp2 - ww domain containing e3 ubiquitin protein ligase 2, Ubqln1 - ubiquilin 1, Akap7 - a kinase (prka) an…	BP
GO:0034329	cell junction assembly	0.000671	1	2.53	8836	80	654	15	[Ptk2b - protein tyrosine kinase 2 beta, Heg1 - heart development protein with egf-like domains 1, Sorbs1 - sorbin and sh3 domain containing 1, Actn1 - actinin, alpha 1, Ank2 - ankyrin 2, neuronal, Dlg5 - discs, large homolog 5 (drosophila), Pkp4 - plakophilin 4, Ctnnd1 - catenin (cadherin associated protein), delta 1, Tns1 - tensin 1, Dlg1 - discs, large homolog 1 (drosophila), Actn4 - actinin a…	BP
GO:2000479	regulation of cAMP-dependent protein kinase activity	0.000694	1	6.14	8836	11	654	5	[Pkig - protein kinase inhibitor, gamma, Htt - huntingtin, Atp2b4 - atpase, ca++ transporting, plasma membrane 4, Rapgef2 - rap guanine nucleotide exchange factor (gef) 2, Sirt1 - sirtuin 1]	BP
GO:0010882	regulation of cardiac muscle contraction by calcium ion signaling	0.000694	0.93	6.14	8836	11	654	5	[Dmd - dystrophin, Ank2 - ankyrin 2, neuronal, Camk2d - calcium/calmodulin-dependent protein kinase ii delta, Cacna1c - calcium channel, voltage-dependent, l type, alpha 1c subunit, Slc8a1 - solute carrier family 8 (sodium/calcium exchanger), member 1]	BP
GO:0018193	peptidyl-amino acid modification	0.000707	0.861	1.53	8836	503	654	57	[Ptk2b - protein tyrosine kinase 2 beta, Fkbp7 - fk506 binding protein 7, Zdhhc4 - zinc finger, dhhc-type containing 4, Mgea5 - meningioma expressed antigen 5 (hyaluronidase), Ehmt2 - euchromatic histone lysine n-methyltransferase 2, Atf2 - activating transcription factor 2, Ppid - peptidylprolyl isomerase d, Dmpk - dystrophia myotonica-protein kinase, Parp2 - poly (adp-ribose) polymerase 2, Clk1…	BP
GO:0022898	regulation of transmembrane transporter activity	0.000894	0.998	2.14	8836	126	654	20	[Clic2 - chloride intracellular channel 2, Ptk2b - protein tyrosine kinase 2 beta, Dmd - dystrophin, Ank2 - ankyrin 2, neuronal, Camk2d - calcium/calmodulin-dependent protein kinase ii delta, Wnk1 - wnk lysine deficient protein kinase 1, Atp7a - atpase, cu++ transporting, alpha polypeptide, Wwp2 - ww domain containing e3 ubiquitin protein ligase 2, Ubqln1 - ubiquilin 1, Akap7 - a kinase (prka) an…	BP
GO:1904062	regulation of cation transmembrane transport	0.000911	0.939	2.02	8836	154	654	23	[Clic2 - chloride intracellular channel 2, Ptk2b - protein tyrosine kinase 2 beta, Dmd - dystrophin, Ank2 - ankyrin 2, neuronal, Camk2d - calcium/calmodulin-dependent protein kinase ii delta, Wnk1 - wnk lysine deficient protein kinase 1, Atp7a - atpase, cu++ transporting, alpha polypeptide, Wwp2 - ww domain containing e3 ubiquitin protein ligase 2, Ubqln1 - ubiquilin 1, Flna - filamin a, alpha, A…	BP
GO:0002064	epithelial cell development	0.000916	0.877	2.56	8836	74	654	14	[Dmd - dystrophin, Heg1 - heart development protein with egf-like domains 1, Slc4a7 - solute carrier family 4, sodium bicarbonate cotransporter, member 7, Fgfr1 - fibroblast growth factor receptor 1, Adamtsl4 - adamts-like 4, Rarg - retinoic acid receptor, gamma, Flna - filamin a, alpha, Rapgef2 - rap guanine nucleotide exchange factor (gef) 2, Fasn - fatty acid synthase, Sidt2 - sid1 transmembra…	BP
GO:0051128	regulation of cellular component organization	0.000962	0.86	1.26	8836	1550	654	145	[Eml4 - echinoderm microtubule associated protein like 4, Lgals1 - lectin, galactoside-binding, soluble, 1, Mgea5 - meningioma expressed antigen 5 (hyaluronidase), Ehmt2 - euchromatic histone lysine n-methyltransferase 2, Dmpk - dystrophia myotonica-protein kinase, Anxa1 - annexin a1, Eln - elastin, Golga2 - golgin a2, Setdb1 - set domain, bifurcated 1, Zmynd8 - zinc finger, mynd-type containing …	BP

## Sheet: D Ctr - P Ctr
GO.Term	Description	P.value	FDR.q.value	Enrichment	N	B	n	b	Genes	Category
GO:0042641	actomyosin	4.13e-05	0.0757	5.32	10148	59	291	9	[Tpm1 - tropomyosin 1, alpha, Myo5a - myosin va, Sorbs1 - sorbin and sh3 domain containing 1, Mprip - myosin phosphatase rho interacting protein, Actn1 - actinin, alpha 1, Flnb - filamin b, beta, Pdlim7 - pdz and lim domain 7, Cdc42bpa - cdc42 binding protein kinase alpha, Dctn4 - dynactin 4 (p62)]	CC
GO:0030054	cell junction	0.000108	0.0985	2	10148	576	291	33	[Itga7 - integrin, alpha 7, Tjap1 - tight junction associated protein 1, Mink1 - misshapen-like kinase 1, Sorbs1 - sorbin and sh3 domain containing 1, Actn1 - actinin, alpha 1, Stxbp5 - syntaxin binding protein 5 (tomosyn), Lmo7 - lim domain 7, Stx2 - syntaxin 2, Nexn - nexilin (f actin binding protein), Ybx3 - y box binding protein 3, Arhgap17 - rho gtpase activating protein 17, Arhgap44 - rho g…	CC
GO:0001725	stress fiber	0.000656	0.401	4.69	10148	52	291	7	[Tpm1 - tropomyosin 1, alpha, Sorbs1 - sorbin and sh3 domain containing 1, Mprip - myosin phosphatase rho interacting protein, Actn1 - actinin, alpha 1, Flnb - filamin b, beta, Pdlim7 - pdz and lim domain 7, Dctn4 - dynactin 4 (p62)]	CC
GO:0097517	contractile actin filament bundle	0.000656	0.3	4.69	10148	52	291	7	[Tpm1 - tropomyosin 1, alpha, Sorbs1 - sorbin and sh3 domain containing 1, Mprip - myosin phosphatase rho interacting protein, Actn1 - actinin, alpha 1, Flnb - filamin b, beta, Pdlim7 - pdz and lim domain 7, Dctn4 - dynactin 4 (p62)]	CC
GO:0060589	nucleoside-triphosphatase regulator activity	0.000215	0.821	2.78	10148	201	291	16	[Slit2 - slit homolog 2 (drosophila), Stxbp5 - syntaxin binding protein 5 (tomosyn), Myo9b - myosin ixb, Arhgef10l - rho guanine nucleotide exchange factor (gef) 10-like, Evi5l - ecotropic viral integration site 5-like, Arrb1 - arrestin, beta 1, Ect2 - epithelial cell transforming sequence 2 oncogene, Tbc1d1 - tbc1 (tre-2/usp6, bub2, cdc16) domain family, member 1, Cdc42ep2 - cdc42 effector prote…	MF
GO:0030695	GTPase regulator activity	0.000293	0.561	2.94	10148	166	291	14	[Slit2 - slit homolog 2 (drosophila), Stxbp5 - syntaxin binding protein 5 (tomosyn), Myo9b - myosin ixb, Arhgef10l - rho guanine nucleotide exchange factor (gef) 10-like, Evi5l - ecotropic viral integration site 5-like, Arrb1 - arrestin, beta 1, Ect2 - epithelial cell transforming sequence 2 oncogene, Tbc1d1 - tbc1 (tre-2/usp6, bub2, cdc16) domain family, member 1, Cdc42ep2 - cdc42 effector prote…	MF
GO:0097718	disordered domain specific binding	0.000304	0.388	6.34	10148	33	291	6	[Tpm1 - tropomyosin 1, alpha, Numa1 - nuclear mitotic apparatus protein 1, Myo5a - myosin va, Mdm2 - p53 e3 ubiquitin protein ligase, Fn1 - fibronectin 1, Ap2m1 - adaptor-related protein complex 2, mu 1 subunit]	MF
GO:0005096	GTPase activator activity	0.00042	0.401	2.98	10148	152	291	13	[Stxbp5 - syntaxin binding protein 5 (tomosyn), Myo9b - myosin ixb, Arhgef10l - rho guanine nucleotide exchange factor (gef) 10-like, Arrb1 - arrestin, beta 1, Ect2 - epithelial cell transforming sequence 2 oncogene, Evi5l - ecotropic viral integration site 5-like, Tbc1d1 - tbc1 (tre-2/usp6, bub2, cdc16) domain family, member 1, Cdc42ep2 - cdc42 effector protein (rho gtpase binding) 2, Arhgap17 -…	MF
GO:0017048	Rho GTPase binding	0.000693	0.53	3.17	10148	121	291	11	[Arhgap17 - rho gtpase activating protein 17, Cdc42ep2 - cdc42 effector protein (rho gtpase binding) 2, Arhgef2 - rho/rac guanine nucleotide exchange factor (gef) 2, Arhgap44 - rho gtpase activating protein 44, Myo9b - myosin ixb, Fmnl3 - formin-like 3, Arhgef10l - rho guanine nucleotide exchange factor (gef) 10-like, Ect2 - epithelial cell transforming sequence 2 oncogene, Whamm - was protein ho…	MF
GO:0030029	actin filament-based process	4.13e-05	0.573	2.75	10148	254	291	20	[Tpm1 - tropomyosin 1, alpha, Mink1 - misshapen-like kinase 1, Sorbs1 - sorbin and sh3 domain containing 1, Taok2 - tao kinase 2, Actn1 - actinin, alpha 1, Myo9b - myosin ixb, Fmnl3 - formin-like 3, Arhgef10l - rho guanine nucleotide exchange factor (gef) 10-like, Arrb1 - arrestin, beta 1, Anxa1 - annexin a1, Cdc42ep2 - cdc42 effector protein (rho gtpase binding) 2, Epb41l2 - erythrocyte membrane…	BP
GO:0030036	actin cytoskeleton organization	0.000128	0.888	2.69	10148	233	291	18	[Tpm1 - tropomyosin 1, alpha, Mink1 - misshapen-like kinase 1, Sorbs1 - sorbin and sh3 domain containing 1, Taok2 - tao kinase 2, Actn1 - actinin, alpha 1, Fmnl3 - formin-like 3, Arhgef10l - rho guanine nucleotide exchange factor (gef) 10-like, Arrb1 - arrestin, beta 1, Anxa1 - annexin a1, Cdc42ep2 - cdc42 effector protein (rho gtpase binding) 2, Epb41l2 - erythrocyte membrane protein band 4.1-li…	BP
GO:0007010	cytoskeleton organization	0.000275	1	1.95	10148	555	291	31	[Taok2 - tao kinase 2, Mink1 - misshapen-like kinase 1, Sorbs1 - sorbin and sh3 domain containing 1, Actn1 - actinin, alpha 1, Fmnl3 - formin-like 3, Arhgef10l - rho guanine nucleotide exchange factor (gef) 10-like, Svil - supervillin, Arrb1 - arrestin, beta 1, Anxa1 - annexin a1, Pde4dip - phosphodiesterase 4d interacting protein, Cdc42ep2 - cdc42 effector protein (rho gtpase binding) 2, Nsfl1c …	BP
GO:0032989	cellular component morphogenesis	0.000336	1	2.3	10148	319	291	21	[Jmjd1c - jumonji domain containing 1c, Fryl - fry-like, Slit2 - slit homolog 2 (drosophila), Mink1 - misshapen-like kinase 1, Taok2 - tao kinase 2, Actn1 - actinin, alpha 1, Myo9b - myosin ixb, Kidins220 - kinase d-interacting substrate 220, Ect2 - epithelial cell transforming sequence 2 oncogene, Picalm - phosphatidylinositol binding clathrin assembly protein, Fat1 - fat atypical cadherin 1, Sc…	BP
GO:0043087	regulation of GTPase activity	0.000423	1	2.37	10148	279	291	19	[Slit2 - slit homolog 2 (drosophila), Myo9b - myosin ixb, Stxbp5 - syntaxin binding protein 5 (tomosyn), Evi5l - ecotropic viral integration site 5-like, Ect2 - epithelial cell transforming sequence 2 oncogene, Arrb1 - arrestin, beta 1, Picalm - phosphatidylinositol binding clathrin assembly protein, Tbc1d1 - tbc1 (tre-2/usp6, bub2, cdc16) domain family, member 1, Scrib - scribbled planar cell po…	BP
GO:0016043	cellular component organization	0.000454	1	1.3	10148	3145	291	117	[Kansl3 - kat8 regulatory nsl complex subunit 3, Sorbs1 - sorbin and sh3 domain containing 1, Uspl1 - ubiquitin specific peptidase like 1, Kctd9 - potassium channel tetramerization domain containing 9, Scube3 - signal peptide, cub domain, egf-like 3, Arrb1 - arrestin, beta 1, Chtf8 - ctf8, chromosome transmission fidelity factor 8 homolog (s. cerevisiae), Anxa1 - annexin a1, Cdc42ep2 - cdc42 effe…	BP
GO:0071840	cellular component organization or biogenesis	0.000501	0.994	1.29	10148	3185	291	118	[Kansl3 - kat8 regulatory nsl complex subunit 3, Sorbs1 - sorbin and sh3 domain containing 1, Uspl1 - ubiquitin specific peptidase like 1, Kctd9 - potassium channel tetramerization domain containing 9, Scube3 - signal peptide, cub domain, egf-like 3, Arrb1 - arrestin, beta 1, Chtf8 - ctf8, chromosome transmission fidelity factor 8 homolog (s. cerevisiae), Anxa1 - annexin a1, Cdc42ep2 - cdc42 effe…	BP
GO:0098877	neurotransmitter receptor transport to plasma membrane	0.00075	1	14.95	10148	7	291	3	[Arhgap44 - rho gtpase activating protein 44, Clstn1 - calsyntenin 1, Scrib - scribbled planar cell polarity protein]	BP
GO:0098969	neurotransmitter receptor transport to postsynaptic membrane	0.00075	1	14.95	10148	7	291	3	[Arhgap44 - rho gtpase activating protein 44, Scrib - scribbled planar cell polarity protein, Clstn1 - calsyntenin 1]	BP
GO:0043547	positive regulation of GTPase activity	0.000909	1	2.44	10148	229	291	16	[Stxbp5 - syntaxin binding protein 5 (tomosyn), Myo9b - myosin ixb, Evi5l - ecotropic viral integration site 5-like, Arrb1 - arrestin, beta 1, Ect2 - epithelial cell transforming sequence 2 oncogene, Picalm - phosphatidylinositol binding clathrin assembly protein, Tbc1d1 - tbc1 (tre-2/usp6, bub2, cdc16) domain family, member 1, Scrib - scribbled planar cell polarity protein, Cdc42ep2 - cdc42 effe…	BP
GO:1990126	retrograde transport, endosome to plasma membrane	0.000918	1	8.72	10148	16	291	4	[Arhgap44 - rho gtpase activating protein 44, Vps39 - vacuolar protein sorting 39 homolog (s. cerevisiae), Sdccag3 - serologically defined colon cancer antigen 3, Scrib - scribbled planar cell polarity protein]	BP

## Sheet: D KD - D Ctr
GO.Term	Description	P.value	FDR.q.value	Enrichment	N	B	n	b	Genes	Category
GO:0005856	cytoskeleton	6.38e-07	0.00116	3.1	9998	530	146	24	[SPATA7 - spermatogenesis associated 7, LDB3 - lim domain binding 3, MYO9B - myosin ixb, PDLIM5 - pdz and lim domain 5, ABI1 - abl-interactor 1, LRRFIP1 - leucine rich repeat (in flii) interacting protein 1, MPRIP - myosin phosphatase rho interacting protein, PDLIM7 - pdz and lim domain 7 (enigma), OSBPL10 - oxysterol binding protein-like 10, MAST2 - microtubule associated serine/threonine kinase…	CC
GO:0042995	cell projection	3.49e-06	0.00318	2.39	9998	888	146	31	[PKD1 - polycystic kidney disease 1 (autosomal dominant), PDLIM5 - pdz and lim domain 5, ACTN1 - actinin, alpha 1, ABI1 - abl-interactor 1, SLC9A1 - solute carrier family 9, subfamily a (nhe1, cation proton antiporter 1), member 1, DAAM1 - dishevelled associated activator of morphogenesis 1, LRRC16A - leucine rich repeat containing 16a, CAMK2G - calcium/calmodulin-dependent protein kinase ii gamm…	CC
GO:0030054	cell junction	8.81e-06	0.00535	2.42	9998	791	146	28	[CD99 - cd99 molecule, PDLIM5 - pdz and lim domain 5, ACTN1 - actinin, alpha 1, ABI1 - abl-interactor 1, MPRIP - myosin phosphatase rho interacting protein, SLC9A1 - solute carrier family 9, subfamily a (nhe1, cation proton antiporter 1), member 1, FLNA - filamin a, alpha, FLNB - filamin b, beta, PPFIA1 - protein tyrosine phosphatase, receptor type, f polypeptide (ptprf), interacting protein (lip…	CC
GO:0120025	plasma membrane bounded cell projection	1.02e-05	0.00467	2.36	9998	843	146	29	[PKD1 - polycystic kidney disease 1 (autosomal dominant), PDLIM5 - pdz and lim domain 5, ACTN1 - actinin, alpha 1, ABI1 - abl-interactor 1, SLC9A1 - solute carrier family 9, subfamily a (nhe1, cation proton antiporter 1), member 1, DAAM1 - dishevelled associated activator of morphogenesis 1, LRRC16A - leucine rich repeat containing 16a, CAMK2G - calcium/calmodulin-dependent protein kinase ii gamm…	CC
GO:0005911	cell-cell junction	2.68e-05	0.00978	3.67	9998	261	146	14	[ACTN1 - actinin, alpha 1, PDLIM5 - pdz and lim domain 5, ARHGAP17 - rho gtpase activating protein 17, CDC42BPA - cdc42 binding protein kinase alpha (dmpk-like), PDLIM7 - pdz and lim domain 7 (enigma), SLC9A1 - solute carrier family 9, subfamily a (nhe1, cation proton antiporter 1), member 1, SORBS1 - sorbin and sh3 domain containing 1, PARD3 - par-3 partitioning defective 3 homolog (c. elegans),…	CC
GO:0098590	plasma membrane region	3e-05	0.00912	2.69	9998	534	146	21	[PKD1 - polycystic kidney disease 1 (autosomal dominant), PDLIM5 - pdz and lim domain 5, ABI1 - abl-interactor 1, FN1 - fibronectin 1, DNM2 - dynamin 2, SLC9A1 - solute carrier family 9, subfamily a (nhe1, cation proton antiporter 1), member 1, PARD3 - par-3 partitioning defective 3 homolog (c. elegans), SYNE2 - spectrin repeat containing, nuclear envelope 2, DNM1 - dynamin 1, CLSTN1 - calsynteni…	CC
GO:0030027	lamellipodium	3.05e-05	0.00796	5	9998	137	146	10	[ARHGEF6 - rac/cdc42 guanine nucleotide exchange factor (gef) 6, CDC42BPA - cdc42 binding protein kinase alpha (dmpk-like), ABI1 - abl-interactor 1, ITGB1BP1 - integrin beta 1 binding protein 1, DNM2 - dynamin 2, APP - amyloid beta (a4) precursor protein, NF2 - neurofibromin 2 (merlin), SLC9A1 - solute carrier family 9, subfamily a (nhe1, cation proton antiporter 1), member 1, LRRC16A - leucine r…	CC
GO:0005912	adherens junction	6.28e-05	0.0143	2.83	9998	436	146	18	[ACTN1 - actinin, alpha 1, CD99 - cd99 molecule, PDLIM5 - pdz and lim domain 5, MPRIP - myosin phosphatase rho interacting protein, DNM2 - dynamin 2, PDLIM7 - pdz and lim domain 7 (enigma), SLC9A1 - solute carrier family 9, subfamily a (nhe1, cation proton antiporter 1), member 1, SORBS1 - sorbin and sh3 domain containing 1, PARD3 - par-3 partitioning defective 3 homolog (c. elegans), SYNE2 - spe…	CC
GO:0070161	anchoring junction	7.27e-05	0.0147	2.8	9998	441	146	18	[ACTN1 - actinin, alpha 1, CD99 - cd99 molecule, PDLIM5 - pdz and lim domain 5, MPRIP - myosin phosphatase rho interacting protein, DNM2 - dynamin 2, PDLIM7 - pdz and lim domain 7 (enigma), SLC9A1 - solute carrier family 9, subfamily a (nhe1, cation proton antiporter 1), member 1, SORBS1 - sorbin and sh3 domain containing 1, PARD3 - par-3 partitioning defective 3 homolog (c. elegans), SYNE2 - spe…	CC
GO:0042641	actomyosin	7.29e-05	0.0133	8.39	9998	49	146	6	[ACTN1 - actinin, alpha 1, CDC42BPA - cdc42 binding protein kinase alpha (dmpk-like), FLNB - filamin b, beta, PDLIM7 - pdz and lim domain 7 (enigma), DAAM1 - dishevelled associated activator of morphogenesis 1, SORBS1 - sorbin and sh3 domain containing 1]	CC
GO:0005925	focal adhesion	0.000207	0.0343	2.89	9998	355	146	15	[ACTN1 - actinin, alpha 1, CD99 - cd99 molecule, MPRIP - myosin phosphatase rho interacting protein, DNM2 - dynamin 2, SLC9A1 - solute carrier family 9, subfamily a (nhe1, cation proton antiporter 1), member 1, PDLIM7 - pdz and lim domain 7 (enigma), SORBS1 - sorbin and sh3 domain containing 1, SYNE2 - spectrin repeat containing, nuclear envelope 2, FLNA - filamin a, alpha, FLNB - filamin b, beta…	CC
GO:0005924	cell-substrate adherens junction	0.000213	0.0324	2.89	9998	356	146	15	[ACTN1 - actinin, alpha 1, CD99 - cd99 molecule, MPRIP - myosin phosphatase rho interacting protein, DNM2 - dynamin 2, SLC9A1 - solute carrier family 9, subfamily a (nhe1, cation proton antiporter 1), member 1, PDLIM7 - pdz and lim domain 7 (enigma), SORBS1 - sorbin and sh3 domain containing 1, SYNE2 - spectrin repeat containing, nuclear envelope 2, FLNA - filamin a, alpha, FLNB - filamin b, beta…	CC
GO:0030055	cell-substrate junction	0.000234	0.0328	2.86	9998	359	146	15	[ACTN1 - actinin, alpha 1, CD99 - cd99 molecule, MPRIP - myosin phosphatase rho interacting protein, DNM2 - dynamin 2, SLC9A1 - solute carrier family 9, subfamily a (nhe1, cation proton antiporter 1), member 1, PDLIM7 - pdz and lim domain 7 (enigma), SORBS1 - sorbin and sh3 domain containing 1, SYNE2 - spectrin repeat containing, nuclear envelope 2, FLNA - filamin a, alpha, FLNB - filamin b, beta…	CC
GO:0001725	stress fiber	0.00027	0.0352	8.56	9998	40	146	5	[ACTN1 - actinin, alpha 1, FLNB - filamin b, beta, PDLIM7 - pdz and lim domain 7 (enigma), DAAM1 - dishevelled associated activator of morphogenesis 1, SORBS1 - sorbin and sh3 domain containing 1]	CC
GO:0097517	contractile actin filament bundle	0.00027	0.0329	8.56	9998	40	146	5	[ACTN1 - actinin, alpha 1, FLNB - filamin b, beta, PDLIM7 - pdz and lim domain 7 (enigma), DAAM1 - dishevelled associated activator of morphogenesis 1, SORBS1 - sorbin and sh3 domain containing 1]	CC
GO:0032432	actin filament bundle	0.000382	0.0435	7.96	9998	43	146	5	[ACTN1 - actinin, alpha 1, FLNB - filamin b, beta, PDLIM7 - pdz and lim domain 7 (enigma), DAAM1 - dishevelled associated activator of morphogenesis 1, SORBS1 - sorbin and sh3 domain containing 1]	CC
GO:0015629	actin cytoskeleton	0.000477	0.0512	3.93	9998	157	146	9	[MYO9B - myosin ixb, PDLIM5 - pdz and lim domain 5, FLNA - filamin a, alpha, FLNB - filamin b, beta, MPRIP - myosin phosphatase rho interacting protein, SVIL - supervillin, PDLIM7 - pdz and lim domain 7 (enigma), MACF1 - microtubule-actin crosslinking factor 1, SMTN - smoothelin]	CC
GO:0044430	cytoskeletal part	0.000519	0.0526	1.89	9998	1050	146	29	[ACTN1 - actinin, alpha 1, DAAM1 - dishevelled associated activator of morphogenesis 1, LRRC16A - leucine rich repeat containing 16a, FLNA - filamin a, alpha, ITGB1BP1 - integrin beta 1 binding protein 1, FLNB - filamin b, beta, NF2 - neurofibromin 2 (merlin), SVIL - supervillin, MACF1 - microtubule-actin crosslinking factor 1, CEP120 - centrosomal protein 120kda, SPATA7 - spermatogenesis associa…	CC
GO:0098844	postsynaptic endocytic zone membrane	0.000629	0.0604	45.65	9998	3	146	2	[DNM1 - dynamin 1, DNM2 - dynamin 2]	CC
GO:0008092	cytoskeletal protein binding	1.86e-07	0.000729	3.03	9998	611	146	27	[ACTN1 - actinin, alpha 1, PDLIM5 - pdz and lim domain 5, ABI1 - abl-interactor 1, MPRIP - myosin phosphatase rho interacting protein, DAAM1 - dishevelled associated activator of morphogenesis 1, FLNA - filamin a, alpha, FLNB - filamin b, beta, CLSTN1 - calsyntenin 1, INF2 - inverted formin, fh2 and wh2 domain containing, NF2 - neurofibromin 2 (merlin), SVIL - supervillin, MACF1 - microtubule-act…	MF
GO:0003779	actin binding	5.41e-06	0.0106	3.97	9998	259	146	15	[MYO9B - myosin ixb, ACTN1 - actinin, alpha 1, PDLIM5 - pdz and lim domain 5, MPRIP - myosin phosphatase rho interacting protein, DAAM1 - dishevelled associated activator of morphogenesis 1, SORBS1 - sorbin and sh3 domain containing 1, FMNL3 - formin-like 3, SYNE2 - spectrin repeat containing, nuclear envelope 2, FLNA - filamin a, alpha, FLNB - filamin b, beta, INF2 - inverted formin, fh2 and wh2…	MF
GO:0030695	GTPase regulator activity	6.15e-05	0.0805	3.88	9998	212	146	12	[ARHGEF6 - rac/cdc42 guanine nucleotide exchange factor (gef) 6, MYO9B - myosin ixb, ARHGAP23 - rho gtpase activating protein 23, GAPVD1 - gtpase activating protein and vps9 domains 1, ARHGAP17 - rho gtpase activating protein 17, TBC1D1 - tbc1 (tre-2/usp6, bub2, cdc16) domain family, member 1, ITGB1BP1 - integrin beta 1 binding protein 1, ARHGEF10L - rho guanine nucleotide exchange factor (gef) 1…	MF
GO:0017016	Ras GTPase binding	6.97e-05	0.0684	3.04	9998	360	146	16	[MYO9B - myosin ixb, GAPVD1 - gtpase activating protein and vps9 domains 1, ARHGAP17 - rho gtpase activating protein 17, ARHGEF10L - rho guanine nucleotide exchange factor (gef) 10-like, DAAM1 - dishevelled associated activator of morphogenesis 1, EVI5L - ecotropic viral integration site 5-like, CAMK2G - calcium/calmodulin-dependent protein kinase ii gamma, ARHGEF6 - rac/cdc42 guanine nucleotide …	MF
GO:0060589	nucleoside-triphosphatase regulator activity	7.53e-05	0.0591	3.55	9998	251	146	13	[MYO9B - myosin ixb, GAPVD1 - gtpase activating protein and vps9 domains 1, ARHGAP17 - rho gtpase activating protein 17, ARHGEF10L - rho guanine nucleotide exchange factor (gef) 10-like, EVI5L - ecotropic viral integration site 5-like, SLIT2 - slit homolog 2 (drosophila), ARHGEF6 - rac/cdc42 guanine nucleotide exchange factor (gef) 6, ARHGAP23 - rho gtpase activating protein 23, FNIP2 - folliculi…	MF
GO:0031267	small GTPase binding	9.93e-05	0.065	2.95	9998	371	146	16	[MYO9B - myosin ixb, GAPVD1 - gtpase activating protein and vps9 domains 1, ARHGAP17 - rho gtpase activating protein 17, ARHGEF10L - rho guanine nucleotide exchange factor (gef) 10-like, DAAM1 - dishevelled associated activator of morphogenesis 1, EVI5L - ecotropic viral integration site 5-like, CAMK2G - calcium/calmodulin-dependent protein kinase ii gamma, ARHGEF6 - rac/cdc42 guanine nucleotide …	MF
GO:0017048	Rho GTPase binding	0.000103	0.0577	4.81	9998	128	146	9	[FMNL3 - formin-like 3, ARHGEF6 - rac/cdc42 guanine nucleotide exchange factor (gef) 6, MYO9B - myosin ixb, ARHGAP17 - rho gtpase activating protein 17, FLNA - filamin a, alpha, INF2 - inverted formin, fh2 and wh2 domain containing, ARHGEF10L - rho guanine nucleotide exchange factor (gef) 10-like, DAAM1 - dishevelled associated activator of morphogenesis 1, ECT2 - epithelial cell transforming seq…	MF
GO:0050839	cell adhesion molecule binding	0.000207	0.102	2.89	9998	355	146	15	[EIF4H - eukaryotic translation initiation factor 4h, GAPVD1 - gtpase activating protein and vps9 domains 1, ACTN1 - actinin, alpha 1, PDLIM5 - pdz and lim domain 5, ABI1 - abl-interactor 1, FN1 - fibronectin 1, LRRFIP1 - leucine rich repeat (in flii) interacting protein 1, EPN2 - epsin 2, MPRIP - myosin phosphatase rho interacting protein, FLNA - filamin a, alpha, ITGB1BP1 - integrin beta 1 bind…	MF
GO:0005096	GTPase activator activity	0.00044	0.192	3.62	9998	189	146	10	[ARHGEF6 - rac/cdc42 guanine nucleotide exchange factor (gef) 6, MYO9B - myosin ixb, ARHGAP23 - rho gtpase activating protein 23, GAPVD1 - gtpase activating protein and vps9 domains 1, ARHGAP17 - rho gtpase activating protein 17, TBC1D1 - tbc1 (tre-2/usp6, bub2, cdc16) domain family, member 1, ARHGEF10L - rho guanine nucleotide exchange factor (gef) 10-like, AGFG2 - arfgap with fg repeats 2, EVI5…	MF
GO:0031749	D2 dopamine receptor binding	0.000629	0.247	45.65	9998	3	146	2	[DNM1 - dynamin 1, DNM2 - dynamin 2]	MF
GO:0051020	GTPase binding	0.000644	0.23	2.5	9998	438	146	16	[MYO9B - myosin ixb, GAPVD1 - gtpase activating protein and vps9 domains 1, ARHGAP17 - rho gtpase activating protein 17, ARHGEF10L - rho guanine nucleotide exchange factor (gef) 10-like, EVI5L - ecotropic viral integration site 5-like, DAAM1 - dishevelled associated activator of morphogenesis 1, CAMK2G - calcium/calmodulin-dependent protein kinase ii gamma, ARHGEF6 - rac/cdc42 guanine nucleotide …	MF
GO:0008047	enzyme activator activity	0.00084	0.275	2.64	9998	363	146	14	[MYO9B - myosin ixb, ERCC6 - excision repair cross-complementing rodent repair deficiency, complementation group 6, GAPVD1 - gtpase activating protein and vps9 domains 1, ARHGAP17 - rho gtpase activating protein 17, FN1 - fibronectin 1, ARHGEF10L - rho guanine nucleotide exchange factor (gef) 10-like, EVI5L - ecotropic viral integration site 5-like, TRIM23 - tripartite motif containing 23, ARHGEF…	MF
GO:0030029	actin filament-based process	2.92e-07	0.00398	4.39	9998	265	146	17	[LDB3 - lim domain binding 3, MYO9B - myosin ixb, CDC42BPA - cdc42 binding protein kinase alpha (dmpk-like), ARHGEF10L - rho guanine nucleotide exchange factor (gef) 10-like, SLC9A1 - solute carrier family 9, subfamily a (nhe1, cation proton antiporter 1), member 1, PDLIM7 - pdz and lim domain 7 (enigma), DAAM1 - dishevelled associated activator of morphogenesis 1, SORBS1 - sorbin and sh3 domain …	BP
GO:0044087	regulation of cellular component biogenesis	6e-07	0.00409	2.85	9998	648	146	27	[PDLIM5 - pdz and lim domain 5, ARHGEF10L - rho guanine nucleotide exchange factor (gef) 10-like, SLC9A1 - solute carrier family 9, subfamily a (nhe1, cation proton antiporter 1), member 1, SLIT2 - slit homolog 2 (drosophila), LRRC16A - leucine rich repeat containing 16a, FUZ - fuzzy planar cell polarity protein, PHLDB1 - pleckstrin homology-like domain, family b, member 1, MTMR3 - myotubularin r…	BP
GO:0051128	regulation of cellular component organization	3.48e-06	0.0158	1.91	9998	1683	146	47	[PKD1 - polycystic kidney disease 1 (autosomal dominant), CBFA2T2 - core-binding factor, runt domain, alpha subunit 2; translocated to, 2, ITGA7 - integrin, alpha 7, PDLIM5 - pdz and lim domain 5, FN1 - fibronectin 1, ARHGEF10L - rho guanine nucleotide exchange factor (gef) 10-like, SLC9A1 - solute carrier family 9, subfamily a (nhe1, cation proton antiporter 1), member 1, SLIT2 - slit homolog 2 …	BP
GO:0010810	regulation of cell-substrate adhesion	4.2e-06	0.0143	5.58	9998	135	146	11	[FLNA - filamin a, alpha, ITGB1BP1 - integrin beta 1 binding protein 1, FN1 - fibronectin 1, DNM2 - dynamin 2, ABI3BP - abi family, member 3 (nesh) binding protein, LGALS1 - lectin, galactoside-binding, soluble, 1, NF2 - neurofibromin 2 (merlin), SLC9A1 - solute carrier family 9, subfamily a (nhe1, cation proton antiporter 1), member 1, LRRC16A - leucine rich repeat containing 16a, MACF1 - microt…	BP
GO:0007010	cytoskeleton organization	7.22e-06	0.0197	2.78	9998	567	146	23	[LDB3 - lim domain binding 3, CDC42BPA - cdc42 binding protein kinase alpha (dmpk-like), ARHGEF10L - rho guanine nucleotide exchange factor (gef) 10-like, PDLIM7 - pdz and lim domain 7 (enigma), DAAM1 - dishevelled associated activator of morphogenesis 1, MAST2 - microtubule associated serine/threonine kinase 2, SORBS1 - sorbin and sh3 domain containing 1, PARD3 - par-3 partitioning defective 3 h…	BP
GO:0043087	regulation of GTPase activity	1.43e-05	0.0325	3.47	9998	316	146	16	[MYO9B - myosin ixb, GAPVD1 - gtpase activating protein and vps9 domains 1, ARHGAP17 - rho gtpase activating protein 17, ARHGEF10L - rho guanine nucleotide exchange factor (gef) 10-like, EVI5L - ecotropic viral integration site 5-like, SLIT2 - slit homolog 2 (drosophila), ARHGEF6 - rac/cdc42 guanine nucleotide exchange factor (gef) 6, ARHGAP23 - rho gtpase activating protein 23, PAFAH1B1 - platel…	BP
GO:0120035	regulation of plasma membrane bounded cell projection organization	1.51e-05	0.0293	3.03	9998	430	146	19	[CBFA2T2 - core-binding factor, runt domain, alpha subunit 2; translocated to, 2, PDLIM5 - pdz and lim domain 5, FN1 - fibronectin 1, DNM2 - dynamin 2, EVI5L - ecotropic viral integration site 5-like, LRRC16A - leucine rich repeat containing 16a, SLIT2 - slit homolog 2 (drosophila), FUZ - fuzzy planar cell polarity protein, SDCCAG3 - serologically defined colon cancer antigen 3, PAFAH1B1 - platel…	BP
GO:0031344	regulation of cell projection organization	1.72e-05	0.0292	3	9998	434	146	19	[CBFA2T2 - core-binding factor, runt domain, alpha subunit 2; translocated to, 2, PDLIM5 - pdz and lim domain 5, FN1 - fibronectin 1, DNM2 - dynamin 2, EVI5L - ecotropic viral integration site 5-like, LRRC16A - leucine rich repeat containing 16a, SLIT2 - slit homolog 2 (drosophila), FUZ - fuzzy planar cell polarity protein, SDCCAG3 - serologically defined colon cancer antigen 3, PAFAH1B1 - platel…	BP
GO:1902017	regulation of cilium assembly	2.58e-05	0.0391	10.02	9998	41	146	6	[SDCCAG3 - serologically defined colon cancer antigen 3, SYNE2 - spectrin repeat containing, nuclear envelope 2, DNM2 - dynamin 2, EVI5L - ecotropic viral integration site 5-like, FUZ - fuzzy planar cell polarity protein, CEP120 - centrosomal protein 120kda]	BP
GO:0030036	actin cytoskeleton organization	3.82e-05	0.0521	3.79	9998	235	146	13	[LDB3 - lim domain binding 3, CDC42BPA - cdc42 binding protein kinase alpha (dmpk-like), ARHGEF10L - rho guanine nucleotide exchange factor (gef) 10-like, PDLIM7 - pdz and lim domain 7 (enigma), DAAM1 - dishevelled associated activator of morphogenesis 1, SORBS1 - sorbin and sh3 domain containing 1, FMNL3 - formin-like 3, PAFAH1B1 - platelet-activating factor acetylhydrolase 1b, regulatory subuni…	BP
GO:0032231	regulation of actin filament bundle assembly	5.65e-05	0.07	7.05	9998	68	146	7	[FLNA - filamin a, alpha, ITGB1BP1 - integrin beta 1 binding protein 1, PPFIA1 - protein tyrosine phosphatase, receptor type, f polypeptide (ptprf), interacting protein (liprin), alpha 1, ARHGEF10L - rho guanine nucleotide exchange factor (gef) 10-like, NF2 - neurofibromin 2 (merlin), SLC9A1 - solute carrier family 9, subfamily a (nhe1, cation proton antiporter 1), member 1, LRRC16A - leucine ric…	BP
GO:0110020	regulation of actomyosin structure organization	5.65e-05	0.0641	7.05	9998	68	146	7	[ITGB1BP1 - integrin beta 1 binding protein 1, PPFIA1 - protein tyrosine phosphatase, receptor type, f polypeptide (ptprf), interacting protein (liprin), alpha 1, ARHGEF10L - rho guanine nucleotide exchange factor (gef) 10-like, NF2 - neurofibromin 2 (merlin), SLC9A1 - solute carrier family 9, subfamily a (nhe1, cation proton antiporter 1), member 1, ECT2 - epithelial cell transforming sequence 2…	BP
GO:0050803	regulation of synapse structure or activity	5.91e-05	0.062	34.24	9998	6	146	3	[DNM1 - dynamin 1, DNM2 - dynamin 2, APP - amyloid beta (a4) precursor protein]	BP
GO:0030155	regulation of cell adhesion	0.00012	0.117	2.91	9998	377	146	16	[PKD1 - polycystic kidney disease 1 (autosomal dominant), FN1 - fibronectin 1, DNM2 - dynamin 2, SLC9A1 - solute carrier family 9, subfamily a (nhe1, cation proton antiporter 1), member 1, LRRC16A - leucine rich repeat containing 16a, FLNA - filamin a, alpha, ITGB1BP1 - integrin beta 1 binding protein 1, ABI3BP - abi family, member 3 (nesh) binding protein, SEMA6A - sema domain, transmembrane dom…	BP
GO:0010811	positive regulation of cell-substrate adhesion	0.000136	0.124	6.15	9998	78	146	7	[FLNA - filamin a, alpha, ITGB1BP1 - integrin beta 1 binding protein 1, FN1 - fibronectin 1, DNM2 - dynamin 2, ABI3BP - abi family, member 3 (nesh) binding protein, LRRC16A - leucine rich repeat containing 16a, MAP4K4 - mitogen-activated protein kinase kinase kinase kinase 4]	BP
GO:0010769	regulation of cell morphogenesis involved in differentiation	0.000155	0.132	3.79	9998	199	146	11	[PAFAH1B1 - platelet-activating factor acetylhydrolase 1b, regulatory subunit 1 (45kda), PDLIM5 - pdz and lim domain 5, FLNA - filamin a, alpha, ITGB1BP1 - integrin beta 1 binding protein 1, FN1 - fibronectin 1, DNM2 - dynamin 2, SEMA6A - sema domain, transmembrane domain (tm), and cytoplasmic domain, (semaphorin) 6a, NSMF - nmda receptor synaptonuclear signaling and neuronal migration factor, SL…	BP
GO:0022603	regulation of anatomical structure morphogenesis	0.00019	0.152	2.31	9998	653	146	22	[ITGA7 - integrin, alpha 7, PDLIM5 - pdz and lim domain 5, FN1 - fibronectin 1, EPN2 - epsin 2, DNM2 - dynamin 2, DAAM1 - dishevelled associated activator of morphogenesis 1, LRRC16A - leucine rich repeat containing 16a, SLIT2 - slit homolog 2 (drosophila), FUZ - fuzzy planar cell polarity protein, PHLDB1 - pleckstrin homology-like domain, family b, member 1, FMNL3 - formin-like 3, PAFAH1B1 - pla…	BP
GO:0044089	positive regulation of cellular component biogenesis	0.000201	0.152	2.9	9998	354	146	15	[DNM2 - dynamin 2, ARHGEF10L - rho guanine nucleotide exchange factor (gef) 10-like, LRRC16A - leucine rich repeat containing 16a, FUZ - fuzzy planar cell polarity protein, PHLDB1 - pleckstrin homology-like domain, family b, member 1, SDCCAG3 - serologically defined colon cancer antigen 3, FNIP2 - folliculin interacting protein 2, FLNA - filamin a, alpha, ITGB1BP1 - integrin beta 1 binding protei…	BP
GO:0098876	vesicle-mediated transport to the plasma membrane	0.000208	0.15	6.96	9998	59	146	6	[SDCCAG3 - serologically defined colon cancer antigen 3, DNM2 - dynamin 2, CLSTN1 - calsyntenin 1, TRIM23 - tripartite motif containing 23, BBS2 - bardet-biedl syndrome 2, MACF1 - microtubule-actin crosslinking factor 1]	BP
GO:0007160	cell-matrix adhesion	0.000229	0.156	6.85	9998	60	146	6	[PKD1 - polycystic kidney disease 1 (autosomal dominant), ITGA7 - integrin, alpha 7, ITGB1BP1 - integrin beta 1 binding protein 1, FN1 - fibronectin 1, PPFIA1 - protein tyrosine phosphatase, receptor type, f polypeptide (ptprf), interacting protein (liprin), alpha 1, SORBS1 - sorbin and sh3 domain containing 1]	BP
GO:0051492	regulation of stress fiber assembly	0.000251	0.163	6.74	9998	61	146	6	[ITGB1BP1 - integrin beta 1 binding protein 1, PPFIA1 - protein tyrosine phosphatase, receptor type, f polypeptide (ptprf), interacting protein (liprin), alpha 1, ARHGEF10L - rho guanine nucleotide exchange factor (gef) 10-like, NF2 - neurofibromin 2 (merlin), SLC9A1 - solute carrier family 9, subfamily a (nhe1, cation proton antiporter 1), member 1, LRRC16A - leucine rich repeat containing 16a]	BP
GO:0120032	regulation of plasma membrane bounded cell projection assembly	0.000271	0.168	4.76	9998	115	146	8	[SDCCAG3 - serologically defined colon cancer antigen 3, SYNE2 - spectrin repeat containing, nuclear envelope 2, DNM2 - dynamin 2, EVI5L - ecotropic viral integration site 5-like, SLIT2 - slit homolog 2 (drosophila), PLD1 - phospholipase d1, phosphatidylcholine-specific, FUZ - fuzzy planar cell polarity protein, CEP120 - centrosomal protein 120kda]	BP
GO:0060491	regulation of cell projection assembly	0.000287	0.17	4.72	9998	116	146	8	[SDCCAG3 - serologically defined colon cancer antigen 3, SYNE2 - spectrin repeat containing, nuclear envelope 2, DNM2 - dynamin 2, EVI5L - ecotropic viral integration site 5-like, SLIT2 - slit homolog 2 (drosophila), PLD1 - phospholipase d1, phosphatidylcholine-specific, FUZ - fuzzy planar cell polarity protein, CEP120 - centrosomal protein 120kda]	BP
GO:0031345	negative regulation of cell projection organization	0.000304	0.173	4.68	9998	117	146	8	[CBFA2T2 - core-binding factor, runt domain, alpha subunit 2; translocated to, 2, PAFAH1B1 - platelet-activating factor acetylhydrolase 1b, regulatory subunit 1 (45kda), DNM2 - dynamin 2, SEMA6A - sema domain, transmembrane domain (tm), and cytoplasmic domain, (semaphorin) 6a, LGALS1 - lectin, galactoside-binding, soluble, 1, EVI5L - ecotropic viral integration site 5-like, SLIT2 - slit homolog 2…	BP
GO:0050793	regulation of developmental process	0.000357	0.195	1.73	9998	1503	146	38	[CBFA2T2 - core-binding factor, runt domain, alpha subunit 2; translocated to, 2, ITGA7 - integrin, alpha 7, PDLIM5 - pdz and lim domain 5, FN1 - fibronectin 1, EPN2 - epsin 2, DAAM1 - dishevelled associated activator of morphogenesis 1, LRRC16A - leucine rich repeat containing 16a, SLIT2 - slit homolog 2 (drosophila), FUZ - fuzzy planar cell polarity protein, PHLDB1 - pleckstrin homology-like do…	BP
GO:0051493	regulation of cytoskeleton organization	0.000383	0.201	2.73	9998	376	146	15	[PKD1 - polycystic kidney disease 1 (autosomal dominant), ARHGAP17 - rho gtpase activating protein 17, ARHGEF10L - rho guanine nucleotide exchange factor (gef) 10-like, STAG2 - stromal antigen 2, SLC9A1 - solute carrier family 9, subfamily a (nhe1, cation proton antiporter 1), member 1, LRRC16A - leucine rich repeat containing 16a, SLIT2 - slit homolog 2 (drosophila), PHLDB1 - pleckstrin homology…	BP
GO:0007155	cell adhesion	0.000407	0.206	2.61	9998	420	146	16	[PKD1 - polycystic kidney disease 1 (autosomal dominant), CD99 - cd99 molecule, PDLIM5 - pdz and lim domain 5, ITGA7 - integrin, alpha 7, FN1 - fibronectin 1, SORBS1 - sorbin and sh3 domain containing 1, PARD3 - par-3 partitioning defective 3 homolog (c. elegans), FLNA - filamin a, alpha, ITGB1BP1 - integrin beta 1 binding protein 1, PPFIA1 - protein tyrosine phosphatase, receptor type, f polypep…	BP
GO:0043547	positive regulation of GTPase activity	0.000445	0.217	3.14	9998	262	146	12	[ARHGEF6 - rac/cdc42 guanine nucleotide exchange factor (gef) 6, MYO9B - myosin ixb, ARHGAP23 - rho gtpase activating protein 23, GAPVD1 - gtpase activating protein and vps9 domains 1, ARHGAP17 - rho gtpase activating protein 17, TBC1D1 - tbc1 (tre-2/usp6, bub2, cdc16) domain family, member 1, ARHGEF10L - rho guanine nucleotide exchange factor (gef) 10-like, AGFG2 - arfgap with fg repeats 2, EVI5…	BP
GO:0022610	biological adhesion	0.000452	0.212	2.58	9998	424	146	16	[PKD1 - polycystic kidney disease 1 (autosomal dominant), CD99 - cd99 molecule, PDLIM5 - pdz and lim domain 5, ITGA7 - integrin, alpha 7, FN1 - fibronectin 1, SORBS1 - sorbin and sh3 domain containing 1, PARD3 - par-3 partitioning defective 3 homolog (c. elegans), FLNA - filamin a, alpha, ITGB1BP1 - integrin beta 1 binding protein 1, PPFIA1 - protein tyrosine phosphatase, receptor type, f polypep…	BP
GO:2001224	positive regulation of neuron migration	0.000462	0.21	18.68	9998	11	146	3	[FLNA - filamin a, alpha, SEMA6A - sema domain, transmembrane domain (tm), and cytoplasmic domain, (semaphorin) 6a, NSMF - nmda receptor synaptonuclear signaling and neuronal migration factor]	BP
GO:0032233	positive regulation of actin filament bundle assembly	0.000581	0.255	7.29	9998	47	146	5	[FLNA - filamin a, alpha, ITGB1BP1 - integrin beta 1 binding protein 1, ARHGEF10L - rho guanine nucleotide exchange factor (gef) 10-like, NF2 - neurofibromin 2 (merlin), LRRC16A - leucine rich repeat containing 16a]	BP
GO:0032989	cellular component morphogenesis	0.000602	0.257	3.03	9998	271	146	12	[PARD3 - par-3 partitioning defective 3 homolog (c. elegans), PAFAH1B1 - platelet-activating factor acetylhydrolase 1b, regulatory subunit 1 (45kda), ACTN1 - actinin, alpha 1, FLNA - filamin a, alpha, FLNB - filamin b, beta, FN1 - fibronectin 1, DNM2 - dynamin 2, APP - amyloid beta (a4) precursor protein, ECT2 - epithelial cell transforming sequence 2 oncogene, FAT1 - fat atypical cadherin 1, SID…	BP
GO:0016185	synaptic vesicle budding from presynaptic endocytic zone membrane	0.000629	0.26	45.65	9998	3	146	2	[DNM1 - dynamin 1, DNM2 - dynamin 2]	BP
GO:0007161	calcium-independent cell-matrix adhesion	0.000629	0.252	45.65	9998	3	146	2	[PKD1 - polycystic kidney disease 1 (autosomal dominant), FN1 - fibronectin 1]	BP
GO:0032886	regulation of microtubule-based process	0.000715	0.278	3.71	9998	166	146	9	[PHLDB1 - pleckstrin homology-like domain, family b, member 1, PKD1 - polycystic kidney disease 1 (autosomal dominant), RHOT1 - ras homolog family member t1, PAFAH1B1 - platelet-activating factor acetylhydrolase 1b, regulatory subunit 1 (45kda), STAG2 - stromal antigen 2, BBS2 - bardet-biedl syndrome 2, MACF1 - microtubule-actin crosslinking factor 1, CEP120 - centrosomal protein 120kda, ERBB2 - …	BP
GO:0051960	regulation of nervous system development	0.000741	0.281	2.31	9998	533	146	18	[CBFA2T2 - core-binding factor, runt domain, alpha subunit 2; translocated to, 2, PDLIM5 - pdz and lim domain 5, FN1 - fibronectin 1, DNM2 - dynamin 2, SLIT2 - slit homolog 2 (drosophila), PARD3 - par-3 partitioning defective 3 homolog (c. elegans), PAFAH1B1 - platelet-activating factor acetylhydrolase 1b, regulatory subunit 1 (45kda), FLNA - filamin a, alpha, CLSTN1 - calsyntenin 1, SEMA6A - sem…	BP
GO:0051130	positive regulation of cellular component organization	0.00077	0.284	2	9998	821	146	24	[CBFA2T2 - core-binding factor, runt domain, alpha subunit 2; translocated to, 2, FN1 - fibronectin 1, DNM2 - dynamin 2, ARHGEF10L - rho guanine nucleotide exchange factor (gef) 10-like, LRRC16A - leucine rich repeat containing 16a, SLIT2 - slit homolog 2 (drosophila), FUZ - fuzzy planar cell polarity protein, PHLDB1 - pleckstrin homology-like domain, family b, member 1, SDCCAG3 - serologically d…	BP
GO:0022604	regulation of cell morphogenesis	0.000802	0.288	2.78	9998	320	146	13	[PDLIM5 - pdz and lim domain 5, ITGA7 - integrin, alpha 7, FN1 - fibronectin 1, DNM2 - dynamin 2, LRRC16A - leucine rich repeat containing 16a, SLIT2 - slit homolog 2 (drosophila), FMNL3 - formin-like 3, PAFAH1B1 - platelet-activating factor acetylhydrolase 1b, regulatory subunit 1 (45kda), FLNA - filamin a, alpha, ITGB1BP1 - integrin beta 1 binding protein 1, SEMA6A - sema domain, transmembrane …	BP
GO:0034330	cell junction organization	0.000833	0.291	4.03	9998	136	146	8	[PARD3 - par-3 partitioning defective 3 homolog (c. elegans), ACTN1 - actinin, alpha 1, FLNA - filamin a, alpha, FN1 - fibronectin 1, NF2 - neurofibromin 2 (merlin), ECT2 - epithelial cell transforming sequence 2 oncogene, GJC1 - gap junction protein, gamma 1, 45kda, SORBS1 - sorbin and sh3 domain containing 1]	BP
GO:0010770	positive regulation of cell morphogenesis involved in differentiation	0.000895	0.305	4.52	9998	106	146	7	[PAFAH1B1 - platelet-activating factor acetylhydrolase 1b, regulatory subunit 1 (45kda), FLNA - filamin a, alpha, FN1 - fibronectin 1, DNM2 - dynamin 2, SLIT2 - slit homolog 2 (drosophila), LRRC16A - leucine rich repeat containing 16a, MACF1 - microtubule-actin crosslinking factor 1]	BP
GO:0120033	negative regulation of plasma membrane bounded cell projection assembly	0.000987	0.328	14.67	9998	14	146	3	[DNM2 - dynamin 2, EVI5L - ecotropic viral integration site 5-like, SLIT2 - slit homolog 2 (drosophila)]	BP

## Sheet: P OE - P Ctr
GO.Term	Description	P.value	FDR.q.value	Enrichment	N	B	n	b	Genes	Category
GO:0044427	chromosomal part	1.79e-06	0.00328	1.39	10149	712	1749	170	[Kat8 - k (lysine) acetyltransferase 8, Ppp1r12a - protein phosphatase 1, regulatory subunit 12a, Thoc6 - tho complex 6 homolog (drosophila), Arrb1 - arrestin, beta 1, Orc2 - origin recognition complex, subunit 2, Ehmt2 - euchromatic histone lysine n-methyltransferase 2, Rarg - retinoic acid receptor, gamma, Stat6 - signal transducer and activator of transcription 6, interleukin-4 induced, Mbd1 -…	CC
GO:0005654	nucleoplasm	6.98e-05	0.0639	1.19	10149	1654	1749	340	[Snapc3 - small nuclear rna activating complex, polypeptide 3, Tcerg1 - transcription elongation regulator 1, Thoc6 - tho complex 6 homolog (drosophila), Taf6l - taf6-like rna polymerase ii, p300/cbp-associated factor (pcaf)-associated factor, Acly - atp citrate lyase, Orc2 - origin recognition complex, subunit 2, Ehmt2 - euchromatic histone lysine n-methyltransferase 2, Lmo7 - lim domain 7, Pex1…	CC
GO:0044454	nuclear chromosome part	7.56e-05	0.0461	1.42	10149	416	1749	102	[Kat8 - k (lysine) acetyltransferase 8, Thoc6 - tho complex 6 homolog (drosophila), Ehmt2 - euchromatic histone lysine n-methyltransferase 2, Orc2 - origin recognition complex, subunit 2, Rarg - retinoic acid receptor, gamma, Stat6 - signal transducer and activator of transcription 6, interleukin-4 induced, Mbd1 - methyl-cpg binding domain protein 1, Hey2 - hairy/enhancer-of-split related with yr…	CC
GO:0044430	cytoskeletal part	8.06e-05	0.0369	1.26	10149	1012	1749	219	[Eml4 - echinoderm microtubule associated protein like 4, Cep112 - centrosomal protein 112kda, Sorbs1 - sorbin and sh3 domain containing 1, Ppp1r12a - protein phosphatase 1, regulatory subunit 12a, Birc6 - baculoviral iap repeat-containing 6, Orc2 - origin recognition complex, subunit 2, Lrp8 - low density lipoprotein receptor-related protein 8, apolipoprotein e receptor, Myo9a - myosin ixa, Tbc1…	CC
GO:0005815	microtubule organizing center	0.000103	0.0378	1.37	10149	518	1749	122	[Cep112 - centrosomal protein 112kda, Ppp1r12a - protein phosphatase 1, regulatory subunit 12a, Sorbs1 - sorbin and sh3 domain containing 1, Ift46 - intraflagellar transport 46 homolog (chlamydomonas), Birc6 - baculoviral iap repeat-containing 6, Orc2 - origin recognition complex, subunit 2, Tbc1d31 - tbc1 domain family, member 31, Scyl1 - scy1-like 1 (s. cerevisiae), Bicd2 - bicaudal d homolog 2…	CC
GO:0044424	intracellular part	0.000147	0.0449	1.04	10149	8405	1749	1500	[Zfp523 - zinc finger protein 523, Eml4 - echinoderm microtubule associated protein like 4, Thada - thyroid adenoma associated, Srpk1 - srsf protein kinase 1, Stk38 - serine/threonine kinase 38, Acly - atp citrate lyase, Exoc5 - exocyst complex component 5, Birc6 - baculoviral iap repeat-containing 6, Ehmt2 - euchromatic histone lysine n-methyltransferase 2, Creb5 - camp responsive element bindin…	CC
omain, Cd44 - cd44 molecule, Duoxa1 - dual oxidase maturation factor 1, Slc25a46 - solute carrier family 25, member 46, Tpcn1 - two pore segment channel 1, Prpf19 - pre-mrna processing factor 19, Actn1 - actinin, alpha 1, Spg11 - spastic paraplegia 11 (autosomal recessive), Hsd3b7 - hydroxy-delta-5-steroid dehydrogenase, 3 beta- and steroid delta-isomerase 7, Arhgef10l - rho guanine nucleotide ex…										CC
gle1 rna export mediator, Atm - ataxia telangiectasia mutated, Plod3 - procollagen-lysine, 2-oxoglutarate 5-dioxygenase 3, Ncor1 - nuclear receptor co-repressor 1, Tor2a - torsin family 2, member a, Eif2ak2 - eukaryotic translation initiation factor 2-alpha kinase 2, Pcif1 - pdx1 c-terminal inhibiting factor 1, Fuz - fuzzy planar cell polarity protein, Rnf111 - ring finger protein 111, Llgl1 - le…										CC
GO:0005737	cytoplasm	0.000218	0.0569	1.11	10149	3208	1749	616	[Ddr1 - discoidin domain receptor tyrosine kinase 1, RGD735065 - similar to gi:13385412-like protein splice form i, Srpk1 - srsf protein kinase 1, Stk38 - serine/threonine kinase 38, Acly - atp citrate lyase, Stau1 - staufen double-stranded rna binding protein 1, Atg9a - autophagy related 9a, Ankzf1 - ankyrin repeat and zinc finger domain containing 1, Prtfdc1 - phosphoribosyl transferase domain …	CC
GO:0044451	nucleoplasm part	0.000361	0.0825	1.25	10149	863	1749	186	[Kat8 - k (lysine) acetyltransferase 8, Uspl1 - ubiquitin specific peptidase like 1, Snapc3 - small nuclear rna activating complex, polypeptide 3, Kansl3 - kat8 regulatory nsl complex subunit 3, Thoc6 - tho complex 6 homolog (drosophila), Taf6l - taf6-like rna polymerase ii, p300/cbp-associated factor (pcaf)-associated factor, Ehmt2 - euchromatic histone lysine n-methyltransferase 2, Arrb1 - arre…	CC
GO:0042995	cell projection	0.00039	0.0793	1.23	10149	1017	1749	215	[Plcb4 - phospholipase c, beta 4, Slc27a4 - solute carrier family 27 (fatty acid transporter), member 4, Stau1 - staufen double-stranded rna binding protein 1, Slc38a2 - solute carrier family 38, member 2, Tnk2 - tyrosine kinase, non-receptor, 2, Lrp8 - low density lipoprotein receptor-related protein 8, apolipoprotein e receptor, Zmynd8 - zinc finger, mynd-type containing 8, Samd4a - sterile alp…	CC
GO:0005912	adherens junction	0.000544	0.0995	1.52	10149	218	1749	57	[Ptk2b - protein tyrosine kinase 2 beta, Sorbs2 - sorbin and sh3 domain containing 2, Sorbs1 - sorbin and sh3 domain containing 1, Actn1 - actinin, alpha 1, Lima1 - lim domain and actin binding 1, Lmo7 - lim domain 7, Dst - dystonin, Tnk2 - tyrosine kinase, non-receptor, 2, Sptan1 - spectrin, alpha, non-erythrocytic 1, Nexn - nexilin (f actin binding protein), Tns1 - tensin 1, Pard3 - par-3 (part…	CC
GO:0005938	cell cortex	0.000587	0.0977	1.69	10149	127	1749	37	[Ndfip1 - nedd4 family interacting protein 1, Ptk2b - protein tyrosine kinase 2 beta, Arfip2 - adp-ribosylation factor interacting protein 2, Myo10 - myosin x, Wdpcp - wd repeat containing planar cell polarity effector, Akt2 - v-akt murine thymoma viral oncogene homolog 2, Clasp2 - cytoplasmic linker associated protein 2, Gipc1 - gipc pdz domain containing family, member 1, Phldb1 - pleckstrin ho…	CC
GO:0120025	plasma membrane bounded cell projection	0.000592	0.0903	1.22	10149	982	1749	207	[Plcb4 - phospholipase c, beta 4, Slc27a4 - solute carrier family 27 (fatty acid transporter), member 4, Stau1 - staufen double-stranded rna binding protein 1, Slc38a2 - solute carrier family 38, member 2, Tnk2 - tyrosine kinase, non-receptor, 2, Lrp8 - low density lipoprotein receptor-related protein 8, apolipoprotein e receptor, Zmynd8 - zinc finger, mynd-type containing 8, Samd4a - sterile alp…	CC
GO:0030054	cell junction	0.000631	0.0889	1.3	10149	576	1749	129	[Synj2bp - synaptojanin 2 binding protein, Sorbs1 - sorbin and sh3 domain containing 1, Dst - dystonin, Lmo7 - lim domain 7, Tnk2 - tyrosine kinase, non-receptor, 2, Tns1 - tensin 1, Pard3 - par-3 (partitioning defective 3) homolog (c. elegans), Samd4a - sterile alpha motif domain containing 4a, Sharpin - shank-associated rh domain interactor, Wnk4 - wnk lysine deficient protein kinase 4, Dcaf6 -…	CC
GO:0005813	centrosome	0.000683	0.0894	1.36	10149	410	1749	96	[Cdc16 - cell division cycle 16, Cep112 - centrosomal protein 112kda, Sorbs1 - sorbin and sh3 domain containing 1, Ppp1r12a - protein phosphatase 1, regulatory subunit 12a, Cep164 - centrosomal protein 164, Ift46 - intraflagellar transport 46 homolog (chlamydomonas), Orc2 - origin recognition complex, subunit 2, Ccp110 - centriolar coiled coil protein 110kda, Hipk1 - homeodomain interacting prote…	CC
GO:0045180	basal cortex	0.000778	0.0949	4.84	10149	6	1749	5	[Phldb2 - pleckstrin homology-like domain, family b, member 2, Clasp2 - cytoplasmic linker associated protein 2, Mark2 - map/microtubule affinity-regulating kinase 2, Clasp1 - cytoplasmic linker associated protein 1, Phldb1 - pleckstrin homology-like domain, family b, member 1]	CC
GO:0070776	MOZ/MORF histone acetyltransferase complex	0.000778	0.089	4.84	10149	6	1749	5	[Ing5 - inhibitor of growth family, member 5, Brpf1 - bromodomain and phd finger containing, 1, Brpf3 - bromodomain and phd finger containing, 3, Brd1 - bromodomain containing 1, Kat6a - k(lysine) acetyltransferase 6a]	CC
GO:0070775	H3 histone acetyltransferase complex	0.000778	0.0838	4.84	10149	6	1749	5	[Brpf1 - bromodomain and phd finger containing, 1, Ing5 - inhibitor of growth family, member 5, Brpf3 - bromodomain and phd finger containing, 3, Brd1 - bromodomain containing 1, Kat6a - k(lysine) acetyltransferase 6a]	CC
GO:0044428	nuclear part	0.000855	0.0869	1.1	10149	3111	1749	592	[RGD735065 - similar to gi:13385412-like protein splice form i, Acly - atp citrate lyase, Taf6l - taf6-like rna polymerase ii, p300/cbp-associated factor (pcaf)-associated factor, Ehmt2 - euchromatic histone lysine n-methyltransferase 2, Orc2 - origin recognition complex, subunit 2, Rarg - retinoic acid receptor, gamma, Smad1 - smad family member 1, Acaca - acetyl-coa carboxylase alpha, Ctdsp1 - …	CC
GO:0033063	Rad51B-Rad51C-Rad51D-XRCC2 complex	0.000879	0.0848	5.8	10149	4	1749	4	[Xrcc2 - x-ray repair complementing defective repair in chinese hamster cells 2, Rad51d - rad51 paralog d, Rad51b - rad51 paralog b, Rad51c - rad51 paralog c]	CC
GO:0044422	organelle part	0.000906	0.0829	1.06	10149	5568	1749	1019	[Eml4 - echinoderm microtubule associated protein like 4, Acly - atp citrate lyase, Birc6 - baculoviral iap repeat-containing 6, Ehmt2 - euchromatic histone lysine n-methyltransferase 2, Rarg - retinoic acid receptor, gamma, Acaca - acetyl-coa carboxylase alpha, Myo9a - myosin ixa, Mettl17 - methyltransferase like 17, Mbd1 - methyl-cpg binding domain protein 1, Samd4a - sterile alpha motif domain…	CC
erum response element-binding transcription factor), Ciao1 - cytosolic iron-sulfur protein assembly 1, Nfic - nuclear factor i/c, Mmp23 - matrix metallopeptidase 23, Bag6 - bcl2-associated athanogene 6, Clec16a - c-type lectin domain family 16, member a, Hjurp - holliday junction recognition protein, Plk4 - polo-like kinase 4, Kif1c - kinesin family member 1c, Taf1d - tata box binding protein (tb…										CC
GO:0070161	anchoring junction	0.000986	0.086	1.48	10149	223	1749	57	[Ptk2b - protein tyrosine kinase 2 beta, Sorbs2 - sorbin and sh3 domain containing 2, Sorbs1 - sorbin and sh3 domain containing 1, Actn1 - actinin, alpha 1, Lima1 - lim domain and actin binding 1, Lmo7 - lim domain 7, Dst - dystonin, Tnk2 - tyrosine kinase, non-receptor, 2, Sptan1 - spectrin, alpha, non-erythrocytic 1, Nexn - nexilin (f actin binding protein), Tns1 - tensin 1, Pard3 - par-3 (part…	CC
GO:0005096	GTPase activator activity	1.71e-06	0.00655	1.91	10149	152	1749	50	[Evi5 - ecotropic viral integration site 5, Nf1 - neurofibromin 1, Arhgef10l - rho guanine nucleotide exchange factor (gef) 10-like, Arrb1 - arrestin, beta 1, Arhgef12 - rho guanine nucleotide exchange factor (gef) 12, Tbc1d17 - tbc1 domain family, member 17, Myo9a - myosin ixa, Rgs19 - regulator of g-protein signaling 19, Tbc1d7 - tbc1 domain family, member 7, Arhgap23 - rho gtpase activating pr…	MF
GO:0030695	GTPase regulator activity	2.35e-06	0.0045	1.85	10149	166	1749	53	[Evi5 - ecotropic viral integration site 5, Nf1 - neurofibromin 1, Itgb1bp1 - integrin beta 1 binding protein 1, Arhgef10l - rho guanine nucleotide exchange factor (gef) 10-like, Arrb1 - arrestin, beta 1, Arhgef12 - rho guanine nucleotide exchange factor (gef) 12, Tbc1d17 - tbc1 domain family, member 17, Myo9a - myosin ixa, Rgs19 - regulator of g-protein signaling 19, Tbc1d7 - tbc1 domain family,…	MF
GO:0003682	chromatin binding	1.23e-05	0.0157	1.47	10149	423	1749	107	[Nsd1 - nuclear receptor binding set domain protein 1, Arid5a - at rich interactive domain 5a (mrf1 like), Ehmt2 - euchromatic histone lysine n-methyltransferase 2, Hinfp - histone h4 transcription factor, Mbd1 - methyl-cpg binding domain protein 1, Cdt1 - chromatin licensing and dna replication factor 1, Tcf7l2 - transcription factor 7-like 2 (t-cell specific, hmg-box), Cic - capicua transcripti…	MF
GO:0008017	microtubule binding	2.25e-05	0.0215	1.76	10149	165	1749	50	[Eml4 - echinoderm microtubule associated protein like 4, Chp1 - calcineurin-like ef-hand protein 1, Nf1 - neurofibromin 1, Dst - dystonin, Golga2 - golgin a2, Ska1 - spindle and kinetochore associated complex subunit 1, Numa1 - nuclear mitotic apparatus protein 1, Mast2 - microtubule associated serine/threonine kinase 2, Ccser2 - coiled-coil serine-rich protein 2, Dysf - dysferlin, Eml2 - echino…	MF
GO:0060589	nucleoside-triphosphatase regulator activity	5.26e-05	0.0402	1.65	10149	201	1749	57	[Evi5 - ecotropic viral integration site 5, Nf1 - neurofibromin 1, Itgb1bp1 - integrin beta 1 binding protein 1, Arhgef10l - rho guanine nucleotide exchange factor (gef) 10-like, Arrb1 - arrestin, beta 1, Arhgef12 - rho guanine nucleotide exchange factor (gef) 12, Tbc1d17 - tbc1 domain family, member 17, Myo9a - myosin ixa, Rgs19 - regulator of g-protein signaling 19, Tbc1d7 - tbc1 domain family,…	MF
GO:0017016	Ras GTPase binding	5.47e-05	0.0349	1.52	10149	298	1749	78	[Evi5 - ecotropic viral integration site 5, Trio - trio rho guanine nucleotide exchange factor, Exoc5 - exocyst complex component 5, Fmnl3 - formin-like 3, Arhgef10l - rho guanine nucleotide exchange factor (gef) 10-like, Arhgef12 - rho guanine nucleotide exchange factor (gef) 12, Als2cl - als2 c-terminal like, Tbc1d17 - tbc1 domain family, member 17, Tnpo2 - transportin 2, Vps52 - vacuolar prote…	MF
GO:0051020	GTPase binding	6.12e-05	0.0334	1.45	10149	380	1749	95	[Trio - trio rho guanine nucleotide exchange factor, Evi5 - ecotropic viral integration site 5, Exoc5 - exocyst complex component 5, Fmnl3 - formin-like 3, Arhgef10l - rho guanine nucleotide exchange factor (gef) 10-like, Arhgef12 - rho guanine nucleotide exchange factor (gef) 12, Als2cl - als2 c-terminal like, Tnpo2 - transportin 2, Tbc1d17 - tbc1 domain family, member 17, Vps52 - vacuolar prote…	MF
GO:0046965	retinoid X receptor binding	6.58e-05	0.0314	3.63	10149	16	1749	10	[Nsd1 - nuclear receptor binding set domain protein 1, Ncoa1 - nuclear receptor coactivator 1, Ncoa6 - nuclear receptor coactivator 6, Ncor1 - nuclear receptor co-repressor 1, Arid5a - at rich interactive domain 5a (mrf1 like), Fus - fused in sarcoma, Nr1h2 - nuclear receptor subfamily 1, group h, member 2, Rarg - retinoic acid receptor, gamma, Med25 - mediator complex subunit 25, Ncor2 - nuclear…	MF
GO:0004674	protein serine/threonine kinase activity	7.44e-05	0.0316	1.5	10149	310	1749	80	[Ntrk1 - neurotrophic tyrosine kinase, receptor, type 1, Ptk2b - protein tyrosine kinase 2 beta, Pik3ca - phosphatidylinositol-4,5-bisphosphate 3-kinase, catalytic subunit alpha, Trio - trio rho guanine nucleotide exchange factor, Srpk1 - srsf protein kinase 1, Stk38 - serine/threonine kinase 38, Akt2 - v-akt murine thymoma viral oncogene homolog 2, Irak1 - interleukin-1 receptor-associated kinas…	MF
GO:0031267	small GTPase binding	8.36e-05	0.032	1.49	10149	311	1749	80	[Evi5 - ecotropic viral integration site 5, Trio - trio rho guanine nucleotide exchange factor, Exoc5 - exocyst complex component 5, Fmnl3 - formin-like 3, Arhgef10l - rho guanine nucleotide exchange factor (gef) 10-like, Arhgef12 - rho guanine nucleotide exchange factor (gef) 12, Als2cl - als2 c-terminal like, Tbc1d17 - tbc1 domain family, member 17, Tnpo2 - transportin 2, Vps52 - vacuolar prote…	MF
GO:0000987	proximal promoter sequence-specific DNA binding	0.000142	0.0492	1.46	10149	330	1749	83	[Nsd1 - nuclear receptor binding set domain protein 1, Elk1 - elk1, member of ets oncogene family, Esrra - estrogen related receptor, alpha, Zfp143 - zinc finger protein 143, Tead1 - tea domain family member 1, Lrrfip1 - leucine rich repeat (in flii) interacting protein 1, Lhx2 - lim homeobox 2, Atf2 - activating transcription factor 2, Irf3 - interferon regulatory factor 3, Smad1 - smad family m…	MF
GO:0031701	angiotensin receptor binding	0.000151	0.0482	5.8	10149	5	1749	5	[Tyk2 - tyrosine kinase 2, Arrb1 - arrestin, beta 1, Arrb2 - arrestin, beta 2, Arap1 - arfgap with rhogap domain, ankyrin repeat and ph domain 1, Jak2 - janus kinase 2]	MF
GO:0016740	transferase activity	0.000151	0.0446	1.19	10149	1572	1749	322	[Ddr1 - discoidin domain receptor tyrosine kinase 1, Srpk1 - srsf protein kinase 1, Tyk2 - tyrosine kinase 2, Taf6l - taf6-like rna polymerase ii, p300/cbp-associated factor (pcaf)-associated factor, Acly - atp citrate lyase, Stk38 - serine/threonine kinase 38, Nosip - nitric oxide synthase interacting protein, Birc6 - baculoviral iap repeat-containing 6, Ehmt2 - euchromatic histone lysine n-meth…	MF
GO:0016772	transferase activity, transferring phosphorus-containing groups	0.000243	0.0664	1.29	10149	691	1749	154	[Dpagt1 - dolichyl-phosphate (udp-n-acetylglucosamine) n-acetylglucosaminephosphotransferase 1 (glcnac-1-p transferase), Trio - trio rho guanine nucleotide exchange factor, Ddr1 - discoidin domain receptor tyrosine kinase 1, Srpk1 - srsf protein kinase 1, Tyk2 - tyrosine kinase 2, Stk38 - serine/threonine kinase 38, Cdipt - cdp-diacylglycerol--inositol 3-phosphatidyltransferase, Dmpk - dystrophia…	MF
GO:0000978	RNA polymerase II proximal promoter sequence-specific DNA binding	0.000254	0.0648	1.45	10149	321	1749	80	[Nsd1 - nuclear receptor binding set domain protein 1, Elk1 - elk1, member of ets oncogene family, Esrra - estrogen related receptor, alpha, Zfp143 - zinc finger protein 143, Tead1 - tea domain family member 1, Lrrfip1 - leucine rich repeat (in flii) interacting protein 1, Lhx2 - lim homeobox 2, Atf2 - activating transcription factor 2, Irf3 - interferon regulatory factor 3, Smad1 - smad family m…	MF
GO:0140030	modification-dependent protein binding	0.000477	0.114	1.74	10149	117	1749	35	[Brd3 - bromodomain containing 3, Kat8 - k (lysine) acetyltransferase 8, Wdr5 - wd repeat domain 5, Rad23a - rad23 homolog a (s. cerevisiae), Zmynd8 - zinc finger, mynd-type containing 8, Phf2 - phd finger protein 2, Tab2 - tgf-beta activated kinase 1/map3k7 binding protein 2, Mtf2 - metal response element binding transcription factor 2, Sharpin - shank-associated rh domain interactor, Dnajb2 - d…	MF
GO:0001077	proximal promoter DNA-binding transcription activator activity, RNA polymerase II-specific	0.00049	0.11	1.58	10149	180	1749	49	[Elk1 - elk1, member of ets oncogene family, Camta2 - calmodulin binding transcription activator 2, Esrra - estrogen related receptor, alpha, Zfp143 - zinc finger protein 143, Tead1 - tea domain family member 1, Creb5 - camp responsive element binding protein 5, Lhx2 - lim homeobox 2, Irf3 - interferon regulatory factor 3, Atf2 - activating transcription factor 2, Smad1 - smad family member 1, Cr…	MF
GO:0070878	primary miRNA binding	0.00053	0.113	4.35	10149	8	1749	6	[Smad2 - smad family member 2, Srf - serum response factor (c-fos serum response element-binding transcription factor), Ezh2 - enhancer of zeste homolog 2 (drosophila), Smad3 - smad family member 3, Smad1 - smad family member 1, Drosha - drosha, ribonuclease type iii]	MF
GO:0008092	cytoskeletal protein binding	0.000561	0.113	1.3	10149	600	1749	134	[Eml4 - echinoderm microtubule associated protein like 4, Nf1 - neurofibromin 1, Myo10 - myosin x, Dst - dystonin, Lmo7 - lim domain 7, Golga2 - golgin a2, Lrp8 - low density lipoprotein receptor-related protein 8, apolipoprotein e receptor, Myo9a - myosin ixa, Hip1r - huntingtin interacting protein 1 related, Bicd2 - bicaudal d homolog 2 (drosophila), Ska1 - spindle and kinetochore associated co…	MF
GO:0042974	retinoic acid receptor binding	0.000588	0.112	2.68	10149	26	1749	12	[Nsd1 - nuclear receptor binding set domain protein 1, Ncoa1 - nuclear receptor coactivator 1, Ncoa6 - nuclear receptor coactivator 6, Ncor1 - nuclear receptor co-repressor 1, Arid5a - at rich interactive domain 5a (mrf1 like), Fus - fused in sarcoma, Nr1h2 - nuclear receptor subfamily 1, group h, member 2, Rarg - retinoic acid receptor, gamma, Ncor2 - nuclear receptor co-repressor 2, Med25 - med…	MF
GO:0004672	protein kinase activity	0.000683	0.124	1.35	10149	420	1749	98	[Trio - trio rho guanine nucleotide exchange factor, Ddr1 - discoidin domain receptor tyrosine kinase 1, Srpk1 - srsf protein kinase 1, Tyk2 - tyrosine kinase 2, Stk38 - serine/threonine kinase 38, Dmpk - dystrophia myotonica-protein kinase, Speg - speg complex locus, Tnk2 - tyrosine kinase, non-receptor, 2, Scyl1 - scy1-like 1 (s. cerevisiae), Camk2g - calcium/calmodulin-dependent protein kinase…	MF
GO:0016773	phosphotransferase activity, alcohol group as acceptor	0.00076	0.132	1.32	10149	502	1749	114	[Trio - trio rho guanine nucleotide exchange factor, Ddr1 - discoidin domain receptor tyrosine kinase 1, Srpk1 - srsf protein kinase 1, Tyk2 - tyrosine kinase 2, Stk38 - serine/threonine kinase 38, Dmpk - dystrophia myotonica-protein kinase, Speg - speg complex locus, Tnk2 - tyrosine kinase, non-receptor, 2, Scyl1 - scy1-like 1 (s. cerevisiae), Camk2g - calcium/calmodulin-dependent protein kinase…	MF
GO:0070412	R-SMAD binding	0.000777	0.129	2.9	10149	20	1749	10	[Men1 - multiple endocrine neoplasia i, Smad2 - smad family member 2, Smurf1 - smad specific e3 ubiquitin protein ligase 1, Smad3 - smad family member 3, Myocd - myocardin, Drosha - drosha, ribonuclease type iii, Zc3h3 - zinc finger ccch type containing 3, Trim33 - tripartite motif-containing 33, Smad4 - smad family member 4, Ranbp3 - ran binding protein 3]	MF
GO:0016301	kinase activity	0.000857	0.137	1.29	10149	570	1749	127	[Trio - trio rho guanine nucleotide exchange factor, Ddr1 - discoidin domain receptor tyrosine kinase 1, Srpk1 - srsf protein kinase 1, Tyk2 - tyrosine kinase 2, Stk38 - serine/threonine kinase 38, Dmpk - dystrophia myotonica-protein kinase, Speg - speg complex locus, Tnk2 - tyrosine kinase, non-receptor, 2, Scyl1 - scy1-like 1 (s. cerevisiae), Camk2g - calcium/calmodulin-dependent protein kinase…	MF
GO:0031702	type 1 angiotensin receptor binding	0.000879	0.135	5.8	10149	4	1749	4	[Tyk2 - tyrosine kinase 2, Arrb2 - arrestin, beta 2, Arap1 - arfgap with rhogap domain, ankyrin repeat and ph domain 1, Jak2 - janus kinase 2]	MF
GO:0043547	positive regulation of GTPase activity	3.79e-06	0.0526	1.7	10149	229	1749	67	[Ntrk1 - neurotrophic tyrosine kinase, receptor, type 1, Ptk2b - protein tyrosine kinase 2 beta, Evi5 - ecotropic viral integration site 5, Nf1 - neurofibromin 1, Akt2 - v-akt murine thymoma viral oncogene homolog 2, Arrb1 - arrestin, beta 1, Arhgef12 - rho guanine nucleotide exchange factor (gef) 12, Tbc1d17 - tbc1 domain family, member 17, Myo9a - myosin ixa, Rgs19 - regulator of g-protein sign…	BP
GO:0043087	regulation of GTPase activity	4.25e-06	0.0295	1.62	10149	279	1749	78	[Ptk2b - protein tyrosine kinase 2 beta, Ntrk1 - neurotrophic tyrosine kinase, receptor, type 1, Evi5 - ecotropic viral integration site 5, Nf1 - neurofibromin 1, Akt2 - v-akt murine thymoma viral oncogene homolog 2, Itgb1bp1 - integrin beta 1 binding protein 1, Arrb1 - arrestin, beta 1, Arhgef12 - rho guanine nucleotide exchange factor (gef) 12, Arrb2 - arrestin, beta 2, Tbc1d17 - tbc1 domain fa…	BP
GO:0051130	positive regulation of cellular component organization	1.26e-05	0.0584	1.32	10149	851	1749	193	[RGD735065 - similar to gi:13385412-like protein splice form i, Pih1d1 - pih1 domain containing 1, Smad1 - smad family member 1, Med25 - mediator complex subunit 25, Lrp8 - low density lipoprotein receptor-related protein 8, apolipoprotein e receptor, Zmynd8 - zinc finger, mynd-type containing 8, Ddhd1 - ddhd domain containing 1, Ahr - aryl hydrocarbon receptor, Dab2 - disabled 2, mitogen-respons…	BP
GO:0031058	positive regulation of histone modification	1.55e-05	0.0537	2.15	10149	81	1749	30	[RGD735065 - similar to gi:13385412-like protein splice form i, Nipbl - nipped-b homolog (drosophila), Arid5a - at rich interactive domain 5a (mrf1 like), Pih1d1 - pih1 domain containing 1, Arrb1 - arrestin, beta 1, Piwil2 - piwi-like rna-mediated gene silencing 2, Ctbp1 - c-terminal binding protein 1, Mtf2 - metal response element binding transcription factor 2, Prkd2 - protein kinase d2, Vegfa …	BP
GO:0018193	peptidyl-amino acid modification	1.91e-05	0.053	1.39	10149	554	1749	133	[Nsd1 - nuclear receptor binding set domain protein 1, Kat8 - k (lysine) acetyltransferase 8, Ddr1 - discoidin domain receptor tyrosine kinase 1, Uspl1 - ubiquitin specific peptidase like 1, Kansl3 - kat8 regulatory nsl complex subunit 3, Tyk2 - tyrosine kinase 2, Taf6l - taf6-like rna polymerase ii, p300/cbp-associated factor (pcaf)-associated factor, Stk38 - serine/threonine kinase 38, Ehmt2 - …	BP
GO:0010557	positive regulation of macromolecule biosynthetic process	2.64e-05	0.0612	1.24	10149	1236	1749	265	[Zfp523 - zinc finger protein 523, Ppp1r12a - protein phosphatase 1, regulatory subunit 12a, Sorbs1 - sorbin and sh3 domain containing 1, Taf6l - taf6-like rna polymerase ii, p300/cbp-associated factor (pcaf)-associated factor, Pih1d1 - pih1 domain containing 1, Creb5 - camp responsive element binding protein 5, Irf3 - interferon regulatory factor 3, Lmo7 - lim domain 7, Rarg - retinoic acid rece…	BP
GO:0031056	regulation of histone modification	3.03e-05	0.0602	1.87	10149	124	1749	40	[Nsd1 - nuclear receptor binding set domain protein 1, RGD735065 - similar to gi:13385412-like protein splice form i, Nipbl - nipped-b homolog (drosophila), Arid5a - at rich interactive domain 5a (mrf1 like), Trip12 - thyroid hormone receptor interactor 12, Pih1d1 - pih1 domain containing 1, Arrb1 - arrestin, beta 1, Ehmt2 - euchromatic histone lysine n-methyltransferase 2, Piwil2 - piwi-like rna…	BP
GO:0018205	peptidyl-lysine modification	3.06e-05	0.0532	1.67	10149	202	1749	58	[Kat8 - k (lysine) acetyltransferase 8, Nsd1 - nuclear receptor binding set domain protein 1, Kansl3 - kat8 regulatory nsl complex subunit 3, Uspl1 - ubiquitin specific peptidase like 1, Taf6l - taf6-like rna polymerase ii, p300/cbp-associated factor (pcaf)-associated factor, Ehmt2 - euchromatic histone lysine n-methyltransferase 2, Atf2 - activating transcription factor 2, Naa60 - n(alpha)-acety…	BP
GO:0016043	cellular component organization	3.52e-05	0.0543	1.13	10149	3145	1749	613	[Eml4 - echinoderm microtubule associated protein like 4, Ddr1 - discoidin domain receptor tyrosine kinase 1, Srpk1 - srsf protein kinase 1, Exoc5 - exocyst complex component 5, Taf6l - taf6-like rna polymerase ii, p300/cbp-associated factor (pcaf)-associated factor, Scube3 - signal peptide, cub domain, egf-like 3, Mia3 - melanoma inhibitory activity family, member 3, Ehmt2 - euchromatic histone …	BP
GO:0006996	organelle organization	3.71e-05	0.0515	1.21	10149	1513	1749	316	[Eml4 - echinoderm microtubule associated protein like 4, Sorbs1 - sorbin and sh3 domain containing 1, Exoc5 - exocyst complex component 5, Ehmt2 - euchromatic histone lysine n-methyltransferase 2, Pex19 - peroxisomal biogenesis factor 19, Atg9a - autophagy related 9a, Eln - elastin, Ndc1 - ndc1 transmembrane nucleoporin, Aunip - aurora kinase a and ninein interacting protein, Ddhd1 - ddhd domain…	BP
GO:0033043	regulation of organelle organization	4.34e-05	0.0549	1.28	10149	909	1749	201	[Eml4 - echinoderm microtubule associated protein like 4, RGD735065 - similar to gi:13385412-like protein splice form i, Pih1d1 - pih1 domain containing 1, Ehmt2 - euchromatic histone lysine n-methyltransferase 2, Eln - elastin, Zmynd8 - zinc finger, mynd-type containing 8, Ska1 - spindle and kinetochore associated complex subunit 1, Ddhd1 - ddhd domain containing 1, Vps11 - vacuolar protein sort…	BP
GO:0031328	positive regulation of cellular biosynthetic process	4.38e-05	0.0508	1.23	10149	1292	1749	274	[Zfp523 - zinc finger protein 523, Ppp1r12a - protein phosphatase 1, regulatory subunit 12a, Sorbs1 - sorbin and sh3 domain containing 1, Taf6l - taf6-like rna polymerase ii, p300/cbp-associated factor (pcaf)-associated factor, Pih1d1 - pih1 domain containing 1, Creb5 - camp responsive element binding protein 5, Lmo7 - lim domain 7, Irf3 - interferon regulatory factor 3, Rarg - retinoic acid rece…	BP
GO:0043412	macromolecule modification	4.5e-05	0.0481	1.18	10149	1911	1749	389	[Ddr1 - discoidin domain receptor tyrosine kinase 1, Thada - thyroid adenoma associated, Srpk1 - srsf protein kinase 1, Stk38 - serine/threonine kinase 38, Taf6l - taf6-like rna polymerase ii, p300/cbp-associated factor (pcaf)-associated factor, Birc6 - baculoviral iap repeat-containing 6, Ehmt2 - euchromatic histone lysine n-methyltransferase 2, Smad1 - smad family member 1, Speg - speg complex …	BP
GO:0006464	cellular protein modification process	5.02e-05	0.0499	1.19	10149	1772	1749	363	[Ddr1 - discoidin domain receptor tyrosine kinase 1, Srpk1 - srsf protein kinase 1, Ppp1r12a - protein phosphatase 1, regulatory subunit 12a, Tyk2 - tyrosine kinase 2, Taf6l - taf6-like rna polymerase ii, p300/cbp-associated factor (pcaf)-associated factor, Stk38 - serine/threonine kinase 38, Nosip - nitric oxide synthase interacting protein, Birc6 - baculoviral iap repeat-containing 6, Ehmt2 - e…	BP
GO:0036211	protein modification process	5.02e-05	0.0466	1.19	10149	1772	1749	363	[Ddr1 - discoidin domain receptor tyrosine kinase 1, Srpk1 - srsf protein kinase 1, Ppp1r12a - protein phosphatase 1, regulatory subunit 12a, Tyk2 - tyrosine kinase 2, Taf6l - taf6-like rna polymerase ii, p300/cbp-associated factor (pcaf)-associated factor, Stk38 - serine/threonine kinase 38, Nosip - nitric oxide synthase interacting protein, Birc6 - baculoviral iap repeat-containing 6, Ehmt2 - e…	BP
GO:0009653	anatomical structure morphogenesis	5.63e-05	0.0489	1.29	10149	861	1749	191	[Nsd1 - nuclear receptor binding set domain protein 1, Nf1 - neurofibromin 1, Ddr1 - discoidin domain receptor tyrosine kinase 1, Exoc5 - exocyst complex component 5, Dst - dystonin, Rarg - retinoic acid receptor, gamma, Stat6 - signal transducer and activator of transcription 6, interleukin-4 induced, Lrp8 - low density lipoprotein receptor-related protein 8, apolipoprotein e receptor, Eln - ela…	BP
GO:0007017	microtubule-based process	5.73e-05	0.0469	1.43	10149	423	1749	104	[Eml4 - echinoderm microtubule associated protein like 4, Ppp1r12a - protein phosphatase 1, regulatory subunit 12a, Ift46 - intraflagellar transport 46 homolog (chlamydomonas), Stau1 - staufen double-stranded rna binding protein 1, Dst - dystonin, Golga2 - golgin a2, Bicd2 - bicaudal d homolog 2 (drosophila), Aunip - aurora kinase a and ninein interacting protein, Pard3 - par-3 (partitioning defe…	BP
GO:1903508	positive regulation of nucleic acid-templated transcription	5.99e-05	0.0462	1.26	10149	1044	1749	226	[Zfp523 - zinc finger protein 523, Ppp1r12a - protein phosphatase 1, regulatory subunit 12a, Taf6l - taf6-like rna polymerase ii, p300/cbp-associated factor (pcaf)-associated factor, Pih1d1 - pih1 domain containing 1, Creb5 - camp responsive element binding protein 5, Irf3 - interferon regulatory factor 3, Lmo7 - lim domain 7, Rarg - retinoic acid receptor, gamma, Smad1 - smad family member 1, Me…	BP
GO:1902680	positive regulation of RNA biosynthetic process	6.38e-05	0.0467	1.25	10149	1045	1749	226	[Zfp523 - zinc finger protein 523, Ppp1r12a - protein phosphatase 1, regulatory subunit 12a, Taf6l - taf6-like rna polymerase ii, p300/cbp-associated factor (pcaf)-associated factor, Pih1d1 - pih1 domain containing 1, Creb5 - camp responsive element binding protein 5, Lmo7 - lim domain 7, Irf3 - interferon regulatory factor 3, Rarg - retinoic acid receptor, gamma, Smad1 - smad family member 1, Me…	BP
GO:0031325	positive regulation of cellular metabolic process	6.88e-05	0.0478	1.16	10149	2155	1749	432	[Zfp523 - zinc finger protein 523, Ddr1 - discoidin domain receptor tyrosine kinase 1, RGD735065 - similar to gi:13385412-like protein splice form i, Taf6l - taf6-like rna polymerase ii, p300/cbp-associated factor (pcaf)-associated factor, Creb5 - camp responsive element binding protein 5, Dom3z - dom-3 homolog z (c. elegans), Smad1 - smad family member 1, Rarg - retinoic acid receptor, gamma, At…	BP
GO:0031122	cytoplasmic microtubule organization	7.19e-05	0.0476	2.45	10149	45	1749	19	[Chp1 - calcineurin-like ef-hand protein 1, Apc - adenomatous polyposis coli, Tubgcp5 - tubulin, gamma complex associated protein 5, Dvl1 - dishevelled segment polarity protein 1, Tubgcp6 - tubulin, gamma complex associated protein 6, Dst - dystonin, Numa1 - nuclear mitotic apparatus protein 1, Ift88 - intraflagellar transport 88 homolog (chlamydomonas), Pafah1b1 - platelet-activating factor acet…	BP
GO:2001252	positive regulation of chromosome organization	7.43e-05	0.047	1.74	10149	150	1749	45	[RGD735065 - similar to gi:13385412-like protein splice form i, Nipbl - nipped-b homolog (drosophila), Arid5a - at rich interactive domain 5a (mrf1 like), Hnrnpa2b1 - heterogeneous nuclear ribonucleoprotein a2/b1, Pih1d1 - pih1 domain containing 1, Arrb1 - arrestin, beta 1, Piwil2 - piwi-like rna-mediated gene silencing 2, Gnl3 - guanine nucleotide binding protein-like 3 (nucleolar), Pnkp - polyn…	BP
GO:0030030	cell projection organization	8.69e-05	0.0525	1.36	10149	556	1749	130	[Ddr1 - discoidin domain receptor tyrosine kinase 1, Exoc5 - exocyst complex component 5, Ift46 - intraflagellar transport 46 homolog (chlamydomonas), Dst - dystonin, Lrp8 - low density lipoprotein receptor-related protein 8, apolipoprotein e receptor, E2f5 - e2f transcription factor 5, Cep290 - centrosomal protein 290, Szt2 - seizure threshold 2 homolog (mouse), Megf8 - multiple egf-like-domains…	BP
GO:0045893	positive regulation of transcription, DNA-templated	8.86e-05	0.0513	1.26	10149	1003	1749	217	[Zfp523 - zinc finger protein 523, Ppp1r12a - protein phosphatase 1, regulatory subunit 12a, Pih1d1 - pih1 domain containing 1, Creb5 - camp responsive element binding protein 5, Lmo7 - lim domain 7, Irf3 - interferon regulatory factor 3, Rarg - retinoic acid receptor, gamma, Smad1 - smad family member 1, Med25 - mediator complex subunit 25, Atxn7l3 - ataxin 7-like 3, E2f5 - e2f transcription fac…	BP
GO:0071840	cellular component organization or biogenesis	9.01e-05	0.0501	1.12	10149	3185	1749	616	[Eml4 - echinoderm microtubule associated protein like 4, Ddr1 - discoidin domain receptor tyrosine kinase 1, Srpk1 - srsf protein kinase 1, Exoc5 - exocyst complex component 5, Taf6l - taf6-like rna polymerase ii, p300/cbp-associated factor (pcaf)-associated factor, Scube3 - signal peptide, cub domain, egf-like 3, Mia3 - melanoma inhibitory activity family, member 3, Ehmt2 - euchromatic histone …	BP
GO:1905269	positive regulation of chromatin organization	9.42e-05	0.0504	1.98	10149	88	1749	30	[RGD735065 - similar to gi:13385412-like protein splice form i, Nipbl - nipped-b homolog (drosophila), Arid5a - at rich interactive domain 5a (mrf1 like), Pih1d1 - pih1 domain containing 1, Arrb1 - arrestin, beta 1, Piwil2 - piwi-like rna-mediated gene silencing 2, Ctbp1 - c-terminal binding protein 1, Mtf2 - metal response element binding transcription factor 2, Prkd2 - protein kinase d2, Vegfa …	BP
GO:0048522	positive regulation of cellular process	0.00011	0.0568	1.12	10149	3286	1749	633	[Zfp523 - zinc finger protein 523, Ddr1 - discoidin domain receptor tyrosine kinase 1, RGD735065 - similar to gi:13385412-like protein splice form i, Taf6l - taf6-like rna polymerase ii, p300/cbp-associated factor (pcaf)-associated factor, Scube3 - signal peptide, cub domain, egf-like 3, Birc6 - baculoviral iap repeat-containing 6, Unc5b - unc-5 homolog b (c. elegans), Mia3 - melanoma inhibitory …	BP
GO:0051128	regulation of cellular component organization	0.00012	0.0597	1.18	10149	1719	1749	350	[Eml4 - echinoderm microtubule associated protein like 4, Ddr1 - discoidin domain receptor tyrosine kinase 1, RGD735065 - similar to gi:13385412-like protein splice form i, Pih1d1 - pih1 domain containing 1, Ehmt2 - euchromatic histone lysine n-methyltransferase 2, Smad1 - smad family member 1, Med25 - mediator complex subunit 25, Tnk2 - tyrosine kinase, non-receptor, 2, Lrp8 - low density lipopr…	BP
GO:0009891	positive regulation of biosynthetic process	0.000127	0.0608	1.21	10149	1316	1749	275	[Zfp523 - zinc finger protein 523, Sorbs1 - sorbin and sh3 domain containing 1, Ppp1r12a - protein phosphatase 1, regulatory subunit 12a, Taf6l - taf6-like rna polymerase ii, p300/cbp-associated factor (pcaf)-associated factor, Pih1d1 - pih1 domain containing 1, Creb5 - camp responsive element binding protein 5, Irf3 - interferon regulatory factor 3, Lmo7 - lim domain 7, Rarg - retinoic acid rece…	BP
GO:0046777	protein autophosphorylation	0.000127	0.059	1.74	10149	140	1749	42	[Ntrk1 - neurotrophic tyrosine kinase, receptor, type 1, Ptk2b - protein tyrosine kinase 2 beta, Ddr1 - discoidin domain receptor tyrosine kinase 1, Mink1 - misshapen-like kinase 1, Ttk - ttk protein kinase, Irak1 - interleukin-1 receptor-associated kinase 1, Taok3 - tao kinase 3, Prkcg - protein kinase c, gamma, Tyro3 - tyro3 protein tyrosine kinase, Pask - pas domain containing serine/threonine…	BP
GO:0007020	microtubule nucleation	0.000135	0.0606	3.41	10149	17	1749	10	[Csnk1d - casein kinase 1, delta, Tubgcp5 - tubulin, gamma complex associated protein 5, Tubgcp4 - tubulin, gamma complex associated protein 4, Clasp2 - cytoplasmic linker associated protein 2, Tubgcp6 - tubulin, gamma complex associated protein 6, Tubg1 - tubulin, gamma 1, Clasp1 - cytoplasmic linker associated protein 1, Golga2 - golgin a2, Slain2 - slain motif family, member 2, Ndel1 - nude nu…	BP
GO:0065007	biological regulation	0.000141	0.061	1.06	10149	6271	1749	1148	[Zfp523 - zinc finger protein 523, Eml4 - echinoderm microtubule associated protein like 4, Thada - thyroid adenoma associated, Srpk1 - srsf protein kinase 1, Stk38 - serine/threonine kinase 38, Exoc5 - exocyst complex component 5, Birc6 - baculoviral iap repeat-containing 6, Unc5b - unc-5 homolog b (c. elegans), Zfp236 - zinc finger protein 236, Ehmt2 - euchromatic histone lysine n-methyltransfe…	BP
n 5, Dixdc1 - dix domain containing 1, Vegfa - vascular endothelial growth factor a, Brat1 - brca1-associated atm activator 1, Wdr61 - wd repeat domain 61, Tnip1 - tnfaip3 interacting protein 1, Tcf7 - transcription factor 7 (t-cell specific, hmg-box), Gsk3b - glycogen synthase kinase 3 beta, Flna - filamin a, alpha, Stard13 - star-related lipid transfer (start) domain containing 13, Det1 - de-et…										BP
GO:0051254	positive regulation of RNA metabolic process	0.000142	0.0599	1.23	10149	1116	1749	237	[Zfp523 - zinc finger protein 523, Ppp1r12a - protein phosphatase 1, regulatory subunit 12a, Taf6l - taf6-like rna polymerase ii, p300/cbp-associated factor (pcaf)-associated factor, Pih1d1 - pih1 domain containing 1, Creb5 - camp responsive element binding protein 5, Irf3 - interferon regulatory factor 3, Lmo7 - lim domain 7, Dom3z - dom-3 homolog z (c. elegans), Rarg - retinoic acid receptor, g…	BP
GO:1902275	regulation of chromatin organization	0.000142	0.0582	1.72	10149	145	1749	43	[Nsd1 - nuclear receptor binding set domain protein 1, RGD735065 - similar to gi:13385412-like protein splice form i, Nipbl - nipped-b homolog (drosophila), Arid5a - at rich interactive domain 5a (mrf1 like), Pih1d1 - pih1 domain containing 1, Trip12 - thyroid hormone receptor interactor 12, Arrb1 - arrestin, beta 1, Ehmt2 - euchromatic histone lysine n-methyltransferase 2, Piwil2 - piwi-like rna…	BP
GO:0010623	programmed cell death involved in cell development	0.000155	0.0617	4.97	10149	7	1749	6	[Casp2 - caspase 2, Ntrk1 - neurotrophic tyrosine kinase, receptor, type 1, Bax - bcl2-associated x protein, Slc4a7 - solute carrier family 4, sodium bicarbonate cotransporter, member 7, Kitlg - kit ligand, Prkdc - protein kinase, dna activated, catalytic polypeptide]	BP
GO:0050794	regulation of cellular process	0.000158	0.0611	1.07	10149	5632	1749	1039	[Zfp523 - zinc finger protein 523, Eml4 - echinoderm microtubule associated protein like 4, Srpk1 - srsf protein kinase 1, Stk38 - serine/threonine kinase 38, Birc6 - baculoviral iap repeat-containing 6, Unc5b - unc-5 homolog b (c. elegans), Ehmt2 - euchromatic histone lysine n-methyltransferase 2, Creb5 - camp responsive element binding protein 5, Dom3z - dom-3 homolog z (c. elegans), Rarg - ret…	BP
factor (gef) 2, Ifnar2 - interferon (alpha, beta and omega) receptor 2, Stradb - ste20-related kinase adaptor beta, Nfib - nuclear factor i/b, Srf - serum response factor (c-fos serum response element-binding transcription factor), Fnip2 - folliculin interacting protein 2, Nfic - nuclear factor i/c, Ankrd54 - ankyrin repeat domain 54, Tmem161a - transmembrane protein 161a, Bag6 - bcl2-associated …										BP
GO:1902403	signal transduction involved in mitotic DNA integrity checkpoint	0.000196	0.0738	3.87	10149	12	1749	8	[Casp2 - caspase 2, Chek2 - checkpoint kinase 2, Atm - ataxia telangiectasia mutated, Mdm2 - p53 e3 ubiquitin protein ligase, Ppp2r5c - protein phosphatase 2, regulatory subunit b', gamma, Pml - promyelocytic leukemia, Prkdc - protein kinase, dna activated, catalytic polypeptide, Tp53 - tumor protein p53]	BP
GO:1902402	signal transduction involved in mitotic DNA damage checkpoint	0.000196	0.0718	3.87	10149	12	1749	8	[Chek2 - checkpoint kinase 2, Casp2 - caspase 2, Atm - ataxia telangiectasia mutated, Mdm2 - p53 e3 ubiquitin protein ligase, Ppp2r5c - protein phosphatase 2, regulatory subunit b', gamma, Prkdc - protein kinase, dna activated, catalytic polypeptide, Pml - promyelocytic leukemia, Tp53 - tumor protein p53]	BP
GO:0072413	signal transduction involved in mitotic cell cycle checkpoint	0.000196	0.07	3.87	10149	12	1749	8	[Chek2 - checkpoint kinase 2, Casp2 - caspase 2, Atm - ataxia telangiectasia mutated, Mdm2 - p53 e3 ubiquitin protein ligase, Ppp2r5c - protein phosphatase 2, regulatory subunit b', gamma, Prkdc - protein kinase, dna activated, catalytic polypeptide, Pml - promyelocytic leukemia, Tp53 - tumor protein p53]	BP
GO:0010638	positive regulation of organelle organization	0.000201	0.0698	1.38	10149	436	1749	104	[RGD735065 - similar to gi:13385412-like protein splice form i, Arid5a - at rich interactive domain 5a (mrf1 like), Pih1d1 - pih1 domain containing 1, Arrb1 - arrestin, beta 1, Gnl3 - guanine nucleotide binding protein-like 3 (nucleolar), Hip1r - huntingtin interacting protein 1 related, Ddhd1 - ddhd domain containing 1, Cdt1 - chromatin licensing and dna replication factor 1, Kmt2a - lysine (k)-…	BP
GO:0016055	Wnt signaling pathway	0.000205	0.0697	1.77	10149	121	1749	37	[Csnk1e - casein kinase 1, epsilon, Strn - striatin, calmodulin binding protein, Bcl9l - b-cell cll/lymphoma 9-like, Tyro3 - tyro3 protein tyrosine kinase, Rnf138 - ring finger protein 138, e3 ubiquitin protein ligase, Ldb1 - lim domain binding 1, Klhl12 - kelch-like family member 12, Csnk1g3 - casein kinase 1, gamma 3, Tcf7l2 - transcription factor 7-like 2 (t-cell specific, hmg-box), Csnk2b - c…	BP
GO:0009893	positive regulation of metabolic process	0.000236	0.078	1.14	10149	2310	1749	455	[Zfp523 - zinc finger protein 523, Ddr1 - discoidin domain receptor tyrosine kinase 1, RGD735065 - similar to gi:13385412-like protein splice form i, Taf6l - taf6-like rna polymerase ii, p300/cbp-associated factor (pcaf)-associated factor, Creb5 - camp responsive element binding protein 5, Dom3z - dom-3 homolog z (c. elegans), Smad1 - smad family member 1, Rarg - retinoic acid receptor, gamma, At…	BP
GO:0010604	positive regulation of macromolecule metabolic process	0.000259	0.0838	1.15	10149	2152	1749	426	[Zfp523 - zinc finger protein 523, Ddr1 - discoidin domain receptor tyrosine kinase 1, RGD735065 - similar to gi:13385412-like protein splice form i, Taf6l - taf6-like rna polymerase ii, p300/cbp-associated factor (pcaf)-associated factor, Creb5 - camp responsive element binding protein 5, Dom3z - dom-3 homolog z (c. elegans), Rarg - retinoic acid receptor, gamma, Smad1 - smad family member 1, At…	BP
GO:0043543	protein acylation	0.00027	0.0854	1.7	10149	140	1749	41	[Kat8 - k (lysine) acetyltransferase 8, Wdr5 - wd repeat domain 5, Kansl3 - kat8 regulatory nsl complex subunit 3, Taf6l - taf6-like rna polymerase ii, p300/cbp-associated factor (pcaf)-associated factor, Atf2 - activating transcription factor 2, Naa60 - n(alpha)-acetyltransferase 60, natf catalytic subunit, Ldb1 - lim domain binding 1, Zdhhc7 - zinc finger, dhhc-type containing 7, Abhd17a - abhy…	BP
GO:0045944	positive regulation of transcription by RNA polymerase II	0.000318	0.0983	1.27	10149	788	1749	172	[Kat8 - k (lysine) acetyltransferase 8, Zfp523 - zinc finger protein 523, Bcl9l - b-cell cll/lymphoma 9-like, Ppp1r12a - protein phosphatase 1, regulatory subunit 12a, Esrra - estrogen related receptor, alpha, Arid5a - at rich interactive domain 5a (mrf1 like), Creb5 - camp responsive element binding protein 5, Arrb1 - arrestin, beta 1, Irf3 - interferon regulatory factor 3, Lmo7 - lim domain 7, …	BP
GO:0051173	positive regulation of nitrogen compound metabolic process	0.000323	0.0977	1.15	10149	2069	1749	410	[Zfp523 - zinc finger protein 523, Ddr1 - discoidin domain receptor tyrosine kinase 1, RGD735065 - similar to gi:13385412-like protein splice form i, Taf6l - taf6-like rna polymerase ii, p300/cbp-associated factor (pcaf)-associated factor, Creb5 - camp responsive element binding protein 5, Dom3z - dom-3 homolog z (c. elegans), Rarg - retinoic acid receptor, gamma, Smad1 - smad family member 1, At…	BP
GO:0044087	regulation of cellular component biogenesis	0.000326	0.0963	1.3	10149	654	1749	146	[Myo10 - myosin x, Pih1d1 - pih1 domain containing 1, Ehmt2 - euchromatic histone lysine n-methyltransferase 2, Med25 - mediator complex subunit 25, Eln - elastin, Zmynd8 - zinc finger, mynd-type containing 8, Hip1r - huntingtin interacting protein 1 related, Cdt1 - chromatin licensing and dna replication factor 1, Crbn - cereblon, Hey2 - hairy/enhancer-of-split related with yrpw motif 2, Ahr - a…	BP
GO:0006468	protein phosphorylation	0.000336	0.0973	1.33	10149	522	1749	120	[Nf1 - neurofibromin 1, Trio - trio rho guanine nucleotide exchange factor, Ddr1 - discoidin domain receptor tyrosine kinase 1, Srpk1 - srsf protein kinase 1, Tyk2 - tyrosine kinase 2, Stk38 - serine/threonine kinase 38, Dmpk - dystrophia myotonica-protein kinase, Smad1 - smad family member 1, Speg - speg complex locus, Tnk2 - tyrosine kinase, non-receptor, 2, Scyl1 - scy1-like 1 (s. cerevisiae),…	BP
GO:0022402	cell cycle process	0.00034	0.0964	1.31	10149	583	1749	132	[Ppp1r12a - protein phosphatase 1, regulatory subunit 12a, Ehmt2 - euchromatic histone lysine n-methyltransferase 2, Golga2 - golgin a2, Hinfp - histone h4 transcription factor, Ndc1 - ndc1 transmembrane nucleoporin, Mus81 - mus81 structure-specific endonuclease subunit, Camk2g - calcium/calmodulin-dependent protein kinase ii gamma, Aunip - aurora kinase a and ninein interacting protein, Cdt1 - c…	BP
GO:0045935	positive regulation of nucleobase-containing compound metabolic process	0.000342	0.095	1.2	10149	1265	1749	262	[Zfp523 - zinc finger protein 523, Ppp1r12a - protein phosphatase 1, regulatory subunit 12a, Taf6l - taf6-like rna polymerase ii, p300/cbp-associated factor (pcaf)-associated factor, Pih1d1 - pih1 domain containing 1, Creb5 - camp responsive element binding protein 5, Lmo7 - lim domain 7, Irf3 - interferon regulatory factor 3, Dom3z - dom-3 homolog z (c. elegans), Rarg - retinoic acid receptor, g…	BP
GO:0032989	cellular component morphogenesis	0.000343	0.0934	1.44	10149	319	1749	79	[Akip1 - a kinase (prka) interacting protein 1, Ntrk1 - neurotrophic tyrosine kinase, receptor, type 1, Actn1 - actinin, alpha 1, Tbce - tubulin folding cofactor e, Tyro3 - tyro3 protein tyrosine kinase, Dst - dystonin, Dclk1 - doublecortin-like kinase 1, Lrp8 - low density lipoprotein receptor-related protein 8, apolipoprotein e receptor, Mael - maelstrom spermatogenic transposon silencer, Ahr -…	BP
GO:1902017	regulation of cilium assembly	0.000349	0.0933	2.27	10149	46	1749	18	[Evi5l - ecotropic viral integration site 5-like, Fuz - fuzzy planar cell polarity protein, Ift140 - intraflagellar transport 140, Ccp110 - centriolar coiled coil protein 110kda, Crocc - ciliary rootlet coiled-coil, rootletin, Dzip1 - daz interacting zinc finger protein 1, Syne1 - spectrin repeat containing, nuclear envelope 1, Tbc1d7 - tbc1 domain family, member 7, Dnm2 - dynamin 2, Ift88 - intr…	BP
GO:1905114	cell surface receptor signaling pathway involved in cell-cell signaling	0.000353	0.0925	1.73	10149	124	1749	37	[Csnk1e - casein kinase 1, epsilon, Strn - striatin, calmodulin binding protein, Bcl9l - b-cell cll/lymphoma 9-like, Tyro3 - tyro3 protein tyrosine kinase, Rnf138 - ring finger protein 138, e3 ubiquitin protein ligase, Ldb1 - lim domain binding 1, Klhl12 - kelch-like family member 12, Csnk1g3 - casein kinase 1, gamma 3, Tcf7l2 - transcription factor 7-like 2 (t-cell specific, hmg-box), Csnk2b - c…	BP
GO:0006928	movement of cell or subcellular component	0.000364	0.0938	1.29	10149	671	1749	149	[Ddr1 - discoidin domain receptor tyrosine kinase 1, Ift46 - intraflagellar transport 46 homolog (chlamydomonas), Mia3 - melanoma inhibitory activity family, member 3, Unc5b - unc-5 homolog b (c. elegans), Stau1 - staufen double-stranded rna binding protein 1, Dst - dystonin, Arrb2 - arrestin, beta 2, Tns1 - tensin 1, Pard3 - par-3 (partitioning defective 3) homolog (c. elegans), Bicd2 - bicaudal…	BP
GO:0044093	positive regulation of molecular function	0.000413	0.104	1.22	10149	1087	1749	228	[Evi5 - ecotropic viral integration site 5, RGD735065 - similar to gi:13385412-like protein splice form i, Ppp1r12a - protein phosphatase 1, regulatory subunit 12a, Pih1d1 - pih1 domain containing 1, Lrrfip1 - leucine rich repeat (in flii) interacting protein 1, Med25 - mediator complex subunit 25, Tbc1d17 - tbc1 domain family, member 17, Tank - traf family member-associated nfkb activator, Dph3 …	BP
GO:0050789	regulation of biological process	0.000431	0.107	1.06	10149	5920	1749	1083	[Zfp523 - zinc finger protein 523, Eml4 - echinoderm microtubule associated protein like 4, Srpk1 - srsf protein kinase 1, Stk38 - serine/threonine kinase 38, Birc6 - baculoviral iap repeat-containing 6, Unc5b - unc-5 homolog b (c. elegans), Ehmt2 - euchromatic histone lysine n-methyltransferase 2, Creb5 - camp responsive element binding protein 5, Dom3z - dom-3 homolog z (c. elegans), Rarg - ret…	BP
t, Rnf31 - ring finger protein 31, E2f1 - e2f transcription factor 1, Inpp5e - inositol polyphosphate-5-phosphatase e, Dgke - diacylglycerol kinase, epsilon 64kda, Megf8 - multiple egf-like-domains 8, Rad51c - rad51 paralog c, Ppfia1 - protein tyrosine phosphatase, receptor type, f polypeptide (ptprf), interacting protein (liprin), alpha 1, Lrp5 - low density lipoprotein receptor-related protein …										BP
GO:1902115	regulation of organelle assembly	0.000476	0.116	1.63	10149	157	1749	44	[Styxl1 - serine/threonine/tyrosine interacting-like 1, Nprl2 - nitrogen permease regulator-like 2 (s. cerevisiae), Ehmt2 - euchromatic histone lysine n-methyltransferase 2, Fuz - fuzzy planar cell polarity protein, Ift140 - intraflagellar transport 140, Ccp110 - centriolar coiled coil protein 110kda, Crocc - ciliary rootlet coiled-coil, rootletin, Asap1 - arfgap with sh3 domain, ankyrin repeat a…	BP
GO:0043966	histone H3 acetylation	0.000488	0.117	2.42	10149	36	1749	15	[Brpf1 - bromodomain and phd finger containing, 1, Ing5 - inhibitor of growth family, member 5, Wdr5 - wd repeat domain 5, Brd4 - bromodomain containing 4, Taf6l - taf6-like rna polymerase ii, p300/cbp-associated factor (pcaf)-associated factor, Crtc2 - creb regulated transcription coactivator 2, Kat7 - k (lysine) acetyltransferase 7, Kat6a - k(lysine) acetyltransferase 6a, Naa60 - n(alpha)-acety…	BP
GO:1902850	microtubule cytoskeleton organization involved in mitosis	0.000504	0.119	1.91	10149	79	1749	26	[Rcc1 - regulator of chromosome condensation 1, Tbce - tubulin folding cofactor e, Clasp2 - cytoplasmic linker associated protein 2, Tubgcp6 - tubulin, gamma complex associated protein 6, Golga2 - golgin a2, Numa1 - nuclear mitotic apparatus protein 1, Pafah1b1 - platelet-activating factor acetylhydrolase 1b, regulatory subunit 1, Msto1 - misato homolog 1 (drosophila), Tubg1 - tubulin, gamma 1, C…	BP
GO:2001269	positive regulation of cysteine-type endopeptidase activity involved in apoptotic signaling pathway	0.00053	0.123	4.35	10149	8	1749	6	[Lgals9 - lectin, galactoside-binding, soluble, 9, Bax - bcl2-associated x protein, Smad3 - smad family member 3, Tfap4 - transcription factor ap-4, Fas - fas cell surface death receptor, Jak2 - janus kinase 2]	BP
GO:0010628	positive regulation of gene expression	0.000548	0.125	1.19	10149	1285	1749	264	[Zfp523 - zinc finger protein 523, Ppp1r12a - protein phosphatase 1, regulatory subunit 12a, Pih1d1 - pih1 domain containing 1, Creb5 - camp responsive element binding protein 5, Irf3 - interferon regulatory factor 3, Lmo7 - lim domain 7, Rarg - retinoic acid receptor, gamma, Smad1 - smad family member 1, Med25 - mediator complex subunit 25, Atxn7l3 - ataxin 7-like 3, Samd4a - sterile alpha motif…	BP
GO:0051649	establishment of localization in cell	0.000633	0.142	1.22	10149	1031	1749	216	[Evi5 - ecotropic viral integration site 5, Thoc6 - tho complex 6 homolog (drosophila), Mia3 - melanoma inhibitory activity family, member 3, Stau1 - staufen double-stranded rna binding protein 1, Pex19 - peroxisomal biogenesis factor 19, Tbc1d17 - tbc1 domain family, member 17, Ndc1 - ndc1 transmembrane nucleoporin, Vps11 - vacuolar protein sorting 11 homolog (s. cerevisiae), Tbc1d23 - tbc1 doma…	BP
GO:0018022	peptidyl-lysine methylation	0.000666	0.147	2.12	10149	52	1749	19	[Paxip1 - pax interacting (with transcription-activation domain) protein 1, Nsd1 - nuclear receptor binding set domain protein 1, Fam173b - family with sequence similarity 173, member b, Baz2a - bromodomain adjacent to zinc finger domain, 2a, Wdr5 - wd repeat domain 5, Mettl10 - methyltransferase like 10, Ehmt2 - euchromatic histone lysine n-methyltransferase 2, Setd4 - set domain containing 4, A…	BP
GO:0098727	maintenance of cell number	0.000675	0.147	1.81	10149	93	1749	29	[Nipbl - nipped-b homolog (drosophila), Bcl9l - b-cell cll/lymphoma 9-like, Stat3 - signal transducer and activator of transcription 3 (acute-phase response factor), Med14 - mediator complex subunit 14, Fancc - fanconi anemia, complementation group c, Piwil2 - piwi-like rna-mediated gene silencing 2, Gnl3 - guanine nucleotide binding protein-like 3 (nucleolar), Ldb1 - lim domain binding 1, Stag2 …	BP
GO:0030511	positive regulation of transforming growth factor beta receptor signaling pathway	0.000685	0.147	2.78	10149	23	1749	11	[Men1 - multiple endocrine neoplasia i, Tgfb1i1 - transforming growth factor beta 1 induced transcript 1, Stk11 - serine/threonine kinase 11, Dab2 - disabled 2, mitogen-responsive phosphoprotein, Myocd - myocardin, Gipc1 - gipc pdz domain containing family, member 1, Rnf111 - ring finger protein 111, Hipk2 - homeodomain interacting protein kinase 2, Crebbp - creb binding protein, Smad4 - smad fam…	BP
GO:1903846	positive regulation of cellular response to transforming growth factor beta stimulus	0.000685	0.144	2.78	10149	23	1749	11	[Men1 - multiple endocrine neoplasia i, Tgfb1i1 - transforming growth factor beta 1 induced transcript 1, Stk11 - serine/threonine kinase 11, Myocd - myocardin, Dab2 - disabled 2, mitogen-responsive phosphoprotein, Gipc1 - gipc pdz domain containing family, member 1, Rnf111 - ring finger protein 111, Hipk2 - homeodomain interacting protein kinase 2, Crebbp - creb binding protein, Smad4 - smad fam…	BP
GO:0006357	regulation of transcription by RNA polymerase II	0.000743	0.154	1.19	10149	1275	1749	261	[Zfp523 - zinc finger protein 523, Ppp1r12a - protein phosphatase 1, regulatory subunit 12a, Tcerg1 - transcription elongation regulator 1, Lrrfip1 - leucine rich repeat (in flii) interacting protein 1, Ehmt2 - euchromatic histone lysine n-methyltransferase 2, Creb5 - camp responsive element binding protein 5, Lmo7 - lim domain 7, Irf3 - interferon regulatory factor 3, Rarg - retinoic acid recept…	BP
GO:0016569	covalent chromatin modification	0.000755	0.154	1.44	10149	283	1749	70	[Nsd1 - nuclear receptor binding set domain protein 1, Kat8 - k (lysine) acetyltransferase 8, Kansl3 - kat8 regulatory nsl complex subunit 3, Taf6l - taf6-like rna polymerase ii, p300/cbp-associated factor (pcaf)-associated factor, Bap1 - brca1 associated protein-1 (ubiquitin carboxy-terminal hydrolase), Ehmt2 - euchromatic histone lysine n-methyltransferase 2, Atf2 - activating transcription fac…	BP
GO:0051304	chromosome separation	0.000771	0.155	3.69	10149	11	1749	7	[Recql5 - recq protein-like 5, Ttk - ttk protein kinase, Ncaph2 - non-smc condensin ii complex, subunit h2, Espl1 - extra spindle pole bodies homolog 1 (s. cerevisiae), Ncapd3 - non-smc condensin ii complex, subunit d3, Dis3l2 - dis3 mitotic control homolog (s. cerevisiae)-like 2, Ncapd2 - non-smc condensin i complex, subunit d2]	BP
GO:0051668	localization within membrane	0.000804	0.16	1.88	10149	77	1749	25	[Synj2bp - synaptojanin 2 binding protein, Cep112 - centrosomal protein 112kda, Synj1 - synaptojanin 1, Ift122 - intraflagellar transport 122 homolog (chlamydomonas), Mia3 - melanoma inhibitory activity family, member 3, Itgb1bp1 - integrin beta 1 binding protein 1, Ap2m1 - adaptor-related protein complex 2, mu 1 subunit, Ndc1 - ndc1 transmembrane nucleoporin, Sec24b - sec24 family, member b (s. …	BP
GO:0033554	cellular response to stress	0.000869	0.17	1.2	10149	1117	1749	231	[Ehmt2 - euchromatic histone lysine n-methyltransferase 2, Stau1 - staufen double-stranded rna binding protein 1, Ankzf1 - ankyrin repeat and zinc finger domain containing 1, Slc38a2 - solute carrier family 38, member 2, Tank - traf family member-associated nfkb activator, Eln - elastin, Nhej1 - nonhomologous end-joining factor 1, Aunip - aurora kinase a and ninein interacting protein, Szt2 - sei…	BP
GO:0006974	cellular response to DNA damage stimulus	0.000873	0.169	1.31	10149	514	1749	116	[Tank - traf family member-associated nfkb activator, Nhej1 - nonhomologous end-joining factor 1, Hinfp - histone h4 transcription factor, Mus81 - mus81 structure-specific endonuclease subunit, Aunip - aurora kinase a and ninein interacting protein, Usp28 - ubiquitin specific peptidase 28, Gins2 - gins complex subunit 2 (psf2 homolog), E2f1 - e2f transcription factor 1, Pms2 - postmeiotic segrega…	BP
GO:0002051	osteoblast fate commitment	0.000879	0.167	5.8	10149	4	1749	4	[Men1 - multiple endocrine neoplasia i, Runx2 - runt-related transcription factor 2, Smad1 - smad family member 1, Smad5 - smad family member 5]	BP
GO:0018393	internal peptidyl-lysine acetylation	0.000988	0.186	1.77	10149	95	1749	29	[Kat8 - k (lysine) acetyltransferase 8, Wdr5 - wd repeat domain 5, Kansl3 - kat8 regulatory nsl complex subunit 3, Taf6l - taf6-like rna polymerase ii, p300/cbp-associated factor (pcaf)-associated factor, Atf2 - activating transcription factor 2, Naa60 - n(alpha)-acetyltransferase 60, natf catalytic subunit, Ldb1 - lim domain binding 1, Brpf3 - bromodomain and phd finger containing, 3, Brd1 - bro…	BP
