# Supplementary material for: Identification of RBPMS as a mammalian smooth muscle master splicing regulator via proximity of its gene with super-enhancers
Source: eLife. 2019 Jul 8;8:e46327. doi: 10.7554/eLife.46327 (PMC6613909; doi:10.7554/eLife.46327)
Supplement: Supplementary file 5. [file elife-46327-supp5.xlsx]

## Sheet: Summary
GO terms significantly enriched in genes differentially abundant (padj < 0.05 and log2FC > 1 or < -1)
GO term, description, p-value, FDR q-value, enrichment, total number of genes (N), genes associated with a particular GO term (B), number of genes in the target set (n), number of genes from n found in a particular GO term (b), gene names, GO term category (biological process, BP, molecular function, MF, and cellular component, CC). GO analysis was carried out using Gorilla as described in Method…
Samples
T	Rat aorta tissue
P9	Rat aorta Passage 9
D Ctr	Control Differentiated PAC1
D KD	RBPMS KD in Differentiated PAC1
P Ctr	Control Proliferative PAC1 (minus Dox)
P OE	RBPMSA overexpression Proliferative PAC1 (plus Dox)
Comparisons
(T vs P9)	Rat aorta dedifferentiation
(D Ctr vs P Ctr)	PAC1 dedifferentiation
(D KD vs D Ctr)	RBPMS knockdown in PAC1 cells
(P OE vs P Ctr)	RBPMS overexpression in PAC1 cells

## Sheet: T vs P9
GO.Term	Description	P.value	FDR.q.value	Enrichment	N	B	n	b	Genes	Category	Regulation
GO:0044459	plasma membrane part	9.89e-50	1.81e-46	1.71	9959	1230	2546	537	[Fgf13 - fibroblast growth factor 13, Rom1 - retinal outer segment membrane protein 1, Kcnq4 - potassium voltage-gated channel, kqt-like subfamily, member 4, Mfsd2a - major facilitator superfamily domain containing 2a, Cxcr4 - chemokine (c-x-c motif) receptor 4, Slc15a2 - solute carrier family 15 (oligopeptide transporter), member 2, Adcyap1r1 - adenylate cyclase activating polypeptide 1 receptor…	CC	DOWN
GO:0031226	intrinsic component of plasma membrane	5.18e-41	4.75e-38	2.15	9959	436	2546	240	[Rom1 - retinal outer segment membrane protein 1, Ntng2 - netrin g2, Mfsd2a - major facilitator superfamily domain containing 2a, Slc15a2 - solute carrier family 15 (oligopeptide transporter), member 2, Ror1 - receptor tyrosine kinase-like orphan receptor 1, Trpc4 - transient receptor potential cation channel, subfamily c, member 4, Nlgn3 - neuroligin 3, Fcgr2b - fc fragment of igg, low affinity …	CC	DOWN
GO:0005887	integral component of plasma membrane	1.75e-39	1.07e-36	2.19	9959	394	2546	221	[Rom1 - retinal outer segment membrane protein 1, Mfsd2a - major facilitator superfamily domain containing 2a, Slc15a2 - solute carrier family 15 (oligopeptide transporter), member 2, Ror1 - receptor tyrosine kinase-like orphan receptor 1, Trpc4 - transient receptor potential cation channel, subfamily c, member 4, Nlgn3 - neuroligin 3, Fcgr2b - fc fragment of igg, low affinity iib, receptor (cd32…	CC	DOWN
GO:0031224	intrinsic component of membrane	1.4e-33	6.43e-31	1.4	9959	2195	2546	784	[Mfsd2a - major facilitator superfamily domain containing 2a, Cxcr4 - chemokine (c-x-c motif) receptor 4, Slc15a2 - solute carrier family 15 (oligopeptide transporter), member 2, Adcyap1r1 - adenylate cyclase activating polypeptide 1 receptor 1, Nlgn3 - neuroligin 3, Rnf19b - ring finger protein 19b, Syt11 - synaptotagmin xi, Agtr2 - angiotensin ii receptor, type 2, Trpm4 - transient receptor pot…	CC	DOWN
nel, voltage-dependent, t type, alpha 1h subunit, Cybrd1 - cytochrome b reductase 1, Ccrl2 - chemokine (c-c motif) receptor-like 2, Cd302 - cd302 molecule, Creb3l2 - camp responsive element binding protein 3-like 2, Ptpro - protein tyrosine phosphatase, receptor type, o, Pde3a - phosphodiesterase 3a, cgmp inhibited, Lrrc66 - leucine rich repeat containing 66, Ptpre - protein tyrosine phosphatase,…										CC	DOWN
GO:0044421	extracellular region part	1.96e-32	7.19e-30	1.77	9959	711	2546	322	[Cbln2 - cerebellin 2 precursor, Vwf - von willebrand factor, Pi16 - peptidase inhibitor 16, Ntng2 - netrin g2, Scube3 - signal peptide, cub domain, egf-like 3, Abi3bp - abi family, member 3 (nesh) binding protein, Gdf10 - growth differentiation factor 10, Il1rn - interleukin 1 receptor antagonist, Pi15 - peptidase inhibitor 15, Vit - vitrin, Col4a3 - collagen, type iv, alpha 3, Adamtsl2 - adamts…	CC	DOWN
GO:0016021	integral component of membrane	3.94e-31	1.2e-28	1.39	9959	2129	2546	756	[Rom1 - retinal outer segment membrane protein 1, Zdhhc23 - zinc finger, dhhc-type containing 23, Cxcr4 - chemokine (c-x-c motif) receptor 4, Mfsd2a - major facilitator superfamily domain containing 2a, Slc15a2 - solute carrier family 15 (oligopeptide transporter), member 2, Rnf103 - ring finger protein 103, Adcyap1r1 - adenylate cyclase activating polypeptide 1 receptor 1, Fmo3 - flavin containi…	CC	DOWN
nsporter), member 28, Gpr37 - g protein-coupled receptor 37, Fcer1g - fc fragment of ige, high affinity i, receptor for; gamma polypeptide, P2ry6 - pyrimidinergic receptor p2y, g-protein coupled, 6, LOC100911402 - cell cycle exit and neuronal differentiation protein 1-like, Cdh6 - cadherin 6, Sspn - sarcospan, Gpr21 - g protein-coupled receptor 21, Cacna1e - calcium channel, voltage-dependent, r …										CC	DOWN
GO:0005615	extracellular space	1.58e-30	4.12e-28	1.88	9959	528	2546	254	[Cbln2 - cerebellin 2 precursor, Vwf - von willebrand factor, Pi16 - peptidase inhibitor 16, Scube3 - signal peptide, cub domain, egf-like 3, Gdf10 - growth differentiation factor 10, Il1rn - interleukin 1 receptor antagonist, Pi15 - peptidase inhibitor 15, Col4a3 - collagen, type iv, alpha 3, Vit - vitrin, Creg1 - cellular repressor of e1a-stimulated genes 1, Ecm1 - extracellular matrix protein …	CC	DOWN
GO:1902495	transmembrane transporter complex	1.41e-25	3.24e-23	2.74	9959	124	2546	87	[Ptk2b - protein tyrosine kinase 2 beta, Synj2bp - synaptojanin 2 binding protein, Kcnq4 - potassium voltage-gated channel, kqt-like subfamily, member 4, Cacna1h - calcium channel, voltage-dependent, t type, alpha 1h subunit, Fxyd1 - fxyd domain-containing ion transport regulator 1, Scn7a - sodium channel, voltage-gated, type vii, alpha, Vwc2 - von willebrand factor c domain containing 2, Vamp2 -…	CC	DOWN
GO:0044425	membrane part	5.3e-25	1.08e-22	1.26	9959	3168	2546	1021	[Kcnq4 - potassium voltage-gated channel, kqt-like subfamily, member 4, Cxcr4 - chemokine (c-x-c motif) receptor 4, Mfsd2a - major facilitator superfamily domain containing 2a, Slc15a2 - solute carrier family 15 (oligopeptide transporter), member 2, Adcyap1r1 - adenylate cyclase activating polypeptide 1 receptor 1, Nlgn3 - neuroligin 3, Syt11 - synaptotagmin xi, Rnf19b - ring finger protein 19b, …	CC	DOWN
sferase 1a, liver, Vkorc1 - vitamin k epoxide reductase complex, subunit 1, Thbd - thrombomodulin, Itgal - integrin, alpha l, Kcnma1 - potassium large conductance calcium-activated channel, subfamily m, alpha member 1, Vasn - vasorin, LOC308990 - hypothetical protein loc308990, Cadps - ca++-dependent secretion activator, Sectm1b - secreted and transmembrane 1b, Mfsd4 - major facilitator superfami…										CC	DOWN
GO:0034703	cation channel complex	8.89e-24	1.63e-21	2.9	9959	97	2546	72	[Ptk2b - protein tyrosine kinase 2 beta, Kcnq4 - potassium voltage-gated channel, kqt-like subfamily, member 4, Cacna1h - calcium channel, voltage-dependent, t type, alpha 1h subunit, Scn7a - sodium channel, voltage-gated, type vii, alpha, Vwc2 - von willebrand factor c domain containing 2, Vamp2 - vesicle-associated membrane protein 2, Trpc4 - transient receptor potential cation channel, subfami…	CC	DOWN
GO:1990351	transporter complex	2.53e-23	4.21e-21	2.62	9959	130	2546	87	[Ptk2b - protein tyrosine kinase 2 beta, Synj2bp - synaptojanin 2 binding protein, Kcnq4 - potassium voltage-gated channel, kqt-like subfamily, member 4, Cacna1h - calcium channel, voltage-dependent, t type, alpha 1h subunit, Fxyd1 - fxyd domain-containing ion transport regulator 1, Scn7a - sodium channel, voltage-gated, type vii, alpha, Vwc2 - von willebrand factor c domain containing 2, Vamp2 -…	CC	DOWN
GO:0034702	ion channel complex	3.13e-23	4.78e-21	2.72	9959	115	2546	80	[Ptk2b - protein tyrosine kinase 2 beta, Synj2bp - synaptojanin 2 binding protein, Kcnq4 - potassium voltage-gated channel, kqt-like subfamily, member 4, Cacna1h - calcium channel, voltage-dependent, t type, alpha 1h subunit, Scn7a - sodium channel, voltage-gated, type vii, alpha, Vwc2 - von willebrand factor c domain containing 2, Vamp2 - vesicle-associated membrane protein 2, Trpc4 - transient …	CC	DOWN
GO:0098797	plasma membrane protein complex	1.75e-22	2.47e-20	2.05	9959	283	2546	148	[Synj2bp - synaptojanin 2 binding protein, Kcnq4 - potassium voltage-gated channel, kqt-like subfamily, member 4, Ncf4 - neutrophil cytosolic factor 4, Gnal - guanine nucleotide binding protein, alpha stimulating, olfactory type, Hip1r - huntingtin interacting protein 1 related, Vcam1 - vascular cell adhesion molecule 1, Cntn2 - contactin 2 (axonal), Itgb3 - integrin, beta 3, Gnai1 - guanine nucl…	CC	DOWN
GO:0005886	plasma membrane	5.53e-21	7.23e-19	1.37	9959	1673	2546	584	[Fgf13 - fibroblast growth factor 13, Plekhh2 - pleckstrin homology domain containing, family h (with myth4 domain) member 2, Kcnq4 - potassium voltage-gated channel, kqt-like subfamily, member 4, Scube3 - signal peptide, cub domain, egf-like 3, Cxcr4 - chemokine (c-x-c motif) receptor 4, Hsd17b8 - hydroxysteroid (17-beta) dehydrogenase 8, Trpc4 - transient receptor potential cation channel, subf…	CC	DOWN
GO:0031012	extracellular matrix	1.07e-20	1.3e-18	2.17	9959	211	2546	117	[Vwf - von willebrand factor, Abi3bp - abi family, member 3 (nesh) binding protein, Scara3 - scavenger receptor class a, member 3, Vit - vitrin, Col4a3 - collagen, type iv, alpha 3, Timp3 - timp metallopeptidase inhibitor 3, Adamtsl2 - adamts-like 2, Ecm1 - extracellular matrix protein 1, Zp2 - zona pellucida glycoprotein 2 (sperm receptor), Lrrc3b - leucine rich repeat containing 3b, Timp4 - tis…	CC	DOWN
GO:0005576	extracellular region	3.19e-18	3.66e-16	1.97	9959	260	2546	131	[Fgf13 - fibroblast growth factor 13, Vwf - von willebrand factor, Apold1 - apolipoprotein l domain containing 1, C1s - complement component 1, s subcomponent, Il1rn - interleukin 1 receptor antagonist, Nrros - negative regulator of reactive oxygen species, Cxcl14 - chemokine (c-x-c motif) ligand 14, Eva1c - eva-1 homolog c, Fgf16 - fibroblast growth factor 16, Adamtsl2 - adamts-like 2, Zp2 - zon…	CC	DOWN
GO:0034705	potassium channel complex	7.59e-14	8.18e-12	3.17	9959	42	2546	34	[Kcnh2 - potassium voltage-gated channel, subfamily h (eag-related), member 2, Kcnq4 - potassium voltage-gated channel, kqt-like subfamily, member 4, Kcna6 - potassium voltage gated channel, shaker related subfamily, member 6, Kcnb1 - potassium voltage gated channel, shab-related subfamily, member 1, Kcnab1 - potassium voltage-gated channel, shaker-related subfamily, beta member 1, Lrrc38 - leuci…	CC	DOWN
GO:0009986	cell surface	8.25e-14	8.39e-12	1.7	9959	352	2546	153	[Synj2bp - synaptojanin 2 binding protein, Ppfia4 - protein tyrosine phosphatase, receptor type, f polypeptide (ptprf), interacting protein (liprin), alpha 4, C5ar1 - complement component 5a receptor 1, Cxcr4 - chemokine (c-x-c motif) receptor 4, Scube3 - signal peptide, cub domain, egf-like 3, Ngfr - nerve growth factor receptor, Ptprj - protein tyrosine phosphatase, receptor type, j, Adcyap1r1 …	CC	DOWN
GO:0098590	plasma membrane region	1.01e-13	9.7e-12	1.52	9959	593	2546	231	[Rom1 - retinal outer segment membrane protein 1, Kcnq4 - potassium voltage-gated channel, kqt-like subfamily, member 4, Diaph1 - diaphanous-related formin 1, Ptprj - protein tyrosine phosphatase, receptor type, j, Adcyap1r1 - adenylate cyclase activating polypeptide 1 receptor 1, Trpc4 - transient receptor potential cation channel, subfamily c, member 4, Ntrk2 - neurotrophic tyrosine kinase, rec…	CC	DOWN
GO:0099240	intrinsic component of synaptic membrane	1.47e-13	1.34e-11	2.37	9959	99	2546	60	[Cacna1h - calcium channel, voltage-dependent, t type, alpha 1h subunit, Cadm3 - cell adhesion molecule 3, Ntng2 - netrin g2, Slc6a7 - solute carrier family 6 (neurotransmitter transporter), member 7, Efnb3 - ephrin b3, Nlgn3 - neuroligin 3, Ptpro - protein tyrosine phosphatase, receptor type, o, Syt11 - synaptotagmin xi, Cntn2 - contactin 2 (axonal), Itgb3 - integrin, beta 3, Grik5 - glutamate r…	CC	DOWN
GO:0099699	integral component of synaptic membrane	1.52e-13	1.33e-11	2.49	9959	85	2546	54	[Cadm3 - cell adhesion molecule 3, Cacna1h - calcium channel, voltage-dependent, t type, alpha 1h subunit, Slc6a7 - solute carrier family 6 (neurotransmitter transporter), member 7, Efnb3 - ephrin b3, Nlgn3 - neuroligin 3, Ptpro - protein tyrosine phosphatase, receptor type, o, Syt11 - synaptotagmin xi, Itgb3 - integrin, beta 3, Grik5 - glutamate receptor, ionotropic, kainate 5, Prrt2 - proline-r…	CC	DOWN
GO:0044449	contractile fiber part	9.7e-13	8.08e-11	2.08	9959	145	2546	77	[Jph2 - junctophilin 2, Trim63 - tripartite motif containing 63, e3 ubiquitin protein ligase, Ppp1r12a - protein phosphatase 1, regulatory subunit 12a, Hrc - histidine rich calcium binding protein, Nos1 - nitric oxide synthase 1, neuronal, Svil - supervillin, Dst - dystonin, Tnnc1 - troponin c type 1 (slow), Tmod4 - tropomodulin 4, Nexn - nexilin (f actin binding protein), S100a1 - s100 calcium b…	CC	DOWN
GO:0008076	voltage-gated potassium channel complex	6.88e-12	5.48e-10	3.15	9959	36	2546	29	[Kcnh2 - potassium voltage-gated channel, subfamily h (eag-related), member 2, Kcnq4 - potassium voltage-gated channel, kqt-like subfamily, member 4, Kcnb1 - potassium voltage gated channel, shab-related subfamily, member 1, Kcna6 - potassium voltage gated channel, shaker related subfamily, member 6, Kcnab1 - potassium voltage-gated channel, shaker-related subfamily, beta member 1, Lrrc38 - leuci…	CC	DOWN
GO:0009897	external side of plasma membrane	9.25e-12	7.06e-10	2.01	9959	150	2546	77	[Vwf - von willebrand factor, Cxcr4 - chemokine (c-x-c motif) receptor 4, Ghr - growth hormone receptor, Ngfr - nerve growth factor receptor, Ccrl2 - chemokine (c-c motif) receptor-like 2, Lag3 - lymphocyte-activation gene 3, Scube1 - signal peptide, cub domain, egf-like 1, Ache - acetylcholinesterase, Fcgr2b - fc fragment of igg, low affinity iib, receptor (cd32), Cd83 - cd83 molecule, Vcam1 - v…	CC	DOWN
GO:0043235	receptor complex	2.31e-11	1.7e-09	1.88	9959	185	2546	89	[Ptk2b - protein tyrosine kinase 2 beta, Synj2bp - synaptojanin 2 binding protein, Ramp1 - receptor (g protein-coupled) activity modifying protein 1, Plxnb1 - plexin b1, Acvrl1 - activin a receptor type ii-like 1, Ghr - growth hormone receptor, Adcyap1r1 - adenylate cyclase activating polypeptide 1 receptor 1, Npr1 - natriuretic peptide receptor a/guanylate cyclase a (atrionatriuretic peptide rec…	CC	DOWN
GO:0030018	Z disc	2.61e-11	1.84e-09	2.27	9959	93	2546	54	[Jph2 - junctophilin 2, Trim63 - tripartite motif containing 63, e3 ubiquitin protein ligase, Ppp1r12a - protein phosphatase 1, regulatory subunit 12a, Hrc - histidine rich calcium binding protein, Nos1 - nitric oxide synthase 1, neuronal, Dst - dystonin, Nexn - nexilin (f actin binding protein), S100a1 - s100 calcium binding protein a1, Ank3 - ankyrin 3, node of ranvier (ankyrin g), Obsl1 - obsc…	CC	DOWN
GO:0062023	collagen-containing extracellular matrix	5.98e-11	4.06e-09	2.03	9959	133	2546	69	[Vwf - von willebrand factor, Ltbp3 - latent transforming growth factor beta binding protein 3, Gpc3 - glypican 3, Col15a1 - collagen, type xv, alpha 1, Col4a1 - collagen, type iv, alpha 1, Abi3bp - abi family, member 3 (nesh) binding protein, Col7a1 - collagen, type vii, alpha 1, Nav2 - neuron navigator 2, Ache - acetylcholinesterase, Vwc2 - von willebrand factor c domain containing 2, Fbln1 - f…	CC	DOWN
GO:0098936	intrinsic component of postsynaptic membrane	9.23e-11	6.04e-09	2.42	9959	71	2546	44	[Cacna1h - calcium channel, voltage-dependent, t type, alpha 1h subunit, Slc16a3 - solute carrier family 16 (monocarboxylate transporter), member 3, Slc16a7 - solute carrier family 16 (monocarboxylate transporter), member 7, Lrrc4b - leucine rich repeat containing 4b, Efnb3 - ephrin b3, Prrt1 - proline-rich transmembrane protein 1, Nlgn3 - neuroligin 3, Pcdh17 - protocadherin 17, Ptpro - protein …	CC	DOWN
GO:0099055	integral component of postsynaptic membrane	2.82e-10	1.78e-08	2.5	9959	61	2546	39	[Cacna1h - calcium channel, voltage-dependent, t type, alpha 1h subunit, Slc16a3 - solute carrier family 16 (monocarboxylate transporter), member 3, Slc16a7 - solute carrier family 16 (monocarboxylate transporter), member 7, Lrrc4b - leucine rich repeat containing 4b, Efnb3 - ephrin b3, Prrt1 - proline-rich transmembrane protein 1, Nlgn3 - neuroligin 3, Pcdh17 - protocadherin 17, Ptpro - protein …	CC	DOWN
GO:0042383	sarcolemma	2.83e-10	1.73e-08	2.12	9959	105	2546	57	[Adcy5 - adenylate cyclase 5, Aqp1 - aquaporin 1, Cacna1h - calcium channel, voltage-dependent, t type, alpha 1h subunit, Nos3 - nitric oxide synthase 3, endothelial cell, Popdc2 - popeye domain containing 2, Nos1 - nitric oxide synthase 1, neuronal, Fxyd1 - fxyd domain-containing ion transport regulator 1, Pde9a - phosphodiesterase 9a, Alox12 - arachidonate 12-lipoxygenase, Dst - dystonin, Vcam1…	CC	DOWN
GO:0016529	sarcoplasmic reticulum	6.04e-09	3.57e-07	2.88	9959	34	2546	25	[Jph2 - junctophilin 2, Nos1 - nitric oxide synthase 1, neuronal, Pygm - phosphorylase, glycogen, muscle, Akap7 - a kinase (prka) anchor protein 7, Casq1 - calsequestrin 1 (fast-twitch, skeletal muscle), S100a1 - s100 calcium binding protein a1, Sgcd - sarcoglycan, delta (dystrophin-associated glycoprotein), Slc2a4 - solute carrier family 2 (facilitated glucose transporter), member 4, Ank3 - anky…	CC	DOWN
GO:0099056	integral component of presynaptic membrane	1.66e-08	9.5e-07	2.55	9959	46	2546	30	[Cadm3 - cell adhesion molecule 3, Cacna1h - calcium channel, voltage-dependent, t type, alpha 1h subunit, Slc6a7 - solute carrier family 6 (neurotransmitter transporter), member 7, Efnb3 - ephrin b3, Atp2b3 - atpase, ca++ transporting, plasma membrane 3, Pcdh17 - protocadherin 17, P2ry2 - purinergic receptor p2y, g-protein coupled, 2, Syt11 - synaptotagmin xi, Ptprd - protein tyrosine phosphatas…	CC	DOWN
GO:0030054	cell junction	2.86e-08	1.59e-06	1.38	9959	607	2546	214	[Fgf13 - fibroblast growth factor 13, Rasip1 - ras interacting protein 1, Cxcr4 - chemokine (c-x-c motif) receptor 4, Ptprj - protein tyrosine phosphatase, receptor type, j, Adcyap1r1 - adenylate cyclase activating polypeptide 1 receptor 1, Sv2c - synaptic vesicle glycoprotein 2c, Ptpru - protein tyrosine phosphatase, receptor type, u, Trpc4 - transient receptor potential cation channel, subfamil…	CC	DOWN
GO:0016020	membrane	3.04e-08	1.64e-06	1.13	9959	3240	2546	940	[Plekhh2 - pleckstrin homology domain containing, family h (with myth4 domain) member 2, Kcnq4 - potassium voltage-gated channel, kqt-like subfamily, member 4, Acadm - acyl-coa dehydrogenase, c-4 to c-12 straight chain, Cxcr4 - chemokine (c-x-c motif) receptor 4, Slc15a2 - solute carrier family 15 (oligopeptide transporter), member 2, Peli2 - pellino e3 ubiquitin protein ligase family member 2, A…	CC	DOWN
solute carrier family 7 (cationic amino acid transporter, y+ system), member 3, Slc1a3 - solute carrier family 1 (glial high affinity glutamate transporter), member 3, Cpne5 - copine v, Cx3cl1 - chemokine (c-x3-c motif) ligand 1, Tie1 - tyrosine kinase with immunoglobulin-like and egf-like domains 1, Angpt2 - angiopoietin 2, Aoc3 - amine oxidase, copper containing 3, Gna15 - guanine nucleotide bi…										CC	DOWN
GO:0098889	intrinsic component of presynaptic membrane	3.43e-08	1.8e-06	2.39	9959	54	2546	33	[Cadm3 - cell adhesion molecule 3, Cacna1h - calcium channel, voltage-dependent, t type, alpha 1h subunit, Ntng2 - netrin g2, Slc6a7 - solute carrier family 6 (neurotransmitter transporter), member 7, Efnb3 - ephrin b3, Atp2b3 - atpase, ca++ transporting, plasma membrane 3, Pcdh17 - protocadherin 17, P2ry2 - purinergic receptor p2y, g-protein coupled, 2, Syt11 - synaptotagmin xi, Ptprd - protein …	CC	DOWN
GO:0043292	contractile fiber	5.27e-08	2.68e-06	2.55	9959	43	2546	28	[Cdk5r1 - cyclin-dependent kinase 5, regulatory subunit 1 (p35), Trim63 - tripartite motif containing 63, e3 ubiquitin protein ligase, Dmd - dystrophin, Des - desmin, Ppp1r12a - protein phosphatase 1, regulatory subunit 12a, Asph - aspartate-beta-hydroxylase, Hspb1 - heat shock protein 1, Tmod4 - tropomodulin 4, Tnnc1 - troponin c type 1 (slow), Pde4dip - phosphodiesterase 4d interacting protein,…	CC	DOWN
GO:0005891	voltage-gated calcium channel complex	9.96e-08	4.93e-06	3.45	9959	17	2546	15	[Cacna1h - calcium channel, voltage-dependent, t type, alpha 1h subunit, Cacng7 - calcium channel, voltage-dependent, gamma subunit 7, Cacna1g - calcium channel, voltage-dependent, t type, alpha 1g subunit, Cacna1e - calcium channel, voltage-dependent, r type, alpha 1e subunit, Hspa2 - heat shock protein 2, Cacnb4 - calcium channel, voltage-dependent, beta 4 subunit, Cacna2d1 - calcium channel, v…	CC	DOWN
GO:0098552	side of membrane	4.86e-07	2.34e-05	1.62	9959	203	2546	84	[Vwf - von willebrand factor, Mapt - microtubule-associated protein tau, Ghr - growth hormone receptor, Cxcr4 - chemokine (c-x-c motif) receptor 4, Ngfr - nerve growth factor receptor, Ccrl2 - chemokine (c-c motif) receptor-like 2, Dst - dystonin, Lag3 - lymphocyte-activation gene 3, Scube1 - signal peptide, cub domain, egf-like 1, Ache - acetylcholinesterase, Cd83 - cd83 molecule, Fcgr2b - fc fr…	CC	DOWN
GO:0097458	neuron part	6.63e-07	3.12e-05	1.23	9959	1189	2546	374	[Cdk5r1 - cyclin-dependent kinase 5, regulatory subunit 1 (p35), Fgf13 - fibroblast growth factor 13, Rom1 - retinal outer segment membrane protein 1, Kcnq4 - potassium voltage-gated channel, kqt-like subfamily, member 4, Acadm - acyl-coa dehydrogenase, c-4 to c-12 straight chain, Ntng2 - netrin g2, Plcb4 - phospholipase c, beta 4, Diaph1 - diaphanous-related formin 1, Cxcr4 - chemokine (c-x-c mo…	CC	DOWN
GO:0043005	neuron projection	8.54e-07	3.91e-05	1.3	9959	748	2546	248	[Fgf13 - fibroblast growth factor 13, Cdk5r1 - cyclin-dependent kinase 5, regulatory subunit 1 (p35), Kcnq4 - potassium voltage-gated channel, kqt-like subfamily, member 4, Acadm - acyl-coa dehydrogenase, c-4 to c-12 straight chain, Ntng2 - netrin g2, Plcb4 - phospholipase c, beta 4, Diaph1 - diaphanous-related formin 1, Adcyap1r1 - adenylate cyclase activating polypeptide 1 receptor 1, Sv2c - sy…	CC	DOWN
GO:0033017	sarcoplasmic reticulum membrane	1.67e-06	7.46e-05	2.98	9959	21	2546	16	[Dhrs7c - dehydrogenase/reductase (sdr family) member 7c, Jph2 - junctophilin 2, Hrc - histidine rich calcium binding protein, Asph - aspartate-beta-hydroxylase, Ryr2 - ryanodine receptor 2, cardiac, Nos1 - nitric oxide synthase 1, neuronal, Atp2a2 - atpase, ca++ transporting, cardiac muscle, slow twitch 2, Ryr3 - ryanodine receptor 3, Jph1 - junctophilin 1, Casq1 - calsequestrin 1 (fast-twitch, …	CC	DOWN
GO:0120025	plasma membrane bounded cell projection	2.11e-06	9.19e-05	1.24	9959	1030	2546	326	[Cdk5r1 - cyclin-dependent kinase 5, regulatory subunit 1 (p35), Fgf13 - fibroblast growth factor 13, Plekhh2 - pleckstrin homology domain containing, family h (with myth4 domain) member 2, Kcnq4 - potassium voltage-gated channel, kqt-like subfamily, member 4, Acadm - acyl-coa dehydrogenase, c-4 to c-12 straight chain, Plcb4 - phospholipase c, beta 4, Ntng2 - netrin g2, Diaph1 - diaphanous-relate…	CC	DOWN
GO:0042995	cell projection	2.3e-06	9.78e-05	1.23	9959	1070	2546	337	[Cdk5r1 - cyclin-dependent kinase 5, regulatory subunit 1 (p35), Fgf13 - fibroblast growth factor 13, Plekhh2 - pleckstrin homology domain containing, family h (with myth4 domain) member 2, Kcnq4 - potassium voltage-gated channel, kqt-like subfamily, member 4, Acadm - acyl-coa dehydrogenase, c-4 to c-12 straight chain, Ntng2 - netrin g2, Plcb4 - phospholipase c, beta 4, Diaph1 - diaphanous-relate…	CC	DOWN
GO:0045202	synapse	2.36e-06	9.82e-05	1.32	9959	598	2546	202	[Cdk5r1 - cyclin-dependent kinase 5, regulatory subunit 1 (p35), Cbln2 - cerebellin 2 precursor, Plcb4 - phospholipase c, beta 4, Ntng2 - netrin g2, Ppp2r1b - protein phosphatase 2, regulatory subunit a, beta, Nr3c2 - nuclear receptor subfamily 3, group c, member 2, Nlgn3 - neuroligin 3, Samd4a - sterile alpha motif domain containing 4a, Ntrk2 - neurotrophic tyrosine kinase, receptor, type 2, Syt…	CC	DOWN
GO:0099060	integral component of postsynaptic specialization membrane	3.06e-06	0.000125	2.65	9959	28	2546	19	[Erbb4 - v-erb-b2 avian erythroblastic leukemia viral oncogene 4, Adra2a - adrenoceptor alpha 2a, Cacng7 - calcium channel, voltage-dependent, gamma subunit 7, Slc16a3 - solute carrier family 16 (monocarboxylate transporter), member 3, Slc16a7 - solute carrier family 16 (monocarboxylate transporter), member 7, Nlgn1 - neuroligin 1, Lrrc4b - leucine rich repeat containing 4b, Efnb3 - ephrin b3, Nl…	CC	DOWN
GO:0098802	plasma membrane receptor complex	3.58e-06	0.000143	1.91	9959	84	2546	41	[Ptk2b - protein tyrosine kinase 2 beta, Synj2bp - synaptojanin 2 binding protein, Ramp1 - receptor (g protein-coupled) activity modifying protein 1, Itga7 - integrin, alpha 7, Acvrl1 - activin a receptor type ii-like 1, Birc2 - baculoviral iap repeat-containing 2, Itgax - integrin, alpha x, Itga10 - integrin, alpha 10, Vwc2 - von willebrand factor c domain containing 2, Porcn - porcupine homolog…	CC	DOWN
GO:0030016	myofibril	4.38e-06	0.000171	2.49	9959	33	2546	21	[Tpm1 - tropomyosin 1, alpha, Dmd - dystrophin, Des - desmin, Lmod1 - leiomodin 1 (smooth muscle), Abra - actin-binding rho activating protein, Asph - aspartate-beta-hydroxylase, Hspb1 - heat shock protein 1, Tmod4 - tropomodulin 4, Neb - nebulin, Pde4dip - phosphodiesterase 4d interacting protein, Casq1 - calsequestrin 1 (fast-twitch, skeletal muscle), Myh7 - myosin, heavy chain 7, cardiac muscl…	CC	DOWN
GO:0034704	calcium channel complex	5.47e-06	0.000209	2.52	9959	31	2546	20	[Cacna1h - calcium channel, voltage-dependent, t type, alpha 1h subunit, Cacng7 - calcium channel, voltage-dependent, gamma subunit 7, Ryr2 - ryanodine receptor 2, cardiac, Cacna1g - calcium channel, voltage-dependent, t type, alpha 1g subunit, Cacna1e - calcium channel, voltage-dependent, r type, alpha 1e subunit, Hspa2 - heat shock protein 2, Ryr3 - ryanodine receptor 3, Trpc4 - transient recep…	CC	DOWN
GO:0098948	intrinsic component of postsynaptic specialization membrane	8.71e-06	0.000326	2.42	9959	34	2546	21	[Erbb4 - v-erb-b2 avian erythroblastic leukemia viral oncogene 4, Adra2a - adrenoceptor alpha 2a, Cacng7 - calcium channel, voltage-dependent, gamma subunit 7, Mpp2 - membrane protein, palmitoylated 2 (maguk p55 subfamily member 2), Slc16a3 - solute carrier family 16 (monocarboxylate transporter), member 3, Dlg2 - discs, large homolog 2 (drosophila), Slc16a7 - solute carrier family 16 (monocarbox…	CC	DOWN
GO:0044456	synapse part	8.83e-06	0.000323	1.28	9959	671	2546	220	[Cdk5r1 - cyclin-dependent kinase 5, regulatory subunit 1 (p35), Ntng2 - netrin g2, Plcb4 - phospholipase c, beta 4, Nr3c2 - nuclear receptor subfamily 3, group c, member 2, Ror1 - receptor tyrosine kinase-like orphan receptor 1, Sv2c - synaptic vesicle glycoprotein 2c, Nlgn3 - neuroligin 3, Nr1d1 - nuclear receptor subfamily 1, group d, member 1, Fcgr2b - fc fragment of igg, low affinity iib, re…	CC	DOWN
GO:0043204	perikaryon	1.27e-05	0.000455	1.79	9959	96	2546	44	[Cacna1h - calcium channel, voltage-dependent, t type, alpha 1h subunit, Naip6 - nlr family, apoptosis inhibitory protein 6, Kcnb1 - potassium voltage gated channel, shab-related subfamily, member 1, Nos1 - nitric oxide synthase 1, neuronal, Ngfr - nerve growth factor receptor, Pde9a - phosphodiesterase 9a, Nell2 - nel-like 2 (chicken), Kng1 - kininogen 1, Hspb1 - heat shock protein 1, Kcnab1 - p…	CC	DOWN
GO:0005604	basement membrane	1.85e-05	0.000652	1.93	9959	69	2546	34	[Agrn - agrin, Lama4 - laminin, alpha 4, Col15a1 - collagen, type xv, alpha 1, Vwa1 - von willebrand factor a domain containing 1, Col4a1 - collagen, type iv, alpha 1, Col7a1 - collagen, type vii, alpha 1, Thbs2 - thrombospondin 2, Ache - acetylcholinesterase, Vwc2 - von willebrand factor c domain containing 2, Fbln1 - fibulin 1, Hmcn2 - hemicentin 2, Sparc - secreted protein, acidic, cysteine-ri…	CC	DOWN
GO:0031256	leading edge membrane	2.59e-05	0.000894	1.72	9959	107	2546	47	[Ptprk - protein tyrosine phosphatase, receptor type, k, Kank1 - kn motif and ankyrin repeat domains 1, Epb4.1l5 - erythrocyte membrane protein band 4.1 like 5, Kcnb1 - potassium voltage gated channel, shab-related subfamily, member 1, Diaph1 - diaphanous-related formin 1, Mapt - microtubule-associated protein tau, Ngfr - nerve growth factor receptor, Pde9a - phosphodiesterase 9a, Plekho1 - pleck…	CC	DOWN
GO:0016323	basolateral plasma membrane	2.73e-05	0.000925	1.66	9959	125	2546	53	[Aqp1 - aquaporin 1, Synj2bp - synaptojanin 2 binding protein, Epcam - epithelial cell adhesion molecule, C5ar1 - complement component 5a receptor 1, Trpc4 - transient receptor potential cation channel, subfamily c, member 4, Slc1a3 - solute carrier family 1 (glial high affinity glutamate transporter), member 3, Dstyk - dual serine/threonine and tyrosine protein kinase, Dlg3 - discs, large homolo…	CC	DOWN
GO:0097060	synaptic membrane	3.87e-05	0.00129	1.56	9959	160	2546	64	[Synj2bp - synaptojanin 2 binding protein, Grip2 - glutamate receptor interacting protein 2, Ache - acetylcholinesterase, Ntrk2 - neurotrophic tyrosine kinase, receptor, type 2, Syt11 - synaptotagmin xi, Dlg3 - discs, large homolog 3 (drosophila), Trpv1 - transient receptor potential cation channel, subfamily v, member 1, Ank3 - ankyrin 3, node of ranvier (ankyrin g), Grik5 - glutamate receptor, …	CC	DOWN
GO:0099061	integral component of postsynaptic density membrane	7.07e-05	0.00231	2.55	9959	23	2546	15	[Erbb4 - v-erb-b2 avian erythroblastic leukemia viral oncogene 4, Cacng7 - calcium channel, voltage-dependent, gamma subunit 7, Adra2a - adrenoceptor alpha 2a, Slc16a3 - solute carrier family 16 (monocarboxylate transporter), member 3, Slc16a7 - solute carrier family 16 (monocarboxylate transporter), member 7, Efnb3 - ephrin b3, Lrrc4b - leucine rich repeat containing 4b, Ptpro - protein tyrosine…	CC	DOWN
GO:0098651	basement membrane collagen trimer	7.09e-05	0.00228	3.91	9959	7	2546	7	[Col4a3 - collagen, type iv, alpha 3, Col4a1 - collagen, type iv, alpha 1, Col4a4 - collagen, type iv, alpha 4, Col4a2 - collagen, type iv, alpha 2, Col18a1 - collagen, type xviii, alpha 1, Col4a6 - collagen, type iv, alpha 6, Col4a5 - collagen, type iv, alpha 5]	CC	DOWN
GO:0005911	cell-cell junction	8.62e-05	0.00272	1.4	9959	280	2546	100	[Fgf13 - fibroblast growth factor 13, Magi2 - membrane associated guanylate kinase, ww and pdz domain containing 2, Rasip1 - ras interacting protein 1, Cxcr4 - chemokine (c-x-c motif) receptor 4, Ngfr - nerve growth factor receptor, Ptprj - protein tyrosine phosphatase, receptor type, j, Dst - dystonin, Adcyap1r1 - adenylate cyclase activating polypeptide 1 receptor 1, Ptpru - protein tyrosine ph…	CC	DOWN
GO:0031253	cell projection membrane	0.0001	0.00311	1.5	9959	177	2546	68	[Rom1 - retinal outer segment membrane protein 1, Aqp1 - aquaporin 1, Epb4.1l5 - erythrocyte membrane protein band 4.1 like 5, Diaph1 - diaphanous-related formin 1, Cybrd1 - cytochrome b reductase 1, Mapt - microtubule-associated protein tau, Ngfr - nerve growth factor receptor, Pde9a - phosphodiesterase 9a, Ptprj - protein tyrosine phosphatase, receptor type, j, Cdkl5 - cyclin-dependent kinase-l…	CC	DOWN
GO:0005581	collagen trimer	0.000111	0.00339	2.1	9959	41	2546	22	[C1qb - complement component 1, q subcomponent, b chain, Col15a1 - collagen, type xv, alpha 1, Col4a1 - collagen, type iv, alpha 1, Col9a1 - collagen, type ix, alpha 1, C1qtnf2 - c1q and tumor necrosis factor related protein 2, C1qa - complement component 1, q subcomponent, a chain, Fcn1 - ficolin (collagen/fibrinogen domain containing) 1, C1qc - complement component 1, q subcomponent, c chain, C…	CC	DOWN
GO:0034706	sodium channel complex	0.000126	0.00378	3.48	9959	9	2546	8	[Scn3b - sodium channel, voltage-gated, type iii, beta, Scn1b - sodium channel, voltage-gated, type i, beta, Trpm4 - transient receptor potential cation channel, subfamily m, member 4, Grik5 - glutamate receptor, ionotropic, kainate 5, Scnn1a - sodium channel, nonvoltage-gated 1 alpha, Scn7a - sodium channel, voltage-gated, type vii, alpha, Scn3a - sodium channel, voltage-gated, type iii, alpha, …	CC	DOWN
GO:0098978	glutamatergic synapse	0.000135	0.00398	1.36	9959	323	2546	112	[Magi2 - membrane associated guanylate kinase, ww and pdz domain containing 2, Cbln2 - cerebellin 2 precursor, Ppfia3 - protein tyrosine phosphatase, receptor type, f polypeptide (ptprf), interacting protein (liprin), alpha 3, Plcb4 - phospholipase c, beta 4, Ntng2 - netrin g2, Nos1 - nitric oxide synthase 1, neuronal, Ppp2r1b - protein phosphatase 2, regulatory subunit a, beta, Nr3c2 - nuclear r…	CC	DOWN
GO:0008328	ionotropic glutamate receptor complex	0.000144	0.00419	2.44	9959	24	2546	15	[Ptk2b - protein tyrosine kinase 2 beta, Synj2bp - synaptojanin 2 binding protein, Cacng7 - calcium channel, voltage-dependent, gamma subunit 7, Olfm2 - olfactomedin 2, Dlg2 - discs, large homolog 2 (drosophila), Nlgn1 - neuroligin 1, Vwc2 - von willebrand factor c domain containing 2, Porcn - porcupine homolog (drosophila), Dlg3 - discs, large homolog 3 (drosophila), Olfm1 - olfactomedin 1, Grik…	CC	DOWN
GO:0098878	neurotransmitter receptor complex	0.000144	0.00412	2.44	9959	24	2546	15	[Ptk2b - protein tyrosine kinase 2 beta, Synj2bp - synaptojanin 2 binding protein, Cacng7 - calcium channel, voltage-dependent, gamma subunit 7, Olfm2 - olfactomedin 2, Dlg2 - discs, large homolog 2 (drosophila), Nlgn1 - neuroligin 1, Vwc2 - von willebrand factor c domain containing 2, Porcn - porcupine homolog (drosophila), Dlg3 - discs, large homolog 3 (drosophila), Grik5 - glutamate receptor, …	CC	DOWN
GO:0045121	membrane raft	0.000155	0.00438	1.4	9959	254	2546	91	[Ptk2b - protein tyrosine kinase 2 beta, Aqp1 - aquaporin 1, Adcy5 - adenylate cyclase 5, Ptgis - prostaglandin i2 (prostacyclin) synthase, Cacna1h - calcium channel, voltage-dependent, t type, alpha 1h subunit, Nos3 - nitric oxide synthase 3, endothelial cell, Mapt - microtubule-associated protein tau, Fxyd1 - fxyd domain-containing ion transport regulator 1, Prkcz - protein kinase c, zeta, Nos1…	CC	DOWN
GO:0099146	intrinsic component of postsynaptic density membrane	0.00016	0.00445	2.29	9959	29	2546	17	[Erbb4 - v-erb-b2 avian erythroblastic leukemia viral oncogene 4, Adra2a - adrenoceptor alpha 2a, Cacng7 - calcium channel, voltage-dependent, gamma subunit 7, Mpp2 - membrane protein, palmitoylated 2 (maguk p55 subfamily member 2), Slc16a3 - solute carrier family 16 (monocarboxylate transporter), member 3, Dlg2 - discs, large homolog 2 (drosophila), Slc16a7 - solute carrier family 16 (monocarbox…	CC	DOWN
GO:0098857	membrane microdomain	0.000182	0.00498	1.4	9959	255	2546	91	[Aqp1 - aquaporin 1, Ptk2b - protein tyrosine kinase 2 beta, Adcy5 - adenylate cyclase 5, Ptgis - prostaglandin i2 (prostacyclin) synthase, Cacna1h - calcium channel, voltage-dependent, t type, alpha 1h subunit, Nos3 - nitric oxide synthase 3, endothelial cell, Mapt - microtubule-associated protein tau, Prkcz - protein kinase c, zeta, Fxyd1 - fxyd domain-containing ion transport regulator 1, Nos1…	CC	DOWN
GO:0030017	sarcomere	0.000212	0.00572	2.2	9959	32	2546	18	[Timp4 - tissue inhibitor of metalloproteinase 4, Myom1 - myomesin 1, Abra - actin-binding rho activating protein, Lmod1 - leiomodin 1 (smooth muscle), Ryr2 - ryanodine receptor 2, cardiac, Abcc9 - atp-binding cassette, subfamily c (cftr/mrp), member 9, Fhod3 - formin homology 2 domain containing 3, Actc1 - actin, alpha, cardiac muscle 1, Syne1 - spectrin repeat containing, nuclear envelope 1, Ob…	CC	DOWN
GO:0044297	cell body	0.000221	0.00585	1.29	9959	429	2546	142	[Cdk5r1 - cyclin-dependent kinase 5, regulatory subunit 1 (p35), Siah2 - siah e3 ubiquitin protein ligase 2, Boc - boc cell adhesion associated, oncogene regulated, Nlgn3 - neuroligin 3, Nr1d1 - nuclear receptor subfamily 1, group d, member 1, Rbp1 - retinol binding protein 1, cellular, Fcgr2b - fc fragment of igg, low affinity iib, receptor (cd32), Ntrk2 - neurotrophic tyrosine kinase, receptor,…	CC	DOWN
GO:0016324	apical plasma membrane	0.000274	0.00717	1.49	9959	163	2546	62	[Aqp1 - aquaporin 1, Epcam - epithelial cell adhesion molecule, Prkcz - protein kinase c, zeta, Fxyd1 - fxyd domain-containing ion transport regulator 1, Bst2 - bone marrow stromal cell antigen 2, Akap7 - a kinase (prka) anchor protein 7, Fam65b - family with sequence similarity 65, member b, Hip1r - huntingtin interacting protein 1 related, Ptpro - protein tyrosine phosphatase, receptor type, o,…	CC	DOWN
GO:0030315	T-tubule	0.000276	0.00712	2	9959	43	2546	22	[Kcnj12 - potassium inwardly-rectifying channel, subfamily j, member 12, Stac - sh3 and cysteine rich domain, Scn1b - sodium channel, voltage-gated, type i, beta, Ank2 - ankyrin 2, neuronal, Stbd1 - starch binding domain 1, Nos1 - nitric oxide synthase 1, neuronal, Fxyd1 - fxyd domain-containing ion transport regulator 1, Abcc9 - atp-binding cassette, subfamily c (cftr/mrp), member 9, Atp2b4 - at…	CC	DOWN
GO:0030314	junctional membrane complex	0.000278	0.00707	3.91	9959	6	2546	6	[Trdn - triadin, Jph2 - junctophilin 2, Jph3 - junctophilin 3, Casq2 - calsequestrin 2 (cardiac muscle), Ryr3 - ryanodine receptor 3, Jph1 - junctophilin 1]	CC	DOWN
GO:0098642	network-forming collagen trimer	0.000278	0.00698	3.91	9959	6	2546	6	[Col4a3 - collagen, type iv, alpha 3, Col4a1 - collagen, type iv, alpha 1, Col4a4 - collagen, type iv, alpha 4, Col4a2 - collagen, type iv, alpha 2, Col4a6 - collagen, type iv, alpha 6, Col4a5 - collagen, type iv, alpha 5]	CC	DOWN
GO:0005587	collagen type IV trimer	0.000278	0.00688	3.91	9959	6	2546	6	[Col4a1 - collagen, type iv, alpha 1, Col4a3 - collagen, type iv, alpha 3, Col4a4 - collagen, type iv, alpha 4, Col4a2 - collagen, type iv, alpha 2, Col4a6 - collagen, type iv, alpha 6, Col4a5 - collagen, type iv, alpha 5]	CC	DOWN
GO:0098589	membrane region	0.000304	0.00742	1.37	9959	265	2546	93	[Ptk2b - protein tyrosine kinase 2 beta, Aqp1 - aquaporin 1, Adcy5 - adenylate cyclase 5, Ptgis - prostaglandin i2 (prostacyclin) synthase, Cacna1h - calcium channel, voltage-dependent, t type, alpha 1h subunit, Nos3 - nitric oxide synthase 3, endothelial cell, Mapt - microtubule-associated protein tau, Fxyd1 - fxyd domain-containing ion transport regulator 1, Prkcz - protein kinase c, zeta, Nos1…	CC	DOWN
GO:0120038	plasma membrane bounded cell projection part	0.000306	0.00737	1.19	9959	918	2546	279	[Cdk5r1 - cyclin-dependent kinase 5, regulatory subunit 1 (p35), Fgf13 - fibroblast growth factor 13, Rom1 - retinal outer segment membrane protein 1, Plcb4 - phospholipase c, beta 4, Diaph1 - diaphanous-related formin 1, Cxcr4 - chemokine (c-x-c motif) receptor 4, Ptprj - protein tyrosine phosphatase, receptor type, j, Ror1 - receptor tyrosine kinase-like orphan receptor 1, Nlgn3 - neuroligin 3,…	CC	DOWN
GO:0044463	cell projection part	0.000306	0.00728	1.19	9959	918	2546	279	[Cdk5r1 - cyclin-dependent kinase 5, regulatory subunit 1 (p35), Fgf13 - fibroblast growth factor 13, Rom1 - retinal outer segment membrane protein 1, Plcb4 - phospholipase c, beta 4, Diaph1 - diaphanous-related formin 1, Cxcr4 - chemokine (c-x-c motif) receptor 4, Ptprj - protein tyrosine phosphatase, receptor type, j, Ror1 - receptor tyrosine kinase-like orphan receptor 1, Nlgn3 - neuroligin 3,…	CC	DOWN
GO:0098945	intrinsic component of presynaptic active zone membrane	0.000349	0.00819	2.69	9959	16	2546	11	[P2ry2 - purinergic receptor p2y, g-protein coupled, 2, Kcnma1 - potassium large conductance calcium-activated channel, subfamily m, alpha member 1, Syt11 - synaptotagmin xi, Cacna1h - calcium channel, voltage-dependent, t type, alpha 1h subunit, Cacna2d1 - calcium channel, voltage-dependent, alpha2/delta subunit 1, Adra2a - adrenoceptor alpha 2a, Ntng2 - netrin g2, Nrxn1 - neurexin 1, P2rx1 - pu…	CC	DOWN
GO:0031594	neuromuscular junction	0.000469	0.0109	1.77	9959	64	2546	29	[Cdk5r1 - cyclin-dependent kinase 5, regulatory subunit 1 (p35), Itga7 - integrin, alpha 7, Synj2bp - synaptojanin 2 binding protein, Lama4 - laminin, alpha 4, Apbb1 - amyloid beta (a4) precursor protein-binding, family b, member 1 (fe65), Des - desmin, Ppp1r9a - protein phosphatase 1, regulatory subunit 9a, Ache - acetylcholinesterase, Kcnn3 - potassium intermediate/small conductance calcium-act…	CC	DOWN
GO:0098839	postsynaptic density membrane	0.000487	0.0112	3.13	9959	10	2546	8	[Synj2bp - synaptojanin 2 binding protein, Dlg3 - discs, large homolog 3 (drosophila), Cacng7 - calcium channel, voltage-dependent, gamma subunit 7, Hspb1 - heat shock protein 1, Arc - activity-regulated cytoskeleton-associated protein, Dlg2 - discs, large homolog 2 (drosophila), Gria1 - glutamate receptor, ionotropic, ampa 1, Iqsec2 - iq motif and sec7 domain 2]	CC	DOWN
GO:0005865	striated muscle thin filament	0.000487	0.011	3.13	9959	10	2546	8	[Myom1 - myomesin 1, Obsl1 - obscurin-like 1, Tmod4 - tropomodulin 4, Tmod2 - tropomodulin 2, Fhod3 - formin homology 2 domain containing 3, Tmod1 - tropomodulin 1, Myom3 - myomesin 3, Mybpc2 - myosin binding protein c, fast-type]	CC	DOWN
GO:0043025	neuronal cell body	0.000621	0.0139	1.3	9959	362	2546	120	[Cdk5r1 - cyclin-dependent kinase 5, regulatory subunit 1 (p35), Siah2 - siah e3 ubiquitin protein ligase 2, Boc - boc cell adhesion associated, oncogene regulated, Nlgn3 - neuroligin 3, Nr1d1 - nuclear receptor subfamily 1, group d, member 1, Ntrk2 - neurotrophic tyrosine kinase, receptor, type 2, Trpm4 - transient receptor potential cation channel, subfamily m, member 4, Trpm2 - transient recep…	CC	DOWN
GO:0045211	postsynaptic membrane	0.000664	0.0147	1.62	9959	92	2546	38	[Dmd - dystrophin, Apbb1 - amyloid beta (a4) precursor protein-binding, family b, member 1 (fe65), Kcnb1 - potassium voltage gated channel, shab-related subfamily, member 1, Camk2n1 - calcium/calmodulin-dependent protein kinase ii inhibitor 1, Nrgn - neurogranin, Cadps2 - ca++-dependent secretion activator 2, Grip2 - glutamate receptor interacting protein 2, Lin7b - lin-7 homolog b (c. elegans), …	CC	DOWN
GO:0098982	GABA-ergic synapse	0.000678	0.0148	1.87	9959	48	2546	23	[Magi2 - membrane associated guanylate kinase, ww and pdz domain containing 2, Erbb4 - v-erb-b2 avian erythroblastic leukemia viral oncogene 4, Adra2a - adrenoceptor alpha 2a, Iqsec3 - iq motif and sec7 domain 3, Cacna1e - calcium channel, voltage-dependent, r type, alpha 1e subunit, Gucy1a3 - guanylate cyclase 1, soluble, alpha 3, Plcb1 - phospholipase c, beta 1 (phosphoinositide-specific), Nr3c…	CC	DOWN
GO:0032809	neuronal cell body membrane	0.000953	0.0205	2.61	9959	15	2546	10	[Cx3cr1 - chemokine (c-x3-c motif) receptor 1, Aqp1 - aquaporin 1, Insr - insulin receptor, Il6r - interleukin 6 receptor, Kcnb1 - potassium voltage gated channel, shab-related subfamily, member 1, Ngfr - nerve growth factor receptor, Slc6a2 - solute carrier family 6 (neurotransmitter transporter), member 2, Kcna2 - potassium voltage-gated channel, shaker-related subfamily, member 2, Amigo1 - adh…	CC	DOWN
GO:0038023	signaling receptor activity	2.87e-29	1.12e-25	2.11	9959	334	2546	180	[C5ar1 - complement component 5a receptor 1, Cxcr4 - chemokine (c-x-c motif) receptor 4, Gpr83 - g protein-coupled receptor 83, Ngfr - nerve growth factor receptor, P2rx5 - purinergic receptor p2x, ligand-gated ion channel, 5, Il13ra1 - interleukin 13 receptor, alpha 1, Adcyap1r1 - adenylate cyclase activating polypeptide 1 receptor 1, Lag3 - lymphocyte-activation gene 3, Npr1 - natriuretic pepti…	MF	DOWN
GO:0004888	transmembrane signaling receptor activity	4.42e-29	8.59e-26	2.31	9959	244	2546	144	[C5ar1 - complement component 5a receptor 1, Cxcr4 - chemokine (c-x-c motif) receptor 4, Ngfr - nerve growth factor receptor, Gpr83 - g protein-coupled receptor 83, P2rx5 - purinergic receptor p2x, ligand-gated ion channel, 5, Adcyap1r1 - adenylate cyclase activating polypeptide 1 receptor 1, Il13ra1 - interleukin 13 receptor, alpha 1, Lag3 - lymphocyte-activation gene 3, Ror1 - receptor tyrosine…	MF	DOWN
GO:0060089	molecular transducer activity	1.18e-24	1.53e-21	1.95	9959	371	2546	185	[C5ar1 - complement component 5a receptor 1, Cxcr4 - chemokine (c-x-c motif) receptor 4, Gpr83 - g protein-coupled receptor 83, Ngfr - nerve growth factor receptor, P2rx5 - purinergic receptor p2x, ligand-gated ion channel, 5, Adcyap1r1 - adenylate cyclase activating polypeptide 1 receptor 1, Il13ra1 - interleukin 13 receptor, alpha 1, Lag3 - lymphocyte-activation gene 3, Npr1 - natriuretic pepti…	MF	DOWN
GO:0005261	cation channel activity	3e-23	2.91e-20	2.63	9959	128	2546	86	[Jph2 - junctophilin 2, Jph3 - junctophilin 3, Aqp1 - aquaporin 1, Ptk2b - protein tyrosine kinase 2 beta, Kcnq4 - potassium voltage-gated channel, kqt-like subfamily, member 4, Cacna1h - calcium channel, voltage-dependent, t type, alpha 1h subunit, Scn7a - sodium channel, voltage-gated, type vii, alpha, P2rx5 - purinergic receptor p2x, ligand-gated ion channel, 5, Trpc4 - transient receptor pote…	MF	DOWN
GO:0022839	ion gated channel activity	3.13e-23	2.43e-20	2.72	9959	115	2546	80	[Jph2 - junctophilin 2, Aqp1 - aquaporin 1, Jph3 - junctophilin 3, Ptk2b - protein tyrosine kinase 2 beta, Kcnq4 - potassium voltage-gated channel, kqt-like subfamily, member 4, Cacna1h - calcium channel, voltage-dependent, t type, alpha 1h subunit, Scn7a - sodium channel, voltage-gated, type vii, alpha, P2rx5 - purinergic receptor p2x, ligand-gated ion channel, 5, Trpv1 - transient receptor pote…	MF	DOWN
GO:0022838	substrate-specific channel activity	6.97e-22	4.52e-19	2.46	9959	148	2546	93	[Jph2 - junctophilin 2, Jph3 - junctophilin 3, Aqp1 - aquaporin 1, Ptk2b - protein tyrosine kinase 2 beta, Kcnq4 - potassium voltage-gated channel, kqt-like subfamily, member 4, Cacna1h - calcium channel, voltage-dependent, t type, alpha 1h subunit, Scn7a - sodium channel, voltage-gated, type vii, alpha, P2rx5 - purinergic receptor p2x, ligand-gated ion channel, 5, Trpc4 - transient receptor pote…	MF	DOWN
GO:0022836	gated channel activity	8.2e-22	4.55e-19	2.62	9959	121	2546	81	[Jph2 - junctophilin 2, Jph3 - junctophilin 3, Aqp1 - aquaporin 1, Ptk2b - protein tyrosine kinase 2 beta, Kcnq4 - potassium voltage-gated channel, kqt-like subfamily, member 4, Cacna1h - calcium channel, voltage-dependent, t type, alpha 1h subunit, Scn7a - sodium channel, voltage-gated, type vii, alpha, P2rx5 - purinergic receptor p2x, ligand-gated ion channel, 5, Trpv1 - transient receptor pote…	MF	DOWN
GO:0005216	ion channel activity	4.41e-21	2.14e-18	2.44	9959	146	2546	91	[Jph2 - junctophilin 2, Jph3 - junctophilin 3, Aqp1 - aquaporin 1, Ptk2b - protein tyrosine kinase 2 beta, Kcnq4 - potassium voltage-gated channel, kqt-like subfamily, member 4, Cacna1h - calcium channel, voltage-dependent, t type, alpha 1h subunit, Scn7a - sodium channel, voltage-gated, type vii, alpha, P2rx5 - purinergic receptor p2x, ligand-gated ion channel, 5, Trpc4 - transient receptor pote…	MF	DOWN
GO:0004930	G protein-coupled receptor activity	9.94e-21	4.3e-18	2.74	9959	100	2546	70	[Agtr1b - angiotensin ii receptor, type 1b, Ramp1 - receptor (g protein-coupled) activity modifying protein 1, C5ar1 - complement component 5a receptor 1, Cxcr4 - chemokine (c-x-c motif) receptor 4, Gpr83 - g protein-coupled receptor 83, Vom2r44 - vomeronasal 2 receptor 44, Ccrl2 - chemokine (c-c motif) receptor-like 2, Adcyap1r1 - adenylate cyclase activating polypeptide 1 receptor 1, Gpr4 - g p…	MF	DOWN
GO:0022803	passive transmembrane transporter activity	2.03e-20	7.91e-18	2.32	9959	165	2546	98	[Jph2 - junctophilin 2, Kcnq4 - potassium voltage-gated channel, kqt-like subfamily, member 4, P2rx5 - purinergic receptor p2x, ligand-gated ion channel, 5, Trpc4 - transient receptor potential cation channel, subfamily c, member 4, Trpm4 - transient receptor potential cation channel, subfamily m, member 4, Trpm2 - transient receptor potential cation channel, subfamily m, member 2, Kcng1 - potass…	MF	DOWN
GO:0015267	channel activity	2.03e-20	7.19e-18	2.32	9959	165	2546	98	[Jph2 - junctophilin 2, Kcnq4 - potassium voltage-gated channel, kqt-like subfamily, member 4, P2rx5 - purinergic receptor p2x, ligand-gated ion channel, 5, Trpc4 - transient receptor potential cation channel, subfamily c, member 4, Trpm4 - transient receptor potential cation channel, subfamily m, member 4, Trpm2 - transient receptor potential cation channel, subfamily m, member 2, Kcng1 - potass…	MF	DOWN
GO:0046873	metal ion transmembrane transporter activity	3.42e-20	1.11e-17	2.21	9959	193	2546	109	[Jph2 - junctophilin 2, Kcnq4 - potassium voltage-gated channel, kqt-like subfamily, member 4, Nipal2 - nipa-like domain containing 2, Trpc4 - transient receptor potential cation channel, subfamily c, member 4, Trpm4 - transient receptor potential cation channel, subfamily m, member 4, Trpm2 - transient receptor potential cation channel, subfamily m, member 2, Kcng1 - potassium voltage-gated chan…	MF	DOWN
GO:0005267	potassium channel activity	5.72e-18	1.71e-15	3.29	9959	50	2546	42	[Aqp1 - aquaporin 1, Kcnh2 - potassium voltage-gated channel, subfamily h (eag-related), member 2, Kcnq4 - potassium voltage-gated channel, kqt-like subfamily, member 4, Kcnb1 - potassium voltage gated channel, shab-related subfamily, member 1, Kcna6 - potassium voltage gated channel, shaker related subfamily, member 6, Trpm5 - transient receptor potential cation channel, subfamily m, member 5, K…	MF	DOWN
GO:0022832	voltage-gated channel activity	3.05e-17	8.47e-15	2.77	9959	79	2546	56	[Ptk2b - protein tyrosine kinase 2 beta, Kcnq4 - potassium voltage-gated channel, kqt-like subfamily, member 4, Cacna1h - calcium channel, voltage-dependent, t type, alpha 1h subunit, Scn7a - sodium channel, voltage-gated, type vii, alpha, Nalcn - sodium leak channel, non-selective, Kcng1 - potassium voltage-gated channel, subfamily g, member 1, Cacnb1 - calcium channel, voltage-dependent, beta 1…	MF	DOWN
GO:0005244	voltage-gated ion channel activity	3.05e-17	7.91e-15	2.77	9959	79	2546	56	[Ptk2b - protein tyrosine kinase 2 beta, Kcnq4 - potassium voltage-gated channel, kqt-like subfamily, member 4, Cacna1h - calcium channel, voltage-dependent, t type, alpha 1h subunit, Scn7a - sodium channel, voltage-gated, type vii, alpha, Nalcn - sodium leak channel, non-selective, Kcng1 - potassium voltage-gated channel, subfamily g, member 1, Cacnb1 - calcium channel, voltage-dependent, beta 1…	MF	DOWN
GO:0015318	inorganic molecular entity transmembrane transporter activity	2.14e-16	5.2e-14	1.78	9959	350	2546	159	[Jph2 - junctophilin 2, Kcnq4 - potassium voltage-gated channel, kqt-like subfamily, member 4, Mfsd2a - major facilitator superfamily domain containing 2a, Slc15a2 - solute carrier family 15 (oligopeptide transporter), member 2, Nipal2 - nipa-like domain containing 2, Atp5i - atp synthase, h+ transporting, mitochondrial fo complex, subunit e, P2rx5 - purinergic receptor p2x, ligand-gated ion chan…	MF	DOWN
GO:0022843	voltage-gated cation channel activity	3.8e-16	8.69e-14	3.06	9959	55	2546	43	[Ptk2b - protein tyrosine kinase 2 beta, Kcnh2 - potassium voltage-gated channel, subfamily h (eag-related), member 2, Kcnq4 - potassium voltage-gated channel, kqt-like subfamily, member 4, Cacna1h - calcium channel, voltage-dependent, t type, alpha 1h subunit, Kcnb1 - potassium voltage gated channel, shab-related subfamily, member 1, Kcna6 - potassium voltage gated channel, shaker related subfam…	MF	DOWN
GO:0005509	calcium ion binding	6.81e-16	1.47e-13	1.8	9959	319	2546	147	[Cdk5r1 - cyclin-dependent kinase 5, regulatory subunit 1 (p35), Plcb4 - phospholipase c, beta 4, Scube3 - signal peptide, cub domain, egf-like 3, Hrc - histidine rich calcium binding protein, Asph - aspartate-beta-hydroxylase, C1s - complement component 1, s subcomponent, Dst - dystonin, Tnnc1 - troponin c type 1 (slow), Ncald - neurocalcin delta, LOC100911692 - ef-hand calcium-binding domain-co…	MF	DOWN
GO:0022890	inorganic cation transmembrane transporter activity	1.01e-15	2.07e-13	1.87	9959	272	2546	130	[Jph2 - junctophilin 2, Kcnq4 - potassium voltage-gated channel, kqt-like subfamily, member 4, Slc15a2 - solute carrier family 15 (oligopeptide transporter), member 2, Nipal2 - nipa-like domain containing 2, Atp5i - atp synthase, h+ transporting, mitochondrial fo complex, subunit e, P2rx5 - purinergic receptor p2x, ligand-gated ion channel, 5, Trpc4 - transient receptor potential cation channel, …	MF	DOWN
GO:0015079	potassium ion transmembrane transporter activity	1.1e-15	2.14e-13	2.84	9959	66	2546	48	[Aqp1 - aquaporin 1, Kcnh2 - potassium voltage-gated channel, subfamily h (eag-related), member 2, Kcnq4 - potassium voltage-gated channel, kqt-like subfamily, member 4, Trpm5 - transient receptor potential cation channel, subfamily m, member 5, Kcna6 - potassium voltage gated channel, shaker related subfamily, member 6, Kcnb1 - potassium voltage gated channel, shab-related subfamily, member 1, K…	MF	DOWN
GO:0005249	voltage-gated potassium channel activity	1.56e-15	2.89e-13	3.66	9959	31	2546	29	[Kcnh2 - potassium voltage-gated channel, subfamily h (eag-related), member 2, Kcnq4 - potassium voltage-gated channel, kqt-like subfamily, member 4, Kcnb1 - potassium voltage gated channel, shab-related subfamily, member 1, Kcna6 - potassium voltage gated channel, shaker related subfamily, member 6, Kcnab1 - potassium voltage-gated channel, shaker-related subfamily, beta member 1, Lrrc38 - leuci…	MF	DOWN
GO:0008324	cation transmembrane transporter activity	1.68e-15	2.98e-13	1.82	9959	296	2546	138	[Jph2 - junctophilin 2, Kcnq4 - potassium voltage-gated channel, kqt-like subfamily, member 4, Slc15a2 - solute carrier family 15 (oligopeptide transporter), member 2, Nipal2 - nipa-like domain containing 2, Atp5i - atp synthase, h+ transporting, mitochondrial fo complex, subunit e, P2rx5 - purinergic receptor p2x, ligand-gated ion channel, 5, Trpc4 - transient receptor potential cation channel, …	MF	DOWN
GO:0015075	ion transmembrane transporter activity	2.88e-14	4.86e-12	1.68	9959	384	2546	165	[Jph2 - junctophilin 2, Kcnq4 - potassium voltage-gated channel, kqt-like subfamily, member 4, Mfsd2a - major facilitator superfamily domain containing 2a, Slc15a2 - solute carrier family 15 (oligopeptide transporter), member 2, Nipal2 - nipa-like domain containing 2, Atp5i - atp synthase, h+ transporting, mitochondrial fo complex, subunit e, P2rx5 - purinergic receptor p2x, ligand-gated ion chan…	MF	DOWN
GO:0015077	monovalent inorganic cation transmembrane transporter activity	4.15e-14	6.72e-12	2.06	9959	167	2546	88	[Aqp1 - aquaporin 1, Kcnq4 - potassium voltage-gated channel, kqt-like subfamily, member 4, Scn7a - sodium channel, voltage-gated, type vii, alpha, Slc15a2 - solute carrier family 15 (oligopeptide transporter), member 2, Slc6a7 - solute carrier family 6 (neurotransmitter transporter), member 7, Atp5i - atp synthase, h+ transporting, mitochondrial fo complex, subunit e, Slc1a3 - solute carrier fam…	MF	DOWN
GO:0048018	receptor ligand activity	2.32e-13	3.61e-11	2.07	9959	155	2546	82	[Fgf13 - fibroblast growth factor 13, Jag2 - jagged 2, Pspn - persephin, Sema5b - sema domain, seven thrombospondin repeats (type 1 and type 1-like), transmembrane domain (tm) and short cytoplasmic domain, (semaphorin) 5b, Amh - anti-mullerian hormone, Sema6d - sema domain, transmembrane domain (tm), and cytoplasmic domain, (semaphorin) 6d, Hdgfrp3 - hepatoma-derived growth factor, related protei…	MF	DOWN
GO:0030545	receptor regulator activity	3.33e-13	4.98e-11	2.01	9959	169	2546	87	[Fgf13 - fibroblast growth factor 13, Jag2 - jagged 2, Pspn - persephin, Sema5b - sema domain, seven thrombospondin repeats (type 1 and type 1-like), transmembrane domain (tm) and short cytoplasmic domain, (semaphorin) 5b, Amh - anti-mullerian hormone, Sema6d - sema domain, transmembrane domain (tm), and cytoplasmic domain, (semaphorin) 6d, Hdgfrp3 - hepatoma-derived growth factor, related protei…	MF	DOWN
GO:0022857	transmembrane transporter activity	4.38e-13	6.31e-11	1.58	9959	474	2546	191	[Jph2 - junctophilin 2, Kcnq4 - potassium voltage-gated channel, kqt-like subfamily, member 4, Mfsd2a - major facilitator superfamily domain containing 2a, Nipal2 - nipa-like domain containing 2, Slc15a2 - solute carrier family 15 (oligopeptide transporter), member 2, Atp5i - atp synthase, h+ transporting, mitochondrial fo complex, subunit e, P2rx5 - purinergic receptor p2x, ligand-gated ion chan…	MF	DOWN
GO:0005102	signaling receptor binding	2.32e-11	3.22e-09	1.38	9959	879	2546	309	[Cdk5r1 - cyclin-dependent kinase 5, regulatory subunit 1 (p35), Fgf13 - fibroblast growth factor 13, Vwf - von willebrand factor, Sema5b - sema domain, seven thrombospondin repeats (type 1 and type 1-like), transmembrane domain (tm) and short cytoplasmic domain, (semaphorin) 5b, Hdgfrp3 - hepatoma-derived growth factor, related protein 3, Socs1 - suppressor of cytokine signaling 1, Usp20 - ubiqu…	MF	DOWN
GO:0015276	ligand-gated ion channel activity	7.45e-11	9.99e-09	3.04	9959	36	2546	28	[Ptk2b - protein tyrosine kinase 2 beta, Aqp1 - aquaporin 1, Jph3 - junctophilin 3, Jph2 - junctophilin 2, Kcnh2 - potassium voltage-gated channel, subfamily h (eag-related), member 2, Scnn1a - sodium channel, nonvoltage-gated 1 alpha, P2rx5 - purinergic receptor p2x, ligand-gated ion channel, 5, Trpv1 - transient receptor potential cation channel, subfamily v, member 1, Trpm2 - transient recepto…	MF	DOWN
GO:0099094	ligand-gated cation channel activity	6.77e-10	8.78e-08	3.06	9959	32	2546	25	[Jph2 - junctophilin 2, Ptk2b - protein tyrosine kinase 2 beta, Aqp1 - aquaporin 1, Jph3 - junctophilin 3, Kcnh2 - potassium voltage-gated channel, subfamily h (eag-related), member 2, Scnn1a - sodium channel, nonvoltage-gated 1 alpha, P2rx5 - purinergic receptor p2x, ligand-gated ion channel, 5, Trpv1 - transient receptor potential cation channel, subfamily v, member 1, Trpm2 - transient recepto…	MF	DOWN
GO:0015081	sodium ion transmembrane transporter activity	7.55e-10	9.47e-08	2.61	9959	51	2546	34	[Scn3b - sodium channel, voltage-gated, type iii, beta, Slc22a1 - solute carrier family 22 (organic cation transporter), member 1, Trpm5 - transient receptor potential cation channel, subfamily m, member 5, Scnn1a - sodium channel, nonvoltage-gated 1 alpha, Slc9b2 - solute carrier family 9, subfamily b (nha2, cation proton antiporter 2), member 2, Scn7a - sodium channel, voltage-gated, type vii, …	MF	DOWN
GO:1901618	organic hydroxy compound transmembrane transporter activity	1.12e-09	1.36e-07	3.69	9959	18	2546	17	[Aqp1 - aquaporin 1, Slc22a1 - solute carrier family 22 (organic cation transporter), member 1, Slco2b1 - solute carrier organic anion transporter family, member 2b1, Slc6a2 - solute carrier family 6 (neurotransmitter transporter), member 2, Slco1a2 - solute carrier organic anion transporter family, member 1a2, Slc16a3 - solute carrier family 16 (monocarboxylate transporter), member 3, Rbp4 - ret…	MF	DOWN
GO:0022834	ligand-gated channel activity	1.78e-09	2.1e-07	2.81	9959	39	2546	28	[Jph2 - junctophilin 2, Jph3 - junctophilin 3, Aqp1 - aquaporin 1, Ptk2b - protein tyrosine kinase 2 beta, Kcnh2 - potassium voltage-gated channel, subfamily h (eag-related), member 2, Scnn1a - sodium channel, nonvoltage-gated 1 alpha, P2rx5 - purinergic receptor p2x, ligand-gated ion channel, 5, Trpv1 - transient receptor potential cation channel, subfamily v, member 1, Trpm2 - transient recepto…	MF	DOWN
GO:0005251	delayed rectifier potassium channel activity	1.95e-08	2.23e-06	3.91	9959	13	2546	13	[Kcnh2 - potassium voltage-gated channel, subfamily h (eag-related), member 2, Kcnb1 - potassium voltage gated channel, shab-related subfamily, member 1, Kcna6 - potassium voltage gated channel, shaker related subfamily, member 6, Kcnq3 - potassium voltage-gated channel, kqt-like subfamily, member 3, Kcnq1 - potassium voltage-gated channel, kqt-like subfamily, member 1, Kcnc4 - potassium voltage …	MF	DOWN
GO:0005539	glycosaminoglycan binding	2.92e-08	3.24e-06	1.91	9959	121	2546	59	[Abi3bp - abi family, member 3 (nesh) binding protein, Nav2 - neuron navigator 2, Sema5a - sema domain, seven thrombospondin repeats (type 1 and type 1-like), transmembrane domain (tm) and short cytoplasmic domain, (semaphorin) 5a, Cfh - complement factor h, Eva1c - eva-1 homolog c, Vit - vitrin, Fgfrl1 - fibroblast growth factor receptor-like 1, Stab1 - stabilin 1, Pf4 - platelet factor 4, Anxa4…	MF	DOWN
GO:0001653	peptide receptor activity	6.43e-08	6.94e-06	2.58	9959	41	2546	27	[Agtr1b - angiotensin ii receptor, type 1b, Ramp1 - receptor (g protein-coupled) activity modifying protein 1, Cxcr4 - chemokine (c-x-c motif) receptor 4, Gpr83 - g protein-coupled receptor 83, Ccrl2 - chemokine (c-c motif) receptor-like 2, Npr1 - natriuretic peptide receptor a/guanylate cyclase a (atrionatriuretic peptide receptor a), Adcyap1r1 - adenylate cyclase activating polypeptide 1 recept…	MF	DOWN
GO:0005125	cytokine activity	7.21e-08	7.58e-06	2.18	9959	70	2546	39	[Cxcl1 - chemokine (c-x-c motif) ligand 1, Gdf10 - growth differentiation factor 10, Bmp5 - bone morphogenetic protein 5, Il1rn - interleukin 1 receptor antagonist, Cxcl14 - chemokine (c-x-c motif) ligand 14, Il23a - interleukin 23, alpha subunit p19, Ccl6 - chemokine (c-c motif) ligand 6, Cx3cl1 - chemokine (c-x3-c motif) ligand 1, Tnfsf10 - tumor necrosis factor (ligand) superfamily, member 10,…	MF	DOWN
GO:0005215	transporter activity	1.12e-07	1.15e-05	1.37	9959	586	2546	205	[Jph2 - junctophilin 2, Kcnq4 - potassium voltage-gated channel, kqt-like subfamily, member 4, Mfsd2a - major facilitator superfamily domain containing 2a, Slc15a2 - solute carrier family 15 (oligopeptide transporter), member 2, Sv2c - synaptic vesicle glycoprotein 2c, Trpc4 - transient receptor potential cation channel, subfamily c, member 4, Atp11c - atpase, class vi, type 11c, Trpm4 - transien…	MF	DOWN
GO:0008009	chemokine activity	1.37e-07	1.37e-05	3.29	9959	19	2546	16	[Ccl4 - chemokine (c-c motif) ligand 4, Cxcl1 - chemokine (c-x-c motif) ligand 1, Ccl21 - chemokine (c-c motif) ligand 21, Cxcl11 - chemokine (c-x-c motif) ligand 11, Ccl27 - chemokine (c-c motif) ligand 27, Ccl2 - chemokine (c-c motif) ligand 2, Ccl19 - chemokine (c-c motif) ligand 19, Cxcl2 - chemokine (c-x-c motif) ligand 2, Cxcl14 - chemokine (c-x-c motif) ligand 14, Ccl6 - chemokine (c-c mot…	MF	DOWN
GO:0008528	G protein-coupled peptide receptor activity	2.05e-07	1.99e-05	2.57	9959	38	2546	25	[Agtr1b - angiotensin ii receptor, type 1b, Ramp1 - receptor (g protein-coupled) activity modifying protein 1, Cxcr4 - chemokine (c-x-c motif) receptor 4, Gpr83 - g protein-coupled receptor 83, Ccrl2 - chemokine (c-c motif) receptor-like 2, Adcyap1r1 - adenylate cyclase activating polypeptide 1 receptor 1, Ogfrl1 - opioid growth factor receptor-like 1, Agtr2 - angiotensin ii receptor, type 2, Glp…	MF	DOWN
GO:0015085	calcium ion transmembrane transporter activity	2.11e-07	2.01e-05	2.16	9959	67	2546	37	[Jph3 - junctophilin 3, Jph2 - junctophilin 2, Tmem37 - transmembrane protein 37, Cacna1h - calcium channel, voltage-dependent, t type, alpha 1h subunit, Cacna1g - calcium channel, voltage-dependent, t type, alpha 1g subunit, Trpc4 - transient receptor potential cation channel, subfamily c, member 4, Atp2b3 - atpase, ca++ transporting, plasma membrane 3, Trpv1 - transient receptor potential catio…	MF	DOWN
GO:0098772	molecular function regulator	2.18e-07	2.02e-05	1.28	9959	917	2546	300	[Cdk5r1 - cyclin-dependent kinase 5, regulatory subunit 1 (p35), Fgf13 - fibroblast growth factor 13, Sema5b - sema domain, seven thrombospondin repeats (type 1 and type 1-like), transmembrane domain (tm) and short cytoplasmic domain, (semaphorin) 5b, Ppp1r12a - protein phosphatase 1, regulatory subunit 12a, Hdgfrp3 - hepatoma-derived growth factor, related protein 3, Socs1 - suppressor of cytoki…	MF	DOWN
GO:0001664	G protein-coupled receptor binding	3.25e-07	2.94e-05	1.75	9959	145	2546	65	[Magi2 - membrane associated guanylate kinase, ww and pdz domain containing 2, Ramp1 - receptor (g protein-coupled) activity modifying protein 1, Bambi - bmp and activin membrane-bound inhibitor, Usp20 - ubiquitin specific peptidase 20, Ccrl2 - chemokine (c-c motif) receptor-like 2, Gnao1 - guanine nucleotide binding protein (g protein), alpha activating activity polypeptide o, Gnal - guanine nuc…	MF	DOWN
GO:0016247	channel regulator activity	9.41e-07	8.31e-05	2.01	9959	78	2546	40	[Fgf13 - fibroblast growth factor 13, Gpld1 - glycosylphosphatidylinositol specific phospholipase d1, Scn3b - sodium channel, voltage-gated, type iii, beta, Rrad - ras-related associated with diabetes, Fxyd1 - fxyd domain-containing ion transport regulator 1, Nos1 - nitric oxide synthase 1, neuronal, Prkcz - protein kinase c, zeta, Kcnab1 - potassium voltage-gated channel, shaker-related subfamil…	MF	DOWN
GO:0019955	cytokine binding	1.22e-06	0.000105	2.07	9959	68	2546	36	[Agrn - agrin, Ltbp3 - latent transforming growth factor beta binding protein 3, Acvrl1 - activin a receptor type ii-like 1, Wfikkn2 - wap, follistatin/kazal, immunoglobulin, kunitz and netrin domain containing 2, Cxcr4 - chemokine (c-x-c motif) receptor 4, Ghr - growth hormone receptor, Comp - cartilage oligomeric matrix protein, Cd74 - cd74 molecule, major histocompatibility complex, class ii i…	MF	DOWN
GO:0000981	DNA-binding transcription factor activity, RNA polymerase II-specific	1.38e-06	0.000117	1.43	9959	360	2546	132	[Gli1 - gli family zinc finger 1, Gli2 - gli family zinc finger 2, Klf10 - kruppel-like factor 10, Lrrfip1 - leucine rich repeat (in flii) interacting protein 1, Creb5 - camp responsive element binding protein 5, Atf3 - activating transcription factor 3, Thra - thyroid hormone receptor alpha, Nr3c2 - nuclear receptor subfamily 3, group c, member 2, Nr1d1 - nuclear receptor subfamily 1, group d, m…	MF	DOWN
GO:1901681	sulfur compound binding	1.86e-06	0.000154	1.69	9959	148	2546	64	[Acadm - acyl-coa dehydrogenase, c-4 to c-12 straight chain, Abi3bp - abi family, member 3 (nesh) binding protein, Nav2 - neuron navigator 2, Sema5a - sema domain, seven thrombospondin repeats (type 1 and type 1-like), transmembrane domain (tm) and short cytoplasmic domain, (semaphorin) 5a, Cfh - complement factor h, Eva1c - eva-1 homolog c, Gstm7 - glutathione s-transferase, mu 7, Fgfrl1 - fibro…	MF	DOWN
GO:0005262	calcium channel activity	1.9e-06	0.000154	2.17	9959	56	2546	31	[Jph2 - junctophilin 2, Jph3 - junctophilin 3, Tmem37 - transmembrane protein 37, Cacna1h - calcium channel, voltage-dependent, t type, alpha 1h subunit, Cacna1g - calcium channel, voltage-dependent, t type, alpha 1g subunit, Trpc4 - transient receptor potential cation channel, subfamily c, member 4, Trpv1 - transient receptor potential cation channel, subfamily v, member 1, Trpm4 - transient rec…	MF	DOWN
GO:0005089	Rho guanyl-nucleotide exchange factor activity	1.94e-06	0.000154	2.22	9959	51	2546	29	[Plekhg3 - pleckstrin homology domain containing, family g (with rhogef domain) member 3, Ngef - neuronal guanine nucleotide exchange factor, Arhgef10l - rho guanine nucleotide exchange factor (gef) 10-like, Fgd4 - fyve, rhogef and ph domain containing 4, Rasgrf2 - ras protein-specific guanine nucleotide-releasing factor 2, Dock11 - dedicator of cytokinesis 11, Plekhg1 - pleckstrin homology domai…	MF	DOWN
GO:0005272	sodium channel activity	4.07e-06	0.000317	3.35	9959	14	2546	12	[Scn3b - sodium channel, voltage-gated, type iii, beta, Scn1b - sodium channel, voltage-gated, type i, beta, Pkd2 - polycystic kidney disease 2 (autosomal dominant), Trpm5 - transient receptor potential cation channel, subfamily m, member 5, Trpm2 - transient receptor potential cation channel, subfamily m, member 2, Nalcn - sodium leak channel, non-selective, Grik5 - glutamate receptor, ionotropi…	MF	DOWN
GO:0008028	monocarboxylic acid transmembrane transporter activity	4.86e-06	0.000371	3.18	9959	16	2546	13	[Slc27a1 - solute carrier family 27 (fatty acid transporter), member 1, Mfsd2a - major facilitator superfamily domain containing 2a, Slco2b1 - solute carrier organic anion transporter family, member 2b1, Slc16a3 - solute carrier family 16 (monocarboxylate transporter), member 3, Slco1a2 - solute carrier organic anion transporter family, member 1a2, Slc16a7 - solute carrier family 16 (monocarboxyl…	MF	DOWN
GO:0008201	heparin binding	5.65e-06	0.000423	1.87	9959	88	2546	42	[Comp - cartilage oligomeric matrix protein, Nell2 - nel-like 2 (chicken), Abi3bp - abi family, member 3 (nesh) binding protein, Nav2 - neuron navigator 2, Ptprc - protein tyrosine phosphatase, receptor type, c, Adamts15 - adam metallopeptidase with thrombospondin type 1 motif, 15, Cfh - complement factor h, Fgf1 - fibroblast growth factor 1 (acidic), Sost - sclerostin, Fgf12 - fibroblast growth …	MF	DOWN
GO:0050839	cell adhesion molecule binding	1.21e-05	0.000885	1.63	9959	149	2546	62	[Cdk5r1 - cyclin-dependent kinase 5, regulatory subunit 1 (p35), Vwf - von willebrand factor, Epcam - epithelial cell adhesion molecule, Nos3 - nitric oxide synthase 3, endothelial cell, Dst - dystonin, Trpc4 - transient receptor potential cation channel, subfamily c, member 4, Nlgn3 - neuroligin 3, Fbln1 - fibulin 1, Cx3cl1 - chemokine (c-x3-c motif) ligand 1, Vcam1 - vascular cell adhesion mole…	MF	DOWN
GO:0003779	actin binding	1.38e-05	0.000994	1.47	9959	253	2546	95	[Cdk5r1 - cyclin-dependent kinase 5, regulatory subunit 1 (p35), Mobp - myelin-associated oligodendrocyte basic protein, Limch1 - lim and calponin homology domains 1, Plekhh2 - pleckstrin homology domain containing, family h (with myth4 domain) member 2, Nos3 - nitric oxide synthase 3, endothelial cell, Diaph1 - diaphanous-related formin 1, Cxcr4 - chemokine (c-x-c motif) receptor 4, Svil - super…	MF	DOWN
GO:0019838	growth factor binding	2.63e-05	0.00186	1.71	9959	110	2546	48	[Agrn - agrin, Ltbp3 - latent transforming growth factor beta binding protein 3, Acvrl1 - activin a receptor type ii-like 1, Wfikkn2 - wap, follistatin/kazal, immunoglobulin, kunitz and netrin domain containing 2, Ghr - growth hormone receptor, Col4a1 - collagen, type iv, alpha 1, Ngfr - nerve growth factor receptor, Dusp1 - dual specificity phosphatase 1, Ntf3 - neurotrophin 3, Nrros - negative …	MF	DOWN
GO:0099106	ion channel regulator activity	2.98e-05	0.00207	1.96	9959	62	2546	31	[Scn3b - sodium channel, voltage-gated, type iii, beta, Rrad - ras-related associated with diabetes, Prkcz - protein kinase c, zeta, Fxyd1 - fxyd domain-containing ion transport regulator 1, Kcnab1 - potassium voltage-gated channel, shaker-related subfamily, beta member 1, Lrrc38 - leucine rich repeat containing 38, Amigo1 - adhesion molecule with ig like domain 1, Kcnmb1 - potassium large conduc…	MF	DOWN
GO:0001540	amyloid-beta binding	4.01e-05	0.00273	2.21	9959	39	2546	22	[Gprasp2 - g protein-coupled receptor associated sorting protein 2, Apbb1 - amyloid beta (a4) precursor protein-binding, family b, member 1 (fe65), Itgb2 - integrin, beta 2, Insr - insulin receptor, Fbxo2 - f-box protein 2, Clu - clusterin, Gsap - gamma-secretase activating protein, Itm2a - integral membrane protein 2a, Ngfr - nerve growth factor receptor, Cd74 - cd74 molecule, major histocompati…	MF	DOWN
GO:0015291	secondary active transmembrane transporter activity	4.31e-05	0.00289	1.73	9959	97	2546	43	[Slc22a5 - solute carrier family 22 (organic cation/carnitine transporter), member 5, Slc47a1 - solute carrier family 47 (multidrug and toxin extrusion), member 1, Slc22a1 - solute carrier family 22 (organic cation transporter), member 1, Mfsd2a - major facilitator superfamily domain containing 2a, Slc9b2 - solute carrier family 9, subfamily b (nha2, cation proton antiporter 2), member 2, Slc6a2 …	MF	DOWN
GO:0042379	chemokine receptor binding	4.48e-05	0.00295	2.46	9959	27	2546	17	[Ccl4 - chemokine (c-c motif) ligand 4, Cxcl1 - chemokine (c-x-c motif) ligand 1, Cxcl11 - chemokine (c-x-c motif) ligand 11, Ccl21 - chemokine (c-c motif) ligand 21, Ccrl2 - chemokine (c-c motif) receptor-like 2, Ccl2 - chemokine (c-c motif) ligand 2, Ccl27 - chemokine (c-c motif) ligand 27, Ccl19 - chemokine (c-c motif) ligand 19, Cxcl2 - chemokine (c-x-c motif) ligand 2, Cxcl14 - chemokine (c-…	MF	DOWN
GO:0001228	DNA-binding transcription activator activity, RNA polymerase II-specific	5.93e-05	0.00384	1.48	9959	203	2546	77	[Gli2 - gli family zinc finger 2, Ier2 - immediate early response 2, Nfatc1 - nuclear factor of activated t-cells, cytoplasmic, calcineurin-dependent 1, Eaf2 - ell associated factor 2, Ep300 - e1a binding protein p300, Klf10 - kruppel-like factor 10, Creb5 - camp responsive element binding protein 5, Fosb - fbj osteosarcoma oncogene b, Creb3l2 - camp responsive element binding protein 3-like 2, E…	MF	DOWN
GO:0005242	inward rectifier potassium channel activity	7.09e-05	0.00452	3.91	9959	7	2546	7	[Kcnj12 - potassium inwardly-rectifying channel, subfamily j, member 12, Kcnj15 - potassium inwardly-rectifying channel, subfamily j, member 15, Kcnh2 - potassium voltage-gated channel, subfamily h (eag-related), member 2, Kcnj8 - potassium inwardly-rectifying channel, subfamily j, member 8, Kcnk1 - potassium channel, subfamily k, member 1, Kcnj11 - potassium inwardly rectifying channel, subfamil…	MF	DOWN
GO:0086008	voltage-gated potassium channel activity involved in cardiac muscle cell action potential repolarization	7.09e-05	0.00445	3.91	9959	7	2546	7	[Kcnh2 - potassium voltage-gated channel, subfamily h (eag-related), member 2, Kcne4 - potassium voltage-gated channel, isk-related family, member 4, Kcnj8 - potassium inwardly-rectifying channel, subfamily j, member 8, Kcne1 - potassium voltage-gated channel, isk-related family, member 1, Kcna5 - potassium voltage-gated channel, shaker-related subfamily, member 5, Kcnq1 - potassium voltage-gated…	MF	DOWN
GO:0001012	RNA polymerase II regulatory region DNA binding	9.21e-05	0.00569	1.32	9959	415	2546	140	[Gli1 - gli family zinc finger 1, Gli2 - gli family zinc finger 2, Dnmt3a - dna (cytosine-5-)-methyltransferase 3 alpha, Klf10 - kruppel-like factor 10, Chd7 - chromodomain helicase dna binding protein 7, Lrrfip1 - leucine rich repeat (in flii) interacting protein 1, Thra - thyroid hormone receptor alpha, Atf3 - activating transcription factor 3, Nr1d1 - nuclear receptor subfamily 1, group d, mem…	MF	DOWN
GO:0008092	cytoskeletal protein binding	9.83e-05	0.00598	1.25	9959	627	2546	201	[Cdk5r1 - cyclin-dependent kinase 5, regulatory subunit 1 (p35), Mobp - myelin-associated oligodendrocyte basic protein, Fgf13 - fibroblast growth factor 13, Plekhh2 - pleckstrin homology domain containing, family h (with myth4 domain) member 2, Hdgfrp3 - hepatoma-derived growth factor, related protein 3, Diaph1 - diaphanous-related formin 1, Cxcr4 - chemokine (c-x-c motif) receptor 4, Map7d3 - m…	MF	DOWN
GO:0044212	transcription regulatory region DNA binding	0.000101	0.00602	1.28	9959	519	2546	170	[Gli1 - gli family zinc finger 1, Gli2 - gli family zinc finger 2, Ikzf4 - ikaros family zinc finger 4, Dnmt3a - dna (cytosine-5-)-methyltransferase 3 alpha, Arid5a - at rich interactive domain 5a (mrf1 like), Klf10 - kruppel-like factor 10, Chd7 - chromodomain helicase dna binding protein 7, Lrrfip1 - leucine rich repeat (in flii) interacting protein 1, Tbl1x - transducin (beta)-like 1 x-linked,…	MF	DOWN
GO:0000977	RNA polymerase II regulatory region sequence-specific DNA binding	0.000122	0.00721	1.32	9959	407	2546	137	[Gli1 - gli family zinc finger 1, Gli2 - gli family zinc finger 2, Dnmt3a - dna (cytosine-5-)-methyltransferase 3 alpha, Klf10 - kruppel-like factor 10, Chd7 - chromodomain helicase dna binding protein 7, Lrrfip1 - leucine rich repeat (in flii) interacting protein 1, Thra - thyroid hormone receptor alpha, Atf3 - activating transcription factor 3, Nr1d1 - nuclear receptor subfamily 1, group d, mem…	MF	DOWN
GO:0015271	outward rectifier potassium channel activity	0.000126	0.00731	3.48	9959	9	2546	8	[Kcnma1 - potassium large conductance calcium-activated channel, subfamily m, alpha member 1, Pkd2 - polycystic kidney disease 2 (autosomal dominant), Kcnb1 - potassium voltage gated channel, shab-related subfamily, member 1, Kcnip2 - kv channel-interacting protein 2, Kcna5 - potassium voltage-gated channel, shaker-related subfamily, member 5, Kcna2 - potassium voltage-gated channel, shaker-relat…	MF	DOWN
GO:0033549	MAP kinase phosphatase activity	0.000126	0.0072	3.48	9959	9	2546	8	[Dusp4 - dual specificity phosphatase 4, Dusp3 - dual specificity phosphatase 3, Dusp10 - dual specificity phosphatase 10, Dusp1 - dual specificity phosphatase 1, Dusp6 - dual specificity phosphatase 6, Dusp2 - dual specificity phosphatase 2, Dusp16 - dual specificity phosphatase 16, Dusp5 - dual specificity phosphatase 5]	MF	DOWN
GO:0035586	purinergic receptor activity	0.000126	0.0071	3.48	9959	9	2546	8	[P2ry6 - pyrimidinergic receptor p2y, g-protein coupled, 6, P2ry2 - purinergic receptor p2y, g-protein coupled, 2, P2ry12 - purinergic receptor p2y, g-protein coupled, 12, P2rx1 - purinergic receptor p2x, ligand-gated ion channel, 1, P2rx5 - purinergic receptor p2x, ligand-gated ion channel, 5, Adora2a - adenosine a2a receptor, P2ry14 - purinergic receptor p2y, g-protein coupled, 14, Gpr34 - g pr…	MF	DOWN
GO:0051371	muscle alpha-actinin binding	0.000126	0.007	3.48	9959	9	2546	8	[Pkd2 - polycystic kidney disease 2 (autosomal dominant), Myom1 - myomesin 1, Nrap - nebulin-related anchoring protein, Obsl1 - obscurin-like 1, Myom3 - myomesin 3, Mybpc2 - myosin binding protein c, fast-type, Ldb3 - lim domain binding 3, Synpo2 - synaptopodin 2]	MF	DOWN
GO:0005230	extracellular ligand-gated ion channel activity	0.000151	0.00826	3.2	9959	11	2546	9	[Ptk2b - protein tyrosine kinase 2 beta, Trpv1 - transient receptor potential cation channel, subfamily v, member 1, Chrne - cholinergic receptor, nicotinic, epsilon (muscle), Grik5 - glutamate receptor, ionotropic, kainate 5, P2rx1 - purinergic receptor p2x, ligand-gated ion channel, 1, P2rx5 - purinergic receptor p2x, ligand-gated ion channel, 5, Gabra4 - gamma-aminobutyric acid (gaba) a recept…	MF	DOWN
GO:0008307	structural constituent of muscle	0.000153	0.00826	3.01	9959	13	2546	10	[Dmd - dystrophin, Myl6 - myosin, light chain 6, alkali, smooth muscle and non-muscle, Synm - synemin, intermediate filament protein, Myom1 - myomesin 1, Obsl1 - obscurin-like 1, Pdlim3 - pdz and lim domain 3, Myom3 - myomesin 3, Jph1 - junctophilin 1, Mybpc2 - myosin binding protein c, fast-type, Nexn - nexilin (f actin binding protein)]	MF	DOWN
GO:0008519	ammonium transmembrane transporter activity	0.000153	0.00815	3.01	9959	13	2546	10	[Aqp1 - aquaporin 1, Slc22a5 - solute carrier family 22 (organic cation/carnitine transporter), member 5, Slc25a29 - solute carrier family 25 (mitochondrial carnitine/acylcarnitine carrier), member 29, Slc22a1 - solute carrier family 22 (organic cation transporter), member 1, Slc5a7 - solute carrier family 5 (sodium/choline cotransporter), member 7, Slc6a8 - solute carrier family 6 (neurotransmit…	MF	DOWN
GO:0001067	regulatory region nucleic acid binding	0.000157	0.00823	1.27	9959	523	2546	170	[Gli2 - gli family zinc finger 2, Gli1 - gli family zinc finger 1, Ikzf4 - ikaros family zinc finger 4, Dnmt3a - dna (cytosine-5-)-methyltransferase 3 alpha, Arid5a - at rich interactive domain 5a (mrf1 like), Klf10 - kruppel-like factor 10, Chd7 - chromodomain helicase dna binding protein 7, Lrrfip1 - leucine rich repeat (in flii) interacting protein 1, Tbl1x - transducin (beta)-like 1 x-linked,…	MF	DOWN
GO:0003700	DNA-binding transcription factor activity	0.000172	0.00894	1.28	9959	503	2546	164	[Gli2 - gli family zinc finger 2, Gli1 - gli family zinc finger 1, Ikzf4 - ikaros family zinc finger 4, Klf10 - kruppel-like factor 10, Lrrfip1 - leucine rich repeat (in flii) interacting protein 1, Creb5 - camp responsive element binding protein 5, Atf3 - activating transcription factor 3, Thra - thyroid hormone receptor alpha, Taf7 - taf7 rna polymerase ii, tata box binding protein (tbp)-associ…	MF	DOWN
GO:0005088	Ras guanyl-nucleotide exchange factor activity	0.000227	0.0116	1.7	9959	85	2546	37	[Plekhg3 - pleckstrin homology domain containing, family g (with rhogef domain) member 3, Ngef - neuronal guanine nucleotide exchange factor, Arhgef10l - rho guanine nucleotide exchange factor (gef) 10-like, Fgd4 - fyve, rhogef and ph domain containing 4, Rasgrf2 - ras protein-specific guanine nucleotide-releasing factor 2, Dock11 - dedicator of cytokinesis 11, Plekhg1 - pleckstrin homology domai…	MF	DOWN
GO:0051393	alpha-actinin binding	0.000231	0.0117	2.54	9959	20	2546	13	[Pkd2 - polycystic kidney disease 2 (autosomal dominant), Myom1 - myomesin 1, Obsl1 - obscurin-like 1, Nrap - nebulin-related anchoring protein, Kcna5 - potassium voltage-gated channel, shaker-related subfamily, member 5, Cacna1c - calcium channel, voltage-dependent, l type, alpha 1c subunit, Magi1 - membrane associated guanylate kinase, ww and pdz domain containing 1, Adora2a - adenosine a2a rec…	MF	DOWN
GO:0005515	protein binding	0.000244	0.0122	1.06	9959	4642	2546	1263	[Plekhh2 - pleckstrin homology domain containing, family h (with myth4 domain) member 2, Acadm - acyl-coa dehydrogenase, c-4 to c-12 straight chain, Cxcr4 - chemokine (c-x-c motif) receptor 4, Peli2 - pellino e3 ubiquitin protein ligase family member 2, Adcyap1r1 - adenylate cyclase activating polypeptide 1 receptor 1, Rnf207 - ring finger protein 207, Il1rn - interleukin 1 receptor antagonist, N…	MF	DOWN
eceptor subfamily 3, group c, member 2, Map7d3 - map7 domain containing 3, Fmnl1 - formin-like 1, Trpc4 - transient receptor potential cation channel, subfamily c, member 4, Obsl1 - obscurin-like 1, Col4a3 - collagen, type iv, alpha 3, Gnai1 - guanine nucleotide binding protein (g protein), alpha inhibiting activity polypeptide 1, Bnip3 - bcl2/adenovirus e1b interacting protein 3, Foxo1 - forkhea…										MF	DOWN
GO:0008188	neuropeptide receptor activity	0.000278	0.0137	3.91	9959	6	2546	6	[Sstr4 - somatostatin receptor 4, Npy1r - neuropeptide y receptor y1, Sort1 - sortilin 1, Gpr83 - g protein-coupled receptor 83, Gal - galanin/gmap prepropeptide, Rxfp3 - relaxin/insulin-like family peptide receptor 3]	MF	DOWN
GO:0005025	transforming growth factor beta receptor activity, type I	0.000278	0.0135	3.91	9959	6	2546	6	[Acvr1b - activin a receptor, type ib, Acvrl1 - activin a receptor type ii-like 1, Bmpr1a - bone morphogenetic protein receptor, type ia, Bmpr1b - bone morphogenetic protein receptor, type ib, Tgfbr1 - transforming growth factor, beta receptor 1, Acvr1 - activin a receptor, type i]	MF	DOWN
GO:0015293	symporter activity	0.000281	0.0135	1.88	9959	54	2546	26	[Slc22a5 - solute carrier family 22 (organic cation/carnitine transporter), member 5, Slc22a1 - solute carrier family 22 (organic cation transporter), member 1, Mfsd2a - major facilitator superfamily domain containing 2a, Slc6a7 - solute carrier family 6 (neurotransmitter transporter), member 7, Slc15a2 - solute carrier family 15 (oligopeptide transporter), member 2, Slc6a2 - solute carrier famil…	MF	DOWN
GO:0050840	extracellular matrix binding	0.000312	0.0148	1.96	9959	46	2546	23	[Itga7 - integrin, alpha 7, Agrn - agrin, Adamts5 - adam metallopeptidase with thrombospondin type 1 motif, 5, Olfml2b - olfactomedin-like 2b, Bgn - biglycan, Olfml2a - olfactomedin-like 2a, Tinagl1 - tubulointerstitial nephritis antigen-like 1, Ctss - cathepsin s, Spock2 - sparc/osteonectin, cwcv and kazal-like domains proteoglycan (testican) 2, Adamts15 - adam metallopeptidase with thrombospond…	MF	DOWN
GO:0008013	beta-catenin binding	0.000321	0.015	1.83	9959	60	2546	28	[Dact2 - dishevelled-binding antagonist of beta-catenin 2, Bcl9l - b-cell cll/lymphoma 9-like, Foxo3 - forkhead box o3, Foxo4 - forkhead box o4, Kank1 - kn motif and ankyrin repeat domains 1, Ptprk - protein tyrosine phosphatase, receptor type, k, Nos3 - nitric oxide synthase 3, endothelial cell, Ep300 - e1a binding protein p300, Tbl1x - transducin (beta)-like 1 x-linked, Ptprj - protein tyrosine…	MF	DOWN
GO:0022804	active transmembrane transporter activity	0.000341	0.0158	1.46	9959	177	2546	66	[Slc47a1 - solute carrier family 47 (multidrug and toxin extrusion), member 1, Mfsd2a - major facilitator superfamily domain containing 2a, Slc15a2 - solute carrier family 15 (oligopeptide transporter), member 2, Slc6a7 - solute carrier family 6 (neurotransmitter transporter), member 7, Abcg4 - atp-binding cassette, subfamily g (white), member 4, Slc1a3 - solute carrier family 1 (glial high affin…	MF	DOWN
GO:0042562	hormone binding	0.000346	0.0158	1.92	9959	49	2546	24	[Lepr - leptin receptor, Ramp1 - receptor (g protein-coupled) activity modifying protein 1, Gcgr - glucagon receptor, Insr - insulin receptor, Ghr - growth hormone receptor, Adcyap1r1 - adenylate cyclase activating polypeptide 1 receptor 1, Npr1 - natriuretic peptide receptor a/guanylate cyclase a (atrionatriuretic peptide receptor a), Thra - thyroid hormone receptor alpha, Nr3c2 - nuclear recept…	MF	DOWN
GO:0005217	intracellular ligand-gated ion channel activity	0.000349	0.0158	2.69	9959	16	2546	11	[Jph2 - junctophilin 2, Jph3 - junctophilin 3, Aqp1 - aquaporin 1, Trpv1 - transient receptor potential cation channel, subfamily v, member 1, Pkd2 - polycystic kidney disease 2 (autosomal dominant), Mcoln3 - mucolipin 3, Trpm2 - transient receptor potential cation channel, subfamily m, member 2, Ryr2 - ryanodine receptor 2, cardiac, Ryr3 - ryanodine receptor 3, Itpr1 - inositol 1,4,5-trisphospha…	MF	DOWN
GO:0005326	neurotransmitter transporter activity	0.000358	0.016	2.38	9959	23	2546	14	[Aqp1 - aquaporin 1, Slc22a1 - solute carrier family 22 (organic cation transporter), member 1, Slc13a3 - solute carrier family 13 (sodium-dependent dicarboxylate transporter), member 3, Slc6a2 - solute carrier family 6 (neurotransmitter transporter), member 2, Slc6a7 - solute carrier family 6 (neurotransmitter transporter), member 7, Slc6a4 - solute carrier family 6 (neurotransmitter transporter…	MF	DOWN
GO:0030215	semaphorin receptor binding	0.000412	0.0182	2.79	9959	14	2546	10	[Sema6c - sema domain, transmembrane domain (tm), and cytoplasmic domain, (semaphorin) 6c, Sema6d - sema domain, transmembrane domain (tm), and cytoplasmic domain, (semaphorin) 6d, Sema5b - sema domain, seven thrombospondin repeats (type 1 and type 1-like), transmembrane domain (tm) and short cytoplasmic domain, (semaphorin) 5b, Sema4c - sema domain, immunoglobulin domain (ig), transmembrane doma…	MF	DOWN
GO:0015278	calcium-release channel activity	0.000412	0.018	2.79	9959	14	2546	10	[Jph2 - junctophilin 2, Jph3 - junctophilin 3, Trpv1 - transient receptor potential cation channel, subfamily v, member 1, Pkd2 - polycystic kidney disease 2 (autosomal dominant), Mcoln3 - mucolipin 3, Trpm2 - transient receptor potential cation channel, subfamily m, member 2, Ryr2 - ryanodine receptor 2, cardiac, Ryr3 - ryanodine receptor 3, Itpr1 - inositol 1,4,5-trisphosphate receptor, type 1,…	MF	DOWN
GO:0043169	cation binding	0.000429	0.0186	1.12	9959	1931	2546	552	[Scube3 - signal peptide, cub domain, egf-like 3, Rnf103 - ring finger protein 103, Nr3c2 - nuclear receptor subfamily 3, group c, member 2, Rnf207 - ring finger protein 207, Atp11c - atpase, class vi, type 11c, Tns1 - tensin 1, Rnf19b - ring finger protein 19b, Trpm4 - transient receptor potential cation channel, subfamily m, member 4, Trpm2 - transient receptor potential cation channel, subfami…	MF	DOWN
GO:0001614	purinergic nucleotide receptor activity	0.000441	0.0188	3.42	9959	8	2546	7	[P2ry6 - pyrimidinergic receptor p2y, g-protein coupled, 6, P2ry2 - purinergic receptor p2y, g-protein coupled, 2, P2ry12 - purinergic receptor p2y, g-protein coupled, 12, P2rx1 - purinergic receptor p2x, ligand-gated ion channel, 1, P2rx5 - purinergic receptor p2x, ligand-gated ion channel, 5, P2ry14 - purinergic receptor p2y, g-protein coupled, 14, Gpr34 - g protein-coupled receptor 34]	MF	DOWN
GO:0016502	nucleotide receptor activity	0.000441	0.0186	3.42	9959	8	2546	7	[P2ry6 - pyrimidinergic receptor p2y, g-protein coupled, 6, P2ry2 - purinergic receptor p2y, g-protein coupled, 2, P2ry12 - purinergic receptor p2y, g-protein coupled, 12, P2rx1 - purinergic receptor p2x, ligand-gated ion channel, 1, P2rx5 - purinergic receptor p2x, ligand-gated ion channel, 5, P2ry14 - purinergic receptor p2y, g-protein coupled, 14, Gpr34 - g protein-coupled receptor 34]	MF	DOWN
GO:0017017	MAP kinase tyrosine/serine/threonine phosphatase activity	0.000441	0.0184	3.42	9959	8	2546	7	[Dusp4 - dual specificity phosphatase 4, Dusp10 - dual specificity phosphatase 10, Dusp1 - dual specificity phosphatase 1, Dusp6 - dual specificity phosphatase 6, Dusp5 - dual specificity phosphatase 5, Dusp16 - dual specificity phosphatase 16, Dusp2 - dual specificity phosphatase 2]	MF	DOWN
GO:0004623	phospholipase A2 activity	0.000487	0.0202	3.13	9959	10	2546	8	[Pla2g5 - phospholipase a2, group v, Pnpla3 - patatin-like phospholipase domain containing 3, Pla2g16 - phospholipase a2, group xvi, Pla2g12a - phospholipase a2, group xiia, Pla2g4a - phospholipase a2, group iva (cytosolic, calcium-dependent), Hrasls - hras-like suppressor, Proca1 - protein interacting with cyclin a1, Pnpla8 - patatin-like phospholipase domain containing 8]	MF	DOWN
GO:0001848	complement binding	0.000487	0.02	3.13	9959	10	2546	8	[Serping1 - serpin peptidase inhibitor, clade g (c1 inhibitor), member 1, Itgb2 - integrin, beta 2, C5ar1 - complement component 5a receptor 1, C4b - complement component 4b (chido blood group), C4a - complement component 4a (rodgers blood group), C4bpa - complement component 4 binding protein, alpha, Cd59 - cd59 molecule, complement regulatory protein, Cfh - complement factor h]	MF	DOWN
GO:0000976	transcription regulatory region sequence-specific DNA binding	0.000576	0.0233	1.27	9959	441	2546	143	[Gli1 - gli family zinc finger 1, Gli2 - gli family zinc finger 2, Dnmt3a - dna (cytosine-5-)-methyltransferase 3 alpha, Klf10 - kruppel-like factor 10, Chd7 - chromodomain helicase dna binding protein 7, Lrrfip1 - leucine rich repeat (in flii) interacting protein 1, Atf3 - activating transcription factor 3, Thra - thyroid hormone receptor alpha, Nr1d1 - nuclear receptor subfamily 1, group d, mem…	MF	DOWN
GO:0051015	actin filament binding	0.000624	0.025	1.52	9959	129	2546	50	[Cdk5r1 - cyclin-dependent kinase 5, regulatory subunit 1 (p35), Svil - supervillin, Fgd4 - fyve, rhogef and ph domain containing 4, Tnnc1 - troponin c type 1 (slow), Tmod4 - tropomodulin 4, Coro1a - coronin, actin binding protein 1a, Fmnl1 - formin-like 1, Nexn - nexilin (f actin binding protein), Hip1r - huntingtin interacting protein 1 related, Tnnc2 - troponin c type 2 (fast), Obsl1 - obscuri…	MF	DOWN
GO:0015459	potassium channel regulator activity	0.000639	0.0253	2.16	9959	29	2546	16	[Sgk1 - serum/glucocorticoid regulated kinase 1, Sgk3 - serum/glucocorticoid regulated kinase family, member 3, Kcnip2 - kv channel-interacting protein 2, Ank2 - ankyrin 2, neuronal, Prkcz - protein kinase c, zeta, Abcc9 - atp-binding cassette, subfamily c (cftr/mrp), member 9, Kcnab1 - potassium voltage-gated channel, shaker-related subfamily, beta member 1, Lrrc38 - leucine rich repeat containi…	MF	DOWN
GO:0044325	ion channel binding	0.000656	0.0258	1.61	9959	95	2546	39	[Fgf13 - fibroblast growth factor 13, Agrn - agrin, Stac - sh3 and cysteine rich domain, Scn3b - sodium channel, voltage-gated, type iii, beta, Kcnb1 - potassium voltage gated channel, shab-related subfamily, member 1, Hrc - histidine rich calcium binding protein, Diaph1 - diaphanous-related formin 1, Nos1 - nitric oxide synthase 1, neuronal, Ankrd9 - ankyrin repeat domain 9, Kcnab1 - potassium v…	MF	DOWN
GO:0005245	voltage-gated calcium channel activity	0.000658	0.0256	2.28	9959	24	2546	14	[Htr1b - 5-hydroxytryptamine (serotonin) receptor 1b, g protein-coupled, Pkd2 - polycystic kidney disease 2 (autosomal dominant), Cacna1h - calcium channel, voltage-dependent, t type, alpha 1h subunit, Cacng7 - calcium channel, voltage-dependent, gamma subunit 7, Cacna1g - calcium channel, voltage-dependent, t type, alpha 1g subunit, Cacna1e - calcium channel, voltage-dependent, r type, alpha 1e …	MF	DOWN
GO:0048020	CCR chemokine receptor binding	0.00076	0.0293	2.53	9959	17	2546	11	[Ccl6 - chemokine (c-c motif) ligand 6, Cx3cl1 - chemokine (c-x3-c motif) ligand 1, Ccl4 - chemokine (c-c motif) ligand 4, Ccl21 - chemokine (c-c motif) ligand 21, Ccl3 - chemokine (c-c motif) ligand 3, Ccl2 - chemokine (c-c motif) ligand 2, Ccl27 - chemokine (c-c motif) ligand 27, Ccrl2 - chemokine (c-c motif) receptor-like 2, Ccl19 - chemokine (c-c motif) ligand 19, Ccl12 - chemokine (c-c motif…	MF	DOWN
GO:0099604	ligand-gated calcium channel activity	0.000953	0.0363	2.61	9959	15	2546	10	[Jph2 - junctophilin 2, Jph3 - junctophilin 3, Trpv1 - transient receptor potential cation channel, subfamily v, member 1, Pkd2 - polycystic kidney disease 2 (autosomal dominant), Mcoln3 - mucolipin 3, Trpm2 - transient receptor potential cation channel, subfamily m, member 2, Ryr2 - ryanodine receptor 2, cardiac, Ryr3 - ryanodine receptor 3, Itpr1 - inositol 1,4,5-trisphosphate receptor, type 1,…	MF	DOWN
GO:0007165	signal transduction	3.39e-38	4.76e-34	1.46	9959	1960	2546	731	[Fgf13 - fibroblast growth factor 13, Rom1 - retinal outer segment membrane protein 1, Cxcr4 - chemokine (c-x-c motif) receptor 4, Peli2 - pellino e3 ubiquitin protein ligase family member 2, Adcyap1r1 - adenylate cyclase activating polypeptide 1 receptor 1, Nr3c2 - nuclear receptor subfamily 3, group c, member 2, Il1rn - interleukin 1 receptor antagonist, Tns1 - tensin 1, Ank3 - ankyrin 3, node …	BP	DOWN
ein 1, Itgbl1 - integrin, beta-like 1, Nr4a3 - nuclear receptor subfamily 4, group a, member 3, Myoc - myocilin, trabecular meshwork inducible glucocorticoid response, Nr1h3 - nuclear receptor subfamily 1, group h, member 3, Susd5 - sushi domain containing 5, Krt18 - keratin 18, Kcna5 - potassium voltage-gated channel, shaker-related subfamily, member 5, Dll4 - delta-like 4 (drosophila), Ddx17 - …										BP	DOWN
GO:0003008	system process	1.8e-35	1.27e-31	1.87	9959	622	2546	298	[Rom1 - retinal outer segment membrane protein 1, Fgf13 - fibroblast growth factor 13, Kcnq4 - potassium voltage-gated channel, kqt-like subfamily, member 4, Cxcr4 - chemokine (c-x-c motif) receptor 4, Diaph1 - diaphanous-related formin 1, Ptprj - protein tyrosine phosphatase, receptor type, j, Nr3c2 - nuclear receptor subfamily 3, group c, member 2, Ror1 - receptor tyrosine kinase-like orphan re…	BP	DOWN
GO:0051239	regulation of multicellular organismal process	9.18e-30	4.31e-26	1.42	9959	1851	2546	670	[Fgf13 - fibroblast growth factor 13, Cbln2 - cerebellin 2 precursor, Pi16 - peptidase inhibitor 16, Hopx - hop homeobox, Cxcr4 - chemokine (c-x-c motif) receptor 4, Rnf207 - ring finger protein 207, Il1rn - interleukin 1 receptor antagonist, Ctdsp1 - ctd (carboxy-terminal domain, rna polymerase ii, polypeptide a) small phosphatase 1, Nlgn3 - neuroligin 3, Atp11c - atpase, class vi, type 11c, Syt…	BP	DOWN
GO:0032501	multicellular organismal process	4.44e-29	1.56e-25	1.46	9959	1546	2546	577	[Rom1 - retinal outer segment membrane protein 1, Fgf13 - fibroblast growth factor 13, Acadm - acyl-coa dehydrogenase, c-4 to c-12 straight chain, Kcnq4 - potassium voltage-gated channel, kqt-like subfamily, member 4, Cxcr4 - chemokine (c-x-c motif) receptor 4, Adcyap1r1 - adenylate cyclase activating polypeptide 1 receptor 1, Speg - speg complex locus, Nr3c2 - nuclear receptor subfamily 3, group…	BP	DOWN
GO:0043269	regulation of ion transport	4.04e-28	1.14e-24	2.01	9959	382	2546	196	[Jph2 - junctophilin 2, Kcnq4 - potassium voltage-gated channel, kqt-like subfamily, member 4, Plcb4 - phospholipase c, beta 4, Cxcr4 - chemokine (c-x-c motif) receptor 4, Diaph1 - diaphanous-related formin 1, Hrc - histidine rich calcium binding protein, Adcyap1r1 - adenylate cyclase activating polypeptide 1 receptor 1, Rnf207 - ring finger protein 207, Il1rn - interleukin 1 receptor antagonist,…	BP	DOWN
GO:0007186	G protein-coupled receptor signaling pathway	2.43e-27	5.69e-24	2.29	9959	236	2546	138	[Cdk5r1 - cyclin-dependent kinase 5, regulatory subunit 1 (p35), Adcy5 - adenylate cyclase 5, C5ar1 - complement component 5a receptor 1, Cxcr4 - chemokine (c-x-c motif) receptor 4, Gpr83 - g protein-coupled receptor 83, Adcyap1r1 - adenylate cyclase activating polypeptide 1 receptor 1, Dgkh - diacylglycerol kinase, eta, Gpr4 - g protein-coupled receptor 4, Ogfrl1 - opioid growth factor receptor-…	BP	DOWN
GO:0007166	cell surface receptor signaling pathway	1.22e-26	2.45e-23	1.59	9959	940	2546	382	[Cdk5r1 - cyclin-dependent kinase 5, regulatory subunit 1 (p35), Rom1 - retinal outer segment membrane protein 1, Sema5b - sema domain, seven thrombospondin repeats (type 1 and type 1-like), transmembrane domain (tm) and short cytoplasmic domain, (semaphorin) 5b, Cxcr4 - chemokine (c-x-c motif) receptor 4, Socs1 - suppressor of cytokine signaling 1, Peli2 - pellino e3 ubiquitin protein ligase fam…	BP	DOWN
GO:0050877	nervous system process	2.6e-22	4.58e-19	1.88	9959	382	2546	184	[Fgf13 - fibroblast growth factor 13, Rom1 - retinal outer segment membrane protein 1, Adcy5 - adenylate cyclase 5, Kcnq4 - potassium voltage-gated channel, kqt-like subfamily, member 4, Diaph1 - diaphanous-related formin 1, Ngfr - nerve growth factor receptor, Chd7 - chromodomain helicase dna binding protein 7, Tbl1x - transducin (beta)-like 1 x-linked, Thra - thyroid hormone receptor alpha, Ror…	BP	DOWN
GO:0034765	regulation of ion transmembrane transport	6.71e-21	1.05e-17	2.06	9959	254	2546	134	[Jph2 - junctophilin 2, Kcnq4 - potassium voltage-gated channel, kqt-like subfamily, member 4, Hrc - histidine rich calcium binding protein, Diaph1 - diaphanous-related formin 1, Nos1 - nitric oxide synthase 1, neuronal, Asph - aspartate-beta-hydroxylase, Chd7 - chromodomain helicase dna binding protein 7, Rnf207 - ring finger protein 207, Coro1a - coronin, actin binding protein 1a, Akap7 - a kin…	BP	DOWN
GO:0044057	regulation of system process	1.37e-20	1.92e-17	1.91	9959	334	2546	163	[Trim63 - tripartite motif containing 63, e3 ubiquitin protein ligase, Hopx - hop homeobox, Pi16 - peptidase inhibitor 16, Nos3 - nitric oxide synthase 3, endothelial cell, Popdc2 - popeye domain containing 2, Hrc - histidine rich calcium binding protein, Nos1 - nitric oxide synthase 1, neuronal, Ngfr - nerve growth factor receptor, Tnnc1 - troponin c type 1 (slow), Thra - thyroid hormone recepto…	BP	DOWN
GO:0050793	regulation of developmental process	6.38e-20	8.16e-17	1.36	9959	1654	2546	574	[Fgf13 - fibroblast growth factor 13, Cbln2 - cerebellin 2 precursor, Pi16 - peptidase inhibitor 16, Hopx - hop homeobox, Cxcr4 - chemokine (c-x-c motif) receptor 4, Il1rn - interleukin 1 receptor antagonist, Ctdsp1 - ctd (carboxy-terminal domain, rna polymerase ii, polypeptide a) small phosphatase 1, Fmnl1 - formin-like 1, Nlgn3 - neuroligin 3, Atp11c - atpase, class vi, type 11c, Agtr2 - angiot…	BP	DOWN
GO:0032879	regulation of localization	1.54e-19	1.8e-16	1.35	9959	1715	2546	590	[Kcnq4 - potassium voltage-gated channel, kqt-like subfamily, member 4, Cxcr4 - chemokine (c-x-c motif) receptor 4, Adcyap1r1 - adenylate cyclase activating polypeptide 1 receptor 1, Nr3c2 - nuclear receptor subfamily 3, group c, member 2, Rnf207 - ring finger protein 207, Il1rn - interleukin 1 receptor antagonist, Trpc4 - transient receptor potential cation channel, subfamily c, member 4, Nlgn3 …	BP	DOWN
GO:0050789	regulation of biological process	1.89e-19	2.05e-16	1.13	9959	5938	2546	1708	[Plekhh2 - pleckstrin homology domain containing, family h (with myth4 domain) member 2, Kcnq4 - potassium voltage-gated channel, kqt-like subfamily, member 4, Acadm - acyl-coa dehydrogenase, c-4 to c-12 straight chain, Hopx - hop homeobox, Creb5 - camp responsive element binding protein 5, Adcyap1r1 - adenylate cyclase activating polypeptide 1 receptor 1, Nlgn3 - neuroligin 3, Dnajb5 - dnaj (hsp…	BP	DOWN
on specific gene family member 2, Bcor - bcl6 co-repressor, C1qtnf2 - c1q and tumor necrosis factor related protein 2, Porcn - porcupine homolog (drosophila), Adra1d - adrenoceptor alpha 1d, Wnt9a - wingless-type mmtv integration site family, member 9a, Acvr1b - activin a receptor, type ib, Sgcd - sarcoglycan, delta (dystrophin-associated glycoprotein), Arhgap44 - rho gtpase activating protein 44…										BP	DOWN
e iv, alpha 6, Sh3kbp1 - sh3-domain kinase binding protein 1, Col4a5 - collagen, type iv, alpha 5, Nrtn - neurturin, Lama2 - laminin, alpha 2, Apcdd1 - adenomatosis polyposis coli down-regulated 1, Dnmbp - dynamin binding protein, Gna14 - guanine nucleotide binding protein, alpha 14, Nrip2 - nuclear receptor interacting protein 2, Ihh - indian hedgehog, Tnfaip6 - tumor necrosis factor alpha induc…										BP	DOWN
GO:0010646	regulation of cell communication	2.27e-19	2.29e-16	1.31	9959	2022	2546	677	[Fgf13 - fibroblast growth factor 13, Dusp4 - dual specificity phosphatase 4, Kcnq4 - potassium voltage-gated channel, kqt-like subfamily, member 4, Scube3 - signal peptide, cub domain, egf-like 3, Peli2 - pellino e3 ubiquitin protein ligase family member 2, Adcyap1r1 - adenylate cyclase activating polypeptide 1 receptor 1, Nr3c2 - nuclear receptor subfamily 3, group c, member 2, Il1rn - interleu…	BP	DOWN
GO:0034762	regulation of transmembrane transport	6.66e-19	6.25e-16	1.88	9959	322	2546	155	[Jph2 - junctophilin 2, Kcnq4 - potassium voltage-gated channel, kqt-like subfamily, member 4, Hrc - histidine rich calcium binding protein, Diaph1 - diaphanous-related formin 1, Nos1 - nitric oxide synthase 1, neuronal, Asph - aspartate-beta-hydroxylase, Chd7 - chromodomain helicase dna binding protein 7, Rnf207 - ring finger protein 207, Coro1a - coronin, actin binding protein 1a, Akap7 - a kin…	BP	DOWN
GO:0048869	cellular developmental process	7e-19	6.16e-16	1.35	9959	1635	2546	564	[Rom1 - retinal outer segment membrane protein 1, Acadm - acyl-coa dehydrogenase, c-4 to c-12 straight chain, Hopx - hop homeobox, Mfsd2a - major facilitator superfamily domain containing 2a, Cxcr4 - chemokine (c-x-c motif) receptor 4, Creb5 - camp responsive element binding protein 5, Adcyap1r1 - adenylate cyclase activating polypeptide 1 receptor 1, Speg - speg complex locus, Trpc4 - transient …	BP	DOWN
GO:0022610	biological adhesion	9.55e-19	7.9e-16	1.79	9959	394	2546	180	[Rom1 - retinal outer segment membrane protein 1, Cdk5r1 - cyclin-dependent kinase 5, regulatory subunit 1 (p35), Synj2bp - synaptojanin 2 binding protein, Vwf - von willebrand factor, Epb4.1l5 - erythrocyte membrane protein band 4.1 like 5, Ntng2 - netrin g2, Ptpru - protein tyrosine phosphatase, receptor type, u, Coro1a - coronin, actin binding protein 1a, Nlgn3 - neuroligin 3, Gbp4 - guanylate…	BP	DOWN
GO:0007155	cell adhesion	1.23e-18	9.6e-16	1.79	9959	389	2546	178	[Rom1 - retinal outer segment membrane protein 1, Cdk5r1 - cyclin-dependent kinase 5, regulatory subunit 1 (p35), Synj2bp - synaptojanin 2 binding protein, Vwf - von willebrand factor, Epb4.1l5 - erythrocyte membrane protein band 4.1 like 5, Ntng2 - netrin g2, Ptpru - protein tyrosine phosphatase, receptor type, u, Coro1a - coronin, actin binding protein 1a, Nlgn3 - neuroligin 3, Specc1l - sperm …	BP	DOWN
GO:0023051	regulation of signaling	1.28e-18	9.48e-16	1.3	9959	2038	2546	678	[Fgf13 - fibroblast growth factor 13, Dusp4 - dual specificity phosphatase 4, Kcnq4 - potassium voltage-gated channel, kqt-like subfamily, member 4, Scube3 - signal peptide, cub domain, egf-like 3, Peli2 - pellino e3 ubiquitin protein ligase family member 2, Adcyap1r1 - adenylate cyclase activating polypeptide 1 receptor 1, Nr3c2 - nuclear receptor subfamily 3, group c, member 2, Il1rn - interleu…	BP	DOWN
GO:0051241	negative regulation of multicellular organismal process	3.1e-18	2.18e-15	1.53	9959	783	2546	306	[Cdk5r1 - cyclin-dependent kinase 5, regulatory subunit 1 (p35), Fgf13 - fibroblast growth factor 13, Sema5b - sema domain, seven thrombospondin repeats (type 1 and type 1-like), transmembrane domain (tm) and short cytoplasmic domain, (semaphorin) 5b, Pi16 - peptidase inhibitor 16, Socs1 - suppressor of cytokine signaling 1, Gdf10 - growth differentiation factor 10, Ctdsp1 - ctd (carboxy-terminal…	BP	DOWN
GO:0030154	cell differentiation	1.2e-17	8.06e-15	1.42	9959	1116	2546	406	[Rom1 - retinal outer segment membrane protein 1, Acadm - acyl-coa dehydrogenase, c-4 to c-12 straight chain, Hopx - hop homeobox, Cxcr4 - chemokine (c-x-c motif) receptor 4, Creb5 - camp responsive element binding protein 5, Adcyap1r1 - adenylate cyclase activating polypeptide 1 receptor 1, Speg - speg complex locus, Trpc4 - transient receptor potential cation channel, subfamily c, member 4, Nlg…	BP	DOWN
GO:0009605	response to external stimulus	1.52e-17	9.7e-15	1.45	9959	985	2546	366	[Vwf - von willebrand factor, Sema5b - sema domain, seven thrombospondin repeats (type 1 and type 1-like), transmembrane domain (tm) and short cytoplasmic domain, (semaphorin) 5b, Acadm - acyl-coa dehydrogenase, c-4 to c-12 straight chain, Plcb4 - phospholipase c, beta 4, Cxcr4 - chemokine (c-x-c motif) receptor 4, Socs1 - suppressor of cytokine signaling 1, Il1rn - interleukin 1 receptor antagon…	BP	DOWN
GO:0032502	developmental process	2e-17	1.22e-14	1.23	9959	2873	2546	903	[Kcnq4 - potassium voltage-gated channel, kqt-like subfamily, member 4, Hopx - hop homeobox, Acadm - acyl-coa dehydrogenase, c-4 to c-12 straight chain, Mfsd2a - major facilitator superfamily domain containing 2a, Cxcr4 - chemokine (c-x-c motif) receptor 4, Creb5 - camp responsive element binding protein 5, Adcyap1r1 - adenylate cyclase activating polypeptide 1 receptor 1, Nlgn3 - neuroligin 3, A…	BP	DOWN
Mfrp - membrane frizzled-related protein, Rere - arginine-glutamic acid dipeptide (re) repeats, Runx1t1 - runt-related transcription factor 1; translocated to, 1 (cyclin d-related), Ntrk3 - neurotrophic tyrosine kinase, receptor, type 3, Cables1 - cdk5 and abl enzyme substrate 1, Btg2 - btg family, member 2, Atp2b4 - atpase, ca++ transporting, plasma membrane 4, Rtn1 - reticulon 1, Ccl19 - chemok…										BP	DOWN
GO:0010959	regulation of metal ion transport	2.64e-17	1.55e-14	1.95	9959	257	2546	128	[Jph2 - junctophilin 2, Plcb4 - phospholipase c, beta 4, Nos3 - nitric oxide synthase 3, endothelial cell, Cxcr4 - chemokine (c-x-c motif) receptor 4, Diaph1 - diaphanous-related formin 1, Hrc - histidine rich calcium binding protein, Asph - aspartate-beta-hydroxylase, Nos1 - nitric oxide synthase 1, neuronal, Chd7 - chromodomain helicase dna binding protein 7, Adcyap1r1 - adenylate cyclase activ…	BP	DOWN
GO:0051049	regulation of transport	4.08e-17	2.29e-14	1.41	9959	1133	2546	409	[Kcnq4 - potassium voltage-gated channel, kqt-like subfamily, member 4, Cxcr4 - chemokine (c-x-c motif) receptor 4, Adcyap1r1 - adenylate cyclase activating polypeptide 1 receptor 1, Rnf207 - ring finger protein 207, Nr3c2 - nuclear receptor subfamily 3, group c, member 2, Il1rn - interleukin 1 receptor antagonist, Trpc4 - transient receptor potential cation channel, subfamily c, member 4, Nlgn3 …	BP	DOWN
GO:0048583	regulation of response to stimulus	5.35e-17	2.89e-14	1.27	9959	2288	2546	740	[Fgf13 - fibroblast growth factor 13, Dusp4 - dual specificity phosphatase 4, Pi16 - peptidase inhibitor 16, Hopx - hop homeobox, Scube3 - signal peptide, cub domain, egf-like 3, Cxcr4 - chemokine (c-x-c motif) receptor 4, Peli2 - pellino e3 ubiquitin protein ligase family member 2, Adcyap1r1 - adenylate cyclase activating polypeptide 1 receptor 1, Il1rn - interleukin 1 receptor antagonist, Ly86 …	BP	DOWN
unoglobulin domain (ig), short basic domain, secreted, (semaphorin) 3d, Msx2 - msh homeobox 2, Smad7 - smad family member 7, Cacnb4 - calcium channel, voltage-dependent, beta 4 subunit, Mfng - mfng o-fucosylpeptide 3-beta-n-acetylglucosaminyltransferase, Nov - nephroblastoma overexpressed, Nr4a3 - nuclear receptor subfamily 4, group a, member 3, Myoc - myocilin, trabecular meshwork inducible gluc…										BP	DOWN
GO:0065007	biological regulation	6.14e-17	3.2e-14	1.11	9959	6279	2546	1778	[Plekhh2 - pleckstrin homology domain containing, family h (with myth4 domain) member 2, Hopx - hop homeobox, Acadm - acyl-coa dehydrogenase, c-4 to c-12 straight chain, Kcnq4 - potassium voltage-gated channel, kqt-like subfamily, member 4, Creb5 - camp responsive element binding protein 5, Adcyap1r1 - adenylate cyclase activating polypeptide 1 receptor 1, Nlgn3 - neuroligin 3, Dnajb5 - dnaj (hsp…	BP	DOWN
g 15, Cyfip2 - cytoplasmic fmr1 interacting protein 2, Alox12 - arachidonate 12-lipoxygenase, Slc7a3 - solute carrier family 7 (cationic amino acid transporter, y+ system), member 3, Slc1a3 - solute carrier family 1 (glial high affinity glutamate transporter), member 3, Rbbp9 - retinoblastoma binding protein 9, Crebrf - creb3 regulatory factor, Cpeb4 - cytoplasmic polyadenylation element binding …										BP	DOWN
Myrip - myosin viia and rab interacting protein, Stk40 - serine/threonine kinase 40, Lrrc4 - leucine rich repeat containing 4, Nod2 - nucleotide-binding oligomerization domain containing 2, Rdh10 - retinol dehydrogenase 10 (all-trans), Adamts5 - adam metallopeptidase with thrombospondin type 1 motif, 5, Fam65a - family with sequence similarity 65, member a, Gigyf2 - grb10 interacting gyf protein …										BP	DOWN
GO:2000026	regulation of multicellular organismal development	6.56e-17	3.29e-14	1.38	9959	1301	2546	458	[Fgf13 - fibroblast growth factor 13, Cbln2 - cerebellin 2 precursor, Hopx - hop homeobox, Pi16 - peptidase inhibitor 16, Cxcr4 - chemokine (c-x-c motif) receptor 4, Il1rn - interleukin 1 receptor antagonist, Ctdsp1 - ctd (carboxy-terminal domain, rna polymerase ii, polypeptide a) small phosphatase 1, Nlgn3 - neuroligin 3, Atp11c - atpase, class vi, type 11c, Trpm4 - transient receptor potential …	BP	DOWN
GO:0045595	regulation of cell differentiation	7.84e-17	3.81e-14	1.4	9959	1167	2546	418	[Fgf13 - fibroblast growth factor 13, Hopx - hop homeobox, Pi16 - peptidase inhibitor 16, Cxcr4 - chemokine (c-x-c motif) receptor 4, Ctdsp1 - ctd (carboxy-terminal domain, rna polymerase ii, polypeptide a) small phosphatase 1, Nlgn3 - neuroligin 3, Atp11c - atpase, class vi, type 11c, Trpm4 - transient receptor potential cation channel, subfamily m, member 4, Obsl1 - obscurin-like 1, Ctdp1 - ctd…	BP	DOWN
GO:0071805	potassium ion transmembrane transport	1.35e-16	6.35e-14	2.9	9959	66	2546	49	[Aqp1 - aquaporin 1, Kcnq4 - potassium voltage-gated channel, kqt-like subfamily, member 4, Slc1a3 - solute carrier family 1 (glial high affinity glutamate transporter), member 3, Slc9a3 - solute carrier family 9, subfamily a (nhe3, cation proton antiporter 3), member 3, Nalcn - sodium leak channel, non-selective, Tmem38a - transmembrane protein 38a, Kcng1 - potassium voltage-gated channel, subfa…	BP	DOWN
GO:0071804	cellular potassium ion transport	1.35e-16	6.15e-14	2.9	9959	66	2546	49	[Aqp1 - aquaporin 1, Kcnq4 - potassium voltage-gated channel, kqt-like subfamily, member 4, Slc1a3 - solute carrier family 1 (glial high affinity glutamate transporter), member 3, Slc9a3 - solute carrier family 9, subfamily a (nhe3, cation proton antiporter 3), member 3, Nalcn - sodium leak channel, non-selective, Tmem38a - transmembrane protein 38a, Kcng1 - potassium voltage-gated channel, subfa…	BP	DOWN
GO:0050794	regulation of cellular process	2.95e-16	1.3e-13	1.12	9959	5628	2546	1613	[Plekhh2 - pleckstrin homology domain containing, family h (with myth4 domain) member 2, Acadm - acyl-coa dehydrogenase, c-4 to c-12 straight chain, Kcnq4 - potassium voltage-gated channel, kqt-like subfamily, member 4, Hopx - hop homeobox, Creb5 - camp responsive element binding protein 5, Adcyap1r1 - adenylate cyclase activating polypeptide 1 receptor 1, Nlgn3 - neuroligin 3, Dnajb5 - dnaj (hsp…	BP	DOWN
sforming growth factor, beta receptor iii, LOC100366030 - rcg37858-like, Igsf9b - immunoglobulin superfamily, member 9b, Arhgap32 - rho gtpase activating protein 32, Prdm16 - pr domain containing 16, Hes1 - hairy and enhancer of split 1 (drosophila), Itgax - integrin, alpha x, Sox13 - sry (sex determining region y)-box 13, Bmp5 - bone morphogenetic protein 5, Map3k19 - mitogen-activated protein k…										BP	DOWN
arrestin domain containing 3, Gas1 - growth arrest-specific 1, Iqsec3 - iq motif and sec7 domain 3, Cxcl2 - chemokine (c-x-c motif) ligand 2, Rbm4 - rna binding motif protein 4, Mier3 - mesoderm induction early response 1, family member 3, Rnf19a - ring finger protein 19a, e3 ubiquitin protein ligase, Mt2A - metallothionein 2a, Drosha - drosha, ribonuclease type iii, Slc27a1 - solute carrier fami…										BP	DOWN
GO:1904062	regulation of cation transmembrane transport	3.47e-16	1.48e-13	2.06	9959	196	2546	103	[Jph2 - junctophilin 2, Diaph1 - diaphanous-related formin 1, Hrc - histidine rich calcium binding protein, Nos1 - nitric oxide synthase 1, neuronal, Asph - aspartate-beta-hydroxylase, Chd7 - chromodomain helicase dna binding protein 7, Rnf207 - ring finger protein 207, Coro1a - coronin, actin binding protein 1a, Akap7 - a kinase (prka) anchor protein 7, Nlgn3 - neuroligin 3, S100a1 - s100 calciu…	BP	DOWN
GO:0030001	metal ion transport	3.64e-16	1.51e-13	1.86	9959	286	2546	136	[Jph2 - junctophilin 2, Fgf13 - fibroblast growth factor 13, Kcnq4 - potassium voltage-gated channel, kqt-like subfamily, member 4, Asph - aspartate-beta-hydroxylase, Nipal2 - nipa-like domain containing 2, Coro1a - coronin, actin binding protein 1a, Trpc4 - transient receptor potential cation channel, subfamily c, member 4, LOC100911692 - ef-hand calcium-binding domain-containing protein 4a-like…	BP	DOWN
GO:0065008	regulation of biological quality	5.96e-16	2.4e-13	1.27	9959	2146	2546	695	[Fgf13 - fibroblast growth factor 13, Plekhh2 - pleckstrin homology domain containing, family h (with myth4 domain) member 2, Cxcr4 - chemokine (c-x-c motif) receptor 4, Adcyap1r1 - adenylate cyclase activating polypeptide 1 receptor 1, Rnf207 - ring finger protein 207, Nr3c2 - nuclear receptor subfamily 3, group c, member 2, Il1rn - interleukin 1 receptor antagonist, Hsd17b8 - hydroxysteroid (17…	BP	DOWN
myosin viia and rab interacting protein, Msr1 - macrophage scavenger receptor 1, Tmod2 - tropomodulin 2, Tmod1 - tropomodulin 1, Nod2 - nucleotide-binding oligomerization domain containing 2, Adamts5 - adam metallopeptidase with thrombospondin type 1 motif, 5, Rdh10 - retinol dehydrogenase 10 (all-trans), Ccl21 - chemokine (c-c motif) ligand 21, Ank2 - ankyrin 2, neuronal, Gigyf2 - grb10 interact…										BP	DOWN
GO:0006813	potassium ion transport	7.59e-16	2.97e-13	2.75	9959	74	2546	52	[Aqp1 - aquaporin 1, Kcnq4 - potassium voltage-gated channel, kqt-like subfamily, member 4, Fxyd1 - fxyd domain-containing ion transport regulator 1, Slc1a3 - solute carrier family 1 (glial high affinity glutamate transporter), member 3, Slc9a3 - solute carrier family 9, subfamily a (nhe3, cation proton antiporter 3), member 3, Nalcn - sodium leak channel, non-selective, Tmem38a - transmembrane p…	BP	DOWN
GO:0098655	cation transmembrane transport	3.49e-15	1.33e-12	1.81	9959	301	2546	139	[Jph2 - junctophilin 2, Kcnq4 - potassium voltage-gated channel, kqt-like subfamily, member 4, Asph - aspartate-beta-hydroxylase, Slc15a2 - solute carrier family 15 (oligopeptide transporter), member 2, Nipal2 - nipa-like domain containing 2, P2rx5 - purinergic receptor p2x, ligand-gated ion channel, 5, Atp5i - atp synthase, h+ transporting, mitochondrial fo complex, subunit e, Trpc4 - transient …	BP	DOWN
GO:0098662	inorganic cation transmembrane transport	3.72e-15	1.38e-12	1.85	9959	270	2546	128	[Jph2 - junctophilin 2, Kcnq4 - potassium voltage-gated channel, kqt-like subfamily, member 4, Asph - aspartate-beta-hydroxylase, Slc15a2 - solute carrier family 15 (oligopeptide transporter), member 2, Nipal2 - nipa-like domain containing 2, Atp5i - atp synthase, h+ transporting, mitochondrial fo complex, subunit e, Trpc4 - transient receptor potential cation channel, subfamily c, member 4, Trpm…	BP	DOWN
GO:0098660	inorganic ion transmembrane transport	4e-15	1.45e-12	1.82	9959	290	2546	135	[Jph2 - junctophilin 2, Kcnq4 - potassium voltage-gated channel, kqt-like subfamily, member 4, Asph - aspartate-beta-hydroxylase, Slc15a2 - solute carrier family 15 (oligopeptide transporter), member 2, Nipal2 - nipa-like domain containing 2, Atp5i - atp synthase, h+ transporting, mitochondrial fo complex, subunit e, Trpc4 - transient receptor potential cation channel, subfamily c, member 4, Trpm…	BP	DOWN
GO:0051240	positive regulation of multicellular organismal process	9.63e-15	3.39e-12	1.38	9959	1119	2546	395	[Cbln2 - cerebellin 2 precursor, Cxcr4 - chemokine (c-x-c motif) receptor 4, Rnf207 - ring finger protein 207, Il1rn - interleukin 1 receptor antagonist, Nlgn3 - neuroligin 3, Atp11c - atpase, class vi, type 11c, Trpm4 - transient receptor potential cation channel, subfamily m, member 4, Agtr2 - angiotensin ii receptor, type 2, Obsl1 - obscurin-like 1, Fgf16 - fibroblast growth factor 16, Pkdcc -…	BP	DOWN
GO:1903522	regulation of blood circulation	1.64e-14	5.64e-12	2.16	9959	147	2546	81	[Agtr1b - angiotensin ii receptor, type 1b, Rgs4 - regulator of g-protein signaling 4, Hopx - hop homeobox, Cacna1h - calcium channel, voltage-dependent, t type, alpha 1h subunit, Popdc2 - popeye domain containing 2, Nos3 - nitric oxide synthase 3, endothelial cell, Hrc - histidine rich calcium binding protein, Nos1 - nitric oxide synthase 1, neuronal, Fxyd1 - fxyd domain-containing ion transport…	BP	DOWN
GO:0051094	positive regulation of developmental process	2.6e-14	8.71e-12	1.41	9959	944	2546	341	[Cbln2 - cerebellin 2 precursor, Hopx - hop homeobox, Cxcr4 - chemokine (c-x-c motif) receptor 4, Socs1 - suppressor of cytokine signaling 1, Rbm24 - rna binding motif protein 24, Gdf10 - growth differentiation factor 10, Nlgn3 - neuroligin 3, Csf1r - colony stimulating factor 1 receptor, Atp11c - atpase, class vi, type 11c, Ntrk2 - neurotrophic tyrosine kinase, receptor, type 2, Map3k5 - mitogen…	BP	DOWN
GO:0043207	response to external biotic stimulus	3.26e-14	1.07e-11	1.59	9959	494	2546	201	[Vwf - von willebrand factor, Socs1 - suppressor of cytokine signaling 1, Il1rn - interleukin 1 receptor antagonist, Nr1d1 - nuclear receptor subfamily 1, group d, member 1, Fcgr2b - fc fragment of igg, low affinity iib, receptor (cd32), Bnip3 - bcl2/adenovirus e1b interacting protein 3, Stab1 - stabilin 1, Tnfaip8 - tumor necrosis factor, alpha-induced protein 8, Bcl3 - b-cell cll/lymphoma 3, Pp…	BP	DOWN
GO:0051270	regulation of cellular component movement	5.16e-14	1.65e-11	1.49	9959	676	2546	258	[Sema5b - sema domain, seven thrombospondin repeats (type 1 and type 1-like), transmembrane domain (tm) and short cytoplasmic domain, (semaphorin) 5b, Cxcr4 - chemokine (c-x-c motif) receptor 4, Diaph1 - diaphanous-related formin 1, Ptprj - protein tyrosine phosphatase, receptor type, j, Rnf207 - ring finger protein 207, Ptpru - protein tyrosine phosphatase, receptor type, u, Il1rn - interleukin …	BP	DOWN
GO:0098609	cell-cell adhesion	5.26e-14	1.65e-11	1.95	9959	205	2546	102	[Cdk5r1 - cyclin-dependent kinase 5, regulatory subunit 1 (p35), Synj2bp - synaptojanin 2 binding protein, Ntng2 - netrin g2, Ptpru - protein tyrosine phosphatase, receptor type, u, Nlgn3 - neuroligin 3, Vcam1 - vascular cell adhesion molecule 1, Itgb3 - integrin, beta 3, Cldn16 - claudin 16, Fermt3 - fermitin family member 3, Cldn11 - claudin 11, Cdh16 - cadherin 16, Ctnna3 - catenin (cadherin a…	BP	DOWN
GO:0042221	response to chemical	5.48e-14	1.68e-11	1.25	9959	2062	2546	661	[Fgf13 - fibroblast growth factor 13, Acadm - acyl-coa dehydrogenase, c-4 to c-12 straight chain, Cxcr4 - chemokine (c-x-c motif) receptor 4, Rnf103 - ring finger protein 103, Adcyap1r1 - adenylate cyclase activating polypeptide 1 receptor 1, Il1rn - interleukin 1 receptor antagonist, Dnajb5 - dnaj (hsp40) homolog, subfamily b, member 5, Syt11 - synaptotagmin xi, Ank3 - ankyrin 3, node of ranvier…	BP	DOWN
GO:0010033	response to organic substance	7.7e-14	2.31e-11	1.28	9959	1758	2546	575	[Acadm - acyl-coa dehydrogenase, c-4 to c-12 straight chain, Cxcr4 - chemokine (c-x-c motif) receptor 4, Rnf103 - ring finger protein 103, Adcyap1r1 - adenylate cyclase activating polypeptide 1 receptor 1, Il1rn - interleukin 1 receptor antagonist, Dnajb5 - dnaj (hsp40) homolog, subfamily b, member 5, Trpm4 - transient receptor potential cation channel, subfamily m, member 4, Agtr2 - angiotensin …	BP	DOWN
GO:0051480	regulation of cytosolic calcium ion concentration	7.72e-14	2.26e-11	2.04	9959	171	2546	89	[Ptk2b - protein tyrosine kinase 2 beta, Jph2 - junctophilin 2, Adcy5 - adenylate cyclase 5, Jph3 - junctophilin 3, C5ar1 - complement component 5a receptor 1, Hrc - histidine rich calcium binding protein, Cxcr4 - chemokine (c-x-c motif) receptor 4, Fxyd1 - fxyd domain-containing ion transport regulator 1, Nos1 - nitric oxide synthase 1, neuronal, Asph - aspartate-beta-hydroxylase, Ccrl2 - chemok…	BP	DOWN
GO:0008016	regulation of heart contraction	8.4e-14	2.41e-11	2.28	9959	115	2546	67	[Rgs4 - regulator of g-protein signaling 4, Hopx - hop homeobox, Cacna1h - calcium channel, voltage-dependent, t type, alpha 1h subunit, Nos3 - nitric oxide synthase 3, endothelial cell, Popdc2 - popeye domain containing 2, Hrc - histidine rich calcium binding protein, Nos1 - nitric oxide synthase 1, neuronal, Fxyd1 - fxyd domain-containing ion transport regulator 1, Gnao1 - guanine nucleotide bi…	BP	DOWN
GO:0043270	positive regulation of ion transport	1.04e-13	2.91e-11	1.99	9959	185	2546	94	[Jph2 - junctophilin 2, Cxcr4 - chemokine (c-x-c motif) receptor 4, Asph - aspartate-beta-hydroxylase, Nos1 - nitric oxide synthase 1, neuronal, Fxyd1 - fxyd domain-containing ion transport regulator 1, Ctss - cathepsin s, Adcyap1r1 - adenylate cyclase activating polypeptide 1 receptor 1, Rnf207 - ring finger protein 207, Akap7 - a kinase (prka) anchor protein 7, Nlgn3 - neuroligin 3, Cx3cl1 - ch…	BP	DOWN
GO:0019932	second-messenger-mediated signaling	1.05e-13	2.9e-11	2.13	9959	143	2546	78	[Adcy5 - adenylate cyclase 5, Aqp1 - aquaporin 1, Ramp1 - receptor (g protein-coupled) activity modifying protein 1, Nfatc1 - nuclear factor of activated t-cells, cytoplasmic, calcineurin-dependent 1, Nos3 - nitric oxide synthase 3, endothelial cell, Cxcr4 - chemokine (c-x-c motif) receptor 4, Nos1 - nitric oxide synthase 1, neuronal, Pde9a - phosphodiesterase 9a, Ptprj - protein tyrosine phospha…	BP	DOWN
GO:0042391	regulation of membrane potential	1.12e-13	3.04e-11	1.85	9959	243	2546	115	[Fgf13 - fibroblast growth factor 13, Popdc2 - popeye domain containing 2, Ngfr - nerve growth factor receptor, P2rx5 - purinergic receptor p2x, ligand-gated ion channel, 5, Rnf207 - ring finger protein 207, Nr3c2 - nuclear receptor subfamily 3, group c, member 2, Il1rn - interleukin 1 receptor antagonist, Akap7 - a kinase (prka) anchor protein 7, Nlgn3 - neuroligin 3, Ntrk2 - neurotrophic tyrosi…	BP	DOWN
GO:0045597	positive regulation of cell differentiation	2.28e-13	6.06e-11	1.47	9959	703	2546	264	[Hopx - hop homeobox, Cxcr4 - chemokine (c-x-c motif) receptor 4, Socs1 - suppressor of cytokine signaling 1, Rbm24 - rna binding motif protein 24, Gdf10 - growth differentiation factor 10, Nlgn3 - neuroligin 3, Atp11c - atpase, class vi, type 11c, Csf1r - colony stimulating factor 1 receptor, Ntrk2 - neurotrophic tyrosine kinase, receptor, type 2, Trpm4 - transient receptor potential cation chan…	BP	DOWN
GO:0050896	response to stimulus	3.5e-13	9.11e-11	1.19	9959	3025	2546	919	[Acadm - acyl-coa dehydrogenase, c-4 to c-12 straight chain, Cxcr4 - chemokine (c-x-c motif) receptor 4, Adcyap1r1 - adenylate cyclase activating polypeptide 1 receptor 1, Ly86 - lymphocyte antigen 86, Il1rn - interleukin 1 receptor antagonist, Nlgn3 - neuroligin 3, Dnajb5 - dnaj (hsp40) homolog, subfamily b, member 5, Rnf19b - ring finger protein 19b, Syt11 - synaptotagmin xi, Trpm4 - transient …	BP	DOWN
rostaglandin-endoperoxide synthase 2, Pdk4 - pyruvate dehydrogenase kinase, isozyme 4, Cd68 - cd68 molecule, Zbtb4 - zinc finger and btb domain containing 4, Ptch1 - patched 1, Socs3 - suppressor of cytokine signaling 3, Plcb2 - phospholipase c, beta 2, Stk10 - serine/threonine kinase 10, Rev3l - rev3-like, polymerase (dna directed), zeta, catalytic subunit, Ddx3x - dead (asp-glu-ala-asp) box hel…										BP	DOWN
GO:0048518	positive regulation of biological process	3.83e-13	9.79e-11	1.16	9959	3658	2546	1087	[Cbln2 - cerebellin 2 precursor, Hopx - hop homeobox, Cxcr4 - chemokine (c-x-c motif) receptor 4, Peli2 - pellino e3 ubiquitin protein ligase family member 2, Creb5 - camp responsive element binding protein 5, Adcyap1r1 - adenylate cyclase activating polypeptide 1 receptor 1, Rnf207 - ring finger protein 207, Ly86 - lymphocyte antigen 86, Il1rn - interleukin 1 receptor antagonist, Nlgn3 - neuroli…	BP	DOWN
e family member 6, S100b - s100 calcium binding protein b, Sema3b - sema domain, immunoglobulin domain (ig), short basic domain, secreted, (semaphorin) 3b, Lax1 - lymphocyte transmembrane adaptor 1, Ccl6 - chemokine (c-c motif) ligand 6, Ppara - peroxisome proliferator activated receptor alpha, Lgr6 - leucine-rich repeat-containing g protein-coupled receptor 6, Cd6 - cd6 molecule, Gpr183 - g prot…										BP	DOWN
GO:0006812	cation transport	4.05e-13	1.02e-10	1.63	9959	406	2546	169	[Fgf13 - fibroblast growth factor 13, Jph2 - junctophilin 2, Kcnq4 - potassium voltage-gated channel, kqt-like subfamily, member 4, Asph - aspartate-beta-hydroxylase, Nipal2 - nipa-like domain containing 2, Slc15a2 - solute carrier family 15 (oligopeptide transporter), member 2, Atp5i - atp synthase, h+ transporting, mitochondrial fo complex, subunit e, P2rx5 - purinergic receptor p2x, ligand-gat…	BP	DOWN
GO:0048584	positive regulation of response to stimulus	4.74e-13	1.17e-10	1.33	9959	1251	2546	426	[Hopx - hop homeobox, Cxcr4 - chemokine (c-x-c motif) receptor 4, Scube3 - signal peptide, cub domain, egf-like 3, Peli2 - pellino e3 ubiquitin protein ligase family member 2, Adcyap1r1 - adenylate cyclase activating polypeptide 1 receptor 1, Il1rn - interleukin 1 receptor antagonist, Ly86 - lymphocyte antigen 86, Nlgn3 - neuroligin 3, Agtr2 - angiotensin ii receptor, type 2, Trpm4 - transient re…	BP	DOWN
GO:0003012	muscle system process	7.07e-13	1.72e-10	2.13	9959	134	2546	73	[Trim63 - tripartite motif containing 63, e3 ubiquitin protein ligase, Mb - myoglobin, Nos3 - nitric oxide synthase 3, endothelial cell, Cxcr4 - chemokine (c-x-c motif) receptor 4, Nos1 - nitric oxide synthase 1, neuronal, Scn7a - sodium channel, voltage-gated, type vii, alpha, Tmod4 - tropomodulin 4, Tnnc1 - troponin c type 1 (slow), Mrvi1 - murine retrovirus integration site 1 homolog, Grip2 - …	BP	DOWN
GO:0034220	ion transmembrane transport	7.27e-13	1.73e-10	1.64	9959	387	2546	162	[Jph2 - junctophilin 2, Kcnq4 - potassium voltage-gated channel, kqt-like subfamily, member 4, Asph - aspartate-beta-hydroxylase, Nipal2 - nipa-like domain containing 2, Slc15a2 - solute carrier family 15 (oligopeptide transporter), member 2, Atp5i - atp synthase, h+ transporting, mitochondrial fo complex, subunit e, P2rx5 - purinergic receptor p2x, ligand-gated ion channel, 5, Trpc4 - transient …	BP	DOWN
GO:0007600	sensory perception	9.09e-13	2.13e-10	2.03	9959	158	2546	82	[Rom1 - retinal outer segment membrane protein 1, Aqp1 - aquaporin 1, Kcnq4 - potassium voltage-gated channel, kqt-like subfamily, member 4, Cacna1h - calcium channel, voltage-dependent, t type, alpha 1h subunit, Diaph1 - diaphanous-related formin 1, Ngfr - nerve growth factor receptor, Chd7 - chromodomain helicase dna binding protein 7, Lrig1 - leucine-rich repeats and immunoglobulin-like domain…	BP	DOWN
GO:0072507	divalent inorganic cation homeostasis	1.02e-12	2.35e-10	1.79	9959	258	2546	118	[Jph2 - junctophilin 2, Adcy5 - adenylate cyclase 5, C5ar1 - complement component 5a receptor 1, Cxcr4 - chemokine (c-x-c motif) receptor 4, Hrc - histidine rich calcium binding protein, Nos1 - nitric oxide synthase 1, neuronal, Asph - aspartate-beta-hydroxylase, Adcyap1r1 - adenylate cyclase activating polypeptide 1 receptor 1, Gpr4 - g protein-coupled receptor 4, Trpc4 - transient receptor pote…	BP	DOWN
GO:0006811	ion transport	1.1e-12	2.49e-10	1.5	9959	595	2546	228	[Fgf13 - fibroblast growth factor 13, Jph2 - junctophilin 2, Kcnq4 - potassium voltage-gated channel, kqt-like subfamily, member 4, Mfsd2a - major facilitator superfamily domain containing 2a, Slc15a2 - solute carrier family 15 (oligopeptide transporter), member 2, Trpc4 - transient receptor potential cation channel, subfamily c, member 4, Atp11c - atpase, class vi, type 11c, LOC100911692 - ef-ha…	BP	DOWN
GO:0040011	locomotion	1.17e-12	2.61e-10	1.53	9959	538	2546	210	[Fgf13 - fibroblast growth factor 13, Cdk5r1 - cyclin-dependent kinase 5, regulatory subunit 1 (p35), Sema5b - sema domain, seven thrombospondin repeats (type 1 and type 1-like), transmembrane domain (tm) and short cytoplasmic domain, (semaphorin) 5b, Cxcr4 - chemokine (c-x-c motif) receptor 4, Ptprj - protein tyrosine phosphatase, receptor type, j, Il1rn - interleukin 1 receptor antagonist, Fmnl…	BP	DOWN
GO:0009607	response to biotic stimulus	1.54e-12	3.38e-10	1.54	9959	514	2546	202	[Vwf - von willebrand factor, Socs1 - suppressor of cytokine signaling 1, Il1rn - interleukin 1 receptor antagonist, Nr1d1 - nuclear receptor subfamily 1, group d, member 1, Fcgr2b - fc fragment of igg, low affinity iib, receptor (cd32), Bnip3 - bcl2/adenovirus e1b interacting protein 3, Stab1 - stabilin 1, Tnfaip8 - tumor necrosis factor, alpha-induced protein 8, Bcl3 - b-cell cll/lymphoma 3, Pp…	BP	DOWN
GO:0014070	response to organic cyclic compound	2.15e-12	4.65e-10	1.43	9959	771	2546	281	[Acadm - acyl-coa dehydrogenase, c-4 to c-12 straight chain, Diaph1 - diaphanous-related formin 1, Cxcr4 - chemokine (c-x-c motif) receptor 4, Socs1 - suppressor of cytokine signaling 1, Adcyap1r1 - adenylate cyclase activating polypeptide 1 receptor 1, Ptpru - protein tyrosine phosphatase, receptor type, u, Il1rn - interleukin 1 receptor antagonist, Fcgr2b - fc fragment of igg, low affinity iib,…	BP	DOWN
GO:0001508	action potential	2.81e-12	5.98e-10	2.96	9959	45	2546	34	[Kcnh2 - potassium voltage-gated channel, subfamily h (eag-related), member 2, Usp53 - ubiquitin specific peptidase 53, Dmd - dystrophin, Scn3b - sodium channel, voltage-gated, type iii, beta, Cacna1h - calcium channel, voltage-dependent, t type, alpha 1h subunit, Kcnb1 - potassium voltage gated channel, shab-related subfamily, member 1, Cacna1g - calcium channel, voltage-dependent, t type, alpha…	BP	DOWN
GO:0006936	muscle contraction	2.85e-12	5.99e-10	2.29	9959	99	2546	58	[Trim63 - tripartite motif containing 63, e3 ubiquitin protein ligase, Mb - myoglobin, Cxcr4 - chemokine (c-x-c motif) receptor 4, Nos1 - nitric oxide synthase 1, neuronal, Scn7a - sodium channel, voltage-gated, type vii, alpha, Tnnc1 - troponin c type 1 (slow), Tmod4 - tropomodulin 4, Grip2 - glutamate receptor interacting protein 2, Ppp1r13l - protein phosphatase 1, regulatory subunit 13 like, …	BP	DOWN
GO:0007610	behavior	2.94e-12	6.09e-10	1.65	9959	350	2546	148	[Fgf13 - fibroblast growth factor 13, Adcy5 - adenylate cyclase 5, Nos1 - nitric oxide synthase 1, neuronal, Chd7 - chromodomain helicase dna binding protein 7, Thra - thyroid hormone receptor alpha, Il1rn - interleukin 1 receptor antagonist, Nlgn3 - neuroligin 3, Ddo - d-aspartate oxidase, Ntrk2 - neurotrophic tyrosine kinase, receptor, type 2, Ap1s2 - adaptor-related protein complex 1, sigma 2 …	BP	DOWN
GO:0033993	response to lipid	3.25e-12	6.64e-10	1.45	9959	688	2546	255	[Vwf - von willebrand factor, Acadm - acyl-coa dehydrogenase, c-4 to c-12 straight chain, Socs1 - suppressor of cytokine signaling 1, Adcyap1r1 - adenylate cyclase activating polypeptide 1 receptor 1, Ptpru - protein tyrosine phosphatase, receptor type, u, Il1rn - interleukin 1 receptor antagonist, Rbp1 - retinol binding protein 1, cellular, Nr1d1 - nuclear receptor subfamily 1, group d, member 1…	BP	DOWN
GO:2001257	regulation of cation channel activity	3.35e-12	6.74e-10	2.34	9959	92	2546	55	[Jph3 - junctophilin 3, Jph2 - junctophilin 2, Ptk2b - protein tyrosine kinase 2 beta, Hrc - histidine rich calcium binding protein, Asph - aspartate-beta-hydroxylase, Ctss - cathepsin s, Rnf207 - ring finger protein 207, Vamp2 - vesicle-associated membrane protein 2, Akap7 - a kinase (prka) anchor protein 7, Nlgn3 - neuroligin 3, S100a1 - s100 calcium binding protein a1, Slmap - sarcolemma assoc…	BP	DOWN
GO:0014074	response to purine-containing compound	3.36e-12	6.65e-10	2.02	9959	153	2546	79	[Ptk2b - protein tyrosine kinase 2 beta, Aqp1 - aquaporin 1, Nos3 - nitric oxide synthase 3, endothelial cell, Ep300 - e1a binding protein p300, Asph - aspartate-beta-hydroxylase, C1s - complement component 1, s subcomponent, Dusp1 - dual specificity phosphatase 1, P2rx5 - purinergic receptor p2x, ligand-gated ion channel, 5, Fosb - fbj osteosarcoma oncogene b, Gnal - guanine nucleotide binding p…	BP	DOWN
GO:0098742	cell-cell adhesion via plasma-membrane adhesion molecules	5.52e-12	1.08e-09	2.36	9959	88	2546	53	[Epcam - epithelial cell adhesion molecule, Dchs1 - dachsous 1 (drosophila), Cadm3 - cell adhesion molecule 3, Ntng2 - netrin g2, Pcdhb8 - protocadherin beta 8, Nexn - nexilin (f actin binding protein), Vcam1 - vascular cell adhesion molecule 1, Cdh24 - cadherin 24, type 2, Cldn16 - claudin 16, Fgfrl1 - fibroblast growth factor receptor-like 1, Pcdhb9 - protocadherin beta 9, Pcdh10 - protocadheri…	BP	DOWN
GO:0048870	cell motility	5.69e-12	1.1e-09	1.53	9959	498	2546	195	[Fgf13 - fibroblast growth factor 13, Cdk5r1 - cyclin-dependent kinase 5, regulatory subunit 1 (p35), Sema5b - sema domain, seven thrombospondin repeats (type 1 and type 1-like), transmembrane domain (tm) and short cytoplasmic domain, (semaphorin) 5b, Cxcr4 - chemokine (c-x-c motif) receptor 4, Il1rn - interleukin 1 receptor antagonist, Fmnl1 - formin-like 1, Specc1l - sperm antigen with calponin…	BP	DOWN
GO:1904064	positive regulation of cation transmembrane transport	6.65e-12	1.27e-09	2.28	9959	98	2546	57	[Jph2 - junctophilin 2, Asph - aspartate-beta-hydroxylase, Nos1 - nitric oxide synthase 1, neuronal, Fxyd1 - fxyd domain-containing ion transport regulator 1, Ctss - cathepsin s, Rnf207 - ring finger protein 207, Akap7 - a kinase (prka) anchor protein 7, Nlgn3 - neuroligin 3, S100a1 - s100 calcium binding protein a1, Cx3cl1 - chemokine (c-x3-c motif) ligand 1, Ank3 - ankyrin 3, node of ranvier (a…	BP	DOWN
GO:0009888	tissue development	6.68e-12	1.25e-09	1.6	9959	402	2546	164	[Gli2 - gli family zinc finger 2, Amh - anti-mullerian hormone, Epb4.1l5 - erythrocyte membrane protein band 4.1 like 5, Popdc2 - popeye domain containing 2, Klf10 - kruppel-like factor 10, Chd7 - chromodomain helicase dna binding protein 7, Creb5 - camp responsive element binding protein 5, Rbm24 - rna binding motif protein 24, Oxct1 - 3-oxoacid coa transferase 1, Csf1r - colony stimulating fact…	BP	DOWN
GO:0009966	regulation of signal transduction	6.71e-12	1.24e-09	1.25	9959	1789	2546	573	[Fgf13 - fibroblast growth factor 13, Dusp4 - dual specificity phosphatase 4, Scube3 - signal peptide, cub domain, egf-like 3, Peli2 - pellino e3 ubiquitin protein ligase family member 2, Adcyap1r1 - adenylate cyclase activating polypeptide 1 receptor 1, Il1rn - interleukin 1 receptor antagonist, Ly86 - lymphocyte antigen 86, Nlgn3 - neuroligin 3, Trpm4 - transient receptor potential cation chann…	BP	DOWN
GO:0055074	calcium ion homeostasis	6.84e-12	1.25e-09	1.79	9959	238	2546	109	[Jph2 - junctophilin 2, Adcy5 - adenylate cyclase 5, C5ar1 - complement component 5a receptor 1, Cxcr4 - chemokine (c-x-c motif) receptor 4, Hrc - histidine rich calcium binding protein, Nos1 - nitric oxide synthase 1, neuronal, Asph - aspartate-beta-hydroxylase, Adcyap1r1 - adenylate cyclase activating polypeptide 1 receptor 1, Gpr4 - g protein-coupled receptor 4, Trpc4 - transient receptor pote…	BP	DOWN
GO:0030155	regulation of cell adhesion	8.53e-12	1.54e-09	1.57	9959	434	2546	174	[Magi2 - membrane associated guanylate kinase, ww and pdz domain containing 2, Epb4.1l5 - erythrocyte membrane protein band 4.1 like 5, Ppp1r12a - protein phosphatase 1, regulatory subunit 12a, Socs1 - suppressor of cytokine signaling 1, Abi3bp - abi family, member 3 (nesh) binding protein, Ptprj - protein tyrosine phosphatase, receptor type, j, Lag3 - lymphocyte-activation gene 3, Ptpru - protei…	BP	DOWN
GO:0009617	response to bacterium	9.25e-12	1.65e-09	2.01	9959	150	2546	77	[C5ar1 - complement component 5a receptor 1, Naip6 - nlr family, apoptosis inhibitory protein 6, Gpc3 - glypican 3, Chd7 - chromodomain helicase dna binding protein 7, Scn7a - sodium channel, voltage-gated, type vii, alpha, Adamts9 - adam metallopeptidase with thrombospondin type 1 motif, 9, Il23a - interleukin 23, alpha subunit p19, Nexn - nexilin (f actin binding protein), Gbp4 - guanylate bind…	BP	DOWN
GO:0072503	cellular divalent inorganic cation homeostasis	1.4e-11	2.47e-09	1.77	9959	246	2546	111	[Jph2 - junctophilin 2, Adcy5 - adenylate cyclase 5, C5ar1 - complement component 5a receptor 1, Hrc - histidine rich calcium binding protein, Cxcr4 - chemokine (c-x-c motif) receptor 4, Nos1 - nitric oxide synthase 1, neuronal, Asph - aspartate-beta-hydroxylase, Adcyap1r1 - adenylate cyclase activating polypeptide 1 receptor 1, Gpr4 - g protein-coupled receptor 4, Trpc4 - transient receptor pote…	BP	DOWN
GO:0048856	anatomical structure development	1.84e-11	3.2e-09	1.23	9959	1960	2546	618	[Rom1 - retinal outer segment membrane protein 1, Fgf13 - fibroblast growth factor 13, Hopx - hop homeobox, Acadm - acyl-coa dehydrogenase, c-4 to c-12 straight chain, Mfsd2a - major facilitator superfamily domain containing 2a, Cxcr4 - chemokine (c-x-c motif) receptor 4, Creb5 - camp responsive element binding protein 5, Speg - speg complex locus, Chst3 - carbohydrate (chondroitin 6) sulfotransf…	BP	DOWN
GO:0007204	positive regulation of cytosolic calcium ion concentration	1.89e-11	3.25e-09	2.03	9959	141	2546	73	[Jph2 - junctophilin 2, Adcy5 - adenylate cyclase 5, Jph3 - junctophilin 3, Ptk2b - protein tyrosine kinase 2 beta, C5ar1 - complement component 5a receptor 1, Cxcr4 - chemokine (c-x-c motif) receptor 4, Asph - aspartate-beta-hydroxylase, Ccrl2 - chemokine (c-c motif) receptor-like 2, Adcyap1r1 - adenylate cyclase activating polypeptide 1 receptor 1, Gpr4 - g protein-coupled receptor 4, Tgm2 - tr…	BP	DOWN
GO:0015672	monovalent inorganic cation transport	1.95e-11	3.31e-09	1.9	9959	179	2546	87	[Fgf13 - fibroblast growth factor 13, Aqp1 - aquaporin 1, Kcnq4 - potassium voltage-gated channel, kqt-like subfamily, member 4, Fxyd1 - fxyd domain-containing ion transport regulator 1, Scn7a - sodium channel, voltage-gated, type vii, alpha, Slc15a2 - solute carrier family 15 (oligopeptide transporter), member 2, Atp5i - atp synthase, h+ transporting, mitochondrial fo complex, subunit e, Slc1a3 …	BP	DOWN
GO:0010469	regulation of signaling receptor activity	2.18e-11	3.65e-09	1.86	9959	196	2546	93	[Jag2 - jagged 2, Ptk2b - protein tyrosine kinase 2 beta, Fgf13 - fibroblast growth factor 13, Pspn - persephin, Amh - anti-mullerian hormone, Hdgfrp3 - hepatoma-derived growth factor, related protein 3, Mapt - microtubule-associated protein tau, LOC100909913 - norrin-like, Nptx1 - neuronal pentraxin i, Ptprj - protein tyrosine phosphatase, receptor type, j, Gdf10 - growth differentiation factor …	BP	DOWN
GO:0006874	cellular calcium ion homeostasis	2.21e-11	3.66e-09	1.78	9959	233	2546	106	[Jph2 - junctophilin 2, Adcy5 - adenylate cyclase 5, C5ar1 - complement component 5a receptor 1, Cxcr4 - chemokine (c-x-c motif) receptor 4, Hrc - histidine rich calcium binding protein, Nos1 - nitric oxide synthase 1, neuronal, Asph - aspartate-beta-hydroxylase, Adcyap1r1 - adenylate cyclase activating polypeptide 1 receptor 1, Gpr4 - g protein-coupled receptor 4, Trpc4 - transient receptor pote…	BP	DOWN
GO:0010647	positive regulation of cell communication	2.38e-11	3.89e-09	1.34	9959	1049	2546	359	[Jph2 - junctophilin 2, Scube3 - signal peptide, cub domain, egf-like 3, Peli2 - pellino e3 ubiquitin protein ligase family member 2, Ptprj - protein tyrosine phosphatase, receptor type, j, Ppp2r1b - protein phosphatase 2, regulatory subunit a, beta, Adcyap1r1 - adenylate cyclase activating polypeptide 1 receptor 1, Gdf10 - growth differentiation factor 10, Ror1 - receptor tyrosine kinase-like or…	BP	DOWN
GO:0034764	positive regulation of transmembrane transport	2.53e-11	4.09e-09	2	9959	147	2546	75	[Jph2 - junctophilin 2, Gpc3 - glypican 3, Asph - aspartate-beta-hydroxylase, Nos1 - nitric oxide synthase 1, neuronal, Fxyd1 - fxyd domain-containing ion transport regulator 1, Ctss - cathepsin s, Rnf207 - ring finger protein 207, Akap7 - a kinase (prka) anchor protein 7, Nlgn3 - neuroligin 3, S100a1 - s100 calcium binding protein a1, Cx3cl1 - chemokine (c-x3-c motif) ligand 1, Ank3 - ankyrin 3,…	BP	DOWN
GO:0022898	regulation of transmembrane transporter activity	2.89e-11	4.63e-09	1.98	9959	150	2546	76	[Jph2 - junctophilin 2, Ptk2b - protein tyrosine kinase 2 beta, Jph3 - junctophilin 3, Hrc - histidine rich calcium binding protein, Asph - aspartate-beta-hydroxylase, Fxyd1 - fxyd domain-containing ion transport regulator 1, Ctss - cathepsin s, Rnf207 - ring finger protein 207, Vamp2 - vesicle-associated membrane protein 2, Akap7 - a kinase (prka) anchor protein 7, Nlgn3 - neuroligin 3, S100a1 -…	BP	DOWN
GO:0055085	transmembrane transport	3.14e-11	4.97e-09	1.48	9959	551	2546	209	[Jph2 - junctophilin 2, Kcnq4 - potassium voltage-gated channel, kqt-like subfamily, member 4, Mfsd2a - major facilitator superfamily domain containing 2a, Slc15a2 - solute carrier family 15 (oligopeptide transporter), member 2, Sv2c - synaptic vesicle glycoprotein 2c, Trpc4 - transient receptor potential cation channel, subfamily c, member 4, Trpm4 - transient receptor potential cation channel, …	BP	DOWN
GO:0016477	cell migration	3.27e-11	5.11e-09	1.53	9959	462	2546	181	[Cdk5r1 - cyclin-dependent kinase 5, regulatory subunit 1 (p35), Fgf13 - fibroblast growth factor 13, Sema5b - sema domain, seven thrombospondin repeats (type 1 and type 1-like), transmembrane domain (tm) and short cytoplasmic domain, (semaphorin) 5b, Epb4.1l5 - erythrocyte membrane protein band 4.1 like 5, Nos3 - nitric oxide synthase 3, endothelial cell, C5ar1 - complement component 5a receptor…	BP	DOWN
GO:0032412	regulation of ion transmembrane transporter activity	3.38e-11	5.22e-09	2	9959	145	2546	74	[Jph2 - junctophilin 2, Ptk2b - protein tyrosine kinase 2 beta, Jph3 - junctophilin 3, Hrc - histidine rich calcium binding protein, Asph - aspartate-beta-hydroxylase, Fxyd1 - fxyd domain-containing ion transport regulator 1, Ctss - cathepsin s, Rnf207 - ring finger protein 207, Vamp2 - vesicle-associated membrane protein 2, Akap7 - a kinase (prka) anchor protein 7, Nlgn3 - neuroligin 3, S100a1 -…	BP	DOWN
GO:0030334	regulation of cell migration	3.48e-11	5.32e-09	1.46	9959	600	2546	224	[Sema5b - sema domain, seven thrombospondin repeats (type 1 and type 1-like), transmembrane domain (tm) and short cytoplasmic domain, (semaphorin) 5b, Cxcr4 - chemokine (c-x-c motif) receptor 4, Diaph1 - diaphanous-related formin 1, Ptprj - protein tyrosine phosphatase, receptor type, j, Ptpru - protein tyrosine phosphatase, receptor type, u, Il1rn - interleukin 1 receptor antagonist, Csf1r - col…	BP	DOWN
GO:0051093	negative regulation of developmental process	3.65e-11	5.53e-09	1.44	9959	659	2546	242	[Fgf13 - fibroblast growth factor 13, Cdk5r1 - cyclin-dependent kinase 5, regulatory subunit 1 (p35), Sema5b - sema domain, seven thrombospondin repeats (type 1 and type 1-like), transmembrane domain (tm) and short cytoplasmic domain, (semaphorin) 5b, Pi16 - peptidase inhibitor 16, Hopx - hop homeobox, Socs1 - suppressor of cytokine signaling 1, Gdf10 - growth differentiation factor 10, Ctdsp1 - …	BP	DOWN
GO:0007167	enzyme linked receptor protein signaling pathway	4.14e-11	6.2e-09	1.63	9959	339	2546	141	[Cdk5r1 - cyclin-dependent kinase 5, regulatory subunit 1 (p35), Ddit4 - dna-damage-inducible transcript 4, Blk - b lymphoid tyrosine kinase, Ptprj - protein tyrosine phosphatase, receptor type, j, Npr1 - natriuretic peptide receptor a/guanylate cyclase a (atrionatriuretic peptide receptor a), Ror1 - receptor tyrosine kinase-like orphan receptor 1, Nrros - negative regulator of reactive oxygen sp…	BP	DOWN
GO:0071310	cellular response to organic substance	4.37e-11	6.47e-09	1.32	9959	1136	2546	383	[Vwf - von willebrand factor, Diaph1 - diaphanous-related formin 1, Cxcr4 - chemokine (c-x-c motif) receptor 4, Socs1 - suppressor of cytokine signaling 1, Il1rn - interleukin 1 receptor antagonist, Nr1d1 - nuclear receptor subfamily 1, group d, member 1, Csf1r - colony stimulating factor 1 receptor, Fcgr2b - fc fragment of igg, low affinity iib, receptor (cd32), Ntrk2 - neurotrophic tyrosine kin…	BP	DOWN
GO:0035150	regulation of tube size	4.7e-11	6.89e-09	2.21	9959	99	2546	56	[Agtr1b - angiotensin ii receptor, type 1b, Nos3 - nitric oxide synthase 3, endothelial cell, Nos1 - nitric oxide synthase 1, neuronal, Alox12 - arachidonate 12-lipoxygenase, Npr1 - natriuretic peptide receptor a/guanylate cyclase a (atrionatriuretic peptide receptor a), Grip2 - glutamate receptor interacting protein 2, Sod2 - superoxide dismutase 2, mitochondrial, Cx3cl1 - chemokine (c-x3-c moti…	BP	DOWN
GO:0006954	inflammatory response	5.06e-11	7.34e-09	1.89	9959	176	2546	85	[Agtr1b - angiotensin ii receptor, type 1b, C5ar1 - complement component 5a receptor 1, Naip6 - nlr family, apoptosis inhibitory protein 6, Prkcz - protein kinase c, zeta, Ccrl2 - chemokine (c-c motif) receptor-like 2, Tspan2 - tetraspanin 2, Il1rn - interleukin 1 receptor antagonist, Nrros - negative regulator of reactive oxygen species, Il23a - interleukin 23, alpha subunit p19, Itih4 - inter-a…	BP	DOWN
GO:0023052	signaling	5.51e-11	7.91e-09	1.84	9959	193	2546	91	[Synj2bp - synaptojanin 2 binding protein, Nos1 - nitric oxide synthase 1, neuronal, Sv2c - synaptic vesicle glycoprotein 2c, Efnb3 - ephrin b3, Cx3cl1 - chemokine (c-x3-c motif) ligand 1, Ntrk2 - neurotrophic tyrosine kinase, receptor, type 2, Dlg3 - discs, large homolog 3 (drosophila), Trpm4 - transient receptor potential cation channel, subfamily m, member 4, Grik5 - glutamate receptor, ionotr…	BP	DOWN
GO:0006952	defense response	5.58e-11	7.93e-09	1.56	9959	408	2546	163	[C5ar1 - complement component 5a receptor 1, C1s - complement component 1, s subcomponent, Ddit4 - dna-damage-inducible transcript 4, Tspan2 - tetraspanin 2, Il1rn - interleukin 1 receptor antagonist, Nrros - negative regulator of reactive oxygen species, Il23a - interleukin 23, alpha subunit p19, Tifa - traf-interacting protein with forkhead-associated domain, Apobec1 - apolipoprotein b mrna edi…	BP	DOWN
GO:0034767	positive regulation of ion transmembrane transport	5.91e-11	8.32e-09	2.16	9959	107	2546	59	[Jph2 - junctophilin 2, Nos1 - nitric oxide synthase 1, neuronal, Asph - aspartate-beta-hydroxylase, Fxyd1 - fxyd domain-containing ion transport regulator 1, Ctss - cathepsin s, Rnf207 - ring finger protein 207, Akap7 - a kinase (prka) anchor protein 7, Nlgn3 - neuroligin 3, S100a1 - s100 calcium binding protein a1, Cx3cl1 - chemokine (c-x3-c motif) ligand 1, Ank3 - ankyrin 3, node of ranvier (a…	BP	DOWN
GO:0051924	regulation of calcium ion transport	6.18e-11	8.6e-09	1.93	9959	160	2546	79	[Jph2 - junctophilin 2, Rgs4 - regulator of g-protein signaling 4, Ptk2b - protein tyrosine kinase 2 beta, Jph3 - junctophilin 3, Nos3 - nitric oxide synthase 3, endothelial cell, Cxcr4 - chemokine (c-x-c motif) receptor 4, Diaph1 - diaphanous-related formin 1, Hrc - histidine rich calcium binding protein, Usp2 - ubiquitin specific peptidase 2, Asph - aspartate-beta-hydroxylase, Nos1 - nitric oxi…	BP	DOWN
GO:0002376	immune system process	7.36e-11	1.02e-08	1.42	9959	696	2546	252	[Cxcr4 - chemokine (c-x-c motif) receptor 4, Ptprj - protein tyrosine phosphatase, receptor type, j, Il1rn - interleukin 1 receptor antagonist, Ly86 - lymphocyte antigen 86, Nrros - negative regulator of reactive oxygen species, Atp11c - atpase, class vi, type 11c, Csf1r - colony stimulating factor 1 receptor, Fcgr2b - fc fragment of igg, low affinity iib, receptor (cd32), Rnf19b - ring finger pr…	BP	DOWN
GO:0001505	regulation of neurotransmitter levels	7.81e-11	1.07e-08	1.83	9959	194	2546	91	[Rgs4 - regulator of g-protein signaling 4, Ptk2b - protein tyrosine kinase 2 beta, Ptgis - prostaglandin i2 (prostacyclin) synthase, Ppfia3 - protein tyrosine phosphatase, receptor type, f polypeptide (ptprf), interacting protein (liprin), alpha 3, Nos3 - nitric oxide synthase 3, endothelial cell, Nos1 - nitric oxide synthase 1, neuronal, Nr3c2 - nuclear receptor subfamily 3, group c, member 2, …	BP	DOWN
GO:0050804	modulation of chemical synaptic transmission	9.86e-11	1.33e-08	1.66	9959	300	2546	127	[Kcnq4 - potassium voltage-gated channel, kqt-like subfamily, member 4, Ppfia3 - protein tyrosine phosphatase, receptor type, f polypeptide (ptprf), interacting protein (liprin), alpha 3, Plcb4 - phospholipase c, beta 4, Ntng2 - netrin g2, Nos1 - nitric oxide synthase 1, neuronal, Ngfr - nerve growth factor receptor, Nr3c2 - nuclear receptor subfamily 3, group c, member 2, Akap7 - a kinase (prka)…	BP	DOWN
GO:0050880	regulation of blood vessel size	1.06e-10	1.42e-08	2.2	9959	98	2546	55	[Agtr1b - angiotensin ii receptor, type 1b, Nos3 - nitric oxide synthase 3, endothelial cell, Nos1 - nitric oxide synthase 1, neuronal, Alox12 - arachidonate 12-lipoxygenase, Npr1 - natriuretic peptide receptor a/guanylate cyclase a (atrionatriuretic peptide receptor a), Grip2 - glutamate receptor interacting protein 2, Sod2 - superoxide dismutase 2, mitochondrial, Cx3cl1 - chemokine (c-x3-c moti…	BP	DOWN
GO:0032101	regulation of response to external stimulus	1.06e-10	1.41e-08	1.53	9959	436	2546	171	[Sema5b - sema domain, seven thrombospondin repeats (type 1 and type 1-like), transmembrane domain (tm) and short cytoplasmic domain, (semaphorin) 5b, Hopx - hop homeobox, C5ar1 - complement component 5a receptor 1, Cxcr4 - chemokine (c-x-c motif) receptor 4, Sema3g - sema domain, immunoglobulin domain (ig), short basic domain, secreted, (semaphorin) 3g, Ptprj - protein tyrosine phosphatase, rece…	BP	DOWN
GO:0032409	regulation of transporter activity	1.1e-10	1.45e-08	1.93	9959	156	2546	77	[Jph2 - junctophilin 2, Jph3 - junctophilin 3, Ptk2b - protein tyrosine kinase 2 beta, Hrc - histidine rich calcium binding protein, Asph - aspartate-beta-hydroxylase, Fxyd1 - fxyd domain-containing ion transport regulator 1, Ctss - cathepsin s, Rnf207 - ring finger protein 207, Vamp2 - vesicle-associated membrane protein 2, Akap7 - a kinase (prka) anchor protein 7, Nlgn3 - neuroligin 3, S100a1 -…	BP	DOWN
GO:0070098	chemokine-mediated signaling pathway	1.27e-10	1.65e-08	3.33	9959	27	2546	23	[Ptk2b - protein tyrosine kinase 2 beta, Ccl4 - chemokine (c-c motif) ligand 4, Cxcl11 - chemokine (c-x-c motif) ligand 11, Ccl21 - chemokine (c-c motif) ligand 21, Cxcl1 - chemokine (c-x-c motif) ligand 1, Cxcr4 - chemokine (c-x-c motif) receptor 4, Ccl2 - chemokine (c-c motif) ligand 2, Ccrl2 - chemokine (c-c motif) receptor-like 2, Ccl19 - chemokine (c-c motif) ligand 19, Cxcl2 - chemokine (c-…	BP	DOWN
GO:0099177	regulation of trans-synaptic signaling	1.28e-10	1.66e-08	1.65	9959	301	2546	127	[Kcnq4 - potassium voltage-gated channel, kqt-like subfamily, member 4, Ppfia3 - protein tyrosine phosphatase, receptor type, f polypeptide (ptprf), interacting protein (liprin), alpha 3, Plcb4 - phospholipase c, beta 4, Ntng2 - netrin g2, Nos1 - nitric oxide synthase 1, neuronal, Ngfr - nerve growth factor receptor, Nr3c2 - nuclear receptor subfamily 3, group c, member 2, Akap7 - a kinase (prka)…	BP	DOWN
GO:0006955	immune response	1.29e-10	1.65e-08	1.66	9959	295	2546	125	[Cxcr4 - chemokine (c-x-c motif) receptor 4, C1s - complement component 1, s subcomponent, Il1rn - interleukin 1 receptor antagonist, Ly86 - lymphocyte antigen 86, Nrros - negative regulator of reactive oxygen species, Cxcl14 - chemokine (c-x-c motif) ligand 14, Il23a - interleukin 23, alpha subunit p19, Cfh - complement factor h, Tifa - traf-interacting protein with forkhead-associated domain, C…	BP	DOWN
GO:2000145	regulation of cell motility	1.39e-10	1.76e-08	1.44	9959	624	2546	229	[Sema5b - sema domain, seven thrombospondin repeats (type 1 and type 1-like), transmembrane domain (tm) and short cytoplasmic domain, (semaphorin) 5b, Cxcr4 - chemokine (c-x-c motif) receptor 4, Diaph1 - diaphanous-related formin 1, Ptprj - protein tyrosine phosphatase, receptor type, j, Ptpru - protein tyrosine phosphatase, receptor type, u, Il1rn - interleukin 1 receptor antagonist, Csf1r - col…	BP	DOWN
GO:0090257	regulation of muscle system process	1.47e-10	1.85e-08	1.93	9959	154	2546	76	[Rgs4 - regulator of g-protein signaling 4, Trim63 - tripartite motif containing 63, e3 ubiquitin protein ligase, Nfatc1 - nuclear factor of activated t-cells, cytoplasmic, calcineurin-dependent 1, Pi16 - peptidase inhibitor 16, Cacna1h - calcium channel, voltage-dependent, t type, alpha 1h subunit, Nos3 - nitric oxide synthase 3, endothelial cell, Hrc - histidine rich calcium binding protein, Ep…	BP	DOWN
GO:0023056	positive regulation of signaling	1.57e-10	1.96e-08	1.32	9959	1056	2546	357	[Jph2 - junctophilin 2, Scube3 - signal peptide, cub domain, egf-like 3, Peli2 - pellino e3 ubiquitin protein ligase family member 2, Ppp2r1b - protein phosphatase 2, regulatory subunit a, beta, Ptprj - protein tyrosine phosphatase, receptor type, j, Adcyap1r1 - adenylate cyclase activating polypeptide 1 receptor 1, Gdf10 - growth differentiation factor 10, Ror1 - receptor tyrosine kinase-like or…	BP	DOWN
GO:0046683	response to organophosphorus	1.65e-10	2.04e-08	2.02	9959	130	2546	67	[Aqp1 - aquaporin 1, Ptk2b - protein tyrosine kinase 2 beta, Nos3 - nitric oxide synthase 3, endothelial cell, Ep300 - e1a binding protein p300, C1s - complement component 1, s subcomponent, Asph - aspartate-beta-hydroxylase, Dusp1 - dual specificity phosphatase 1, P2rx5 - purinergic receptor p2x, ligand-gated ion channel, 5, Fosb - fbj osteosarcoma oncogene b, Akap7 - a kinase (prka) anchor prot…	BP	DOWN
GO:0003018	vascular process in circulatory system	1.79e-10	2.19e-08	2.07	9959	117	2546	62	[Agtr1b - angiotensin ii receptor, type 1b, Nos3 - nitric oxide synthase 3, endothelial cell, Nos1 - nitric oxide synthase 1, neuronal, Alox12 - arachidonate 12-lipoxygenase, Ptprj - protein tyrosine phosphatase, receptor type, j, Npr1 - natriuretic peptide receptor a/guanylate cyclase a (atrionatriuretic peptide receptor a), Grip2 - glutamate receptor interacting protein 2, Sod2 - superoxide dis…	BP	DOWN
GO:0070887	cellular response to chemical stimulus	1.8e-10	2.18e-08	1.28	9959	1332	2546	436	[Cxcr4 - chemokine (c-x-c motif) receptor 4, Il1rn - interleukin 1 receptor antagonist, Syt11 - synaptotagmin xi, Trpm4 - transient receptor potential cation channel, subfamily m, member 4, Agtr2 - angiotensin ii receptor, type 2, Ank3 - ankyrin 3, node of ranvier (ankyrin g), Trpm2 - transient receptor potential cation channel, subfamily m, member 2, Bnip3 - bcl2/adenovirus e1b interacting prote…	BP	DOWN
GO:0051050	positive regulation of transport	2.16e-10	2.6e-08	1.42	9959	643	2546	234	[Cdk5r1 - cyclin-dependent kinase 5, regulatory subunit 1 (p35), Jph2 - junctophilin 2, Exph5 - exophilin 5, Cxcr4 - chemokine (c-x-c motif) receptor 4, Ptprj - protein tyrosine phosphatase, receptor type, j, Adcyap1r1 - adenylate cyclase activating polypeptide 1 receptor 1, Rnf207 - ring finger protein 207, Nlgn3 - neuroligin 3, Fcgr2b - fc fragment of igg, low affinity iib, receptor (cd32), Csf…	BP	DOWN
GO:0051707	response to other organism	2.16e-10	2.58e-08	1.64	9959	303	2546	127	[Gli2 - gli family zinc finger 2, C5ar1 - complement component 5a receptor 1, Ddit4 - dna-damage-inducible transcript 4, Chd7 - chromodomain helicase dna binding protein 7, Il23a - interleukin 23, alpha subunit p19, Apobec1 - apolipoprotein b mrna editing enzyme, catalytic polypeptide 1, Gbp4 - guanylate binding protein 4, Fcgr2b - fc fragment of igg, low affinity iib, receptor (cd32), Mx1 - myxo…	BP	DOWN
GO:0003013	circulatory system process	2.19e-10	2.58e-08	1.98	9959	136	2546	69	[Agtr1b - angiotensin ii receptor, type 1b, Acvrl1 - activin a receptor type ii-like 1, Nos3 - nitric oxide synthase 3, endothelial cell, Nos1 - nitric oxide synthase 1, neuronal, Chd7 - chromodomain helicase dna binding protein 7, Alox12 - arachidonate 12-lipoxygenase, Ptprj - protein tyrosine phosphatase, receptor type, j, Npr1 - natriuretic peptide receptor a/guanylate cyclase a (atrionatriure…	BP	DOWN
GO:0048878	chemical homeostasis	3.06e-10	3.59e-08	1.43	9959	622	2546	227	[Jph2 - junctophilin 2, Cxcr4 - chemokine (c-x-c motif) receptor 4, Hrc - histidine rich calcium binding protein, Adcyap1r1 - adenylate cyclase activating polypeptide 1 receptor 1, Nr3c2 - nuclear receptor subfamily 3, group c, member 2, Trpc4 - transient receptor potential cation channel, subfamily c, member 4, Rbp1 - retinol binding protein 1, cellular, Nr1d1 - nuclear receptor subfamily 1, gro…	BP	DOWN
GO:0006928	movement of cell or subcellular component	4.92e-10	5.73e-08	1.4	9959	701	2546	250	[Fgf13 - fibroblast growth factor 13, Cdk5r1 - cyclin-dependent kinase 5, regulatory subunit 1 (p35), Sema5b - sema domain, seven thrombospondin repeats (type 1 and type 1-like), transmembrane domain (tm) and short cytoplasmic domain, (semaphorin) 5b, Cxcr4 - chemokine (c-x-c motif) receptor 4, Il1rn - interleukin 1 receptor antagonist, Fmnl1 - formin-like 1, Dnah12 - dynein, axonemal, heavy chai…	BP	DOWN
GO:1901379	regulation of potassium ion transmembrane transport	5.2e-10	5.99e-08	2.56	9959	55	2546	36	[Rgs4 - regulator of g-protein signaling 4, Kcnh2 - potassium voltage-gated channel, subfamily h (eag-related), member 2, Agrn - agrin, Fxyd1 - fxyd domain-containing ion transport regulator 1, Kcnab1 - potassium voltage-gated channel, shaker-related subfamily, beta member 1, Lrrc38 - leucine rich repeat containing 38, Rnf207 - ring finger protein 207, Vamp2 - vesicle-associated membrane protein …	BP	DOWN
GO:0097746	regulation of blood vessel diameter	5.4e-10	6.18e-08	2.19	9959	91	2546	51	[Agtr1b - angiotensin ii receptor, type 1b, Nos1 - nitric oxide synthase 1, neuronal, Alox12 - arachidonate 12-lipoxygenase, Grip2 - glutamate receptor interacting protein 2, Sod2 - superoxide dismutase 2, mitochondrial, Cx3cl1 - chemokine (c-x3-c motif) ligand 1, Trpm4 - transient receptor potential cation channel, subfamily m, member 4, Agtr2 - angiotensin ii receptor, type 2, Gpx1 - glutathion…	BP	DOWN
GO:0035296	regulation of tube diameter	5.4e-10	6.13e-08	2.19	9959	91	2546	51	[Agtr1b - angiotensin ii receptor, type 1b, Nos1 - nitric oxide synthase 1, neuronal, Alox12 - arachidonate 12-lipoxygenase, Grip2 - glutamate receptor interacting protein 2, Sod2 - superoxide dismutase 2, mitochondrial, Cx3cl1 - chemokine (c-x3-c motif) ligand 1, Gpx1 - glutathione peroxidase 1, Agtr2 - angiotensin ii receptor, type 2, Trpm4 - transient receptor potential cation channel, subfami…	BP	DOWN
GO:0043266	regulation of potassium ion transport	5.55e-10	6.25e-08	2.38	9959	69	2546	42	[Ptk2b - protein tyrosine kinase 2 beta, Rgs4 - regulator of g-protein signaling 4, Agrn - agrin, Kcnh2 - potassium voltage-gated channel, subfamily h (eag-related), member 2, Cxcl1 - chemokine (c-x-c motif) ligand 1, Nos3 - nitric oxide synthase 3, endothelial cell, Plcb4 - phospholipase c, beta 4, Nos1 - nitric oxide synthase 1, neuronal, Fxyd1 - fxyd domain-containing ion transport regulator 1…	BP	DOWN
GO:0006937	regulation of muscle contraction	7.11e-10	7.94e-08	2.2	9959	89	2546	50	[Cacna1h - calcium channel, voltage-dependent, t type, alpha 1h subunit, Fxyd1 - fxyd domain-containing ion transport regulator 1, Tnnc1 - troponin c type 1 (slow), Mrvi1 - murine retrovirus integration site 1 homolog, Rnf207 - ring finger protein 207, Tnnc2 - troponin c type 2 (fast), Trpm4 - transient receptor potential cation channel, subfamily m, member 4, Akap6 - a kinase (prka) anchor prote…	BP	DOWN
GO:0055065	metal ion homeostasis	8.34e-10	9.25e-08	1.58	9959	336	2546	136	[Jph2 - junctophilin 2, Adcy5 - adenylate cyclase 5, C5ar1 - complement component 5a receptor 1, Hrc - histidine rich calcium binding protein, Cxcr4 - chemokine (c-x-c motif) receptor 4, Asph - aspartate-beta-hydroxylase, Nos1 - nitric oxide synthase 1, neuronal, Adcyap1r1 - adenylate cyclase activating polypeptide 1 receptor 1, Nr3c2 - nuclear receptor subfamily 3, group c, member 2, Gpr4 - g pr…	BP	DOWN
GO:0002684	positive regulation of immune system process	9.12e-10	1e-07	1.48	9959	472	2546	179	[Arid5a - at rich interactive domain 5a (mrf1 like), C5ar1 - complement component 5a receptor 1, Klf10 - kruppel-like factor 10, C1s - complement component 1, s subcomponent, Socs1 - suppressor of cytokine signaling 1, Blk - b lymphoid tyrosine kinase, Ptprj - protein tyrosine phosphatase, receptor type, j, Lag3 - lymphocyte-activation gene 3, Il13ra1 - interleukin 13 receptor, alpha 1, Coro1a - …	BP	DOWN
GO:0051282	regulation of sequestering of calcium ion	9.28e-10	1.01e-07	2.24	9959	82	2546	47	[Ptk2b - protein tyrosine kinase 2 beta, Jph3 - junctophilin 3, Jph2 - junctophilin 2, Aplnr - apelin receptor, Plcb2 - phospholipase c, beta 2, Dmd - dystrophin, Diaph1 - diaphanous-related formin 1, Hrc - histidine rich calcium binding protein, Asph - aspartate-beta-hydroxylase, Chd7 - chromodomain helicase dna binding protein 7, Ptprc - protein tyrosine phosphatase, receptor type, c, Coro1a - …	BP	DOWN
GO:0045596	negative regulation of cell differentiation	1.02e-09	1.1e-07	1.48	9959	479	2546	181	[Fgf13 - fibroblast growth factor 13, Cdk5r1 - cyclin-dependent kinase 5, regulatory subunit 1 (p35), Gli2 - gli family zinc finger 2, Sema5b - sema domain, seven thrombospondin repeats (type 1 and type 1-like), transmembrane domain (tm) and short cytoplasmic domain, (semaphorin) 5b, Pi16 - peptidase inhibitor 16, Hopx - hop homeobox, Ngfr - nerve growth factor receptor, Sema3g - sema domain, imm…	BP	DOWN
GO:0050801	ion homeostasis	1.34e-09	1.44e-07	1.51	9959	426	2546	164	[Adcy5 - adenylate cyclase 5, Jph2 - junctophilin 2, C5ar1 - complement component 5a receptor 1, Cxcr4 - chemokine (c-x-c motif) receptor 4, Hrc - histidine rich calcium binding protein, Asph - aspartate-beta-hydroxylase, Nos1 - nitric oxide synthase 1, neuronal, Ngfr - nerve growth factor receptor, Adcyap1r1 - adenylate cyclase activating polypeptide 1 receptor 1, Gpr4 - g protein-coupled recept…	BP	DOWN
GO:1901700	response to oxygen-containing compound	1.39e-09	1.48e-07	1.29	9959	1167	2546	384	[Vwf - von willebrand factor, Socs1 - suppressor of cytokine signaling 1, Adcyap1r1 - adenylate cyclase activating polypeptide 1 receptor 1, Il1rn - interleukin 1 receptor antagonist, Nr1d1 - nuclear receptor subfamily 1, group d, member 1, Fcgr2b - fc fragment of igg, low affinity iib, receptor (cd32), Oxct1 - 3-oxoacid coa transferase 1, Ntrk2 - neurotrophic tyrosine kinase, receptor, type 2, M…	BP	DOWN
GO:0007611	learning or memory	1.7e-09	1.8e-07	1.83	9959	169	2546	79	[Fgf13 - fibroblast growth factor 13, Jph3 - junctophilin 3, Ep300 - e1a binding protein p300, Mapt - microtubule-associated protein tau, Prkcz - protein kinase c, zeta, Thra - thyroid hormone receptor alpha, Il1rn - interleukin 1 receptor antagonist, Nlgn3 - neuroligin 3, Sts - steroid sulfatase (microsomal), isozyme s, Ntrk2 - neurotrophic tyrosine kinase, receptor, type 2, Rcan1 - regulator of…	BP	DOWN
GO:0002682	regulation of immune system process	2.39e-09	2.51e-07	1.37	9959	728	2546	255	[Socs1 - suppressor of cytokine signaling 1, Ptprj - protein tyrosine phosphatase, receptor type, j, Il13ra1 - interleukin 13 receptor, alpha 1, Rbp1 - retinol binding protein 1, cellular, Nr1d1 - nuclear receptor subfamily 1, group d, member 1, Atp11c - atpase, class vi, type 11c, Fcgr2b - fc fragment of igg, low affinity iib, receptor (cd32), Csf1r - colony stimulating factor 1 receptor, Trpm4 …	BP	DOWN
GO:0006942	regulation of striated muscle contraction	2.8e-09	2.92e-07	2.49	9959	55	2546	35	[Agrn - agrin, Dmd - dystrophin, Cacna1h - calcium channel, voltage-dependent, t type, alpha 1h subunit, Fxyd1 - fxyd domain-containing ion transport regulator 1, Rnf207 - ring finger protein 207, Casq1 - calsequestrin 1 (fast-twitch, skeletal muscle), Trpm4 - transient receptor potential cation channel, subfamily m, member 4, Akap6 - a kinase (prka) anchor protein 6, Arg2 - arginase 2, Myl3 - my…	BP	DOWN
GO:0006875	cellular metal ion homeostasis	3.61e-09	3.74e-07	1.6	9959	296	2546	121	[Jph2 - junctophilin 2, Adcy5 - adenylate cyclase 5, C5ar1 - complement component 5a receptor 1, Hrc - histidine rich calcium binding protein, Cxcr4 - chemokine (c-x-c motif) receptor 4, Nos1 - nitric oxide synthase 1, neuronal, Asph - aspartate-beta-hydroxylase, Adcyap1r1 - adenylate cyclase activating polypeptide 1 receptor 1, Nr3c2 - nuclear receptor subfamily 3, group c, member 2, Gpr4 - g pr…	BP	DOWN
GO:0040012	regulation of locomotion	3.98e-09	4.09e-07	1.38	9959	671	2546	237	[Sema5b - sema domain, seven thrombospondin repeats (type 1 and type 1-like), transmembrane domain (tm) and short cytoplasmic domain, (semaphorin) 5b, Cxcr4 - chemokine (c-x-c motif) receptor 4, Diaph1 - diaphanous-related formin 1, Ptprj - protein tyrosine phosphatase, receptor type, j, Ptpru - protein tyrosine phosphatase, receptor type, u, Il1rn - interleukin 1 receptor antagonist, Csf1r - col…	BP	DOWN
GO:0042127	regulation of cell proliferation	3.99e-09	4.07e-07	1.3	9959	1019	2546	339	[Ptprj - protein tyrosine phosphatase, receptor type, j, Il13ra1 - interleukin 13 receptor, alpha 1, Ptpru - protein tyrosine phosphatase, receptor type, u, Nr3c2 - nuclear receptor subfamily 3, group c, member 2, Nr1d1 - nuclear receptor subfamily 1, group d, member 1, Fcgr2b - fc fragment of igg, low affinity iib, receptor (cd32), Csf1r - colony stimulating factor 1 receptor, Ntrk2 - neurotroph…	BP	DOWN
GO:0022603	regulation of anatomical structure morphogenesis	4.69e-09	4.75e-07	1.37	9959	709	2546	248	[Fgf13 - fibroblast growth factor 13, Cdk5r1 - cyclin-dependent kinase 5, regulatory subunit 1 (p35), Sema5b - sema domain, seven thrombospondin repeats (type 1 and type 1-like), transmembrane domain (tm) and short cytoplasmic domain, (semaphorin) 5b, Cxcr4 - chemokine (c-x-c motif) receptor 4, Diaph1 - diaphanous-related formin 1, Il1rn - interleukin 1 receptor antagonist, Fmnl1 - formin-like 1,…	BP	DOWN
GO:0055080	cation homeostasis	4.8e-09	4.82e-07	1.52	9959	372	2546	145	[Jph2 - junctophilin 2, Adcy5 - adenylate cyclase 5, C5ar1 - complement component 5a receptor 1, Hrc - histidine rich calcium binding protein, Cxcr4 - chemokine (c-x-c motif) receptor 4, Nos1 - nitric oxide synthase 1, neuronal, Asph - aspartate-beta-hydroxylase, Adcyap1r1 - adenylate cyclase activating polypeptide 1 receptor 1, Nr3c2 - nuclear receptor subfamily 3, group c, member 2, Gpr4 - g pr…	BP	DOWN
GO:0050890	cognition	5.65e-09	5.64e-07	1.76	9959	187	2546	84	[Fgf13 - fibroblast growth factor 13, Jph3 - junctophilin 3, Ep300 - e1a binding protein p300, Mapt - microtubule-associated protein tau, Prkcz - protein kinase c, zeta, Chd7 - chromodomain helicase dna binding protein 7, Thra - thyroid hormone receptor alpha, Il1rn - interleukin 1 receptor antagonist, Nlgn3 - neuroligin 3, Sts - steroid sulfatase (microsomal), isozyme s, Ntrk2 - neurotrophic tyr…	BP	DOWN
GO:0030593	neutrophil chemotaxis	6.04e-09	5.99e-07	2.88	9959	34	2546	25	[Nckap1l - nck associated protein 1 like, C5ar1 - complement component 5a receptor 1, Cxcl1 - chemokine (c-x-c motif) ligand 1, Il1rn - interleukin 1 receptor antagonist, Ccl6 - chemokine (c-c motif) ligand 6, Cx3cl1 - chemokine (c-x3-c motif) ligand 1, Il1b - interleukin 1 beta, Pf4 - platelet factor 4, Ccl12 - chemokine (c-c motif) ligand 12, Vav1 - vav 1 guanine nucleotide exchange factor, Cxc…	BP	DOWN
GO:0070588	calcium ion transmembrane transport	6.57e-09	6.47e-07	2.08	9959	96	2546	51	[Jph3 - junctophilin 3, Jph2 - junctophilin 2, Cacna1h - calcium channel, voltage-dependent, t type, alpha 1h subunit, Asph - aspartate-beta-hydroxylase, Trpc4 - transient receptor potential cation channel, subfamily c, member 4, Trpv1 - transient receptor potential cation channel, subfamily v, member 1, Trpm4 - transient receptor potential cation channel, subfamily m, member 4, Trpm2 - transient…	BP	DOWN
GO:0051046	regulation of secretion	6.74e-09	6.59e-07	1.46	9959	473	2546	176	[Adcy5 - adenylate cyclase 5, Exph5 - exophilin 5, Arid5a - at rich interactive domain 5a (mrf1 like), Nos1 - nitric oxide synthase 1, neuronal, Chd7 - chromodomain helicase dna binding protein 7, Blk - b lymphoid tyrosine kinase, Socs1 - suppressor of cytokine signaling 1, Nr3c2 - nuclear receptor subfamily 3, group c, member 2, Il1rn - interleukin 1 receptor antagonist, Nr1d1 - nuclear receptor…	BP	DOWN
GO:0098771	inorganic ion homeostasis	6.79e-09	6.59e-07	1.51	9959	380	2546	147	[Jph2 - junctophilin 2, Adcy5 - adenylate cyclase 5, C5ar1 - complement component 5a receptor 1, Cxcr4 - chemokine (c-x-c motif) receptor 4, Hrc - histidine rich calcium binding protein, Nos1 - nitric oxide synthase 1, neuronal, Asph - aspartate-beta-hydroxylase, Adcyap1r1 - adenylate cyclase activating polypeptide 1 receptor 1, Nr3c2 - nuclear receptor subfamily 3, group c, member 2, Gpr4 - g pr…	BP	DOWN
GO:0032496	response to lipopolysaccharide	7.16e-09	6.9e-07	1.66	9959	241	2546	102	[Vwf - von willebrand factor, Arid5a - at rich interactive domain 5a (mrf1 like), Nos3 - nitric oxide synthase 3, endothelial cell, C5ar1 - complement component 5a receptor 1, Nos1 - nitric oxide synthase 1, neuronal, Ngfr - nerve growth factor receptor, Socs1 - suppressor of cytokine signaling 1, Il1rn - interleukin 1 receptor antagonist, Cfh - complement factor h, Nr1d1 - nuclear receptor subfa…	BP	DOWN
GO:2001259	positive regulation of cation channel activity	7.63e-09	7.31e-07	2.61	9959	45	2546	30	[Jph2 - junctophilin 2, Stac - sh3 and cysteine rich domain, Asph - aspartate-beta-hydroxylase, Ctss - cathepsin s, Lrrc38 - leucine rich repeat containing 38, Rnf207 - ring finger protein 207, Akap7 - a kinase (prka) anchor protein 7, Nlgn3 - neuroligin 3, Casq1 - calsequestrin 1 (fast-twitch, skeletal muscle), S100a1 - s100 calcium binding protein a1, Ank3 - ankyrin 3, node of ranvier (ankyrin …	BP	DOWN
GO:0048522	positive regulation of cellular process	8.05e-09	7.66e-07	1.14	9959	3324	2546	967	[Cbln2 - cerebellin 2 precursor, Hopx - hop homeobox, Cxcr4 - chemokine (c-x-c motif) receptor 4, Peli2 - pellino e3 ubiquitin protein ligase family member 2, Creb5 - camp responsive element binding protein 5, Adcyap1r1 - adenylate cyclase activating polypeptide 1 receptor 1, Rnf207 - ring finger protein 207, Ly86 - lymphocyte antigen 86, Il1rn - interleukin 1 receptor antagonist, Nlgn3 - neuroli…	BP	DOWN
ing 1, Bag3 - bcl2-associated athanogene 3, Rtn4r - reticulon 4 receptor, Slx1b - slx1 structure-specific endonuclease subunit homolog b (s. cerevisiae), Tlr3 - toll-like receptor 3, Rgs4 - regulator of g-protein signaling 4, Hlx - h2.0-like homeobox, Ier2 - immediate early response 2, Mapt - microtubule-associated protein tau, Cyfip2 - cytoplasmic fmr1 interacting protein 2, Alox12 - arachidonat…										BP	DOWN
GO:0009653	anatomical structure morphogenesis	8.24e-09	7.78e-07	1.32	9959	866	2546	293	[Rom1 - retinal outer segment membrane protein 1, Rasip1 - ras interacting protein 1, Kcnq4 - potassium voltage-gated channel, kqt-like subfamily, member 4, Ntng2 - netrin g2, Cxcr4 - chemokine (c-x-c motif) receptor 4, Cap2 - cap, adenylate cyclase-associated protein, 2 (yeast), Bcl6 - b-cell cll/lymphoma 6, Agtr2 - angiotensin ii receptor, type 2, Ank3 - ankyrin 3, node of ranvier (ankyrin g), …	BP	DOWN
GO:0009719	response to endogenous stimulus	8.29e-09	7.78e-07	1.3	9959	966	2546	322	[Acadm - acyl-coa dehydrogenase, c-4 to c-12 straight chain, Diaph1 - diaphanous-related formin 1, Socs1 - suppressor of cytokine signaling 1, Adcyap1r1 - adenylate cyclase activating polypeptide 1 receptor 1, Gdf10 - growth differentiation factor 10, Ptpru - protein tyrosine phosphatase, receptor type, u, Il1rn - interleukin 1 receptor antagonist, Nr1d1 - nuclear receptor subfamily 1, group d, m…	BP	DOWN
GO:1990266	neutrophil migration	1.25e-08	1.16e-06	2.71	9959	39	2546	27	[Nckap1l - nck associated protein 1 like, Cxcl1 - chemokine (c-x-c motif) ligand 1, C5ar1 - complement component 5a receptor 1, Il1rn - interleukin 1 receptor antagonist, Ccl6 - chemokine (c-c motif) ligand 6, Cx3cl1 - chemokine (c-x3-c motif) ligand 1, Dapk2 - death-associated protein kinase 2, Il1b - interleukin 1 beta, Pf4 - platelet factor 4, Ccl12 - chemokine (c-c motif) ligand 12, Vav1 - va…	BP	DOWN
GO:0050806	positive regulation of synaptic transmission	1.27e-08	1.17e-06	2.11	9959	87	2546	47	[Ptk2b - protein tyrosine kinase 2 beta, Rgs4 - regulator of g-protein signaling 4, Nrgn - neurogranin, Prkcz - protein kinase c, zeta, Nos1 - nitric oxide synthase 1, neuronal, Ngfr - nerve growth factor receptor, Rasgrf2 - ras protein-specific guanine nucleotide-releasing factor 2, S100b - s100 calcium binding protein b, Grip2 - glutamate receptor interacting protein 2, Vamp2 - vesicle-associat…	BP	DOWN
GO:0002027	regulation of heart rate	1.27e-08	1.17e-06	2.33	9959	62	2546	37	[Rgs4 - regulator of g-protein signaling 4, Gch1 - gtp cyclohydrolase 1, Kcnh2 - potassium voltage-gated channel, subfamily h (eag-related), member 2, Dmd - dystrophin, Scn3b - sodium channel, voltage-gated, type iii, beta, Popdc2 - popeye domain containing 2, Hrc - histidine rich calcium binding protein, Cacna1g - calcium channel, voltage-dependent, t type, alpha 1g subunit, Trpv1 - transient re…	BP	DOWN
GO:0002237	response to molecule of bacterial origin	1.55e-08	1.42e-06	1.63	9959	247	2546	103	[Vwf - von willebrand factor, C5ar1 - complement component 5a receptor 1, Nos3 - nitric oxide synthase 3, endothelial cell, Arid5a - at rich interactive domain 5a (mrf1 like), Nos1 - nitric oxide synthase 1, neuronal, Ngfr - nerve growth factor receptor, Socs1 - suppressor of cytokine signaling 1, Il1rn - interleukin 1 receptor antagonist, Cfh - complement factor h, Nr1d1 - nuclear receptor subfa…	BP	DOWN
GO:0022407	regulation of cell-cell adhesion	1.59e-08	1.45e-06	1.65	9959	232	2546	98	[Magi2 - membrane associated guanylate kinase, ww and pdz domain containing 2, Epb4.1l5 - erythrocyte membrane protein band 4.1 like 5, Socs1 - suppressor of cytokine signaling 1, Lag3 - lymphocyte-activation gene 3, Ptpru - protein tyrosine phosphatase, receptor type, u, Il1rn - interleukin 1 receptor antagonist, Coro1a - coronin, actin binding protein 1a, Il23a - interleukin 23, alpha subunit p…	BP	DOWN
GO:0055082	cellular chemical homeostasis	1.68e-08	1.52e-06	1.47	9959	423	2546	159	[Adcy5 - adenylate cyclase 5, Jph2 - junctophilin 2, C5ar1 - complement component 5a receptor 1, Cxcr4 - chemokine (c-x-c motif) receptor 4, Hrc - histidine rich calcium binding protein, Asph - aspartate-beta-hydroxylase, Nos1 - nitric oxide synthase 1, neuronal, Ngfr - nerve growth factor receptor, Adcyap1r1 - adenylate cyclase activating polypeptide 1 receptor 1, Gpr4 - g protein-coupled recept…	BP	DOWN
GO:0006935	chemotaxis	1.95e-08	1.75e-06	1.83	9959	145	2546	68	[Sema5b - sema domain, seven thrombospondin repeats (type 1 and type 1-like), transmembrane domain (tm) and short cytoplasmic domain, (semaphorin) 5b, Sema6d - sema domain, transmembrane domain (tm), and cytoplasmic domain, (semaphorin) 6d, C5ar1 - complement component 5a receptor 1, Cxcr4 - chemokine (c-x-c motif) receptor 4, Sema3g - sema domain, immunoglobulin domain (ig), short basic domain, …	BP	DOWN
GO:0050727	regulation of inflammatory response	2.39e-08	2.13e-06	1.73	9959	183	2546	81	[Ptgis - prostaglandin i2 (prostacyclin) synthase, Ctss - cathepsin s, Cfh - complement factor h, Tgm2 - transglutaminase 2, c polypeptide, Serping1 - serpin peptidase inhibitor, clade g (c1 inhibitor), member 1, Fcgr2b - fc fragment of igg, low affinity iib, receptor (cd32), Cx3cl1 - chemokine (c-x3-c motif) ligand 1, Pik3cg - phosphatidylinositol-4,5-bisphosphate 3-kinase, catalytic subunit gam…	BP	DOWN
GO:0042330	taxis	2.75e-08	2.44e-06	1.82	9959	146	2546	68	[Sema5b - sema domain, seven thrombospondin repeats (type 1 and type 1-like), transmembrane domain (tm) and short cytoplasmic domain, (semaphorin) 5b, Sema6d - sema domain, transmembrane domain (tm), and cytoplasmic domain, (semaphorin) 6d, C5ar1 - complement component 5a receptor 1, Cxcr4 - chemokine (c-x-c motif) receptor 4, Sema3g - sema domain, immunoglobulin domain (ig), short basic domain, …	BP	DOWN
GO:0007613	memory	2.96e-08	2.6e-06	2.12	9959	81	2546	44	[Igf2 - insulin-like growth factor 2, Jph3 - junctophilin 3, Fgf13 - fibroblast growth factor 13, Igf1 - insulin-like growth factor 1, Ep300 - e1a binding protein p300, Mapt - microtubule-associated protein tau, Prkcz - protein kinase c, zeta, S100b - s100 calcium binding protein b, Ntf3 - neurotrophin 3, Cebpb - ccaat/enhancer binding protein (c/ebp), beta, Il1rn - interleukin 1 receptor antagon…	BP	DOWN
GO:0051384	response to glucocorticoid	2.99e-08	2.62e-06	1.74	9959	175	2546	78	[Agtr1b - angiotensin ii receptor, type 1b, Aqp1 - aquaporin 1, Trim63 - tripartite motif containing 63, e3 ubiquitin protein ligase, Ptgds - prostaglandin d2 synthase (brain), Acadm - acyl-coa dehydrogenase, c-4 to c-12 straight chain, Nos3 - nitric oxide synthase 3, endothelial cell, Ghr - growth hormone receptor, Ep300 - e1a binding protein p300, Ddit4 - dna-damage-inducible transcript 4, Gpr8…	BP	DOWN
GO:0032414	positive regulation of ion transmembrane transporter activity	3.19e-08	2.77e-06	2.25	9959	66	2546	38	[Jph2 - junctophilin 2, Stac - sh3 and cysteine rich domain, Dmd - dystrophin, Asph - aspartate-beta-hydroxylase, Ctss - cathepsin s, Lrrc38 - leucine rich repeat containing 38, Rnf207 - ring finger protein 207, Akap7 - a kinase (prka) anchor protein 7, Nlgn3 - neuroligin 3, Casq1 - calsequestrin 1 (fast-twitch, skeletal muscle), S100a1 - s100 calcium binding protein a1, Ank3 - ankyrin 3, node of…	BP	DOWN
GO:1903530	regulation of secretion by cell	3.23e-08	2.79e-06	1.45	9959	446	2546	165	[Adcy5 - adenylate cyclase 5, Exph5 - exophilin 5, Arid5a - at rich interactive domain 5a (mrf1 like), Nos1 - nitric oxide synthase 1, neuronal, Chd7 - chromodomain helicase dna binding protein 7, Blk - b lymphoid tyrosine kinase, Socs1 - suppressor of cytokine signaling 1, Nr3c2 - nuclear receptor subfamily 3, group c, member 2, Il1rn - interleukin 1 receptor antagonist, Nr1d1 - nuclear receptor…	BP	DOWN
GO:0009967	positive regulation of signal transduction	3.26e-08	2.8e-06	1.29	9959	946	2546	313	[Jph2 - junctophilin 2, Scube3 - signal peptide, cub domain, egf-like 3, Peli2 - pellino e3 ubiquitin protein ligase family member 2, Ptprj - protein tyrosine phosphatase, receptor type, j, Ppp2r1b - protein phosphatase 2, regulatory subunit a, beta, Gdf10 - growth differentiation factor 10, Adcyap1r1 - adenylate cyclase activating polypeptide 1 receptor 1, Ror1 - receptor tyrosine kinase-like or…	BP	DOWN
GO:0035637	multicellular organismal signaling	3.42e-08	2.91e-06	2.68	9959	38	2546	26	[Kcnh2 - potassium voltage-gated channel, subfamily h (eag-related), member 2, Scn3b - sodium channel, voltage-gated, type iii, beta, Cacna1g - calcium channel, voltage-dependent, t type, alpha 1g subunit, S1pr1 - sphingosine-1-phosphate receptor 1, Trpm4 - transient receptor potential cation channel, subfamily m, member 4, Gja1 - gap junction protein, alpha 1, Pln - phospholamban, Scn1b - sodium…	BP	DOWN
GO:0030003	cellular cation homeostasis	3.49e-08	2.96e-06	1.52	9959	331	2546	129	[Jph2 - junctophilin 2, Adcy5 - adenylate cyclase 5, C5ar1 - complement component 5a receptor 1, Hrc - histidine rich calcium binding protein, Cxcr4 - chemokine (c-x-c motif) receptor 4, Nos1 - nitric oxide synthase 1, neuronal, Asph - aspartate-beta-hydroxylase, Adcyap1r1 - adenylate cyclase activating polypeptide 1 receptor 1, Nr3c2 - nuclear receptor subfamily 3, group c, member 2, Gpr4 - g pr…	BP	DOWN
GO:0048545	response to steroid hormone	4.31e-08	3.64e-06	1.61	9959	245	2546	101	[Trim63 - tripartite motif containing 63, e3 ubiquitin protein ligase, Acadm - acyl-coa dehydrogenase, c-4 to c-12 straight chain, Nos3 - nitric oxide synthase 3, endothelial cell, Ddit4 - dna-damage-inducible transcript 4, Gpr83 - g protein-coupled receptor 83, Socs1 - suppressor of cytokine signaling 1, Tbl1x - transducin (beta)-like 1 x-linked, Ptpru - protein tyrosine phosphatase, receptor ty…	BP	DOWN
GO:0010817	regulation of hormone levels	4.69e-08	3.93e-06	1.58	9959	273	2546	110	[Adcy5 - adenylate cyclase 5, Nos1 - nitric oxide synthase 1, neuronal, Chd7 - chromodomain helicase dna binding protein 7, Blk - b lymphoid tyrosine kinase, Il1rn - interleukin 1 receptor antagonist, Hsd17b8 - hydroxysteroid (17-beta) dehydrogenase 8, Ddo - d-aspartate oxidase, Nr1d1 - nuclear receptor subfamily 1, group d, member 1, Rbp1 - retinol binding protein 1, cellular, Oxct1 - 3-oxoacid …	BP	DOWN
GO:1903115	regulation of actin filament-based movement	5.06e-08	4.21e-06	2.81	9959	32	2546	23	[Mylk2 - myosin light chain kinase 2, Cacna1h - calcium channel, voltage-dependent, t type, alpha 1h subunit, Ank2 - ankyrin 2, neuronal, Nos1 - nitric oxide synthase 1, neuronal, Fxyd1 - fxyd domain-containing ion transport regulator 1, Ryr2 - ryanodine receptor 2, cardiac, Tnnc1 - troponin c type 1 (slow), Rnf207 - ring finger protein 207, Ctnna3 - catenin (cadherin associated protein), alpha 3…	BP	DOWN
GO:0030595	leukocyte chemotaxis	5.43e-08	4.49e-06	2.27	9959	62	2546	36	[Nckap1l - nck associated protein 1 like, C5ar1 - complement component 5a receptor 1, Cxcl1 - chemokine (c-x-c motif) ligand 1, Il1rn - interleukin 1 receptor antagonist, Coro1a - coronin, actin binding protein 1a, S1pr1 - sphingosine-1-phosphate receptor 1, Ccl6 - chemokine (c-c motif) ligand 6, Cx3cl1 - chemokine (c-x3-c motif) ligand 1, Ptpro - protein tyrosine phosphatase, receptor type, o, T…	BP	DOWN
GO:0031960	response to corticosteroid	5.81e-08	4.78e-06	1.7	9959	189	2546	82	[Agtr1b - angiotensin ii receptor, type 1b, Aqp1 - aquaporin 1, Trim63 - tripartite motif containing 63, e3 ubiquitin protein ligase, Ptgds - prostaglandin d2 synthase (brain), Acadm - acyl-coa dehydrogenase, c-4 to c-12 straight chain, Nos3 - nitric oxide synthase 3, endothelial cell, Ghr - growth hormone receptor, Ep300 - e1a binding protein p300, Ddit4 - dna-damage-inducible transcript 4, Gpr8…	BP	DOWN
GO:0006816	calcium ion transport	6.17e-08	5.04e-06	1.88	9959	123	2546	59	[Jph2 - junctophilin 2, Jph3 - junctophilin 3, Ramp1 - receptor (g protein-coupled) activity modifying protein 1, Nfatc1 - nuclear factor of activated t-cells, cytoplasmic, calcineurin-dependent 1, Cacna1h - calcium channel, voltage-dependent, t type, alpha 1h subunit, Asph - aspartate-beta-hydroxylase, Coro1a - coronin, actin binding protein 1a, Trpc4 - transient receptor potential cation channe…	BP	DOWN
GO:0006873	cellular ion homeostasis	6.25e-08	5.09e-06	1.51	9959	337	2546	130	[Jph2 - junctophilin 2, Adcy5 - adenylate cyclase 5, C5ar1 - complement component 5a receptor 1, Hrc - histidine rich calcium binding protein, Cxcr4 - chemokine (c-x-c motif) receptor 4, Nos1 - nitric oxide synthase 1, neuronal, Asph - aspartate-beta-hydroxylase, Adcyap1r1 - adenylate cyclase activating polypeptide 1 receptor 1, Nr3c2 - nuclear receptor subfamily 3, group c, member 2, Gpr4 - g pr…	BP	DOWN
GO:0048519	negative regulation of biological process	6.36e-08	5.15e-06	1.13	9959	3205	2546	928	[Dusp4 - dual specificity phosphatase 4, Plekhh2 - pleckstrin homology domain containing, family h (with myth4 domain) member 2, Kcnq4 - potassium voltage-gated channel, kqt-like subfamily, member 4, Hopx - hop homeobox, Adcyap1r1 - adenylate cyclase activating polypeptide 1 receptor 1, Il1rn - interleukin 1 receptor antagonist, Nlgn3 - neuroligin 3, Specc1l - sperm antigen with calponin homology…	BP	DOWN
1, Socs3 - suppressor of cytokine signaling 3, Plcb2 - phospholipase c, beta 2, Lama4 - laminin, alpha 4, Cbx4 - chromobox homolog 4, Ddx3x - dead (asp-glu-ala-asp) box helicase 3, x-linked, Socs2 - suppressor of cytokine signaling 2, Ppt1 - palmitoyl-protein thioesterase 1, Pnkd - paroxysmal nonkinesigenic dyskinesia, Bcor - bcl6 co-repressor, Ppp1r9a - protein phosphatase 1, regulatory subunit …										BP	DOWN
GO:0006941	striated muscle contraction	6.49e-08	5.22e-06	2.35	9959	55	2546	33	[Mb - myoglobin, Kcnh2 - potassium voltage-gated channel, subfamily h (eag-related), member 2, Dmd - dystrophin, Scn3b - sodium channel, voltage-gated, type iii, beta, Cxcr4 - chemokine (c-x-c motif) receptor 4, Nos1 - nitric oxide synthase 1, neuronal, Tnnc1 - troponin c type 1 (slow), Ppp1r13l - protein phosphatase 1, regulatory subunit 13 like, Sgcd - sarcoglycan, delta (dystrophin-associated …	BP	DOWN
GO:0006959	humoral immune response	6.99e-08	5.59e-06	2.44	9959	48	2546	30	[C4b - complement component 4b (chido blood group), Cxcl1 - chemokine (c-x-c motif) ligand 1, C1s - complement component 1, s subcomponent, C7 - complement component 7, Tnfrsf21 - tumor necrosis factor receptor superfamily, member 21, Cfh - complement factor h, Fcn1 - ficolin (collagen/fibrinogen domain containing) 1, C1qc - complement component 1, q subcomponent, c chain, C1r - complement compon…	BP	DOWN
GO:0060326	cell chemotaxis	7e-08	5.56e-06	2	9959	96	2546	49	[C5ar1 - complement component 5a receptor 1, Cxcr4 - chemokine (c-x-c motif) receptor 4, Ccrl2 - chemokine (c-c motif) receptor-like 2, Il1rn - interleukin 1 receptor antagonist, Coro1a - coronin, actin binding protein 1a, Cxcl14 - chemokine (c-x-c motif) ligand 14, Sema5a - sema domain, seven thrombospondin repeats (type 1 and type 1-like), transmembrane domain (tm) and short cytoplasmic domain,…	BP	DOWN
GO:0007187	G protein-coupled receptor signaling pathway, coupled to cyclic nucleotide second messenger	7.21e-08	5.7e-06	2.18	9959	70	2546	39	[Adcy5 - adenylate cyclase 5, Ramp1 - receptor (g protein-coupled) activity modifying protein 1, Adcy9 - adenylate cyclase 9, Gnaz - guanine nucleotide binding protein (g protein), alpha z polypeptide, Gnao1 - guanine nucleotide binding protein (g protein), alpha activating activity polypeptide o, Gnas - gnas complex locus, Gnal - guanine nucleotide binding protein, alpha stimulating, olfactory t…	BP	DOWN
GO:0007188	adenylate cyclase-modulating G protein-coupled receptor signaling pathway	7.29e-08	5.73e-06	2.23	9959	65	2546	37	[Adcy5 - adenylate cyclase 5, Ramp1 - receptor (g protein-coupled) activity modifying protein 1, Adcy9 - adenylate cyclase 9, Gnaz - guanine nucleotide binding protein (g protein), alpha z polypeptide, Gnao1 - guanine nucleotide binding protein (g protein), alpha activating activity polypeptide o, Gnas - gnas complex locus, Gnal - guanine nucleotide binding protein, alpha stimulating, olfactory t…	BP	DOWN
GO:0050900	leukocyte migration	8.08e-08	6.32e-06	2.02	9959	91	2546	47	[Nckap1l - nck associated protein 1 like, Cxcl1 - chemokine (c-x-c motif) ligand 1, C5ar1 - complement component 5a receptor 1, Cd34 - cd34 molecule, Il1rn - interleukin 1 receptor antagonist, Coro1a - coronin, actin binding protein 1a, S1pr1 - sphingosine-1-phosphate receptor 1, Ccl6 - chemokine (c-c motif) ligand 6, Cx3cl1 - chemokine (c-x3-c motif) ligand 1, Dapk2 - death-associated protein ki…	BP	DOWN
GO:0009725	response to hormone	8.29e-08	6.44e-06	1.34	9959	692	2546	237	[Acadm - acyl-coa dehydrogenase, c-4 to c-12 straight chain, Socs1 - suppressor of cytokine signaling 1, Adcyap1r1 - adenylate cyclase activating polypeptide 1 receptor 1, Ptpru - protein tyrosine phosphatase, receptor type, u, Il1rn - interleukin 1 receptor antagonist, Nr1d1 - nuclear receptor subfamily 1, group d, member 1, Oxct1 - 3-oxoacid coa transferase 1, Fcgr2b - fc fragment of igg, low a…	BP	DOWN
GO:0055117	regulation of cardiac muscle contraction	8.78e-08	6.79e-06	2.47	9959	46	2546	29	[Agrn - agrin, Dmd - dystrophin, Cacna1h - calcium channel, voltage-dependent, t type, alpha 1h subunit, Fxyd1 - fxyd domain-containing ion transport regulator 1, Rnf207 - ring finger protein 207, Trpm4 - transient receptor potential cation channel, subfamily m, member 4, Akap6 - a kinase (prka) anchor protein 6, Pln - phospholamban, Ank2 - ankyrin 2, neuronal, Ryr2 - ryanodine receptor 2, cardia…	BP	DOWN
GO:0032103	positive regulation of response to external stimulus	9.61e-08	7.39e-06	1.71	9959	176	2546	77	[Ptk2b - protein tyrosine kinase 2 beta, C5ar1 - complement component 5a receptor 1, Ctss - cathepsin s, Ptprj - protein tyrosine phosphatase, receptor type, j, Ly86 - lymphocyte antigen 86, Il23a - interleukin 23, alpha subunit p19, Cxcl14 - chemokine (c-x-c motif) ligand 14, Sema5a - sema domain, seven thrombospondin repeats (type 1 and type 1-like), transmembrane domain (tm) and short cytoplas…	BP	DOWN
GO:0001775	cell activation	1.04e-07	7.95e-06	1.54	9959	289	2546	114	[Vwf - von willebrand factor, Apold1 - apolipoprotein l domain containing 1, Cxcr4 - chemokine (c-x-c motif) receptor 4, Chd7 - chromodomain helicase dna binding protein 7, Ptprj - protein tyrosine phosphatase, receptor type, j, Coro1a - coronin, actin binding protein 1a, Il23a - interleukin 23, alpha subunit p19, Atp11c - atpase, class vi, type 11c, Bcl6 - b-cell cll/lymphoma 6, Itgb3 - integrin…	BP	DOWN
GO:0007267	cell-cell signaling	1.1e-07	8.37e-06	1.76	9959	156	2546	70	[Synj2bp - synaptojanin 2 binding protein, Nos1 - nitric oxide synthase 1, neuronal, Sv2c - synaptic vesicle glycoprotein 2c, Efnb3 - ephrin b3, Cx3cl1 - chemokine (c-x3-c motif) ligand 1, Ntrk2 - neurotrophic tyrosine kinase, receptor, type 2, Dlg3 - discs, large homolog 3 (drosophila), Grik5 - glutamate receptor, ionotropic, kainate 5, P2rx1 - purinergic receptor p2x, ligand-gated ion channel, …	BP	DOWN
GO:0051272	positive regulation of cellular component movement	1.34e-07	1.01e-05	1.45	9959	402	2546	149	[Gli1 - gli family zinc finger 1, Sema5b - sema domain, seven thrombospondin repeats (type 1 and type 1-like), transmembrane domain (tm) and short cytoplasmic domain, (semaphorin) 5b, Epb4.1l5 - erythrocyte membrane protein band 4.1 like 5, Nos3 - nitric oxide synthase 3, endothelial cell, C5ar1 - complement component 5a receptor 1, Cxcr4 - chemokine (c-x-c motif) receptor 4, Diaph1 - diaphanous-…	BP	DOWN
GO:0007156	homophilic cell adhesion via plasma membrane adhesion molecules	1.36e-07	1.03e-05	2.39	9959	49	2546	30	[Dchs1 - dachsous 1 (drosophila), Cadm3 - cell adhesion molecule 3, Pcdhb8 - protocadherin beta 8, Nexn - nexilin (f actin binding protein), Pcdhb12 - protocadherin beta 12, Amigo1 - adhesion molecule with ig like domain 1, Pcdhb4 - protocadherin beta 4, Esam - endothelial cell adhesion molecule, Pcdh17 - protocadherin 17, Cdh24 - cadherin 24, type 2, Pcdhb10 - protocadherin beta 10, Pcdhb11 - pr…	BP	DOWN
GO:1903169	regulation of calcium ion transmembrane transport	1.42e-07	1.07e-05	1.98	9959	95	2546	48	[Ptk2b - protein tyrosine kinase 2 beta, Jph3 - junctophilin 3, Jph2 - junctophilin 2, Aplnr - apelin receptor, Dmd - dystrophin, Stac - sh3 and cysteine rich domain, Rrad - ras-related associated with diabetes, Diaph1 - diaphanous-related formin 1, Hrc - histidine rich calcium binding protein, Asph - aspartate-beta-hydroxylase, Chd7 - chromodomain helicase dna binding protein 7, Coro1a - coronin…	BP	DOWN
GO:0009628	response to abiotic stimulus	1.51e-07	1.13e-05	1.29	9959	879	2546	290	[Vwf - von willebrand factor, Sema5b - sema domain, seven thrombospondin repeats (type 1 and type 1-like), transmembrane domain (tm) and short cytoplasmic domain, (semaphorin) 5b, Acadm - acyl-coa dehydrogenase, c-4 to c-12 straight chain, Plcb4 - phospholipase c, beta 4, Cxcr4 - chemokine (c-x-c motif) receptor 4, Nlgn3 - neuroligin 3, Nr1d1 - nuclear receptor subfamily 1, group d, member 1, Ntr…	BP	DOWN
GO:0061337	cardiac conduction	1.72e-07	1.28e-05	2.9	9959	27	2546	20	[Kcnh2 - potassium voltage-gated channel, subfamily h (eag-related), member 2, Scn3b - sodium channel, voltage-gated, type iii, beta, Scn1b - sodium channel, voltage-gated, type i, beta, Ank2 - ankyrin 2, neuronal, Cacna1g - calcium channel, voltage-dependent, t type, alpha 1g subunit, Kcnq1 - potassium voltage-gated channel, kqt-like subfamily, member 1, Ctnna3 - catenin (cadherin associated pro…	BP	DOWN
GO:0045926	negative regulation of growth	1.74e-07	1.29e-05	1.67	9959	190	2546	81	[Cdk5r1 - cyclin-dependent kinase 5, regulatory subunit 1 (p35), Fgf13 - fibroblast growth factor 13, Rgs4 - regulator of g-protein signaling 4, Sema5b - sema domain, seven thrombospondin repeats (type 1 and type 1-like), transmembrane domain (tm) and short cytoplasmic domain, (semaphorin) 5b, Sema6d - sema domain, transmembrane domain (tm), and cytoplasmic domain, (semaphorin) 6d, Pi16 - peptida…	BP	DOWN
GO:0086091	regulation of heart rate by cardiac conduction	1.77e-07	1.3e-05	3.06	9959	23	2546	18	[Kcnh2 - potassium voltage-gated channel, subfamily h (eag-related), member 2, Scn3b - sodium channel, voltage-gated, type iii, beta, Scn1b - sodium channel, voltage-gated, type i, beta, Ank2 - ankyrin 2, neuronal, Cacna1g - calcium channel, voltage-dependent, t type, alpha 1g subunit, Ctnna3 - catenin (cadherin associated protein), alpha 3, Kcnq1 - potassium voltage-gated channel, kqt-like subfa…	BP	DOWN
GO:1901381	positive regulation of potassium ion transmembrane transport	1.79e-07	1.31e-05	2.97	9959	25	2546	19	[Kcnh2 - potassium voltage-gated channel, subfamily h (eag-related), member 2, Ank2 - ankyrin 2, neuronal, Kcnip2 - kv channel-interacting protein 2, Abcc8 - atp-binding cassette, subfamily c (cftr/mrp), member 8, Atp1b2 - atpase, na+/k+ transporting, beta 2 polypeptide, Lrrc38 - leucine rich repeat containing 38, Rnf207 - ring finger protein 207, Kcnq1 - potassium voltage-gated channel, kqt-like…	BP	DOWN
GO:1901701	cellular response to oxygen-containing compound	2.04e-07	1.48e-05	1.32	9959	709	2546	240	[Vwf - von willebrand factor, Socs1 - suppressor of cytokine signaling 1, Il1rn - interleukin 1 receptor antagonist, Nr1d1 - nuclear receptor subfamily 1, group d, member 1, Fcgr2b - fc fragment of igg, low affinity iib, receptor (cd32), Ntrk2 - neurotrophic tyrosine kinase, receptor, type 2, Agtr2 - angiotensin ii receptor, type 2, Trpm4 - transient receptor potential cation channel, subfamily m…	BP	DOWN
GO:0071621	granulocyte chemotaxis	2.05e-07	1.48e-05	2.57	9959	38	2546	25	[Nckap1l - nck associated protein 1 like, Cxcl1 - chemokine (c-x-c motif) ligand 1, C5ar1 - complement component 5a receptor 1, Il1rn - interleukin 1 receptor antagonist, Ccl6 - chemokine (c-c motif) ligand 6, Cx3cl1 - chemokine (c-x3-c motif) ligand 1, Il1b - interleukin 1 beta, Pf4 - platelet factor 4, Ccl12 - chemokine (c-c motif) ligand 12, Vav1 - vav 1 guanine nucleotide exchange factor, Cxc…	BP	DOWN
GO:0086010	membrane depolarization during action potential	2.08e-07	1.49e-05	3.63	9959	14	2546	13	[Kcnh2 - potassium voltage-gated channel, subfamily h (eag-related), member 2, Scn3b - sodium channel, voltage-gated, type iii, beta, Scn1b - sodium channel, voltage-gated, type i, beta, Cacna1h - calcium channel, voltage-dependent, t type, alpha 1h subunit, Cacna1g - calcium channel, voltage-dependent, t type, alpha 1g subunit, Scn7a - sodium channel, voltage-gated, type vii, alpha, Scn3a - sodi…	BP	DOWN
GO:0051704	multi-organism process	2.1e-07	1.5e-05	1.37	9959	550	2546	193	[Il1rn - interleukin 1 receptor antagonist, Nlgn3 - neuroligin 3, Fcgr2b - fc fragment of igg, low affinity iib, receptor (cd32), Ctdp1 - ctd (carboxy-terminal domain, rna polymerase ii, polypeptide a) phosphatase, subunit 1, Bnip3 - bcl2/adenovirus e1b interacting protein 3, Stab1 - stabilin 1, Tnfaip8 - tumor necrosis factor, alpha-induced protein 8, Bcl3 - b-cell cll/lymphoma 3, Cxcl13 - chemo…	BP	DOWN
GO:0051606	detection of stimulus	2.42e-07	1.72e-05	2.09	9959	75	2546	40	[Plcb2 - phospholipase c, beta 2, Igf1 - insulin-like growth factor 1, Sema5b - sema domain, seven thrombospondin repeats (type 1 and type 1-like), transmembrane domain (tm) and short cytoplasmic domain, (semaphorin) 5b, Naip6 - nlr family, apoptosis inhibitory protein 6, Plcb4 - phospholipase c, beta 4, C4b - complement component 4b (chido blood group), Cxcr4 - chemokine (c-x-c motif) receptor 4…	BP	DOWN
GO:1902531	regulation of intracellular signal transduction	2.55e-07	1.8e-05	1.25	9959	1080	2546	346	[Dusp4 - dual specificity phosphatase 4, Jph2 - junctophilin 2, Rasip1 - ras interacting protein 1, Hrc - histidine rich calcium binding protein, Peli2 - pellino e3 ubiquitin protein ligase family member 2, Socs1 - suppressor of cytokine signaling 1, Ptprj - protein tyrosine phosphatase, receptor type, j, Adcyap1r1 - adenylate cyclase activating polypeptide 1 receptor 1, Cyth4 - cytohesin 4, Gdf1…	BP	DOWN
GO:0032411	positive regulation of transporter activity	2.64e-07	1.86e-05	2.12	9959	70	2546	38	[Jph2 - junctophilin 2, Stac - sh3 and cysteine rich domain, Dmd - dystrophin, Asph - aspartate-beta-hydroxylase, Ctss - cathepsin s, Lrrc38 - leucine rich repeat containing 38, Rnf207 - ring finger protein 207, Akap7 - a kinase (prka) anchor protein 7, Nlgn3 - neuroligin 3, Casq1 - calsequestrin 1 (fast-twitch, skeletal muscle), S100a1 - s100 calcium binding protein a1, Ank3 - ankyrin 3, node of…	BP	DOWN
GO:0097530	granulocyte migration	2.77e-07	1.94e-05	2.46	9959	43	2546	27	[Nckap1l - nck associated protein 1 like, C5ar1 - complement component 5a receptor 1, Cxcl1 - chemokine (c-x-c motif) ligand 1, Il1rn - interleukin 1 receptor antagonist, Ccl6 - chemokine (c-c motif) ligand 6, Cx3cl1 - chemokine (c-x3-c motif) ligand 1, Dapk2 - death-associated protein kinase 2, Il1b - interleukin 1 beta, Pf4 - platelet factor 4, Ccl12 - chemokine (c-c motif) ligand 12, Vav1 - va…	BP	DOWN
GO:0050920	regulation of chemotaxis	2.91e-07	2.03e-05	1.78	9959	136	2546	62	[Ptk2b - protein tyrosine kinase 2 beta, Sema5b - sema domain, seven thrombospondin repeats (type 1 and type 1-like), transmembrane domain (tm) and short cytoplasmic domain, (semaphorin) 5b, Sema6d - sema domain, transmembrane domain (tm), and cytoplasmic domain, (semaphorin) 6d, C5ar1 - complement component 5a receptor 1, Cxcr4 - chemokine (c-x-c motif) receptor 4, Sema3g - sema domain, immunogl…	BP	DOWN
GO:0035725	sodium ion transmembrane transport	2.96e-07	2.05e-05	2.65	9959	34	2546	23	[Slc41a1 - solute carrier family 41 (magnesium transporter), member 1, Scn3b - sodium channel, voltage-gated, type iii, beta, Pkd2 - polycystic kidney disease 2 (autosomal dominant), Scn1b - sodium channel, voltage-gated, type i, beta, Trpm5 - transient receptor potential cation channel, subfamily m, member 5, Slc9b2 - solute carrier family 9, subfamily b (nha2, cation proton antiporter 2), membe…	BP	DOWN
GO:0071407	cellular response to organic cyclic compound	3.05e-07	2.1e-05	1.46	9959	358	2546	134	[Adcy5 - adenylate cyclase 5, Gli2 - gli family zinc finger 2, Trim63 - tripartite motif containing 63, e3 ubiquitin protein ligase, Nos3 - nitric oxide synthase 3, endothelial cell, Diaph1 - diaphanous-related formin 1, Gramd1c - gram domain containing 1c, Nos1 - nitric oxide synthase 1, neuronal, Ddit4 - dna-damage-inducible transcript 4, Socs1 - suppressor of cytokine signaling 1, Il1rn - inte…	BP	DOWN
GO:0019935	cyclic-nucleotide-mediated signaling	3.69e-07	2.54e-05	2.17	9959	63	2546	35	[Aqp1 - aquaporin 1, Adcy5 - adenylate cyclase 5, Ramp1 - receptor (g protein-coupled) activity modifying protein 1, Pde9a - phosphodiesterase 9a, Adcy9 - adenylate cyclase 9, Npr1 - natriuretic peptide receptor a/guanylate cyclase a (atrionatriuretic peptide receptor a), Adcyap1r1 - adenylate cyclase activating polypeptide 1 receptor 1, Mrvi1 - murine retrovirus integration site 1 homolog, Gnas …	BP	DOWN
GO:0048167	regulation of synaptic plasticity	3.7e-07	2.53e-05	1.79	9959	131	2546	60	[Ptk2b - protein tyrosine kinase 2 beta, Jph3 - junctophilin 3, Ppfia3 - protein tyrosine phosphatase, receptor type, f polypeptide (ptprf), interacting protein (liprin), alpha 3, Mapt - microtubule-associated protein tau, Nos1 - nitric oxide synthase 1, neuronal, Prkcz - protein kinase c, zeta, Vamp2 - vesicle-associated membrane protein 2, Nlgn3 - neuroligin 3, Fcgr2b - fc fragment of igg, low …	BP	DOWN
GO:0008285	negative regulation of cell proliferation	3.91e-07	2.66e-05	1.41	9959	441	2546	159	[Magi2 - membrane associated guanylate kinase, ww and pdz domain containing 2, Synj2bp - synaptojanin 2 binding protein, Nos3 - nitric oxide synthase 3, endothelial cell, Nos1 - nitric oxide synthase 1, neuronal, Asph - aspartate-beta-hydroxylase, Ngfr - nerve growth factor receptor, Ptprj - protein tyrosine phosphatase, receptor type, j, Npr1 - natriuretic peptide receptor a/guanylate cyclase a …	BP	DOWN
GO:0007169	transmembrane receptor protein tyrosine kinase signaling pathway	5e-07	3.38e-05	1.56	9959	240	2546	96	[Cdk5r1 - cyclin-dependent kinase 5, regulatory subunit 1 (p35), Ptk2b - protein tyrosine kinase 2 beta, Ngef - neuronal guanine nucleotide exchange factor, Ghr - growth hormone receptor, Ddit4 - dna-damage-inducible transcript 4, Col4a1 - collagen, type iv, alpha 1, Blk - b lymphoid tyrosine kinase, Ptprj - protein tyrosine phosphatase, receptor type, j, Ror1 - receptor tyrosine kinase-like orph…	BP	DOWN
GO:0042592	homeostatic process	5.35e-07	3.6e-05	1.27	9959	897	2546	292	[Jph2 - junctophilin 2, Hrc - histidine rich calcium binding protein, Cxcr4 - chemokine (c-x-c motif) receptor 4, Adcyap1r1 - adenylate cyclase activating polypeptide 1 receptor 1, Nr3c2 - nuclear receptor subfamily 3, group c, member 2, Il1rn - interleukin 1 receptor antagonist, Trpc4 - transient receptor potential cation channel, subfamily c, member 4, Nr1d1 - nuclear receptor subfamily 1, grou…	BP	DOWN
GO:1901016	regulation of potassium ion transmembrane transporter activity	5.35e-07	3.58e-05	2.54	9959	37	2546	24	[Agrn - agrin, Klhl24 - kelch-like family member 24, Ank2 - ankyrin 2, neuronal, Abcc8 - atp-binding cassette, subfamily c (cftr/mrp), member 8, Fxyd1 - fxyd domain-containing ion transport regulator 1, Atp1b2 - atpase, na+/k+ transporting, beta 2 polypeptide, Wwp2 - ww domain containing e3 ubiquitin protein ligase 2, Kcnab1 - potassium voltage-gated channel, shaker-related subfamily, beta member…	BP	DOWN
GO:0051271	negative regulation of cellular component movement	5.96e-07	3.98e-05	1.6	9959	213	2546	87	[Limch1 - lim and calponin homology domains 1, Magi2 - membrane associated guanylate kinase, ww and pdz domain containing 2, Synj2bp - synaptojanin 2 binding protein, Sema6d - sema domain, transmembrane domain (tm), and cytoplasmic domain, (semaphorin) 6d, Sema5b - sema domain, seven thrombospondin repeats (type 1 and type 1-like), transmembrane domain (tm) and short cytoplasmic domain, (semaphor…	BP	DOWN
GO:0048523	negative regulation of cellular process	6.25e-07	4.15e-05	1.13	9959	2936	2546	848	[Dusp4 - dual specificity phosphatase 4, Plekhh2 - pleckstrin homology domain containing, family h (with myth4 domain) member 2, Kcnq4 - potassium voltage-gated channel, kqt-like subfamily, member 4, Hopx - hop homeobox, Adcyap1r1 - adenylate cyclase activating polypeptide 1 receptor 1, Il1rn - interleukin 1 receptor antagonist, Nlgn3 - neuroligin 3, Specc1l - sperm antigen with calponin homology…	BP	DOWN
pr domain containing 16, Astl - astacin-like metalloendopeptidase (m12 family), Tle1 - transducin-like enhancer of split 1 (e(sp1) homolog, drosophila), Hes1 - hairy and enhancer of split 1 (drosophila), Sox13 - sry (sex determining region y)-box 13, Bmp5 - bone morphogenetic protein 5, C1qc - complement component 1, q subcomponent, c chain, Cgnl1 - cingulin-like 1, Tgfbr1 - transforming growth f…										BP	DOWN
GO:0006814	sodium ion transport	6.46e-07	4.27e-05	2.25	9959	54	2546	31	[Fgf13 - fibroblast growth factor 13, Slc22a5 - solute carrier family 22 (organic cation/carnitine transporter), member 5, Scn3b - sodium channel, voltage-gated, type iii, beta, Trpm5 - transient receptor potential cation channel, subfamily m, member 5, Fxyd1 - fxyd domain-containing ion transport regulator 1, Slc9b2 - solute carrier family 9, subfamily b (nha2, cation proton antiporter 2), membe…	BP	DOWN
GO:0051279	regulation of release of sequestered calcium ion into cytosol	6.46e-07	4.25e-05	2.25	9959	54	2546	31	[Ptk2b - protein tyrosine kinase 2 beta, Jph3 - junctophilin 3, Jph2 - junctophilin 2, Aplnr - apelin receptor, Dmd - dystrophin, Diaph1 - diaphanous-related formin 1, Hrc - histidine rich calcium binding protein, Asph - aspartate-beta-hydroxylase, Chd7 - chromodomain helicase dna binding protein 7, Coro1a - coronin, actin binding protein 1a, Casq1 - calsequestrin 1 (fast-twitch, skeletal muscle)…	BP	DOWN
GO:1903037	regulation of leukocyte cell-cell adhesion	6.55e-07	4.29e-05	1.68	9959	168	2546	72	[Hlx - h2.0-like homeobox, Prkcz - protein kinase c, zeta, Socs1 - suppressor of cytokine signaling 1, Pnp - purine nucleoside phosphorylase, Lag3 - lymphocyte-activation gene 3, Coro1a - coronin, actin binding protein 1a, Il23a - interleukin 23, alpha subunit p19, Efnb3 - ephrin b3, Fam65b - family with sequence similarity 65, member b, Cd83 - cd83 molecule, Vcam1 - vascular cell adhesion molecu…	BP	DOWN
GO:0050795	regulation of behavior	6.55e-07	4.27e-05	2.57	9959	35	2546	23	[Htr1b - 5-hydroxytryptamine (serotonin) receptor 1b, g protein-coupled, Lepr - leptin receptor, Ptgds - prostaglandin d2 synthase (brain), Zfhx3 - zinc finger homeobox 3, Arrdc3 - arrestin domain containing 3, Mdk - midkine, Nlgn1 - neuroligin 1, Penk - proenkephalin, Apoe - apolipoprotein e, Mef2c - myocyte enhancer factor 2c, Nr4a3 - nuclear receptor subfamily 4, group a, member 3, Ptger3 - pr…	BP	DOWN
GO:0043408	regulation of MAPK cascade	7.16e-07	4.64e-05	1.39	9959	468	2546	166	[Hsph1 - heat shock 105/110 protein 1, Dusp4 - dual specificity phosphatase 4, Synj2bp - synaptojanin 2 binding protein, C5ar1 - complement component 5a receptor 1, Ngfr - nerve growth factor receptor, Peli2 - pellino e3 ubiquitin protein ligase family member 2, Ptprj - protein tyrosine phosphatase, receptor type, j, Atf3 - activating transcription factor 3, Gdf10 - growth differentiation factor …	BP	DOWN
GO:0002062	chondrocyte differentiation	7.94e-07	5.13e-05	2.61	9959	33	2546	22	[Gli2 - gli family zinc finger 2, Bmp2 - bone morphogenetic protein 2, Gpld1 - glycosylphosphatidylinositol specific phospholipase d1, Arid5a - at rich interactive domain 5a (mrf1 like), Bmpr1a - bone morphogenetic protein receptor, type ia, Fgfr1 - fibroblast growth factor receptor 1, Nppc - natriuretic peptide c, Creb3l2 - camp responsive element binding protein 3-like 2, Col9a1 - collagen, typ…	BP	DOWN
GO:0030335	positive regulation of cell migration	8.1e-07	5.21e-05	1.43	9959	383	2546	140	[Gli1 - gli family zinc finger 1, Sema5b - sema domain, seven thrombospondin repeats (type 1 and type 1-like), transmembrane domain (tm) and short cytoplasmic domain, (semaphorin) 5b, Epb4.1l5 - erythrocyte membrane protein band 4.1 like 5, C5ar1 - complement component 5a receptor 1, Nos3 - nitric oxide synthase 3, endothelial cell, Cxcr4 - chemokine (c-x-c motif) receptor 4, Diaph1 - diaphanous-…	BP	DOWN
GO:0002252	immune effector process	9.39e-07	6.01e-05	1.58	9959	218	2546	88	[Ptk2b - protein tyrosine kinase 2 beta, Setd2 - set domain containing 2, C1s - complement component 1, s subcomponent, Ddit4 - dna-damage-inducible transcript 4, Dock11 - dedicator of cytokinesis 11, Bst2 - bone marrow stromal cell antigen 2, Rsad2 - radical s-adenosyl methionine domain containing 2, Coro1a - coronin, actin binding protein 1a, Vamp2 - vesicle-associated membrane protein 2, Il23a…	BP	DOWN
GO:0051591	response to cAMP	1.01e-06	6.41e-05	1.88	9959	100	2546	48	[Aqp1 - aquaporin 1, Ptk2b - protein tyrosine kinase 2 beta, Fosl2 - fos-like antigen 2, Nos3 - nitric oxide synthase 3, endothelial cell, Ep300 - e1a binding protein p300, Birc2 - baculoviral iap repeat-containing 2, C1s - complement component 1, s subcomponent, Dusp1 - dual specificity phosphatase 1, Pygm - phosphorylase, glycogen, muscle, Fosb - fbj osteosarcoma oncogene b, Ppargc1b - peroxiso…	BP	DOWN
GO:2000147	positive regulation of cell motility	1.03e-06	6.56e-05	1.42	9959	391	2546	142	[Gli1 - gli family zinc finger 1, Sema5b - sema domain, seven thrombospondin repeats (type 1 and type 1-like), transmembrane domain (tm) and short cytoplasmic domain, (semaphorin) 5b, Epb4.1l5 - erythrocyte membrane protein band 4.1 like 5, C5ar1 - complement component 5a receptor 1, Nos3 - nitric oxide synthase 3, endothelial cell, Cxcr4 - chemokine (c-x-c motif) receptor 4, Diaph1 - diaphanous-…	BP	DOWN
GO:0097529	myeloid leukocyte migration	1.12e-06	7.07e-05	2.2	9959	55	2546	31	[Nckap1l - nck associated protein 1 like, C5ar1 - complement component 5a receptor 1, Cxcl1 - chemokine (c-x-c motif) ligand 1, Il1rn - interleukin 1 receptor antagonist, Ccl6 - chemokine (c-c motif) ligand 6, Cx3cl1 - chemokine (c-x3-c motif) ligand 1, Ptpro - protein tyrosine phosphatase, receptor type, o, Dapk2 - death-associated protein kinase 2, Il1b - interleukin 1 beta, Pf4 - platelet fact…	BP	DOWN
GO:0002673	regulation of acute inflammatory response	1.3e-06	8.14e-05	2.75	9959	27	2546	19	[Kng1 - kininogen 1, Ptgs2 - prostaglandin-endoperoxide synthase 2, Pla2g4a - phospholipase a2, group iva (cytosolic, calcium-dependent), Cfh - complement factor h, Serping1 - serpin peptidase inhibitor, clade g (c1 inhibitor), member 1, Fcgr2b - fc fragment of igg, low affinity iib, receptor (cd32), Pik3cg - phosphatidylinositol-4,5-bisphosphate 3-kinase, catalytic subunit gamma, Fcgr1a - fc fra…	BP	DOWN
GO:0060284	regulation of cell development	1.32e-06	8.23e-05	1.31	9959	686	2546	229	[Fgf13 - fibroblast growth factor 13, Cdk5r1 - cyclin-dependent kinase 5, regulatory subunit 1 (p35), Sema5b - sema domain, seven thrombospondin repeats (type 1 and type 1-like), transmembrane domain (tm) and short cytoplasmic domain, (semaphorin) 5b, Pi16 - peptidase inhibitor 16, Cxcr4 - chemokine (c-x-c motif) receptor 4, Ctdsp1 - ctd (carboxy-terminal domain, rna polymerase ii, polypeptide a)…	BP	DOWN
GO:0097755	positive regulation of blood vessel diameter	1.32e-06	8.23e-05	2.37	9959	43	2546	26	[Gch1 - gtp cyclohydrolase 1, Nos1 - nitric oxide synthase 1, neuronal, Kng1 - kininogen 1, Alox12 - arachidonate 12-lipoxygenase, Kdr - kinase insert domain receptor, Sod2 - superoxide dismutase 2, mitochondrial, Cx3cl1 - chemokine (c-x3-c motif) ligand 1, Kcnmb1 - potassium large conductance calcium-activated channel, subfamily m, beta member 1, Agtr2 - angiotensin ii receptor, type 2, Gpx1 - g…	BP	DOWN
GO:0050729	positive regulation of inflammatory response	1.44e-06	8.94e-05	2.04	9959	71	2546	37	[Ctss - cathepsin s, Kng1 - kininogen 1, Cebpb - ccaat/enhancer binding protein (c/ebp), beta, Tgm2 - transglutaminase 2, c polypeptide, Cdk19 - cyclin-dependent kinase 19, Gprc5b - g protein-coupled receptor, family c, group 5, member b, Cx3cl1 - chemokine (c-x3-c motif) ligand 1, Pik3cg - phosphatidylinositol-4,5-bisphosphate 3-kinase, catalytic subunit gamma, Stap1 - signal transducing adaptor…	BP	DOWN
GO:0006956	complement activation	1.5e-06	9.23e-05	3.22	9959	17	2546	14	[C1qb - complement component 1, q subcomponent, b chain, C4b - complement component 4b (chido blood group), C1s - complement component 1, s subcomponent, C7 - complement component 7, Cfb - complement factor b, C1qa - complement component 1, q subcomponent, a chain, Cfh - complement factor h, Fcn1 - ficolin (collagen/fibrinogen domain containing) 1, C1qc - complement component 1, q subcomponent, c…	BP	DOWN
GO:0035556	intracellular signal transduction	1.52e-06	9.32e-05	1.27	9959	875	2546	283	[Fgf13 - fibroblast growth factor 13, Plcb4 - phospholipase c, beta 4, Cxcr4 - chemokine (c-x-c motif) receptor 4, Socs1 - suppressor of cytokine signaling 1, Ptprj - protein tyrosine phosphatase, receptor type, j, Adcyap1r1 - adenylate cyclase activating polypeptide 1 receptor 1, Dgkh - diacylglycerol kinase, eta, Sik2 - salt-inducible kinase 2, Csf1r - colony stimulating factor 1 receptor, Tns1…	BP	DOWN
GO:0086001	cardiac muscle cell action potential	1.59e-06	9.76e-05	2.89	9959	23	2546	17	[Kcnh2 - potassium voltage-gated channel, subfamily h (eag-related), member 2, Dmd - dystrophin, Scn3b - sodium channel, voltage-gated, type iii, beta, Scn1b - sodium channel, voltage-gated, type i, beta, Ank2 - ankyrin 2, neuronal, Ryr2 - ryanodine receptor 2, cardiac, Cacna1g - calcium channel, voltage-dependent, t type, alpha 1g subunit, Kcnq1 - potassium voltage-gated channel, kqt-like subfam…	BP	DOWN
GO:1901342	regulation of vasculature development	1.76e-06	0.000108	1.55	9959	227	2546	90	[Ptk2b - protein tyrosine kinase 2 beta, Aqp1 - aquaporin 1, Synj2bp - synaptojanin 2 binding protein, Nfatc1 - nuclear factor of activated t-cells, cytoplasmic, calcineurin-dependent 1, Ptgis - prostaglandin i2 (prostacyclin) synthase, Acvrl1 - activin a receptor type ii-like 1, C5ar1 - complement component 5a receptor 1, Nos3 - nitric oxide synthase 3, endothelial cell, Cxcr4 - chemokine (c-x-c…	BP	DOWN
GO:0051928	positive regulation of calcium ion transport	1.82e-06	0.00011	1.93	9959	85	2546	42	[Jph2 - junctophilin 2, Aplnr - apelin receptor, Stac - sh3 and cysteine rich domain, Cxcr4 - chemokine (c-x-c motif) receptor 4, Asph - aspartate-beta-hydroxylase, Adcyap1r1 - adenylate cyclase activating polypeptide 1 receptor 1, Casq1 - calsequestrin 1 (fast-twitch, skeletal muscle), Cx3cl1 - chemokine (c-x3-c motif) ligand 1, S100a1 - s100 calcium binding protein a1, Akap6 - a kinase (prka) a…	BP	DOWN
GO:0071495	cellular response to endogenous stimulus	1.87e-06	0.000113	1.31	9959	651	2546	218	[Diaph1 - diaphanous-related formin 1, Socs1 - suppressor of cytokine signaling 1, Il1rn - interleukin 1 receptor antagonist, Fcgr2b - fc fragment of igg, low affinity iib, receptor (cd32), Ntrk2 - neurotrophic tyrosine kinase, receptor, type 2, Trpm4 - transient receptor potential cation channel, subfamily m, member 4, Agtr2 - angiotensin ii receptor, type 2, Trpm2 - transient receptor potential…	BP	DOWN
GO:0001934	positive regulation of protein phosphorylation	1.87e-06	0.000113	1.32	9959	627	2546	211	[Cdk5r1 - cyclin-dependent kinase 5, regulatory subunit 1 (p35), Cxcr4 - chemokine (c-x-c motif) receptor 4, Peli2 - pellino e3 ubiquitin protein ligase family member 2, Ptprj - protein tyrosine phosphatase, receptor type, j, Gdf10 - growth differentiation factor 10, Il1rn - interleukin 1 receptor antagonist, Csf1r - colony stimulating factor 1 receptor, Fcgr2b - fc fragment of igg, low affinity …	BP	DOWN
GO:0045785	positive regulation of cell adhesion	1.99e-06	0.000119	1.51	9959	259	2546	100	[Epb4.1l5 - erythrocyte membrane protein band 4.1 like 5, Socs1 - suppressor of cytokine signaling 1, Abi3bp - abi family, member 3 (nesh) binding protein, Ptprj - protein tyrosine phosphatase, receptor type, j, Ptpru - protein tyrosine phosphatase, receptor type, u, Coro1a - coronin, actin binding protein 1a, Il23a - interleukin 23, alpha subunit p19, Tgm2 - transglutaminase 2, c polypeptide, Vc…	BP	DOWN
GO:0048638	regulation of developmental growth	1.99e-06	0.000119	1.51	9959	259	2546	100	[Cdk5r1 - cyclin-dependent kinase 5, regulatory subunit 1 (p35), Fgf13 - fibroblast growth factor 13, Gli1 - gli family zinc finger 1, Sema5b - sema domain, seven thrombospondin repeats (type 1 and type 1-like), transmembrane domain (tm) and short cytoplasmic domain, (semaphorin) 5b, Hopx - hop homeobox, Pi16 - peptidase inhibitor 16, Cxcr4 - chemokine (c-x-c motif) receptor 4, Chd7 - chromodomai…	BP	DOWN
GO:0009612	response to mechanical stimulus	2.28e-06	0.000135	1.6	9959	191	2546	78	[Ptk2b - protein tyrosine kinase 2 beta, Aqp1 - aquaporin 1, Gli2 - gli family zinc finger 2, Nos3 - nitric oxide synthase 3, endothelial cell, Cxcr4 - chemokine (c-x-c motif) receptor 4, Nos1 - nitric oxide synthase 1, neuronal, Fosb - fbj osteosarcoma oncogene b, Fam65b - family with sequence similarity 65, member b, Ntrk2 - neurotrophic tyrosine kinase, receptor, type 2, Rcan1 - regulator of c…	BP	DOWN
GO:0043410	positive regulation of MAPK cascade	2.46e-06	0.000145	1.45	9959	321	2546	119	[C5ar1 - complement component 5a receptor 1, Ngfr - nerve growth factor receptor, Peli2 - pellino e3 ubiquitin protein ligase family member 2, Ptprj - protein tyrosine phosphatase, receptor type, j, Il1rn - interleukin 1 receptor antagonist, Csf1r - colony stimulating factor 1 receptor, Fcgr2b - fc fragment of igg, low affinity iib, receptor (cd32), Ntrk2 - neurotrophic tyrosine kinase, receptor,…	BP	DOWN
GO:0048513	animal organ development	2.48e-06	0.000146	1.24	9959	1021	2546	323	[Cdk5r1 - cyclin-dependent kinase 5, regulatory subunit 1 (p35), Vwf - von willebrand factor, Hopx - hop homeobox, Acadm - acyl-coa dehydrogenase, c-4 to c-12 straight chain, Diaph1 - diaphanous-related formin 1, Cxcr4 - chemokine (c-x-c motif) receptor 4, Socs1 - suppressor of cytokine signaling 1, Ptprj - protein tyrosine phosphatase, receptor type, j, Ptpru - protein tyrosine phosphatase, rece…	BP	DOWN
GO:0019933	cAMP-mediated signaling	2.55e-06	0.00015	2.24	9959	49	2546	28	[Adcy5 - adenylate cyclase 5, Ramp1 - receptor (g protein-coupled) activity modifying protein 1, Adcy9 - adenylate cyclase 9, Adcyap1r1 - adenylate cyclase activating polypeptide 1 receptor 1, Gnas - gnas complex locus, Gnal - guanine nucleotide binding protein, alpha stimulating, olfactory type, Adra1d - adrenoceptor alpha 1d, Pde3a - phosphodiesterase 3a, cgmp inhibited, Glp1r - glucagon-like p…	BP	DOWN
GO:0019233	sensory perception of pain	2.76e-06	0.000161	2.43	9959	37	2546	23	[Aqp1 - aquaporin 1, Scn3b - sodium channel, voltage-gated, type iii, beta, Cacna1h - calcium channel, voltage-dependent, t type, alpha 1h subunit, Ngfr - nerve growth factor receptor, Cacna1e - calcium channel, voltage-dependent, r type, alpha 1e subunit, Ptgs2 - prostaglandin-endoperoxide synthase 2, Dlg2 - discs, large homolog 2 (drosophila), Alox5 - arachidonate 5-lipoxygenase, Scn3a - sodium…	BP	DOWN
GO:0048731	system development	2.93e-06	0.00017	1.44	9959	335	2546	123	[Rom1 - retinal outer segment membrane protein 1, Mobp - myelin-associated oligodendrocyte basic protein, Gli2 - gli family zinc finger 2, Impad1 - inositol monophosphatase domain containing 1, Amh - anti-mullerian hormone, Chd7 - chromodomain helicase dna binding protein 7, Ngfr - nerve growth factor receptor, Speg - speg complex locus, Hip1r - huntingtin interacting protein 1 related, Ntrk2 - n…	BP	DOWN
GO:1902533	positive regulation of intracellular signal transduction	2.94e-06	0.00017	1.31	9959	610	2546	205	[Jph2 - junctophilin 2, Peli2 - pellino e3 ubiquitin protein ligase family member 2, Ptprj - protein tyrosine phosphatase, receptor type, j, Adcyap1r1 - adenylate cyclase activating polypeptide 1 receptor 1, Ror1 - receptor tyrosine kinase-like orphan receptor 1, Il1rn - interleukin 1 receptor antagonist, Fcgr2b - fc fragment of igg, low affinity iib, receptor (cd32), Csf1r - colony stimulating f…	BP	DOWN
GO:0065009	regulation of molecular function	3e-06	0.000173	1.16	9959	1861	2546	554	[Fgf13 - fibroblast growth factor 13, Dusp4 - dual specificity phosphatase 4, Hopx - hop homeobox, Adcyap1r1 - adenylate cyclase activating polypeptide 1 receptor 1, Rnf207 - ring finger protein 207, Il1rn - interleukin 1 receptor antagonist, Nlgn3 - neuroligin 3, Agtr2 - angiotensin ii receptor, type 2, Ank3 - ankyrin 3, node of ranvier (ankyrin g), Col4a3 - collagen, type iv, alpha 3, Fgf16 - f…	BP	DOWN
GO:0060402	calcium ion transport into cytosol	3.18e-06	0.000182	2.33	9959	42	2546	25	[Jph2 - junctophilin 2, Jph3 - junctophilin 3, Plcb2 - phospholipase c, beta 2, Cacna1g - calcium channel, voltage-dependent, t type, alpha 1g subunit, Ptprc - protein tyrosine phosphatase, receptor type, c, Trpv1 - transient receptor potential cation channel, subfamily v, member 1, Ccr5 - chemokine (c-c motif) receptor 5, Glp1r - glucagon-like peptide 1 receptor, Trpm2 - transient receptor poten…	BP	DOWN
GO:1904427	positive regulation of calcium ion transmembrane transport	3.32e-06	0.00019	2.18	9959	52	2546	29	[Jph2 - junctophilin 2, Aplnr - apelin receptor, Stac - sh3 and cysteine rich domain, Asph - aspartate-beta-hydroxylase, Casq1 - calsequestrin 1 (fast-twitch, skeletal muscle), Cx3cl1 - chemokine (c-x3-c motif) ligand 1, S100a1 - s100 calcium binding protein a1, Akap6 - a kinase (prka) anchor protein 6, Gstm7 - glutathione s-transferase, mu 7, P2ry6 - pyrimidinergic receptor p2y, g-protein couple…	BP	DOWN
GO:0060048	cardiac muscle contraction	3.49e-06	0.000199	2.46	9959	35	2546	22	[Kcnh2 - potassium voltage-gated channel, subfamily h (eag-related), member 2, Tpm1 - tropomyosin 1, alpha, Dmd - dystrophin, Scn3b - sodium channel, voltage-gated, type iii, beta, Scn1b - sodium channel, voltage-gated, type i, beta, Cxcr4 - chemokine (c-x-c motif) receptor 4, Ank2 - ankyrin 2, neuronal, Ryr2 - ryanodine receptor 2, cardiac, Tnnc1 - troponin c type 1 (slow), Kcnq1 - potassium vol…	BP	DOWN
GO:0051960	regulation of nervous system development	3.59e-06	0.000203	1.3	9959	646	2546	215	[Fgf13 - fibroblast growth factor 13, Cdk5r1 - cyclin-dependent kinase 5, regulatory subunit 1 (p35), Cbln2 - cerebellin 2 precursor, Sema5b - sema domain, seven thrombospondin repeats (type 1 and type 1-like), transmembrane domain (tm) and short cytoplasmic domain, (semaphorin) 5b, Ntng2 - netrin g2, Cxcr4 - chemokine (c-x-c motif) receptor 4, Ctdsp1 - ctd (carboxy-terminal domain, rna polymeras…	BP	DOWN
GO:0086004	regulation of cardiac muscle cell contraction	3.61e-06	0.000204	2.71	9959	26	2546	18	[Cacna1h - calcium channel, voltage-dependent, t type, alpha 1h subunit, Ank2 - ankyrin 2, neuronal, Fxyd1 - fxyd domain-containing ion transport regulator 1, Ryr2 - ryanodine receptor 2, cardiac, Rnf207 - ring finger protein 207, Ctnna3 - catenin (cadherin associated protein), alpha 3, Atp1a2 - atpase, na+/k+ transporting, alpha 2 polypeptide, Stc1 - stanniocalcin 1, Trpm4 - transient receptor p…	BP	DOWN
GO:0060291	long-term synaptic potentiation	3.61e-06	0.000203	2.71	9959	26	2546	18	[Ptk2b - protein tyrosine kinase 2 beta, Braf - v-raf murine sarcoma viral oncogene homolog b, Prkcz - protein kinase c, zeta, Mpp2 - membrane protein, palmitoylated 2 (maguk p55 subfamily member 2), Rasgrf2 - ras protein-specific guanine nucleotide-releasing factor 2, S100b - s100 calcium binding protein b, Serpine2 - serpin peptidase inhibitor, clade e (nexin, plasminogen activator inhibitor ty…	BP	DOWN
GO:0031347	regulation of defense response	3.64e-06	0.000204	1.43	9959	333	2546	122	[Socs1 - suppressor of cytokine signaling 1, Lag3 - lymphocyte-activation gene 3, Il23a - interleukin 23, alpha subunit p19, Cfh - complement factor h, Tifa - traf-interacting protein with forkhead-associated domain, Tgm2 - transglutaminase 2, c polypeptide, Nr1d1 - nuclear receptor subfamily 1, group d, member 1, Fcgr2b - fc fragment of igg, low affinity iib, receptor (cd32), Syt11 - synaptotagm…	BP	DOWN
GO:0050863	regulation of T cell activation	4.02e-06	0.000225	1.61	9959	175	2546	72	[Hlx - h2.0-like homeobox, Prkcz - protein kinase c, zeta, Socs1 - suppressor of cytokine signaling 1, Pnp - purine nucleoside phosphorylase, Lag3 - lymphocyte-activation gene 3, Coro1a - coronin, actin binding protein 1a, Il23a - interleukin 23, alpha subunit p19, Efnb3 - ephrin b3, Fam65b - family with sequence similarity 65, member b, Cd83 - cd83 molecule, Vcam1 - vascular cell adhesion molecu…	BP	DOWN
GO:0007154	cell communication	4.03e-06	0.000224	1.41	9959	373	2546	134	[Synj2bp - synaptojanin 2 binding protein, Klf10 - kruppel-like factor 10, Nos1 - nitric oxide synthase 1, neuronal, Atf3 - activating transcription factor 3, Sv2c - synaptic vesicle glycoprotein 2c, Ntrk2 - neurotrophic tyrosine kinase, receptor, type 2, Trpm4 - transient receptor potential cation channel, subfamily m, member 4, Map3k5 - mitogen-activated protein kinase kinase kinase 5, Stab1 - …	BP	DOWN
GO:0022409	positive regulation of cell-cell adhesion	4.06e-06	0.000225	1.71	9959	133	2546	58	[Hlx - h2.0-like homeobox, Prkcz - protein kinase c, zeta, Socs1 - suppressor of cytokine signaling 1, Pnp - purine nucleoside phosphorylase, Ptpru - protein tyrosine phosphatase, receptor type, u, Coro1a - coronin, actin binding protein 1a, Il23a - interleukin 23, alpha subunit p19, Efnb3 - ephrin b3, Cx3cl1 - chemokine (c-x3-c motif) ligand 1, Cd83 - cd83 molecule, Vcam1 - vascular cell adhesio…	BP	DOWN
GO:0019228	neuronal action potential	4.07e-06	0.000225	3.35	9959	14	2546	12	[Kcnma1 - potassium large conductance calcium-activated channel, subfamily m, alpha member 1, Cacna1h - calcium channel, voltage-dependent, t type, alpha 1h subunit, Ank3 - ankyrin 3, node of ranvier (ankyrin g), P2rx1 - purinergic receptor p2x, ligand-gated ion channel, 1, Scn7a - sodium channel, voltage-gated, type vii, alpha, Cacna1g - calcium channel, voltage-dependent, t type, alpha 1g subun…	BP	DOWN
GO:0030308	negative regulation of cell growth	4.16e-06	0.000229	1.69	9959	139	2546	60	[Fgf13 - fibroblast growth factor 13, Cdk5r1 - cyclin-dependent kinase 5, regulatory subunit 1 (p35), Rgs4 - regulator of g-protein signaling 4, Sema5b - sema domain, seven thrombospondin repeats (type 1 and type 1-like), transmembrane domain (tm) and short cytoplasmic domain, (semaphorin) 5b, Sema6d - sema domain, transmembrane domain (tm), and cytoplasmic domain, (semaphorin) 6d, Pi16 - peptida…	BP	DOWN
GO:0030278	regulation of ossification	4.16e-06	0.000228	1.69	9959	139	2546	60	[Ptk2b - protein tyrosine kinase 2 beta, Gli1 - gli family zinc finger 1, Ltbp3 - latent transforming growth factor beta binding protein 3, Nfatc1 - nuclear factor of activated t-cells, cytoplasmic, calcineurin-dependent 1, Tob2 - transducer of erbb2, 2, Ranbp3l - ran binding protein 3-like, Gdf10 - growth differentiation factor 10, Rsad2 - radical s-adenosyl methionine domain containing 2, Trpm4…	BP	DOWN
GO:0009593	detection of chemical stimulus	4.16e-06	0.000227	2.77	9959	24	2546	17	[Plcb2 - phospholipase c, beta 2, Olr1387 - olfactory receptor 1387, Rtp4 - receptor (chemosensory) transporter protein 4, Tas2r143 - taste receptor, type 2, member 143, C4b - complement component 4b (chido blood group), Tas2r135 - taste receptor, type 2, member 135, Ryr2 - ryanodine receptor 2, cardiac, Sod2 - superoxide dismutase 2, mitochondrial, Kcnmb1 - potassium large conductance calcium-ac…	BP	DOWN
GO:0050865	regulation of cell activation	4.16e-06	0.000226	1.45	9959	311	2546	115	[Socs1 - suppressor of cytokine signaling 1, Ptprj - protein tyrosine phosphatase, receptor type, j, Il13ra1 - interleukin 13 receptor, alpha 1, Lag3 - lymphocyte-activation gene 3, Coro1a - coronin, actin binding protein 1a, Il23a - interleukin 23, alpha subunit p19, Nr1d1 - nuclear receptor subfamily 1, group d, member 1, Atp11c - atpase, class vi, type 11c, Fcgr2b - fc fragment of igg, low aff…	BP	DOWN
GO:1901019	regulation of calcium ion transmembrane transporter activity	4.18e-06	0.000226	2.13	9959	55	2546	30	[Jph2 - junctophilin 2, Jph3 - junctophilin 3, Dmd - dystrophin, Stac - sh3 and cysteine rich domain, Rrad - ras-related associated with diabetes, Hrc - histidine rich calcium binding protein, Asph - aspartate-beta-hydroxylase, Casq1 - calsequestrin 1 (fast-twitch, skeletal muscle), S100a1 - s100 calcium binding protein a1, Akap6 - a kinase (prka) anchor protein 6, Gstm7 - glutathione s-transfera…	BP	DOWN
GO:0070838	divalent metal ion transport	4.23e-06	0.000228	1.65	9959	154	2546	65	[Jph2 - junctophilin 2, Jph3 - junctophilin 3, Ramp1 - receptor (g protein-coupled) activity modifying protein 1, Nfatc1 - nuclear factor of activated t-cells, cytoplasmic, calcineurin-dependent 1, Cacna1h - calcium channel, voltage-dependent, t type, alpha 1h subunit, Asph - aspartate-beta-hydroxylase, Nipal2 - nipa-like domain containing 2, Coro1a - coronin, actin binding protein 1a, Trpc4 - tr…	BP	DOWN
GO:0043268	positive regulation of potassium ion transport	4.38e-06	0.000236	2.49	9959	33	2546	21	[Kcnh2 - potassium voltage-gated channel, subfamily h (eag-related), member 2, Cxcl1 - chemokine (c-x-c motif) ligand 1, Kcnip2 - kv channel-interacting protein 2, Ank2 - ankyrin 2, neuronal, Abcc8 - atp-binding cassette, subfamily c (cftr/mrp), member 8, Atp1b2 - atpase, na+/k+ transporting, beta 2 polypeptide, Lrrc38 - leucine rich repeat containing 38, Kcnq1 - potassium voltage-gated channel, …	BP	DOWN
GO:0060078	regulation of postsynaptic membrane potential	4.38e-06	0.000235	2.49	9959	33	2546	21	[Mpp2 - membrane protein, palmitoylated 2 (maguk p55 subfamily member 2), P2rx5 - purinergic receptor p2x, ligand-gated ion channel, 5, Nr3c2 - nuclear receptor subfamily 3, group c, member 2, Slc29a1 - solute carrier family 29 (equilibrative nucleoside transporter), member 1, Ppp1r9a - protein phosphatase 1, regulatory subunit 9a, Kcnc4 - potassium voltage gated channel, shaw-related subfamily, …	BP	DOWN
GO:0002791	regulation of peptide secretion	4.39e-06	0.000234	1.47	9959	279	2546	105	[Adcy5 - adenylate cyclase 5, Exph5 - exophilin 5, Arid5a - at rich interactive domain 5a (mrf1 like), Nos1 - nitric oxide synthase 1, neuronal, Chd7 - chromodomain helicase dna binding protein 7, Socs1 - suppressor of cytokine signaling 1, Blk - b lymphoid tyrosine kinase, Nr1d1 - nuclear receptor subfamily 1, group d, member 1, Oxct1 - 3-oxoacid coa transferase 1, Csf1r - colony stimulating fac…	BP	DOWN
GO:0002274	myeloid leukocyte activation	4.58e-06	0.000243	2.05	9959	63	2546	33	[Tyrobp - tyro protein tyrosine kinase binding protein, Irf4 - interferon regulatory factor 4, Vamp2 - vesicle-associated membrane protein 2, Cx3cl1 - chemokine (c-x3-c motif) ligand 1, Dock2 - dedicator of cytokinesis 2, Trpv1 - transient receptor potential cation channel, subfamily v, member 1, Tlr2 - toll-like receptor 2, Lcp2 - lymphocyte cytosolic protein 2, Ndrg1 - n-myc downstream regulate…	BP	DOWN
GO:0086012	membrane depolarization during cardiac muscle cell action potential	4.62e-06	0.000244	3.91	9959	9	2546	9	[Scn1b - sodium channel, voltage-gated, type i, beta, Scn3b - sodium channel, voltage-gated, type iii, beta, Trpm4 - transient receptor potential cation channel, subfamily m, member 4, Cacna2d1 - calcium channel, voltage-dependent, alpha2/delta subunit 1, Cacna1g - calcium channel, voltage-dependent, t type, alpha 1g subunit, Cacna1c - calcium channel, voltage-dependent, l type, alpha 1c subunit,…	BP	DOWN
GO:0072376	protein activation cascade	4.66e-06	0.000246	2.84	9959	22	2546	16	[C1qb - complement component 1, q subcomponent, b chain, C4b - complement component 4b (chido blood group), C1s - complement component 1, s subcomponent, C7 - complement component 7, Cfb - complement factor b, F13a1 - coagulation factor xiii, a1 polypeptide, C1qa - complement component 1, q subcomponent, a chain, Cfh - complement factor h, Fcn1 - ficolin (collagen/fibrinogen domain containing) 1,…	BP	DOWN
GO:0086002	cardiac muscle cell action potential involved in contraction	4.66e-06	0.000245	2.84	9959	22	2546	16	[Kcnh2 - potassium voltage-gated channel, subfamily h (eag-related), member 2, Scn1b - sodium channel, voltage-gated, type i, beta, Scn3b - sodium channel, voltage-gated, type iii, beta, Ank2 - ankyrin 2, neuronal, Ryr2 - ryanodine receptor 2, cardiac, Cacna1g - calcium channel, voltage-dependent, t type, alpha 1g subunit, Kcnq1 - potassium voltage-gated channel, kqt-like subfamily, member 1, Scn…	BP	DOWN
GO:0002675	positive regulation of acute inflammatory response	4.86e-06	0.000254	3.18	9959	16	2546	13	[Kng1 - kininogen 1, Ptgs2 - prostaglandin-endoperoxide synthase 2, Pla2g4a - phospholipase a2, group iva (cytosolic, calcium-dependent), Fcgr1a - fc fragment of igg, high affinity ia, receptor (cd64), Pik3cg - phosphatidylinositol-4,5-bisphosphate 3-kinase, catalytic subunit gamma, Ccr5 - chemokine (c-c motif) receptor 5, C3 - complement component 3, Ptger3 - prostaglandin e receptor 3 (subtype …	BP	DOWN
GO:0042493	response to drug	4.99e-06	0.00026	1.28	9959	739	2546	241	[Acadm - acyl-coa dehydrogenase, c-4 to c-12 straight chain, Ppp1r12a - protein phosphatase 1, regulatory subunit 12a, Cxcr4 - chemokine (c-x-c motif) receptor 4, Socs1 - suppressor of cytokine signaling 1, Adcyap1r1 - adenylate cyclase activating polypeptide 1 receptor 1, Il1rn - interleukin 1 receptor antagonist, Oxct1 - 3-oxoacid coa transferase 1, Trpm4 - transient receptor potential cation c…	BP	DOWN
GO:0050873	brown fat cell differentiation	5.03e-06	0.000261	2.93	9959	20	2546	15	[Mb - myoglobin, Lama4 - laminin, alpha 4, Ptgs2 - prostaglandin-endoperoxide synthase 2, LOC100910270 - uncharacterized loc100910270, Cebpb - ccaat/enhancer binding protein (c/ebp), beta, Ppargc1a - peroxisome proliferator-activated receptor gamma, coactivator 1 alpha, Slc2a4 - solute carrier family 2 (facilitated glucose transporter), member 4, Adrb1 - adrenoceptor beta 1, Arl4a - adp-ribosylat…	BP	DOWN
GO:0001659	temperature homeostasis	5.14e-06	0.000266	3.04	9959	18	2546	14	[Arrdc3 - arrestin domain containing 3, Il1rn - interleukin 1 receptor antagonist, Nr1d1 - nuclear receptor subfamily 1, group d, member 1, Egr1 - early growth response 1, Trpv1 - transient receptor potential cation channel, subfamily v, member 1, Adrb1 - adrenoceptor beta 1, Gpx1 - glutathione peroxidase 1, Trpm2 - transient receptor potential cation channel, subfamily m, member 2, Acadl - acyl-…	BP	DOWN
GO:0071396	cellular response to lipid	5.25e-06	0.000271	1.42	9959	345	2546	125	[Adcy5 - adenylate cyclase 5, Trim63 - tripartite motif containing 63, e3 ubiquitin protein ligase, Vwf - von willebrand factor, Arid5a - at rich interactive domain 5a (mrf1 like), Gramd1c - gram domain containing 1c, Ddit4 - dna-damage-inducible transcript 4, Il1rn - interleukin 1 receptor antagonist, Cfh - complement factor h, Nr1d1 - nuclear receptor subfamily 1, group d, member 1, Fcgr2b - fc…	BP	DOWN
GO:0043062	extracellular structure organization	5.43e-06	0.000279	1.63	9959	161	2546	67	[Col15a1 - collagen, type xv, alpha 1, Ctss - cathepsin s, Col4a1 - collagen, type iv, alpha 1, Olfml2a - olfactomedin-like 2a, Abi3bp - abi family, member 3 (nesh) binding protein, Adamts9 - adam metallopeptidase with thrombospondin type 1 motif, 9, Scara3 - scavenger receptor class a, member 3, Fbln1 - fibulin 1, Vit - vitrin, Col4a3 - collagen, type iv, alpha 3, Adamtsl2 - adamts-like 2, Bcl3 …	BP	DOWN
GO:0040013	negative regulation of locomotion	5.45e-06	0.000279	1.52	9959	226	2546	88	[Limch1 - lim and calponin homology domains 1, Magi2 - membrane associated guanylate kinase, ww and pdz domain containing 2, Synj2bp - synaptojanin 2 binding protein, Sema6d - sema domain, transmembrane domain (tm), and cytoplasmic domain, (semaphorin) 6d, Sema5b - sema domain, seven thrombospondin repeats (type 1 and type 1-like), transmembrane domain (tm) and short cytoplasmic domain, (semaphor…	BP	DOWN
GO:1901021	positive regulation of calcium ion transmembrane transporter activity	5.47e-06	0.000279	2.52	9959	31	2546	20	[Jph2 - junctophilin 2, P2ry6 - pyrimidinergic receptor p2y, g-protein coupled, 6, Stac - sh3 and cysteine rich domain, Pkd2 - polycystic kidney disease 2 (autosomal dominant), Ank2 - ankyrin 2, neuronal, Asph - aspartate-beta-hydroxylase, Ryr2 - ryanodine receptor 2, cardiac, Hspa2 - heat shock protein 2, Cacnb4 - calcium channel, voltage-dependent, beta 4 subunit, Trdn - triadin, Casq1 - calseq…	BP	DOWN
GO:0072511	divalent inorganic cation transport	5.5e-06	0.000279	1.64	9959	155	2546	65	[Jph2 - junctophilin 2, Jph3 - junctophilin 3, Ramp1 - receptor (g protein-coupled) activity modifying protein 1, Nfatc1 - nuclear factor of activated t-cells, cytoplasmic, calcineurin-dependent 1, Cacna1h - calcium channel, voltage-dependent, t type, alpha 1h subunit, Asph - aspartate-beta-hydroxylase, Nipal2 - nipa-like domain containing 2, Coro1a - coronin, actin binding protein 1a, Trpc4 - tr…	BP	DOWN
GO:0008217	regulation of blood pressure	6.07e-06	0.000307	1.85	9959	91	2546	43	[Gch1 - gtp cyclohydrolase 1, Agtr1b - angiotensin ii receptor, type 1b, Acvrl1 - activin a receptor type ii-like 1, Nos3 - nitric oxide synthase 3, endothelial cell, Scnn1a - sodium channel, nonvoltage-gated 1 alpha, Nos1 - nitric oxide synthase 1, neuronal, Cd34 - cd34 molecule, Gnas - gnas complex locus, Enpep - glutamyl aminopeptidase, Grip2 - glutamate receptor interacting protein 2, Rasl10b…	BP	DOWN
GO:0050708	regulation of protein secretion	6.2e-06	0.000313	1.47	9959	268	2546	101	[Adcy5 - adenylate cyclase 5, Exph5 - exophilin 5, Arid5a - at rich interactive domain 5a (mrf1 like), Nos1 - nitric oxide synthase 1, neuronal, Socs1 - suppressor of cytokine signaling 1, Blk - b lymphoid tyrosine kinase, Nr1d1 - nuclear receptor subfamily 1, group d, member 1, Csf1r - colony stimulating factor 1 receptor, Oxct1 - 3-oxoacid coa transferase 1, Syt11 - synaptotagmin xi, Agtr2 - an…	BP	DOWN
GO:0042327	positive regulation of phosphorylation	6.21e-06	0.000312	1.29	9959	661	2546	218	[Cdk5r1 - cyclin-dependent kinase 5, regulatory subunit 1 (p35), Cxcr4 - chemokine (c-x-c motif) receptor 4, Peli2 - pellino e3 ubiquitin protein ligase family member 2, Ptprj - protein tyrosine phosphatase, receptor type, j, Gdf10 - growth differentiation factor 10, Il1rn - interleukin 1 receptor antagonist, Fcgr2b - fc fragment of igg, low affinity iib, receptor (cd32), Csf1r - colony stimulati…	BP	DOWN
GO:0030336	negative regulation of cell migration	6.28e-06	0.000315	1.58	9959	183	2546	74	[Magi2 - membrane associated guanylate kinase, ww and pdz domain containing 2, Limch1 - lim and calponin homology domains 1, Synj2bp - synaptojanin 2 binding protein, Sema6d - sema domain, transmembrane domain (tm), and cytoplasmic domain, (semaphorin) 6d, Acvrl1 - activin a receptor type ii-like 1, Adamts9 - adam metallopeptidase with thrombospondin type 1 motif, 9, Dusp1 - dual specificity phos…	BP	DOWN
GO:0001503	ossification	6.47e-06	0.000323	1.83	9959	94	2546	44	[Igf2 - insulin-like growth factor 2, Plxnb1 - plexin b1, Impad1 - inositol monophosphatase domain containing 1, Xylt1 - xylosyltransferase 1, Dchs1 - dachsous 1 (drosophila), Gpld1 - glycosylphosphatidylinositol specific phospholipase d1, Igsf10 - immunoglobulin superfamily, member 10, Ibsp - integrin-binding sialoprotein, Comp - cartilage oligomeric matrix protein, Thra - thyroid hormone recept…	BP	DOWN
GO:0043949	regulation of cAMP-mediated signaling	6.81e-06	0.000339	2.39	9959	36	2546	22	[Aplnr - apelin receptor, Sstr4 - somatostatin receptor 4, Cxcl11 - chemokine (c-x-c motif) ligand 11, Nos1 - nitric oxide synthase 1, neuronal, Ube2b - ubiquitin-conjugating enzyme e2b, Arrdc3 - arrestin domain containing 3, Atp2b4 - atpase, ca++ transporting, plasma membrane 4, Adcyap1r1 - adenylate cyclase activating polypeptide 1 receptor 1, Gnas - gnas complex locus, Rasd2 - rasd family, mem…	BP	DOWN
GO:0050906	detection of stimulus involved in sensory perception	6.81e-06	0.000337	2.39	9959	36	2546	22	[Igf1 - insulin-like growth factor 1, Plcb2 - phospholipase c, beta 2, Sema5b - sema domain, seven thrombospondin repeats (type 1 and type 1-like), transmembrane domain (tm) and short cytoplasmic domain, (semaphorin) 5b, Olr1387 - olfactory receptor 1387, Rtp4 - receptor (chemosensory) transporter protein 4, Tas2r143 - taste receptor, type 2, member 143, Tas2r135 - taste receptor, type 2, member …	BP	DOWN
GO:0048871	multicellular organismal homeostasis	6.82e-06	0.000337	2.1	9959	56	2546	30	[Aqp1 - aquaporin 1, Scnn1a - sodium channel, nonvoltage-gated 1 alpha, Alox12 - arachidonate 12-lipoxygenase, Il1rn - interleukin 1 receptor antagonist, C1qtnf9 - c1q and tumor necrosis factor related protein 9, Ppargc1a - peroxisome proliferator-activated receptor gamma, coactivator 1 alpha, Nr1d1 - nuclear receptor subfamily 1, group d, member 1, Ppp1r13l - protein phosphatase 1, regulatory su…	BP	DOWN
GO:0010522	regulation of calcium ion transport into cytosol	6.94e-06	0.000341	1.96	9959	72	2546	36	[Ptk2b - protein tyrosine kinase 2 beta, Jph3 - junctophilin 3, Jph2 - junctophilin 2, Aplnr - apelin receptor, Dmd - dystrophin, Diaph1 - diaphanous-related formin 1, Hrc - histidine rich calcium binding protein, Asph - aspartate-beta-hydroxylase, Chd7 - chromodomain helicase dna binding protein 7, Adcyap1r1 - adenylate cyclase activating polypeptide 1 receptor 1, Coro1a - coronin, actin binding…	BP	DOWN
GO:0019722	calcium-mediated signaling	6.94e-06	0.00034	1.96	9959	72	2546	36	[Nfatc1 - nuclear factor of activated t-cells, cytoplasmic, calcineurin-dependent 1, Dmd - dystrophin, Cxcr4 - chemokine (c-x-c motif) receptor 4, Ccrl2 - chemokine (c-c motif) receptor-like 2, Ptprj - protein tyrosine phosphatase, receptor type, j, Ptprc - protein tyrosine phosphatase, receptor type, c, Ppp1r9a - protein phosphatase 1, regulatory subunit 9a, Ncald - neurocalcin delta, Kdr - kina…	BP	DOWN
GO:0071219	cellular response to molecule of bacterial origin	7.14e-06	0.000349	1.68	9959	135	2546	58	[Vwf - von willebrand factor, Arid5a - at rich interactive domain 5a (mrf1 like), Il1rn - interleukin 1 receptor antagonist, Cfh - complement factor h, Nr1d1 - nuclear receptor subfamily 1, group d, member 1, Fcgr2b - fc fragment of igg, low affinity iib, receptor (cd32), Stap1 - signal transducing adaptor family member 1, Src - v-src avian sarcoma (schmidt-ruppin a-2) viral oncogene homolog, Irf…	BP	DOWN
GO:0046883	regulation of hormone secretion	7.15e-06	0.000348	1.64	9959	153	2546	64	[Adcy5 - adenylate cyclase 5, Nos1 - nitric oxide synthase 1, neuronal, Chd7 - chromodomain helicase dna binding protein 7, Blk - b lymphoid tyrosine kinase, Nkx6-1 - nk6 homeobox 1, Nr1d1 - nuclear receptor subfamily 1, group d, member 1, Oxct1 - 3-oxoacid coa transferase 1, Agtr2 - angiotensin ii receptor, type 2, Sybu - syntabulin (syntaxin-interacting), Trpm4 - transient receptor potential ca…	BP	DOWN
GO:0045321	leukocyte activation	7.17e-06	0.000348	1.5	9959	240	2546	92	[Ptk2b - protein tyrosine kinase 2 beta, Jag2 - jagged 2, Nfatc1 - nuclear factor of activated t-cells, cytoplasmic, calcineurin-dependent 1, Ep300 - e1a binding protein p300, Cxcr4 - chemokine (c-x-c motif) receptor 4, Chd7 - chromodomain helicase dna binding protein 7, Ptprj - protein tyrosine phosphatase, receptor type, j, Dock11 - dedicator of cytokinesis 11, Rsad2 - radical s-adenosyl methio…	BP	DOWN
GO:0010562	positive regulation of phosphorus metabolic process	7.25e-06	0.000351	1.28	9959	711	2546	232	[Cdk5r1 - cyclin-dependent kinase 5, regulatory subunit 1 (p35), Ppp1r12a - protein phosphatase 1, regulatory subunit 12a, Cxcr4 - chemokine (c-x-c motif) receptor 4, Peli2 - pellino e3 ubiquitin protein ligase family member 2, Ptprj - protein tyrosine phosphatase, receptor type, j, Adcyap1r1 - adenylate cyclase activating polypeptide 1 receptor 1, Gdf10 - growth differentiation factor 10, Il1rn …	BP	DOWN
GO:0045937	positive regulation of phosphate metabolic process	7.25e-06	0.00035	1.28	9959	711	2546	232	[Cdk5r1 - cyclin-dependent kinase 5, regulatory subunit 1 (p35), Ppp1r12a - protein phosphatase 1, regulatory subunit 12a, Cxcr4 - chemokine (c-x-c motif) receptor 4, Peli2 - pellino e3 ubiquitin protein ligase family member 2, Ptprj - protein tyrosine phosphatase, receptor type, j, Adcyap1r1 - adenylate cyclase activating polypeptide 1 receptor 1, Gdf10 - growth differentiation factor 10, Il1rn …	BP	DOWN
GO:2000146	negative regulation of cell motility	7.58e-06	0.000364	1.56	9959	190	2546	76	[Magi2 - membrane associated guanylate kinase, ww and pdz domain containing 2, Limch1 - lim and calponin homology domains 1, Synj2bp - synaptojanin 2 binding protein, Sema6d - sema domain, transmembrane domain (tm), and cytoplasmic domain, (semaphorin) 6d, Acvrl1 - activin a receptor type ii-like 1, Adamts9 - adam metallopeptidase with thrombospondin type 1 motif, 9, Dusp1 - dual specificity phos…	BP	DOWN
GO:0045664	regulation of neuron differentiation	7.88e-06	0.000377	1.33	9959	505	2546	172	[Magi2 - membrane associated guanylate kinase, ww and pdz domain containing 2, Fgf13 - fibroblast growth factor 13, Cdk5r1 - cyclin-dependent kinase 5, regulatory subunit 1 (p35), Gli2 - gli family zinc finger 2, Sema5b - sema domain, seven thrombospondin repeats (type 1 and type 1-like), transmembrane domain (tm) and short cytoplasmic domain, (semaphorin) 5b, Cxcr4 - chemokine (c-x-c motif) rece…	BP	DOWN
GO:0050848	regulation of calcium-mediated signaling	8.21e-06	0.000391	1.99	9959	67	2546	34	[Jph3 - junctophilin 3, Jph2 - junctophilin 2, Ptk2b - protein tyrosine kinase 2 beta, Igf1 - insulin-like growth factor 1, Dmd - dystrophin, Hrc - histidine rich calcium binding protein, Mapt - microtubule-associated protein tau, Asph - aspartate-beta-hydroxylase, Lmcd1 - lim and cysteine-rich domains 1, Kdr - kinase insert domain receptor, Myoz1 - myozenin 1, Rcan1 - regulator of calcineurin 1,…	BP	DOWN
GO:0040017	positive regulation of locomotion	8.39e-06	0.000399	1.37	9959	411	2546	144	[Gli1 - gli family zinc finger 1, Sema5b - sema domain, seven thrombospondin repeats (type 1 and type 1-like), transmembrane domain (tm) and short cytoplasmic domain, (semaphorin) 5b, Epb4.1l5 - erythrocyte membrane protein band 4.1 like 5, C5ar1 - complement component 5a receptor 1, Nos3 - nitric oxide synthase 3, endothelial cell, Cxcr4 - chemokine (c-x-c motif) receptor 4, Diaph1 - diaphanous-…	BP	DOWN
GO:0042742	defense response to bacterium	8.53e-06	0.000404	1.91	9959	78	2546	38	[Hck - hemopoietic cell kinase, Naip6 - nlr family, apoptosis inhibitory protein 6, C5ar1 - complement component 5a receptor 1, LOC100910270 - uncharacterized loc100910270, Cebpb - ccaat/enhancer binding protein (c/ebp), beta, Il23a - interleukin 23, alpha subunit p19, Gbp4 - guanylate binding protein 4, Adamts4 - adam metallopeptidase with thrombospondin type 1 motif, 4, Tlr2 - toll-like recepto…	BP	DOWN
GO:0051588	regulation of neurotransmitter transport	9.55e-06	0.000451	1.8	9959	98	2546	45	[Rgs4 - regulator of g-protein signaling 4, Nos1 - nitric oxide synthase 1, neuronal, Prkcg - protein kinase c, gamma, Gdnf - glial cell derived neurotrophic factor, Pnkd - paroxysmal nonkinesigenic dyskinesia, Nr3c2 - nuclear receptor subfamily 3, group c, member 2, Ppp1r9a - protein phosphatase 1, regulatory subunit 9a, Vamp1 - vesicle-associated membrane protein 1, Ntrk2 - neurotrophic tyrosin…	BP	DOWN
GO:0051952	regulation of amine transport	9.79e-06	0.000461	2.16	9959	49	2546	27	[Rgs4 - regulator of g-protein signaling 4, Sdhd - succinate dehydrogenase complex, subunit d, integral membrane protein, Kcnb1 - potassium voltage gated channel, shab-related subfamily, member 1, Gdnf - glial cell derived neurotrophic factor, Il1rn - interleukin 1 receptor antagonist, Syt11 - synaptotagmin xi, Agtr2 - angiotensin ii receptor, type 2, P2ry12 - purinergic receptor p2y, g-protein c…	BP	DOWN
GO:1902259	regulation of delayed rectifier potassium channel activity	9.95e-06	0.000467	3.56	9959	11	2546	10	[Kcne4 - potassium voltage-gated channel, isk-related family, member 4, Ank3 - ankyrin 3, node of ranvier (ankyrin g), Kcne1 - potassium voltage-gated channel, isk-related family, member 1, Akap6 - a kinase (prka) anchor protein 6, Kcnab1 - potassium voltage-gated channel, shaker-related subfamily, beta member 1, Kcng1 - potassium voltage-gated channel, subfamily g, member 1, Kcnq1 - potassium vo…	BP	DOWN
GO:0045765	regulation of angiogenesis	1.03e-05	0.00048	1.53	9959	207	2546	81	[Ptk2b - protein tyrosine kinase 2 beta, Aqp1 - aquaporin 1, Synj2bp - synaptojanin 2 binding protein, Ptgis - prostaglandin i2 (prostacyclin) synthase, Acvrl1 - activin a receptor type ii-like 1, C5ar1 - complement component 5a receptor 1, Nos3 - nitric oxide synthase 3, endothelial cell, Cxcr4 - chemokine (c-x-c motif) receptor 4, Ngfr - nerve growth factor receptor, Adamts9 - adam metallopepti…	BP	DOWN
GO:0010243	response to organonitrogen compound	1.06e-05	0.000492	1.26	9959	788	2546	253	[Diaph1 - diaphanous-related formin 1, Cxcr4 - chemokine (c-x-c motif) receptor 4, Socs1 - suppressor of cytokine signaling 1, Rnf103 - ring finger protein 103, Il1rn - interleukin 1 receptor antagonist, Fcgr2b - fc fragment of igg, low affinity iib, receptor (cd32), Ntrk2 - neurotrophic tyrosine kinase, receptor, type 2, Trpm4 - transient receptor potential cation channel, subfamily m, member 4,…	BP	DOWN
GO:0048640	negative regulation of developmental growth	1.08e-05	0.0005	1.84	9959	87	2546	41	[Cdk5r1 - cyclin-dependent kinase 5, regulatory subunit 1 (p35), Rgs4 - regulator of g-protein signaling 4, Fgf13 - fibroblast growth factor 13, Sema6d - sema domain, transmembrane domain (tm), and cytoplasmic domain, (semaphorin) 6d, Sema5b - sema domain, seven thrombospondin repeats (type 1 and type 1-like), transmembrane domain (tm) and short cytoplasmic domain, (semaphorin) 5b, Pi16 - peptida…	BP	DOWN
GO:0071417	cellular response to organonitrogen compound	1.13e-05	0.000524	1.37	9959	403	2546	141	[Dnmt3a - dna (cytosine-5-)-methyltransferase 3 alpha, Nos3 - nitric oxide synthase 3, endothelial cell, Klf10 - kruppel-like factor 10, Diaph1 - diaphanous-related formin 1, Ube2b - ubiquitin-conjugating enzyme e2b, Nos1 - nitric oxide synthase 1, neuronal, Ngfr - nerve growth factor receptor, Socs1 - suppressor of cytokine signaling 1, Il1rn - interleukin 1 receptor antagonist, Akap7 - a kinase…	BP	DOWN
GO:0045444	fat cell differentiation	1.15e-05	0.000528	1.83	9959	90	2546	42	[Nr4a2 - nuclear receptor subfamily 4, group a, member 2, Mb - myoglobin, Lama4 - laminin, alpha 4, Ep300 - e1a binding protein p300, Tbl1x - transducin (beta)-like 1 x-linked, Socs1 - suppressor of cytokine signaling 1, Creb5 - camp responsive element binding protein 5, LOC100910270 - uncharacterized loc100910270, Gdf10 - growth differentiation factor 10, Cebpb - ccaat/enhancer binding protein (…	BP	DOWN
GO:0051899	membrane depolarization	1.17e-05	0.000537	2.72	9959	23	2546	16	[Kcnh2 - potassium voltage-gated channel, subfamily h (eag-related), member 2, Scn3b - sodium channel, voltage-gated, type iii, beta, Scn1b - sodium channel, voltage-gated, type i, beta, Cacna1h - calcium channel, voltage-dependent, t type, alpha 1h subunit, Prkcz - protein kinase c, zeta, Cacna1g - calcium channel, voltage-dependent, t type, alpha 1g subunit, Scn7a - sodium channel, voltage-gate…	BP	DOWN
GO:0030182	neuron differentiation	1.17e-05	0.000536	1.61	9959	158	2546	65	[Rom1 - retinal outer segment membrane protein 1, Cdk5r1 - cyclin-dependent kinase 5, regulatory subunit 1 (p35), Gli2 - gli family zinc finger 2, Ier2 - immediate early response 2, Dnmt3a - dna (cytosine-5-)-methyltransferase 3 alpha, Mapt - microtubule-associated protein tau, Ddit4 - dna-damage-inducible transcript 4, Nrbp2 - nuclear receptor binding protein 2, Nkx6-1 - nk6 homeobox 1, Ptpru - …	BP	DOWN
GO:0071222	cellular response to lipopolysaccharide	1.22e-05	0.000558	1.67	9959	131	2546	56	[Vwf - von willebrand factor, Arid5a - at rich interactive domain 5a (mrf1 like), Il1rn - interleukin 1 receptor antagonist, Cfh - complement factor h, Nr1d1 - nuclear receptor subfamily 1, group d, member 1, Fcgr2b - fc fragment of igg, low affinity iib, receptor (cd32), Stap1 - signal transducing adaptor family member 1, Src - v-src avian sarcoma (schmidt-ruppin a-2) viral oncogene homolog, Irf…	BP	DOWN
GO:0002253	activation of immune response	1.23e-05	0.000559	1.66	9959	137	2546	58	[C5ar1 - complement component 5a receptor 1, C1s - complement component 1, s subcomponent, Blk - b lymphoid tyrosine kinase, Cfh - complement factor h, Tifa - traf-interacting protein with forkhead-associated domain, Serping1 - serpin peptidase inhibitor, clade g (c1 inhibitor), member 1, Fcgr2b - fc fragment of igg, low affinity iib, receptor (cd32), Pik3ap1 - phosphoinositide-3-kinase adaptor p…	BP	DOWN
GO:1903706	regulation of hemopoiesis	1.24e-05	0.000562	1.48	9959	246	2546	93	[Ptk2b - protein tyrosine kinase 2 beta, Hlx - h2.0-like homeobox, Tob2 - transducer of erbb2, 2, P4htm - prolyl 4-hydroxylase, transmembrane, Klf10 - kruppel-like factor 10, Prkcz - protein kinase c, zeta, Pnp - purine nucleoside phosphorylase, Socs1 - suppressor of cytokine signaling 1, Il23a - interleukin 23, alpha subunit p19, Rbp1 - retinol binding protein 1, cellular, Cd83 - cd83 molecule, …	BP	DOWN
GO:0006836	neurotransmitter transport	1.24e-05	0.000562	1.96	9959	68	2546	34	[Aqp1 - aquaporin 1, Ppfia3 - protein tyrosine phosphatase, receptor type, f polypeptide (ptprf), interacting protein (liprin), alpha 3, Slc22a1 - solute carrier family 22 (organic cation transporter), member 1, Slc6a7 - solute carrier family 6 (neurotransmitter transporter), member 7, Slc6a2 - solute carrier family 6 (neurotransmitter transporter), member 2, Ppt1 - palmitoyl-protein thioesterase…	BP	DOWN
GO:0007189	adenylate cyclase-activating G protein-coupled receptor signaling pathway	1.28e-05	0.000575	2.33	9959	37	2546	22	[Adcy5 - adenylate cyclase 5, Ramp1 - receptor (g protein-coupled) activity modifying protein 1, Gcgr - glucagon receptor, Adra2a - adrenoceptor alpha 2a, Gpr65 - g-protein coupled receptor 65, Cxcl11 - chemokine (c-x-c motif) ligand 11, Akap13 - a kinase (prka) anchor protein 13, Adcy9 - adenylate cyclase 9, Gnas - gnas complex locus, Gnal - guanine nucleotide binding protein, alpha stimulating,…	BP	DOWN
GO:0097553	calcium ion transmembrane import into cytosol	1.28e-05	0.000573	2.33	9959	37	2546	22	[Jph2 - junctophilin 2, Jph3 - junctophilin 3, Plcb2 - phospholipase c, beta 2, Pkd2 - polycystic kidney disease 2 (autosomal dominant), Mcoln3 - mucolipin 3, Ccl21 - chemokine (c-c motif) ligand 21, Ryr2 - ryanodine receptor 2, cardiac, Plce1 - phospholipase c, epsilon 1, Ccl19 - chemokine (c-c motif) ligand 19, Ryr3 - ryanodine receptor 3, Ptprc - protein tyrosine phosphatase, receptor type, c,…	BP	DOWN
GO:0050767	regulation of neurogenesis	1.28e-05	0.000573	1.3	9959	598	2546	198	[Fgf13 - fibroblast growth factor 13, Cdk5r1 - cyclin-dependent kinase 5, regulatory subunit 1 (p35), Sema5b - sema domain, seven thrombospondin repeats (type 1 and type 1-like), transmembrane domain (tm) and short cytoplasmic domain, (semaphorin) 5b, Cxcr4 - chemokine (c-x-c motif) receptor 4, Ctdsp1 - ctd (carboxy-terminal domain, rna polymerase ii, polypeptide a) small phosphatase 1, Nlgn3 - n…	BP	DOWN
GO:0007178	transmembrane receptor protein serine/threonine kinase signaling pathway	1.32e-05	0.000591	1.78	9959	99	2546	45	[Zfyve9 - zinc finger, fyve domain containing 9, Ltbp3 - latent transforming growth factor beta binding protein 3, Ptprk - protein tyrosine phosphatase, receptor type, k, Acvrl1 - activin a receptor type ii-like 1, Bambi - bmp and activin membrane-bound inhibitor, Wfikkn2 - wap, follistatin/kazal, immunoglobulin, kunitz and netrin domain containing 2, Comp - cartilage oligomeric matrix protein, P…	BP	DOWN
GO:0098542	defense response to other organism	1.39e-05	0.00062	1.58	9959	171	2546	69	[C5ar1 - complement component 5a receptor 1, Naip6 - nlr family, apoptosis inhibitory protein 6, Ddit4 - dna-damage-inducible transcript 4, Setd2 - set domain containing 2, Bst2 - bone marrow stromal cell antigen 2, Rsad2 - radical s-adenosyl methionine domain containing 2, Il23a - interleukin 23, alpha subunit p19, Apobec1 - apolipoprotein b mrna editing enzyme, catalytic polypeptide 1, Gbp4 - g…	BP	DOWN
GO:0032102	negative regulation of response to external stimulus	1.47e-05	0.000652	1.54	9959	193	2546	76	[Sema6d - sema domain, transmembrane domain (tm), and cytoplasmic domain, (semaphorin) 6d, Xylt1 - xylosyltransferase 1, Sema5b - sema domain, seven thrombospondin repeats (type 1 and type 1-like), transmembrane domain (tm) and short cytoplasmic domain, (semaphorin) 5b, Ptgis - prostaglandin i2 (prostacyclin) synthase, Alox12 - arachidonate 12-lipoxygenase, Dusp1 - dual specificity phosphatase 1,…	BP	DOWN
GO:0071624	positive regulation of granulocyte chemotaxis	1.49e-05	0.00066	2.88	9959	19	2546	14	[Nckap1l - nck associated protein 1 like, C5ar1 - complement component 5a receptor 1, Ccl21 - chemokine (c-c motif) ligand 21, Cd74 - cd74 molecule, major histocompatibility complex, class ii invariant chain, Ccl19 - chemokine (c-c motif) ligand 19, Il23a - interleukin 23, alpha subunit p19, Fam65b - family with sequence similarity 65, member b, Dapk2 - death-associated protein kinase 2, Ednra - …	BP	DOWN
GO:0090023	positive regulation of neutrophil chemotaxis	1.49e-05	0.000658	2.88	9959	19	2546	14	[Nckap1l - nck associated protein 1 like, C5ar1 - complement component 5a receptor 1, Ccl21 - chemokine (c-c motif) ligand 21, Cd74 - cd74 molecule, major histocompatibility complex, class ii invariant chain, Ccl19 - chemokine (c-c motif) ligand 19, Il23a - interleukin 23, alpha subunit p19, Fam65b - family with sequence similarity 65, member b, Dapk2 - death-associated protein kinase 2, Ednra - …	BP	DOWN
GO:0001932	regulation of protein phosphorylation	1.54e-05	0.000679	1.23	9959	937	2546	294	[Cdk5r1 - cyclin-dependent kinase 5, regulatory subunit 1 (p35), Dusp4 - dual specificity phosphatase 4, Rasip1 - ras interacting protein 1, Hrc - histidine rich calcium binding protein, Cxcr4 - chemokine (c-x-c motif) receptor 4, Socs1 - suppressor of cytokine signaling 1, Peli2 - pellino e3 ubiquitin protein ligase family member 2, Ptprj - protein tyrosine phosphatase, receptor type, j, Taf7 - …	BP	DOWN
GO:0051968	positive regulation of synaptic transmission, glutamatergic	1.56e-05	0.000683	3.13	9959	15	2546	12	[Ptk2b - protein tyrosine kinase 2 beta, Egfr - epidermal growth factor receptor, Ntrk2 - neurotrophic tyrosine kinase, receptor, type 2, Cacng7 - calcium channel, voltage-dependent, gamma subunit 7, Nrxn1 - neurexin 1, Ngfr - nerve growth factor receptor, Ptgs2 - prostaglandin-endoperoxide synthase 2, Adora2a - adenosine a2a receptor, Shank3 - sh3 and multiple ankyrin repeat domains 3, Nlgn1 - n…	BP	DOWN
GO:0030198	extracellular matrix organization	1.57e-05	0.000685	1.62	9959	147	2546	61	[Col15a1 - collagen, type xv, alpha 1, Ctss - cathepsin s, Col4a1 - collagen, type iv, alpha 1, Olfml2a - olfactomedin-like 2a, Abi3bp - abi family, member 3 (nesh) binding protein, Adamts9 - adam metallopeptidase with thrombospondin type 1 motif, 9, Scara3 - scavenger receptor class a, member 3, Fbln1 - fibulin 1, Col4a3 - collagen, type iv, alpha 3, Vit - vitrin, Adamtsl2 - adamts-like 2, Bcl3 …	BP	DOWN
GO:0045428	regulation of nitric oxide biosynthetic process	1.72e-05	0.000751	2.17	9959	45	2546	25	[Ptk2b - protein tyrosine kinase 2 beta, Igf1 - insulin-like growth factor 1, Ptgis - prostaglandin i2 (prostacyclin) synthase, Cd34 - cd34 molecule, Esr1 - estrogen receptor 1, Sod2 - superoxide dismutase 2, mitochondrial, Klf4 - kruppel-like factor 4 (gut), Trpv1 - transient receptor potential cation channel, subfamily v, member 1, Tlr2 - toll-like receptor 2, Il1b - interleukin 1 beta, Il6 - i…	BP	DOWN
GO:0050907	detection of chemical stimulus involved in sensory perception	1.81e-05	0.000786	3.91	9959	8	2546	8	[Olr854 - olfactory receptor 854, Plcb2 - phospholipase c, beta 2, Trpv1 - transient receptor potential cation channel, subfamily v, member 1, Olr1387 - olfactory receptor 1387, Rtp4 - receptor (chemosensory) transporter protein 4, Tas2r143 - taste receptor, type 2, member 143, Tas2r135 - taste receptor, type 2, member 135, Tas2r126 - taste receptor, type 2, member 126]	BP	DOWN
GO:0031650	regulation of heat generation	1.81e-05	0.000784	3.91	9959	8	2546	8	[Slc27a1 - solute carrier family 27 (fatty acid transporter), member 1, Ccr5 - chemokine (c-c motif) receptor 5, Tnf - tumor necrosis factor, Ptger3 - prostaglandin e receptor 3 (subtype ep3), Arrdc3 - arrestin domain containing 3, Il1b - interleukin 1 beta, Pla2g4a - phospholipase a2, group iva (cytosolic, calcium-dependent), Ptgs2 - prostaglandin-endoperoxide synthase 2]	BP	DOWN
GO:0019725	cellular homeostasis	1.84e-05	0.000793	1.31	9959	515	2546	173	[Adcy5 - adenylate cyclase 5, Jph2 - junctophilin 2, C5ar1 - complement component 5a receptor 1, Cxcr4 - chemokine (c-x-c motif) receptor 4, Hrc - histidine rich calcium binding protein, Nos1 - nitric oxide synthase 1, neuronal, Asph - aspartate-beta-hydroxylase, Ngfr - nerve growth factor receptor, Adcyap1r1 - adenylate cyclase activating polypeptide 1 receptor 1, Gpr4 - g protein-coupled recept…	BP	DOWN
GO:0009266	response to temperature stimulus	1.86e-05	0.000801	1.58	9959	163	2546	66	[Vwf - von willebrand factor, Xylt1 - xylosyltransferase 1, Acadm - acyl-coa dehydrogenase, c-4 to c-12 straight chain, Nos3 - nitric oxide synthase 3, endothelial cell, Cxcr4 - chemokine (c-x-c motif) receptor 4, Nos1 - nitric oxide synthase 1, neuronal, Ngfr - nerve growth factor receptor, Thra - thyroid hormone receptor alpha, Sod2 - superoxide dismutase 2, mitochondrial, Trpv1 - transient rec…	BP	DOWN
GO:1903524	positive regulation of blood circulation	1.94e-05	0.000834	2.07	9959	53	2546	28	[Rgs4 - regulator of g-protein signaling 4, Gch1 - gtp cyclohydrolase 1, Cacna1h - calcium channel, voltage-dependent, t type, alpha 1h subunit, Scn3b - sodium channel, voltage-gated, type iii, beta, Hrc - histidine rich calcium binding protein, Rnf207 - ring finger protein 207, Alox5 - arachidonate 5-lipoxygenase, Adra1d - adrenoceptor alpha 1d, Tbxas1 - thromboxane a synthase 1, platelet, Trpm4…	BP	DOWN
GO:0036293	response to decreased oxygen levels	1.99e-05	0.00085	1.42	9959	294	2546	107	[Apold1 - apolipoprotein l domain containing 1, Dnmt3a - dna (cytosine-5-)-methyltransferase 3 alpha, Nos3 - nitric oxide synthase 3, endothelial cell, Cxcr4 - chemokine (c-x-c motif) receptor 4, Ddit4 - dna-damage-inducible transcript 4, Nos1 - nitric oxide synthase 1, neuronal, Ube2b - ubiquitin-conjugating enzyme e2b, Vcam1 - vascular cell adhesion molecule 1, Egln3 - egl nine homolog 3 (c. el…	BP	DOWN
GO:0001666	response to hypoxia	2.01e-05	0.000857	1.43	9959	281	2546	103	[Apold1 - apolipoprotein l domain containing 1, Dnmt3a - dna (cytosine-5-)-methyltransferase 3 alpha, Nos3 - nitric oxide synthase 3, endothelial cell, Cxcr4 - chemokine (c-x-c motif) receptor 4, Ddit4 - dna-damage-inducible transcript 4, Nos1 - nitric oxide synthase 1, neuronal, Ube2b - ubiquitin-conjugating enzyme e2b, Vcam1 - vascular cell adhesion molecule 1, Egln3 - egl nine homolog 3 (c. el…	BP	DOWN
GO:0007162	negative regulation of cell adhesion	2.14e-05	0.000911	1.56	9959	176	2546	70	[Plxnb1 - plexin b1, Hlx - h2.0-like homeobox, Epcam - epithelial cell adhesion molecule, Epb4.1l5 - erythrocyte membrane protein band 4.1 like 5, Acvrl1 - activin a receptor type ii-like 1, Alox12 - arachidonate 12-lipoxygenase, Socs1 - suppressor of cytokine signaling 1, Dusp1 - dual specificity phosphatase 1, Lag3 - lymphocyte-activation gene 3, Il1rn - interleukin 1 receptor antagonist, Sema5…	BP	DOWN
GO:0030279	negative regulation of ossification	2.15e-05	0.000911	2.12	9959	48	2546	26	[Ptk2b - protein tyrosine kinase 2 beta, Nfatc1 - nuclear factor of activated t-cells, cytoplasmic, calcineurin-dependent 1, Ltbp3 - latent transforming growth factor beta binding protein 3, Ranbp3l - ran binding protein 3-like, Gdf10 - growth differentiation factor 10, Bcor - bcl6 co-repressor, P2ry2 - purinergic receptor p2y, g-protein coupled, 2, Sost - sclerostin, Trpm4 - transient receptor p…	BP	DOWN
GO:1902105	regulation of leukocyte differentiation	2.2e-05	0.000928	1.56	9959	173	2546	69	[Hlx - h2.0-like homeobox, Tob2 - transducer of erbb2, 2, Klf10 - kruppel-like factor 10, Prkcz - protein kinase c, zeta, Socs1 - suppressor of cytokine signaling 1, Pnp - purine nucleoside phosphorylase, Il23a - interleukin 23, alpha subunit p19, Rbp1 - retinol binding protein 1, cellular, Atp11c - atpase, class vi, type 11c, Csf1r - colony stimulating factor 1 receptor, Cd83 - cd83 molecule, Hc…	BP	DOWN
GO:0002694	regulation of leukocyte activation	2.28e-05	0.00096	1.43	9959	285	2546	104	[Socs1 - suppressor of cytokine signaling 1, Il13ra1 - interleukin 13 receptor, alpha 1, Lag3 - lymphocyte-activation gene 3, Coro1a - coronin, actin binding protein 1a, Il23a - interleukin 23, alpha subunit p19, Atp11c - atpase, class vi, type 11c, Fcgr2b - fc fragment of igg, low affinity iib, receptor (cd32), Vcam1 - vascular cell adhesion molecule 1, Bcl6 - b-cell cll/lymphoma 6, Il15ra - int…	BP	DOWN
GO:0040008	regulation of growth	2.3e-05	0.000965	1.32	9959	486	2546	164	[Fgf13 - fibroblast growth factor 13, Cdk5r1 - cyclin-dependent kinase 5, regulatory subunit 1 (p35), Gli1 - gli family zinc finger 1, Sema5b - sema domain, seven thrombospondin repeats (type 1 and type 1-like), transmembrane domain (tm) and short cytoplasmic domain, (semaphorin) 5b, Hopx - hop homeobox, Pi16 - peptidase inhibitor 16, Cxcr4 - chemokine (c-x-c motif) receptor 4, Chd7 - chromodomai…	BP	DOWN
GO:1902107	positive regulation of leukocyte differentiation	2.32e-05	0.000973	1.77	9959	95	2546	43	[Nckap1l - nck associated protein 1 like, Hlx - h2.0-like homeobox, Klf10 - kruppel-like factor 10, Prkcz - protein kinase c, zeta, Slc9b2 - solute carrier family 9, subfamily b (nha2, cation proton antiporter 2), member 2, Cd74 - cd74 molecule, major histocompatibility complex, class ii invariant chain, Pnp - purine nucleoside phosphorylase, Socs1 - suppressor of cytokine signaling 1, Ptprc - pr…	BP	DOWN
GO:0007229	integrin-mediated signaling pathway	2.48e-05	0.00103	1.93	9959	67	2546	33	[Ptk2b - protein tyrosine kinase 2 beta, Tyrobp - tyro protein tyrosine kinase binding protein, Itga7 - integrin, alpha 7, Ibsp - integrin-binding sialoprotein, Adamts9 - adam metallopeptidase with thrombospondin type 1 motif, 9, Itgax - integrin, alpha x, Adamts15 - adam metallopeptidase with thrombospondin type 1 motif, 15, Itga10 - integrin, alpha 10, Itgb8 - integrin, beta 8, Fermt1 - fermiti…	BP	DOWN
GO:0099536	synaptic signaling	2.59e-05	0.00108	1.72	9959	107	2546	47	[Agrn - agrin, Synj2bp - synaptojanin 2 binding protein, Camk2n1 - calcium/calmodulin-dependent protein kinase ii inhibitor 1, Nos1 - nitric oxide synthase 1, neuronal, Cacna1g - calcium channel, voltage-dependent, t type, alpha 1g subunit, Prkcg - protein kinase c, gamma, Ntf3 - neurotrophin 3, Sv2c - synaptic vesicle glycoprotein 2c, Cav2 - caveolin 2, Efnb3 - ephrin b3, Penk - proenkephalin, R…	BP	DOWN
GO:0099537	trans-synaptic signaling	2.59e-05	0.00107	1.72	9959	107	2546	47	[Agrn - agrin, Synj2bp - synaptojanin 2 binding protein, Camk2n1 - calcium/calmodulin-dependent protein kinase ii inhibitor 1, Nos1 - nitric oxide synthase 1, neuronal, Cacna1g - calcium channel, voltage-dependent, t type, alpha 1g subunit, Prkcg - protein kinase c, gamma, Ntf3 - neurotrophin 3, Sv2c - synaptic vesicle glycoprotein 2c, Cav2 - caveolin 2, Efnb3 - ephrin b3, Penk - proenkephalin, R…	BP	DOWN
GO:0050796	regulation of insulin secretion	2.59e-05	0.00107	1.72	9959	107	2546	47	[Adcy5 - adenylate cyclase 5, Gpld1 - glycosylphosphatidylinositol specific phospholipase d1, Kcnb1 - potassium voltage gated channel, shab-related subfamily, member 1, Slc9b2 - solute carrier family 9, subfamily b (nha2, cation proton antiporter 2), member 2, Nos1 - nitric oxide synthase 1, neuronal, Blk - b lymphoid tyrosine kinase, Nkx6-1 - nk6 homeobox 1, Nr1d1 - nuclear receptor subfamily 1,…	BP	DOWN
GO:0051147	regulation of muscle cell differentiation	2.69e-05	0.00111	1.69	9959	116	2546	50	[Rgs4 - regulator of g-protein signaling 4, Rbpms2 - rna binding protein with multiple splicing 2, Smarcd3 - swi/snf related, matrix associated, actin dependent regulator of chromatin, subfamily d, member 3, Nfatc1 - nuclear factor of activated t-cells, cytoplasmic, calcineurin-dependent 1, Hopx - hop homeobox, Pi16 - peptidase inhibitor 16, Ep300 - e1a binding protein p300, Rbm24 - rna binding m…	BP	DOWN
GO:0090276	regulation of peptide hormone secretion	2.71e-05	0.00112	1.68	9959	119	2546	51	[Adcy5 - adenylate cyclase 5, Nos1 - nitric oxide synthase 1, neuronal, Chd7 - chromodomain helicase dna binding protein 7, Blk - b lymphoid tyrosine kinase, Nkx6-1 - nk6 homeobox 1, Nr1d1 - nuclear receptor subfamily 1, group d, member 1, Oxct1 - 3-oxoacid coa transferase 1, Trpm4 - transient receptor potential cation channel, subfamily m, member 4, Sybu - syntabulin (syntaxin-interacting), Trpm…	BP	DOWN
GO:1903708	positive regulation of hemopoiesis	2.72e-05	0.00112	1.67	9959	122	2546	52	[Hlx - h2.0-like homeobox, Klf10 - kruppel-like factor 10, Prkcz - protein kinase c, zeta, Socs1 - suppressor of cytokine signaling 1, Pnp - purine nucleoside phosphorylase, Il23a - interleukin 23, alpha subunit p19, Atp11c - atpase, class vi, type 11c, Csf1r - colony stimulating factor 1 receptor, Cd83 - cd83 molecule, Hcls1 - hematopoietic cell specific lyn substrate 1, Bcl6 - b-cell cll/lympho…	BP	DOWN
GO:0048468	cell development	2.77e-05	0.00113	1.34	9959	433	2546	148	[Magi2 - membrane associated guanylate kinase, ww and pdz domain containing 2, Gli2 - gli family zinc finger 2, Exph5 - exophilin 5, Impad1 - inositol monophosphatase domain containing 1, Popdc2 - popeye domain containing 2, Mfsd2a - major facilitator superfamily domain containing 2a, Cxcr4 - chemokine (c-x-c motif) receptor 4, Gdf10 - growth differentiation factor 10, Gpr4 - g protein-coupled re…	BP	DOWN
GO:0035023	regulation of Rho protein signal transduction	2.96e-05	0.00121	1.78	9959	90	2546	41	[Plekhg3 - pleckstrin homology domain containing, family g (with rhogef domain) member 3, Ngef - neuronal guanine nucleotide exchange factor, Rasip1 - ras interacting protein 1, Kank1 - kn motif and ankyrin repeat domains 1, Ngfr - nerve growth factor receptor, Fgd4 - fyve, rhogef and ph domain containing 4, Rasgrf2 - ras protein-specific guanine nucleotide-releasing factor 2, Gpr4 - g protein-co…	BP	DOWN
GO:0015718	monocarboxylic acid transport	2.98e-05	0.00121	1.96	9959	62	2546	31	[Slc27a1 - solute carrier family 27 (fatty acid transporter), member 1, Mfsd2a - major facilitator superfamily domain containing 2a, Slc16a3 - solute carrier family 16 (monocarboxylate transporter), member 3, Proca1 - protein interacting with cyclin a1, Slc16a7 - solute carrier family 16 (monocarboxylate transporter), member 7, Trpc4 - transient receptor potential cation channel, subfamily c, mem…	BP	DOWN
GO:0002526	acute inflammatory response	3.02e-05	0.00122	2.28	9959	36	2546	21	[Adra2a - adrenoceptor alpha 2a, Cxcl1 - chemokine (c-x-c motif) ligand 1, Kng1 - kininogen 1, Alox5 - arachidonate 5-lipoxygenase, Il1rn - interleukin 1 receptor antagonist, Ass1 - argininosuccinate synthase 1, Itih4 - inter-alpha-trypsin inhibitor heavy chain family, member 4, Fcgr1a - fc fragment of igg, high affinity ia, receptor (cd64), Vcam1 - vascular cell adhesion molecule 1, Nupr1 - nucl…	BP	DOWN
GO:0042116	macrophage activation	3.22e-05	0.0013	2.67	9959	22	2546	15	[Tyrobp - tyro protein tyrosine kinase binding protein, Sbno2 - strawberry notch homolog 2 (drosophila), Clu - clusterin, Jun - jun proto-oncogene, Cx3cr1 - chemokine (c-x3-c motif) receptor 1, Cx3cl1 - chemokine (c-x3-c motif) ligand 1, Trpv1 - transient receptor potential cation channel, subfamily v, member 1, Tlr8 - toll-like receptor 8, Tlr2 - toll-like receptor 2, Aif1 - allograft inflammato…	BP	DOWN
GO:0007157	heterophilic cell-cell adhesion via plasma membrane cell adhesion molecules	3.22e-05	0.0013	2.67	9959	22	2546	15	[Fat4 - fat atypical cadherin 4, Itgal - integrin, alpha l, Dchs1 - dachsous 1 (drosophila), Tenm4 - teneurin transmembrane protein 4, Cadm3 - cell adhesion molecule 3, Nlgn1 - neuroligin 1, Amigo1 - adhesion molecule with ig like domain 1, Tenm3 - teneurin transmembrane protein 3, Vcam1 - vascular cell adhesion molecule 1, Ptprd - protein tyrosine phosphatase, receptor type, d, Cd6 - cd6 molecul…	BP	DOWN
GO:0043271	negative regulation of ion transport	3.46e-05	0.00139	1.7	9959	108	2546	47	[Ptk2b - protein tyrosine kinase 2 beta, Rgs4 - regulator of g-protein signaling 4, Kcnh2 - potassium voltage-gated channel, subfamily h (eag-related), member 2, Agrn - agrin, Rrad - ras-related associated with diabetes, Nos3 - nitric oxide synthase 3, endothelial cell, Plcb4 - phospholipase c, beta 4, Hes1 - hairy and enhancer of split 1 (drosophila), Usp2 - ubiquitin specific peptidase 2, Hrc -…	BP	DOWN
GO:0009636	response to toxic substance	3.48e-05	0.0014	1.35	9959	384	2546	133	[Dnmt3a - dna (cytosine-5-)-methyltransferase 3 alpha, Nos3 - nitric oxide synthase 3, endothelial cell, Nos1 - nitric oxide synthase 1, neuronal, Adcyap1r1 - adenylate cyclase activating polypeptide 1 receptor 1, Gnal - guanine nucleotide binding protein, alpha stimulating, olfactory type, Cfh - complement factor h, Apobec1 - apolipoprotein b mrna editing enzyme, catalytic polypeptide 1, Oxct1 -…	BP	DOWN
GO:0051048	negative regulation of secretion	3.51e-05	0.0014	1.63	9959	132	2546	55	[Nos1 - nitric oxide synthase 1, neuronal, Rsad2 - radical s-adenosyl methionine domain containing 2, Il1rn - interleukin 1 receptor antagonist, Fbln1 - fibulin 1, Cx3cl1 - chemokine (c-x3-c motif) ligand 1, Syt11 - synaptotagmin xi, Agtr2 - angiotensin ii receptor, type 2, Adtrp - androgen-dependent tfpi-regulating protein, Stk39 - serine threonine kinase 39, Cry2 - cryptochrome 2 (photolyase-li…	BP	DOWN
GO:0002764	immune response-regulating signaling pathway	3.53e-05	0.00141	1.68	9959	114	2546	49	[C5ar1 - complement component 5a receptor 1, Blk - b lymphoid tyrosine kinase, Tifa - traf-interacting protein with forkhead-associated domain, Fcgr2b - fc fragment of igg, low affinity iib, receptor (cd32), Pik3ap1 - phosphoinositide-3-kinase adaptor protein 1, Lcp2 - lymphocyte cytosolic protein 2, Havcr2 - hepatitis a virus cellular receptor 2, Fyb - fyn binding protein, Nfkbia - nuclear facto…	BP	DOWN
GO:0002269	leukocyte activation involved in inflammatory response	3.56e-05	0.00141	3.52	9959	10	2546	9	[Cx3cr1 - chemokine (c-x3-c motif) receptor 1, Cx3cl1 - chemokine (c-x3-c motif) ligand 1, Trpv1 - transient receptor potential cation channel, subfamily v, member 1, Tlr8 - toll-like receptor 8, Clu - clusterin, Tlr2 - toll-like receptor 2, Tlr3 - toll-like receptor 3, Jun - jun proto-oncogene, Nampt - nicotinamide phosphoribosyltransferase]	BP	DOWN
GO:0001774	microglial cell activation	3.56e-05	0.00141	3.52	9959	10	2546	9	[Cx3cr1 - chemokine (c-x3-c motif) receptor 1, Cx3cl1 - chemokine (c-x3-c motif) ligand 1, Tlr8 - toll-like receptor 8, Trpv1 - transient receptor potential cation channel, subfamily v, member 1, Clu - clusterin, Tlr2 - toll-like receptor 2, Tlr3 - toll-like receptor 3, Nampt - nicotinamide phosphoribosyltransferase, Jun - jun proto-oncogene]	BP	DOWN
GO:0002685	regulation of leukocyte migration	3.56e-05	0.00141	1.66	9959	120	2546	51	[Ptk2b - protein tyrosine kinase 2 beta, C5ar1 - complement component 5a receptor 1, Dusp1 - dual specificity phosphatase 1, Ptprj - protein tyrosine phosphatase, receptor type, j, Il23a - interleukin 23, alpha subunit p19, Cxcl14 - chemokine (c-x-c motif) ligand 14, Fam65b - family with sequence similarity 65, member b, Cx3cl1 - chemokine (c-x3-c motif) ligand 1, Stap1 - signal transducing adapt…	BP	DOWN
GO:0070372	regulation of ERK1 and ERK2 cascade	3.87e-05	0.00152	1.52	9959	185	2546	72	[Dusp4 - dual specificity phosphatase 4, Ptk2b - protein tyrosine kinase 2 beta, Synj2bp - synaptojanin 2 binding protein, C5ar1 - complement component 5a receptor 1, Prkcz - protein kinase c, zeta, Dusp1 - dual specificity phosphatase 1, Atf3 - activating transcription factor 3, Phlpp1 - ph domain and leucine rich repeat protein phosphatase 1, Fbln1 - fibulin 1, Csf1r - colony stimulating factor…	BP	DOWN
GO:0051209	release of sequestered calcium ion into cytosol	3.95e-05	0.00155	2.3	9959	34	2546	20	[Jph3 - junctophilin 3, Jph2 - junctophilin 2, Plcb2 - phospholipase c, beta 2, Pkd2 - polycystic kidney disease 2 (autosomal dominant), Mcoln3 - mucolipin 3, Ccl21 - chemokine (c-c motif) ligand 21, Ryr2 - ryanodine receptor 2, cardiac, Plce1 - phospholipase c, epsilon 1, Ccl19 - chemokine (c-c motif) ligand 19, Ryr3 - ryanodine receptor 3, Ptprc - protein tyrosine phosphatase, receptor type, c,…	BP	DOWN
GO:1901698	response to nitrogen compound	4.08e-05	0.0016	1.23	9959	830	2546	261	[Diaph1 - diaphanous-related formin 1, Cxcr4 - chemokine (c-x-c motif) receptor 4, Socs1 - suppressor of cytokine signaling 1, Rnf103 - ring finger protein 103, Il1rn - interleukin 1 receptor antagonist, Fcgr2b - fc fragment of igg, low affinity iib, receptor (cd32), Ntrk2 - neurotrophic tyrosine kinase, receptor, type 2, Map3k5 - mitogen-activated protein kinase kinase kinase 5, Trpm4 - transien…	BP	DOWN
GO:0060401	cytosolic calcium ion transport	4.09e-05	0.0016	2.03	9959	52	2546	27	[Jph2 - junctophilin 2, Jph3 - junctophilin 3, Plcb2 - phospholipase c, beta 2, Cacna1g - calcium channel, voltage-dependent, t type, alpha 1g subunit, Ptprc - protein tyrosine phosphatase, receptor type, c, Trpv1 - transient receptor potential cation channel, subfamily v, member 1, Slc25a23 - solute carrier family 25 (mitochondrial carrier; phosphate carrier), member 23, Trpm2 - transient recept…	BP	DOWN
GO:0051249	regulation of lymphocyte activation	4.22e-05	0.00164	1.45	9959	243	2546	90	[Hlx - h2.0-like homeobox, Prkcz - protein kinase c, zeta, Pnp - purine nucleoside phosphorylase, Socs1 - suppressor of cytokine signaling 1, Il13ra1 - interleukin 13 receptor, alpha 1, Lag3 - lymphocyte-activation gene 3, Coro1a - coronin, actin binding protein 1a, Efnb3 - ephrin b3, Il23a - interleukin 23, alpha subunit p19, Fam65b - family with sequence similarity 65, member b, Cd83 - cd83 mol…	BP	DOWN
GO:0048729	tissue morphogenesis	4.23e-05	0.00164	1.44	9959	256	2546	94	[Jag2 - jagged 2, Pspn - persephin, Gli2 - gli family zinc finger 2, Nfatc1 - nuclear factor of activated t-cells, cytoplasmic, calcineurin-dependent 1, Dchs1 - dachsous 1 (drosophila), Rasip1 - ras interacting protein 1, Acvrl1 - activin a receptor type ii-like 1, Epb4.1l5 - erythrocyte membrane protein band 4.1 like 5, Gpc3 - glypican 3, Nos3 - nitric oxide synthase 3, endothelial cell, Cxcr4 -…	BP	DOWN
GO:0048247	lymphocyte chemotaxis	4.35e-05	0.00169	2.83	9959	18	2546	13	[Ccl4 - chemokine (c-c motif) ligand 4, Ccl21 - chemokine (c-c motif) ligand 21, Cxcl11 - chemokine (c-x-c motif) ligand 11, Ccl2 - chemokine (c-c motif) ligand 2, Ccl19 - chemokine (c-c motif) ligand 19, Ccl6 - chemokine (c-c motif) ligand 6, Cx3cl1 - chemokine (c-x3-c motif) ligand 1, Gpr183 - g protein-coupled receptor 183, Ccl3 - chemokine (c-c motif) ligand 3, Ch25h - cholesterol 25-hydroxyl…	BP	DOWN
GO:0060306	regulation of membrane repolarization	4.48e-05	0.00173	2.46	9959	27	2546	17	[Kcnh2 - potassium voltage-gated channel, subfamily h (eag-related), member 2, Scn1b - sodium channel, voltage-gated, type i, beta, Ank2 - ankyrin 2, neuronal, Rnf207 - ring finger protein 207, Kcnq1 - potassium voltage-gated channel, kqt-like subfamily, member 1, Flna - filamin a, alpha, Akap7 - a kinase (prka) anchor protein 7, Kcne4 - potassium voltage-gated channel, isk-related family, member…	BP	DOWN
GO:0044706	multi-multicellular organism process	4.52e-05	0.00174	1.83	9959	77	2546	36	[Igf2 - insulin-like growth factor 2, Igf1 - insulin-like growth factor 1, Fosl2 - fos-like antigen 2, Nos3 - nitric oxide synthase 3, endothelial cell, Mapt - microtubule-associated protein tau, Nos1 - nitric oxide synthase 1, neuronal, Hspb1 - heat shock protein 1, Fosb - fbj osteosarcoma oncogene b, Il1rn - interleukin 1 receptor antagonist, Sts - steroid sulfatase (microsomal), isozyme s, Ddo…	BP	DOWN
GO:0086009	membrane repolarization	4.59e-05	0.00176	3.26	9959	12	2546	10	[Kcnh2 - potassium voltage-gated channel, subfamily h (eag-related), member 2, Kcne4 - potassium voltage-gated channel, isk-related family, member 4, Kcnj8 - potassium inwardly-rectifying channel, subfamily j, member 8, Kcnip2 - kv channel-interacting protein 2, Kcne1 - potassium voltage-gated channel, isk-related family, member 1, Kcna5 - potassium voltage-gated channel, shaker-related subfamily…	BP	DOWN
GO:0009611	response to wounding	4.75e-05	0.00182	1.51	9959	186	2546	72	[Jag2 - jagged 2, Aqp1 - aquaporin 1, Gli1 - gli family zinc finger 1, Nos3 - nitric oxide synthase 3, endothelial cell, Naip6 - nlr family, apoptosis inhibitory protein 6, Ngfr - nerve growth factor receptor, Dst - dystonin, Creb3l2 - camp responsive element binding protein 3-like 2, Slc1a3 - solute carrier family 1 (glial high affinity glutamate transporter), member 3, Sod2 - superoxide dismuta…	BP	DOWN
GO:0009410	response to xenobiotic stimulus	4.91e-05	0.00188	1.52	9959	183	2546	71	[Adcy5 - adenylate cyclase 5, Ptk2b - protein tyrosine kinase 2 beta, Agtr1b - angiotensin ii receptor, type 1b, Aqp1 - aquaporin 1, Rgs4 - regulator of g-protein signaling 4, Trim63 - tripartite motif containing 63, e3 ubiquitin protein ligase, Dnmt3a - dna (cytosine-5-)-methyltransferase 3 alpha, Nos3 - nitric oxide synthase 3, endothelial cell, Cxcr4 - chemokine (c-x-c motif) receptor 4, Ep300…	BP	DOWN
GO:1901623	regulation of lymphocyte chemotaxis	4.92e-05	0.00188	3.07	9959	14	2546	11	[Ptk2b - protein tyrosine kinase 2 beta, Ccl4 - chemokine (c-c motif) ligand 4, Oxsr1 - oxidative-stress responsive 1, Adam17 - adam metallopeptidase domain 17, Ccl3 - chemokine (c-c motif) ligand 3, Stk39 - serine threonine kinase 39, Ccl27 - chemokine (c-c motif) ligand 27, Ccl2 - chemokine (c-c motif) ligand 2, Cxcl10 - chemokine (c-x-c motif) ligand 10, Cxcl14 - chemokine (c-x-c motif) ligand…	BP	DOWN
GO:0042325	regulation of phosphorylation	5.03e-05	0.00191	1.2	9959	1022	2546	314	[Cdk5r1 - cyclin-dependent kinase 5, regulatory subunit 1 (p35), Dusp4 - dual specificity phosphatase 4, Rasip1 - ras interacting protein 1, Cxcr4 - chemokine (c-x-c motif) receptor 4, Hrc - histidine rich calcium binding protein, Peli2 - pellino e3 ubiquitin protein ligase family member 2, Socs1 - suppressor of cytokine signaling 1, Ptprj - protein tyrosine phosphatase, receptor type, j, Taf7 - …	BP	DOWN
GO:0090092	regulation of transmembrane receptor protein serine/threonine kinase signaling pathway	5.08e-05	0.00193	1.56	9959	155	2546	62	[Magi2 - membrane associated guanylate kinase, ww and pdz domain containing 2, Synj2bp - synaptojanin 2 binding protein, Bcl9l - b-cell cll/lymphoma 9-like, Bambi - bmp and activin membrane-bound inhibitor, Acvrl1 - activin a receptor type ii-like 1, Gpc3 - glypican 3, Ep300 - e1a binding protein p300, Gdf10 - growth differentiation factor 10, Nrros - negative regulator of reactive oxygen species…	BP	DOWN
GO:0019221	cytokine-mediated signaling pathway	5.2e-05	0.00197	1.57	9959	152	2546	61	[Ptk2b - protein tyrosine kinase 2 beta, Cxcr4 - chemokine (c-x-c motif) receptor 4, Ghr - growth hormone receptor, Socs1 - suppressor of cytokine signaling 1, Ccrl2 - chemokine (c-c motif) receptor-like 2, Il13ra1 - interleukin 13 receptor, alpha 1, Il1rn - interleukin 1 receptor antagonist, Csf1r - colony stimulating factor 1 receptor, Cx3cl1 - chemokine (c-x3-c motif) ligand 1, Klf6 - kruppel-…	BP	DOWN
GO:0008366	axon ensheathment	5.34e-05	0.00201	1.96	9959	58	2546	29	[Dhh - desert hedgehog, Gal3st1 - galactose-3-o-sulfotransferase 1, Lgi4 - leucine-rich repeat lgi family, member 4, Tnfrsf21 - tumor necrosis factor receptor superfamily, member 21, Ntf3 - neurotrophin 3, Tspan2 - tetraspanin 2, Amigo1 - adhesion molecule with ig like domain 1, Nab1 - ngfi-a binding protein 1, Ntrk2 - neurotrophic tyrosine kinase, receptor, type 2, Cntn2 - contactin 2 (axonal), …	BP	DOWN
GO:0007272	ensheathment of neurons	5.34e-05	0.00201	1.96	9959	58	2546	29	[Dhh - desert hedgehog, Gal3st1 - galactose-3-o-sulfotransferase 1, Lgi4 - leucine-rich repeat lgi family, member 4, Tnfrsf21 - tumor necrosis factor receptor superfamily, member 21, Ntf3 - neurotrophin 3, Tspan2 - tetraspanin 2, Amigo1 - adhesion molecule with ig like domain 1, Nab1 - ngfi-a binding protein 1, Ntrk2 - neurotrophic tyrosine kinase, receptor, type 2, Cntn2 - contactin 2 (axonal), …	BP	DOWN
GO:0050921	positive regulation of chemotaxis	5.39e-05	0.00202	1.76	9959	89	2546	40	[Ptk2b - protein tyrosine kinase 2 beta, Nckap1l - nck associated protein 1 like, C5ar1 - complement component 5a receptor 1, Cd74 - cd74 molecule, major histocompatibility complex, class ii invariant chain, Hspb1 - heat shock protein 1, Ptprj - protein tyrosine phosphatase, receptor type, j, Ntf3 - neurotrophin 3, Il23a - interleukin 23, alpha subunit p19, Cxcl14 - chemokine (c-x-c motif) ligand…	BP	DOWN
GO:0060537	muscle tissue development	5.55e-05	0.00208	1.74	9959	92	2546	41	[Hlx - h2.0-like homeobox, Itga7 - integrin, alpha 7, Dmd - dystrophin, Popdc2 - popeye domain containing 2, Ep300 - e1a binding protein p300, Tiparp - tcdd-inducible poly(adp-ribose) polymerase, Svil - supervillin, Adamts9 - adam metallopeptidase with thrombospondin type 1 motif, 9, Kcnab1 - potassium voltage-gated channel, shaker-related subfamily, beta member 1, Bmp5 - bone morphogenetic prote…	BP	DOWN
GO:0007200	phospholipase C-activating G protein-coupled receptor signaling pathway	5.66e-05	0.00211	2.5	9959	25	2546	16	[Agtr1b - angiotensin ii receptor, type 1b, Plcb2 - phospholipase c, beta 2, C5ar1 - complement component 5a receptor 1, Adra2a - adrenoceptor alpha 2a, Plce1 - phospholipase c, epsilon 1, Esr1 - estrogen receptor 1, Tgm2 - transglutaminase 2, c polypeptide, Cx3cr1 - chemokine (c-x3-c motif) receptor 1, P2ry2 - purinergic receptor p2y, g-protein coupled, 2, Gna14 - guanine nucleotide binding prot…	BP	DOWN
GO:0002688	regulation of leukocyte chemotaxis	5.67e-05	0.00211	1.85	9959	72	2546	34	[Ptk2b - protein tyrosine kinase 2 beta, Nckap1l - nck associated protein 1 like, C5ar1 - complement component 5a receptor 1, Mtus1 - microtubule associated tumor suppressor 1, Dusp1 - dual specificity phosphatase 1, Cd74 - cd74 molecule, major histocompatibility complex, class ii invariant chain, Ptprj - protein tyrosine phosphatase, receptor type, j, Il23a - interleukin 23, alpha subunit p19, C…	BP	DOWN
GO:0050870	positive regulation of T cell activation	5.9e-05	0.00219	1.7	9959	101	2546	44	[Nckap1l - nck associated protein 1 like, Igf2 - insulin-like growth factor 2, Igf1 - insulin-like growth factor 1, Hlx - h2.0-like homeobox, Hes1 - hairy and enhancer of split 1 (drosophila), Prkcz - protein kinase c, zeta, Socs1 - suppressor of cytokine signaling 1, Cd74 - cd74 molecule, major histocompatibility complex, class ii invariant chain, Pnp - purine nucleoside phosphorylase, Ptprc - p…	BP	DOWN
GO:0050670	regulation of lymphocyte proliferation	5.93e-05	0.00219	1.62	9959	128	2546	53	[Pnp - purine nucleoside phosphorylase, Il13ra1 - interleukin 13 receptor, alpha 1, Coro1a - coronin, actin binding protein 1a, Il23a - interleukin 23, alpha subunit p19, Fam65b - family with sequence similarity 65, member b, Fcgr2b - fc fragment of igg, low affinity iib, receptor (cd32), Vcam1 - vascular cell adhesion molecule 1, Bcl6 - b-cell cll/lymphoma 6, Havcr2 - hepatitis a virus cellular …	BP	DOWN
GO:0045165	cell fate commitment	6.03e-05	0.00223	1.83	9959	75	2546	35	[Jag2 - jagged 2, Hes1 - hairy and enhancer of split 1 (drosophila), Irf4 - interferon regulatory factor 4, Sox13 - sry (sex determining region y)-box 13, Wnt16 - wingless-type mmtv integration site family, member 16, Ets2 - v-ets avian erythroblastosis virus e26 oncogene homolog 2, Kdr - kinase insert domain receptor, Wnt9a - wingless-type mmtv integration site family, member 9a, Sox6 - sry (sex…	BP	DOWN
GO:0001763	morphogenesis of a branching structure	6.07e-05	0.00224	1.65	9959	116	2546	49	[Gli2 - gli family zinc finger 2, Pspn - persephin, Dchs1 - dachsous 1 (drosophila), Nfatc1 - nuclear factor of activated t-cells, cytoplasmic, calcineurin-dependent 1, Rasip1 - ras interacting protein 1, Gpc3 - glypican 3, Cxcr4 - chemokine (c-x-c motif) receptor 4, Setd2 - set domain containing 2, Col4a1 - collagen, type iv, alpha 1, Sema5a - sema domain, seven thrombospondin repeats (type 1 an…	BP	DOWN
GO:0048585	negative regulation of response to stimulus	6.47e-05	0.00238	1.2	9959	1007	2546	309	[Svip - small vcp/p97-interacting protein, Dusp4 - dual specificity phosphatase 4, Sema5b - sema domain, seven thrombospondin repeats (type 1 and type 1-like), transmembrane domain (tm) and short cytoplasmic domain, (semaphorin) 5b, Rasip1 - ras interacting protein 1, Socs1 - suppressor of cytokine signaling 1, Ptprj - protein tyrosine phosphatase, receptor type, j, Ptpru - protein tyrosine phosp…	BP	DOWN
GO:0044703	multi-organism reproductive process	6.65e-05	0.00244	1.79	9959	81	2546	37	[Igf2 - insulin-like growth factor 2, Igf1 - insulin-like growth factor 1, Fosl2 - fos-like antigen 2, Nos3 - nitric oxide synthase 3, endothelial cell, Mapt - microtubule-associated protein tau, Nos1 - nitric oxide synthase 1, neuronal, Hspb1 - heat shock protein 1, Fosb - fbj osteosarcoma oncogene b, Il1rn - interleukin 1 receptor antagonist, Sts - steroid sulfatase (microsomal), isozyme s, Ddo…	BP	DOWN
GO:1904407	positive regulation of nitric oxide metabolic process	6.71e-05	0.00245	2.35	9959	30	2546	18	[Ptk2b - protein tyrosine kinase 2 beta, Pkd2 - polycystic kidney disease 2 (autosomal dominant), Itgb2 - integrin, beta 2, Insr - insulin receptor, Ddah2 - dimethylarginine dimethylaminohydrolase 2, Clu - clusterin, Ptgs2 - prostaglandin-endoperoxide synthase 2, Ass1 - argininosuccinate synthase 1, Esr1 - estrogen receptor 1, Sod2 - superoxide dismutase 2, mitochondrial, Klf4 - kruppel-like fact…	BP	DOWN
GO:0045429	positive regulation of nitric oxide biosynthetic process	6.71e-05	0.00245	2.35	9959	30	2546	18	[Ptk2b - protein tyrosine kinase 2 beta, Pkd2 - polycystic kidney disease 2 (autosomal dominant), Itgb2 - integrin, beta 2, Insr - insulin receptor, Ddah2 - dimethylarginine dimethylaminohydrolase 2, Clu - clusterin, Ptgs2 - prostaglandin-endoperoxide synthase 2, Ass1 - argininosuccinate synthase 1, Esr1 - estrogen receptor 1, Sod2 - superoxide dismutase 2, mitochondrial, Klf4 - kruppel-like fact…	BP	DOWN
GO:1900449	regulation of glutamate receptor signaling pathway	7.07e-05	0.00257	2.55	9959	23	2546	15	[Ptk2b - protein tyrosine kinase 2 beta, Cacng7 - calcium channel, voltage-dependent, gamma subunit 7, Klhl24 - kelch-like family member 24, Rasgrf2 - ras protein-specific guanine nucleotide-releasing factor 2, Pink1 - pten induced putative kinase 1, Nlgn1 - neuroligin 1, Ppargc1a - peroxisome proliferator-activated receptor gamma, coactivator 1 alpha, Nlgn3 - neuroligin 3, Frrs1l - ferric-chelat…	BP	DOWN
GO:1902624	positive regulation of neutrophil migration	7.07e-05	0.00256	2.55	9959	23	2546	15	[Nckap1l - nck associated protein 1 like, C5ar1 - complement component 5a receptor 1, Ccl21 - chemokine (c-c motif) ligand 21, Cd74 - cd74 molecule, major histocompatibility complex, class ii invariant chain, Ccl19 - chemokine (c-c motif) ligand 19, Il23a - interleukin 23, alpha subunit p19, Fam65b - family with sequence similarity 65, member b, Dapk2 - death-associated protein kinase 2, Ednra - …	BP	DOWN
GO:0045214	sarcomere organization	7.07e-05	0.00256	2.55	9959	23	2546	15	[Tpm1 - tropomyosin 1, alpha, Myom1 - myomesin 1, Mylk3 - myosin light chain kinase 3, Fhod3 - formin homology 2 domain containing 3, Synpo2l - synaptopodin 2-like, Casq1 - calsequestrin 1 (fast-twitch, skeletal muscle), Myoz1 - myozenin 1, Srf - serum response factor (c-fos serum response element-binding transcription factor), Krt8 - keratin 8, Obsl1 - obscurin-like 1, Casq2 - calsequestrin 2 (c…	BP	DOWN
GO:0090022	regulation of neutrophil chemotaxis	7.07e-05	0.00255	2.55	9959	23	2546	15	[Nckap1l - nck associated protein 1 like, C5ar1 - complement component 5a receptor 1, Ccl21 - chemokine (c-c motif) ligand 21, Cd74 - cd74 molecule, major histocompatibility complex, class ii invariant chain, Ccl19 - chemokine (c-c motif) ligand 19, Il23a - interleukin 23, alpha subunit p19, Fam65b - family with sequence similarity 65, member b, Dapk2 - death-associated protein kinase 2, Ednra - …	BP	DOWN
GO:1901699	cellular response to nitrogen compound	7.09e-05	0.00255	1.32	9959	430	2546	145	[Dnmt3a - dna (cytosine-5-)-methyltransferase 3 alpha, Nos3 - nitric oxide synthase 3, endothelial cell, Klf10 - kruppel-like factor 10, Diaph1 - diaphanous-related formin 1, Ube2b - ubiquitin-conjugating enzyme e2b, Nos1 - nitric oxide synthase 1, neuronal, Ngfr - nerve growth factor receptor, Socs1 - suppressor of cytokine signaling 1, Il1rn - interleukin 1 receptor antagonist, Akap7 - a kinase…	BP	DOWN
GO:0099622	cardiac muscle cell membrane repolarization	7.09e-05	0.00255	3.91	9959	7	2546	7	[Kcnh2 - potassium voltage-gated channel, subfamily h (eag-related), member 2, Kcne4 - potassium voltage-gated channel, isk-related family, member 4, Kcnj8 - potassium inwardly-rectifying channel, subfamily j, member 8, Kcne1 - potassium voltage-gated channel, isk-related family, member 1, Kcna5 - potassium voltage-gated channel, shaker-related subfamily, member 5, Kcnq1 - potassium voltage-gated…	BP	DOWN
GO:0086013	membrane repolarization during cardiac muscle cell action potential	7.09e-05	0.00254	3.91	9959	7	2546	7	[Kcnh2 - potassium voltage-gated channel, subfamily h (eag-related), member 2, Kcne4 - potassium voltage-gated channel, isk-related family, member 4, Kcnj8 - potassium inwardly-rectifying channel, subfamily j, member 8, Kcne1 - potassium voltage-gated channel, isk-related family, member 1, Kcna5 - potassium voltage-gated channel, shaker-related subfamily, member 5, Kcnq1 - potassium voltage-gated…	BP	DOWN
GO:0086011	membrane repolarization during action potential	7.09e-05	0.00253	3.91	9959	7	2546	7	[Kcnh2 - potassium voltage-gated channel, subfamily h (eag-related), member 2, Kcne4 - potassium voltage-gated channel, isk-related family, member 4, Kcnj8 - potassium inwardly-rectifying channel, subfamily j, member 8, Kcne1 - potassium voltage-gated channel, isk-related family, member 1, Kcna5 - potassium voltage-gated channel, shaker-related subfamily, member 5, Kcnq1 - potassium voltage-gated…	BP	DOWN
GO:0031652	positive regulation of heat generation	7.09e-05	0.00253	3.91	9959	7	2546	7	[Slc27a1 - solute carrier family 27 (fatty acid transporter), member 1, Ccr5 - chemokine (c-c motif) receptor 5, Ptger3 - prostaglandin e receptor 3 (subtype ep3), Tnf - tumor necrosis factor, Ptgs2 - prostaglandin-endoperoxide synthase 2, Pla2g4a - phospholipase a2, group iva (cytosolic, calcium-dependent), Il1b - interleukin 1 beta]	BP	DOWN
GO:1903531	negative regulation of secretion by cell	7.83e-05	0.00278	1.63	9959	120	2546	50	[Nos1 - nitric oxide synthase 1, neuronal, Rsad2 - radical s-adenosyl methionine domain containing 2, Il1rn - interleukin 1 receptor antagonist, Fbln1 - fibulin 1, Cx3cl1 - chemokine (c-x3-c motif) ligand 1, Syt11 - synaptotagmin xi, Agtr2 - angiotensin ii receptor, type 2, Adtrp - androgen-dependent tfpi-regulating protein, Cry2 - cryptochrome 2 (photolyase-like), Trim9 - tripartite motif-contai…	BP	DOWN
GO:0050867	positive regulation of cell activation	7.9e-05	0.0028	1.51	9959	179	2546	69	[Hlx - h2.0-like homeobox, Prkcz - protein kinase c, zeta, Socs1 - suppressor of cytokine signaling 1, Pnp - purine nucleoside phosphorylase, Ptprj - protein tyrosine phosphatase, receptor type, j, Il13ra1 - interleukin 13 receptor, alpha 1, Coro1a - coronin, actin binding protein 1a, Il23a - interleukin 23, alpha subunit p19, Efnb3 - ephrin b3, Atp11c - atpase, class vi, type 11c, Cd83 - cd83 mo…	BP	DOWN
GO:0050866	negative regulation of cell activation	7.92e-05	0.0028	1.65	9959	114	2546	48	[Tnfaip8l2 - tumor necrosis factor, alpha-induced protein 8-like 2, Hlx - h2.0-like homeobox, Peli1 - pellino e3 ubiquitin protein ligase 1, Kng1 - kininogen 1, Alox12 - arachidonate 12-lipoxygenase, Socs1 - suppressor of cytokine signaling 1, Cd74 - cd74 molecule, major histocompatibility complex, class ii invariant chain, Tnfrsf21 - tumor necrosis factor receptor superfamily, member 21, Lag3 - …	BP	DOWN
GO:0051051	negative regulation of transport	7.92e-05	0.00279	1.37	9959	326	2546	114	[Svip - small vcp/p97-interacting protein, Plcb4 - phospholipase c, beta 4, Nos3 - nitric oxide synthase 3, endothelial cell, Hrc - histidine rich calcium binding protein, Nos1 - nitric oxide synthase 1, neuronal, Il1rn - interleukin 1 receptor antagonist, Coro1a - coronin, actin binding protein 1a, Fcgr2b - fc fragment of igg, low affinity iib, receptor (cd32), Hecw2 - hect, c2 and ww domain con…	BP	DOWN
GO:1903039	positive regulation of leukocyte cell-cell adhesion	7.93e-05	0.00279	1.66	9959	111	2546	47	[Nckap1l - nck associated protein 1 like, Igf2 - insulin-like growth factor 2, Igf1 - insulin-like growth factor 1, Hlx - h2.0-like homeobox, Hes1 - hairy and enhancer of split 1 (drosophila), Prkcz - protein kinase c, zeta, Socs1 - suppressor of cytokine signaling 1, Cd74 - cd74 molecule, major histocompatibility complex, class ii invariant chain, Pnp - purine nucleoside phosphorylase, Ptprc - p…	BP	DOWN
GO:0002690	positive regulation of leukocyte chemotaxis	7.96e-05	0.00279	1.92	9959	59	2546	29	[Ptk2b - protein tyrosine kinase 2 beta, Nckap1l - nck associated protein 1 like, C5ar1 - complement component 5a receptor 1, Cd74 - cd74 molecule, major histocompatibility complex, class ii invariant chain, Ptprj - protein tyrosine phosphatase, receptor type, j, Il23a - interleukin 23, alpha subunit p19, Cxcl14 - chemokine (c-x-c motif) ligand 14, Fam65b - family with sequence similarity 65, mem…	BP	DOWN
GO:0043267	negative regulation of potassium ion transport	8.7e-05	0.00304	2.37	9959	28	2546	17	[Rgs4 - regulator of g-protein signaling 4, Ptk2b - protein tyrosine kinase 2 beta, Agrn - agrin, Kcnh2 - potassium voltage-gated channel, subfamily h (eag-related), member 2, Plcb4 - phospholipase c, beta 4, Nos3 - nitric oxide synthase 3, endothelial cell, Nos1 - nitric oxide synthase 1, neuronal, Kcnab1 - potassium voltage-gated channel, shaker-related subfamily, beta member 1, Kcnq1 - potassi…	BP	DOWN
GO:0010880	regulation of release of sequestered calcium ion into cytosol by sarcoplasmic reticulum	8.71e-05	0.00304	2.61	9959	21	2546	14	[Dhrs7c - dehydrogenase/reductase (sdr family) member 7c, Dmd - dystrophin, Ank2 - ankyrin 2, neuronal, Hrc - histidine rich calcium binding protein, Ryr2 - ryanodine receptor 2, cardiac, Chd7 - chromodomain helicase dna binding protein 7, Trdn - triadin, Casq1 - calsequestrin 1 (fast-twitch, skeletal muscle), Akap6 - a kinase (prka) anchor protein 6, Gstm7 - glutathione s-transferase, mu 7, Cacn…	BP	DOWN
GO:2000401	regulation of lymphocyte migration	9.01e-05	0.00314	2.16	9959	38	2546	21	[Ptk2b - protein tyrosine kinase 2 beta, Stk10 - serine/threonine kinase 10, Ccl4 - chemokine (c-c motif) ligand 4, Ccl21 - chemokine (c-c motif) ligand 21, Ccl2 - chemokine (c-c motif) ligand 2, Ccl27 - chemokine (c-c motif) ligand 27, Dock8 - dedicator of cytokinesis 8, Cxcl14 - chemokine (c-x-c motif) ligand 14, Fam65b - family with sequence similarity 65, member b, Oxsr1 - oxidative-stress re…	BP	DOWN
GO:1903428	positive regulation of reactive oxygen species biosynthetic process	9.01e-05	0.00313	2.16	9959	38	2546	21	[Ptk2b - protein tyrosine kinase 2 beta, Bai1 - brain-specific angiogenesis inhibitor 1, Zfp13 - zinc finger protein 13, Ddah2 - dimethylarginine dimethylaminohydrolase 2, Insr - insulin receptor, Itgb2 - integrin, beta 2, Foxo3 - forkhead box o3, Pkd2 - polycystic kidney disease 2 (autosomal dominant), Clu - clusterin, Ptgs2 - prostaglandin-endoperoxide synthase 2, Ass1 - argininosuccinate synth…	BP	DOWN
GO:0051965	positive regulation of synapse assembly	9.25e-05	0.0032	2.25	9959	33	2546	19	[Bai1 - brain-specific angiogenesis inhibitor 1, Ntrk3 - neurotrophic tyrosine kinase, receptor, type 3, Agrn - agrin, Cbln2 - cerebellin 2 precursor, Thbs2 - thrombospondin 2, Nlgn1 - neuroligin 1, Lrrc4b - leucine rich repeat containing 4b, Lrrn3 - leucine rich repeat neuronal 3, Amigo1 - adhesion molecule with ig like domain 1, Nlgn3 - neuroligin 3, Ntrk2 - neurotrophic tyrosine kinase, recept…	BP	DOWN
GO:0002683	negative regulation of immune system process	9.49e-05	0.00328	1.4	9959	274	2546	98	[Socs1 - suppressor of cytokine signaling 1, Ptprj - protein tyrosine phosphatase, receptor type, j, Lag3 - lymphocyte-activation gene 3, Nr1d1 - nuclear receptor subfamily 1, group d, member 1, Fcgr2b - fc fragment of igg, low affinity iib, receptor (cd32), Bcl6 - b-cell cll/lymphoma 6, Adora2a - adenosine a2a receptor, Fstl3 - follistatin-like 3 (secreted glycoprotein), Il17d - interleukin 17d,…	BP	DOWN
GO:0032944	regulation of mononuclear cell proliferation	9.67e-05	0.00334	1.59	9959	130	2546	53	[Pnp - purine nucleoside phosphorylase, Il13ra1 - interleukin 13 receptor, alpha 1, Coro1a - coronin, actin binding protein 1a, Il23a - interleukin 23, alpha subunit p19, Fam65b - family with sequence similarity 65, member b, Fcgr2b - fc fragment of igg, low affinity iib, receptor (cd32), Vcam1 - vascular cell adhesion molecule 1, Bcl6 - b-cell cll/lymphoma 6, Havcr2 - hepatitis a virus cellular …	BP	DOWN
GO:0070374	positive regulation of ERK1 and ERK2 cascade	9.82e-05	0.00338	1.6	9959	127	2546	52	[Ptk2b - protein tyrosine kinase 2 beta, C5ar1 - complement component 5a receptor 1, Prkcz - protein kinase c, zeta, Csf1r - colony stimulating factor 1 receptor, Cx3cl1 - chemokine (c-x3-c motif) ligand 1, Dstyk - dual serine/threonine and tyrosine protein kinase, Itgb3 - integrin, beta 3, Src - v-src avian sarcoma (schmidt-ruppin a-2) viral oncogene homolog, Havcr2 - hepatitis a virus cellular …	BP	DOWN
GO:0050776	regulation of immune response	0.0001	0.00343	1.33	9959	385	2546	131	[Arid5a - at rich interactive domain 5a (mrf1 like), C5ar1 - complement component 5a receptor 1, C1s - complement component 1, s subcomponent, Blk - b lymphoid tyrosine kinase, Socs1 - suppressor of cytokine signaling 1, Ptprj - protein tyrosine phosphatase, receptor type, j, Lag3 - lymphocyte-activation gene 3, Il23a - interleukin 23, alpha subunit p19, Cfh - complement factor h, Tifa - traf-int…	BP	DOWN
GO:1903034	regulation of response to wounding	0.000104	0.00355	1.66	9959	106	2546	45	[Xylt1 - xylosyltransferase 1, Kank1 - kn motif and ankyrin repeat domains 1, Hopx - hop homeobox, Cxcr4 - chemokine (c-x-c motif) receptor 4, Kng1 - kininogen 1, Cd34 - cd34 molecule, Alox12 - arachidonate 12-lipoxygenase, Neo1 - neogenin 1, P2rx5 - purinergic receptor p2x, ligand-gated ion channel, 5, Ptprj - protein tyrosine phosphatase, receptor type, j, Serping1 - serpin peptidase inhibitor,…	BP	DOWN
GO:0099623	regulation of cardiac muscle cell membrane repolarization	0.000105	0.0036	2.68	9959	19	2546	13	[Kcnh2 - potassium voltage-gated channel, subfamily h (eag-related), member 2, Scn1b - sodium channel, voltage-gated, type i, beta, Ank2 - ankyrin 2, neuronal, Rnf207 - ring finger protein 207, Kcnq1 - potassium voltage-gated channel, kqt-like subfamily, member 1, Flna - filamin a, alpha, Kcne4 - potassium voltage-gated channel, isk-related family, member 4, Gja5 - gap junction protein, alpha 5, …	BP	DOWN
GO:0061900	glial cell activation	0.000105	0.00359	2.68	9959	19	2546	13	[Clu - clusterin, Jun - jun proto-oncogene, Cx3cr1 - chemokine (c-x3-c motif) receptor 1, Egfr - epidermal growth factor receptor, Cx3cl1 - chemokine (c-x3-c motif) ligand 1, Trpv1 - transient receptor potential cation channel, subfamily v, member 1, Tlr8 - toll-like receptor 8, Tlr2 - toll-like receptor 2, Bace2 - beta-site app-cleaving enzyme 2, Tlr3 - toll-like receptor 3, Adora2a - adenosine …	BP	DOWN
GO:0009582	detection of abiotic stimulus	0.000111	0.00377	2.1	9959	41	2546	22	[Igf1 - insulin-like growth factor 1, Sema5b - sema domain, seven thrombospondin repeats (type 1 and type 1-like), transmembrane domain (tm) and short cytoplasmic domain, (semaphorin) 5b, Pkd2 - polycystic kidney disease 2 (autosomal dominant), Plcb4 - phospholipase c, beta 4, Cxcr4 - chemokine (c-x-c motif) receptor 4, Ngfr - nerve growth factor receptor, Serpine2 - serpin peptidase inhibitor, c…	BP	DOWN
GO:0009581	detection of external stimulus	0.000111	0.00376	2.1	9959	41	2546	22	[Igf1 - insulin-like growth factor 1, Sema5b - sema domain, seven thrombospondin repeats (type 1 and type 1-like), transmembrane domain (tm) and short cytoplasmic domain, (semaphorin) 5b, Pkd2 - polycystic kidney disease 2 (autosomal dominant), Plcb4 - phospholipase c, beta 4, Cxcr4 - chemokine (c-x-c motif) receptor 4, Ngfr - nerve growth factor receptor, Serpine2 - serpin peptidase inhibitor, c…	BP	DOWN
GO:0050671	positive regulation of lymphocyte proliferation	0.000112	0.0038	1.8	9959	74	2546	34	[Igf2 - insulin-like growth factor 2, Nckap1l - nck associated protein 1 like, Igf1 - insulin-like growth factor 1, Hes1 - hairy and enhancer of split 1 (drosophila), Peli1 - pellino e3 ubiquitin protein ligase 1, Pnp - purine nucleoside phosphorylase, Cd74 - cd74 molecule, major histocompatibility complex, class ii invariant chain, Il13ra1 - interleukin 13 receptor, alpha 1, Ptprc - protein tyro…	BP	DOWN
GO:0046928	regulation of neurotransmitter secretion	0.000112	0.00379	1.8	9959	74	2546	34	[Prkcg - protein kinase c, gamma, Pnkd - paroxysmal nonkinesigenic dyskinesia, Nr3c2 - nuclear receptor subfamily 3, group c, member 2, Ppp1r9a - protein phosphatase 1, regulatory subunit 9a, Vamp1 - vesicle-associated membrane protein 1, Ntrk2 - neurotrophic tyrosine kinase, receptor, type 2, P2ry2 - purinergic receptor p2y, g-protein coupled, 2, Grik5 - glutamate receptor, ionotropic, kainate 5…	BP	DOWN
GO:0010927	cellular component assembly involved in morphogenesis	0.000114	0.00383	2	9959	49	2546	25	[Mylk3 - myosin light chain kinase 3, Tmod4 - tropomodulin 4, Fhod3 - formin homology 2 domain containing 3, Srf - serum response factor (c-fos serum response element-binding transcription factor), Tlr2 - toll-like receptor 2, Obsl1 - obscurin-like 1, Tmod2 - tropomodulin 2, Myom3 - myomesin 3, Tmod1 - tropomodulin 1, Rfx2 - regulatory factor x, 2 (influences hla class ii expression), Chn2 - chim…	BP	DOWN
GO:0002768	immune response-regulating cell surface receptor signaling pathway	0.000117	0.00394	1.78	9959	77	2546	35	[Nckap1l - nck associated protein 1 like, Gpld1 - glycosylphosphatidylinositol specific phospholipase d1, Themis2 - thymocyte selection associated family member 2, C5ar1 - complement component 5a receptor 1, Blk - b lymphoid tyrosine kinase, Ptprc - protein tyrosine phosphatase, receptor type, c, Klhl6 - kelch-like family member 6, Tnfrsf21 - tumor necrosis factor receptor superfamily, member 21,…	BP	DOWN
GO:0051283	negative regulation of sequestering of calcium ion	0.00012	0.00402	2.17	9959	36	2546	20	[Jph2 - junctophilin 2, Jph3 - junctophilin 3, Plcb2 - phospholipase c, beta 2, Pkd2 - polycystic kidney disease 2 (autosomal dominant), Mcoln3 - mucolipin 3, Ccl21 - chemokine (c-c motif) ligand 21, Ryr2 - ryanodine receptor 2, cardiac, Plce1 - phospholipase c, epsilon 1, Ccl19 - chemokine (c-c motif) ligand 19, Ryr3 - ryanodine receptor 3, Ptprc - protein tyrosine phosphatase, receptor type, c,…	BP	DOWN
GO:0061041	regulation of wound healing	0.000121	0.00406	1.76	9959	80	2546	36	[Hopx - hop homeobox, Kank1 - kn motif and ankyrin repeat domains 1, Cxcr4 - chemokine (c-x-c motif) receptor 4, Alox12 - arachidonate 12-lipoxygenase, Cd34 - cd34 molecule, Kng1 - kininogen 1, Ptprj - protein tyrosine phosphatase, receptor type, j, P2rx5 - purinergic receptor p2x, ligand-gated ion channel, 5, Serping1 - serpin peptidase inhibitor, clade g (c1 inhibitor), member 1, Myoz1 - myozen…	BP	DOWN
GO:0032870	cellular response to hormone stimulus	0.000122	0.00406	1.36	9959	329	2546	114	[Trim63 - tripartite motif containing 63, e3 ubiquitin protein ligase, Nos3 - nitric oxide synthase 3, endothelial cell, Ddit4 - dna-damage-inducible transcript 4, Ube2b - ubiquitin-conjugating enzyme e2b, Apobec1 - apolipoprotein b mrna editing enzyme, catalytic polypeptide 1, Agtr2 - angiotensin ii receptor, type 2, Glp1r - glucagon-like peptide 1 receptor, Itgb3 - integrin, beta 3, Fam210b - f…	BP	DOWN
GO:0010721	negative regulation of cell development	0.000129	0.0043	1.42	9959	243	2546	88	[Rgs4 - regulator of g-protein signaling 4, Cdk5r1 - cyclin-dependent kinase 5, regulatory subunit 1 (p35), Fgf13 - fibroblast growth factor 13, Xylt1 - xylosyltransferase 1, Sema6d - sema domain, transmembrane domain (tm), and cytoplasmic domain, (semaphorin) 6d, Sema5b - sema domain, seven thrombospondin repeats (type 1 and type 1-like), transmembrane domain (tm) and short cytoplasmic domain, (…	BP	DOWN
GO:0071216	cellular response to biotic stimulus	0.000129	0.00429	1.53	9959	153	2546	60	[Vwf - von willebrand factor, Arid5a - at rich interactive domain 5a (mrf1 like), Il1rn - interleukin 1 receptor antagonist, Cfh - complement factor h, Nr1d1 - nuclear receptor subfamily 1, group d, member 1, Fcgr2b - fc fragment of igg, low affinity iib, receptor (cd32), Stap1 - signal transducing adaptor family member 1, Src - v-src avian sarcoma (schmidt-ruppin a-2) viral oncogene homolog, Irf…	BP	DOWN
GO:0051592	response to calcium ion	0.000134	0.00443	1.69	9959	95	2546	41	[Ptk2b - protein tyrosine kinase 2 beta, Gpld1 - glycosylphosphatidylinositol specific phospholipase d1, Ep300 - e1a binding protein p300, Asph - aspartate-beta-hydroxylase, Dusp1 - dual specificity phosphatase 1, Fosb - fbj osteosarcoma oncogene b, Penk - proenkephalin, Apobec1 - apolipoprotein b mrna editing enzyme, catalytic polypeptide 1, Cpne5 - copine v, Kcnmb1 - potassium large conductance…	BP	DOWN
GO:0097485	neuron projection guidance	0.000134	0.00442	1.69	9959	95	2546	41	[B3gnt2 - udp-glcnac:betagal beta-1,3-n-acetylglucosaminyltransferase 2, Cdk5r1 - cyclin-dependent kinase 5, regulatory subunit 1 (p35), Gli2 - gli family zinc finger 2, Plxna4a - plexin a4, a, Sema5b - sema domain, seven thrombospondin repeats (type 1 and type 1-like), transmembrane domain (tm) and short cytoplasmic domain, (semaphorin) 5b, Apbb1 - amyloid beta (a4) precursor protein-binding, fa…	BP	DOWN
GO:0007626	locomotory behavior	0.000134	0.00443	1.64	9959	110	2546	46	[Slc22a5 - solute carrier family 22 (organic cation/carnitine transporter), member 5, Oxr1 - oxidation resistance 1, Nr4a2 - nuclear receptor subfamily 4, group a, member 2, Adcy5 - adenylate cyclase 5, Mapt - microtubule-associated protein tau, Usp2 - ubiquitin specific peptidase 2, Chd7 - chromodomain helicase dna binding protein 7, Ppt1 - palmitoyl-protein thioesterase 1, Gnao1 - guanine nucle…	BP	DOWN
GO:0051953	negative regulation of amine transport	0.000142	0.00466	2.87	9959	15	2546	11	[Rgs4 - regulator of g-protein signaling 4, Agtr2 - angiotensin ii receptor, type 2, P2ry12 - purinergic receptor p2y, g-protein coupled, 12, Tnf - tumor necrosis factor, Ptger3 - prostaglandin e receptor 3 (subtype ep3), Il1b - interleukin 1 beta, Crhr2 - corticotropin releasing hormone receptor 2, Rgs2 - regulator of g-protein signaling 2, Stk39 - serine threonine kinase 39, Entpd1 - ectonucleo…	BP	DOWN
GO:0033630	positive regulation of cell adhesion mediated by integrin	0.000142	0.00465	2.87	9959	15	2546	11	[Nckap1l - nck associated protein 1 like, Fermt1 - fermitin family member 1, Sfrp2 - secreted frizzled-related protein 2, Ccl21 - chemokine (c-c motif) ligand 21, P2ry12 - purinergic receptor p2y, g-protein coupled, 12, Rac3 - ras-related c3 botulinum toxin substrate 3 (rho family, small gtp binding protein rac3), Itgb3 - integrin, beta 3, Foxc2 - forkhead box c2, Podxl - podocalyxin-like, Adam9 …	BP	DOWN
GO:0042552	myelination	0.000143	0.00468	1.92	9959	55	2546	27	[Dhh - desert hedgehog, Gal3st1 - galactose-3-o-sulfotransferase 1, Lgi4 - leucine-rich repeat lgi family, member 4, Tnfrsf21 - tumor necrosis factor receptor superfamily, member 21, Ntf3 - neurotrophin 3, Tspan2 - tetraspanin 2, Amigo1 - adhesion molecule with ig like domain 1, Nab1 - ngfi-a binding protein 1, Ntrk2 - neurotrophic tyrosine kinase, receptor, type 2, Cntn2 - contactin 2 (axonal), …	BP	DOWN
GO:1900047	negative regulation of hemostasis	0.000144	0.0047	2.44	9959	24	2546	15	[Comp - cartilage oligomeric matrix protein, Kng1 - kininogen 1, Cd34 - cd34 molecule, Alox12 - arachidonate 12-lipoxygenase, Serpine2 - serpin peptidase inhibitor, clade e (nexin, plasminogen activator inhibitor type 1), member 2, Cd9 - cd9 molecule, Serping1 - serpin peptidase inhibitor, clade g (c1 inhibitor), member 1, Apoe - apolipoprotein e, Plg - plasminogen, Ptger3 - prostaglandin e recep…	BP	DOWN
GO:0050433	regulation of catecholamine secretion	0.000144	0.00469	2.44	9959	24	2546	15	[Htr1b - 5-hydroxytryptamine (serotonin) receptor 1b, g protein-coupled, Sdhd - succinate dehydrogenase complex, subunit d, integral membrane protein, Kcnb1 - potassium voltage gated channel, shab-related subfamily, member 1, Pink1 - pten induced putative kinase 1, Syt11 - synaptotagmin xi, Agtr2 - angiotensin ii receptor, type 2, P2ry12 - purinergic receptor p2y, g-protein coupled, 12, Ptger3 - …	BP	DOWN
GO:0032653	regulation of interleukin-10 production	0.000144	0.00468	2.44	9959	24	2546	15	[Irf4 - interferon regulatory factor 4, Prkcz - protein kinase c, zeta, Cd34 - cd34 molecule, Tnfrsf9 - tumor necrosis factor receptor superfamily, member 9, Tnfrsf21 - tumor necrosis factor receptor superfamily, member 21, Il23a - interleukin 23, alpha subunit p19, Cd274 - cd274 molecule, Fcgr2b - fc fragment of igg, low affinity iib, receptor (cd32), Cd83 - cd83 molecule, Hgf - hepatocyte growt…	BP	DOWN
GO:0031349	positive regulation of defense response	0.000145	0.00471	1.51	9959	163	2546	63	[Ctss - cathepsin s, Lag3 - lymphocyte-activation gene 3, Rsad2 - radical s-adenosyl methionine domain containing 2, Tgm2 - transglutaminase 2, c polypeptide, Tifa - traf-interacting protein with forkhead-associated domain, Cx3cl1 - chemokine (c-x3-c motif) ligand 1, Pik3cg - phosphatidylinositol-4,5-bisphosphate 3-kinase, catalytic subunit gamma, Stap1 - signal transducing adaptor family member …	BP	DOWN
GO:0048646	anatomical structure formation involved in morphogenesis	0.000148	0.00479	1.29	9959	467	2546	154	[Cdk5r1 - cyclin-dependent kinase 5, regulatory subunit 1 (p35), Gli2 - gli family zinc finger 2, Apold1 - apolipoprotein l domain containing 1, Epb4.1l5 - erythrocyte membrane protein band 4.1 like 5, Rasip1 - ras interacting protein 1, Nos3 - nitric oxide synthase 3, endothelial cell, Tmod4 - tropomodulin 4, Gpr4 - g protein-coupled receptor 4, Tgm2 - transglutaminase 2, c polypeptide, Bcl6 - b…	BP	DOWN
GO:0010882	regulation of cardiac muscle contraction by calcium ion signaling	0.000151	0.00487	3.2	9959	11	2546	9	[Dmd - dystrophin, Ank2 - ankyrin 2, neuronal, Ryr2 - ryanodine receptor 2, cardiac, Cacna1c - calcium channel, voltage-dependent, l type, alpha 1c subunit, Atp2a2 - atpase, ca++ transporting, cardiac muscle, slow twitch 2, Atp1b1 - atpase, na+/k+ transporting, beta 1 polypeptide, Casq2 - calsequestrin 2 (cardiac muscle), Atp1a2 - atpase, na+/k+ transporting, alpha 2 polypeptide, Pln - phospholam…	BP	DOWN
GO:0006958	complement activation, classical pathway	0.000151	0.00486	3.2	9959	11	2546	9	[Serping1 - serpin peptidase inhibitor, clade g (c1 inhibitor), member 1, C1r - complement component 1, r subcomponent, C1qb - complement component 1, q subcomponent, b chain, C4a - complement component 4a (rodgers blood group), C3 - complement component 3, C1s - complement component 1, s subcomponent, C4bpa - complement component 4 binding protein, alpha, C1qa - complement component 1, q subcomp…	BP	DOWN
GO:1904018	positive regulation of vasculature development	0.000151	0.00486	1.56	9959	135	2546	54	[Aqp1 - aquaporin 1, Ptk2b - protein tyrosine kinase 2 beta, Ptgis - prostaglandin i2 (prostacyclin) synthase, Acvrl1 - activin a receptor type ii-like 1, Nos3 - nitric oxide synthase 3, endothelial cell, C5ar1 - complement component 5a receptor 1, Cxcr4 - chemokine (c-x-c motif) receptor 4, Sema5a - sema domain, seven thrombospondin repeats (type 1 and type 1-like), transmembrane domain (tm) and…	BP	DOWN
GO:1901018	positive regulation of potassium ion transmembrane transporter activity	0.000153	0.0049	3.01	9959	13	2546	10	[Ank2 - ankyrin 2, neuronal, Akap6 - a kinase (prka) anchor protein 6, Kcne1 - potassium voltage-gated channel, isk-related family, member 1, Abcc8 - atp-binding cassette, subfamily c (cftr/mrp), member 8, Atp1b1 - atpase, na+/k+ transporting, beta 1 polypeptide, Atp1b2 - atpase, na+/k+ transporting, beta 2 polypeptide, Lrrc38 - leucine rich repeat containing 38, Rnf207 - ring finger protein 207,…	BP	DOWN
GO:1901652	response to peptide	0.000156	0.00498	1.33	9959	368	2546	125	[Nos3 - nitric oxide synthase 3, endothelial cell, Klf10 - kruppel-like factor 10, Nos1 - nitric oxide synthase 1, neuronal, Ube2b - ubiquitin-conjugating enzyme e2b, Ngfr - nerve growth factor receptor, Socs1 - suppressor of cytokine signaling 1, Apobec1 - apolipoprotein b mrna editing enzyme, catalytic polypeptide 1, Fcgr2b - fc fragment of igg, low affinity iib, receptor (cd32), Glp1r - glucag…	BP	DOWN
GO:0046634	regulation of alpha-beta T cell activation	0.000156	0.00499	1.89	9959	58	2546	28	[Nckap1l - nck associated protein 1 like, Hlx - h2.0-like homeobox, Prkcz - protein kinase c, zeta, Pnp - purine nucleoside phosphorylase, Socs1 - suppressor of cytokine signaling 1, Ptprc - protein tyrosine phosphatase, receptor type, c, Il23a - interleukin 23, alpha subunit p19, Cd83 - cd83 molecule, Irf1 - interferon regulatory factor 1, Bcl6 - b-cell cll/lymphoma 6, Il6r - interleukin 6 recep…	BP	DOWN
GO:0010648	negative regulation of cell communication	0.000159	0.00505	1.21	9959	838	2546	259	[Dusp4 - dual specificity phosphatase 4, Rasip1 - ras interacting protein 1, Kcnq4 - potassium voltage-gated channel, kqt-like subfamily, member 4, Socs1 - suppressor of cytokine signaling 1, Ptprj - protein tyrosine phosphatase, receptor type, j, Ptpru - protein tyrosine phosphatase, receptor type, u, Nrros - negative regulator of reactive oxygen species, Il1rn - interleukin 1 receptor antagonis…	BP	DOWN
GO:0045823	positive regulation of heart contraction	0.00016	0.00509	2.29	9959	29	2546	17	[Rgs4 - regulator of g-protein signaling 4, Gch1 - gtp cyclohydrolase 1, Tpm1 - tropomyosin 1, alpha, Scn3b - sodium channel, voltage-gated, type iii, beta, Cacna1h - calcium channel, voltage-dependent, t type, alpha 1h subunit, Hrc - histidine rich calcium binding protein, Ryr2 - ryanodine receptor 2, cardiac, Rnf207 - ring finger protein 207, Kcnq1 - potassium voltage-gated channel, kqt-like su…	BP	DOWN
GO:0070482	response to oxygen levels	0.000163	0.00517	1.35	9959	321	2546	111	[Apold1 - apolipoprotein l domain containing 1, Dnmt3a - dna (cytosine-5-)-methyltransferase 3 alpha, Nos3 - nitric oxide synthase 3, endothelial cell, Cxcr4 - chemokine (c-x-c motif) receptor 4, Ube2b - ubiquitin-conjugating enzyme e2b, Nos1 - nitric oxide synthase 1, neuronal, Ddit4 - dna-damage-inducible transcript 4, Egln3 - egl nine homolog 3 (c. elegans), Vcam1 - vascular cell adhesion mole…	BP	DOWN
GO:0050778	positive regulation of immune response	0.000167	0.00527	1.39	9959	271	2546	96	[Hlx - h2.0-like homeobox, Arid5a - at rich interactive domain 5a (mrf1 like), C5ar1 - complement component 5a receptor 1, Prkcz - protein kinase c, zeta, C1s - complement component 1, s subcomponent, Blk - b lymphoid tyrosine kinase, Ptprj - protein tyrosine phosphatase, receptor type, j, Lag3 - lymphocyte-activation gene 3, Rsad2 - radical s-adenosyl methionine domain containing 2, Il23a - inte…	BP	DOWN
GO:0002687	positive regulation of leukocyte migration	0.000172	0.00543	1.71	9959	87	2546	38	[Ptk2b - protein tyrosine kinase 2 beta, Nckap1l - nck associated protein 1 like, C5ar1 - complement component 5a receptor 1, Cd74 - cd74 molecule, major histocompatibility complex, class ii invariant chain, Ptprj - protein tyrosine phosphatase, receptor type, j, Il23a - interleukin 23, alpha subunit p19, Cxcl14 - chemokine (c-x-c motif) ligand 14, Fam65b - family with sequence similarity 65, mem…	BP	DOWN
GO:0023057	negative regulation of signaling	0.000173	0.00544	1.21	9959	839	2546	259	[Dusp4 - dual specificity phosphatase 4, Rasip1 - ras interacting protein 1, Kcnq4 - potassium voltage-gated channel, kqt-like subfamily, member 4, Socs1 - suppressor of cytokine signaling 1, Ptprj - protein tyrosine phosphatase, receptor type, j, Ptpru - protein tyrosine phosphatase, receptor type, u, Nrros - negative regulator of reactive oxygen species, Il1rn - interleukin 1 receptor antagonis…	BP	DOWN
GO:0098916	anterograde trans-synaptic signaling	0.000174	0.00547	1.7	9959	90	2546	39	[Synj2bp - synaptojanin 2 binding protein, Agrn - agrin, Camk2n1 - calcium/calmodulin-dependent protein kinase ii inhibitor 1, Cacna1g - calcium channel, voltage-dependent, t type, alpha 1g subunit, Prkcg - protein kinase c, gamma, Ntf3 - neurotrophin 3, Sv2c - synaptic vesicle glycoprotein 2c, Cav2 - caveolin 2, Penk - proenkephalin, Rasd2 - rasd family, member 2, Dlg3 - discs, large homolog 3 (…	BP	DOWN
GO:0007268	chemical synaptic transmission	0.000174	0.00546	1.7	9959	90	2546	39	[Synj2bp - synaptojanin 2 binding protein, Agrn - agrin, Camk2n1 - calcium/calmodulin-dependent protein kinase ii inhibitor 1, Prkcg - protein kinase c, gamma, Cacna1g - calcium channel, voltage-dependent, t type, alpha 1g subunit, Ntf3 - neurotrophin 3, Sv2c - synaptic vesicle glycoprotein 2c, Cav2 - caveolin 2, Penk - proenkephalin, Rasd2 - rasd family, member 2, Dlg3 - discs, large homolog 3 (…	BP	DOWN
GO:0070663	regulation of leukocyte proliferation	0.000189	0.00592	1.55	9959	136	2546	54	[Pnp - purine nucleoside phosphorylase, Il13ra1 - interleukin 13 receptor, alpha 1, Coro1a - coronin, actin binding protein 1a, Il23a - interleukin 23, alpha subunit p19, Fam65b - family with sequence similarity 65, member b, Fcgr2b - fc fragment of igg, low affinity iib, receptor (cd32), Vcam1 - vascular cell adhesion molecule 1, Bcl6 - b-cell cll/lymphoma 6, Havcr2 - hepatitis a virus cellular …	BP	DOWN
GO:0003014	renal system process	0.000192	0.00599	1.92	9959	53	2546	26	[Magi2 - membrane associated guanylate kinase, ww and pdz domain containing 2, Aqp1 - aquaporin 1, Agtr1b - angiotensin ii receptor, type 1b, Btc - betacellulin, Cd34 - cd34 molecule, Adra1d - adrenoceptor alpha 1d, Ptpro - protein tyrosine phosphatase, receptor type, o, Mllt6 - myeloid/lymphoid or mixed-lineage leukemia (trithorax homolog, drosophila); translocated to, 6, Agtr2 - angiotensin ii …	BP	DOWN
GO:0035914	skeletal muscle cell differentiation	0.000199	0.00618	2.11	9959	37	2546	20	[Mylk2 - myosin light chain kinase 2, Bcl9l - b-cell cll/lymphoma 9-like, Sox8 - sry (sex determining region y)-box 8, Egr2 - early growth response 2, Btg2 - btg family, member 2, Ngfr - nerve growth factor receptor, Fos - fbj osteosarcoma oncogene, Atf3 - activating transcription factor 3, Egr1 - early growth response 1, Heyl - hairy/enhancer-of-split related with yrpw motif-like, Nupr1 - nuclea…	BP	DOWN
GO:0007565	female pregnancy	0.000199	0.00618	1.79	9959	70	2546	32	[Igf2 - insulin-like growth factor 2, Igf1 - insulin-like growth factor 1, Fosl2 - fos-like antigen 2, Nos3 - nitric oxide synthase 3, endothelial cell, Mapt - microtubule-associated protein tau, Nos1 - nitric oxide synthase 1, neuronal, Hspb1 - heat shock protein 1, Fosb - fbj osteosarcoma oncogene b, Il1rn - interleukin 1 receptor antagonist, Sts - steroid sulfatase (microsomal), isozyme s, Irf…	BP	DOWN
GO:0002696	positive regulation of leukocyte activation	0.000202	0.00625	1.49	9959	171	2546	65	[Hlx - h2.0-like homeobox, Prkcz - protein kinase c, zeta, Socs1 - suppressor of cytokine signaling 1, Pnp - purine nucleoside phosphorylase, Il13ra1 - interleukin 13 receptor, alpha 1, Coro1a - coronin, actin binding protein 1a, Il23a - interleukin 23, alpha subunit p19, Efnb3 - ephrin b3, Atp11c - atpase, class vi, type 11c, Cd83 - cd83 molecule, Vcam1 - vascular cell adhesion molecule 1, Bcl6 …	BP	DOWN
GO:0019220	regulation of phosphate metabolic process	0.000203	0.00628	1.17	9959	1145	2546	343	[Cdk5r1 - cyclin-dependent kinase 5, regulatory subunit 1 (p35), Dusp4 - dual specificity phosphatase 4, Ppp1r12a - protein phosphatase 1, regulatory subunit 12a, Rasip1 - ras interacting protein 1, Cxcr4 - chemokine (c-x-c motif) receptor 4, Hrc - histidine rich calcium binding protein, Peli2 - pellino e3 ubiquitin protein ligase family member 2, Socs1 - suppressor of cytokine signaling 1, Ptprj…	BP	DOWN
GO:0031214	biomineral tissue development	0.000205	0.00633	2	9959	45	2546	23	[Bmp2 - bone morphogenetic protein 2, Igf1 - insulin-like growth factor 1, Sbno2 - strawberry notch homolog 2 (drosophila), Ibsp - integrin-binding sialoprotein, Gpc3 - glypican 3, Klf10 - kruppel-like factor 10, Comp - cartilage oligomeric matrix protein, Ptgs2 - prostaglandin-endoperoxide synthase 2, Msx2 - msh homeobox 2, Alpl - alkaline phosphatase, liver/bone/kidney, Phex - phosphate regulat…	BP	DOWN
GO:0060415	muscle tissue morphogenesis	0.000205	0.00632	2	9959	45	2546	23	[Bmp2 - bone morphogenetic protein 2, Tpm1 - tropomyosin 1, alpha, Mylk2 - myosin light chain kinase 2, Bmpr1a - bone morphogenetic protein receptor, type ia, Myom1 - myomesin 1, Ryr2 - ryanodine receptor 2, cardiac, Foxc2 - forkhead box c2, Chd7 - chromodomain helicase dna binding protein 7, Mylk - myosin light chain kinase, Tnnc1 - troponin c type 1 (slow), Actc1 - actin, alpha, cardiac muscle …	BP	DOWN
GO:0051963	regulation of synapse assembly	0.00021	0.00644	1.89	9959	56	2546	27	[Agrn - agrin, Cbln2 - cerebellin 2 precursor, Ntng2 - netrin g2, Nptx1 - neuronal pentraxin i, Thbs2 - thrombospondin 2, Ppp1r9a - protein phosphatase 1, regulatory subunit 9a, Lrrc4b - leucine rich repeat containing 4b, Nlgn3 - neuroligin 3, Amigo1 - adhesion molecule with ig like domain 1, Ntrk2 - neurotrophic tyrosine kinase, receptor, type 2, Lrrc24 - leucine rich repeat containing 24, Mdga2…	BP	DOWN
GO:0099601	regulation of neurotransmitter receptor activity	0.00021	0.00645	2.32	9959	27	2546	16	[Ptk2b - protein tyrosine kinase 2 beta, Cacng7 - calcium channel, voltage-dependent, gamma subunit 7, Lypd6 - ly6/plaur domain containing 6, Klhl24 - kelch-like family member 24, Nptx1 - neuronal pentraxin i, Rasgrf2 - ras protein-specific guanine nucleotide-releasing factor 2, Pink1 - pten induced putative kinase 1, Nlgn1 - neuroligin 1, Nlgn3 - neuroligin 3, Ppargc1a - peroxisome proliferator-…	BP	DOWN
GO:0006911	phagocytosis, engulfment	0.00021	0.00643	2.32	9959	27	2546	16	[Elmo1 - engulfment and cell motility 1, Bai1 - brain-specific angiogenesis inhibitor 1, Itgb2 - integrin, beta 2, Arhgap25 - rho gtpase activating protein 25, Rac3 - ras-related c3 botulinum toxin substrate 3 (rho family, small gtp binding protein rac3), Gulp1 - gulp, engulfment adaptor ptb domain containing 1, Rhobtb2 - rho-related btb domain containing 2, Fcgr2b - fc fragment of igg, low affin…	BP	DOWN
GO:0050731	positive regulation of peptidyl-tyrosine phosphorylation	0.000212	0.00647	1.58	9959	121	2546	49	[Hsph1 - heat shock 105/110 protein 1, Ptk2b - protein tyrosine kinase 2 beta, Ghr - growth hormone receptor, Ptprj - protein tyrosine phosphatase, receptor type, j, Il23a - interleukin 23, alpha subunit p19, Csf1r - colony stimulating factor 1 receptor, Hcls1 - hematopoietic cell specific lyn substrate 1, Dlg3 - discs, large homolog 3 (drosophila), Stap1 - signal transducing adaptor family membe…	BP	DOWN
GO:0051966	regulation of synaptic transmission, glutamatergic	0.000212	0.00647	2.2	9959	32	2546	18	[Ptk2b - protein tyrosine kinase 2 beta, Htr1b - 5-hydroxytryptamine (serotonin) receptor 1b, g protein-coupled, Cacng7 - calcium channel, voltage-dependent, gamma subunit 7, Ngfr - nerve growth factor receptor, Ptgs2 - prostaglandin-endoperoxide synthase 2, Serpine2 - serpin peptidase inhibitor, clade e (nexin, plasminogen activator inhibitor type 1), member 2, Nlgn1 - neuroligin 1, Grm2 - gluta…	BP	DOWN
GO:0032946	positive regulation of mononuclear cell proliferation	0.000213	0.00649	1.75	9959	76	2546	34	[Igf2 - insulin-like growth factor 2, Nckap1l - nck associated protein 1 like, Igf1 - insulin-like growth factor 1, Hes1 - hairy and enhancer of split 1 (drosophila), Peli1 - pellino e3 ubiquitin protein ligase 1, Pnp - purine nucleoside phosphorylase, Cd74 - cd74 molecule, major histocompatibility complex, class ii invariant chain, Il13ra1 - interleukin 13 receptor, alpha 1, Ptprc - protein tyro…	BP	DOWN
GO:0090101	negative regulation of transmembrane receptor protein serine/threonine kinase signaling pathway	0.000213	0.00647	1.75	9959	76	2546	34	[Magi2 - membrane associated guanylate kinase, ww and pdz domain containing 2, Synj2bp - synaptojanin 2 binding protein, Dact2 - dishevelled-binding antagonist of beta-catenin 2, Bambi - bmp and activin membrane-bound inhibitor, Bcl9l - b-cell cll/lymphoma 9-like, Wfikkn2 - wap, follistatin/kazal, immunoglobulin, kunitz and netrin domain containing 2, Nrros - negative regulator of reactive oxygen…	BP	DOWN
GO:0051174	regulation of phosphorus metabolic process	0.000218	0.0066	1.17	9959	1146	2546	343	[Cdk5r1 - cyclin-dependent kinase 5, regulatory subunit 1 (p35), Dusp4 - dual specificity phosphatase 4, Ppp1r12a - protein phosphatase 1, regulatory subunit 12a, Rasip1 - ras interacting protein 1, Cxcr4 - chemokine (c-x-c motif) receptor 4, Hrc - histidine rich calcium binding protein, Peli2 - pellino e3 ubiquitin protein ligase family member 2, Socs1 - suppressor of cytokine signaling 1, Ptprj…	BP	DOWN
GO:0032970	regulation of actin filament-based process	0.000226	0.00681	1.38	9959	273	2546	96	[Rgs4 - regulator of g-protein signaling 4, Ptk2b - protein tyrosine kinase 2 beta, Limch1 - lim and calponin homology domains 1, Cdk5r1 - cyclin-dependent kinase 5, regulatory subunit 1 (p35), Plekhh2 - pleckstrin homology domain containing, family h (with myth4 domain) member 2, Cacna1h - calcium channel, voltage-dependent, t type, alpha 1h subunit, Ep300 - e1a binding protein p300, Rhov - ras …	BP	DOWN
GO:0030239	myofibril assembly	0.000231	0.00695	2.54	9959	20	2546	13	[Pgm5 - phosphoglucomutase 5, Myom1 - myomesin 1, Mylk3 - myosin light chain kinase 3, Tmod4 - tropomodulin 4, Fhod3 - formin homology 2 domain containing 3, Actc1 - actin, alpha, cardiac muscle 1, Srf - serum response factor (c-fos serum response element-binding transcription factor), Obsl1 - obscurin-like 1, Myh6 - myosin, heavy chain 6, cardiac muscle, alpha, Tmod2 - tropomodulin 2, Tmod1 - tr…	BP	DOWN
GO:0046456	icosanoid biosynthetic process	0.000231	0.00694	2.54	9959	20	2546	13	[Ptgds - prostaglandin d2 synthase (brain), Ptgis - prostaglandin i2 (prostacyclin) synthase, Alox12 - arachidonate 12-lipoxygenase, Pla2g4a - phospholipase a2, group iva (cytosolic, calcium-dependent), Cd74 - cd74 molecule, major histocompatibility complex, class ii invariant chain, Ptgs2 - prostaglandin-endoperoxide synthase 2, Alox5 - arachidonate 5-lipoxygenase, Ggt5 - gamma-glutamyltransfera…	BP	DOWN
GO:0007612	learning	0.000231	0.00695	1.66	9959	94	2546	40	[Jph3 - junctophilin 3, Fgf13 - fibroblast growth factor 13, Fosl2 - fos-like antigen 2, Apbb1 - amyloid beta (a4) precursor protein-binding, family b, member 1 (fe65), Nrgn - neurogranin, Ppt1 - palmitoyl-protein thioesterase 1, Nlgn3 - neuroligin 3, Ntrk2 - neurotrophic tyrosine kinase, receptor, type 2, Srf - serum response factor (c-fos serum response element-binding transcription factor), Ap…	BP	DOWN
GO:0007411	axon guidance	0.000231	0.00693	1.66	9959	94	2546	40	[B3gnt2 - udp-glcnac:betagal beta-1,3-n-acetylglucosaminyltransferase 2, Cdk5r1 - cyclin-dependent kinase 5, regulatory subunit 1 (p35), Gli2 - gli family zinc finger 2, Plxna4a - plexin a4, a, Apbb1 - amyloid beta (a4) precursor protein-binding, family b, member 1 (fe65), Cxcr4 - chemokine (c-x-c motif) receptor 4, Cyfip2 - cytoplasmic fmr1 interacting protein 2, Ngfr - nerve growth factor recep…	BP	DOWN
GO:0009409	response to cold	0.000232	0.00694	1.96	9959	48	2546	24	[Slc27a1 - solute carrier family 27 (fatty acid transporter), member 1, Fosl2 - fos-like antigen 2, Vwf - von willebrand factor, Acadm - acyl-coa dehydrogenase, c-4 to c-12 straight chain, Fos - fbj osteosarcoma oncogene, Hspa2 - heat shock protein 2, LOC100910270 - uncharacterized loc100910270, Gmpr - guanosine monophosphate reductase, Thra - thyroid hormone receptor alpha, Ppargc1a - peroxisome…	BP	DOWN
GO:0055008	cardiac muscle tissue morphogenesis	0.000238	0.00709	2.05	9959	40	2546	21	[Bmp2 - bone morphogenetic protein 2, Tpm1 - tropomyosin 1, alpha, Mylk2 - myosin light chain kinase 2, Myom1 - myomesin 1, Bmpr1a - bone morphogenetic protein receptor, type ia, Ryr2 - ryanodine receptor 2, cardiac, Foxc2 - forkhead box c2, Chd7 - chromodomain helicase dna binding protein 7, Tnnc1 - troponin c type 1 (slow), Smad7 - smad family member 7, Actc1 - actin, alpha, cardiac muscle 1, T…	BP	DOWN
GO:0010975	regulation of neuron projection development	0.000251	0.00747	1.3	9959	406	2546	135	[Fgf13 - fibroblast growth factor 13, Magi2 - membrane associated guanylate kinase, ww and pdz domain containing 2, Cdk5r1 - cyclin-dependent kinase 5, regulatory subunit 1 (p35), Sema5b - sema domain, seven thrombospondin repeats (type 1 and type 1-like), transmembrane domain (tm) and short cytoplasmic domain, (semaphorin) 5b, Cxcr4 - chemokine (c-x-c motif) receptor 4, Ngfr - nerve growth facto…	BP	DOWN
GO:0071622	regulation of granulocyte chemotaxis	0.000266	0.00789	2.12	9959	35	2546	19	[Nckap1l - nck associated protein 1 like, Ccl21 - chemokine (c-c motif) ligand 21, C5ar1 - complement component 5a receptor 1, Cd74 - cd74 molecule, major histocompatibility complex, class ii invariant chain, Ccl2 - chemokine (c-c motif) ligand 2, Ptprj - protein tyrosine phosphatase, receptor type, j, Ccl19 - chemokine (c-c motif) ligand 19, Il23a - interleukin 23, alpha subunit p19, Fam65b - fa…	BP	DOWN
GO:0033198	response to ATP	0.000275	0.00815	2.35	9959	25	2546	15	[Asph - aspartate-beta-hydroxylase, Ptgs2 - prostaglandin-endoperoxide synthase 2, P2rx5 - purinergic receptor p2x, ligand-gated ion channel, 5, Ccl2 - chemokine (c-c motif) ligand 2, Trpv1 - transient receptor potential cation channel, subfamily v, member 1, Trpm4 - transient receptor potential cation channel, subfamily m, member 4, P2ry12 - purinergic receptor p2y, g-protein coupled, 12, Trpc3 …	BP	DOWN
GO:0030509	BMP signaling pathway	0.000276	0.00815	2	9959	43	2546	22	[Bmp2 - bone morphogenetic protein 2, Fam83g - family with sequence similarity 83, member g, Twsg1 - twisted gastrulation homolog 1 (drosophila), Acvrl1 - activin a receptor type ii-like 1, Bmp7 - bone morphogenetic protein 7, Bmpr1a - bone morphogenetic protein receptor, type ia, Comp - cartilage oligomeric matrix protein, Ryr2 - ryanodine receptor 2, cardiac, Bmp5 - bone morphogenetic protein 5…	BP	DOWN
GO:0098870	action potential propagation	0.000278	0.0082	3.91	9959	6	2546	6	[Ntrk3 - neurotrophic tyrosine kinase, receptor, type 3, Ntrk2 - neurotrophic tyrosine kinase, receptor, type 2, Scn1b - sodium channel, voltage-gated, type i, beta, Cntnap1 - contactin associated protein 1, Pmp22 - peripheral myelin protein 22, Cacnb4 - calcium channel, voltage-dependent, beta 4 subunit]	BP	DOWN
GO:0019227	neuronal action potential propagation	0.000278	0.00818	3.91	9959	6	2546	6	[Ntrk3 - neurotrophic tyrosine kinase, receptor, type 3, Ntrk2 - neurotrophic tyrosine kinase, receptor, type 2, Scn1b - sodium channel, voltage-gated, type i, beta, Cntnap1 - contactin associated protein 1, Pmp22 - peripheral myelin protein 22, Cacnb4 - calcium channel, voltage-dependent, beta 4 subunit]	BP	DOWN
GO:1903818	positive regulation of voltage-gated potassium channel activity	0.000278	0.00817	3.91	9959	6	2546	6	[Akap6 - a kinase (prka) anchor protein 6, Abcc8 - atp-binding cassette, subfamily c (cftr/mrp), member 8, Kcne1 - potassium voltage-gated channel, isk-related family, member 1, Lrrc38 - leucine rich repeat containing 38, Rnf207 - ring finger protein 207, Akap7 - a kinase (prka) anchor protein 7]	BP	DOWN
GO:0060371	regulation of atrial cardiac muscle cell membrane depolarization	0.000278	0.00815	3.91	9959	6	2546	6	[Scn1b - sodium channel, voltage-gated, type i, beta, Scn3b - sodium channel, voltage-gated, type iii, beta, Gja5 - gap junction protein, alpha 5, Cacna1g - calcium channel, voltage-dependent, t type, alpha 1g subunit, Scn2b - sodium channel, voltage-gated, type ii, beta, Gja1 - gap junction protein, alpha 1]	BP	DOWN
GO:0031622	positive regulation of fever generation	0.000278	0.00813	3.91	9959	6	2546	6	[Ccr5 - chemokine (c-c motif) receptor 5, Tnf - tumor necrosis factor, Ptger3 - prostaglandin e receptor 3 (subtype ep3), Il1b - interleukin 1 beta, Pla2g4a - phospholipase a2, group iva (cytosolic, calcium-dependent), Ptgs2 - prostaglandin-endoperoxide synthase 2]	BP	DOWN
GO:0031620	regulation of fever generation	0.000278	0.00812	3.91	9959	6	2546	6	[Ccr5 - chemokine (c-c motif) receptor 5, Ptger3 - prostaglandin e receptor 3 (subtype ep3), Tnf - tumor necrosis factor, Ptgs2 - prostaglandin-endoperoxide synthase 2, Pla2g4a - phospholipase a2, group iva (cytosolic, calcium-dependent), Il1b - interleukin 1 beta]	BP	DOWN
GO:0022408	negative regulation of cell-cell adhesion	0.000283	0.00826	1.59	9959	113	2546	46	[Tnfaip8l2 - tumor necrosis factor, alpha-induced protein 8-like 2, Hlx - h2.0-like homeobox, Epcam - epithelial cell adhesion molecule, Epb4.1l5 - erythrocyte membrane protein band 4.1 like 5, Peli1 - pellino e3 ubiquitin protein ligase 1, Kng1 - kininogen 1, Alox12 - arachidonate 12-lipoxygenase, Socs1 - suppressor of cytokine signaling 1, Cd74 - cd74 molecule, major histocompatibility complex,…	BP	DOWN
GO:0010460	positive regulation of heart rate	0.000286	0.00833	2.61	9959	18	2546	12	[Rgs4 - regulator of g-protein signaling 4, Gch1 - gtp cyclohydrolase 1, Tpm1 - tropomyosin 1, alpha, Scn3b - sodium channel, voltage-gated, type iii, beta, Trpm4 - transient receptor potential cation channel, subfamily m, member 4, Adrb1 - adrenoceptor beta 1, Hrc - histidine rich calcium binding protein, Ryr2 - ryanodine receptor 2, cardiac, Crhr2 - corticotropin releasing hormone receptor 2, P…	BP	DOWN
GO:0048511	rhythmic process	0.000289	0.00838	1.43	9959	202	2546	74	[Cdk5r1 - cyclin-dependent kinase 5, regulatory subunit 1 (p35), Amh - anti-mullerian hormone, Nos3 - nitric oxide synthase 3, endothelial cell, Ep300 - e1a binding protein p300, Usp2 - ubiquitin specific peptidase 2, Klf10 - kruppel-like factor 10, Ngfr - nerve growth factor receptor, Gdf10 - growth differentiation factor 10, Phlpp1 - ph domain and leucine rich repeat protein phosphatase 1, Pam …	BP	DOWN
GO:0120161	regulation of cold-induced thermogenesis	0.000299	0.00865	1.63	9959	101	2546	42	[Lama4 - laminin, alpha 4, Mfap2 - microfibrillar-associated protein 2, Irf4 - interferon regulatory factor 4, Cxcr4 - chemokine (c-x-c motif) receptor 4, Zfp423 - zinc finger protein 423, LOC100910270 - uncharacterized loc100910270, Thra - thyroid hormone receptor alpha, Gnas - gnas complex locus, Esrrg - estrogen-related receptor gamma, Ppargc1b - peroxisome proliferator-activated receptor gamm…	BP	DOWN
GO:0007631	feeding behavior	0.000319	0.00923	2.06	9959	38	2546	20	[Agtr1b - angiotensin ii receptor, type 1b, Htr1b - 5-hydroxytryptamine (serotonin) receptor 1b, g protein-coupled, Lepr - leptin receptor, Fosl2 - fos-like antigen 2, Gigyf2 - grb10 interacting gyf protein 2, Fos - fbj osteosarcoma oncogene, Ace - angiotensin i converting enzyme, Gdf15 - growth differentiation factor 15, Aplp2 - amyloid beta (a4) precursor-like protein 2, Ntrk2 - neurotrophic ty…	BP	DOWN
GO:0050764	regulation of phagocytosis	0.000321	0.00926	1.83	9959	60	2546	28	[Nckap1l - nck associated protein 1 like, Hck - hemopoietic cell kinase, C4b - complement component 4b (chido blood group), Prkcg - protein kinase c, gamma, Ptprj - protein tyrosine phosphatase, receptor type, j, Ptprc - protein tyrosine phosphatase, receptor type, c, Hspa8 - heat shock 70kda protein 8, Dock2 - dedicator of cytokinesis 2, Fcgr2b - fc fragment of igg, low affinity iib, receptor (c…	BP	DOWN
GO:0035239	tube morphogenesis	0.000328	0.00943	1.42	9959	206	2546	75	[Pspn - persephin, Gli2 - gli family zinc finger 2, Nfatc1 - nuclear factor of activated t-cells, cytoplasmic, calcineurin-dependent 1, Dchs1 - dachsous 1 (drosophila), Acvrl1 - activin a receptor type ii-like 1, Rasip1 - ras interacting protein 1, Gpc3 - glypican 3, Cxcr4 - chemokine (c-x-c motif) receptor 4, Setd2 - set domain containing 2, Col4a1 - collagen, type iv, alpha 1, Chd7 - chromodoma…	BP	DOWN
GO:0030029	actin filament-based process	0.000335	0.00961	1.37	9959	269	2546	94	[Elmo1 - engulfment and cell motility 1, Aqp1 - aquaporin 1, Limch1 - lim and calponin homology domains 1, Ptk2b - protein tyrosine kinase 2 beta, Tesk2 - testis-specific kinase 2, Epb4.1l5 - erythrocyte membrane protein band 4.1 like 5, Diaph1 - diaphanous-related formin 1, Rhov - ras homolog family member v, Arhgef10l - rho guanine nucleotide exchange factor (gef) 10-like, Tmod4 - tropomodulin …	BP	DOWN
GO:0090066	regulation of anatomical structure size	0.000346	0.00992	1.35	9959	286	2546	99	[Plekhh2 - pleckstrin homology domain containing, family h (with myth4 domain) member 2, Nos3 - nitric oxide synthase 3, endothelial cell, Nos1 - nitric oxide synthase 1, neuronal, Tmod4 - tropomodulin 4, Npr1 - natriuretic peptide receptor a/guanylate cyclase a (atrionatriuretic peptide receptor a), Coro1a - coronin, actin binding protein 1a, Sema5a - sema domain, seven thrombospondin repeats (t…	BP	DOWN
GO:0032148	activation of protein kinase B activity	0.000349	0.00997	2.69	9959	16	2546	11	[Fgf1 - fibroblast growth factor 1 (acidic), Ntrk3 - neurotrophic tyrosine kinase, receptor, type 3, Igf1 - insulin-like growth factor 1, Insr - insulin receptor, Adra2a - adrenoceptor alpha 2a, Src - v-src avian sarcoma (schmidt-ruppin a-2) viral oncogene homolog, Prkcz - protein kinase c, zeta, Il18 - interleukin 18, Pdgfb - platelet-derived growth factor beta polypeptide, Ntf3 - neurotrophin 3…	BP	DOWN
GO:0140115	export across plasma membrane	0.000349	0.00995	2.69	9959	16	2546	11	[Kcnh2 - potassium voltage-gated channel, subfamily h (eag-related), member 2, Kcne4 - potassium voltage-gated channel, isk-related family, member 4, Kcnip2 - kv channel-interacting protein 2, Kcne1 - potassium voltage-gated channel, isk-related family, member 1, Kcna5 - potassium voltage-gated channel, shaker-related subfamily, member 5, Atp1b1 - atpase, na+/k+ transporting, beta 1 polypeptide, …	BP	DOWN
GO:0000188	inactivation of MAPK activity	0.000349	0.00993	2.69	9959	16	2546	11	[Lax1 - lymphocyte transmembrane adaptor 1, Dusp4 - dual specificity phosphatase 4, Dusp3 - dual specificity phosphatase 3, Dusp10 - dual specificity phosphatase 10, Dusp1 - dual specificity phosphatase 1, Dusp6 - dual specificity phosphatase 6, Spred2 - sprouty-related, evh1 domain containing 2, Dusp2 - dual specificity phosphatase 2, Dusp16 - dual specificity phosphatase 16, Dusp5 - dual specif…	BP	DOWN
GO:0030195	negative regulation of blood coagulation	0.000358	0.0102	2.38	9959	23	2546	14	[Kng1 - kininogen 1, Cd34 - cd34 molecule, Alox12 - arachidonate 12-lipoxygenase, Serpine2 - serpin peptidase inhibitor, clade e (nexin, plasminogen activator inhibitor type 1), member 2, Cd9 - cd9 molecule, Serping1 - serpin peptidase inhibitor, clade g (c1 inhibitor), member 1, Apoe - apolipoprotein e, Plg - plasminogen, Ptger3 - prostaglandin e receptor 3 (subtype ep3), Adtrp - androgen-depend…	BP	DOWN
GO:0007606	sensory perception of chemical stimulus	0.000358	0.0102	2.38	9959	23	2546	14	[B3gnt2 - udp-glcnac:betagal beta-1,3-n-acetylglucosaminyltransferase 2, Plcb2 - phospholipase c, beta 2, Bbs4 - bardet-biedl syndrome 4, Trpm5 - transient receptor potential cation channel, subfamily m, member 5, Tas2r135 - taste receptor, type 2, member 135, Scnn1a - sodium channel, nonvoltage-gated 1 alpha, Nav2 - neuron navigator 2, Gnal - guanine nucleotide binding protein, alpha stimulating…	BP	DOWN
GO:0010035	response to inorganic substance	0.000359	0.0102	1.27	9959	461	2546	150	[Dnmt3a - dna (cytosine-5-)-methyltransferase 3 alpha, Acadm - acyl-coa dehydrogenase, c-4 to c-12 straight chain, Nos3 - nitric oxide synthase 3, endothelial cell, Asph - aspartate-beta-hydroxylase, Nos1 - nitric oxide synthase 1, neuronal, Tnnc1 - troponin c type 1 (slow), Cfh - complement factor h, Apobec1 - apolipoprotein b mrna editing enzyme, catalytic polypeptide 1, Vcam1 - vascular cell a…	BP	DOWN
GO:0031667	response to nutrient levels	0.000368	0.0104	1.28	9959	430	2546	141	[Vwf - von willebrand factor, Dnmt3a - dna (cytosine-5-)-methyltransferase 3 alpha, Acadm - acyl-coa dehydrogenase, c-4 to c-12 straight chain, Nos3 - nitric oxide synthase 3, endothelial cell, Klf10 - kruppel-like factor 10, Asph - aspartate-beta-hydroxylase, Nos1 - nitric oxide synthase 1, neuronal, P2rx5 - purinergic receptor p2x, ligand-gated ion channel, 5, Atf3 - activating transcription fa…	BP	DOWN
GO:0050808	synapse organization	0.000373	0.0105	1.59	9959	108	2546	44	[Magi2 - membrane associated guanylate kinase, ww and pdz domain containing 2, Agrn - agrin, Apbb1 - amyloid beta (a4) precursor protein-binding, family b, member 1 (fe65), Ngef - neuronal guanine nucleotide exchange factor, Plxnd1 - plexin d1, Mapt - microtubule-associated protein tau, Col4a1 - collagen, type iv, alpha 1, Ache - acetylcholinesterase, Hspa8 - heat shock 70kda protein 8, Nlgn3 - n…	BP	DOWN
GO:1902622	regulation of neutrophil migration	0.000375	0.0105	2.24	9959	28	2546	16	[Nckap1l - nck associated protein 1 like, C5ar1 - complement component 5a receptor 1, Ccl21 - chemokine (c-c motif) ligand 21, Cd74 - cd74 molecule, major histocompatibility complex, class ii invariant chain, Ccl19 - chemokine (c-c motif) ligand 19, Il23a - interleukin 23, alpha subunit p19, Fam65b - family with sequence similarity 65, member b, Dapk2 - death-associated protein kinase 2, Ednra - …	BP	DOWN
GO:0042102	positive regulation of T cell proliferation	0.000377	0.0106	1.88	9959	52	2546	25	[Igf2 - insulin-like growth factor 2, Nckap1l - nck associated protein 1 like, Igf1 - insulin-like growth factor 1, Hes1 - hairy and enhancer of split 1 (drosophila), Pnp - purine nucleoside phosphorylase, Ptprc - protein tyrosine phosphatase, receptor type, c, Coro1a - coronin, actin binding protein 1a, Il23a - interleukin 23, alpha subunit p19, Vcam1 - vascular cell adhesion molecule 1, Il6r - …	BP	DOWN
GO:0002757	immune response-activating signal transduction	0.000379	0.0106	1.6	9959	105	2546	43	[Nckap1l - nck associated protein 1 like, Gpld1 - glycosylphosphatidylinositol specific phospholipase d1, Themis2 - thymocyte selection associated family member 2, C5ar1 - complement component 5a receptor 1, Blk - b lymphoid tyrosine kinase, Ticam2 - toll-like receptor adaptor molecule 2, Klhl6 - kelch-like family member 6, Tnfrsf21 - tumor necrosis factor receptor superfamily, member 21, Ptprc -…	BP	DOWN
GO:0014706	striated muscle tissue development	0.000389	0.0109	1.71	9959	78	2546	34	[Hlx - h2.0-like homeobox, Itga7 - integrin, alpha 7, Dmd - dystrophin, Popdc2 - popeye domain containing 2, Ep300 - e1a binding protein p300, Svil - supervillin, Adamts9 - adam metallopeptidase with thrombospondin type 1 motif, 9, Kcnab1 - potassium voltage-gated channel, shaker-related subfamily, beta member 1, Bmp5 - bone morphogenetic protein 5, Hspa8 - heat shock 70kda protein 8, Ppp1r13l - …	BP	DOWN
GO:1903038	negative regulation of leukocyte cell-cell adhesion	0.000393	0.011	1.69	9959	81	2546	35	[Tnfaip8l2 - tumor necrosis factor, alpha-induced protein 8-like 2, Hlx - h2.0-like homeobox, Peli1 - pellino e3 ubiquitin protein ligase 1, Kng1 - kininogen 1, Socs1 - suppressor of cytokine signaling 1, Cd74 - cd74 molecule, major histocompatibility complex, class ii invariant chain, Lag3 - lymphocyte-activation gene 3, Tnfrsf21 - tumor necrosis factor receptor superfamily, member 21, LOC679811…	BP	DOWN
GO:0051153	regulation of striated muscle cell differentiation	0.000395	0.011	1.68	9959	84	2546	36	[Rgs4 - regulator of g-protein signaling 4, Igf1 - insulin-like growth factor 1, Cd53 - cd53 molecule, Hopx - hop homeobox, Pi16 - peptidase inhibitor 16, Mylk3 - myosin light chain kinase 3, Ep300 - e1a binding protein p300, Rbm24 - rna binding motif protein 24, Thra - thyroid hormone receptor alpha, Fam65b - family with sequence similarity 65, member b, Ppara - peroxisome proliferator activated…	BP	DOWN
GO:0051251	positive regulation of lymphocyte activation	0.0004	0.0111	1.5	9959	149	2546	57	[Hlx - h2.0-like homeobox, Prkcz - protein kinase c, zeta, Socs1 - suppressor of cytokine signaling 1, Pnp - purine nucleoside phosphorylase, Il13ra1 - interleukin 13 receptor, alpha 1, Coro1a - coronin, actin binding protein 1a, Il23a - interleukin 23, alpha subunit p19, Efnb3 - ephrin b3, Atp11c - atpase, class vi, type 11c, Cd83 - cd83 molecule, Vcam1 - vascular cell adhesion molecule 1, Bcl6 …	BP	DOWN
GO:0002548	monocyte chemotaxis	0.000412	0.0114	2.79	9959	14	2546	10	[Ccl6 - chemokine (c-c motif) ligand 6, Cx3cl1 - chemokine (c-x3-c motif) ligand 1, Ptpro - protein tyrosine phosphatase, receptor type, o, Ccl4 - chemokine (c-c motif) ligand 4, Ccl21 - chemokine (c-c motif) ligand 21, Ccl3 - chemokine (c-c motif) ligand 3, Ccl2 - chemokine (c-c motif) ligand 2, Pdgfb - platelet-derived growth factor beta polypeptide, Ccl19 - chemokine (c-c motif) ligand 19, Ccl…	BP	DOWN
GO:0007218	neuropeptide signaling pathway	0.000412	0.0114	2.79	9959	14	2546	10	[Sstr4 - somatostatin receptor 4, Npy1r - neuropeptide y receptor y1, Glp1r - glucagon-like peptide 1 receptor, Sort1 - sortilin 1, Gpr83 - g protein-coupled receptor 83, Scg5 - secretogranin v (7b2 protein), Oprk1 - opioid receptor, kappa 1, Gal - galanin/gmap prepropeptide, Penk - proenkephalin, Rxfp3 - relaxin/insulin-like family peptide receptor 3]	BP	DOWN
GO:0001667	ameboidal-type cell migration	0.00042	0.0116	1.55	9959	124	2546	49	[Ptk2b - protein tyrosine kinase 2 beta, Sema5b - sema domain, seven thrombospondin repeats (type 1 and type 1-like), transmembrane domain (tm) and short cytoplasmic domain, (semaphorin) 5b, Sema6d - sema domain, transmembrane domain (tm), and cytoplasmic domain, (semaphorin) 6d, Epb4.1l5 - erythrocyte membrane protein band 4.1 like 5, Nos3 - nitric oxide synthase 3, endothelial cell, Gpc3 - glyp…	BP	DOWN
GO:0034097	response to cytokine	0.000425	0.0117	1.26	9959	487	2546	157	[Trim63 - tripartite motif containing 63, e3 ubiquitin protein ligase, Nos3 - nitric oxide synthase 3, endothelial cell, Cxcr4 - chemokine (c-x-c motif) receptor 4, Socs1 - suppressor of cytokine signaling 1, Coro1a - coronin, actin binding protein 1a, Il1rn - interleukin 1 receptor antagonist, Cfh - complement factor h, Abcg4 - atp-binding cassette, subfamily g (white), member 4, Gbp4 - guanylat…	BP	DOWN
GO:0071435	potassium ion export	0.000441	0.0121	3.42	9959	8	2546	7	[Kcnh2 - potassium voltage-gated channel, subfamily h (eag-related), member 2, Kcne4 - potassium voltage-gated channel, isk-related family, member 4, Kcnip2 - kv channel-interacting protein 2, Kcne1 - potassium voltage-gated channel, isk-related family, member 1, Kcna5 - potassium voltage-gated channel, shaker-related subfamily, member 5, Kcnq1 - potassium voltage-gated channel, kqt-like subfamil…	BP	DOWN
GO:0071415	cellular response to purine-containing compound	0.000441	0.0121	3.42	9959	8	2546	7	[P2ry6 - pyrimidinergic receptor p2y, g-protein coupled, 6, P2ry2 - purinergic receptor p2y, g-protein coupled, 2, Trpm2 - transient receptor potential cation channel, subfamily m, member 2, Ryr2 - ryanodine receptor 2, cardiac, Gstm7 - glutathione s-transferase, mu 7, Casq2 - calsequestrin 2 (cardiac muscle), Ppargc1a - peroxisome proliferator-activated receptor gamma, coactivator 1 alpha]	BP	DOWN
GO:0050482	arachidonic acid secretion	0.000441	0.0121	3.42	9959	8	2546	7	[Pla2g5 - phospholipase a2, group v, Pla2g12a - phospholipase a2, group xiia, Pla2g4a - phospholipase a2, group iva (cytosolic, calcium-dependent), Bdkrb2 - bradykinin receptor b2, Proca1 - protein interacting with cyclin a1, Ace - angiotensin i converting enzyme, Pnpla8 - patatin-like phospholipase domain containing 8]	BP	DOWN
GO:1903963	arachidonate transport	0.000441	0.0121	3.42	9959	8	2546	7	[Pla2g5 - phospholipase a2, group v, Pla2g12a - phospholipase a2, group xiia, Pla2g4a - phospholipase a2, group iva (cytosolic, calcium-dependent), Bdkrb2 - bradykinin receptor b2, Proca1 - protein interacting with cyclin a1, Ace - angiotensin i converting enzyme, Pnpla8 - patatin-like phospholipase domain containing 8]	BP	DOWN
GO:0035588	G protein-coupled purinergic receptor signaling pathway	0.000441	0.012	3.42	9959	8	2546	7	[Adcy5 - adenylate cyclase 5, P2ry6 - pyrimidinergic receptor p2y, g-protein coupled, 6, P2ry2 - purinergic receptor p2y, g-protein coupled, 2, P2ry12 - purinergic receptor p2y, g-protein coupled, 12, Adora2a - adenosine a2a receptor, P2ry14 - purinergic receptor p2y, g-protein coupled, 14, Gpr34 - g protein-coupled receptor 34]	BP	DOWN
GO:0097623	potassium ion export across plasma membrane	0.000441	0.012	3.42	9959	8	2546	7	[Kcnh2 - potassium voltage-gated channel, subfamily h (eag-related), member 2, Kcne4 - potassium voltage-gated channel, isk-related family, member 4, Kcnip2 - kv channel-interacting protein 2, Kcne1 - potassium voltage-gated channel, isk-related family, member 1, Kcna5 - potassium voltage-gated channel, shaker-related subfamily, member 5, Kcnq1 - potassium voltage-gated channel, kqt-like subfamil…	BP	DOWN
GO:0061138	morphogenesis of a branching epithelium	0.000463	0.0126	1.57	9959	112	2546	45	[Igf1 - insulin-like growth factor 1, Gli2 - gli family zinc finger 2, Pspn - persephin, Nfatc1 - nuclear factor of activated t-cells, cytoplasmic, calcineurin-dependent 1, Dchs1 - dachsous 1 (drosophila), Rasip1 - ras interacting protein 1, Gpc3 - glypican 3, Plxnd1 - plexin d1, Cxcr4 - chemokine (c-x-c motif) receptor 4, Greb1l - growth regulation by estrogen in breast cancer-like, Col4a1 - col…	BP	DOWN
GO:0042311	vasodilation	0.000464	0.0126	2.42	9959	21	2546	13	[Gch1 - gtp cyclohydrolase 1, Kcnma1 - potassium large conductance calcium-activated channel, subfamily m, alpha member 1, Nos1 - nitric oxide synthase 1, neuronal, Kng1 - kininogen 1, Sod2 - superoxide dismutase 2, mitochondrial, Apoe - apolipoprotein e, Gpx1 - glutathione peroxidase 1, Adrb1 - adrenoceptor beta 1, Agtr2 - angiotensin ii receptor, type 2, Tnf - tumor necrosis factor, Adora2a - a…	BP	DOWN
GO:0045665	negative regulation of neuron differentiation	0.000464	0.0126	1.46	9959	169	2546	63	[Cdk5r1 - cyclin-dependent kinase 5, regulatory subunit 1 (p35), Fgf13 - fibroblast growth factor 13, Sema5b - sema domain, seven thrombospondin repeats (type 1 and type 1-like), transmembrane domain (tm) and short cytoplasmic domain, (semaphorin) 5b, Xylt1 - xylosyltransferase 1, Sema6d - sema domain, transmembrane domain (tm), and cytoplasmic domain, (semaphorin) 6d, Ngef - neuronal guanine nuc…	BP	DOWN
GO:0019229	regulation of vasoconstriction	0.000464	0.0126	1.91	9959	47	2546	23	[Agtr1b - angiotensin ii receptor, type 1b, Adra2a - adrenoceptor alpha 2a, Nos1 - nitric oxide synthase 1, neuronal, Per2 - period circadian clock 2, Ptgs2 - prostaglandin-endoperoxide synthase 2, Alox5 - arachidonate 5-lipoxygenase, Atp1a2 - atpase, na+/k+ transporting, alpha 2 polypeptide, Adra1d - adrenoceptor alpha 1d, Egfr - epidermal growth factor receptor, Cx3cl1 - chemokine (c-x3-c motif…	BP	DOWN
GO:0002076	osteoblast development	0.000466	0.0126	2.93	9959	12	2546	9	[Gli2 - gli family zinc finger 2, Lrp5 - low density lipoprotein receptor-related protein 5, Pth1r - parathyroid hormone 1 receptor, Jund - jun d proto-oncogene, Msx2 - msh homeobox 2, Hdac5 - histone deacetylase 5, Clec5a - c-type lectin domain family 5, member a, Ache - acetylcholinesterase, Esr1 - estrogen receptor 1]	BP	DOWN
GO:0140131	positive regulation of lymphocyte chemotaxis	0.000466	0.0126	2.93	9959	12	2546	9	[Ptk2b - protein tyrosine kinase 2 beta, Ccl4 - chemokine (c-c motif) ligand 4, Oxsr1 - oxidative-stress responsive 1, Adam17 - adam metallopeptidase domain 17, Ccl3 - chemokine (c-c motif) ligand 3, Ccl27 - chemokine (c-c motif) ligand 27, Stk39 - serine threonine kinase 39, Cxcl14 - chemokine (c-x-c motif) ligand 14, Cxcl13 - chemokine (c-x-c motif) ligand 13]	BP	DOWN
GO:0035587	purinergic receptor signaling pathway	0.000466	0.0125	2.93	9959	12	2546	9	[Adcy5 - adenylate cyclase 5, P2ry6 - pyrimidinergic receptor p2y, g-protein coupled, 6, P2ry2 - purinergic receptor p2y, g-protein coupled, 2, P2ry12 - purinergic receptor p2y, g-protein coupled, 12, P2rx1 - purinergic receptor p2x, ligand-gated ion channel, 1, P2rx5 - purinergic receptor p2x, ligand-gated ion channel, 5, Adora2a - adenosine a2a receptor, P2ry14 - purinergic receptor p2y, g-prot…	BP	DOWN
GO:0009991	response to extracellular stimulus	0.000466	0.0125	1.27	9959	446	2546	145	[Vwf - von willebrand factor, Dnmt3a - dna (cytosine-5-)-methyltransferase 3 alpha, Acadm - acyl-coa dehydrogenase, c-4 to c-12 straight chain, Nos3 - nitric oxide synthase 3, endothelial cell, Klf10 - kruppel-like factor 10, Nos1 - nitric oxide synthase 1, neuronal, Asph - aspartate-beta-hydroxylase, P2rx5 - purinergic receptor p2x, ligand-gated ion channel, 5, Atf3 - activating transcription fa…	BP	DOWN
GO:0010001	glial cell differentiation	0.000469	0.0126	1.77	9959	64	2546	29	[Igf1 - insulin-like growth factor 1, Hes1 - hairy and enhancer of split 1 (drosophila), C1s - complement component 1, s subcomponent, Nkx6-1 - nk6 homeobox 1, Ptprj - protein tyrosine phosphatase, receptor type, j, Mmp24 - matrix metallopeptidase 24, S100b - s100 calcium binding protein b, Tspan2 - tetraspanin 2, Trpc4 - transient receptor potential cation channel, subfamily c, member 4, Nlgn3 -…	BP	DOWN
GO:0031032	actomyosin structure organization	0.000469	0.0125	1.77	9959	64	2546	29	[Ptk2b - protein tyrosine kinase 2 beta, Limch1 - lim and calponin homology domains 1, Epb4.1l5 - erythrocyte membrane protein band 4.1 like 5, Mylk3 - myosin light chain kinase 3, Tmod4 - tropomodulin 4, Fhod3 - formin homology 2 domain containing 3, Casq1 - calsequestrin 1 (fast-twitch, skeletal muscle), Myoz1 - myozenin 1, Krt8 - keratin 8, Srf - serum response factor (c-fos serum response ele…	BP	DOWN
GO:0043434	response to peptide hormone	0.000476	0.0127	1.33	9959	312	2546	106	[Nos3 - nitric oxide synthase 3, endothelial cell, Nos1 - nitric oxide synthase 1, neuronal, Ube2b - ubiquitin-conjugating enzyme e2b, Socs1 - suppressor of cytokine signaling 1, Apobec1 - apolipoprotein b mrna editing enzyme, catalytic polypeptide 1, Glp1r - glucagon-like peptide 1 receptor, Itgb3 - integrin, beta 3, Foxo1 - forkhead box o1, Timp4 - tissue inhibitor of metalloproteinase 4, Irs2 …	BP	DOWN
GO:0015850	organic hydroxy compound transport	0.000484	0.0129	1.75	9959	67	2546	30	[Aqp1 - aquaporin 1, Slc22a1 - solute carrier family 22 (organic cation transporter), member 1, Gramd1c - gram domain containing 1c, Osbpl3 - oxysterol binding protein-like 3, Slc6a2 - solute carrier family 6 (neurotransmitter transporter), member 2, Slc16a3 - solute carrier family 16 (monocarboxylate transporter), member 3, Slc16a7 - solute carrier family 16 (monocarboxylate transporter), member…	BP	DOWN
GO:1903426	regulation of reactive oxygen species biosynthetic process	0.000484	0.0129	1.75	9959	67	2546	30	[Ptk2b - protein tyrosine kinase 2 beta, Igf1 - insulin-like growth factor 1, Ptgis - prostaglandin i2 (prostacyclin) synthase, Foxo3 - forkhead box o3, Cd34 - cd34 molecule, Esr1 - estrogen receptor 1, Sod2 - superoxide dismutase 2, mitochondrial, Slc30a10 - solute carrier family 30, member 10, Klf4 - kruppel-like factor 4 (gut), Trpv1 - transient receptor potential cation channel, subfamily v, …	BP	DOWN
GO:0071875	adrenergic receptor signaling pathway	0.000487	0.0129	3.13	9959	10	2546	8	[Adra2a - adrenoceptor alpha 2a, Adrb1 - adrenoceptor beta 1, Akap13 - a kinase (prka) anchor protein 13, Adcy9 - adenylate cyclase 9, Pde4d - phosphodiesterase 4d, camp-specific, Gnas - gnas complex locus, Adra1d - adrenoceptor alpha 1d, Pln - phospholamban]	BP	DOWN
GO:0071880	adenylate cyclase-activating adrenergic receptor signaling pathway	0.000487	0.0129	3.13	9959	10	2546	8	[Adra2a - adrenoceptor alpha 2a, Adrb1 - adrenoceptor beta 1, Akap13 - a kinase (prka) anchor protein 13, Adcy9 - adenylate cyclase 9, Pde4d - phosphodiesterase 4d, camp-specific, Gnas - gnas complex locus, Pln - phospholamban, Adra1d - adrenoceptor alpha 1d]	BP	DOWN
GO:0001542	ovulation from ovarian follicle	0.000487	0.0129	3.13	9959	10	2546	8	[Lepr - leptin receptor, Mmp2 - matrix metallopeptidase 2, Foxo3 - forkhead box o3, Nos3 - nitric oxide synthase 3, endothelial cell, Adamts1 - adam metallopeptidase with thrombospondin type 1 motif, 1, Pla2g4a - phospholipase a2, group iva (cytosolic, calcium-dependent), Sirt1 - sirtuin 1, Pgr - progesterone receptor]	BP	DOWN
GO:0045161	neuronal ion channel clustering	0.000487	0.0129	3.13	9959	10	2546	8	[Kcnip2 - kv channel-interacting protein 2, Cntn2 - contactin 2 (axonal), Myoc - myocilin, trabecular meshwork inducible glucocorticoid response, Sclt1 - sodium channel and clathrin linker 1, Dlg2 - discs, large homolog 2 (drosophila), Nfasc - neurofascin, Nlgn1 - neuroligin 1, Pmp22 - peripheral myelin protein 22]	BP	DOWN
GO:0060033	anatomical structure regression	0.000487	0.0128	3.13	9959	10	2546	8	[Gli2 - gli family zinc finger 2, Gli1 - gli family zinc finger 1, Spi1 - spleen focus forming virus (sffv) proviral integration oncogene, Amh - anti-mullerian hormone, Bmpr1a - bone morphogenetic protein receptor, type ia, Lrp5 - low density lipoprotein receptor-related protein 5, Ninj1 - ninjurin 1, Smad9 - smad family member 9]	BP	DOWN
GO:1905153	regulation of membrane invagination	0.000487	0.0128	3.13	9959	10	2546	8	[Nckap1l - nck associated protein 1 like, Cd300a - cd300a molecule, Fcgr1a - fc fragment of igg, high affinity ia, receptor (cd64), Syt11 - synaptotagmin xi, Stap1 - signal transducing adaptor family member 1, C3 - complement component 3, Lbp - lipopolysaccharide binding protein, Siglec8 - sialic acid binding ig-like lectin 8]	BP	DOWN
GO:0043405	regulation of MAP kinase activity	0.000489	0.0128	1.4	9959	215	2546	77	[Dusp4 - dual specificity phosphatase 4, Ptk2b - protein tyrosine kinase 2 beta, Ghr - growth hormone receptor, Fgd4 - fyve, rhogef and ph domain containing 4, Dusp1 - dual specificity phosphatase 1, Ptprj - protein tyrosine phosphatase, receptor type, j, Il1rn - interleukin 1 receptor antagonist, Pik3cg - phosphatidylinositol-4,5-bisphosphate 3-kinase, catalytic subunit gamma, Cspg4 - chondroiti…	BP	DOWN
GO:0051897	positive regulation of protein kinase B signaling	0.000496	0.013	1.73	9959	70	2546	31	[Igf2 - insulin-like growth factor 2, Igf1 - insulin-like growth factor 1, Ngfr - nerve growth factor receptor, Ptprj - protein tyrosine phosphatase, receptor type, j, Phlpp1 - ph domain and leucine rich repeat protein phosphatase 1, Sema5a - sema domain, seven thrombospondin repeats (type 1 and type 1-like), transmembrane domain (tm) and short cytoplasmic domain, (semaphorin) 5a, Rasd2 - rasd fa…	BP	DOWN
GO:0051150	regulation of smooth muscle cell differentiation	0.000497	0.013	2.26	9959	26	2546	15	[Rbpms2 - rna binding protein with multiple splicing 2, Smarcd3 - swi/snf related, matrix associated, actin dependent regulator of chromatin, subfamily d, member 3, Nfatc1 - nuclear factor of activated t-cells, cytoplasmic, calcineurin-dependent 1, Foxo4 - forkhead box o4, Olfm2 - olfactomedin 2, Zeb1 - zinc finger e-box binding homeobox 1, Sod2 - superoxide dismutase 2, mitochondrial, Nfatc2 - n…	BP	DOWN
GO:0002695	negative regulation of leukocyte activation	0.000498	0.013	1.6	9959	100	2546	41	[Tnfaip8l2 - tumor necrosis factor, alpha-induced protein 8-like 2, Hlx - h2.0-like homeobox, Peli1 - pellino e3 ubiquitin protein ligase 1, Kng1 - kininogen 1, Cd74 - cd74 molecule, major histocompatibility complex, class ii invariant chain, Socs1 - suppressor of cytokine signaling 1, Tnfrsf21 - tumor necrosis factor receptor superfamily, member 21, LOC679811 - similar to riken cdna d930015e06, …	BP	DOWN
GO:0098900	regulation of action potential	0.000499	0.013	2.01	9959	39	2546	20	[Fgf13 - fibroblast growth factor 13, Kcnb1 - potassium voltage gated channel, shab-related subfamily, member 1, Ank2 - ankyrin 2, neuronal, Ryr2 - ryanodine receptor 2, cardiac, Rapgef4 - rap guanine nucleotide exchange factor (gef) 4, Atp2a2 - atpase, ca++ transporting, cardiac muscle, slow twitch 2, Rnf207 - ring finger protein 207, Ctnna3 - catenin (cadherin associated protein), alpha 3, Flna…	BP	DOWN
GO:0010038	response to metal ion	0.000513	0.0134	1.33	9959	299	2546	102	[Acadm - acyl-coa dehydrogenase, c-4 to c-12 straight chain, Dnmt3a - dna (cytosine-5-)-methyltransferase 3 alpha, Nos3 - nitric oxide synthase 3, endothelial cell, Asph - aspartate-beta-hydroxylase, Nos1 - nitric oxide synthase 1, neuronal, Tnnc1 - troponin c type 1 (slow), Apobec1 - apolipoprotein b mrna editing enzyme, catalytic polypeptide 1, Vcam1 - vascular cell adhesion molecule 1, Mt1a - …	BP	DOWN
GO:0070665	positive regulation of leukocyte proliferation	0.000517	0.0134	1.68	9959	79	2546	34	[Igf2 - insulin-like growth factor 2, Nckap1l - nck associated protein 1 like, Igf1 - insulin-like growth factor 1, Hes1 - hairy and enhancer of split 1 (drosophila), Peli1 - pellino e3 ubiquitin protein ligase 1, Pnp - purine nucleoside phosphorylase, Cd74 - cd74 molecule, major histocompatibility complex, class ii invariant chain, Il13ra1 - interleukin 13 receptor, alpha 1, Ptprc - protein tyro…	BP	DOWN
GO:0045667	regulation of osteoblast differentiation	0.000518	0.0134	1.64	9959	88	2546	37	[Gli1 - gli family zinc finger 1, Igf1 - insulin-like growth factor 1, Nfatc1 - nuclear factor of activated t-cells, cytoplasmic, calcineurin-dependent 1, Gdpd2 - glycerophosphodiester phosphodiesterase domain containing 2, Ranbp3l - ran binding protein 3-like, Zhx3 - zinc fingers and homeoboxes 3, Gdf10 - growth differentiation factor 10, Gnas - gnas complex locus, Cebpb - ccaat/enhancer binding…	BP	DOWN
GO:0001676	long-chain fatty acid metabolic process	0.000565	0.0146	1.96	9959	42	2546	21	[Pnpla3 - patatin-like phospholipase domain containing 3, Slc27a1 - solute carrier family 27 (fatty acid transporter), member 1, Alox12 - arachidonate 12-lipoxygenase, Ptgs2 - prostaglandin-endoperoxide synthase 2, Pla2g4a - phospholipase a2, group iva (cytosolic, calcium-dependent), Asah2 - n-acylsphingosine amidohydrolase (non-lysosomal ceramidase) 2, Alox5 - arachidonate 5-lipoxygenase, Pnpla8…	BP	DOWN
GO:0048747	muscle fiber development	0.000565	0.0146	1.96	9959	42	2546	21	[Dmd - dystrophin, Myom1 - myomesin 1, Wfikkn2 - wap, follistatin/kazal, immunoglobulin, kunitz and netrin domain containing 2, Ski - v-ski avian sarcoma viral oncogene homolog, Comp - cartilage oligomeric matrix protein, Neb - nebulin, Cav2 - caveolin 2, Pmp22 - peripheral myelin protein 22, Fam65b - family with sequence similarity 65, member b, Cacnb4 - calcium channel, voltage-dependent, beta …	BP	DOWN
GO:0050850	positive regulation of calcium-mediated signaling	0.000577	0.0149	2.07	9959	34	2546	18	[Jph2 - junctophilin 2, Itgal - integrin, alpha l, Igf1 - insulin-like growth factor 1, P2ry6 - pyrimidinergic receptor p2y, g-protein coupled, 6, Ccl4 - chemokine (c-c motif) ligand 4, Pkd2 - polycystic kidney disease 2 (autosomal dominant), Lmcd1 - lim and cysteine-rich domains 1, Kdr - kinase insert domain receptor, Trdn - triadin, Cd4 - cd4 molecule, Trem2 - triggering receptor expressed on m…	BP	DOWN
GO:0007566	embryo implantation	0.000577	0.0148	2.07	9959	34	2546	18	[Klf9 - kruppel-like factor 9, Ptgis - prostaglandin i2 (prostacyclin) synthase, H3f3b - h3 histone, family 3b, Ptgs2 - prostaglandin-endoperoxide synthase 2, Serpine2 - serpin peptidase inhibitor, clade e (nexin, plasminogen activator inhibitor type 1), member 2, Igfbp7 - insulin-like growth factor binding protein 7, Fbln1 - fibulin 1, Stc1 - stanniocalcin 1, Mmp2 - matrix metallopeptidase 2, Gg…	BP	DOWN
GO:1901380	negative regulation of potassium ion transmembrane transport	0.000597	0.0153	2.47	9959	19	2546	12	[Rgs4 - regulator of g-protein signaling 4, Agrn - agrin, Kcnh2 - potassium voltage-gated channel, subfamily h (eag-related), member 2, Oxsr1 - oxidative-stress responsive 1, Kcne4 - potassium voltage-gated channel, isk-related family, member 4, Ank3 - ankyrin 3, node of ranvier (ankyrin g), Kcne1 - potassium voltage-gated channel, isk-related family, member 1, Ptger3 - prostaglandin e receptor 3…	BP	DOWN
GO:0030183	B cell differentiation	0.000624	0.016	1.91	9959	45	2546	22	[Ptk2b - protein tyrosine kinase 2 beta, Nfatc1 - nuclear factor of activated t-cells, cytoplasmic, calcineurin-dependent 1, Dnajb9 - dnaj (hsp40) homolog, subfamily b, member 9, Ep300 - e1a binding protein p300, Itm2a - integral membrane protein 2a, Polm - polymerase (dna directed), mu, Ptprj - protein tyrosine phosphatase, receptor type, j, Ptprc - protein tyrosine phosphatase, receptor type, c…	BP	DOWN
GO:0045600	positive regulation of fat cell differentiation	0.000624	0.016	1.91	9959	45	2546	22	[Mecom - mds1 and evi1 complex locus, Igf1 - insulin-like growth factor 1, Bmp2 - bone morphogenetic protein 2, Fndc5 - fibronectin type iii domain containing 5, Crebl2 - camp responsive element binding protein-like 2, Lrp5 - low density lipoprotein receptor-related protein 5, Ptgs2 - prostaglandin-endoperoxide synthase 2, Wnt5b - wingless-type mmtv integration site family, member 5b, Cebpb - cca…	BP	DOWN
GO:0048709	oligodendrocyte differentiation	0.000639	0.0163	2.16	9959	29	2546	16	[Sox8 - sry (sex determining region y)-box 8, Ptprj - protein tyrosine phosphatase, receptor type, j, Nkx6-1 - nk6 homeobox 1, Tspan2 - tetraspanin 2, Trpc4 - transient receptor potential cation channel, subfamily c, member 4, Nlgn3 - neuroligin 3, Egr1 - early growth response 1, Bcl2 - b-cell cll/lymphoma 2, Apoe - apolipoprotein e, Slc8a3 - solute carrier family 8 (sodium/calcium exchanger), me…	BP	DOWN
GO:2001023	regulation of response to drug	0.000642	0.0164	1.75	9959	65	2546	29	[Hsph1 - heat shock 105/110 protein 1, Rgs4 - regulator of g-protein signaling 4, Foxo3 - forkhead box o3, Gdnf - glial cell derived neurotrophic factor, Hspa8 - heat shock 70kda protein 8, Syt11 - synaptotagmin xi, Slc36a2 - solute carrier family 36 (proton/amino acid symporter), member 2, Stk39 - serine threonine kinase 39, Adora2a - adenosine a2a receptor, Arg2 - arginase 2, Gabra4 - gamma-ami…	BP	DOWN
GO:2000403	positive regulation of lymphocyte migration	0.000658	0.0167	2.28	9959	24	2546	14	[Ptk2b - protein tyrosine kinase 2 beta, Ccl4 - chemokine (c-c motif) ligand 4, Ccl21 - chemokine (c-c motif) ligand 21, Ccl27 - chemokine (c-c motif) ligand 27, Cxcl14 - chemokine (c-x-c motif) ligand 14, Dock8 - dedicator of cytokinesis 8, Oxsr1 - oxidative-stress responsive 1, Adam17 - adam metallopeptidase domain 17, Itgb3 - integrin, beta 3, Ccl3 - chemokine (c-c motif) ligand 3, Aif1 - allo…	BP	DOWN
GO:0050819	negative regulation of coagulation	0.000658	0.0167	2.28	9959	24	2546	14	[Kng1 - kininogen 1, Cd34 - cd34 molecule, Alox12 - arachidonate 12-lipoxygenase, Serpine2 - serpin peptidase inhibitor, clade e (nexin, plasminogen activator inhibitor type 1), member 2, Cd9 - cd9 molecule, Serping1 - serpin peptidase inhibitor, clade g (c1 inhibitor), member 1, Apoe - apolipoprotein e, Plg - plasminogen, Ptger3 - prostaglandin e receptor 3 (subtype ep3), Adtrp - androgen-depend…	BP	DOWN
GO:0045766	positive regulation of angiogenesis	0.000665	0.0169	1.53	9959	123	2546	48	[Igf2 - insulin-like growth factor 2, Ptk2b - protein tyrosine kinase 2 beta, Aqp1 - aquaporin 1, Aplnr - apelin receptor, Ptgis - prostaglandin i2 (prostacyclin) synthase, Acvrl1 - activin a receptor type ii-like 1, Nos3 - nitric oxide synthase 3, endothelial cell, C5ar1 - complement component 5a receptor 1, Cxcr4 - chemokine (c-x-c motif) receptor 4, Cd34 - cd34 molecule, Hspb1 - heat shock pro…	BP	DOWN
GO:0048514	blood vessel morphogenesis	0.000667	0.0169	1.71	9959	71	2546	31	[Itga7 - integrin, alpha 7, Acvrl1 - activin a receptor type ii-like 1, Hes1 - hairy and enhancer of split 1 (drosophila), Setd2 - set domain containing 2, Comp - cartilage oligomeric matrix protein, Col4a1 - collagen, type iv, alpha 1, Chd7 - chromodomain helicase dna binding protein 7, Adamts9 - adam metallopeptidase with thrombospondin type 1 motif, 9, Sgcd - sarcoglycan, delta (dystrophin-ass…	BP	DOWN
GO:0048771	tissue remodeling	0.000667	0.0169	1.71	9959	71	2546	31	[Igf1 - insulin-like growth factor 1, Ltbp3 - latent transforming growth factor beta binding protein 3, Acvrl1 - activin a receptor type ii-like 1, Nos3 - nitric oxide synthase 3, endothelial cell, Chd7 - chromodomain helicase dna binding protein 7, Wnt16 - wingless-type mmtv integration site family, member 16, Il23a - interleukin 23, alpha subunit p19, Tgm2 - transglutaminase 2, c polypeptide, P…	BP	DOWN
GO:0010830	regulation of myotube differentiation	0.000672	0.017	2.01	9959	37	2546	19	[Bai1 - brain-specific angiogenesis inhibitor 1, Cd53 - cd53 molecule, Rbm24 - rna binding motif protein 24, Thra - thyroid hormone receptor alpha, Sik1 - salt-inducible kinase 1, Fam65b - family with sequence similarity 65, member b, Gdf15 - growth differentiation factor 15, Nfatc2 - nuclear factor of activated t-cells, cytoplasmic, calcineurin-dependent 2, Bcl2 - b-cell cll/lymphoma 2, Trim72 -…	BP	DOWN
GO:0034103	regulation of tissue remodeling	0.000678	0.0171	1.87	9959	48	2546	23	[Fcgr3a - fc fragment of igg, low affinity iiia, receptor, Lepr - leptin receptor, Ltbp3 - latent transforming growth factor beta binding protein 3, Erg - v-ets avian erythroblastosis virus e26 oncogene, Tnfrsf11b - tumor necrosis factor receptor superfamily, member 11b, Lrp5 - low density lipoprotein receptor-related protein 5, Bcr - breakpoint cluster region, Rock1 - rho-associated coiled-coil …	BP	DOWN
GO:0071674	mononuclear cell migration	0.00076	0.0191	2.53	9959	17	2546	11	[Ccl6 - chemokine (c-c motif) ligand 6, Cx3cl1 - chemokine (c-x3-c motif) ligand 1, Ptpro - protein tyrosine phosphatase, receptor type, o, Ccl4 - chemokine (c-c motif) ligand 4, Plg - plasminogen, Ccl21 - chemokine (c-c motif) ligand 21, Ccl3 - chemokine (c-c motif) ligand 3, Ccl2 - chemokine (c-c motif) ligand 2, Pdgfb - platelet-derived growth factor beta polypeptide, Ccl19 - chemokine (c-c mo…	BP	DOWN
GO:0060314	regulation of ryanodine-sensitive calcium-release channel activity	0.00076	0.0191	2.53	9959	17	2546	11	[Trdn - triadin, Jph3 - junctophilin 3, Jph2 - junctophilin 2, Dmd - dystrophin, Pkd2 - polycystic kidney disease 2 (autosomal dominant), Hrc - histidine rich calcium binding protein, Akap6 - a kinase (prka) anchor protein 6, Gstm7 - glutathione s-transferase, mu 7, Pde4d - phosphodiesterase 4d, camp-specific, Casq2 - calsequestrin 2 (cardiac muscle), Pln - phospholamban]	BP	DOWN
GO:0050766	positive regulation of phagocytosis	0.00076	0.019	1.96	9959	40	2546	20	[Nckap1l - nck associated protein 1 like, C4b - complement component 4b (chido blood group), Bcr - breakpoint cluster region, Ccl2 - chemokine (c-c motif) ligand 2, Ptprj - protein tyrosine phosphatase, receptor type, j, Ptprc - protein tyrosine phosphatase, receptor type, c, Hspa8 - heat shock 70kda protein 8, Dock2 - dedicator of cytokinesis 2, Fcgr2b - fc fragment of igg, low affinity iib, rec…	BP	DOWN
GO:0045944	positive regulation of transcription by RNA polymerase II	0.000765	0.0191	1.2	9959	742	2546	227	[Ikzf4 - ikaros family zinc finger 4, Ppp1r12a - protein phosphatase 1, regulatory subunit 12a, Creb5 - camp responsive element binding protein 5, Taf7 - taf7 rna polymerase ii, tata box binding protein (tbp)-associated factor, Nr1d1 - nuclear receptor subfamily 1, group d, member 1, Glp1r - glucagon-like peptide 1 receptor, Foxo1 - forkhead box o1, Bcl3 - b-cell cll/lymphoma 3, Ppard - peroxisom…	BP	DOWN
GO:0033628	regulation of cell adhesion mediated by integrin	0.000776	0.0194	2.08	9959	32	2546	17	[Nckap1l - nck associated protein 1 like, Ccl21 - chemokine (c-c motif) ligand 21, Rac3 - ras-related c3 botulinum toxin substrate 3 (rho family, small gtp binding protein rac3), Tesc - tescalcin, Foxc2 - forkhead box c2, Podxl - podocalyxin-like, Acer2 - alkaline ceramidase 2, Fermt1 - fermitin family member 1, Sfrp2 - secreted frizzled-related protein 2, Lpxn - leupaxin, P2ry12 - purinergic rec…	BP	DOWN
GO:0043279	response to alkaloid	0.000785	0.0195	1.56	9959	105	2546	42	[Ptk2b - protein tyrosine kinase 2 beta, Adcy5 - adenylate cyclase 5, Rgs4 - regulator of g-protein signaling 4, Igf1 - insulin-like growth factor 1, Dnmt3a - dna (cytosine-5-)-methyltransferase 3 alpha, Hes1 - hairy and enhancer of split 1 (drosophila), Ghr - growth hormone receptor, Cxcr4 - chemokine (c-x-c motif) receptor 4, Ppp1r15a - protein phosphatase 1, regulatory subunit 15a, Prkcg - pro…	BP	DOWN
GO:0043067	regulation of programmed cell death	0.000804	0.02	1.16	9959	1033	2546	307	[Cdk5r1 - cyclin-dependent kinase 5, regulatory subunit 1 (p35), Cxcr4 - chemokine (c-x-c motif) receptor 4, Ppp2r1b - protein phosphatase 2, regulatory subunit a, beta, Gdf10 - growth differentiation factor 10, Il1rn - interleukin 1 receptor antagonist, Csf1r - colony stimulating factor 1 receptor, Fcgr2b - fc fragment of igg, low affinity iib, receptor (cd32), Ntrk2 - neurotrophic tyrosine kina…	BP	DOWN
GO:0042129	regulation of T cell proliferation	0.00082	0.0204	1.58	9959	99	2546	40	[Igf2 - insulin-like growth factor 2, Nckap1l - nck associated protein 1 like, Igf1 - insulin-like growth factor 1, Hes1 - hairy and enhancer of split 1 (drosophila), Peli1 - pellino e3 ubiquitin protein ligase 1, Kng1 - kininogen 1, Pnp - purine nucleoside phosphorylase, Tnfrsf21 - tumor necrosis factor receptor superfamily, member 21, LOC679811 - similar to riken cdna d930015e06, Ptprc - protei…	BP	DOWN
GO:0050730	regulation of peptidyl-tyrosine phosphorylation	0.000829	0.0205	1.44	9959	169	2546	62	[Hsph1 - heat shock 105/110 protein 1, Ptk2b - protein tyrosine kinase 2 beta, Ghr - growth hormone receptor, Prkcz - protein kinase c, zeta, Socs1 - suppressor of cytokine signaling 1, Ptprj - protein tyrosine phosphatase, receptor type, j, Il23a - interleukin 23, alpha subunit p19, Csf1r - colony stimulating factor 1 receptor, Hcls1 - hematopoietic cell specific lyn substrate 1, Dlg3 - discs, l…	BP	DOWN
GO:0014068	positive regulation of phosphatidylinositol 3-kinase signaling	0.00084	0.0208	1.91	9959	43	2546	21	[Erbb4 - v-erb-b2 avian erythroblastic leukemia viral oncogene 4, Plxnb1 - plexin b1, Igf1 - insulin-like growth factor 1, Ntrk3 - neurotrophic tyrosine kinase, receptor, type 3, Osm - oncostatin m, Insr - insulin receptor, Fgr - feline gardner-rasheed sarcoma viral oncogene, Wnt16 - wingless-type mmtv integration site family, member 16, Kdr - kinase insert domain receptor, Hcls1 - hematopoietic …	BP	DOWN
GO:0050954	sensory perception of mechanical stimulus	0.000852	0.021	1.74	9959	63	2546	28	[Usp53 - ubiquitin specific peptidase 53, Fbxo11 - f-box protein 11, Kcnq4 - potassium voltage-gated channel, kqt-like subfamily, member 4, Diaph1 - diaphanous-related formin 1, Chd7 - chromodomain helicase dna binding protein 7, Lrig1 - leucine-rich repeats and immunoglobulin-like domains 1, Tbl1x - transducin (beta)-like 1 x-linked, Nav2 - neuron navigator 2, Ror1 - receptor tyrosine kinase-lik…	BP	DOWN
GO:0035019	somatic stem cell population maintenance	0.000855	0.0211	2.17	9959	27	2546	15	[Braf - v-raf murine sarcoma viral oncogene homolog b, Bcl9l - b-cell cll/lymphoma 9-like, Hes1 - hairy and enhancer of split 1 (drosophila), Klf10 - kruppel-like factor 10, Ski - v-ski avian sarcoma viral oncogene homolog, Lrp5 - low density lipoprotein receptor-related protein 5, Kat6a - k(lysine) acetyltransferase 6a, Zhx2 - zinc fingers and homeoboxes 2, Spi1 - spleen focus forming virus (sff…	BP	DOWN
GO:0051962	positive regulation of nervous system development	0.000862	0.0212	1.27	9959	396	2546	129	[Magi2 - membrane associated guanylate kinase, ww and pdz domain containing 2, Gli2 - gli family zinc finger 2, Cbln2 - cerebellin 2 precursor, Cxcr4 - chemokine (c-x-c motif) receptor 4, Ngfr - nerve growth factor receptor, Sema5a - sema domain, seven thrombospondin repeats (type 1 and type 1-like), transmembrane domain (tm) and short cytoplasmic domain, (semaphorin) 5a, Nlgn3 - neuroligin 3, Nt…	BP	DOWN
GO:0051250	negative regulation of lymphocyte activation	0.000863	0.0212	1.61	9959	90	2546	37	[Tnfaip8l2 - tumor necrosis factor, alpha-induced protein 8-like 2, Hlx - h2.0-like homeobox, Peli1 - pellino e3 ubiquitin protein ligase 1, Kng1 - kininogen 1, Socs1 - suppressor of cytokine signaling 1, Cd74 - cd74 molecule, major histocompatibility complex, class ii invariant chain, Lag3 - lymphocyte-activation gene 3, Tnfrsf21 - tumor necrosis factor receptor superfamily, member 21, LOC679811…	BP	DOWN
GO:0032355	response to estradiol	0.000866	0.0212	1.44	9959	166	2546	61	[Dnmt3a - dna (cytosine-5-)-methyltransferase 3 alpha, Nos3 - nitric oxide synthase 3, endothelial cell, Ghr - growth hormone receptor, Socs1 - suppressor of cytokine signaling 1, Dusp1 - dual specificity phosphatase 1, Adcyap1r1 - adenylate cyclase activating polypeptide 1 receptor 1, Pam - peptidylglycine alpha-amidating monooxygenase, Fcgr2b - fc fragment of igg, low affinity iib, receptor (cd…	BP	DOWN
GO:0060079	excitatory postsynaptic potential	0.00087	0.0213	2.31	9959	22	2546	13	[Mpp2 - membrane protein, palmitoylated 2 (maguk p55 subfamily member 2), P2rx5 - purinergic receptor p2x, ligand-gated ion channel, 5, Ppp1r9a - protein phosphatase 1, regulatory subunit 9a, Slc29a1 - solute carrier family 29 (equilibrative nucleoside transporter), member 1, Nlgn3 - neuroligin 3, Mef2c - myocyte enhancer factor 2c, Trpv1 - transient receptor potential cation channel, subfamily v…	BP	DOWN
GO:0045661	regulation of myoblast differentiation	0.000906	0.0221	2.01	9959	35	2546	18	[Ranbp3l - ran binding protein 3-like, Sox8 - sry (sex determining region y)-box 8, Zfhx3 - zinc finger homeobox 3, Boc - boc cell adhesion associated, oncogene regulated, Plcb1 - phospholipase c, beta 1 (phosphoinositide-specific), Cxcl14 - chemokine (c-x-c motif) ligand 14, Fam65b - family with sequence similarity 65, member b, Nmrk2 - nicotinamide riboside kinase 2, Mef2c - myocyte enhancer fa…	BP	DOWN
GO:0008284	positive regulation of cell proliferation	0.000934	0.0228	1.22	9959	594	2546	185	[Gli1 - gli family zinc finger 1, Gli2 - gli family zinc finger 2, C5ar1 - complement component 5a receptor 1, Ngfr - nerve growth factor receptor, Atf3 - activating transcription factor 3, Il13ra1 - interleukin 13 receptor, alpha 1, Coro1a - coronin, actin binding protein 1a, Sema5a - sema domain, seven thrombospondin repeats (type 1 and type 1-like), transmembrane domain (tm) and short cytoplas…	BP	DOWN
GO:0001817	regulation of cytokine production	0.000936	0.0228	1.28	9959	369	2546	121	[C5ar1 - complement component 5a receptor 1, Arid5a - at rich interactive domain 5a (mrf1 like), Socs1 - suppressor of cytokine signaling 1, Ptprj - protein tyrosine phosphatase, receptor type, j, Lag3 - lymphocyte-activation gene 3, Il1rn - interleukin 1 receptor antagonist, Il23a - interleukin 23, alpha subunit p19, Csf1r - colony stimulating factor 1 receptor, Fcgr2b - fc fragment of igg, low …	BP	DOWN
GO:0006869	lipid transport	0.000937	0.0228	1.49	9959	131	2546	50	[Apold1 - apolipoprotein l domain containing 1, Mfsd2a - major facilitator superfamily domain containing 2a, Gramd1c - gram domain containing 1c, Osbpl3 - oxysterol binding protein-like 3, Proca1 - protein interacting with cyclin a1, Scarb2 - scavenger receptor class b, member 2, Abcg4 - atp-binding cassette, subfamily g (white), member 4, Atp11c - atpase, class vi, type 11c, Apol9a - apolipoprot…	BP	DOWN
GO:0002521	leukocyte differentiation	0.000941	0.0228	1.42	9959	173	2546	63	[Ptk2b - protein tyrosine kinase 2 beta, Jag2 - jagged 2, Nfatc1 - nuclear factor of activated t-cells, cytoplasmic, calcineurin-dependent 1, Gpc3 - glypican 3, Ep300 - e1a binding protein p300, Chd7 - chromodomain helicase dna binding protein 7, Ptprj - protein tyrosine phosphatase, receptor type, j, Dock11 - dedicator of cytokinesis 11, Coro1a - coronin, actin binding protein 1a, Rsad2 - radica…	BP	DOWN
GO:0030204	chondroitin sulfate metabolic process	0.000953	0.0231	2.61	9959	15	2546	10	[Dsel - dermatan sulfate epimerase-like, Xylt1 - xylosyltransferase 1, Impad1 - inositol monophosphatase domain containing 1, Chst3 - carbohydrate (chondroitin 6) sulfotransferase 3, Bgn - biglycan, Egflam - egf-like, fibronectin type iii and laminin g domains, Spock2 - sparc/osteonectin, cwcv and kazal-like domains proteoglycan (testican) 2, Chst12 - carbohydrate (chondroitin 4) sulfotransferase…	BP	DOWN
GO:0019369	arachidonic acid metabolic process	0.000953	0.023	2.61	9959	15	2546	10	[Sphk1 - sphingosine kinase 1, Alox12 - arachidonate 12-lipoxygenase, Cyp2c22 - cytochrome p450, family 2, subfamily c, polypeptide 22, Pla2g4a - phospholipase a2, group iva (cytosolic, calcium-dependent), Ptgs2 - prostaglandin-endoperoxide synthase 2, Mgll - monoglyceride lipase, Cyp2d4 - cytochrome p450, family 2, subfamily d, polypeptide 4, Alox5 - arachidonate 5-lipoxygenase, Cyp2d1 - cytochr…	BP	DOWN
GO:0051047	positive regulation of secretion	0.000954	0.023	1.34	9959	263	2546	90	[Aqp1 - aquaporin 1, Exph5 - exophilin 5, Cacna1h - calcium channel, voltage-dependent, t type, alpha 1h subunit, Arid5a - at rich interactive domain 5a (mrf1 like), Ep300 - e1a binding protein p300, Prkcz - protein kinase c, zeta, Blk - b lymphoid tyrosine kinase, Nkx6-1 - nk6 homeobox 1, Csf1r - colony stimulating factor 1 receptor, Oxct1 - 3-oxoacid coa transferase 1, Trpv1 - transient recepto…	BP	DOWN
GO:0044815	DNA packaging complex	2.07e-18	3.74e-15	3.44	9570	57	2148	44	[Hist1h2bd - histone cluster 1, h2bd, H1fx - h1 histone family, member x, Hist1h2bh - histone cluster 1, h2bh, Hist1h1b - histone cluster 1, h1b, Hist1h2ao - histone cluster 1, h2ao, Hist1h2ac - histone cluster 1, h2ac, Hist1h2bl - histone cluster 1, h2bl, Hist1h1a - histone cluster 1, h1a, Ncapg2 - non-smc condensin ii complex, subunit g2, Hist1h2bk - histone cluster 1, h2bk, Hist1h2bo - histone…	CC	UP
GO:0031224	intrinsic component of membrane	8.62e-18	7.81e-15	1.32	9570	2016	2148	598	[Fgfr3 - fibroblast growth factor receptor 3, Dagla - diacylglycerol lipase, alpha, Itpr3 - inositol 1,4,5-trisphosphate receptor, type 3, Grm8 - glutamate receptor, metabotropic 8, Hmgcr - 3-hydroxy-3-methylglutaryl-coa reductase, Unc5b - unc-5 homolog b (c. elegans), Rhbdl2 - rhomboid, veinlet-like 2 (drosophila), Epha7 - eph receptor a7, Cd38 - cd38 molecule, Has2 - hyaluronan synthase 2, Vldl…	CC	UP
GO:0016021	integral component of membrane	4.95e-17	2.99e-14	1.32	9570	1962	2148	581	[Fgfr3 - fibroblast growth factor receptor 3, Dagla - diacylglycerol lipase, alpha, Itpr3 - inositol 1,4,5-trisphosphate receptor, type 3, Grm8 - glutamate receptor, metabotropic 8, Hmgcr - 3-hydroxy-3-methylglutaryl-coa reductase, Unc5b - unc-5 homolog b (c. elegans), Epha7 - eph receptor a7, Rhbdl2 - rhomboid, veinlet-like 2 (drosophila), Cd38 - cd38 molecule, Has2 - hyaluronan synthase 2, Vldl…	CC	UP
GO:0000786	nucleosome	3.86e-15	1.75e-12	3.36	9570	49	2148	37	[Hist1h2bd - histone cluster 1, h2bd, H1fx - h1 histone family, member x, Hist1h2bh - histone cluster 1, h2bh, Hist1h1b - histone cluster 1, h1b, Hist1h2ao - histone cluster 1, h2ao, Hist1h2ac - histone cluster 1, h2ac, Hist1h2bl - histone cluster 1, h2bl, Hist1h2bk - histone cluster 1, h2bk, Hist1h1a - histone cluster 1, h1a, Hist1h2bo - histone cluster 1, h2bo, Hist1h4m - histone cluster 1, h4m…	CC	UP
GO:0044459	plasma membrane part	3.18e-13	1.15e-10	1.39	9570	1103	2148	345	[Fgfr3 - fibroblast growth factor receptor 3, Grm8 - glutamate receptor, metabotropic 8, Itpr3 - inositol 1,4,5-trisphosphate receptor, type 3, Dagla - diacylglycerol lipase, alpha, Ncstn - nicastrin, Ada - adenosine deaminase, Lmo7 - lim domain 7, Epha7 - eph receptor a7, Gja3 - gap junction protein, alpha 3, Lrp8 - low density lipoprotein receptor-related protein 8, apolipoprotein e receptor, C…	CC	UP
GO:0044425	membrane part	1.35e-10	4.08e-08	1.18	9570	2942	2148	781	[Grm8 - glutamate receptor, metabotropic 8, Unc5b - unc-5 homolog b (c. elegans), Ada - adenosine deaminase, Rhbdl2 - rhomboid, veinlet-like 2 (drosophila), Epha7 - eph receptor a7, Cntnap2 - contactin associated protein-like 2, Agtr1a - angiotensin ii receptor, type 1a, Cttn - cortactin, Flrt3 - fibronectin leucine rich transmembrane protein 3, Antxr2 - anthrax toxin receptor 2, Slc31a1 - solute…	CC	UP
- microtubule associated serine/threonine kinase-like, Slc25a1 - solute carrier family 25 (mitochondrial carrier, citrate transporter), member 1, Cisd2 - cdgsh iron sulfur domain 2, March3 - membrane-associated ring finger (c3hc4) 3, e3 ubiquitin protein ligase, Sema3a - sema domain, immunoglobulin domain (ig), short basic domain, secreted, (semaphorin) 3a, Ndst3 - n-deacetylase/n-sulfotransferas…										CC	UP
GO:0031226	intrinsic component of plasma membrane	2.88e-10	7.45e-08	1.63	9570	370	2148	135	[Fgfr3 - fibroblast growth factor receptor 3, Sgms2 - sphingomyelin synthase 2, Dagla - diacylglycerol lipase, alpha, Grm8 - glutamate receptor, metabotropic 8, Itpr3 - inositol 1,4,5-trisphosphate receptor, type 3, Gpnmb - glycoprotein (transmembrane) nmb, Ncstn - nicastrin, Epha7 - eph receptor a7, Pcdhga1 - protocadherin gamma subfamily a, 1, Has2 - hyaluronan synthase 2, Abcc3 - atp-binding c…	CC	UP
GO:0005887	integral component of plasma membrane	1.45e-09	3.28e-07	1.63	9570	336	2148	123	[Fgfr3 - fibroblast growth factor receptor 3, Sgms2 - sphingomyelin synthase 2, Dagla - diacylglycerol lipase, alpha, Grm8 - glutamate receptor, metabotropic 8, Itpr3 - inositol 1,4,5-trisphosphate receptor, type 3, Gpnmb - glycoprotein (transmembrane) nmb, Ncstn - nicastrin, Epha7 - eph receptor a7, Pcdhga1 - protocadherin gamma subfamily a, 1, Has2 - hyaluronan synthase 2, Abcc3 - atp-binding c…	CC	UP
GO:0005615	extracellular space	4.74e-09	9.54e-07	1.51	9570	463	2148	157	[Anxa2 - annexin a2, Ccs - copper chaperone for superoxide dismutase, LOC290595 - hypothetical gene supported by af152002, Ctsz - cathepsin z, Ada - adenosine deaminase, Tgfb2 - transforming growth factor, beta 2, Il15 - interleukin 15, Lrp8 - low density lipoprotein receptor-related protein 8, apolipoprotein e receptor, Lif - leukemia inhibitory factor, Clec11a - c-type lectin domain family 11, …	CC	UP
GO:0032993	protein-DNA complex	3.2e-08	5.79e-06	2.06	9570	108	2148	50	[Hist1h2bd - histone cluster 1, h2bd, H1fx - h1 histone family, member x, Hist1h2bh - histone cluster 1, h2bh, Hist1h2ao - histone cluster 1, h2ao, Hist1h2ac - histone cluster 1, h2ac, Hist1h2bk - histone cluster 1, h2bk, LOC684828 - similar to histone h1.2 (h1 var.1) (h1c), LOC100364835 - histone cluster 1, h2bd-like, Hist2h4 - histone cluster 2, h4, Tcf7l2 - transcription factor 7-like 2 (t-cel…	CC	UP
GO:0044421	extracellular region part	4.46e-08	7.34e-06	1.4	9570	630	2148	198	[Ccs - copper chaperone for superoxide dismutase, Ctsz - cathepsin z, Gbp2 - guanylate binding protein 2, interferon-inducible, Ada - adenosine deaminase, Il15 - interleukin 15, Lrp8 - low density lipoprotein receptor-related protein 8, apolipoprotein e receptor, Lif - leukemia inhibitory factor, Ctsl1 - cathepsin l1, Pltp - phospholipid transfer protein, Vldlr - very low density lipoprotein rece…	CC	UP
GO:0005886	plasma membrane	7.97e-08	1.2e-05	1.23	9570	1547	2148	428	[Fgfr3 - fibroblast growth factor receptor 3, Itpr3 - inositol 1,4,5-trisphosphate receptor, type 3, Grm8 - glutamate receptor, metabotropic 8, Raph1 - ras association (ralgds/af-6) and pleckstrin homology domains 1, Unc5b - unc-5 homolog b (c. elegans), Ada - adenosine deaminase, Adh7 - alcohol dehydrogenase 7 (class iv), mu or sigma polypeptide, Rhbdl2 - rhomboid, veinlet-like 2 (drosophila), D…	CC	UP
GO:0000777	condensed chromosome kinetochore	1.63e-07	2.27e-05	2.63	9570	44	2148	26	[Nde1 - nude neurodevelopment protein 1, Bub1 - bub1 mitotic checkpoint serine/threonine kinase, Bub1b - bub1 mitotic checkpoint serine/threonine kinase b, Ndc80 - ndc80 kinetochore complex component, Spc25 - spc25, ndc80 kinetochore complex component, Plk1 - polo-like kinase 1, Cenpw - centromere protein w, Nup133 - nucleoporin 133, Mis18bp1 - mis18 binding protein 1, Pmf1 - polyamine-modulated …	CC	UP
GO:0009986	cell surface	2e-07	2.59e-05	1.57	9570	301	2148	106	[Fgfr3 - fibroblast growth factor receptor 3, Anxa2 - annexin a2, Ctsz - cathepsin z, Cdh18 - cadherin 18, type 2, Ada - adenosine deaminase, Il15 - interleukin 15, Lmo7 - lim domain 7, Tgfb2 - transforming growth factor, beta 2, Lrp8 - low density lipoprotein receptor-related protein 8, apolipoprotein e receptor, Adora2b - adenosine a2b receptor, Cd38 - cd38 molecule, Vldlr - very low density li…	CC	UP
GO:0044427	chromosomal part	3.53e-07	4.26e-05	1.36	9570	673	2148	205	[Fen1 - flap structure-specific endonuclease 1, Mybl2 - myeloblastosis oncogene-like 2, Nup43 - nucleoporin 43, Ran - ran, member ras oncogene family, Ska1 - spindle and kinetochore associated complex subunit 1, Aunip - aurora kinase a and ninein interacting protein, Mtbp - mdm2, transformed 3t3 cell double minute 2, p53 binding protein (mouse) binding protein, 104kda, Wdhd1 - wd repeat and hmg-b…	CC	UP
GO:0000940	condensed chromosome outer kinetochore	9.15e-07	0.000104	3.82	9570	14	2148	12	[Spdl1 - spindle apparatus coiled-coil protein 1, Ska3 - spindle and kinetochore associated complex subunit 3, Cenpf - centromere protein f, Ska1 - spindle and kinetochore associated complex subunit 1, Bub1b - bub1 mitotic checkpoint serine/threonine kinase b, Bub1 - bub1 mitotic checkpoint serine/threonine kinase, Ska2 - spindle and kinetochore associated complex subunit 2, Ccnb1 - cyclin b1, Nd…	CC	UP
GO:0098590	plasma membrane region	2.24e-06	0.000239	1.37	9570	550	2148	169	[Anxa2 - annexin a2, Grm8 - glutamate receptor, metabotropic 8, Dagla - diacylglycerol lipase, alpha, Anks1b - ankyrin repeat and sterile alpha motif domain containing 1b, Ncstn - nicastrin, Kif18a - kinesin family member 18a, Lmo7 - lim domain 7, Epha7 - eph receptor a7, Prr7 - proline rich 7 (synaptic), Lrp8 - low density lipoprotein receptor-related protein 8, apolipoprotein e receptor, Cd38 -…	CC	UP
GO:0000775	chromosome, centromeric region	2.44e-06	0.000245	2.42	9570	46	2148	25	[Bub1 - bub1 mitotic checkpoint serine/threonine kinase, Mad2l1 - mad2 mitotic arrest deficient-like 1 (yeast), Aurka - aurora kinase a, Plk1 - polo-like kinase 1, Cenpw - centromere protein w, Ncapd2 - non-smc condensin i complex, subunit d2, Wdhd1 - wd repeat and hmg-box dna binding protein 1, Cdca8 - cell division cycle associated 8, Cenpe - centromere protein e, Kif2c - kinesin family member …	CC	UP
GO:0000776	kinetochore	3.54e-06	0.000338	1.93	9570	97	2148	42	[Nde1 - nude neurodevelopment protein 1, Bub1 - bub1 mitotic checkpoint serine/threonine kinase, Bub1b - bub1 mitotic checkpoint serine/threonine kinase b, Ttk - ttk protein kinase, Cenpi - centromere protein i, Ndc80 - ndc80 kinetochore complex component, Mad2l1 - mad2 mitotic arrest deficient-like 1 (yeast), Spc25 - spc25, ndc80 kinetochore complex component, Plk1 - polo-like kinase 1, Kif18a -…	CC	UP
[truncated: 216 more rows]

## Sheet: D Ctr vs P Ctr
GO.Term	Description	P.value	FDR.q.value	Enrichment	N	B	n	b	Genes	Category	Regulation
[truncated: 719 more rows]

## Sheet: D KD vs D Ctr
GO.Term	Description	P.value	FDR.q.value	Enrichment	N	B	n	b	Genes	Category	Regulation
No enrichment										CC	DOWN
No enrichment										MF	DOWN
[truncated: 92 more rows]

## Sheet: P OE vs P Ctr
GO.Term	Description	P.value	FDR.q.value	Enrichment	N	B	n	b	Genes	Category	Regulation
[truncated: 183 more rows]
