# Supplementary material for: Identification of RBPMS as a mammalian smooth muscle master splicing regulator via proximity of its gene with super-enhancers
Source: eLife. 2019 Jul 8;8:e46327. doi: 10.7554/eLife.46327 (PMC6613909; doi:10.7554/eLife.46327)
Supplement: Supplementary file 6. [file elife-46327-supp6.xlsx]

## Sheet: Cloning
Target	Type	Specie	Forward	Reverse	Vector	Cloning method	Experiment	Note
RBPMS-A	Effector	Rattus norvegicus	CGAAGGACCGGGAAGATGAACGGC	CTCGAGTCAGCAGAACTGCCGGGA	pGEM Teasy		amplified from PAC-1
RBPMS-B	Effector	Rattus norvegicus	CGAAGGACCGGGAAGATGAACGGC	GCTTGCTAATAAATTCAACATGGGAGCTC	pGEM Teasy		amplified from PAC-1
RBPMS 2	Effector	Rattus norvegicus	TCACCATGAGCAACCTGAAGCC	GAGGAGCTAACAGAACTGGCGATA	pGEM Teasy		amplified from PAC-1
RBPMS-A	Effector	Rattus norvegicus	CGAAGGACCGGGCTCGAGGTAACGGCGGC	CGAGACGAATTCTCAGCAGAACTGCCG	Venus C1	XhoI-EcoRI	in vivo overexpression
RBPMS-B	Effector	Rattus norvegicus	CGAAGGACCGGGCTCGAGGTAACGGCGGC	TTGCTAGAATTCTCAACATGGGAG	Venus C1	EcoRI - XhoI	in vivo overexpression
RBPMS 2	Effector	Rattus norvegicus	TTCGATTTCCTCGAGGTAGCAACCTG	GTGATTGAATTCCTAACAGAACTG	Venus C1	EcoRI - XhoI	in vivo overexpression
RBPMS-A	Effector	Rattus norvegicus	CGAAGGACCGGGGAATTCAACGGCGGC	CGAGACCTCGAGTCAGCAGAACTGCCG	Flag3X	EcoRI - XhoI	in vivo overexpression
RBPMS-B	Effector	Rattus norvegicus	CGAAGGACCGGGGAATTCAACGGCGGC	TTGCTACTCGAGTCAACATGGGAG	Flag3X	EcoRI - XhoI	in vivo overexpression
RBPMS 2	Effector	Rattus norvegicus	GAATTCGATTTCGAATTCAGCAACCTG	CTAGTGATTCTCGAGCTAACAGAACTG	Flag3X	EcoRI - XhoI	in vivo overexpression
RBPMS-A	Effector	Rattus norvegicus	AAAAAGCAGGCTCCACCATGGACTACAAAGACCATGACGG	AGAAAGCTGGGTTTTAGCAGAACTGCCGGGACTTCCAGCC	attb PCR for pDONR	Gateway cloning	inducible stable cell line	RBPMSA containing Flag tag
rec RBPMS-A	Effector	Rattus norvegicus	GCTGCTCGACGGATCCGACTACAAAGACCATG	CGAGACACACTCGAGGCAGAACTGCCG	pET21d	BamHI-XhoI	recombinant protein
rec RBPMS-B	Effector	Rattus norvegicus	GCTGCTCGACGGATCCGACTACAAAGACCATG	CTAATACTCGAGACATGGGAGCTC	pET21d	BamHI-XhoI	recombinant protein
Myocd	Reporter	Rattus norvegicus	ATGTCTCGAGGAGCAAGCTCAGAATG	GGGGGATATCAGAGAGATGTTAGG	pGN-GFP	XhoI-EcoRV	in vivo expression
Myocd mCAC1	Reporter	Rattus norvegicus		CTATGGGGAGGCTGCGGGGGGAGGGGACGGGGGG	pGN-GFP	mutagenesis	in vivo expression	CAC-1
Myocd mCAC2	Reporter	Rattus norvegicus		CAGTCGGGGGGGGTAGGGGATGGGGGGGAGAAGC	pGN-GFP	mutagenesis	in vivo expression	CAC-2
Myocd mCAC1 MfeI	Reporter	Rattus norvegicus	CTATGGGGAGGCTGCGGCAATTGGGGACGGGGGGATGGCC	CTATGGGGAGGCTGCGGCAATTGGGGACGGGGGGATGGCC	pGN-GFP	mutagenesis	insert MfeI site into first CAC cluster
Myocd mCAC2 NheI	Reporter	Rattus norvegicus	GGCTTCTCCCCCCCATCCGCTAGCCCCCCCGACTGGCTGCC	GGCAGCCAGTCGGGGGGGCTAGCGGATGGGGGGGAGAAGCC	pGN-GFP	mutagenesis	insert NheI site into first CAC cluster
Myocd UBE2V1 CAC1	Reporter	Rattus norvegicus	AATTGTACTCACTCACTCTCCACGAGC	AATTGCTCGTGGAGAGTGAGTGAGTAC	pGN-GFP	UBE2v1	insert UBE2V1 sequence into mCAC1 myocd
Myocd UBE2V1 CAC2	Reporter	Rattus norvegicus	CTAGCTACTCACTCACTCTCCACGAGG	CTAGCCTCGTGGAGAGTGAGTGAGTAG	pGN-GFP	UBE2v2	insert UBE2V1 sequence into mCAC2 myocd
Myocd	Reporter	Rattus norvegicus	GCCAAAGCTTGGACGGGCCATC	GTGCCGTGAATTCCTCAGGCAGCC	pG4Z	HindIII-EcoRI	in vitro transcription expression/ EMSA and Xlink
Flnb	Reporter	Rattus norvegicus	GCGGCCGCCCGTGTTCACATGAACACACATG	GCATGCAATGTCTGAGTCCCAAGAGGC	pGEM-Teasy		in vivo expression
Flnb	Reporter	Rattus norvegicus	GCAGCTGTAGCGGCCGCCCGTGTTCACATG	GACTAGGTCGCATGCAATGTCTGAGTCC	pGN-GFP	NotI - SphI
Flnb	Reporter	Rattus norvegicus	GTCCCCCCCCCGATCCCCTCCTCATCCCAACCCCCCTCTCTCTCTC	GAGGCTCCACACCTAGAAAAGG	PCR for mutagenesis	mutagenesis	in vivo expression	CAC-1
Flnb	Reporter	Rattus norvegicus	GTAAGATCCCCCTCATGTCCCCCCCTGCTCCCCCCGAATCGCCC	GAGGCTCCACACCTAGAAAAGG		mutagenesis	in vivo expression	CAC-2
Flnb	Reporter	Rattus norvegicus	GCCTGCTACCCCTCTGCCCCTTTAAAACCCCCCTTCTTTTCCAGGC	GAGGCTCCACACCTAGAAAAGG		mutagenesis	in vivo expression	CAC-3
Flnb	Reporter	Rattus norvegicus	CCTGGCCAAGCTTGTGTCCC	GTTGGAATTCGCCTGGAAAAG	pG4Z	HindIII-EcoRI	in vitro transcription expression/ EMSA and Xlink
Tpm1 exon 3 mCAC	Reporter	Rattus norvegicus	GGCGCGCGGTGTGGCCCTGCCCACGAATGGCTAACTTTC	GAAAGTTAGCCATTCGTGGGCAGGGCCACACCGCGCGCC	pT2	mutagenesis	in vivo expression	CAC-1
Tpm1 exon 3 mCAC	Reporter	Rattus norvegicus	CCTTTATGGTCTACGCCCCCTCAACCCGCCCCTTGCGGGATCACG	CGTGATCCCGCAAGGGGCGGGTTGAGGGGGCGTAGACCATAAAGG	pT2	mutagenesis	in vivo expression	CAC-2.1
Tpm1 exon 3 mCAC	Reporter	Rattus norvegicus	GCCCCTTGCGGGATCCCGCTGCCTGCTGCATC	GATGCAGCAGGCAGCGGGATCCCGCAAGGGGC	pT2	mutagenesis	in vivo expression	CAC-2.2
Tpm1 exon 3 mCAC	Reporter	Rattus norvegicus	CTGCCTGCTGCATCCCCCCCCCTTCCCCCTTC	GAAGGGGGAAGGGGGGGGGATGCAGCAGGCAG	pT2	mutagenesis	in vivo expression	CAC-3
Tpm1 exon 3 mCAC	Reporter	Rattus norvegicus	CCCCCTTCCTTCCCCCCCCCCGTACTCCCCTGCCAACTCCCAGC	GCTGGGAGTTGGCAGGGGAGTACGGGGGGGGGGAAGGAAGGGGG	pT2	mutagenesis	in vivo expression	CAC-4
pT2	Reporter	Rattus norvegicus	TCCACTAAGCTTCCGGGCGCGCG	CAGAGATGCTACGTCAGCTTCAGC	pG4Z		in vitro transcription expression/ EMSA and Xlink

## Sheet: qPCR
Target	Specie	Forward	Reverse	Note
Rbpms	Rattus norvegicus	AAAGCCGAGAAGGAGAACACC	TTGAATGGCCTGAAGAGCAG
Rbpms2	Rattus norvegicus	TACGAAGGGTCCTTGATCAAGC	TGCGTTTTTGGCTGCTTCTG
Acta2	Rattus norvegicus	TGAAGAGGAAGACAGCACAGC	AAACAGCCCTGGGAGCATC	SMC marker
Cnn1	Rattus norvegicus	ACAGATCAACCCCTGGATCAG	TTGAGCGTGTCACAGTGTTC	SMC marker
Smtn	Rattus norvegicus	CACGCAAGGCCATGATTGAG	ATCTGCTTGATGCTGTTGGC	SMC marker
Gapdh	Rattus norvegicus	GCCTTCTCTTGTGACAAAGTGGA	CCGTGGGTAGAGTCATACTGGAA	Housekeeper
Rpl32	Rattus norvegicus	GCCCAAGATCGTCAAAAAGAGG	ATCAGGATCTGGCCCTTGAATC	Housekeeper

## Sheet: RT-PCR
Gene name	Species	Genome	AS type	ENSEMBL gene ID	chr	strand	Exon Start	Exon End	Forward	Reverse	Product size (bp)	Note
Flnb	Homo sapiens	hg19	SE	ENSG00000136068	3	+	58127584	58127623	ATCGCCTCCACTGTGAAAAC	AATCCCAGGCCGTTCATGTC	Incl(short): 329; Incl(long): 362; Exl: 290	long is an A5SS
Mprip	Homo sapiens	hg19	SE	ENSG00000133030	17	+	17083920	17083983	ACCCGGCAACTCAGAAACATC	AGCTTCAACCGTTCTTGCAC	Incl: 134; Excl: 102
Tpm1	Homo sapiens	hg19	MXE	ENSG00000140416	15	+	63335905	63336030	GAGCTGGCAGAGAAAAAG / AGGAGGACATCGCGGCCA	TCCAACTCTTCCTCAACCAG	Sm: 181; Nm: 86
Actn1	Homo sapiens	hg19	MXE	ENSG00000072110	14	-	69345705	69345786	ATCAGCCAGGAACAGATG	ACATGAAGTCAATGAAGGCYTG	Sm: 208; Nm: 223; Excl(both): 142
Ncor2	Homo sapiens	hg19	A5SS	ENSG00000196498	12	-	124811955	124812179	ACACCCACAACCGGAATGAGCCTG	GGACTTGGCTTTTCGGCTGCTG	Incl(long): 365; Incl(short): 226; Excl: 140
Itga7	Rattus norvegicus	rn6	MXE	ENSRNOG00000007905	7	+	3363146	3363278	GGGGAGTGGAAGTTCTGTGA	CCTTCCCAGAATCAATGGAG	Sm: 291; Nm: 279
Tpm1	Rattus norvegicus	rn6	MXE	ENSRNOG00000018184	8	-	72840038	72840164	AGGAGGACATCTCAGCAA / GAGCTGGCGGAGAAAAAG	CCAACTCCTCCTCAACCAG	Sm: 185; Nm: 96
Actn1	Rattus norvegicus	rn6	MXE	ENSRNOG00000056756	6	-	103379819	103379900	ATCAGCCAGGAACAGATG	ACATGAAGTCAATGAAGGCYTG	Sm: 209; Nm: 223; Excl(both): 142
Flnb	Rattus norvegicus	rn6	SE	ENSRNOG00000009470	15	-	18780269	18780341	CAGGGAAGGGGAAAGTCACC	ACTCACTGGGACATAGGCCT	Incl: 251, 283; Excl: 212
Piezo1	Rattus norvegicus	rn6	SE	ENSRNOG00000056786	19	-	55313726	55313798	CAACTCCAGTCCACAGACCC	TTCCTCCTCACTGTCCGACT	Incl: 153; Excl: 81
Ptprf	Rattus norvegicus	rn6	SE	ENSRNOG00000019977	5	-	137046364	137046397	CGTCAAAGGATGAGCAGTCAATC	CCCATCATTGGCTTTGAGAC	Incl: 203; Excl: 170
Hspg2	Rattus norvegicus	rn6	SE	ENSRNOG00000021437	5	+	155853492	155853543	CTGGGGGTTCAAGTTCCGAC	CGTGCAGACTCTTGGGAACT	Incl: 109; Excl: 53
Ppfia1	Rattus norvegicus	rn6	SE	ENSRNOG00000020857	1	-	217680291	217680366	GCCAGTTGCAAGAACGTCTG	TTGCCATGTCTCTCCTCAGC	Incl: 215; Excl: 139
Ppfib1	Rattus norvegicus	rn6	SE	ENSRNOG00000031709	4	+	181394960	181394993	GACGAAAGGAGAAGGGGTCG	CCATCAGAGACTCCACTGCC	Incl: 114; Excl: 80
Mbnl1	Rattus norvegicus	rn6	SE	ENSRNOG00000014076	2	+	150864085	150864121	AGCTGTACTTCCCCCATTGC	TGGCTAGTCAGATGTTCGGC	Ex7: 215; Ex8: 272; Ex7+8: 310; Excl: 178
Mbnl2	Rattus norvegicus	rn6	SE	ENSRNOG00000010737	15	+	105772324	105772403	GCCTTCCCTCCCGGTGCTCTTC	GCAGATTCTTGGCATTCCATTCC	Ex 7: 239; Ex 8: 298; Ex7+8 incl: 334; Excl: 203
Myocd	Rattus norvegicus	rn6	SE	ENSRNOG00000003669	10	-	51733970	51734014	CAGTTACGGCTTCAACAGAGAA	TTTTCCTCGGGTCATGGAAC	Incl: 144; Excl: 100
Arhgef7	Rattus norvegicus	rn6	SE	ENSRNOG00000012934	16	-	83023988	83024213	GAAGGTCACGTCTGTGAGCAACC	GTCTTGGGACTCCTGCTGAG	Incl: 306, Excl: 81
Smtn	Rattus norvegicus	rn6	SE	ENSRNOG00000019451	14	-	83758453	83758596	TTCTTCCCTGAGGCTTTTGA	TGGTTGTACAGCGATTGCAC	Incl: 356bp; Excl: 191
Cald	Rattus norvegicus	rn6	SE	ENSRNOG00000010233	4	+	62260091	62260175	CAGGATGCTGAAGACAAAAAGA / AGGCACAAGACGACAGACTG	TGTGGGTCATGAATTCTCCA	Incl:243; Excl: 160; Incl(A5SS): 293; Excl(A5SS): 211;
Lsm14b	Rattus norvegicus	rn6	SE	ENSRNOG00000054557	3	+	175415535	175415613	GCTAAGAAGCTGTTGCCCAG	GCGATTTTGCCCTCTGGAAC	Incl: 202; Excl: 124
Ncor2	Rattus norvegicus	rn6	A5SS	ENSRNOG00000001004	12	+	37030871	37031101	ACACCCATAACCGGAATGAGCCTG	GGACTTGGCTTTTCGGCTGCTG	Incl(short): 227; Incl(long): 368; Excl:140	long is an A5SS

## Sheet: Antibodies
Gene name	Antibody	[] WB
ACTA2	Agilent/Dako, M0851	1 in 500
CALD1	Abcam, 32330	1 in 10000
GAPDH	Santa Cruz, sc-25778	1 in 1000
LSM14b	Sigma Aldrich, HPA041274	1 in 1000
MBNL1	in-house polyclonal antibody	1 in 1000
MBNL2	Santa Cruz, sc-134813	1 in 2000
RBPMS	Sigma Aldrich, HPA056999	1 in 500
TUBULIN	Abcam, ab6160	1 in 5000
FLAG	Sigma Aldrich, F-1804	1 in 2000
GFP	Invitrogen, A-11122	1 in 1500
